# Quantitative proteomics analysis of young and elderly skin with DIA mass spectrometry reveals new skin aging-related proteins

Jing Ma<sup>1,2</sup>, Mengting Liu<sup>1,2</sup>, Yaochi Wang<sup>1,2</sup>, Cong Xin<sup>1,2</sup>, Hui Zhang<sup>1,2</sup>, Shirui Chen<sup>1,2</sup>, Xiaodong Zheng<sup>1,2</sup>, Xuejun Zhang<sup>1,2</sup>, Fengli Xiao<sup>1,2,3</sup>, Sen Yang<sup>1,2</sup>

<sup>1</sup>Department of Dermatology of First Affiliated Hospital, and Institute of Dermatology, Anhui Medical University, Hefei, Anhui, China

<sup>2</sup>Key Laboratory of Dermatology, Anhui Medical University, Ministry of Education, Hefei, Anhui, China

<sup>3</sup>The Center for Scientific Research of Anhui Medical University, Hefei, Anhui, China

**Correspondence to:** Sen Yang, Fengli Xiao; **email:** [yang2004sen@163.com](mailto:yang2004sen@163.com), [xiaofengli@126.com](mailto:xiaofengli@126.com)

**Keywords:** aging, epidermal proteins, skin rejuvenation and aging, proteome, mass spectrometer

**Received:** February 25, 2020

**Accepted:** May 27, 2020

**Published:**

**Copyright:** Ma et al. This is an open-access article distributed under the terms of the Creative Commons Attribution License (CC BY 3.0), which permits unrestricted use, distribution, and reproduction in any medium, provided the original author and source are credited.

## ABSTRACT

Skin aging is a specific manifestation of the physiological aging process that occurs in virtually all organisms. In this study, we used data independent acquisition mass spectrometry to perform a comparative analysis of protein expression in volar forearm skin samples from of 20 healthy young and elderly Chinese individuals. Our quantitative proteomic analysis identified a total of 95 differentially expressed proteins (DEPs) in aged skin compared to young skin. Enrichment analyses of these DEPs (57 upregulated and 38 downregulated proteins) based on the GO, KEGG, and KOG databases revealed functional clusters associated with immunity and inflammation, oxidative stress, biosynthesis and metabolism, proteases, cell proliferation, cell differentiation, and apoptosis. We also found that GAPDH, which was downregulated in aged skin samples, was the top hub gene in a protein-protein interaction network analysis. Some of the DEPs identified herein had been previously correlated with aging of the skin and other organs, while others may represent novel age-related entities. Our non-invasive proteomics analysis of human epidermal proteins may guide future research on skin aging to help develop treatments for age-related skin conditions and rejuvenation.

## INTRODUCTION

Aging is a normal physiological phenomenon related to progressive deficits in various physiological variables such as cellular redox status, immunity, and metabolism, which contribute to disruption of tissue homeostasis. Skin aging is a specific manifestation of organ aging in the human body and results also from the combined effects of the above factors. Specific features of skin aging include thinning of the epidermis, degeneration of elastic tissues, reduction of melanocyte numbers, and impaired barrier function, which manifest as wrinkles, decreased elasticity, dryness, and dyschromia [1]. Many intrinsic and extrinsic factors

contribute to skin aging. They include changes in reactive oxygen species (ROS) generation and compensatory antioxidant mechanisms, dysregulated autophagy, chronic inflammation, cell metabolic disorders, and endocrine decline, all of which are impacted by each individual's genetic makeup and lifestyle habits. On the other hand, environmental factors such as light damage, especially ultraviolet (UV) light exposure, are also major contributors to skin aging.

Cellular senescence as the basis of endogenous (i.e. intrinsic or chronological) aging is largely determined by gradual, age-dependent shortening of the telomeres, small DNA sequences present at the ends of

chromosomes. Telomerase enzymes act as reverse transcriptases to extend the telomeres and slow cellular aging; however, this topic is still controversial. For instance, increased telomere length may be associated with increased risk of melanoma, while shortened telomeres may confer greater risk for cutaneous squamous cell carcinomas [2].

ROS are natural byproducts of cellular respiration. Imbalances between ROS generation and elimination can cause DNA mutations and cell damage, hinder protein synthesis, and induce apoptosis of skin cells [3]. Research also showed that ROS can inhibit the production of collagen in aging skin by activating the MAPK-AP-1/NF- $\kappa$ B-TNF- $\alpha$ /IL-6 pathway [4]. In turn, NF- $\kappa$ B activation through the mTORC2/Akt/IKK $\alpha$  pathway was also shown to influence skin aging [5].

Environmental factors can also reduce skin elasticity and increase collagen fiber damage. UV radiation is the main cause of skin photoaging. Interestingly, repeated UV radiation causes damage to the dermis and dermal extracellular matrix by promoting chronic inflammation [6]. UV rays induce oxidative stress in epidermal cells, which leads to peroxidation of membrane lipids. The damaged cells are recognized by the complement system and cause inflammation, leading to macrophage infiltration and activation. Activated macrophages remove damaged cells and release MMPs to degrade the extracellular matrix. UV light can also induce epidermal keratinocytes to release inflammatory cytokines such as IL-1 $\beta$  and TNF- $\alpha$ ; accordingly, global gene expression profiling studies have linked photoaging to differential expression of several inflammation-related genes [7, 8].

Through LC-MS-based proteomics and bioinformatics analyses, the present study evaluated differences in the expression of epidermal proteins between healthy young and elderly subjects to identify differentially expressed proteins (DEPs) possibly involved in skin aging. We also addressed the potential implications of our findings on skin aging mechanisms such as oxidative stress, metabolic reprogramming, and chronic inflammation induced by either physiological aging or photoaging.

## RESULTS

### Quantitative protein detection

Conventional data dependent acquisition (DDA) mass spectrometry was used to establish and analyze a spectral library of human volar skin proteins obtained from 20 healthy subjects, i.e. 10 young and 10 elderly Chinese individuals. As a result, 9005 peptides and 1631 proteins were identified. Supplementary Table 1 lists the details of the proteins produced by DDA. Next,

we adopted the data independent acquisition (DIA) method for mass spectrometry data collection. The details of the proteins identified and quantified by DIA are shown in Supplementary Table 2. After calculating the fold difference and P value through the MSstats package, 1270 proteins were further identified (Supplementary Table 3). Fold change  $\geq 1.5$  and  $P < 0.05$  were used as the screening criteria for significantly differentially expressed proteins (DEPs). Compared with the young (control) group, a total of 95 proteins were differentially expressed in the elderly (experimental) group. Among these DEPs, 57 were upregulated and 38 were downregulated (Figure 1). These DEPs were used to draw a cluster analysis chart (Figure 2), which intuitively reflected expression differences between the two groups. Principal component analysis (PCA) showed that the DEPs segregated into two separate clusters that can distinguish the young group from the elderly group (Supplementary Figure 1). Functional categorization and UniProt information for the upregulated and downregulated DEPs are provided in Tables 1 and 2, respectively.

### GO enrichment analysis

To evaluate the functional significance of all identified proteins, Blast2GO software was used to perform gene ontology (GO) annotation analysis. Protein information and visualization of results are provided in Supplementary Table 4 and Figure 3, respectively. The most enriched biological processes (out of 28 GO

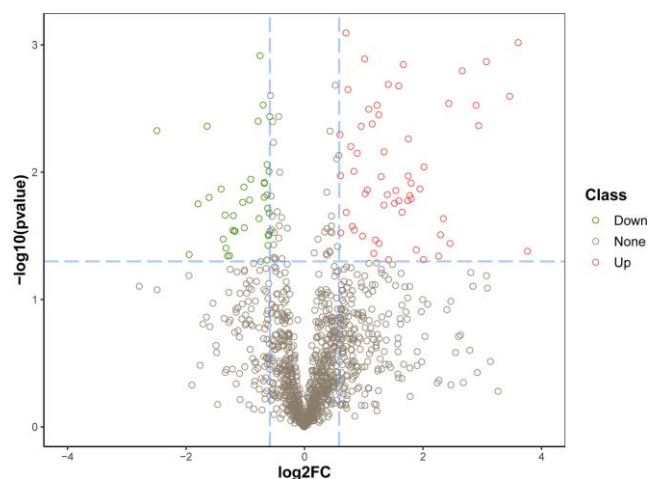

**Figure 1. Identification of DEPs in aged skin samples.** The X axis represents protein difference (log<sub>2</sub>-transformed fold changes), and the Y axis the corresponding -log<sub>10</sub>-transformed P values. Red dots indicate significantly upregulated proteins, green dots denote significantly downregulated proteins, and gray dots symbolize proteins with no significant change.

terms) were: ‘cellular process’, ‘metabolic process’, ‘biological regulation’, ‘regulation of biological process’, and ‘response to stimulus’. The most enriched cell components (out of 19 GO terms) were: ‘cell’, ‘cell part’, and ‘organelle’. The most enriched molecular functions (out of 12 GO items) were: ‘binding’ and ‘catalytic activity’.

Next, we carried out GO enrichment analysis of the identified DEPs (Supplementary Table 5). Based on these results, we generated GO functional classification maps to represent all DEPs (Figure 4) and to discriminate up- and down-regulated proteins (Figure 5). It can be seen that in general, both up- and downregulated DEPs intervene in common structural or functional processes. However, unique enrichment by upregulated proteins (e.g. molecular transducer activity, antioxidant activity, molecular carrier activity) or downregulated proteins (e.g. signal transducer activity, transcription regulator activity) was detected for some GO terms within the biological process and molecular function categories (Figure 5).

### KOG classification

Next, we predicted the potential functions of the identified DEPs using EuKaryotic orthologous groups

(KOG), a database for the classification of protein orthologs (Supplementary Table 6 and Figure 6). The most represented KOG category was "cell processes and signaling", which showed predominant association of the DEPs with post-translational modification, protein turnover, chaperone activity, intracellular trafficking, secretion, and vesicular transport.

### KEGG pathway analysis

Then, we conducted KEGG enrichment analysis to further characterize the biological functions of the identified DEPs (Supplementary Table 7). Results showed that upregulated proteins were annotated to 25 major pathways. Among these, the most enriched were ‘complement and coagulation cascade’ and ‘platelet activation’. In turn, downregulated proteins were annotated to 14 major pathways, the most enriched ones being ‘platelet activation’ and ‘tight junction’ (Figure 7). The 8 highest ranked biological functions for our DEP set are shown in Figure 8. Among these pathways, ‘complement and coagulation cascades’ is enriched in SERPINC1, A2M, FGG, FGB, FGA, CLU, PIP, and other proteins whose expression is known to increase with age. On the other hand, several metabolic processes, especially some related to lipid metabolism, were also enriched in various DEPs detected in our aged skin samples.

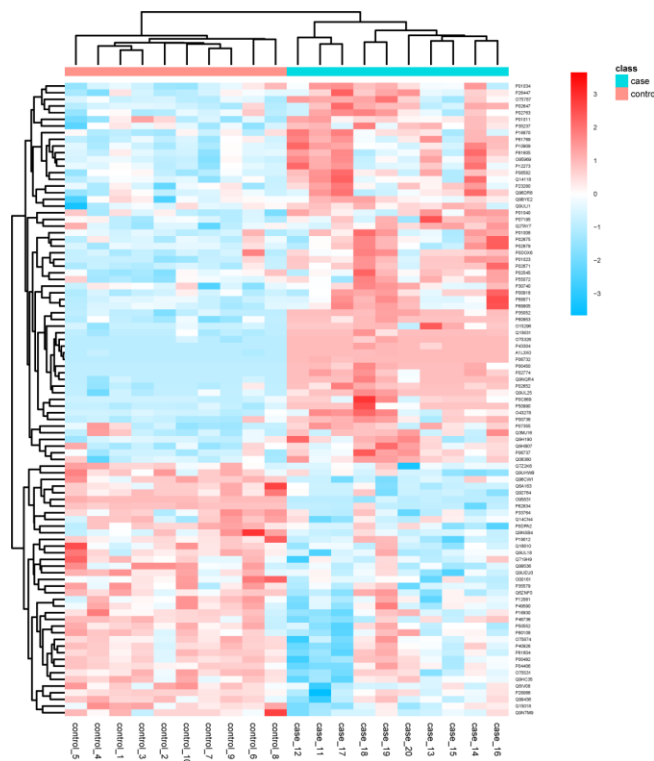

**Figure 2. Cluster analysis chart of the identified DEPs.** Higher red and blue intensities indicate higher degree of upregulation and downregulation, respectively.

**Table 1. List of up-regulated proteins.**

| Category                                              | Accession number | Description                                         | Gene name | pvalue   |
|-------------------------------------------------------|------------------|-----------------------------------------------------|-----------|----------|
| Immune and inflammatory response protein              | P02763           | Alpha-1-acid glycoprotein 1                         | ORM1      | 0.020624 |
|                                                       | Q08380           | Galectin-3-binding protein                          | LGALS3BP  | 0.000807 |
|                                                       | P01023           | Alpha-2-Macroglobulin, Alpha-2-M                    | A2M       | 0.031029 |
|                                                       | P61769           | Beta-2-microglobulin                                | B2M       | 0.0021   |
|                                                       | P81605           | Dermcidin                                           | DCD       | 0.012168 |
|                                                       | P0DOX6           | Immunoglobulin mu heavy chain                       | N/A       | 0.03629  |
|                                                       | P69905           | Hemoglobin subunit alpha                            | HBA1      | 0.00096  |
| Blood particles                                       | P68871           | Hemoglobin subunit beta                             | HBB       | 0.002533 |
|                                                       | P00738           | Haptoglobin                                         | HP        | 0.002984 |
|                                                       | P01008           | Antithrombin-III                                    | SERPINC1  | 0.036303 |
|                                                       | P02679           | Fibrinogen gamma chain                              | FGG       | 0.040763 |
|                                                       | P02675           | Fibrinogen beta chain                               | FGB       | 0.048723 |
|                                                       | P02671           | Fibrinogen alpha chain                              | FGA       | 0.004311 |
|                                                       | P02652           | Apolipoprotein A-II                                 | APOA2     | 0.001355 |
| Lipid metabolism related protein                      | P02647           | Apolipoprotein A-I                                  | APOA1     | 0.002888 |
|                                                       | A1L3X0           | Elongation of very long chain fatty acids protein 7 | ELOVL7    | 0.006917 |
|                                                       | O15296           | Arachidonate 15-lipoxygenase B                      | ALOX15B   | 0.016722 |
|                                                       | P0C869           | Cytosolic phospholipase A2 beta                     | PLA2G4B   | 0.034032 |
|                                                       | Q3MJ16           | Cytosolic phospholipase A2 epsilon                  | PLA2G4E   | 0.028501 |
|                                                       | P01011           | Alpha-1-antichymotrypsin                            | SERPINA3  | 0.004355 |
|                                                       | P01040           | Cystatin-A                                          | CSTA      | 0.006286 |
| Protease inhibitor                                    | P01034           | Cystatin-C                                          | CST3      | 0.007101 |
|                                                       | P30740           | Leukocyte elastase inhibitor                        | SERPINB1  | 0.013816 |
|                                                       | P35237           | Serpin B6                                           | SERPINB6  | 0.002979 |
|                                                       | O43278           | Kunitz-type protease inhibitor 1                    | SPINT1    | 0.018128 |
| Calbindin                                             | Q14118           | Dystroglycan                                        | DAG1      | 0.014746 |
|                                                       | P26447           | Protein S100-A4                                     | S100A4    | 0.002244 |
| Metal ion related protein                             | P08582           | Melanotransferrin                                   | MELTF     | 0.01071  |
|                                                       | P00450           | Ceruloplasmin                                       | CP        | 0.029955 |
|                                                       | O75326           | Semaphorin-7A                                       | SEMA7A    | 0.002046 |
| Signal transduction related protein                   | P60953           | Cell division control protein 42 homolog            | CDC42     | 0.003204 |
|                                                       | Q96DR8           | Mucin-like protein 1                                | MUCL1     | 0.048572 |
|                                                       | P16870           | Carboxypeptidase E                                  | CPE       | 0.01083  |
|                                                       | P43304           | Glycerol-3-phosphate dehydrogenase, mitochondrial   | GPD2      | 0.04563  |
| Protease                                              | P06732           | Creatine kinase M-type                              | CKM       | 0.041678 |
|                                                       | P07195           | L-lactate dehydrogenase B chain                     | LDHB      | 0.01678  |
|                                                       | P06737           | Glycogen phosphorylase, liver form                  | PYGL      | 0.020716 |
|                                                       | P00918           | Carbonic anhydrase 2                                | CA2       | 0.005483 |
|                                                       | P23280           | Carbonic anhydrase 6                                | CA6       | 0.003541 |
|                                                       | Q9NQR4           | Omega-amidase NIT2                                  | NIT2      | 0.015016 |
|                                                       | P55072           | Transitional endoplasmic reticulum ATPase           | VCP       | 0.01621  |
| Chaperone                                             | P10909           | Clusterin                                           | CLU       | 0.001427 |
|                                                       | P50990           | T-complex protein 1 subunit theta                   | CCT8      | 0.04342  |
|                                                       | Q15631           | Translin                                            | TSN       | 0.009122 |
| Apoptosis, proliferation and differentiation proteins | P35052           | Glypican-1                                          | GPC1      | 0.015251 |
|                                                       | P02545           | Prelamin-A/C                                        | LMNA      | 0.017547 |
|                                                       | P12273           | Prolactin-inducible protein                         | PIP       | 0.013534 |
|                                                       | Q9H190           | Syntenin-2                                          | SDCBP2    | 0.026649 |
|                                                       | P07355           | Annexin A2                                          | ANXA2     | 0.005062 |
| Others                                                | P02774           | Vitamin D-binding protein                           | GC        | 0.023154 |

|        |                                                     |          |          |
|--------|-----------------------------------------------------|----------|----------|
| Q9BYE2 | Transmembrane protease serine 13                    | TMPRSS13 | 0.031752 |
| Q9UL25 | Ras-related protein Rab-21                          | RAB21    | 0.009851 |
| Q2TAY7 | WD40 repeat-containing protein<br>SMU1              | SMU1     | 0.004182 |
| O95969 | Secretoglobin family 1D member 2                    | SCGB1D2  | 0.001598 |
| Q9ULI1 | NACHT and WD repeat domain-<br>containing protein 2 | NWD2     | 0.010662 |
| O75787 | Renin receptor                                      | ATP6AP2  | 0.00129  |
| Q9HB07 | UPF0160 protein MYG1,<br>mitochondrial              | C12orf10 | 0.013933 |

**Table 2. List of down-regulated proteins.**

| Category                                                         | Accession number | Description                                                       | Gene name | pvalue  |
|------------------------------------------------------------------|------------------|-------------------------------------------------------------------|-----------|---------|
| Keratin                                                          | P19012           | Keratin, type I cytoskeletal 15                                   | KRT15     | 0.00985 |
|                                                                  | Q6A163           | Keratin, type I cytoskeletal 39                                   | KRT39     | 0.02171 |
|                                                                  | Q14CN4           | Keratin, type II cytoskeletal 72                                  | KRT72     | 0.04435 |
|                                                                  | Q92764           | Keratin, type I cuticular Ha5                                     | KRT35     | 0.00436 |
|                                                                  | Q9NSB4           | Keratin, type II cuticular Hb2                                    | KRT82     | 0.02896 |
| Vesicle transport related protein                                | O00161           | Synaptosomal-associated protein 23                                | SNAP23    | 0.01512 |
|                                                                  | Q99536           | Synaptic vesicle membrane protein<br>VAT-1 homolog                | VAT1      | 0.00397 |
|                                                                  | Q9UEU0           | Vesicle transport through interaction<br>with t-SNAREs homolog 1B | VTI1B     | 0.00366 |
|                                                                  | Q96CW1           | AP-2 complex subunit mu                                           | AP2M1     | 0.04896 |
| Apoptosis, proliferation and<br>differentiation-related proteins | P62834           | Ras-related protein Rap-1A                                        | RAP1A     | 0.04527 |
|                                                                  | Q15018           | BRISC complex subunit Abraxas 2                                   | ABRAXAS2  | 0.00122 |
|                                                                  | O95831           | Apoptosis-inducing factor 1,<br>mitochondrial                     | AIFM1     | 0.01223 |
|                                                                  | O75531           | Barrier-to-autointegration factor                                 | BANF1     | 0.00472 |
|                                                                  | P04406           | Glyceraldehyde-3-phosphate<br>dehydrogenase                       | GAPDH     | 0.02905 |
| Enzymes related to biosynthesis<br>and metabolism                | P00492           | Hypoxanthine-guanine<br>phosphoribosyltransferase                 | HPRT1     | 0.02192 |
|                                                                  | P40926           | Malate dehydrogenase,<br>mitochondrial                            | MDH2      | 0.01773 |
|                                                                  | O75874           | Isocitrate dehydrogenase [NADP]<br>cytoplasmic                    | IDH1      | 0.03353 |
| Calbindin                                                        | P33764           | Protein S100-A3                                                   | S100A3    | 0.01579 |
| Chaperone                                                        | P61604           | 10 kDa heat shock protein,<br>mitochondrial                       | HSPE1     | 0.01724 |
|                                                                  | Q7Z2K6           | Endoplasmic reticulum<br>metallopeptidase 1                       | ERMP1     | 0.01922 |
| Proteases                                                        | P46736           | Lys-63-specific deubiquitinase<br>BRCC36                          | BRCC3     | 0.0131  |
|                                                                  | Q6ZNF0           | Acid phosphatase type 7                                           | ACP7      | 0.01572 |
|                                                                  | P16930           | Fumarylacetoacetase                                               | FAH       | 0.02091 |
|                                                                  | P80108           | Phosphatidylinositol-glycan-specific<br>phospholipase D           | GPLD1     | 0.03758 |
|                                                                  | P28066           | Proteasome subunit alpha type-5                                   | PSMA5     | 0.02911 |
|                                                                  | Q99436           | Proteasome subunit beta type-7                                    | PSMB7     | 0.01204 |
|                                                                  | Q8IV08           | 5'-3' exonuclease PLD3                                            | PLD3      | 0.00297 |
| Cytoskeleton related protein                                     | Q9HC35           | Echinoderm microtubule-associated<br>protein-like 4               | EMAL4     | 0.01354 |
|                                                                  | P35579           | Myosin-9                                                          | MYH9      | 0.01136 |
|                                                                  | P50552           | Vasodilator-stimulated<br>phosphoprotein                          | VASP      | 0.02732 |
| Gene expression related protein                                  | P12081           | Histidine--tRNA ligase, cytoplasmic                               | HARS      | 0.0395  |
|                                                                  | P49590           | Probable histidine--tRNA ligase,<br>mitochondrial                 | HARS2     | 0.04557 |
| Others                                                           | Q9UL18           | Protein argonaute-1                                               | AGO1      | 0.01655 |
|                                                                  | Q16610           | Extracellular matrix protein 1                                    | ECM1      | 0.00873 |
|                                                                  | P0DPA2           | V-set and immunoglobulin domain-<br>containing protein 8          | VSIG8     | 0.02862 |

|        |                                         |         |         |
|--------|-----------------------------------------|---------|---------|
| Q9NTM9 | Copper homeostasis protein cutC homolog | CUTC    | 0.03146 |
| Q719H9 | BTB/POZ domain-containing protein KCTD1 | KCTD1   | 0.03087 |
| Q9UHW9 | Solute carrier family 12 member 6       | SLC12A6 | 0.02313 |

### Subcellular localization and protein-protein interaction network analyses

We next used WoLF PSORT software to predict the subcellular localization of the identified DEPs (Figure 9). Results showed that the intracellular, extracellular, mitochondria, and plasma membrane compartments

were the most represented structures (see Supplementary Table 8 for detailed information).

The DEPs were next imported into the STRING database (STRING 11.0) to perform network interaction analysis of protein-protein relationships in the first 100 confidence intervals (Figure 10). Two main clusters

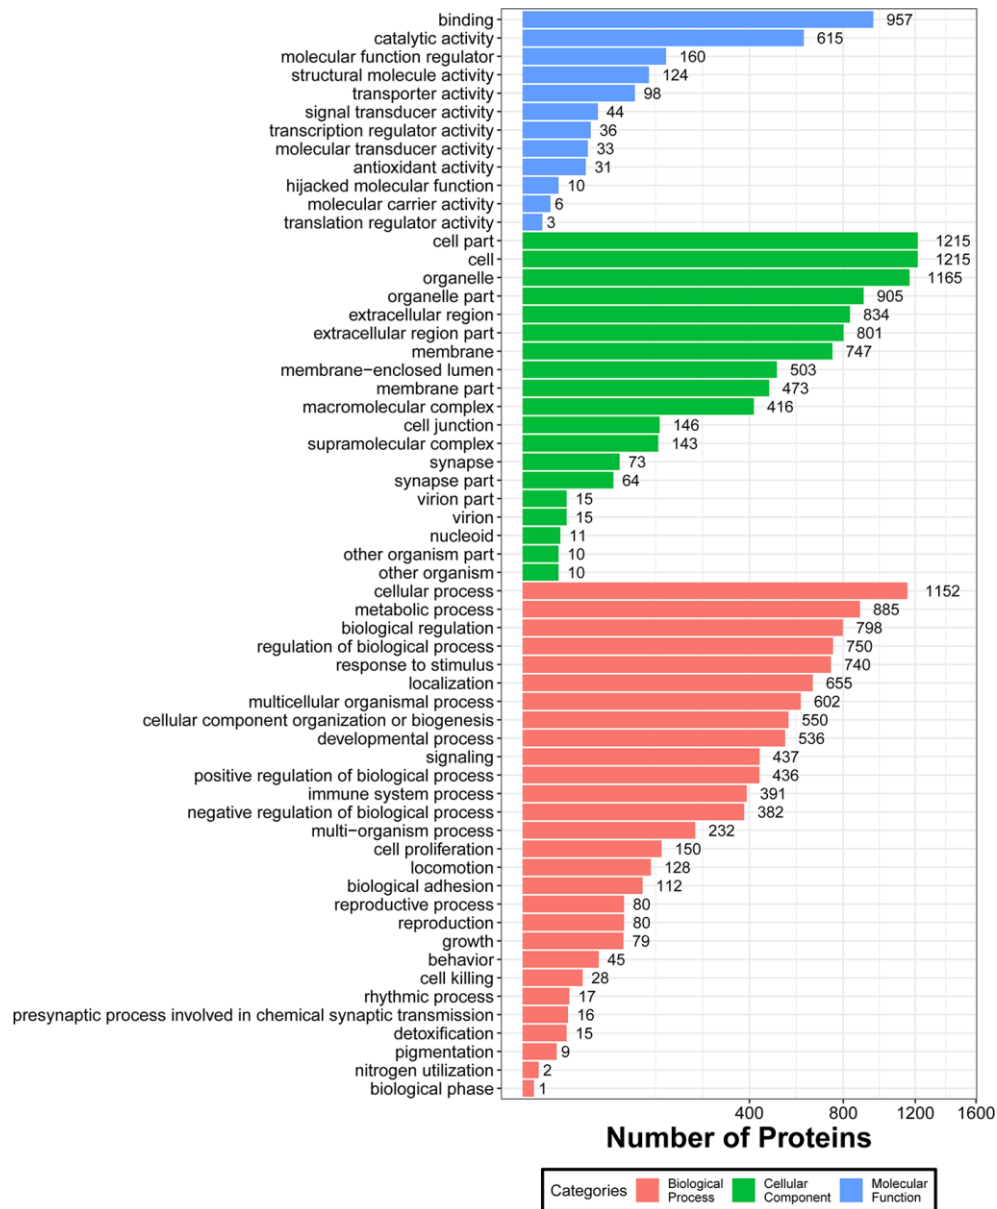

Figure 3. Functional GO classification of all the identified skin proteins.

were identified, which correspond to two broad functions, namely immunity and inflammation (which included A2M, FGG, FGA, FGB, APOA1, HP, CLU, SERPINC1, B2M), and metabolic processes (which included MDH2, PYGL, CKM, GAPDH, GPD2, IDH1, NIT2). Further analysis on Cytoscape [9] showed that GAPDH, a key enzyme in carbohydrate metabolism, had the highest node degree and represented the top hub protein among all DEPs.

## DISCUSSION

As the largest organ of the human body exposed to the external environment, the skin controls water loss and acts as a physical, anti-microbial, and immune barrier. Over time, the skin is subjected to both natural (chronological) aging and photoaging caused by UV

rays. Main features of skin aging are thinning of the epidermis, degeneration of elastic tissue, loss of melanocytes, and decreased barrier function. The molecular basis of skin aging involves cell senescence, oxidative stress, chronic inflammation, reduced DNA repair ability, telomere shortening, point mutations in nuclear mitochondrial DNA, increased frequency of chromosome abnormalities, gene mutations, etc. [10]. In this study, we used LC-MS/MS to compare the expression of skin proteins between young and older people. Results showed that 95 proteins (57 upregulated and 38 downregulated) were differentially expressed in aged human skin.

### Upregulated proteins

Go and KEGG enrichment analyses indicated that several upregulated DEPs identified herein play a role

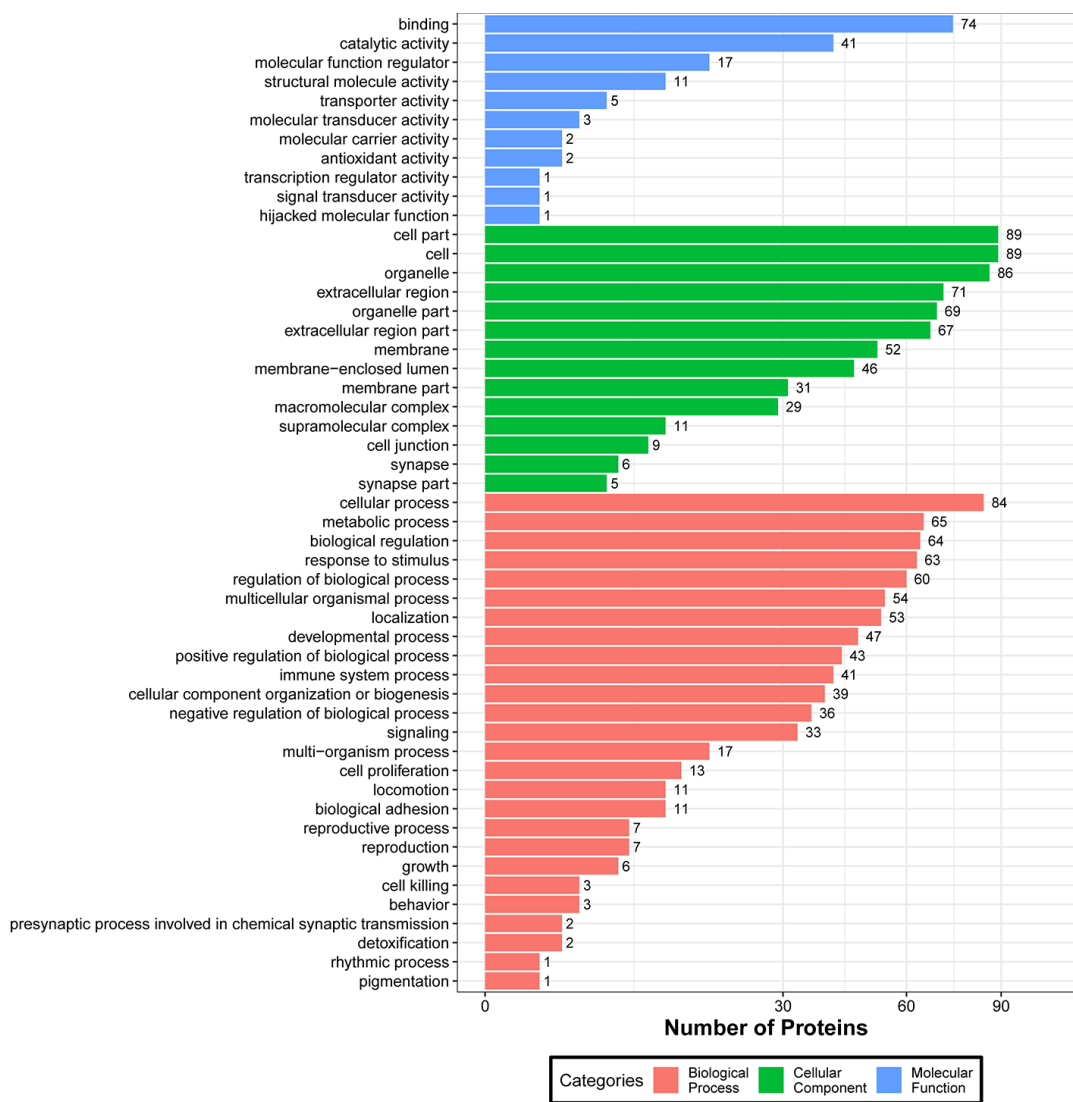

Figure 4. Functional GO classification of DEPs.

in chronic inflammation, a common contributor to skin aging. KEGG analysis showed that ‘platelet activation’ and ‘complement and coagulation cascade’ were the two most enriched pathways. UV light induces the

accumulation of ROS, which are recognized by the complement system, causing chronic inflammation. At the same time, excessive UV induction can directly increase the synthesis of complement factors in the skin

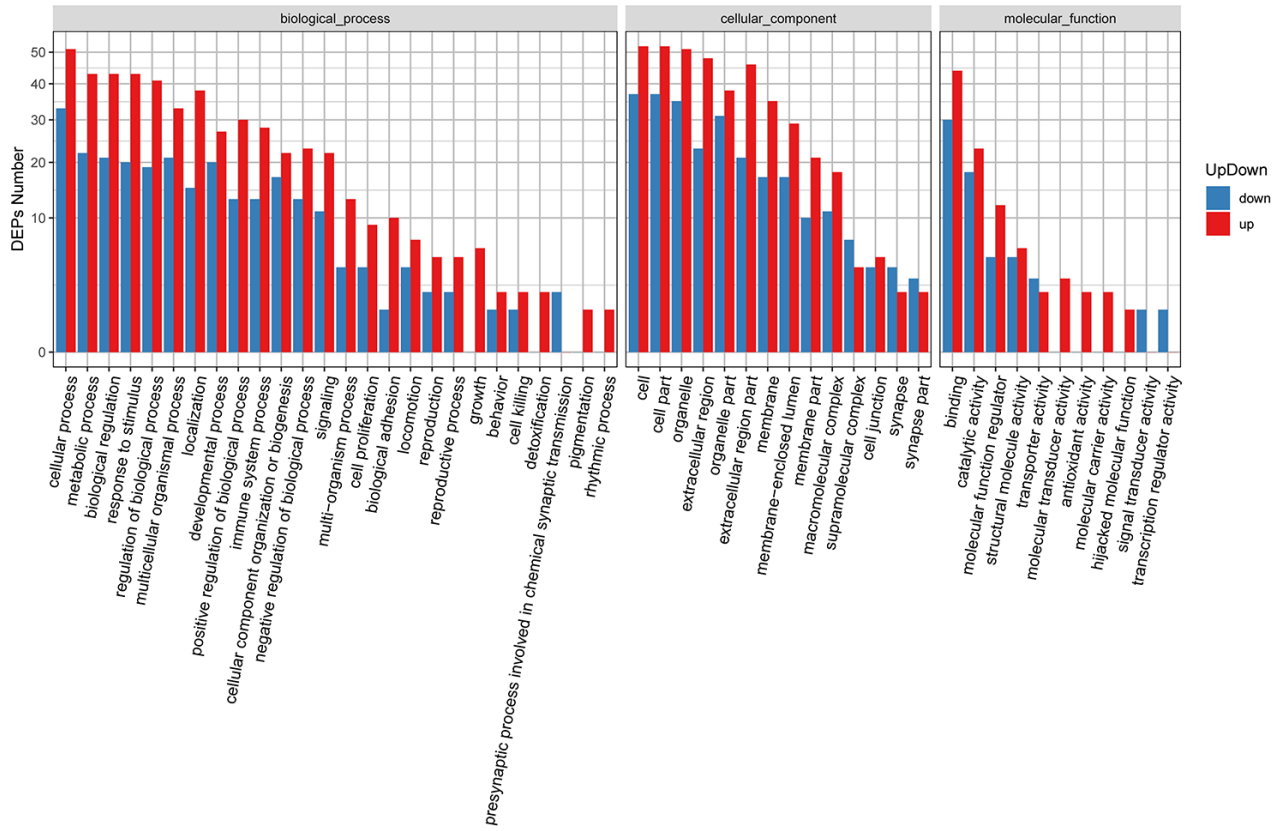

Figure 5. GO classification of upregulated and downregulated DEPs.

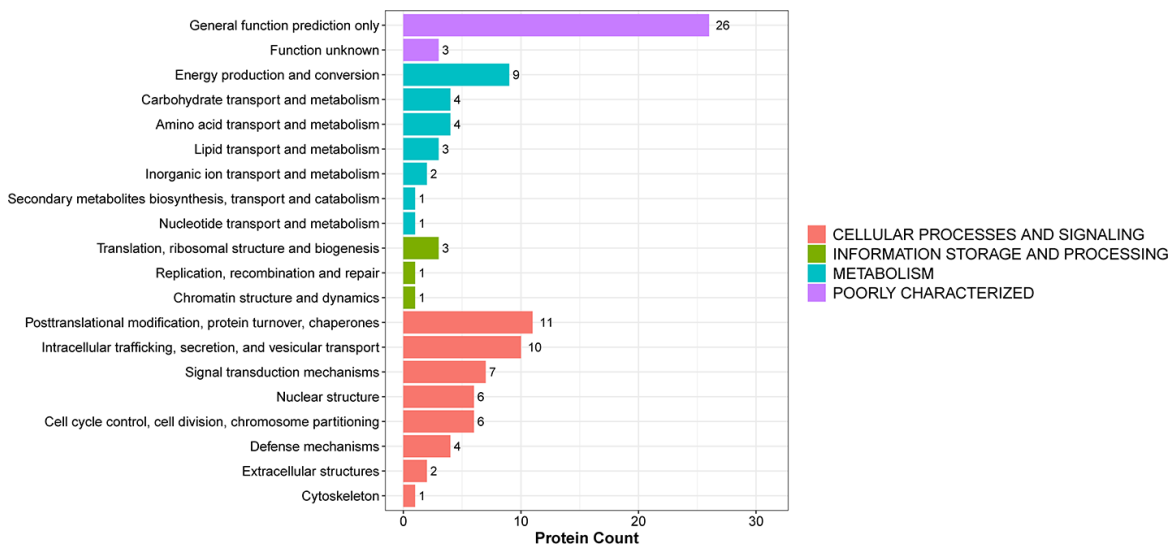

Figure 6. KOG functional annotation of DEPs.



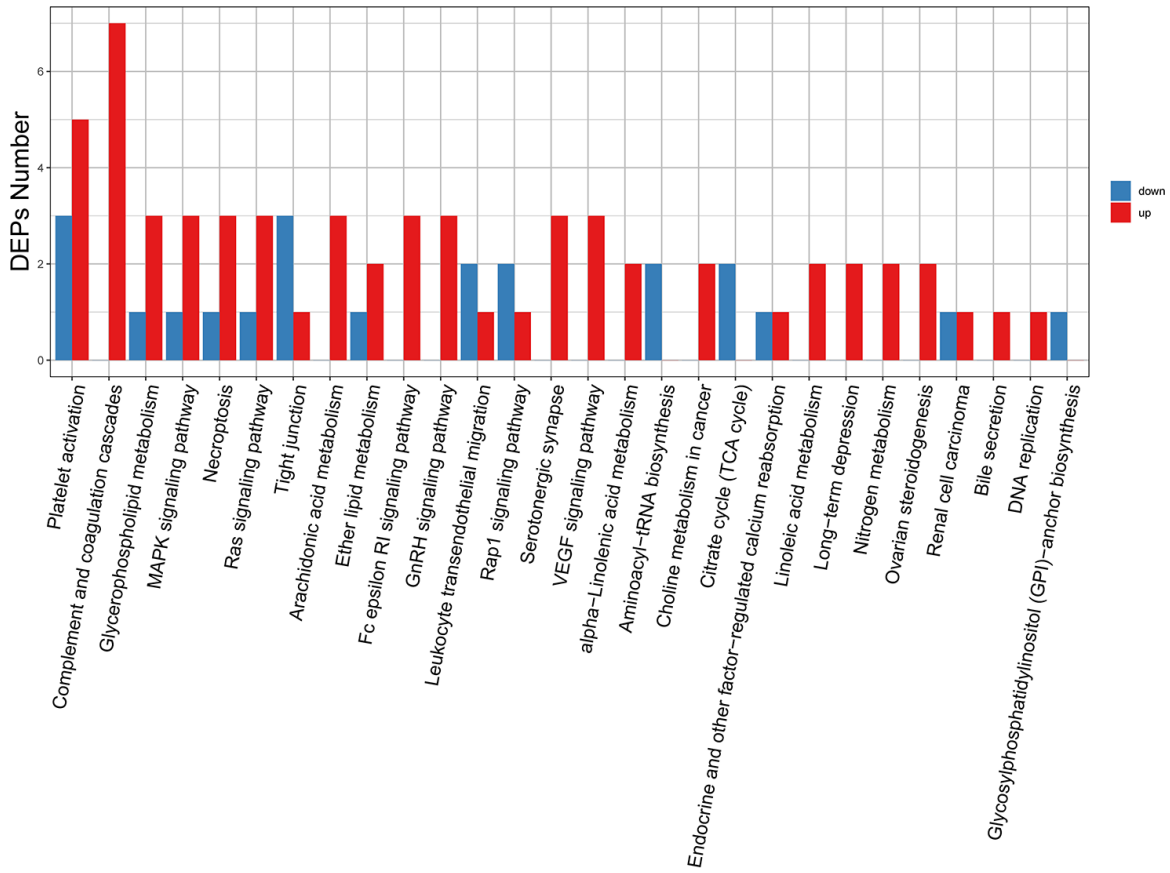

**Figure 7. KEGG pathway classification of DEPs.** The x-axis represents pathway annotation entries, and the y-axis represents the number of DEPs enriched for each pathway term.

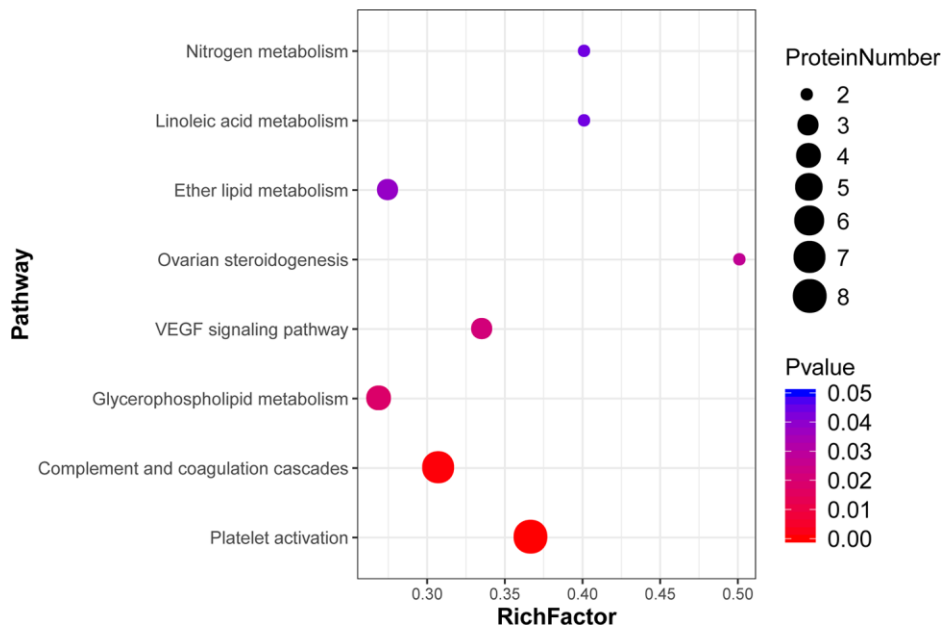

**Figure 8. Top 8 pathways enriched in DEPs from aged skin.** The x-axis indicates the enrichment factor (RichFactor), i.e. the number of DEPs annotated to each pathway divided by all identified proteins annotated to the same pathway. The larger the value, the greater the proportion of DEPs annotated to each pathway. Dot sizes represent the number of DEPs annotated to each pathway.

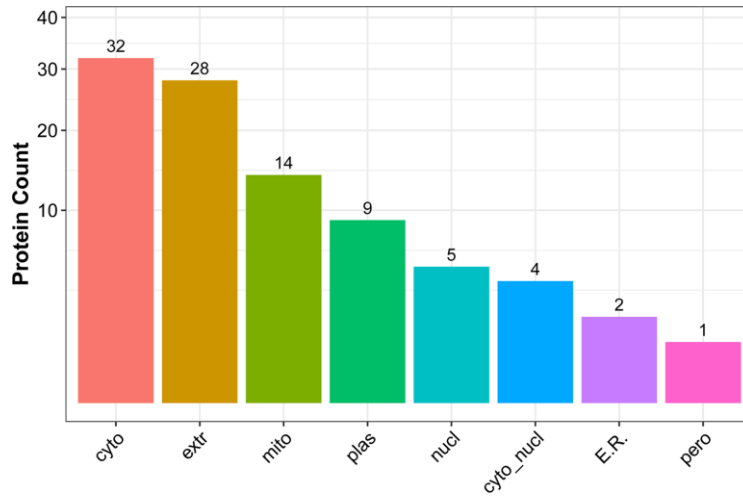

Figure 9. Subcellular localization of DEPs. The x-axis represents subcellular structure entries and the y-axis represents the number of DEPs.

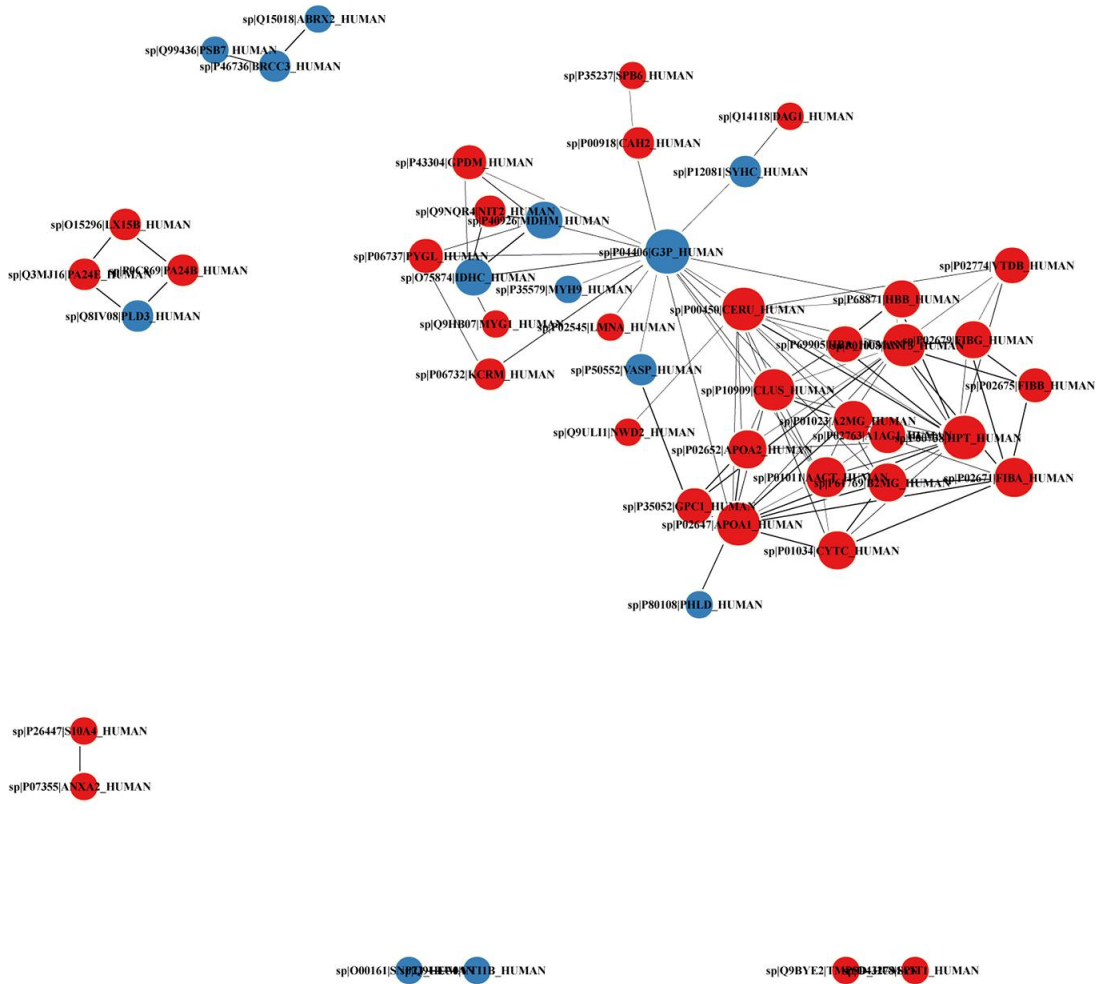

Figure 10. PPI network diagram of DEPs. Red and blue nodes indicate upregulated and downregulated proteins, respectively. The size of the circles indicates node degree.

[6]. Moreover, ROS production may increase secretion of pro-inflammatory cytokines by aging endothelial cells and vascular smooth muscle cells. This leads to sustained vascular inflammation and stimulates the expression of pro-angiogenic factors like VEGF and PDGF- $\beta$  [11]. Due to characteristic weakening of the immune function caused by aging, skin homeostasis is compromised and this favors both local and systemic mild chronic inflammation.

We found that several DEPs upregulated in aged skin are related to coagulation, immunity, and inflammation. Alpha-1-acid glycoprotein1 (ORM1) is a 41-43-kDa glycoprotein involved in the liver acute phase response to inflammation. ORM1 is also one of the most important plasma binding proteins, involved in the transport of several endogenous ligands related to inflammation. In addition, ORM1 can interact with leptin receptors [12], and its expression is regulated by inflammatory mediators such as IL-1 $\beta$ , TNF- $\alpha$ , IL-6, and IL-6-related cytokines [13]. Galectin-3 binding protein (Gal-3BP) is a multifunctional, secreted glycoprotein mainly involved in the inflammatory response and tumor transformation and progression. It can be induced by interferons (IFN- $\alpha$ , IFN- $\beta$ , IFN- $\gamma$ ), TNF- $\alpha$ , and dsRNA/dsDNA [14]. Galectin-3 (LGALS3), a  $\beta$ -galactosidase-binding lectin, is known to promoting cardiac fibrosis, a common event during aging [15]. Alpha-2-macroglobulin ( $\alpha$ 2M), a tetrameric protein also involved in inflammation, can promote the phagocytosis of bacteria, ROS production, and neutrophil chemotaxis and adhesion [16]. It was proposed that  $\alpha$ 2M mRNA levels may serve as a biomarker for aging in fibroblasts grown in lung tissue cultures [17]. Beta-2-microglobulin (B2M) is a component of the class I histocompatibility complex (MHC) and contributes to host's immune response to tumors [18]. The immunoglobulin mu heavy chain protein forms the large subunit of IgM, involved in maintaining antigen specificity [19]. Dermcidin (DCD) is constitutively secreted in the skin, has antimicrobial properties and contributes to defense mechanisms that prevent fungal colonization [20].

Many blood particles and coagulation cascade proteins were identified as DEPs in aged skin. These include hemoglobin, haptoglobin (HP), antithrombin III (SERPINC1), and fibrinogen. A normal adult hemoglobin tetramer is composed of two alpha chains (HBA) and two beta chains (HBB). Hemoglobin mediates oxygen transport and is also an indicator of skin's physiological function [21]. HP is crucial for the elimination of free hemoglobin in the blood and exerts anti-inflammatory and immunomodulatory effects in extravascular tissues [22]. Therefore, upregulation of HP expression may represent a physiological indicator

of aging. SERPINC1 regulates the blood coagulation cascade by inhibiting thrombin and other serine proteases [23]. Fibrinogen is synthesized in the liver and released into the blood, where it acts as a critical coagulation factor. It consists of three pairs of different polypeptide chains: fibrinogen alpha chain (FGA), fibrinogen beta chain (FGB), and fibrinogen gamma chain (FGG). In addition to its hemostatic function, fibrinogen can also bind many other proteins, including fibronectin, albumin, thrombospondin, vascular pseudohemophilia factor (vWF), fibrin, FGF2, VEGF, and IL-1, and affect cell migration and adhesion and inflammatory responses [24].

At present, the "brick wall" model is most commonly used to describe the skin barrier. Keratinocytes and their internal structural proteins form the "brick" of the skin barrier, and skin lipids serve as the "mud." Together they maintain skin stability and rejuvenation. Interestingly, studies on lipid metabolism and aging reported that the lifespan of experimental animals can be extended by manipulating genes involved in lipid synthesis (e.g. lipase overexpression), and even by fat removal. Indeed, it was suggested that blood lipids may be used as biomarkers of human aging [25]. Research showed that high plasma levels of apolipoprotein E (APOE), a protein involved in lipid transport and metabolism, are associated with increased risk of cardiovascular disease and may serve as a marker of human aging [26]. In our study, APOA1 and APOA2 were found to be upregulated in aged skin samples. Studies have shown that APOA1 levels are significantly reduced in acne patients [27]. Therefore, we speculate that these two proteins may be associated with reduced sebum secretion in the elderly, leading to a dry and desquamating phenotype. Other upregulated DEPs included fatty acid elongase 7 (ELOVL7), which participates in the synthesis and extension of very long-chain fatty acids [28], and arachidonate 15-lipoxygenase B (ALOX15B), a key enzyme in the metabolism of polyunsaturated fatty acids. The latter finding deserves further scrutiny, since downregulation of ALOX15B gene expression in light-damaged skin has been reported previously [29].

Phospholipase A2 group IVB (PLA2G4B) and phospholipase A2 group IVE (PLA2G4E) are members of the calcium-dependent phospholipase A2 family, also associated with lipid metabolism. Their role in the lipid signaling network in the skin may be mediated by binding to the phospholipase A2 receptor (PLA2R1) to influence pro-inflammatory signaling, autoimmunity, apoptosis, and aging. In this regard, Griveau et al. [30] reported that PLA2R1 knockdown delayed senescence in progerin-expressing human fibroblasts, and concluded that PLA2R1 mediates key premature aging

phenotypes through a p53/FDPS pathway. In addition, Sukocheva et al. [31] showed that PLA2R1 induces the activation of mitochondrial proteins controlled by Janus kinase 2 (JAK2) and estrogen-related receptor alpha (ERR $\alpha$ ), increasing ROS production and promoting aging. Therefore, upregulation of PLA2G4B and PLA2G4E may contribute to skin aging through lipid metabolism pathways and/or lipid signaling networks.

Various protease inhibitors were also differentially upregulated in aged skin samples. Alpha-1-antichymotrypsin (SERPINA3) is present in senile plaques and accelerates the formation of A $\beta$  fibers associated with Alzheimer's disease (AD) [32]. In addition, SERPINA3 was shown to promote migration and invasion of melanoma cells [33]. Leukocyte elastase inhibitor (LEI/SERPINB1) and SERPINB6 also function as intracellular serine protease inhibitors that protect cells against damage induced by proteases released into the cytoplasm in response to cellular stress [34, 35]. Research showed that high SERPINA3 and SERPINB6 expression is associated with higher levels of amyloidosis in women with AD [36]. Cystatins function as reversible cysteine protease inhibitors that regulate cathepsin activity, autophagy, immune function, and elicit protection against neurodegenerative diseases. Studies have shown that mutations in the CSTA gene encoding Cystatin-A are associated with acral peeling skin syndrome and exfoliative ichthyosis [37]. Consistent with our findings, a study showed that cystatin-A content in the facial skin of the elderly was much higher than in younger people [38]. Meanwhile, cystatin-C expression, which was also upregulated in our aged skin samples, has been linked to brain aging in previous studies [39]. Kunitz-type protease inhibitor 1 (SPINT1), a type II transmembrane serine protease inhibitor, has been shown to be involved in the development of several types of cancer, such as squamous cell carcinoma and colorectal cancer. Of note, alterations in the SPINT1 gene are highly prevalent in skin cutaneous melanoma (SKCM) patients and may promote metastatic invasion [40].

Among the metal-binding proteins found to be upregulated in aged skin was melanotransferrin (MELTF) and ceruloplasmin (CP). Melanotransferrin is a transferrin homolog involved in iron metabolism and transport, whose activity impacts angiogenesis, plasminogen activation, cell migration, and tumorigenesis [41]. Ceruloplasmin (CP) acts as a plasma oxidase and can form stable complexes with many proteins [42]. We also detected upregulation of various signal transduction-related proteins in aged skin, with potential roles in carcinogenesis. Semaphorin 7A (SEMA7A) is highly induced via mTOR signaling by the EGFR pathway. Increased mTOR activity is associated with the aging

process. Activation of mTOR downregulates lysosomal degradation (autophagy), which weakens the removal of damaged organelles, toxic substances, and pathogens [43] [11]. The SEMA7A-integrin  $\beta$ 1 (ITGB1) axis also plays a key role in ERK activation and inhibition of apoptosis [44]. Cell division control protein 42 homolog (CDC42) is a member of a small GTPase family associated with cell cycle control and is dysregulated in a variety of human cancers. It exerts positive regulation of cell proliferation, migration and invasion, angiogenesis, tissue transformation, and tumor growth [45]. The glycoprotein mucin-like protein 1 (MUCL1) is mostly expressed in breast tissue. It stimulates proliferation, has anti-apoptotic actions, is involved in the endoplasmic reticulum stress response, and has prognostic value in breast cancer. Studies have shown that the phosphoinositide 3-kinase/Akt pathway controls MUCL1 expression downstream of HER2. MUCL1 also stimulates focal kinase (FAK) and Jun NH2 terminal kinase (JNK) signaling and c-Jun phosphorylation [46].

ATP6AP2 participates in the assembly of the vacuolar (V)-ATPase proton pump, thereby controlling proteolysis, autophagy, and glycosylation events. Accordingly, missense mutations in ATP6AP2 lead to decreased V-ATPase activity and defects in autophagy and glycosylation [47, 48]. Carboxypeptidase E (CPE) is involved in the biosynthesis of various neuropeptides and hormones in the endocrine and nervous systems, and is associated with hyperinsulinemia and insulinoma [49]. GPD2 (glycerol 3-phosphate dehydrogenase 2) is located in the inner mitochondrial membrane and catalyzes the conversion of cytoplasmic glycerol 3-phosphate (G3P) into dihydroxyacetone phosphate. It is connected to glycolysis, oxidative phosphorylation, and fatty acid metabolism as an intermediate metabolic enzyme for glycerophosphate shuttling. GPD2 can also promote ROS production at the respiratory chain and hence increase oxidative stress [50]. Creatine kinase, M-type (CKM) is a cytoplasmic enzyme that reversibly catalyzes phosphate transfer between ATP and various phosphagens. Accumulation of oxidatively modified (carbonylated) proteins is a hallmark of cellular and tissue aging, and carbonylation of CKM has been reported in previous studies on skeletal muscle aging [51]. Lactate dehydrogenase B (LDHB) was shown to exert transcriptional modulation after cuticle removal in aging skin, suggesting that it may be related to epidermal repair [52]. Glycogen phosphorylase L (PYGL) is associated with degradation of liver glycogen. Studies have shown that hypoxia induces glycogen metabolism with subsequent PYGL upregulation. In turn, PYGL depletion and concomitant glycogen accumulation lead to elevated ROS levels and induction of p53-dependent senescence [53]. Carbonic anhydrase 2 (CA2) and CA6 catalyze reversible

hydration of carbon dioxide, a process related to the regulation of skin pH. In addition, altered CA2 expression has been linked to inflammatory skin diseases [54]. Nitrilase family member 2 (NIT2) has  $\omega$ -amidase activity and possesses inhibiting effects on tumor cell growth [55]. Valosin-containing protein (VCP), a member of the AAA-ATPase family of proteins, plays a key role in ubiquitin-dependent protein degradation, cell cycle, inhibition of apoptosis, and DNA damage response. Skin immunohistochemical studies on patients with amyotrophic lateral sclerosis (ALS) have shown that increased VCP expression correlates with the progression of this neurodegenerative disease [56, 57].

Aged skin samples showed upregulated expression of clusterin (CLU), a chaperone that inhibits both accumulation of elastin in photoaged skin [58] and melanogenesis through MITF/tyrosinase downregulation [59]. These actions may be related to characteristic phenotypes (e.g. reduced elasticity and discoloration) of aging skin. In addition, CLU is associated with lipid transport, apoptosis, tissue remodeling, stress response, inflammatory skin diseases, diabetes, and metabolic syndrome [60]. Chaperonin containing TCP1 subunit 8 (CCT8) is a component of the chaperonin-containing T-complex (TRiC), which regulates telomerase transport and stabilizes telomere extension [61]. Translin (TSN) is a DNA-binding protein that can form multimers with Translin-related factor X (TRAX) and modulates RNA processing and DNA repair. Translin was shown to restrict the proliferation and differentiation of mesenchymal cells [62].

Glypican 1 (GPC1) is associated with control of cell growth, proliferation, and differentiation. A study showed that GPC1 is the predominant GPC isoform in human keratinocytes and its expression decreases significantly with age [63]. This result is contrary to our findings, thus larger sample studies are required. Lamin A/C (LMNA) are structural components of the nuclear lamina and influence chromatin organization and telomere dynamics. Mutations in LMNA can cause diverse pathologies, including Hutchinson-Gilford premature aging syndrome [64]. The function of prolactin induced protein (PIP), another DEP with upregulated expression in aged skin, is not fully clear. PIP is found in a variety of human secretions, has immunoregulatory functions, and is abundantly expressed in human cancers, especially breast cancer, where it exerts tumor-promoting actions [65]. A study showed that PIP can damage the skin barrier and induce keratinocyte proliferation [66]. Annexin A2 (ANXA2) is a member of the annexin family. Its functions include protecting S100A10 from ubiquitination and proteasomal degradation [67]. In addition, studies

suggested that ANXA2 affects fibroblast migration and inhibits keloid fibroblast proliferation [68, 69]. Syndecan binding protein 2 (SDCBP2) binds to phosphatidylinositol 4,5-bisphosphate (PIP2) and may play a role in the organization of nuclear PIP2, cell division, and cell survival [70].

Several other functional proteins were also found to be upregulated in aged skin. GC (vitamin D-binding) protein (GC) is involved in the transport and storage of vitamin D, clearance of extracellular actin, and chemotaxis of neutrophils and macrophages during inflammation [71, 72]. Transmembrane serine protease 13 (TMPRSS13) is a membrane-anchored serine protease with roles in skin development and maintenance of barrier function homeostasis [73]. Ras-related protein Rab-21 (RAB21) is involved in the regulation of cell adhesion and migration, and its overexpression can enhance the production of A $\beta$  [74]. Lipophilin B (SCGB1D2), a member of the secretoglobulin superfamily, is expressed almost specifically in breast tissue and is upregulated in breast cancer and female genital tract tumors [75]. Dystroglycan (DAG1) is a transmembrane protein that connects the extracellular matrix to the cytoskeleton. It is involved in the assembly and maintenance of the basement membrane structure necessary for tissue morphogenesis and signal transmission across the plasma membrane [76]. The functions of WD40 repeat-containing protein SMU1 (SMU1), NACHT and WD repeat domain-containing protein 2 (NWD2), and UPF0160 protein MYG1, mitochondrial (C12orf10) are unclear. SMU1 functions as a DNA replication regulator and spliceosomal factor and is an essential host protein for influenza virus infection [77].

#### ***Down-regulated proteins***

We detected 38 downregulated DEPs in our aged skin samples. Among them were five keratins (KRT15, KRT39, KRT72, KRT35, and KRT82), which is consistent with decreased epidermal barrier function with aging. Besides keratins, actin, proline-rich small protein 1 (SPRR1), S100 proteins, and loricrin are among the best studied skin barrier proteins. Several S100 proteins were downregulated in aged skin. They contain two EF-hand calcium binding motifs and are involved in the regulation of many cellular processes, such as cell cycle progression and differentiation. S100 proteins are one of the components of the cornified envelope (CE) in the skin [78]. Our results found that S100A3 expression decreased with age, whereas S100A4 was upregulated. S100A3 may promote calcium-dependent epidermal cell differentiation, leading to hair shaft and hair cuticular barrier formation [79]. Decreased expression of S100A3 in the aging epidermis also reflects weakening of its barrier function.

Extracellular matrix protein 1 (ECM1) supports the structure and function of human skin. In the epidermis, ECM1 affects the proliferation and differentiation of keratinocytes. In the dermis, ECM1 binds to perlecan, type IV collagen, and laminin 332 and acts as a “biogel” helping to assemble and combine the basement membrane and dermal interstitium [80]. ECM1 participates in various pathological and physiological skin processes, including scar formation and aging. ECM1 is also involved in the excessive angiogenesis and vasodilation observed in psoriasis [81]. Research has shown that ECM1 expression in human skin decreases with age and increases with UV exposure, although the underlying mechanisms and effects remain controversial [82].

Interestingly, all the DEPs with vesicle trafficking functions identified in this study were downregulated with age. These included synaptosomal-associated protein 23 (SNAP-23), synaptic vesicle membrane protein VAT-1 homolog (VAT-1), vesicle transport through interaction with t-SNAREs homolog 1B (VTI1B), and AP-2 complex subunit mu (AP2M1). SNAP-23 regulates the exocytosis of various inflammatory mediators by mast cells [83]. VAT-1 positively regulates calcium-dependent keratinocyte activation during epidermal repair [84]. VTI1B, syntaxin 8, syntaxin 7, and endobrevin/VAMP-8 form a SNARE complex involved in fusion of late endosomes in vitro. Progressive neurodegeneration was observed in the peripheral ganglia of Vti1b-deficient mice [85, 86]. A recent quantitative proteomics analysis study found that AP2M1 is involved in the transmission of secretory signals produced by senescent cells. This property may be related to the cdk4-EZH2-AP2M1 pathway that regulates the mechanism of senescence escape [87].

Other skin DEPs downregulated with age participate in cell proliferation, differentiation, and apoptosis. Rap1A, a member of the Ras oncogene family, is a small G protein involved in cell differentiation. Studies have shown that Rap1A regulates osteoblast differentiation through ERK/p38 signaling and promotes the transformation of epithelium to mesenchyme through the AKT signaling pathway [88, 89]. BRISC complex subunit Abraxas 2 (ABRAXAS2) functions as a central scaffold protein that assembles various components of the BRISC complex and retains it in the cytoplasm. It also regulates BRCA1 localization to damaged DNA sites [90]. Apoptosis-inducing factor, mitochondria-associated 1 (AIFM1) is a NADH oxidoreductase that acts as a pro-apoptotic factor following release from the mitochondria [91]. Barrier-to-autointegration factor 1 (BANF1) is involved in the upregulation of keratinocyte proliferation in psoriatic lesions [92].

Other downregulated DEPs included enzymes related to biosynthesis and metabolism. Among these, glyceraldehyde 3-phosphate dehydrogenase (GAPDH) was the most interconnected (hub) node in our PPI analysis. GAPDH is a key enzyme in anaerobic glycolysis and its activity influences many processes, including carbohydrate metabolism, apoptosis, autophagy, vesicle trafficking, nuclear membrane fusion, signal transduction, transcriptional regulation, and telomere stability and maintenance [93–96]. Dysregulated GAPDH expression has been associated with cancer, neurodegenerative diseases, metabolic syndrome, and inflammation [93, 97, 98]. The increase in GAPDH transcription during hypoxia is mediated by upregulation of hypoxia-inducible factor 1 (HIF-1). The HIF-1 pathway activates genes that promote survival during hypoxia, thereby extending lifespan [99]. Therefore, GAPDH downregulation in aging skin may reflect decreased glycolytic capacity and reduced rejuvenation ability upon activation of the HIF-1 signaling pathway.

Hypoxanthine phosphoribosyltransferase 1 (HPRT1) plays a key role in purine nucleotide production through the purine rescue pathway [100]. Malate dehydrogenase, mitochondrial (MDH2) catalyzes the reversible oxidation of malate to oxaloacetate in the tricarboxylic acid (TCA) cycle to provide energy to the cells [101]. Isocitrate dehydrogenase 1 (IDH1) catalyzes the oxidative decarboxylation of isocitrate to 2-oxoglutaric acid. IDH1 expression dysregulation is observed in many cancer types, and a decrease in IDH1 expression is highly correlated with the pathogenesis of early skin tumors [102].

Heat shock protein family E (Hsp10) Member 1 (HSPE1) has chaperone function and complexes with Hsp60 to assist protein folding in the mitochondrial matrix [103]. Proteasome 20S subunit alpha 5 (PSMA5) and proteasome 20S subunit beta 7 (PSMB7) are components of the 20S proteasome complex, involved in the proteolytic degradation of most intracellular proteins. The 26S proteasome formed when the complex is associated with two 19S regulatory particles can hydrolyze misfolded or damaged proteins [104]. Consistent with our findings, a study reported age-related decrease in proteasome activity in dermal fibroblasts [105].

Other DEPs downregulated in aged skin included copper homeostasis protein cutC homolog (CUTC), a shuttle protein that along with CP helps maintain copper homeostasis and is essential for energy generation, ROS removal, coagulation, and connective tissue cross-linking [106]; endoplasmic reticulum metalloproteinase 1 (ERMP1), related to the unfolded protein response and

oxidative stress defense [107], and fumarylacetoacetate hydrolase (FAH), an essential enzyme in metabolic pathways that degrade aromatic compounds [108]. Glycosylphosphatidylinositol-specific phospholipase D1 (GPLD1) hydrolyzes inositol phosphate bonds in proteins anchored by phosphatidylinositol (GPI-anchor), thereby releasing the anchor protein from the membrane. GPI anchoring protein expression is essential for proper skin differentiation and maintenance [109]. Phospholipase D3 (PLD3) is a member of the PLD superfamily, catalyzing the hydrolysis of membrane phospholipids. PLD3 participates in the sorting of endosomal proteins and regulates APP processing [110, 111]. Overexpression of PLD3 leads to a significant reduction of intracellular amyloid  $\beta$  precursors, which can reduce the risk of Alzheimer's disease [112]. Therefore, we consider PLD3 as a negative regulator of the aging process.

Several cytoskeleton-related proteins were also differentially downregulated in aged skin. Echinoderm microtubule-associated protein-like 4 (EMAL4) stabilizes microtubules [113]. Myosin heavy chain 9 (MYH9) promotes cytoskeletal reorganization during cell spreading [114]. Vasodilator-stimulated phosphoprotein (VASP) is a member of the actin regulatory Ena/VASP protein family, which mediates actin filament elongation and regulates fibroblast migration. In addition, VASP is necessary for PKA-mediated platelet aggregation inhibition [115]. Other downregulated DEPs are involved in post-transcriptional regulation of gene expression. Both histidyl-tRNA synthetase (HARS) and HARS2 are members of the aminoacyl tRNA synthetase (ARS) family that attaches specific amino acids to their related tRNA molecules during protein synthesis [116]. Argonaute RISC component 1 (AGO1) binds to miRNAs in the RISC complex to mediate post-transcriptional gene silencing [117].

The functions of other DEPs found to be downregulated in aged skin are less clear. For example, V-set and immunoglobulin domain-containing 8 (VSIG8) may regulate hair follicle keratinization and hair stem differentiation [118, 119]. Potassium channel tetramerization domain-containing 1 (KCTD1) negatively regulates the AP-2 family of transcription factors and promotes adipogenesis [120]. Mice deficient in solute carrier family 12 member 6 (SLC12A6) showed motor dysfunction, peripheral neuropathy, and sensory motor gating defects [121]. Other poorly characterized proteins included acid phosphatase type-7 (ACP7), a metallohydrolase, and BRCA1/BRCA2-containing complex subunit 3 (BRCC3), a component of the BRCC complex with E3 ubiquitin ligase activity.

The results of our differential protein expression analysis in young vs aging skin may allow distinction

between "young factors", i.e. proteins involved in angiogenesis, vesicle transport, skin barrier structure, cell proliferation and differentiation, and "aging factors", i.e. proteins related to chronic inflammation, oxidative stress, DNA damage, mitochondrial dysfunction, and signal transduction. Several of the DEPs identified in aged skin are associated to chronic inflammation, an important factor leading to skin aging, while others are related to the development of cancer or AD. Among the 95 DEPs identified, some had already been linked to skin rejuvenation or aging. For other DEPs, age-related expression was proved in other tissues and organs, but had not yet been demonstrated in skin tissue. In turn, and to the best of our knowledge, many other DEPs identified herein had not previously been related to aging. Therefore, this proteomics study provides reference proteins for future research on skin aging and may help develop treatments for age-related skin conditions and rejuvenation.

## MATERIALS AND METHODS

### Study participants

Twenty healthy Chinese volunteers participated in the study. Mean age was  $26.4 \pm 3.06$  years (range 20-35 years) in the youth group (control) and  $59.9 \pm 6.24$  years (range 50-75 years) in the elderly group. Age grouping was not influenced by gender distribution, as determined by Fisher's exact probability method test ( $P = 0.370$ ). The inclusion criterion was to have well preserved skin integrity at the sampling site. Donors with skin disease, other systemic diseases, or who experienced allergic reactions to the skin sampling tape were excluded from the study. No humectants or other cosmetics were used on the day of the experiment. The study followed the recommendations of the Medical Ethics Committee of Anhui Medical University, and all subjects provided informed consent.

### Reagents, supplies, and equipment

Sodium dodecyl sulfate (SDS), polyacrylamide, SDS-free L3 lysate, ethylenediamine tetraacetic acid (EDTA), dithiothreitol (DTT), Coomassie brilliant blue G-250, 40% ethanol, 10% acetic acid, acrylonitrile (ACN), and trypsin(Hualishi Scientific, Beijing, China). Empore™ C18 47 mm extraction discs (Model 2215), Pierce C18 tips (10  $\mu$ l bed), Thermomixer (MS-100), CentriVap vacuum concentrator, and related accessories were obtained from Thermo Fisher Scientific (Shanghai, China). Ultrafiltration membranes (10K MWCO, 1.5 ml, flat sheet) were obtained from Pall Corp. (NY, USA). A Q Exactive HF mass spectrometer and an UltiMate 3000 HPLC system (Thermo Fisher Scientific, San Jose, CA, USA) were used for sample analyses.

## Sample preparation

Stratum corneum samples from the volar forearm skin were collected using 3M medical tape. To this end, the sampling area was gently cleaned with a sterile cotton ball, the tape was applied onto the skin, and uniform pressure was applied intermittently for 1 min before tape removal. Five collections were sequentially performed at the same location. To minimize variability, in all cases the procedure was carried out by the same technician.

## Protein extraction, quality control, enzymolysis

Protein extraction was performed as follows: (1) tape-skin samples were cut into small pieces (0.5 x 0.5 cm) with a sterile blade and deposited inside a glass plate prior to transfer to a 1.5 ml centrifuge tube; (2) Add appropriate amount of lysis buffer without SDS to the sample, add 2mM EDTA, 1XCocktail, and place on ice for 5 minutes. Then, 10 mM DTT were added and samples were left to soak overnight; (3) following centrifugation at 25,000g, 4 °C for 15 min, the supernatants were recovered and treated with 10 mM DTT on a 56 °C bath for 1 h; (4) samples were then treated with 55 mM IAM, incubated at RT in the dark for 45 min, and centrifuged at 25,000g, 4 °C for 15 min to obtain the final protein solution in the resulting supernatant. Protein concentrations were next measured using the Bradford assay [122], and the purity of the extracted proteins was verified by SDS-PAGE on 12% gels followed by Coomassie blue staining. For proteolysis, 100 µg of protein/sample was hydrolyzed over 4 h at 37 °C in 2.5 µg of Trypsin (protein: enzyme ratio = 40: 1). Trypsin was then added again at the same ratio, and enzymolysis continued at 37 °C for another 8 h. The hydrolyzed peptides were next desalted using a Strata X column and dried under vacuum.

## High pH reverse-phase separation.

All samples were mixed equally (10µg/sample), and 200µg sample was diluted with 2 mL buffer A (5% ACN, pH 9.8) and injected onto a Shimadzu LC-20AB liquid phase system. A 5 µm, 4.6 x 250 mm Gemini C18 column was used for liquid phase separation of samples. Gradient elution was applied at a flow rate of 1 mL/min: 5% buffer B (95% ACN, pH 9.8) for 10 min, 5% to 35% buffer B for 40 min, and 35% to 95% buffer B for 1 min. Phase B lasted 3 min and 5% buffer B was equilibrated for 10 min. The elution peak was monitored at a wavelength of 214 nm and one component was collected every minute. The sample was combined with the elution peak of the chromatogram to obtain 10 components, and then freeze-dried.

## Data-dependent and data-independent acquisition (DDA and DIA) analysis

The dried peptide sample was re-dissolved with buffer A (2% ACN, 0.1% FA), centrifuged at 20,000 g for 10 min, and the supernatant was injected. Separation was performed on a Thermo Corporation UltiMate 3000 UHPLC. The sample first entered a trap column for enrichment and desalting. Then the sample was connected in series with a self-packed C18 column (150 µm inner diameter, 1.8 µm column diameter, 25 cm column length). Peptides were separated at a flow rate of 500 nL/min through the following effective gradient: 0-5 min, 5% buffer B (98% ACN, 0.1% FA); 5-160 min, 5% to 35% buffer B; 160-170 min, 35% to 80% buffer B; 170-175 min, 80% buffer B; 176-180 min, 5% buffer B. The nanoliter liquid separation end is directly connected to the mass spectrometer. The peptides separated by liquid phase were sprayed into the nanoESI source and then entered a Q-Exactive HF tandem mass spectrometer for DDA and DIA analysis. DDA MS parameters were set to: (1) MS: 350–1,500 scan range (m/z); 60,000 resolution; 3e6 AGC target; 50 ms maximum injection time (MIT); 30 loop count; NCE 28; (2) HCD-MS/MS: 15,000 resolution; 1e5 AGC target; 100 ms MIT; charge exclusion, exclude 1, 7, 8, >8; filter dynamic exclusion duration 30 s; 2.0 m/z isolation window. The same nano-LC system and gradient are used for DIA analysis. DIA MS parameters were set to: (1) MS: 350–1,500 scan range (m/z); 20 ppm MS tolerance; 120,000 resolution; 3e6 AGC target; 50 ms MIT; 50 loop count; (2) HCD-MS/MS: 1.7 m/z isolation window; 30,000 resolution; 1e5 AGC target; automatic MIT; 50 loop count; filter dynamic exclusion duration 30s; stepped NCE: 22.5, 25, 27.5.

## Data analysis

DDA data were identified using MaxQuant (version 1.5.3.30) [123]. Peptide/protein entries that satisfied FDR ≤ 1% were used to build the final spectral library. Data was reviewed according to the UniProtKB/Swiss-Prot H. sapiens proteome database. Parameters were selected as follows: (i) Enzyme: Trypsin; (ii) Minimal peptide length: 7; (iii) PSM-level FDR and Protein FDR: 0.01; (iv) Fixed modifications: Carbamidomethyl (C); (v) Variable modifications: Oxidation (M); Acetyl (Protein N-term). DIA data was analyzed using Spectronaut [124], which uses iRT peptides to calibrate retention time. FDR was estimated using the mProphet scoring algorithm, which accurately reflects the matching degree of ion pairs. Then, based on the Target-decoy model applicable to SWATH-MS, the false positive control is completed with FDR not exceeding 1%. MSstats [125] screened DEPs according to a difference multiple ≥ 1.5 and P < 0.05 as the criteria



for determining significant difference. The mass spectrometry proteomics data have been deposited to the ProteomeXchange Consortium via the PRIDE partner repository with the dataset identifier PXD018430.

## AUTHOR CONTRIBUTIONS

All authors participated in the study design and data interpretation. MTL, YCW, CX, JM, HZ, SRC conducted experiments. JM, HZ, SRC and XDZ conducted data analysis. SY, FLX and XJZ designed experimental strategies and guided the research. The paper was written by JM and approved by all authors.

## ACKNOWLEDGMENTS

We thank The First Affiliated Hospital, Key Laboratory of Dermatology, Anhui Medical University for continued support of this research. We would also like to thank BGI for the technical support provided.

## CONFLICTS OF INTEREST

The authors declare that they have no conflicts of interest.

## FUNDING

The study was supported by a grant from the Science and Technology Action Plans for the Prevention and Treatment of Major Diseases sponsored by National Health and Family Planning Commission of the People's Republic of China (grant no. 2017ZX-01E-002).

## REFERENCES

1. Rinnerthaler M, Streubel MK, Bischof J, Richter K. Skin aging, gene expression and calcium. *Exp Gerontol*. 2015; 68:59–65. <https://doi.org/10.1016/j.exger.2014.09.015> PMID:25262846
2. Ribero S, Mangino M, Bataille V. Skin phenotypes can offer some insight about the association between telomere length and cancer susceptibility. *Med Hypotheses*. 2016; 97:7–10. <https://doi.org/10.1016/j.mehy.2016.10.010> PMID:27876133
3. Avantiaggiato A, Bertuzzi G, Vitiello U, Iannucci G, Pasin M, Pascali M, Cervelli V, Carinci F. Role of antioxidants in dermal aging: an in vitro study by q-RT-PCR. *Aesthetic Plast Surg*. 2014; 38:1011–16. <https://doi.org/10.1007/s00266-014-0380-9> PMID:25028117

4. Kammeyer A, Luiten RM. Oxidation events and skin aging. *Ageing Res Rev*. 2015; 21:16–29. <https://doi.org/10.1016/j.arr.2015.01.001> PMID:25653189
5. Choi YJ, Moon KM, Chung KW, Jeong JW, Park D, Kim DH, Yu BP, Chung HY. The underlying mechanism of proinflammatory NF- $\kappa$ B activation by the mTORC2/Akt/IKK $\alpha$  pathway during skin aging. *Oncotarget*. 2016; 7:52685–94. <https://doi.org/10.18632/oncotarget.10943> PMID:27486771
6. Zhuang Y, Lyga J. Inflammaging in skin and other tissues - the roles of complement system and macrophage. *Inflamm Allergy Drug Targets*. 2014; 13:153–61. <https://doi.org/10.2174/1871528113666140522112003> PMID:24853681
7. Yan W, Zhang LL, Yan L, Zhang F, Yin NB, Lin HB, Huang CY, Wang L, Yu J, Wang DM, Zhao ZM. Transcriptome analysis of skin photoaging in chinese females reveals the involvement of skin homeostasis and metabolic changes. *PLoS One*. 2013; 8:e61946. <https://doi.org/10.1371/journal.pone.0061946> PMID:23637934
8. Robinson MK, Binder RL, Griffiths CE. Genomic-driven insights into changes in aging skin. *J Drugs Dermatol*. 2009; 8:s8–11. PMID:19623778
9. Shannon P, Markiel A, Ozier O, Baliga NS, Wang JT, Ramage D, Amin N, Schwikowski B, Ideker T. Cytoscape: a software environment for integrated models of biomolecular interaction networks. *Genome Res*. 2003; 13:2498–504. <https://doi.org/10.1101/gr.1239303> PMID:14597658
10. Naylor EC, Watson RE, Sherratt MJ. Molecular aspects of skin ageing. *Maturitas*. 2011; 69:249–56. <https://doi.org/10.1016/j.maturitas.2011.04.011> PMID:21612880
11. de Almeida AJ, Ribeiro TP, de Medeiros IA. Aging: molecular pathways and implications on the cardiovascular system. *Oxid Med Cell Longev*. 2017; 2017:7941563. <https://doi.org/10.1155/2017/7941563> PMID:28874954
12. Cecilian F, Lecchi C. The immune functions of  $\alpha_1$  acid glycoprotein. *Curr Protein Pept Sci*. 2019; 20:505–24. <https://doi.org/10.2174/1389203720666190405101138> PMID:30950347
13. Fournier T, Medjoubi-N N, Porquet D. Alpha-1-acid glycoprotein. *Biochim Biophys Acta*. 2000; 1482:157–71.

- [https://doi.org/10.1016/s0167-4838\(00\)00153-9](https://doi.org/10.1016/s0167-4838(00)00153-9)  
PMID:[11058758](https://pubmed.ncbi.nlm.nih.gov/11058758/)
14. Loimaranta V, Hepojoki J, Laaksoaho O, Pulliainen AT. Galectin-3-binding protein: a multitask glycoprotein with innate immunity functions in viral and bacterial infections. *J Leukoc Biol.* 2018; 104:777–86.  
<https://doi.org/10.1002/JLB.3VMR0118-036R>  
PMID:[29882603](https://pubmed.ncbi.nlm.nih.gov/29882603/)
15. Ito T, Hanahata Y, Kine K, Murakami S, Schaffer SW. Tissue taurine depletion induces profibrotic pattern of gene expression and causes aging-related cardiac fibrosis in heart in mice. *Biol Pharm Bull.* 2018; 41:1561–66.  
<https://doi.org/10.1248/bpb.b18-00217>  
PMID:[30270325](https://pubmed.ncbi.nlm.nih.gov/30270325/)
16. Dalli J, Norling LV, Montero-Melendez T, Federici Canova D, Lashin H, Pavlov AM, Sukhorukov GB, Hinds CJ, Perretti M. Microparticle alpha-2-macroglobulin enhances pro-resolving responses and promotes survival in sepsis. *EMBO Mol Med.* 2014; 6:27–42.  
<https://doi.org/10.1002/emmm.201303503>  
PMID:[24357647](https://pubmed.ncbi.nlm.nih.gov/24357647/)
17. Ma H, Li R, Zhang Z, Tong T. mRNA level of alpha-2-macroglobulin as an aging biomarker of human fibroblasts in culture. *Exp Gerontol.* 2004; 39:415–21.  
<https://doi.org/10.1016/j.exger.2003.11.012>  
PMID:[15036401](https://pubmed.ncbi.nlm.nih.gov/15036401/)
18. Yeon Yeon S, Jung SH, Jo YS, Choi EJ, Kim MS, Chung YJ, Lee SH. Immune checkpoint blockade resistance-related B2M hotspot mutations in microsatellite-unstable colorectal carcinoma. *Pathol Res Pract.* 2019; 215:209–14.  
<https://doi.org/10.1016/j.prp.2018.11.014>  
PMID:[30503610](https://pubmed.ncbi.nlm.nih.gov/30503610/)
19. Schroeder HW Jr, Cavacini L. Structure and function of immunoglobulins. *J Allergy Clin Immunol.* 2010; 125:S41–52.  
<https://doi.org/10.1016/j.jaci.2009.09.046>  
PMID:[20176268](https://pubmed.ncbi.nlm.nih.gov/20176268/)
20. Arai S, Yoshino T, Fujimura T, Maruyama S, Nakano T, Mukuno A, Sato N, Katsuoka K. Mycostatic effect of recombinant dermcidin against trichophyton rubrum and reduced dermcidin expression in the sweat of tinea pedis patients. *J Dermatol.* 2015; 42:70–76.  
<https://doi.org/10.1111/1346-8138.12664>  
PMID:[25384912](https://pubmed.ncbi.nlm.nih.gov/25384912/)
21. Cannarozzo G, Bonciani D, Tamburi F, Mazzilli S, Garofalo V, Del Duca E, Sannino M, Zingoni T, Nisticò SP. New insight in noninvasive rejuvenation: the role of a rhodamine-intense pulsed light system. *Photobiomodul Photomed Laser Surg.* 2019; 37:539–43.  
<https://doi.org/10.1089/photob.2019.4626>  
PMID:[31381488](https://pubmed.ncbi.nlm.nih.gov/31381488/)
22. Napolioni V, Gianni P, Carpi FM, Concetti F, Lucarini N. Haptoglobin (HP) polymorphisms and human longevity: a cross-sectional association study in a central Italy population. *Clin Chim Acta.* 2011; 412:574–77.  
<https://doi.org/10.1016/j.cca.2010.12.006>  
PMID:[21147083](https://pubmed.ncbi.nlm.nih.gov/21147083/)
23. Ranucci M. Antithrombin III. Key factor in extracorporeal circulation. *Minerva Anesthesiol.* 2002; 68:454–57.  
PMID:[12029263](https://pubmed.ncbi.nlm.nih.gov/12029263/)
24. Weisel JW. Fibrinogen and fibrin. *Adv Protein Chem.* 2005; 70:247–99.  
[https://doi.org/10.1016/S0065-3233\(05\)70008-5](https://doi.org/10.1016/S0065-3233(05)70008-5)  
PMID:[15837518](https://pubmed.ncbi.nlm.nih.gov/15837518/)
25. Johnson AA, Stolzing A. The role of lipid metabolism in aging, lifespan regulation, and age-related disease. *Aging Cell.* 2019; 18:e13048.  
<https://doi.org/10.1111/accel.13048>  
PMID:[31560163](https://pubmed.ncbi.nlm.nih.gov/31560163/)
26. Mooijaart SP, Berbée JF, van Heemst D, Havekes LM, de Craen AJ, Slagboom PE, Rensen PC, Westendorp RG. ApoE plasma levels and risk of cardiovascular mortality in old age. *PLoS Med.* 2006; 3:e176.  
<https://doi.org/10.1371/journal.pmed.0030176>  
PMID:[16671834](https://pubmed.ncbi.nlm.nih.gov/16671834/)
27. Bakry OA, El Shazly RM, El Farargy SM, Kotb D. Role of hormones and blood lipids in the pathogenesis of acne vulgaris in non-obese, non-hirsute females. *Indian Dermatol Online J.* 2014 (Suppl 1); 5:S9–16.  
<https://doi.org/10.4103/2229-5178.144506>  
PMID:[25506579](https://pubmed.ncbi.nlm.nih.gov/25506579/)
28. Chen S, Hu Z, He H, Liu X. Fatty acid elongase7 is regulated via SP1 and is involved in lipid accumulation in bovine mammary epithelial cells. *J Cell Physiol.* 2018; 233:4715–25.  
<https://doi.org/10.1002/jcp.26255>  
PMID:[29115671](https://pubmed.ncbi.nlm.nih.gov/29115671/)
29. Cho BA, Yoo SK, Seo JS. Signatures of photo-aging and intrinsic aging in skin were revealed by transcriptome network analysis. *Aging (Albany NY).* 2018; 10:1609–26.  
<https://doi.org/10.18632/aging.101496>  
PMID:[30021930](https://pubmed.ncbi.nlm.nih.gov/30021930/)
30. Griveau A, Wiel C, Le Calvé B, Ziegler DV, Djebali S, Warnier M, Martin N, Marvel J, Vindrieux D, Bergo MO, Bernard D. Targeting the phospholipase A2 receptor ameliorates premature aging phenotypes. *Aging Cell.* 2018; 17:e12835.  
<https://doi.org/10.1111/accel.12835> PMID:[30216637](https://pubmed.ncbi.nlm.nih.gov/30216637/)

31. Sukocheva O, Menschikowski M, Hagelgans A, Yarla NS, Siegert G, Reddanna P, Bishayee A. Current insights into functions of phospholipase A2 receptor in normal and cancer cells: more questions than answers. *Semin Cancer Biol.* 2019; 56:116–27.  
<https://doi.org/10.1016/j.semcancer.2017.11.002>  
PMID:[29104026](https://pubmed.ncbi.nlm.nih.gov/29104026/)
32. Talbot C, Houlden H, Craddock N, Crook R, Hutton M, Lendon C, Prihar G, Morris JC, Hardy J, Goate A. Polymorphism in AACT gene may lower age of onset of alzheimer’s disease. *Neuroreport.* 1996; 7:534–36.  
<https://doi.org/10.1097/00001756-199601310-00038>  
PMID:[8730823](https://pubmed.ncbi.nlm.nih.gov/8730823/)
33. Zhou J, Cheng Y, Tang L, Martinka M, Kalia S. Up-regulation of SERPINA3 correlates with high mortality of melanoma patients and increased migration and invasion of cancer cells. *Oncotarget.* 2017; 8:18712–25.  
<https://doi.org/10.18632/oncotarget.9409>  
PMID:[27213583](https://pubmed.ncbi.nlm.nih.gov/27213583/)
34. Strik MC, Wolbink A, Wouters D, Bladergroen BA, Verlaan AR, van Houdt IS, Hijlkema S, Hack CE, Kummer JA. Intracellular serpin SERPINB6 (PI6) is abundantly expressed by human mast cells and forms complexes with beta-tryptase monomers. *Blood.* 2004; 103:2710–17.  
<https://doi.org/10.1182/blood-2003-08-2981>  
PMID:[14670919](https://pubmed.ncbi.nlm.nih.gov/14670919/)
35. Torriglia A, Martin E, Jaadane I. The hidden side of SERPINB1/leukocyte elastase inhibitor. *Semin Cell Dev Biol.* 2017; 62:178–86.  
<https://doi.org/10.1016/j.semcd.2016.07.010>  
PMID:[27422329](https://pubmed.ncbi.nlm.nih.gov/27422329/)
36. Deming Y, Dumitrescu L, Barnes LL, Thambisetty M, Kunkle B, Gifford KA, Bush WS, Chibnik LB, Mukherjee S, De Jager PL, Kukull W, Huentelman M, Crane PK, et al. Alzheimer’s Disease Neuroimaging Initiative (ADNI), and Alzheimer Disease Genetics Consortium (ADGC). Sex-specific genetic predictors of alzheimer’s disease biomarkers. *Acta Neuropathol.* 2018; 136:857–72.  
<https://doi.org/10.1007/s00401-018-1881-4>  
PMID:[29967939](https://pubmed.ncbi.nlm.nih.gov/29967939/)
37. Muttardi K, Nitou D, Kelsell DP, O’Toole EA, Batta K. Acral peeling skin syndrome associated with a novel CSTA gene mutation. *Clin Exp Dermatol.* 2016; 41:394–98.  
<https://doi.org/10.1111/ced.12777>  
PMID:[26684698](https://pubmed.ncbi.nlm.nih.gov/26684698/)
38. Tezuka T, Qing J, Saheki M, Kusuda S, Takahashi M. Terminal differentiation of facial epidermis of the aged: immunohistochemical studies. *Dermatology.* 1994; 188:21–24.  
<https://doi.org/10.1159/000247079>  
PMID:[8305750](https://pubmed.ncbi.nlm.nih.gov/8305750/)
39. Mathews PM, Levy E. Cystatin C in aging and in alzheimer’s disease. *Ageing Res Rev.* 2016; 32:38–50.  
<https://doi.org/10.1016/j.arr.2016.06.003>  
PMID:[27333827](https://pubmed.ncbi.nlm.nih.gov/27333827/)
40. Gómez-Abenza E, Ibáñez-Molero S, García-Moreno D, Fuentes I, Zon LI, Mione MC, Cayuela ML, Gabellini C, Mulero V. Zebrafish modeling reveals that SPINT1 regulates the aggressiveness of skin cutaneous melanoma and its crosstalk with tumor immune microenvironment. *J Exp Clin Cancer Res.* 2019; 38:405.  
<https://doi.org/10.1186/s13046-019-1389-3>  
PMID:[31519199](https://pubmed.ncbi.nlm.nih.gov/31519199/)
41. Suryo Rahmanto Y, Bal S, Loh KH, Yu Y, Richardson DR. Melanotransferrin: search for a function. *Biochim Biophys Acta.* 2012; 1820:237–43.  
<https://doi.org/10.1016/j.bbagen.2011.09.003>  
PMID:[21933697](https://pubmed.ncbi.nlm.nih.gov/21933697/)
42. Vasilyev VB. Looking for a partner: ceruloplasmin in protein-protein interactions. *Biometals.* 2019; 32:195–210.  
<https://doi.org/10.1007/s10534-019-00189-1>  
PMID:[30895493](https://pubmed.ncbi.nlm.nih.gov/30895493/)
43. Lee J, Giordano S, Zhang J. Autophagy, mitochondria and oxidative stress: cross-talk and redox signalling. *Biochem J.* 2012; 441:523–40.  
<https://doi.org/10.1042/BJ20111451>  
PMID:[22187934](https://pubmed.ncbi.nlm.nih.gov/22187934/)
44. Kinehara Y, Nagatomo I, Koyama S, Ito D, Nojima S, Kurebayashi R, Nakanishi Y, Suga Y, Nishijima-Futami Y, Osa A, Nakatani T, Kato Y, Nishide M, et al. Semaphorin 7A promotes EGFR-TKI resistance in EGFR mutant lung adenocarcinoma cells. *JCI Insight.* 2018; 3:e123093.  
<https://doi.org/10.1172/jci.insight.123093>  
PMID:[30568033](https://pubmed.ncbi.nlm.nih.gov/30568033/)
45. Maldonado MD, Dharmawardhane S. Targeting rac and Cdc42 GTPases in cancer. *Cancer Res.* 2018; 78:3101–11.  
<https://doi.org/10.1158/0008-5472.CAN-18-0619>  
PMID:[29858187](https://pubmed.ncbi.nlm.nih.gov/29858187/)
46. Conley SJ, Bosco EE, Tice DA, Hollingsworth RE, Herbst R, Xiao Z. HER2 drives mucin-like 1 to control proliferation in breast cancer cells. *Oncogene.* 2016; 35:4225–34.  
<https://doi.org/10.1038/onc.2015.487>  
PMID:[26725324](https://pubmed.ncbi.nlm.nih.gov/26725324/)
47. Rujano MA, Cannata Serio M, Panasyuk G, Péanne R, Reunert J, Rymen D, Hauser V, Park JH, Freisinger P, Souche E, Guida MC, Maier EM, Wada Y, et al. Mutations in the x-linked ATP6AP2 cause a glycosylation disorder with autophagic defects. *J Exp Med.* 2017; 214:3707–29.

- <https://doi.org/10.1084/jem.20170453>  
PMID:29127204
48. Aleksiejczuk M, Gromotowicz-Poplawska A, Marcinczyk N, Przyłipiak A, Chabielska E. The expression of the renin-angiotensin-aldosterone system in the skin and its effects on skin physiology and pathophysiology. *J Physiol Pharmacol*. 2019; 70.  
<https://doi.org/10.26402/jpp.2019.3.01>  
PMID:31539880
49. Ji L, Wu HT, Qin XY, Lan R. Dissecting carboxypeptidase E: properties, functions and pathophysiological roles in disease. *Endocr Connect*. 2017; 6:R18–38.  
<https://doi.org/10.1530/EC-17-0020>  
PMID:28348001
50. Mráček T, Drahota Z, Houšťek J. The function and the role of the mitochondrial glycerol-3-phosphate dehydrogenase in mammalian tissues. *Biochim Biophys Acta*. 2013; 1827:401–10.  
<https://doi.org/10.1016/j.bbabi.2012.11.014>  
PMID:23220394
51. Lourenço Dos Santos S, Baraibar MA, Lundberg S, Eeg-Olofsson O, Larsson L, Friguet B. Oxidative proteome alterations during skeletal muscle ageing. *Redox Biol*. 2015; 5:267–74.  
<https://doi.org/10.1016/j.redox.2015.05.006>  
PMID:26073261
52. Sextius P, Marionnet C, Tacheau C, Bon FX, Bastien P, Mauviel A, Bernard BA, Bernerd F, Dubertret L. Analysis of gene expression dynamics revealed delayed and abnormal epidermal repair process in aged compared to young skin. *Arch Dermatol Res*. 2015; 307:351–64.  
<https://doi.org/10.1007/s00403-015-1551-5>  
PMID:25740152
53. Favaro E, Bensaad K, Chong MG, Tennant DA, Ferguson DJ, Snell C, Steers G, Turley H, Li JL, Günther UL, Buffa FM, McIntyre A, Harris AL. Glucose utilization via glycogen phosphorylase sustains proliferation and prevents premature senescence in cancer cells. *Cell Metab*. 2012; 16:751–64.  
<https://doi.org/10.1016/j.cmet.2012.10.017>  
PMID:23177934
54. Suri BK, Verma NK, Schmidtchen A. Toll-like receptor 3 agonist, polyinosinic-polycytidylic acid, upregulates carbonic anhydrase II in human keratinocytes. *Acta Derm Venereol*. 2018; 98:762–65.  
<https://doi.org/10.2340/00015555-2963>  
PMID:29738048
55. Krasnikov BF, Nostramo R, Pinto JT, Cooper AJ. Assay and purification of omega-amidase/Nit2, a ubiquitously expressed putative tumor suppressor, that catalyzes the deamidation of the alpha-keto acid analogues of glutamine and asparagine. *Anal Biochem*. 2009; 391:144–50.  
<https://doi.org/10.1016/j.ab.2009.05.025>  
PMID:19464248
56. Ishikawa H, Yasui K, Oketa Y, Suzuki M, Ono S. Increased expression of valosin-containing protein in the skin of patients with amyotrophic lateral sclerosis. *J Clin Neurosci*. 2012; 19:522–26.  
<https://doi.org/10.1016/j.jocn.2011.05.044>  
PMID:22321369
57. Davis EJ, Lachaud C, Appleton P, Macartney TJ, Näthke I, Rouse J. DVC1 (C1orf124) recruits the p97 protein segregase to sites of DNA damage. *Nat Struct Mol Biol*. 2012; 19:1093–100.  
<https://doi.org/10.1038/nsmb.2394>  
PMID:23042607
58. Janig E, Haslbeck M, Aigelsreiter A, Braun N, Unterthor D, Wolf P, Khaskhely NM, Buchner J, Denk H, Zatloukal K. Clusterin associates with altered elastic fibers in human photoaged skin and prevents elastin from ultraviolet-induced aggregation in vitro. *Am J Pathol*. 2007; 171:1474–82.  
<https://doi.org/10.2353/ajpath.2007.061064>  
PMID:17872975
59. Kim M, Lee J, Park TJ, Kang HY. Paracrine crosstalk between endothelial cells and melanocytes through clusterin to inhibit pigmentation. *Exp Dermatol*. 2018; 27:98–100.  
<https://doi.org/10.1111/exd.13443>  
PMID:28887822
60. Buquicchio R, Foti C, Loconsole F, Polimeno L, Ventura MT. Clusterin serum level: how does it affect psoriatic patients? *J Biol Regul Homeost Agents*. 2017; 31:785–89.  
PMID:28958138
61. Freund A, Zhong FL, Venteicher AS, Meng Z, Veenstra TD, Frydman J, Artandi SE. Proteostatic control of telomerase function through TRIC-mediated folding of TCAB1. *Cell*. 2014; 159:1389–403.  
<https://doi.org/10.1016/j.cell.2014.10.059>  
PMID:25467444
62. Ikeuchi Y, Imanishi A, Sudo K, Fukunaga T, Yokoi A, Matsubara L, Goto C, Fukuoka T, Kuronuma K, Kono R, Hasegawa N, Asano S, Ito M. Translin modulates mesenchymal cell proliferation and differentiation in mice. *Biochem Biophys Res Commun*. 2018; 504:115–22.  
<https://doi.org/10.1016/j.bbrc.2018.08.141>  
PMID:30172368
63. Perrot G, Colin-Pierre C, Ramont L, Prault I, Garbar C, Bardey V, Jeanmaire C, Mine S, Danoux L, Berthélémy N, Maquart FX, Wegrowski Y, Brézillon S. Decreased

- expression of GPC1 in human skin keratinocytes and epidermis during ageing. *Exp Gerontol.* 2019; 126:110693.  
<https://doi.org/10.1016/j.exger.2019.110693>  
PMID:[31430521](https://pubmed.ncbi.nlm.nih.gov/31430521/)
64. McClintock D, Ratner D, Lokuge M, Owens DM, Gordon LB, Collins FS, Djabali K. The mutant form of lamin a that causes hutchinson-gilford progeria is a biomarker of cellular aging in human skin. *PLoS One.* 2007; 2:e1269.  
<https://doi.org/10.1371/journal.pone.0001269>  
PMID:[18060063](https://pubmed.ncbi.nlm.nih.gov/18060063/)
65. Urbaniak A, Jablonska K, Podhorska-Okolow M, Ugorski M, Dziegiel P. Prolactin-induced protein (PIP)-characterization and role in breast cancer progression. *Am J Cancer Res.* 2018; 8:2150–64.  
PMID:[30555735](https://pubmed.ncbi.nlm.nih.gov/30555735/)
66. Sugiura S, Tazuke M, Ueno S, Sugiura Y, Kato I, Miyahira Y, Yamamoto Y, Sato H, Udagawa J, Uehara M, Sugiura H. Effect of prolactin-induced protein on human skin: new insight into the digestive action of this aspartic peptidase on the stratum corneum and its induction of keratinocyte proliferation. *J Invest Dermatol.* 2015; 135:776–85.  
<https://doi.org/10.1038/jid.2014.448>  
PMID:[25313533](https://pubmed.ncbi.nlm.nih.gov/25313533/)
67. Grindheim AK, Saraste J, Vedeler A. Protein phosphorylation and its role in the regulation of annexin A2 function. *Biochim Biophys Acta Gen Subj.* 2017; 1861:2515–29.  
<https://doi.org/10.1016/j.bbagen.2017.08.024>  
PMID:[28867585](https://pubmed.ncbi.nlm.nih.gov/28867585/)
68. Wang Y, Wu X, Wang Q, Zheng M, Pang L. Annexin A2 functions downstream of c-Jun n-terminal kinase to promote skin fibroblast cell migration. *Mol Med Rep.* 2017; 15:4207–16.  
<https://doi.org/10.3892/mmr.2017.6535>  
PMID:[28487977](https://pubmed.ncbi.nlm.nih.gov/28487977/)
69. Kim SH, Jung SH, Chung H, Jo DI, Kim CK, Park SH, Won KJ, Jeon HS, Kim B. Annexin A2 participates in human skin keloid formation by inhibiting fibroblast proliferation. *Arch Dermatol Res.* 2014; 306:347–57.  
<https://doi.org/10.1007/s00403-014-1438-x>  
PMID:[24402284](https://pubmed.ncbi.nlm.nih.gov/24402284/)
70. Zimmermann P. The prevalence and significance of PDZ domain-phosphoinositide interactions. *Biochim Biophys Acta.* 2006; 1761:947–56.  
<https://doi.org/10.1016/j.bbali.2006.04.003>  
PMID:[16884951](https://pubmed.ncbi.nlm.nih.gov/16884951/)
71. Gauzzi MC. Vitamin d-binding protein and multiple sclerosis: evidence, controversies, and needs. *Mult Scler.* 2018; 24:1526–35.  
<https://doi.org/10.1177/1352458518792433>  
PMID:[30113253](https://pubmed.ncbi.nlm.nih.gov/30113253/)
72. Nagasawa H, Uto Y, Sasaki H, Okamura N, Murakami A, Kubo S, Kirk KL, Hori H. Gc protein (vitamin d-binding protein): gc genotyping and GcMAF precursor activity. *Anticancer Res.* 2005; 25:3689–95.  
PMID:[16302727](https://pubmed.ncbi.nlm.nih.gov/16302727/)
73. Madsen DH, Szabo R, Molinolo AA, Bugge TH. TMPRSS13 deficiency impairs stratum corneum formation and epidermal barrier acquisition. *Biochem J.* 2014; 461:487–95.  
<https://doi.org/10.1042/BJ20140337>  
PMID:[24832573](https://pubmed.ncbi.nlm.nih.gov/24832573/)
74. Kashkoui MB, Sianati H. Re: “secondary orbital reconstruction in patients with prior orbital fracture repair”. *Ophthalmic Plast Reconstr Surg.* 2017; 33:227–8.  
<https://doi.org/10.1097/IOP.0000000000000908>  
PMID:[28475526](https://pubmed.ncbi.nlm.nih.gov/28475526/)
75. Jansen RK, Kaitanis C, Sasaki C, Lee SB, Tomkins J, Alverson AJ, Daniell H. Phylogenetic analyses of vitis (vitaceae) based on complete chloroplast genome sequences: effects of taxon sampling and phylogenetic methods on resolving relationships among rosids. *BMC Evol Biol.* 2006; 6:32.  
<https://doi.org/10.1186/1471-2148-6-32>  
PMID:[16603088](https://pubmed.ncbi.nlm.nih.gov/16603088/)
76. Bello V, Moreau N, Sirour C, Hidalgo M, Buisson N, Darrivière T. The dystroglycan: nestled in an adhesome during embryonic development. *Dev Biol.* 2015; 401:132–42.  
<https://doi.org/10.1016/j.ydbio.2014.07.006>  
PMID:[25050932](https://pubmed.ncbi.nlm.nih.gov/25050932/)
77. Ashraf U, Tengo L, Le Corre L, Fournier G, Busca P, McCarthy AA, Rameix-Welti MA, Gravier-Pelletier C, Ruigrok RW, Jacob Y, Vidalain PO, Pietrancosta N, Crépin T, Naffakh N. Destabilization of the human RED-SMU1 splicing complex as a basis for host-directed antiinfluenza strategy. *Proc Natl Acad Sci USA.* 2019; 116:10968–77.  
<https://doi.org/10.1073/pnas.1901214116>  
PMID:[31076555](https://pubmed.ncbi.nlm.nih.gov/31076555/)
78. Ma J, Xu S, Wang X, Zhang J, Wang Y, Liu M, Jin L, Wu M, Qian D, Li X, Zhen Q, Guo H, Gao J, et al. Noninvasive analysis of skin proteins in healthy chinese subjects using an orbitrap fusion tribrid mass spectrometer. *Skin Res Technol.* 2019; 25:424–33.  
<https://doi.org/10.1111/srt.12668> PMID:[30657212](https://pubmed.ncbi.nlm.nih.gov/30657212/)
79. Kizawa K, Takahara H, Unno M, Heizmann CW. S100 and S100 fused-type protein families in epidermal maturation with special focus on S100A3 in mammalian hair cuticles. *Biochimie.* 2011; 93:2038–47.

- <https://doi.org/10.1016/j.biochi.2011.05.028>  
PMID:[21664410](https://pubmed.ncbi.nlm.nih.gov/21664410/)
80. Sercu S, Zhang M, Oyama N, Hansen U, Ghalbzouri AE, Jun G, Geentjens K, Zhang L, Merregaert JH. Interaction of extracellular matrix protein 1 with extracellular matrix components: ECM1 is a basement membrane protein of the skin. *J Invest Dermatol*. 2008; 128:1397–408.  
<https://doi.org/10.1038/sj.jid.5701231>  
PMID:[18200062](https://pubmed.ncbi.nlm.nih.gov/18200062/)
81. Niu X, Chang W, Liu R, Hou R, Li J, Wang C, Li X, Zhang K. mRNA and protein expression of the angiogenesis-related genes EDIL3, AMOT and ECM1 in mesenchymal stem cells in psoriatic dermis. *Clin Exp Dermatol*. 2016; 41:533–40.  
<https://doi.org/10.1111/ced.12783>  
PMID:[26644074](https://pubmed.ncbi.nlm.nih.gov/26644074/)
82. Sander CS, Sercu S, Ziemer M, Hipler UC, Elsner P, Thiele JJ, Merregaert J. Expression of extracellular matrix protein 1 (ECM1) in human skin is decreased by age and increased upon ultraviolet exposure. *Br J Dermatol*. 2006; 154:218–24.  
<https://doi.org/10.1111/j.1365-2133.2005.07001.x>  
PMID:[16433788](https://pubmed.ncbi.nlm.nih.gov/16433788/)
83. Agarwal V, Naskar P, Agasti S, Khurana GK, Vishwakarma P, Lynn AM, Roche PA, Puri N. The cysteine-rich domain of synaptosomal-associated protein of 23 kDa (SNAP-23) regulates its membrane association and regulated exocytosis from mast cells. *Biochim Biophys Acta Mol Cell Res*. 2019; 1866:1618–33.  
<https://doi.org/10.1016/j.bbamcr.2019.06.015>  
PMID:[31260699](https://pubmed.ncbi.nlm.nih.gov/31260699/)
84. Koch J, Foekens J, Timmermans M, Fink W, Wirzbach A, Kramer MD, Schaefer BM. Human VAT-1: a calcium-regulated activation marker of human epithelial cells. *Arch Dermatol Res*. 2003; 295:203–10.  
<https://doi.org/10.1007/s00403-003-0421-8>  
PMID:[12898150](https://pubmed.ncbi.nlm.nih.gov/12898150/)
85. Kunwar AJ, Rickmann M, Backofen B, Browski SM, Rosenbusch J, Schöning S, Fleischmann T, Kriegelstein K, Fischer von Mollard G. Lack of the endosomal SNAREs vti1a and vti1b led to significant impairments in neuronal development. *Proc Natl Acad Sci USA*. 2011; 108:2575–80.  
<https://doi.org/10.1073/pnas.1013891108>  
PMID:[21262811](https://pubmed.ncbi.nlm.nih.gov/21262811/)
86. Emperador-Melero J, Toonen RF, Verhage M. Vti proteins: beyond endolysosomal trafficking. *Neuroscience*. 2019; 420:32–40.  
<https://doi.org/10.1016/j.neuroscience.2018.11.014>  
PMID:[30471354](https://pubmed.ncbi.nlm.nih.gov/30471354/)
87. Le Duff M, Gouju J, Jonchère B, Guillon J, Toutain B, Boissard A, Henry C, Guette C, Lelièvre E, Coqueret O. Regulation of senescence escape by the cdk4-EZH2-AP2M1 pathway in response to chemotherapy. *Cell Death Dis*. 2018; 9:199.  
<https://doi.org/10.1038/s41419-017-0209-y>  
PMID:[29415991](https://pubmed.ncbi.nlm.nih.gov/29415991/)
88. Wu Y, Zhou J, Li Y, Zhou Y, Cui Y, Yang G, Hong Y. Rap1A regulates osteoblastic differentiation via the ERK and p38 mediated signaling. *PLoS One*. 2015; 10:e0143777.  
<https://doi.org/10.1371/journal.pone.0143777>  
PMID:[26599016](https://pubmed.ncbi.nlm.nih.gov/26599016/)
89. Li Q, Xu A, Chu Y, Chen T, Li H, Yao L, Zhou P, Xu M. Rap1A promotes esophageal squamous cell carcinoma metastasis through the AKT signaling pathway. *Oncol Rep*. 2019; 42:1815–24.  
<https://doi.org/10.3892/or.2019.7309>  
PMID:[31545475](https://pubmed.ncbi.nlm.nih.gov/31545475/)
90. Feng L, Wang J, Chen J. The Lys63-specific deubiquitinating enzyme BRCC36 is regulated by two scaffold proteins localizing in different subcellular compartments. *J Biol Chem*. 2010; 285:30982–88.  
<https://doi.org/10.1074/jbc.M110.135392>  
PMID:[20656690](https://pubmed.ncbi.nlm.nih.gov/20656690/)
91. Bano D, Prehn JH. Apoptosis-inducing factor (AIF) in physiology and disease: the tale of a repented natural born killer. *EBioMedicine*. 2018; 30:29–37.  
<https://doi.org/10.1016/j.ebiom.2018.03.016>  
PMID:[29605508](https://pubmed.ncbi.nlm.nih.gov/29605508/)
92. Takama H, Sugiura K, Ogawa Y, Muro Y, Akiyama M. Possible roles of barrier-to-autointegration factor 1 in regulation of keratinocyte differentiation and proliferation. *J Dermatol Sci*. 2013; 71:100–06.  
<https://doi.org/10.1016/j.jdermsci.2013.04.007>  
PMID:[23664529](https://pubmed.ncbi.nlm.nih.gov/23664529/)
93. Sirover MA. New nuclear functions of the glycolytic protein, glyceraldehyde-3-phosphate dehydrogenase, in mammalian cells. *J Cell Biochem*. 2005; 95:45–52.  
<https://doi.org/10.1002/jcb.20399>  
PMID:[15770658](https://pubmed.ncbi.nlm.nih.gov/15770658/)
94. Ameri K, Rajah AM, Nguyen V, Sanders TA, Jahangiri A, Delay M, Donne M, Choi HJ, Tormos KV, Yeghiazarians Y, Jeffrey SS, Rinaudo PF, Rowitch DH, et al. Nuclear localization of the mitochondrial factor HIGD1A during metabolic stress. *PLoS One*. 2013; 8:e62758.  
<https://doi.org/10.1371/journal.pone.0062758>  
PMID:[23646141](https://pubmed.ncbi.nlm.nih.gov/23646141/)
95. Adastra KL, Chi MM, Riley JK, Moley KH. A differential autophagic response to hyperglycemia in the developing murine embryo. *Reproduction*. 2011; 141:607–15.  
<https://doi.org/10.1530/REP-10-0265> PMID:[21367963](https://pubmed.ncbi.nlm.nih.gov/21367963/)

96. Yeung SJ, Pan J, Lee MH. Roles of p53, MYC and HIF-1 in regulating glycolysis - the seventh hallmark of cancer. *Cell Mol Life Sci.* 2008; 65:3981–99. <https://doi.org/10.1007/s00018-008-8224-x> PMID:[18766298](#)
97. Barinova K, Serebryakova M, Sheval E, Schmalhausen E, Muronetz V. Modification by glyceraldehyde-3-phosphate prevents amyloid transformation of alpha-synuclein. *Biochim Biophys Acta Proteins Proteom.* 2019; 1867:396–404. <https://doi.org/10.1016/j.bbapap.2019.01.003> PMID:[30639428](#)
98. Takaoka Y, Goto S, Nakano T, Tseng HP, Yang SM, Kawamoto S, Ono K, Chen CL. Glyceraldehyde-3-phosphate dehydrogenase (GAPDH) prevents lipopolysaccharide (LPS)-induced, sepsis-related severe acute lung injury in mice. *Sci Rep.* 2014; 4:5204. <https://doi.org/10.1038/srep05204> PMID:[24902773](#)
99. Lee SJ, Hwang AB, Kenyon C. Inhibition of respiration extends *C. Elegans* life span via reactive oxygen species that increase HIF-1 activity. *Curr Biol.* 2010; 20:2131–36. <https://doi.org/10.1016/j.cub.2010.10.057> PMID:[21093262](#)
100. Duan J, Nilsson L, Lambert B. Structural and functional analysis of mutations at the human hypoxanthine phosphoribosyl transferase (HPRT1) locus. *Hum Mutat.* 2004; 23:599–611. <https://doi.org/10.1002/humu.20047> PMID:[15146465](#)
101. Dasika SK, Vinnakota KC, Beard DA. Characterization of the kinetics of cardiac cytosolic malate dehydrogenase and comparative analysis of cytosolic and mitochondrial isoforms. *Biophys J.* 2015; 108:420–30. <https://doi.org/10.1016/j.bpj.2014.11.3466> PMID:[25606689](#)
102. Robbins D, Wittwer JA, Codarin S, Circu ML, Aw TY, Huang TT, Van Remmen H, Richardson A, Wang DB, Witt SN, Klein RL, Zhao Y. Isocitrate dehydrogenase 1 is downregulated during early skin tumorigenesis which can be inhibited by overexpression of manganese superoxide dismutase. *Cancer Sci.* 2012; 103:1429–33. <https://doi.org/10.1111/j.1349-7006.2012.02317.x> PMID:[22533343](#)
103. Levy-Rimler G, Viitanen P, Weiss C, Sharkia R, Greenberg A, Niv A, Lustig A, Delarea Y, Azem A. The effect of nucleotides and mitochondrial chaperonin 10 on the structure and chaperone activity of mitochondrial chaperonin 60. *Eur J Biochem.* 2001; 268:3465–72. <https://doi.org/10.1046/j.1432-1327.2001.02243.x> PMID:[11422376](#)
104. Budenholzer L, Cheng CL, Li Y, Hochstrasser M. Proteasome structure and assembly. *J Mol Biol.* 2017; 429:3500–24. <https://doi.org/10.1016/j.jmb.2017.05.027> PMID:[28583440](#)
105. Cavinato M, Jansen-Dürr P. Molecular mechanisms of UVB-induced senescence of dermal fibroblasts and its relevance for photoaging of the human skin. *Exp Gerontol.* 2017; 94:78–82. <https://doi.org/10.1016/j.exger.2017.01.009> PMID:[28093316](#)
106. Li J, Ji C, Chen J, Yang Z, Wang Y, Fei X, Zheng M, Gu X, Wen G, Xie Y, Mao Y. Identification and characterization of a novel cut family cDNA that encodes human copper transporter protein CutC. *Biochem Biophys Res Commun.* 2005; 337:179–83. <https://doi.org/10.1016/j.bbrc.2005.09.029> PMID:[16182249](#)
107. Grandi A, Santi A, Campagnoli S, Parri M, De Camilli E, Song C, Jin B, Lacombe A, Castori-Eppenberger S, Sarmientos P, Grandi G, Viale G, Terracciano L, et al. ERMP1, a novel potential oncogene involved in UPR and oxidative stress defense, is highly expressed in human cancer. *Oncotarget.* 2016; 7:63596–610. <https://doi.org/10.18632/oncotarget.11550> PMID:[27566589](#)
108. Weiss AK, Loeffler JR, Liedl KR, Gstach H, Jansen-Dürr P. The fumarylacetoacetate hydrolase (FAH) superfamily of enzymes: multifunctional enzymes from microbes to mitochondria. *Biochem Soc Trans.* 2018; 46:295–309. <https://doi.org/10.1042/BST20170518> PMID:[29487229](#)
109. Tarutani M, Itami S, Okabe M, Ikawa M, Tezuka T, Yoshikawa K, Kinoshita T, Takeda J. Tissue-specific knockout of the mouse pig-a gene reveals important roles for GPI-anchored proteins in skin development. *Proc Natl Acad Sci USA.* 1997; 94:7400–05. <https://doi.org/10.1073/pnas.94.14.7400> PMID:[9207103](#)
110. Gonzalez AC, Stroobants S, Reisdorf P, Gavin AL, Nemazee D, Schwudke D, D'Hooge R, Saftig P, Damme M. PLD3 and spinocerebellar ataxia. *Brain.* 2018; 141:e78. <https://doi.org/10.1093/brain/awy258> PMID:[30312375](#)
111. Mukadam AS, Breusegem SY, Seaman MN. Analysis of novel endosome-to-golgi retrieval genes reveals a role for PLD3 in regulating endosomal protein sorting and amyloid precursor protein processing. *Cell Mol Life Sci.* 2018; 75:2613–25. <https://doi.org/10.1007/s00018-018-2752-9> PMID:[29368044](#)

112. Cruchaga C, Karch CM, Jin SC, Benitez BA, Cai Y, Guerreiro R, Harari O, Norton J, Budde J, Bertelsen S, Jeng AT, Cooper B, Skorupa T, et al, and Alzheimer's Research UK (ARUK) Consortium. Rare coding variants in the phospholipase D3 gene confer risk for alzheimer's disease. *Nature*. 2014; 505:550–54.  
<https://doi.org/10.1038/nature12825>  
PMID:[24336208](https://pubmed.ncbi.nlm.nih.gov/24336208/)
113. Houtman SH, Rutteman M, De Zeeuw CI, French PJ. Echinoderm microtubule-associated protein like protein 4, a member of the echinoderm microtubule-associated protein family, stabilizes microtubules. *Neuroscience*. 2007; 144:1373–82.  
<https://doi.org/10.1016/j.neuroscience.2006.11.015>  
PMID:[17196341](https://pubmed.ncbi.nlm.nih.gov/17196341/)
114. Pecci A, Ma X, Savoia A, Adelstein RS. MYH9: structure, functions and role of non-muscle myosin IIA in human disease. *Gene*. 2018; 664:152–67.  
<https://doi.org/10.1016/j.gene.2018.04.048>  
PMID:[29679756](https://pubmed.ncbi.nlm.nih.gov/29679756/)
115. Krause M, Dent EW, Bear JE, Loureiro JJ, Gertler FB. ena/VASP proteins: regulators of the actin cytoskeleton and cell migration. *Annu Rev Cell Dev Biol*. 2003; 19:541–64.  
<https://doi.org/10.1146/annurev.cellbio.19.050103.103356> PMID:[14570581](https://pubmed.ncbi.nlm.nih.gov/14570581/)
116. Waldron AL, Cahan SH, Francklyn CS, Ebert AM. A single danio rerio hars gene encodes both cytoplasmic and mitochondrial histidyl-tRNA synthetases. *PLoS One*. 2017; 12:e0185317.  
<https://doi.org/10.1371/journal.pone.0185317>  
PMID:[28934368](https://pubmed.ncbi.nlm.nih.gov/28934368/)
117. Castillo-González C, Zhang X. Transactivator: a new face of arabidopsis AGO1. *Dev Cell*. 2018; 44:277–79.  
<https://doi.org/10.1016/j.devcel.2018.01.014>  
PMID:[29408232](https://pubmed.ncbi.nlm.nih.gov/29408232/)
118. Boëls N. [Taking action in the workplace]. *Perspect Infirm*. 2016; 13:14.  
PMID:[26995817](https://pubmed.ncbi.nlm.nih.gov/26995817/)
119. Rice RH, Phillips MA, Sundberg JP. Localization of hair shaft protein VSIG8 in the hair follicle, nail unit, and oral cavity. *J Invest Dermatol*. 2011; 131:1936–38.  
<https://doi.org/10.1038/jid.2011.133>  
PMID:[21614015](https://pubmed.ncbi.nlm.nih.gov/21614015/)
120. Pirone L, Smaldone G, Spinelli R, Barberisi M, Beguinot F, Vitagliano L, Miele C, Di Gaetano S, Raciti GA, Pedone E. KCTD1: a novel modulator of adipogenesis through the interaction with the transcription factor AP2 $\alpha$ . *Biochim Biophys Acta Mol Cell Biol Lipids*. 2019; 1864:158514.  
<https://doi.org/10.1016/j.bbalip.2019.08.010>  
PMID:[31465887](https://pubmed.ncbi.nlm.nih.gov/31465887/)
121. Howard HC, Mount DB, Rochefort D, Byun N, Dupré N, Lu J, Fan X, Song L, Rivière JB, Prévost C, Horst J, Simonati A, Lemcke B, et al. The K-Cl cotransporter KCC3 is mutant in a severe peripheral neuropathy associated with agenesis of the corpus callosum. *Nat Genet*. 2002; 32:384–92.  
<https://doi.org/10.1038/ng1002>  
PMID:[12368912](https://pubmed.ncbi.nlm.nih.gov/12368912/)
122. Bradford MM. A rapid and sensitive method for the quantitation of microgram quantities of protein utilizing the principle of protein-dye binding. *Anal Biochem*. 1976; 72:248–54.  
<https://doi.org/10.1006/abio.1976.9999>  
PMID:[942051](https://pubmed.ncbi.nlm.nih.gov/942051/)
123. Cox J, Mann M. MaxQuant enables high peptide identification rates, individualized p.p.b.-range mass accuracies and proteome-wide protein quantification. *Nat Biotechnol*. 2008; 26:1367–72.  
<https://doi.org/10.1038/nbt.1511>  
PMID:[19029910](https://pubmed.ncbi.nlm.nih.gov/19029910/)
124. Bruderer R, Bernhardt OM, Gandhi T, Reiter L. High-precision iRT prediction in the targeted analysis of data-independent acquisition and its impact on identification and quantitation. *Proteomics*. 2016; 16:2246–56.  
<https://doi.org/10.1002/pmic.201500488>  
PMID:[27213465](https://pubmed.ncbi.nlm.nih.gov/27213465/)
125. Choi M, Chang CY, Clough T, Broudy D, Killeen T, MacLean B, Vitek O. MSstats: an R package for statistical analysis of quantitative mass spectrometry-based proteomic experiments. *Bioinformatics*. 2014; 30:2524–26.  
<https://doi.org/10.1093/bioinformatics/btu305>  
PMID:[24794931](https://pubmed.ncbi.nlm.nih.gov/24794931/)



## SUPPLEMENTARY MATERIALS

### Supplementary Figure

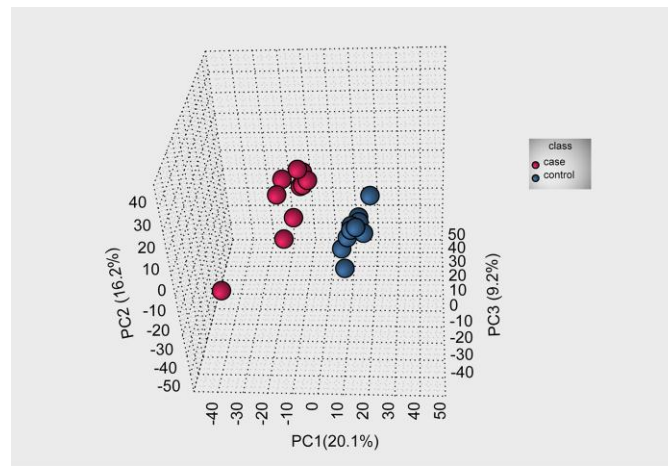

**Supplementary Figure 1. Principal component analysis.** The data revealed two separate DEP clusters that can distinguish the young from the elderly group.

## **Supplementary Tables**

Please browse Full Text version to see the data of Supplementary Tables 1 to 8.

**Supplementary Table 1. Proteins identified via DDA.**

**Supplementary Table 2. Proteomics data of 20 samples.**

**Supplementary Table 3. Proteins quantified via DIA.**

**Supplementary Table 4. GO classification of the identified proteins.**

**Supplementary Table 5. GO classification of the DEPs.**

**Supplementary Table 6. KOG classification of DEPs.**

**Supplementary Table 7. KEGG pathway analysis of the DEPs.**

**Supplementary Table 8. Subcellular localization of DEPs.**
