# Supplementary material for: Quantitative proteomics analysis of young and elderly skin with DIA mass spectrometry reveals new skin aging-related proteins
Source: publisher site journal article supplement (doi:10.18632/aging.103461), 2020-06-29
Supplement: Supplementary file [file aging-v12i13-103461-supplementary-material-SD1.pdf]

## SUPPLEMENTARY FIGURE

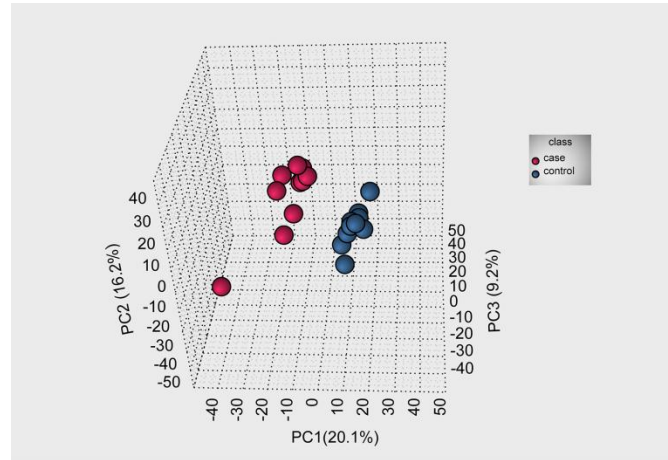

**Supplementary Figure 1. Principal component analysis.** The data revealed two separate DEP clusters that can distinguish the young from the elderly group.
