# Supplementary material for: Quantitative proteomics analysis of young and elderly skin with DIA mass spectrometry reveals new skin aging-related proteins
Source: Aging (Albany NY). 2020 Jun 29;12(13):13529–54. doi: 10.18632/aging.103461 (PMC7377841; doi:10.18632/aging.103461)
Supplement: Supplementary Table 1 [file aging-12-103461-s006..xlsx]

## Sheet: Proteins identified via DDA
Table S1. Proteins identified via DDA
Primary_protein_ID	Peptides	Unique peptides	Sequence coverage [%]	Score
sp|A0A075B6K5|LV39_HUMAN	1	1	13.9	7.1382
sp|P06310|KV230_HUMAN	1	1	10.8	11.411
sp|P04433|KV311_HUMAN	1	1	7.8	7.6411
sp|P01767|HV353_HUMAN	1	1	9.5	10.878
sp|A0A0C4DH25|KVD20_HUMAN	2	2	21.6	13.462
sp|A0A0C4DH31|HV118_HUMAN	1	1	14.5	6.844
sp|A0A0C4DH68|KV224_HUMAN	1	1	10.8	7.026
sp|A0A1B0GTR4|SPRR5_HUMAN	1	1	13.9	8.1446
sp|A0FGR9|ESYT3_HUMAN	7	7	8.8	52.123
sp|A0JNW5|UH1BL_HUMAN	1	1	1.1	6.686
sp|A1A5B4|ANO9_HUMAN	2	2	2.6	10.88
sp|A1IGU5|ARH37_HUMAN	1	1	2.4	6.6561
sp|A1L0T0|ILVBL_HUMAN	3	3	7.1	18.357
sp|A1L3X0|ELOV7_HUMAN	1	1	3.6	7.6726
sp|A2RU67|F234B_HUMAN	2	2	6.6	14.37
sp|A4D126|ISPD_HUMAN	4	4	8.9	23.759
sp|A4D1P6|WDR91_HUMAN	9	9	15.5	58.832
sp|A4D2B0|MBLC1_HUMAN	3	3	16.2	20.851
sp|A5YKK6|CNOT1_HUMAN	2	2	1.1	11.358
sp|A6NCN2|KR87P_HUMAN	16	3	51.8	27.924
sp|P30046|DOPD_HUMAN	1	1	11	7.4022
sp|A8K2U0|A2ML1_HUMAN	48	48	36.9	323.31
sp|A8MTL9|HMSD_HUMAN	1	1	10.1	7.2413
sp|P62308|RUXG_HUMAN	3	3	26.3	16.989
sp|B3EWG3|FM25A_HUMAN	1	1	7.9	6.4666
sp|Q99613|EIF3C_HUMAN	3	3	3.8	16.716
sp|B7ZAQ6|GPHRA_HUMAN	1	1	2.6	7.36
sp|P0CG04|IGLC1_HUMAN	3	1	46.2	20.717
sp|Q13765|NACA_HUMAN	1	1	6.5	12.468
sp|O00115|DNS2A_HUMAN	5	5	14.2	37.826
sp|O00154|BACH_HUMAN	4	4	12.4	25.81
sp|O00159|MYO1C_HUMAN	2	2	2.9	13.589
sp|O00161|SNP23_HUMAN	4	4	25.1	34.724
sp|O00194|RB27B_HUMAN	4	4	24.8	24.383
sp|O00204|ST2B1_HUMAN	4	4	10.7	25.084
sp|O00214|LEG8_HUMAN	1	1	2.8	6.5878
sp|O00231|PSD11_HUMAN	4	4	11.8	25.631
sp|O00232|PSD12_HUMAN	2	2	4.6	12.221
sp|O00258|WRB_HUMAN	1	1	8	6.5023
sp|O00299|CLIC1_HUMAN	5	5	23.2	31.32
sp|O00303|EIF3F_HUMAN	4	4	16.2	25.779
sp|O00391|QSOX1_HUMAN	13	13	20.2	117.72
sp|O00423|EMAL1_HUMAN	5	4	7.2	44.286
sp|O00429|DNM1L_HUMAN	3	3	5.2	18.621
sp|O00462|MANBA_HUMAN	11	10	15	96.314
sp|O00534|VMA5A_HUMAN	11	11	19.2	105.06
sp|O00560|SDCB1_HUMAN	3	3	16.4	20.284
sp|O00571|DDX3X_HUMAN	8	7	13.9	46.029
sp|O00584|RNT2_HUMAN	4	4	20.3	166.27
sp|O00587|MFNG_HUMAN	1	1	6.9	6.8695
sp|O00628|PEX7_HUMAN	6	6	23.8	41.362
sp|O00743|PPP6_HUMAN	4	4	15.7	25.62
sp|O00754|MA2B1_HUMAN	15	15	20.2	124.15
sp|O00757|F16P2_HUMAN	1	1	2.9	8.1504
sp|O00764|PDXK_HUMAN	1	1	5.4	6.844
sp|O14498|ISLR_HUMAN	2	2	5.4	11.285
sp|O14618|CCS_HUMAN	2	2	5.5	12.703
sp|O14657|TOR1B_HUMAN	2	2	7.1	12.126
sp|O14662|STX16_HUMAN	2	2	8.9	15.289
sp|O14684|PTGES_HUMAN	1	1	6.6	7.6561
sp|O14732|IMPA2_HUMAN	4	4	19.1	27.846
sp|O14735|CDIPT_HUMAN	3	3	16.4	18.287
sp|O14744|ANM5_HUMAN	10	10	17.6	75.566
sp|O14773|TPP1_HUMAN	6	6	14.7	71.977
sp|O14818|PSA7_HUMAN	14	14	51.2	116.88
sp|O14828|SCAM3_HUMAN	1	1	4.6	6.8175
sp|O14841|OPLA_HUMAN	9	9	9.6	89.386
sp|P19105|ML12A_HUMAN	2	2	16.4	19.027
sp|O14972|DSCR3_HUMAN	2	2	6.7	11.506
sp|O15020|SPTN2_HUMAN	9	9	5.9	61.83
sp|O15031|PLXB2_HUMAN	7	7	6.6	48.435
sp|O15042|SR140_HUMAN	3	3	3.3	17.444
sp|O15118|NPC1_HUMAN	11	11	10.6	74.504
sp|O60684|IMA7_HUMAN	1	1	3.5	7.2794
sp|O15144|ARPC2_HUMAN	6	6	22	36.173
sp|O15173|PGRC2_HUMAN	2	1	10.3	11.569
sp|O15254|ACOX3_HUMAN	3	3	6.1	16.748
sp|O15260|SURF4_HUMAN	5	5	21.6	34.657
sp|O15296|LX15B_HUMAN	4	4	8.6	26.604
sp|O15321|TM9S1_HUMAN	1	1	2.6	7.8655
sp|O15372|EIF3H_HUMAN	2	2	9.9	12.906
sp|O15382|BCAT2_HUMAN	4	4	17.1	26.84
sp|O15400|STX7_HUMAN	2	2	8.8	13.365
sp|O15431|COPT1_HUMAN	1	1	10	15.056
sp|O15455|TLR3_HUMAN	5	5	6.6	51.868
sp|O15498|YKT6_HUMAN	2	2	12.1	14.537
sp|O15511|ARPC5_HUMAN	1	1	12.6	7.9106
sp|O15533|TPSN_HUMAN	1	1	2.2	6.761
sp|O43143|DHX15_HUMAN	2	2	2.9	10.606
sp|O43149|ZZEF1_HUMAN	4	4	1.7	32.354
sp|O43175|SERA_HUMAN	3	3	5.8	16.711
sp|O43240|KLK10_HUMAN	8	8	30.4	66.394
sp|O43242|PSMD3_HUMAN	3	3	6.4	16.517
sp|O43278|SPIT1_HUMAN	5	5	9.3	29.826
sp|O43299|AP5Z1_HUMAN	1	1	1.7	8.0882
sp|O43396|TXNL1_HUMAN	2	2	10	12.566
sp|O43464|HTRA2_HUMAN	3	3	10	19.418
sp|O43504|LTOR5_HUMAN	1	1	22	15.995
sp|O43548|TGM5_HUMAN	11	11	21	115.89
sp|O43567|RNF13_HUMAN	5	5	15.2	96.673
sp|O43598|DNPH1_HUMAN	2	2	13.8	16.323
sp|O43617|TPPC3_HUMAN	2	2	11.7	11.67
sp|O43707|ACTN4_HUMAN	21	14	29.5	177.03
sp|O43759|SNG1_HUMAN	1	1	5.2	8.1474
sp|O43760|SNG2_HUMAN	3	3	11.6	20.7
sp|O43776|SYNC_HUMAN	4	4	10.6	29.584
sp|O43813|LANC1_HUMAN	2	2	6.3	11.633
sp|O43847|NRDC_HUMAN	4	4	4.8	27.272
sp|O43924|PDE6D_HUMAN	2	2	20.7	12.178
sp|O60256|KPRB_HUMAN	2	2	9.8	11.383
sp|O60259|KLK8_HUMAN	4	4	28.1	38.73
sp|O60313|OPA1_HUMAN	2	2	2.3	10.62
sp|O60437|PEPL_HUMAN	22	22	15.1	170.04
sp|O60506|HNRPQ_HUMAN	2	2	4.7	12.932
sp|O60610|DIAP1_HUMAN	2	2	1.4	10.569
sp|O60664|PLIN3_HUMAN	5	5	16.1	33.549
sp|O60701|UGDH_HUMAN	3	3	8.3	23.409
sp|O60762|DPM1_HUMAN	2	2	8.5	11.953
sp|O60763|USO1_HUMAN	2	2	2.3	10.827
sp|O60784|TOM1_HUMAN	1	1	2.4	7.2549
sp|Q99880|H2B1L_HUMAN	2	2	19	14.059
sp|O60861|GAS7_HUMAN	3	3	11.3	20.398
sp|O60879|DIAP2_HUMAN	1	1	1.4	7.0325
sp|O60888|CUTA_HUMAN	2	2	15.6	31.322
sp|O60911|CATL2_HUMAN	13	13	48.2	249.05
sp|O60925|PFD1_HUMAN	2	2	17.2	12.133
sp|O60936|NOL3_HUMAN	1	1	9.1	7.9012
sp|O75083|WDR1_HUMAN	5	5	16	61.059
sp|O75131|CPNE3_HUMAN	15	14	32.2	153.18
sp|O75146|HIP1R_HUMAN	7	7	7	42.746
sp|O75223|GGCT_HUMAN	12	12	66.5	138.35
sp|O75326|SEM7A_HUMAN	7	7	15.6	48.479
sp|O75340|PDCD6_HUMAN	3	3	16.8	22.539
sp|O75342|LX12B_HUMAN	20	20	34.2	184.46
sp|O95670|VATG2_HUMAN	1	1	12.7	16.366
sp|O75351|VPS4B_HUMAN	2	2	5.2	21.638
sp|O75369|FLNB_HUMAN	25	24	13.8	174.46
sp|O75379|VAMP4_HUMAN	1	1	13.5	7.7548
sp|O75396|SC22B_HUMAN	2	2	9.8	12.952
sp|O75436|VP26A_HUMAN	8	8	31.8	84.306
sp|O75460|ERN1_HUMAN	1	1	2.3	7.1054
sp|O75477|ERLN1_HUMAN	4	3	11.6	19.28
sp|O75503|CLN5_HUMAN	6	6	19.6	38.324
sp|O75506|HSBP1_HUMAN	1	1	14.5	7.2617
sp|O75531|BAF_HUMAN	2	2	40.4	19.844
sp|O75534|CSDE1_HUMAN	1	1	2.3	6.8736
sp|O75592|MYCB2_HUMAN	6	6	2.6	82.03
sp|O75608|LYPA1_HUMAN	4	4	25.7	25.967
sp|O75629|CREG1_HUMAN	4	4	20.5	40.851
sp|O75635|SPB7_HUMAN	23	23	61.8	214.04
sp|O75787|RENR_HUMAN	8	8	26.6	51.577
sp|O75832|PSD10_HUMAN	3	3	15	39.804
sp|O75844|FACE1_HUMAN	2	2	7.6	13.118
sp|O75874|IDHC_HUMAN	12	11	39.4	144.16
sp|O75882|ATRN_HUMAN	5	5	4.2	31.697
sp|O75936|BODG_HUMAN	3	3	7.8	16.908
sp|O75964|ATP5L_HUMAN	1	1	10.7	7.6723
sp|O76024|WFS1_HUMAN	1	1	1.6	8.8849
sp|O76027|ANXA9_HUMAN	3	3	11.9	19.005
sp|O76062|ERG24_HUMAN	2	2	5.5	14.016
sp|O76094|SRP72_HUMAN	2	2	3.3	12.54
sp|O94760|DDAH1_HUMAN	15	14	54.4	112.67
sp|O94766|B3GA3_HUMAN	1	1	2.7	6.4609
sp|O94804|STK10_HUMAN	5	5	6.7	33.559
sp|O94832|MYO1D_HUMAN	6	6	7.4	37.691
sp|O94876|TMCC1_HUMAN	2	2	5.1	21.677
sp|O94901|SUN1_HUMAN	11	11	18.1	96.745
sp|O94905|ERLN2_HUMAN	8	7	29.2	70.514
sp|O94919|ENDD1_HUMAN	5	5	18	32.906
sp|O94973|AP2A2_HUMAN	4	4	5.9	39.831
sp|O94979|SC31A_HUMAN	3	3	3.8	19.244
sp|O95070|YIF1A_HUMAN	2	2	9.2	13.227
sp|O95147|DUS14_HUMAN	2	2	18.2	14.474
sp|O95164|UBL3_HUMAN	5	5	51.3	37.474
sp|O95171|SCEL_HUMAN	2	2	3.9	27.066
sp|O95197|RTN3_HUMAN	2	2	2.2	13.057
sp|O95274|LYPD3_HUMAN	2	2	13.3	31.81
sp|O95292|VAPB_HUMAN	1	1	6.6	6.908
sp|O95294|RASL1_HUMAN	6	6	9.1	39.235
sp|O95336|6PGL_HUMAN	5	5	26.4	29.819
sp|O95359|TACC2_HUMAN	1	1	0.5	7.9812
sp|Q309B1|TR16L_HUMAN	1	1	4	7.2854
sp|O95425|SVIL_HUMAN	4	4	2.4	28.2
sp|O95470|SGPL1_HUMAN	9	9	18.1	77.8
sp|O95479|G6PE_HUMAN	9	9	13.4	84.881
sp|O95562|SFT2B_HUMAN	1	1	10.6	28.468
sp|O95714|HERC2_HUMAN	3	3	0.9	18.117
sp|O95721|SNP29_HUMAN	2	2	9.3	17.562
sp|O95757|HS74L_HUMAN	3	2	4.6	22.05
sp|O95782|AP2A1_HUMAN	5	5	5.7	34.91
sp|O95807|TM50A_HUMAN	1	1	5.1	7.1585
sp|O95831|AIFM1_HUMAN	2	2	4.4	12.66
sp|O95833|CLIC3_HUMAN	5	5	29.2	31.558
sp|O95861|BPNT1_HUMAN	2	2	6.2	10.872
sp|O95865|DDAH2_HUMAN	7	6	31.6	85.19
sp|O95867|LY66C_HUMAN	3	3	26.4	29.985
sp|O95969|SG1D2_HUMAN	3	3	22.2	16.167
sp|O96000|NDUBA_HUMAN	2	2	16.9	23.53
sp|O96007|MOC2B_HUMAN	1	1	8	8.2823
sp|O96008|TOM40_HUMAN	5	5	18	32.553
sp|P00167|CYB5_HUMAN	1	1	10.4	6.4124
sp|P00338|LDHA_HUMAN	9	8	28.9	52.779
sp|P00352|AL1A1_HUMAN	8	7	21.8	59.067
sp|P00367|DHE3_HUMAN	5	5	13.8	38.536
sp|P00387|NB5R3_HUMAN	4	4	18.3	23.866
sp|P00390|GSHR_HUMAN	12	12	32.6	124.04
sp|P00403|COX2_HUMAN	2	2	11.5	14.269
sp|P00441|SODC_HUMAN	6	6	64.3	77.587
sp|P00450|CERU_HUMAN	3	3	4.2	20.486
sp|P00491|PNPH_HUMAN	13	13	56.1	151.9
sp|P00492|HPRT_HUMAN	8	8	42.7	50.664
sp|P00505|AATM_HUMAN	8	8	19.5	59.928
sp|P00533|EGFR_HUMAN	9	9	11.2	69.528
sp|P00558|PGK1_HUMAN	12	12	36.5	126.23
sp|P00734|THRB_HUMAN	4	4	9.2	23.393
sp|P00738|HPT_HUMAN	7	7	21.9	50.156
sp|P00746|CFAD_HUMAN	3	3	24.1	18.742
sp|P00747|PLMN_HUMAN	2	2	2.6	11.122
sp|P00751|CFAB_HUMAN	2	2	2.6	10.799
sp|P00813|ADA_HUMAN	5	5	17.1	63.173
sp|P00915|CAH1_HUMAN	8	8	43.7	80.488
sp|P00918|CAH2_HUMAN	4	4	17.3	24.856
sp|P01008|ANT3_HUMAN	7	7	19.4	49.749
sp|P01009|A1AT_HUMAN	10	10	29.4	130
sp|P01011|AACT_HUMAN	7	7	16.8	63.195
sp|P01019|ANGT_HUMAN	2	2	6	12.7
sp|P01023|A2MG_HUMAN	8	8	6.9	71.032
sp|P01024|CO3_HUMAN	22	22	16.8	144.25
sp|P01034|CYTC_HUMAN	1	1	7.5	8.2015
sp|P01036|CYTS_HUMAN	3	2	25.5	39.819
sp|P01037|CYTN_HUMAN	2	1	20.6	14.242
sp|P01040|CYTA_HUMAN	11	11	72.4	238.82
sp|P01042|KNG1_HUMAN	2	2	5.3	14.558
sp|P01116|RASK_HUMAN	4	4	31.7	25.196
sp|P01583|IL1A_HUMAN	4	4	24	37.687
sp|P01591|IGJ_HUMAN	4	4	25.2	26.716
sp|P01593|KVD33_HUMAN	1	1	13.7	7.212
sp|P01780|HV307_HUMAN	2	2	17.1	13.049
sp|P01833|PIGR_HUMAN	11	11	18.7	85.923
sp|P01834|IGKC_HUMAN	7	2	84.1	33.578
sp|P01857|IGHG1_HUMAN	11	4	43.3	177.58
sp|P01859|IGHG2_HUMAN	8	2	33.7	32.722
sp|P01860|IGHG3_HUMAN	8	2	22.8	30.385
sp|P01861|IGHG4_HUMAN	7	2	29.4	13.728
sp|P01876|IGHA1_HUMAN	8	6	25.8	88.61
sp|P01877|IGHA2_HUMAN	5	3	20.6	22.409
sp|P10316|1A69_HUMAN	6	1	19.2	38.754
sp|P01903|DRA_HUMAN	5	5	28	35.022
sp|Q5Y7A7|2B1D_HUMAN	3	1	13.9	20.716
sp|P02042|HBD_HUMAN	9	3	63.9	34.588
sp|P02511|CRYAB_HUMAN	3	3	28.6	22.158
sp|P02545|LMNA_HUMAN	12	12	22.1	86.479
sp|P02647|APOA1_HUMAN	14	13	44.9	162.76
sp|P02652|APOA2_HUMAN	4	4	33	27.986
sp|P02654|APOC1_HUMAN	2	2	13.3	12.007
sp|P02671|FIBA_HUMAN	12	12	22.7	196.57
sp|P02675|FIBB_HUMAN	13	13	36.7	109.34
sp|P02679|FIBG_HUMAN	11	11	32.9	133.15
sp|P02730|B3AT_HUMAN	2	2	3.3	13.01
sp|P02743|SAMP_HUMAN	1	1	4.5	6.6412
sp|P02747|C1QC_HUMAN	2	2	10.2	13.434
sp|P02749|APOH_HUMAN	4	4	17.4	25.261
sp|P02750|A2GL_HUMAN	3	3	10.4	17.639
sp|P02751|FINC_HUMAN	4	4	2.3	27.598
sp|P02760|AMBP_HUMAN	2	2	5.4	11.147
sp|P02763|A1AG1_HUMAN	3	3	21.9	19.786
sp|P02766|TTHY_HUMAN	1	1	15.6	13.783
sp|P02774|VTDB_HUMAN	3	3	5.1	16.303
sp|P02787|TRFE_HUMAN	20	20	30.2	164.71
sp|P02788|TRFL_HUMAN	25	25	39.9	208.6
sp|P02790|HEMO_HUMAN	8	8	24.7	59.026
sp|P02810|PRPC_HUMAN	1	1	10.2	7.209
sp|P04003|C4BPA_HUMAN	3	3	6.2	22.037
sp|P04040|CATA_HUMAN	31	31	54.1	323.31
sp|P04062|GLCM_HUMAN	13	13	30.4	147.5
sp|P04066|FUCO_HUMAN	10	10	23	77.765
sp|P04075|ALDOA_HUMAN	17	15	58	247.06
sp|P04080|CYTB_HUMAN	4	4	70.4	65.989
sp|P04083|ANXA1_HUMAN	9	9	29.2	110.37
sp|P04114|APOB_HUMAN	18	18	5.4	112.98
sp|P04156|PRIO_HUMAN	2	2	9.1	12.591
sp|P04179|SODM_HUMAN	6	6	34.7	60.84
sp|P04217|A1BG_HUMAN	4	4	8.9	25.611
sp|P04279|SEMG1_HUMAN	3	3	7.1	19.939
sp|P04406|G3P_HUMAN	21	21	75.2	323.31
sp|P04424|ARLY_HUMAN	3	3	7.1	18.25
sp|P13746|1A11_HUMAN	5	1	15.9	14.108
sp|P04626|ERBB2_HUMAN	1	1	1	6.4218
sp|P04745|AMY1_HUMAN	9	9	25	70.684
sp|P04792|HSPB1_HUMAN	9	9	52.7	129.56
sp|P04843|RPN1_HUMAN	17	17	36.6	126.5
sp|P04844|RPN2_HUMAN	11	11	27.9	78.469
sp|Q99878|H2A1J_HUMAN	2	2	12.5	14
sp|P05089|ARGI1_HUMAN	20	20	64.6	263.17
sp|P05090|APOD_HUMAN	7	7	27.5	70.918
sp|P05091|ALDH2_HUMAN	3	2	8.1	11.728
sp|P05109|S10A8_HUMAN	6	6	45.2	46.03
sp|P05120|PAI2_HUMAN	13	13	41.2	108.03
sp|P05141|ADT2_HUMAN	7	4	21.5	43.796
sp|P05155|IC1_HUMAN	2	2	3.6	12.009
sp|P05161|ISG15_HUMAN	1	1	7.9	7.3369
sp|P05164|PERM_HUMAN	6	6	12.9	37.864
sp|P05166|PCCB_HUMAN	6	6	17.6	39.587
sp|P05387|RLA2_HUMAN	2	2	17.4	13.109
sp|P05388|RLA0_HUMAN	2	2	9.1	33.543
sp|P05783|K1C18_HUMAN	9	5	24	45.444
sp|P05976|MYL1_HUMAN	2	2	13.9	14.636
sp|P06132|DCUP_HUMAN	8	8	30.5	71.707
sp|P06280|AGAL_HUMAN	7	7	17.7	76.67
sp|P06312|KV401_HUMAN	3	3	24.8	22.757
sp|P06396|GELS_HUMAN	20	20	34.7	318.73
sp|P06576|ATPB_HUMAN	11	11	31.4	96.895
sp|P06702|S10A9_HUMAN	6	6	51.8	57.714
sp|P06727|APOA4_HUMAN	8	8	23.5	55.628
sp|P06730|IF4E_HUMAN	1	1	6.5	7.3346
sp|P31997|CEAM8_HUMAN	1	1	2.6	6.7727
sp|P06732|KCRM_HUMAN	3	3	13.6	40.881
sp|P06733|ENOA_HUMAN	11	10	34.6	99.468
sp|P06737|PYGL_HUMAN	10	8	15.9	62.54
sp|P06748|NPM_HUMAN	6	6	23.8	95.969
sp|P06753|TPM3_HUMAN	3	2	9.5	13.82
sp|P06756|ITAV_HUMAN	5	5	6	28.913
sp|P06865|HEXA_HUMAN	8	8	15.5	60.703
sp|P07108|ACBP_HUMAN	4	4	64.4	52.864
sp|P07195|LDHB_HUMAN	9	8	32	69.957
sp|P07203|GPX1_HUMAN	2	2	16.3	15.355
sp|P07225|PROS_HUMAN	6	6	12.7	39.816
sp|P07237|PDIA1_HUMAN	7	7	17.1	49.066
sp|P07339|CATD_HUMAN	15	15	42.2	137.7
sp|P07355|ANXA2_HUMAN	25	25	73.2	290.53
sp|P07384|CAN1_HUMAN	32	32	45	308.51
sp|P07437|TBB5_HUMAN	7	2	21.2	19.416
sp|P07602|SAP_HUMAN	9	9	16.6	61.064
sp|P07686|HEXB_HUMAN	20	20	41.9	220.52
sp|P07711|CATL1_HUMAN	6	6	20.7	43.264
sp|P07741|APT_HUMAN	2	2	10	12.181
sp|P07814|SYEP_HUMAN	4	4	4.4	25.923
sp|P07858|CATB_HUMAN	11	11	30.4	183.21
sp|P07900|HS90A_HUMAN	13	10	19.1	92.16
sp|P07910|HNRPC_HUMAN	4	4	11.1	25.069
sp|P07954|FUMH_HUMAN	3	3	12.2	21.699
sp|P08174|DAF_HUMAN	7	7	23.9	40.491
sp|P08195|4F2_HUMAN	4	4	9.7	30.174
sp|P08236|BGLR_HUMAN	10	10	16.7	84.671
sp|P08237|PFKAM_HUMAN	1	1	2.2	7.4551
sp|P08238|HS90B_HUMAN	7	3	13.1	28.334
sp|P08294|SODE_HUMAN	2	2	11.2	16.367
sp|P08571|CD14_HUMAN	1	1	5.1	6.77
sp|P08574|CY1_HUMAN	3	3	13.5	21.236
sp|P08582|TRFM_HUMAN	14	14	27.4	117.94
sp|P08603|CFAH_HUMAN	6	6	7.5	37.222
sp|P08670|VIME_HUMAN	9	6	18.5	43.854
sp|P08754|GNAI3_HUMAN	4	3	13.6	25.354
sp|P08758|ANXA5_HUMAN	11	11	35.3	95.498
sp|P08842|STS_HUMAN	16	16	31.6	139.01
sp|P08865|RSSA_HUMAN	5	5	22.7	33.743
sp|P09104|ENOG_HUMAN	6	5	22.1	33.566
sp|P09110|THIK_HUMAN	7	7	24.5	47.591
sp|P09211|GSTP1_HUMAN	8	8	51.9	92.562
sp|P09237|MMP7_HUMAN	2	2	9.7	11.566
sp|P09382|LEG1_HUMAN	2	2	17.8	12.061
sp|P09455|RET1_HUMAN	1	1	8.9	8.2528
sp|P09467|F16P1_HUMAN	4	4	16.3	29.72
sp|P09525|ANXA4_HUMAN	11	11	35.7	91.603
sp|P09543|CN37_HUMAN	5	5	11.6	34.115
sp|P09601|HMOX1_HUMAN	8	8	42	65.68
sp|P09622|DLDH_HUMAN	7	7	16.1	51.148
sp|P09651|ROA1_HUMAN	3	3	10.2	22.983
sp|P09668|CATH_HUMAN	10	10	29.6	85.44
sp|P09758|TACD2_HUMAN	1	1	5	7.099
sp|P09958|FURIN_HUMAN	3	3	6.7	18.604
sp|P09960|LKHA4_HUMAN	7	7	16	71.535
sp|P09972|ALDOC_HUMAN	11	9	44.2	96.98
sp|P0C0L5|CO4B_HUMAN	8	7	7.7	50.697
sp|P0C869|PA24B_HUMAN	4	4	6.7	24.553
sp|P0C870|JMJD7_HUMAN	6	6	24.4	41.352
sp|P0DOY3|IGLC3_HUMAN	3	1	46.2	83.991
sp|P62987|RL40_HUMAN	7	7	37.5	82.965
sp|P0DJI8|SAA1_HUMAN	1	1	16.4	11.305
sp|P0DMV8|HS71A_HUMAN	16	7	28.9	125.35
sp|P0DOX6|IGM_HUMAN	6	1	10.4	38.39
sp|P0DOX7|IGK_HUMAN	7	2	50.5	137.71
sp|P0DP23|CALM1_HUMAN	4	2	26.8	51.602
sp|P0DPA2|VSIG8_HUMAN	4	4	8.7	24.245
sp|P10155|RO60_HUMAN	13	13	31.2	96.614
sp|P10253|LYAG_HUMAN	16	16	19.9	216.86
sp|P10515|ODP2_HUMAN	2	2	4.5	14.478
sp|P10599|THIO_HUMAN	8	8	54.3	65.72
sp|P10619|PPGB_HUMAN	7	7	19	242.81
sp|P10768|ESTD_HUMAN	5	5	24.1	36.693
sp|P10809|CH60_HUMAN	17	17	41.5	136.65
sp|P10909|CLUS_HUMAN	9	9	20.9	101.64
sp|P11021|BIP_HUMAN	17	16	27.8	163.84
sp|P12883|MYH7_HUMAN	2	2	1.7	12.262
sp|P11117|PPAL_HUMAN	3	3	10.9	20.722
sp|P11142|HSP7C_HUMAN	19	12	36.1	197.45
sp|P11177|ODPB_HUMAN	3	3	11.1	18.537
sp|P11182|ODB2_HUMAN	2	2	3.7	11.852
sp|P11216|PYGB_HUMAN	7	5	10.2	29.632
sp|P11233|RALA_HUMAN	3	3	19.4	30.179
sp|P11279|LAMP1_HUMAN	6	6	15.6	41.411
sp|P11413|G6PD_HUMAN	5	5	8.5	27.723
sp|P11717|MPRI_HUMAN	2	2	1.1	13.234
sp|P60891|PRPS1_HUMAN	1	1	5.3	6.4139
sp|P11940|PABP1_HUMAN	3	3	6.1	18.092
sp|P12081|SYHC_HUMAN	12	9	29.3	105.43
sp|P12109|CO6A1_HUMAN	1	1	1.4	6.7282
sp|P12268|IMDH2_HUMAN	11	11	27.2	117.7
sp|P12273|PIP_HUMAN	10	10	62.3	99.658
sp|P12277|KCRB_HUMAN	5	5	18.1	32.016
sp|P12429|ANXA3_HUMAN	5	5	17	34.359
sp|P12532|KCRU_HUMAN	6	6	15.8	42.948
sp|P12814|ACTN1_HUMAN	11	4	14.1	23.844
sp|P12821|ACE_HUMAN	3	3	3.1	20.397
sp|P12830|CADH1_HUMAN	3	3	4.6	43.43
sp|P12955|PEPD_HUMAN	14	14	29	251.11
sp|P12956|XRCC6_HUMAN	3	3	8	20.501
sp|P13010|XRCC5_HUMAN	3	3	4.8	16.396
sp|P13284|GILT_HUMAN	4	4	22.4	54.905
sp|P13473|LAMP2_HUMAN	3	3	9.3	28.565
sp|P13489|RINI_HUMAN	7	7	19.3	46.362
sp|P13639|EF2_HUMAN	20	20	28	223.24
sp|P13667|PDIA4_HUMAN	3	3	5.6	18.02
sp|P13693|TCTP_HUMAN	3	3	19.8	20.879
sp|P13716|HEM2_HUMAN	15	15	48.5	153.33
sp|P13761|2B17_HUMAN	4	1	15	24.731
sp|P13796|PLSL_HUMAN	26	22	44.8	235.28
sp|P13797|PLST_HUMAN	17	13	33.3	100
sp|P13798|ACPH_HUMAN	17	17	33.1	274.93
sp|P13804|ETFA_HUMAN	2	2	8.7	11.803
sp|P13987|CD59_HUMAN	3	3	25	30.821
sp|P14174|MIF_HUMAN	1	1	9.6	10.864
sp|P14314|GLU2B_HUMAN	3	3	8.3	21.323
sp|P14384|CBPM_HUMAN	11	11	27.8	167.39
sp|P14406|CX7A2_HUMAN	2	2	27.7	14.639
sp|P14550|AK1A1_HUMAN	4	4	13.2	21.732
sp|P14618|KPYM_HUMAN	21	21	41.8	270.95
sp|P14625|ENPL_HUMAN	6	5	10.1	52.261
sp|P63162|RSMN_HUMAN	4	4	15.8	24.003
sp|P14735|IDE_HUMAN	24	24	25.6	170.38
sp|P14866|HNRPL_HUMAN	1	1	2.9	6.4318
sp|P14868|SYDC_HUMAN	4	4	7.4	26.549
sp|P14923|PLAK_HUMAN	30	30	58.9	323.31
sp|P15104|GLNA_HUMAN	5	5	19	36.354
sp|P15170|ERF3A_HUMAN	3	3	6.8	19.744
sp|P15289|ARSA_HUMAN	9	8	24.1	73.699
sp|P15291|B4GT1_HUMAN	2	2	7.8	12.101
sp|P15309|PPAP_HUMAN	11	11	28	74.844
sp|P15311|EZRI_HUMAN	7	4	13.1	43.773
sp|P15313|VATB1_HUMAN	4	2	10.9	13.911
sp|P15408|FOSL2_HUMAN	1	1	7.4	6.433
sp|P15531|NDKA_HUMAN	6	2	43.4	43.437
sp|P15586|GNS_HUMAN	8	8	19.6	50.735
sp|P15848|ARSB_HUMAN	2	2	5.1	10.654
sp|P15924|DESP_HUMAN	111	111	40.4	323.31
sp|P16035|TIMP2_HUMAN	4	4	16.8	25.139
sp|P16070|CD44_HUMAN	1	1	1.6	7.0809
sp|P16083|NQO2_HUMAN	6	6	28.6	66.38
sp|P16144|ITB4_HUMAN	1	1	0.8	14.465
sp|P16152|CBR1_HUMAN	6	4	26.4	61.012
sp|P16157|ANK1_HUMAN	2	2	1.6	12.234
sp|P16278|BGAL_HUMAN	12	11	26.1	105.35
sp|P16435|NCPR_HUMAN	4	4	9.3	46.641
sp|P16615|AT2A2_HUMAN	7	7	9	52.405
sp|P16870|CBPE_HUMAN	13	13	36.3	132.07
sp|P16930|FAAA_HUMAN	7	7	21	51.768
sp|P17050|NAGAB_HUMAN	6	6	18.7	66.283
sp|P17174|AATC_HUMAN	16	16	55	178.81
sp|P17405|ASM_HUMAN	3	3	5.7	17.366
sp|Q04828|AK1C1_HUMAN	2	2	5.3	11.626
sp|P17655|CAN2_HUMAN	3	3	4.1	23.79
sp|P17858|PFKAL_HUMAN	2	2	3.6	13.831
sp|P17900|SAP3_HUMAN	7	7	34.7	52.75
sp|P17931|LEG3_HUMAN	8	8	28	65.196
sp|P17980|PRS6A_HUMAN	3	3	9.1	18.667
sp|P17987|TCPA_HUMAN	3	3	7.4	19.314
sp|P18054|LOX12_HUMAN	6	6	12.1	39.586
sp|P18085|ARF4_HUMAN	6	3	31.1	80.981
sp|P18206|VINC_HUMAN	22	22	24.4	237.46
sp|P18510|IL1RA_HUMAN	4	4	23.7	56.895
sp|P18583|SON_HUMAN	6	6	2.7	35.3
sp|P18669|PGAM1_HUMAN	5	5	31.9	33.92
sp|P19021|AMD_HUMAN	2	2	1.7	11.051
sp|P19224|UD16_HUMAN	3	3	6.6	17.688
sp|P19784|CSK22_HUMAN	2	2	7.1	11.957
sp|P19823|ITIH2_HUMAN	7	7	9.2	44.541
sp|P19827|ITIH1_HUMAN	5	5	9.3	34.387
sp|P19957|ELAF_HUMAN	2	2	16.2	11.857
sp|P19971|TYPH_HUMAN	8	8	18.3	66.862
sp|P20036|DPA1_HUMAN	1	1	4.6	6.9068
sp|P20061|TCO1_HUMAN	1	1	4.4	7.9803
sp|P20073|ANXA7_HUMAN	13	13	24.4	127.24
sp|P20336|RAB3A_HUMAN	2	1	10.5	7.6844
sp|P20339|RAB5A_HUMAN	5	3	31.6	51.965
sp|P20340|RAB6A_HUMAN	7	7	39.9	52.013
sp|P20618|PSB1_HUMAN	10	10	60.2	134.59
sp|P20645|MPRD_HUMAN	2	2	9.7	15.159
sp|P20674|COX5A_HUMAN	4	4	28	29.728
sp|P20810|ICAL_HUMAN	3	3	7.2	41.665
sp|P20839|IMDH1_HUMAN	3	3	9.5	24.674
sp|P20933|ASPG_HUMAN	5	5	20.8	125.18
sp|P21128|ENDOU_HUMAN	4	4	13.2	23.853
sp|P21266|GSTM3_HUMAN	4	4	21.3	30.892
sp|P21281|VATB2_HUMAN	6	4	15.9	40.596
sp|P21333|FLNA_HUMAN	28	28	16.2	323.31
sp|P21399|ACOC_HUMAN	3	3	5.8	19.754
sp|P21796|VDAC1_HUMAN	10	10	42	118.02
sp|P21926|CD9_HUMAN	1	1	4.4	7.4339
sp|P21964|COMT_HUMAN	3	3	11.4	18.085
sp|P22061|PIMT_HUMAN	2	2	14.5	14.039
sp|P22102|PUR2_HUMAN	11	11	17.1	84.437
sp|P22234|PUR6_HUMAN	13	13	32.5	90.086
sp|P22304|IDS_HUMAN	11	11	27.6	93.104
sp|P22314|UBA1_HUMAN	9	9	12.3	90.281
sp|P22392|NDKB_HUMAN	5	1	40.1	7.6409
sp|P22531|SPR2E_HUMAN	3	1	54.2	28.53
sp|P35325|SPR2B_HUMAN	3	1	54.2	7.4022
sp|P22626|ROA2_HUMAN	2	2	7.1	13.519
sp|P22695|QCR2_HUMAN	10	10	29.1	66.107
sp|P22735|TGM1_HUMAN	24	24	37.3	248.53
sp|P22760|AAAD_HUMAN	8	8	25.1	59.374
sp|P23219|PGH1_HUMAN	10	10	18.9	82.496
sp|P23280|CAH6_HUMAN	5	5	20.1	43.053
sp|P23284|PPIB_HUMAN	3	3	13.4	18.294
sp|P23381|SYWC_HUMAN	2	2	7	19.222
sp|P23396|RS3_HUMAN	3	3	12.3	19.2
sp|P23490|LORI_HUMAN	3	3	10.3	32.532
sp|P23526|SAHH_HUMAN	13	13	25.9	109.29
sp|P23528|COF1_HUMAN	4	4	35.5	27.666
sp|P23634|AT2B4_HUMAN	2	2	2.3	11.503
sp|P24158|PRTN3_HUMAN	2	2	14.1	14.71
sp|P24298|ALAT1_HUMAN	14	14	40.9	171.58
sp|P24534|EF1B_HUMAN	2	2	12.4	27.255
sp|P24666|PPAC_HUMAN	4	4	36.7	24.442
sp|P24752|THIL_HUMAN	3	3	9.1	21.527
sp|P25311|ZA2G_HUMAN	20	20	65.8	301.04
sp|P25398|RS12_HUMAN	2	2	14.4	10.9
sp|P25705|ATPA_HUMAN	7	7	16.5	47.666
sp|P25774|CATS_HUMAN	2	2	7.3	14.391
sp|P25786|PSA1_HUMAN	10	10	38	189.7
sp|P25787|PSA2_HUMAN	11	11	61.5	95.564
sp|P25788|PSA3_HUMAN	12	12	48.6	128.4
sp|P25789|PSA4_HUMAN	12	12	54.4	109.5
sp|P25815|S100P_HUMAN	3	3	33.7	20.181
sp|P26038|MOES_HUMAN	6	3	11.1	19.338
sp|P26196|DDX6_HUMAN	4	4	11.2	24.464
sp|P26447|S10A4_HUMAN	2	2	19.8	15.397
sp|P26599|PTBP1_HUMAN	1	1	3.8	8.2582
sp|P26639|SYTC_HUMAN	3	3	5.5	17.914
sp|P26640|SYVC_HUMAN	3	3	2.8	19.351
sp|P26641|EF1G_HUMAN	5	5	12.1	34.186
sp|P27105|STOM_HUMAN	3	3	13.5	20.471
sp|P27348|1433T_HUMAN	7	3	24.1	18.823
sp|P27361|MK03_HUMAN	3	3	9.2	18.057
sp|P27449|VATL_HUMAN	1	1	11.6	18.671
sp|P27482|CALL3_HUMAN	4	2	32.2	28.678
sp|P27487|DPP4_HUMAN	10	10	15.9	68.026
sp|P27797|CALR_HUMAN	2	2	7.2	11.503
sp|P27824|CALX_HUMAN	10	10	15.9	99.133
sp|P27930|IL1R2_HUMAN	4	4	10.6	28.989
sp|P28062|PSB8_HUMAN	11	11	51.8	130.91
sp|P28065|PSB9_HUMAN	6	6	34.2	42.394
sp|P28066|PSA5_HUMAN	11	11	65.1	310.62
sp|P28070|PSB4_HUMAN	6	6	35.6	261.47
sp|P28072|PSB6_HUMAN	7	7	26.8	76.896
sp|P28074|PSB5_HUMAN	7	7	26.2	74.28
sp|P28288|ABCD3_HUMAN	2	2	4.4	10.837
sp|P28331|NDUS1_HUMAN	2	2	5	12.045
sp|P28347|TEAD1_HUMAN	4	4	8.9	25.836
sp|P28676|GRAN_HUMAN	3	3	15.2	17.604
sp|P28799|GRN_HUMAN	3	3	5.9	17.749
sp|P28838|AMPL_HUMAN	5	5	11.4	30.838
sp|P28845|DHI1_HUMAN	1	1	4.5	6.9721
sp|P29144|TPP2_HUMAN	2	2	2.7	12.061
sp|P29218|IMPA1_HUMAN	9	9	36.1	57.606
sp|P29373|RABP2_HUMAN	2	2	16.7	15.468
sp|P29401|TKT_HUMAN	18	18	41.6	204.94
sp|P29508|SPB3_HUMAN	18	9	49.2	323.31
sp|P29692|EF1D_HUMAN	3	3	13.9	25.469
sp|P30041|PRDX6_HUMAN	8	8	39.3	53.258
sp|P30043|BLVRB_HUMAN	2	2	15.5	34.109
sp|P30044|PRDX5_HUMAN	3	3	15.4	18.983
sp|P30047|GFRP_HUMAN	3	3	40.5	36.314
sp|P30048|PRDX3_HUMAN	7	7	28.5	49.985
sp|P30084|ECHM_HUMAN	3	3	14.5	20.059
sp|P30085|KCY_HUMAN	1	1	6.6	6.878
sp|P30086|PEBP1_HUMAN	11	11	74.9	206.76
sp|P30101|PDIA3_HUMAN	8	8	20.6	45.372
sp|P30153|2AAA_HUMAN	3	3	7.8	17.584
sp|P30461|1B13_HUMAN	4	0	13.8	7.6674
sp|P30510|1C14_HUMAN	5	0	17.5	7.3526
sp|P30626|SORCN_HUMAN	9	9	49.5	62.419
sp|P30740|ILEU_HUMAN	11	10	34.3	133.3
sp|P30838|AL3A1_HUMAN	5	4	14.6	32.856
sp|P31025|LCN1_HUMAN	5	5	24.4	36.332
sp|P31146|COR1A_HUMAN	1	1	3.5	6.6258
sp|P31150|GDIA_HUMAN	17	10	43.8	92.331
sp|P31151|S10A7_HUMAN	8	4	48.5	82.356
sp|P31153|METK2_HUMAN	1	1	3.8	8.1646
sp|Q01085|TIAR_HUMAN	1	1	3.5	6.7542
sp|P31930|QCR1_HUMAN	7	7	17.9	54.763
sp|P31937|3HIDH_HUMAN	3	3	10.4	20.835
sp|P31942|HNRH3_HUMAN	1	1	3.5	11.491
sp|P31944|CASPE_HUMAN	23	23	66.1	323.31
sp|P31946|1433B_HUMAN	6	2	24	25.55
sp|P31947|1433S_HUMAN	9	7	40.3	60.405
sp|P31949|S10AB_HUMAN	2	2	23.8	12.993
sp|P32119|PRDX2_HUMAN	11	10	56.1	118.94
sp|P32320|CDD_HUMAN	6	6	69.2	48.271
sp|P32418|NAC1_HUMAN	1	1	2.4	6.8907
sp|P32926|DSG3_HUMAN	3	3	3.8	18.171
sp|P33121|ACSL1_HUMAN	7	7	10.5	40.456
sp|P33176|KINH_HUMAN	6	6	8.8	40.346
sp|P33764|S10A3_HUMAN	3	3	38.6	27.656
sp|P34059|GALNS_HUMAN	6	5	12.6	52.818
sp|P34896|GLYC_HUMAN	1	1	3.3	6.9926
sp|P34932|HSP74_HUMAN	2	1	4	7.2133
sp|P35052|GPC1_HUMAN	1	1	2.5	17.885
sp|P35221|CTNA1_HUMAN	8	8	11.9	51.552
sp|P35232|PHB_HUMAN	4	4	22.4	26.528
sp|P35237|SPB6_HUMAN	14	13	45.2	139.46
sp|P35247|SFTPD_HUMAN	1	1	4	7.2086
sp|P35268|RL22_HUMAN	2	2	18.8	11.775
sp|P35270|SPRE_HUMAN	5	5	26.4	35.419
sp|P35321|SPR1A_HUMAN	2	2	36	35.117
sp|P35475|IDUA_HUMAN	3	3	4.4	17.18
sp|P35573|GDE_HUMAN	23	23	19.1	153.44
sp|P35579|MYH9_HUMAN	24	19	16.3	246.07
sp|P35580|MYH10_HUMAN	5	2	3.8	11.552
sp|P35606|COPB2_HUMAN	13	13	15.9	127.68
sp|P35754|GLRX1_HUMAN	3	3	31.1	58.562
sp|P35908|K22E_HUMAN	89	1	87.6	185.43
sp|P35914|HMGCL_HUMAN	2	2	5.2	11.198
sp|P35998|PRS7_HUMAN	3	3	7.9	18.282
sp|P36222|CH3L1_HUMAN	10	10	32.1	65.012
sp|P36543|VATE1_HUMAN	2	2	11.1	12.9
sp|P36952|SPB5_HUMAN	10	10	32.5	129.01
sp|P36957|ODO2_HUMAN	4	4	10.4	48.553
sp|P36969|GPX4_HUMAN	1	1	7.1	6.8296
sp|P37802|TAGL2_HUMAN	6	6	37.7	43.512
sp|P37837|TALDO_HUMAN	10	10	29.4	74.088
sp|P37840|SYUA_HUMAN	1	1	11.4	6.4085
sp|P38571|LICH_HUMAN	3	3	11.5	18.256
sp|P38606|VATA_HUMAN	12	12	26.9	96.001
sp|P38646|GRP75_HUMAN	5	5	9.9	29.563
sp|P39656|OST48_HUMAN	6	6	13.8	36.222
sp|P40121|CAPG_HUMAN	5	5	16.7	35.099
sp|P40199|CEAM6_HUMAN	1	1	6.1	7.3585
sp|P40227|TCPZ_HUMAN	4	4	8.5	25.742
sp|P40305|IFI27_HUMAN	1	1	13.1	7.3218
sp|P40306|PSB10_HUMAN	4	4	17.6	56.127
sp|P40925|MDHC_HUMAN	5	5	19.5	35.2
sp|P40926|MDHM_HUMAN	12	12	49.7	111.61
sp|P40939|ECHA_HUMAN	4	4	7.2	31.62
sp|P40967|PMEL_HUMAN	1	1	2.3	7.0046
sp|P41091|IF2G_HUMAN	2	2	6.4	14.022
sp|P41250|GARS_HUMAN	2	2	4.3	12.094
sp|P41252|SYIC_HUMAN	2	2	2.1	10.451
sp|P41567|EIF1_HUMAN	2	2	36.3	13.469
sp|P42224|STAT1_HUMAN	2	2	3.7	12.454
sp|P42357|HUTH_HUMAN	26	26	49.2	323.31
sp|P42765|THIM_HUMAN	2	2	5.5	12.195
sp|P42785|PCP_HUMAN	12	12	26.6	105.69
sp|P43034|LIS1_HUMAN	4	4	12	32.817
sp|P43251|BTD_HUMAN	3	3	5.5	16.316
sp|P43304|GPDM_HUMAN	4	4	6.7	22.845
sp|P43307|SSRA_HUMAN	3	3	14	40.271
sp|P43490|NAMPT_HUMAN	4	4	13.8	26.519
sp|P43686|PRS6B_HUMAN	5	5	12.7	43.509
sp|P45880|VDAC2_HUMAN	8	8	34	72.61
sp|P45974|UBP5_HUMAN	5	5	9.4	32.681
sp|P46063|RECQ1_HUMAN	2	2	4	11.016
sp|P46109|CRKL_HUMAN	1	1	5	8.9075
sp|P46379|BAG6_HUMAN	2	2	2.7	13.206
sp|P46459|NSF_HUMAN	6	6	9.4	37.02
sp|P46736|BRCC3_HUMAN	6	6	19.3	37.661
sp|P46776|RL27A_HUMAN	2	2	14.2	10.571
sp|P46777|RL5_HUMAN	1	1	5.7	6.9815
sp|P46782|RS5_HUMAN	2	2	4.9	10.767
sp|P46926|GNPI1_HUMAN	8	4	39.4	40.739
sp|P46940|IQGA1_HUMAN	22	21	17.5	172.29
sp|P46977|STT3A_HUMAN	6	6	7.5	34.875
sp|P47755|CAZA2_HUMAN	5	3	31.5	22.133
sp|P47756|CAPZB_HUMAN	6	6	29.2	68.536
sp|P47895|AL1A3_HUMAN	3	2	6.2	10.884
sp|P47897|SYQ_HUMAN	2	2	3	12.665
sp|P47929|LEG7_HUMAN	8	8	72.8	120.26
sp|P48147|PPCE_HUMAN	5	5	10.8	31.4
sp|P48163|MAOX_HUMAN	17	17	37.1	274.83
sp|P48426|PI42A_HUMAN	1	1	3.4	7.4937
sp|P48444|COPD_HUMAN	2	2	5.3	11.594
sp|P48449|ERG7_HUMAN	11	11	19.4	78.85
sp|P48556|PSMD8_HUMAN	1	1	4.6	7.7235
sp|P48594|SPB4_HUMAN	11	2	25.9	13.075
sp|P48595|SPB10_HUMAN	3	3	10.3	21.567
sp|P48637|GSHB_HUMAN	19	19	49.4	163.55
sp|P48643|TCPE_HUMAN	4	4	5.9	23.134
sp|P48651|PTSS1_HUMAN	2	2	6.6	13.808
sp|P48723|HSP13_HUMAN	2	2	5.5	10.987
sp|P48735|IDHP_HUMAN	3	2	8.2	12.097
sp|P48739|PIPNB_HUMAN	1	1	4.8	7.4813
sp|P49189|AL9A1_HUMAN	10	10	24.3	78.017
sp|P49247|RPIA_HUMAN	9	9	34.1	79.021
sp|P49257|LMAN1_HUMAN	4	4	13.3	31.371
sp|P49327|FAS_HUMAN	32	32	18.5	274.31
sp|P49368|TCPG_HUMAN	6	6	12.3	34.214
sp|P49411|EFTU_HUMAN	2	2	6.2	13.591
sp|P49419|AL7A1_HUMAN	16	16	40.4	163.23
sp|P49589|SYCC_HUMAN	2	2	3.3	14.33
sp|P49720|PSB3_HUMAN	12	12	59.5	115.49
sp|P49721|PSB2_HUMAN	10	10	40.8	149.83
sp|P49748|ACADV_HUMAN	9	9	14.8	93.893
sp|P49754|VPS41_HUMAN	2	2	2.1	11.528
sp|P49755|TMEDA_HUMAN	8	8	34.7	143.6
sp|P49862|KLK7_HUMAN	10	10	34.8	134.76
sp|P49903|SPS1_HUMAN	2	2	7.7	13.734
sp|P50053|KHK_HUMAN	1	1	4	7.4227
sp|P50148|GNAQ_HUMAN	2	2	7.2	11.856
sp|P50395|GDIB_HUMAN	24	17	53	214.63
sp|P50440|GATM_HUMAN	1	1	3.5	6.6259
sp|P50452|SPB8_HUMAN	18	16	41.4	166.25
sp|P50453|SPB9_HUMAN	7	6	25.3	42.137
sp|Q8IZP2|ST134_HUMAN	2	2	9.6	11.977
sp|P50552|VASP_HUMAN	3	3	6.6	20.873
sp|P50570|DYN2_HUMAN	2	2	2	11.364
sp|P50579|MAP2_HUMAN	6	6	14.6	47.862
sp|P50897|PPT1_HUMAN	5	5	18.6	48.982
sp|P50990|TCPQ_HUMAN	6	6	13.1	36.832
sp|P50991|TCPD_HUMAN	4	4	10.4	25.463
sp|P50995|ANX11_HUMAN	13	13	28.3	101.74
sp|P51148|RAB5C_HUMAN	4	2	25	15.767
sp|P51149|RAB7A_HUMAN	7	7	41.5	53.556
sp|P51151|RAB9A_HUMAN	2	2	12.4	13.091
sp|P51153|RAB13_HUMAN	3	1	14.3	12.093
sp|P51178|PLCD1_HUMAN	3	3	6.5	18.776
sp|P51570|GALK1_HUMAN	2	2	6.1	11.461
sp|P51571|SSRD_HUMAN	5	5	31.2	59.99
sp|P51572|BAP31_HUMAN	3	3	17.9	36.391
sp|P51610|HCFC1_HUMAN	3	3	1.5	18.563
sp|P51648|AL3A2_HUMAN	10	9	21.4	71.93
sp|P51659|DHB4_HUMAN	13	13	21.2	86.656
sp|P51688|SPHM_HUMAN	13	13	36.1	130.73
sp|P51991|ROA3_HUMAN	3	3	11.1	21.455
sp|P52209|6PGD_HUMAN	3	3	10.6	21.191
sp|P52272|HNRPM_HUMAN	5	5	7.3	29.644
sp|P52565|GDIR1_HUMAN	1	1	5.4	6.421
sp|P52566|GDIR2_HUMAN	2	2	10.4	12.059
sp|P52655|TF2AA_HUMAN	2	2	5.3	12.306
sp|P52657|T2AG_HUMAN	1	1	8.3	6.7931
sp|P52758|RIDA_HUMAN	4	4	40.9	42.453
sp|P52888|THOP1_HUMAN	8	8	12	53.676
sp|P52907|CAZA1_HUMAN	6	4	33.9	67.3
sp|P53004|BIEA_HUMAN	4	4	16.6	23.839
sp|P53396|ACLY_HUMAN	6	6	7.5	36.583
sp|P53621|COPA_HUMAN	2	2	3	12.317
sp|P53634|CATC_HUMAN	9	9	24.6	84.118
sp|P54108|CRIS3_HUMAN	1	1	3.3	6.719
sp|P54136|SYRC_HUMAN	6	6	8.6	33.481
sp|P54652|HSP72_HUMAN	17	9	32.2	100.28
sp|P54727|RD23B_HUMAN	2	2	5.1	13.235
sp|P54793|ARSF_HUMAN	10	10	22.4	68.868
sp|P54802|ANAG_HUMAN	8	8	14.7	52.928
sp|P54803|GALC_HUMAN	5	5	9.6	34.642
sp|P54920|SNAA_HUMAN	4	4	16.9	30.854
sp|P55000|SLUR1_HUMAN	3	3	66	22.559
sp|P55036|PSMD4_HUMAN	1	1	2.7	6.584
sp|P55072|TERA_HUMAN	13	13	22.8	96.422
sp|P55145|MANF_HUMAN	5	5	29.7	59.93
sp|P55199|ELL_HUMAN	2	2	5	13.199
sp|P55735|SEC13_HUMAN	1	1	3.4	6.8126
sp|P55786|PSA_HUMAN	30	30	32.4	207.05
sp|P55795|HNRH2_HUMAN	5	4	12.9	33.127
sp|P55808|XG_HUMAN	1	1	11.7	7.5075
sp|P55884|EIF3B_HUMAN	2	2	3.3	13.218
sp|P56192|SYMC_HUMAN	2	2	2.8	11.433
sp|P56537|IF6_HUMAN	7	7	52.2	81.629
sp|P57088|TMM33_HUMAN	5	5	19.4	35.192
sp|P57735|RAB25_HUMAN	3	2	14.1	11.636
sp|P58107|EPIPL_HUMAN	57	52	33.1	323.31
sp|P59666|DEF3_HUMAN	3	3	20.2	19.653
sp|P59998|ARPC4_HUMAN	1	1	6.5	8.6347
sp|P60174|TPIS_HUMAN	16	16	71	197.03
sp|P60228|EIF3E_HUMAN	2	2	4.7	11.722
sp|P60468|SC61B_HUMAN	2	2	27.1	12.827
sp|P60660|MYL6_HUMAN	3	3	19.9	26.658
sp|P63261|ACTG_HUMAN	18	9	57.3	243.34
sp|P60842|IF4A1_HUMAN	12	12	39.4	77.716
sp|P60900|PSA6_HUMAN	15	15	64.2	156.22
sp|P60903|S10AA_HUMAN	3	3	35.1	41.297
sp|P60953|CDC42_HUMAN	4	4	26.7	25.149
sp|P60981|DEST_HUMAN	1	1	6.7	10.444
sp|P60985|KTDAP_HUMAN	3	3	27.3	20.657
sp|P61009|SPCS3_HUMAN	2	2	10	12.485
sp|P61019|RAB2A_HUMAN	5	5	29.7	36.915
sp|P61020|RAB5B_HUMAN	5	3	31.6	36.333
sp|P61026|RAB10_HUMAN	3	2	22.5	13.147
sp|P61106|RAB14_HUMAN	9	9	54.9	64.565
sp|P61158|ARP3_HUMAN	5	5	17.5	37.948
sp|P61160|ARP2_HUMAN	6	6	16.5	37.981
sp|P61163|ACTZ_HUMAN	1	1	5.9	7.394
sp|P84077|ARF1_HUMAN	5	1	30.4	6.4627
sp|P61221|ABCE1_HUMAN	3	3	6.3	18.584
sp|P61224|RAP1B_HUMAN	3	1	22.3	8.5288
sp|P61247|RS3A_HUMAN	2	2	11.4	12.122
sp|P61313|RL15_HUMAN	1	1	6.9	7.3926
sp|P61421|VA0D1_HUMAN	5	5	20.2	39.906
sp|P61457|PHS_HUMAN	4	4	32.7	27.646
sp|P61604|CH10_HUMAN	4	4	45.1	27.373
sp|P61619|S61A1_HUMAN	5	5	9.7	29.689
sp|P61626|LYSC_HUMAN	2	2	12.8	14.466
sp|P61769|B2MG_HUMAN	1	1	8.4	6.8752
sp|P61803|DAD1_HUMAN	3	3	26.5	26.54
sp|P61916|NPC2_HUMAN	4	4	22.5	43.003
sp|P61962|DCAF7_HUMAN	6	6	22.8	47.161
sp|P61964|WDR5_HUMAN	6	6	24	39.031
sp|P61970|NTF2_HUMAN	4	4	51.2	34.409
sp|P62070|RRAS2_HUMAN	1	1	5.9	7.0423
sp|P62136|PP1A_HUMAN	7	7	27.3	45.552
sp|P62166|NCS1_HUMAN	2	2	11.6	13.89
sp|P62191|PRS4_HUMAN	1	1	3.4	7.3046
sp|P62195|PRS8_HUMAN	2	2	8.6	14.556
sp|P62241|RS8_HUMAN	2	2	10.6	16.665
sp|P62244|RS15A_HUMAN	1	1	10.8	7.2087
sp|P62258|1433E_HUMAN	6	4	25.9	27.453
sp|P62263|RS14_HUMAN	2	2	18.5	11.347
sp|P62304|RUXE_HUMAN	2	2	25	13.426
sp|P62306|RUXF_HUMAN	3	3	27.9	20.798
sp|P62314|SMD1_HUMAN	4	4	52.9	27.395
sp|P62316|SMD2_HUMAN	3	3	23.7	27.16
sp|P62318|SMD3_HUMAN	4	4	36.5	25.899
sp|P62333|PRS10_HUMAN	3	3	10.5	17.572
sp|P62341|SELT_HUMAN	2	2	11.8	12.572
sp|P62491|RB11A_HUMAN	5	4	26.4	35.767
sp|P62699|YPEL5_HUMAN	3	3	29.8	17.452
sp|P67775|PP2AA_HUMAN	3	3	12.9	21.991
sp|P62805|H4_HUMAN	4	4	40.8	25.287
sp|P62820|RAB1A_HUMAN	7	3	50.7	64.697
sp|P62826|RAN_HUMAN	2	2	10.2	19.988
sp|P62834|RAP1A_HUMAN	3	1	22.3	34.156
sp|P62873|GBB1_HUMAN	8	5	29.7	63.822
sp|P62879|GBB2_HUMAN	7	3	31.8	31.294
sp|P62913|RL11_HUMAN	2	2	12.4	13.062
sp|P62937|PPIA_HUMAN	6	6	58.2	38.93
sp|P62942|FKB1A_HUMAN	1	1	13	8.2451
sp|P63010|AP2B1_HUMAN	6	2	5.7	13.292
sp|P63027|VAMP2_HUMAN	2	2	14.7	17.342
sp|P63098|CANB1_HUMAN	5	5	29.4	32.368
sp|P63104|1433Z_HUMAN	8	4	24.1	51.772
sp|P63151|2ABA_HUMAN	5	5	16.8	39.284
sp|Q96FJ2|DYL2_HUMAN	1	1	12.4	8.1296
sp|P63172|DYLT1_HUMAN	1	1	14.2	7.8504
sp|P63220|RS21_HUMAN	2	2	32.5	12.369
sp|P63241|IF5A1_HUMAN	3	3	35.1	21.03
sp|P63244|RACK1_HUMAN	8	8	29.3	71.524
sp|P67812|SC11A_HUMAN	3	3	16.2	21.686
sp|P67936|TPM4_HUMAN	4	2	11.7	29.126
sp|P68032|ACTC_HUMAN	14	5	39	62.787
sp|Q5VTE0|EF1A3_HUMAN	10	10	30.7	110.96
sp|P68363|TBA1B_HUMAN	14	0	39.7	135.32
sp|P68366|TBA4A_HUMAN	13	3	37.9	18.919
sp|P68371|TBB4B_HUMAN	6	1	17.8	27.142
sp|Q6NXT2|H3C_HUMAN	2	2	11.9	11.533
sp|P68871|HBB_HUMAN	14	8	84.4	186.61
sp|Q15155|NOMO1_HUMAN	8	8	7.9	52.001
sp|P69892|HBG2_HUMAN	4	3	32.7	18.575
sp|P69905|HBA_HUMAN	9	5	74.6	82.223
sp|P78330|SERB_HUMAN	6	6	28.4	44.752
sp|P78371|TCPB_HUMAN	2	2	5.4	14.891
sp|P78406|RAE1L_HUMAN	1	1	4.1	6.4343
sp|P78417|GSTO1_HUMAN	5	5	18.3	31.225
sp|P78527|PRKDC_HUMAN	4	4	1.4	25.895
sp|P80108|PHLD_HUMAN	18	18	28.1	207.74
sp|P80188|NGAL_HUMAN	3	3	18.2	29.762
sp|P80303|NUCB2_HUMAN	8	8	25.7	57.977
sp|P81605|DCD_HUMAN	7	7	47.3	49.367
sp|P83876|TXN4A_HUMAN	5	5	47.2	34.168
sp|P84085|ARF5_HUMAN	5	1	26.7	11.981
sp|P84095|RHOG_HUMAN	1	1	9.9	7.2659
sp|P86790|CCZ1B_HUMAN	2	2	4.8	10.977
sp|P98194|AT2C1_HUMAN	2	2	2.8	11.797
sp|P99999|CYC_HUMAN	6	6	55.2	37.677
sp|Q00169|PIPNA_HUMAN	6	6	27	40.186
sp|Q00325|MPCP_HUMAN	4	4	12.4	23.495
sp|Q00341|VIGLN_HUMAN	2	2	2.4	11.573
sp|Q00577|PURA_HUMAN	3	3	8.1	17.95
sp|Q00610|CLH1_HUMAN	22	22	17.3	165.55
sp|Q00796|DHSO_HUMAN	4	4	11.5	28.394
sp|Q01459|DIAC_HUMAN	12	12	37.9	129.35
sp|Q01469|FABP5_HUMAN	12	12	77.8	171.06
sp|Q01518|CAP1_HUMAN	4	4	9.9	23.478
sp|Q01581|HMCS1_HUMAN	2	2	5	15.932
sp|Q01813|PFKAP_HUMAN	1	1	2.2	7.5369
sp|Q01970|PLCB3_HUMAN	9	9	8.5	56.609
sp|Q02083|NAAA_HUMAN	4	4	11.7	28.81
sp|Q02218|ODO1_HUMAN	2	2	2.7	10.991
sp|Q02388|CO7A1_HUMAN	1	1	0.4	6.4804
sp|Q02413|DSG1_HUMAN	32	32	32.1	323.31
sp|Q02487|DSC2_HUMAN	8	8	11.3	68.429
sp|Q02818|NUCB1_HUMAN	4	4	11.1	26.961
sp|Q02978|M2OM_HUMAN	2	2	8	17.696
sp|Q03252|LMNB2_HUMAN	4	4	5.8	38.016
sp|Q03518|TAP1_HUMAN	3	3	7.8	20.779
sp|Q03519|TAP2_HUMAN	2	2	2.5	11.523
sp|Q04637|IF4G1_HUMAN	2	2	1.8	13.625
sp|Q04656|ATP7A_HUMAN	6	6	5.5	37.061
sp|Q04726|TLE3_HUMAN	2	2	3.5	12.665
sp|Q04760|LGUL_HUMAN	4	4	18.5	24.081
sp|Q04837|SSBP_HUMAN	1	1	12.2	7.4441
sp|Q04917|1433F_HUMAN	3	1	13.4	8.3734
sp|Q05655|KPCD_HUMAN	4	4	5.9	22.671
sp|Q06136|KDSR_HUMAN	4	4	17.2	23.335
sp|Q06203|PUR1_HUMAN	4	4	10.1	24.74
sp|Q06323|PSME1_HUMAN	2	2	6.8	11.612
sp|Q06330|SUH_HUMAN	2	2	6.4	13.66
sp|Q06828|FMOD_HUMAN	2	2	7.7	12.505
sp|Q06830|PRDX1_HUMAN	12	9	53.8	106.94
sp|Q07020|RL18_HUMAN	1	1	6.9	7.3013
sp|Q07021|C1QBP_HUMAN	1	1	3.9	6.4923
sp|Q07065|CKAP4_HUMAN	17	17	33.7	199.16
sp|Q07617|SPAG1_HUMAN	3	3	4.8	19.462
sp|Q07960|RHG01_HUMAN	2	2	7.3	13.264
sp|Q08188|TGM3_HUMAN	37	37	70	323.31
sp|Q08257|QOR_HUMAN	3	3	10.3	21.775
sp|Q08380|LG3BP_HUMAN	9	9	21.9	60.936
sp|Q08431|MFGM_HUMAN	1	1	4.7	7.4366
sp|Q08554|DSC1_HUMAN	29	29	35.2	323.31
sp|Q08945|SSRP1_HUMAN	4	4	5.9	23.326
sp|Q08AI8|MB214_HUMAN	2	2	4.5	10.859
sp|Q09666|AHNK_HUMAN	25	25	11.4	169.97
sp|Q0PNE2|ELP6_HUMAN	2	2	9.8	13.22
sp|Q10472|GALT1_HUMAN	6	6	12.2	43.716
sp|Q10567|AP1B1_HUMAN	9	5	8.7	69.835
sp|Q12792|TWF1_HUMAN	2	2	7.7	11.258
sp|Q12797|ASPH_HUMAN	3	3	7	18.991
sp|Q12860|CNTN1_HUMAN	3	3	4.2	55.761
sp|Q12907|LMAN2_HUMAN	7	7	26.4	103.24
sp|Q12923|PTN13_HUMAN	2	2	1.3	14.345
sp|Q12955|ANK3_HUMAN	2	2	0.5	11.226
sp|Q12965|MYO1E_HUMAN	4	4	3.8	24.931
sp|Q12981|SEC20_HUMAN	3	3	21.9	19.559
sp|Q13011|ECH1_HUMAN	3	3	12.2	19.896
sp|Q13126|MTAP_HUMAN	8	8	36.4	74.505
sp|Q13162|PRDX4_HUMAN	10	8	42.8	66.307
sp|Q13200|PSMD2_HUMAN	3	3	5	17.674
sp|Q13201|MMRN1_HUMAN	1	1	1.5	7.2106
sp|Q13228|SBP1_HUMAN	20	20	56.1	141.84
sp|Q13232|NDK3_HUMAN	2	2	17.2	13.095
sp|Q13347|EIF3I_HUMAN	3	3	16.9	19.488
sp|Q13421|MSLN_HUMAN	4	4	7.5	25.206
sp|Q13438|OS9_HUMAN	4	4	9.4	32.196
sp|Q13444|ADA15_HUMAN	2	2	3.2	13.307
sp|Q13510|ASAH1_HUMAN	16	16	43.8	175.6
sp|Q13555|KCC2G_HUMAN	5	5	10.2	35.488
sp|Q13557|KCC2D_HUMAN	5	5	11.4	72.512
sp|Q13561|DCTN2_HUMAN	3	3	9.7	20.825
sp|Q13586|STIM1_HUMAN	2	2	3.4	11.411
sp|Q13596|SNX1_HUMAN	7	6	17	60.065
sp|Q13618|CUL3_HUMAN	2	2	3.3	14.119
sp|Q13630|FCL_HUMAN	2	2	4.4	11.732
sp|Q13724|MOGS_HUMAN	7	7	10.6	55.282
sp|Q13753|LAMC2_HUMAN	2	2	2.7	11.757
sp|Q13813|SPTN1_HUMAN	12	12	5.7	75.477
sp|Q13835|PKP1_HUMAN	14	14	23.8	121.86
sp|Q13838|DX39B_HUMAN	2	2	7.7	14.519
sp|Q13867|BLMH_HUMAN	33	33	57.6	323.31
sp|Q13882|PTK6_HUMAN	6	6	17.3	38.361
sp|Q13885|TBB2A_HUMAN	7	2	21.1	69.481
sp|Q14108|SCRB2_HUMAN	5	5	15.9	33.333
sp|Q14116|IL18_HUMAN	1	1	4.1	6.7066
sp|Q14118|DAG1_HUMAN	4	4	7	27.498
sp|Q14134|TRI29_HUMAN	7	7	13.6	53.851
sp|Q14145|KEAP1_HUMAN	2	2	3.8	10.628
sp|Q14152|EIF3A_HUMAN	2	2	1.4	12.404
sp|Q14165|MLEC_HUMAN	3	3	12.7	20.738
sp|Q14166|TTL12_HUMAN	1	1	2.3	8.815
sp|Q14204|DYHC1_HUMAN	29	29	8.2	175.41
sp|Q14210|LY6D_HUMAN	1	1	7.8	6.4371
sp|Q14247|SRC8_HUMAN	4	4	8.5	23.408
sp|Q14258|TRI25_HUMAN	3	3	4.9	17.814
sp|Q14315|FLNC_HUMAN	5	4	2.9	26.049
sp|Q14344|GNA13_HUMAN	3	3	11.4	18.869
sp|Q14573|ITPR3_HUMAN	3	3	1.5	23.535
sp|Q14574|DSC3_HUMAN	26	26	33.9	323.31
sp|Q14624|ITIH4_HUMAN	3	3	3.1	16.641
sp|Q14689|DIP2A_HUMAN	5	5	3.4	30.503
sp|Q14697|GANAB_HUMAN	7	7	8.4	49.964
sp|Q14764|MVP_HUMAN	17	17	23.7	138.49
sp|Q14956|GPNMB_HUMAN	2	2	4.7	11.772
sp|Q14974|IMB1_HUMAN	6	6	7.9	36.26
sp|Q15005|SPCS2_HUMAN	6	6	27.9	38.237
sp|Q15006|EMC2_HUMAN	1	1	4.4	7.0769
sp|Q15008|PSMD6_HUMAN	1	1	3.9	6.4343
sp|Q15018|ABRX2_HUMAN	3	3	9.2	21.775
sp|Q15019|SEPT2_HUMAN	2	2	7.5	12.735
sp|Q15042|RB3GP_HUMAN	2	2	2	12.413
sp|Q15067|ACOX1_HUMAN	7	7	10.3	49.509
sp|Q15075|EEA1_HUMAN	9	9	8.1	63.858
sp|Q15084|PDIA6_HUMAN	2	2	8.6	12.497
sp|Q15121|PEA15_HUMAN	1	1	14.6	6.4981
sp|Q15125|EBP_HUMAN	1	1	5.2	7.3645
sp|Q15126|PMVK_HUMAN	4	4	23.4	24.575
sp|Q15149|PLEC_HUMAN	54	49	14.2	323.31
sp|Q15165|PON2_HUMAN	6	6	21.2	67.633
sp|Q15166|PON3_HUMAN	4	4	15	26.401
sp|Q15181|IPYR_HUMAN	6	6	27	37.308
sp|Q15208|STK38_HUMAN	3	3	8.8	21.007
sp|Q15257|PTPA_HUMAN	2	2	4.7	12.383
sp|Q15291|RBBP5_HUMAN	3	3	5.9	17.34
sp|Q15363|TMED2_HUMAN	5	5	29.9	43.738
sp|Q15365|PCBP1_HUMAN	3	3	14.6	17.616
sp|Q15369|ELOC_HUMAN	2	2	19.6	11.91
sp|Q15382|RHEB_HUMAN	1	1	8.7	6.6347
sp|Q15392|DHC24_HUMAN	3	3	5.8	19.464
sp|Q15435|PP1R7_HUMAN	3	3	11.4	19.95
sp|Q15437|SC23B_HUMAN	2	2	3.4	13.055
sp|Q15459|SF3A1_HUMAN	3	3	5.2	18.9
sp|Q15517|CDSN_HUMAN	17	17	69	323.31
sp|Q15555|MARE2_HUMAN	1	1	6.1	8.5669
sp|Q15629|TRAM1_HUMAN	1	1	3.7	9.0112
sp|Q15631|TSN_HUMAN	2	2	9.6	12.386
sp|Q15751|HERC1_HUMAN	7	7	1.7	47.964
sp|Q15773|MLF2_HUMAN	2	2	13.7	27.964
sp|Q15800|MSMO1_HUMAN	1	1	4.8	9.2241
sp|Q15828|CYTM_HUMAN	7	7	46.3	323.31
sp|Q15833|STXB2_HUMAN	5	5	9.3	34.614
sp|Q15904|VAS1_HUMAN	4	4	7.9	29.464
sp|Q16270|IBP7_HUMAN	1	1	5.7	6.4936
sp|Q16401|PSMD5_HUMAN	2	2	4.8	13.578
sp|Q16531|DDB1_HUMAN	23	23	23.9	209.54
sp|Q16539|MK14_HUMAN	2	2	6.4	11.757
sp|Q16555|DPYL2_HUMAN	4	4	13.5	27.916
sp|Q16563|SYPL1_HUMAN	2	2	10	21.991
sp|Q16610|ECM1_HUMAN	19	19	40.4	300.44
sp|Q16611|BAK_HUMAN	2	2	17.1	10.892
sp|Q16651|PRSS8_HUMAN	2	2	10.5	25.825
sp|Q16658|FSCN1_HUMAN	4	4	9.7	25.374
sp|Q16698|DECR_HUMAN	5	5	17.3	57.785
sp|Q16706|MA2A1_HUMAN	17	17	18.9	129.51
sp|Q16739|CEGT_HUMAN	2	2	7.1	11.968
sp|Q16740|CLPP_HUMAN	2	2	10.8	18.741
sp|Q16769|QPCT_HUMAN	6	6	19.4	60.371
sp|Q16799|RTN1_HUMAN	2	2	2.4	11.33
sp|Q16851|UGPA_HUMAN	2	2	5.1	12.999
sp|Q16864|VATF_HUMAN	1	1	16	7.0239
sp|Q2TAA2|IAH1_HUMAN	2	2	8.1	11.488
sp|Q2TAY7|SMU1_HUMAN	5	5	17.9	40.51
sp|Q3MJ16|PA24E_HUMAN	4	4	4.8	23.486
sp|Q3SY77|UD3A2_HUMAN	4	4	9.8	25.266
sp|Q3ZCW2|LEGL_HUMAN	6	6	47.7	43.3
sp|Q4G0F5|VP26B_HUMAN	2	2	9.5	11.606
sp|Q52LG2|KR132_HUMAN	5	5	33.1	29.374
sp|Q52LW3|RHG29_HUMAN	3	3	2.5	19.754
sp|Q53FA7|QORX_HUMAN	3	3	10.2	16.895
sp|Q9P0S3|ORML1_HUMAN	1	1	9.8	8.7486
sp|Q53GQ0|DHB12_HUMAN	2	2	13.1	12.73
sp|Q53H96|P5CR3_HUMAN	6	6	29.9	52.399
sp|Q53RT3|APRV1_HUMAN	6	6	23.9	39.564
sp|Q9H0N0|RAB6C_HUMAN	1	1	8.7	8.3241
sp|Q56A73|SPIN4_HUMAN	1	1	3.2	6.6871
sp|Q5BJH7|YIF1B_HUMAN	1	1	4.1	6.7165
sp|Q5H8A4|PIGG_HUMAN	1	1	1.4	7.1727
sp|Q5JRA6|TGO1_HUMAN	2	2	1.2	12.908
sp|Q5JS37|NHLC3_HUMAN	3	3	12.1	32.697
sp|Q5MNZ6|WIPI3_HUMAN	4	4	12.2	29.031
sp|Q5T013|HYI_HUMAN	7	7	27.8	62.056
sp|Q5T1M5|FKB15_HUMAN	3	3	3.9	19.461
sp|Q5T5C0|STXB5_HUMAN	4	4	5	34.935
sp|Q5T749|KPRP_HUMAN	20	20	47.8	212.96
sp|Q5T750|XP32_HUMAN	7	7	31.2	67.295
sp|Q5T8D3|ACBD5_HUMAN	3	3	6.4	21.631
sp|Q5T9S5|CCD18_HUMAN	1	1	0.6	6.9543
sp|Q5TZA2|CROCC_HUMAN	2	2	1.2	13.196
sp|Q5UCC4|EMC10_HUMAN	2	2	10.3	16.257
sp|Q5VT79|AXA81_HUMAN	5	5	19.9	32.002
sp|Q5VTQ0|TT39B_HUMAN	2	2	3.2	11.662
sp|Q5VVQ6|OTU1_HUMAN	4	4	18.7	27.394
sp|Q5VXI9|LIPN_HUMAN	2	2	10.1	16.471
sp|Q5VXJ0|LIPK_HUMAN	1	1	4.8	6.6358
sp|Q5XG92|EST4A_HUMAN	5	5	9.8	31.765
sp|Q641Q3|METRL_HUMAN	3	3	11.6	20.846
sp|Q66K14|TBC9B_HUMAN	1	1	1.3	7.1339
sp|Q68D85|NR3L1_HUMAN	1	1	4	6.4844
sp|Q68D91|MBLC2_HUMAN	4	4	20.4	24.006
sp|Q69YZ2|T200B_HUMAN	1	1	3.3	6.4035
sp|Q6BCY4|NB5R2_HUMAN	3	3	10.5	18.63
sp|Q6DD88|ATLA3_HUMAN	3	3	9.2	19.768
sp|Q6GTS8|P20D1_HUMAN	1	1	3.8	7.4225
sp|Q6IA69|NADE_HUMAN	5	5	8.5	35.516
sp|Q6IBS0|TWF2_HUMAN	2	2	9.5	14.901
sp|Q6MZM0|HPHL1_HUMAN	2	2	1.6	11.517
sp|Q6N075|MFSD5_HUMAN	2	2	6.4	14.927
sp|Q6NUJ1|SAPL1_HUMAN	13	13	33.4	264.04
sp|Q6NXG1|ESRP1_HUMAN	2	2	4.7	12.639
sp|Q6P093|ADCL2_HUMAN	2	2	4	12.059
sp|Q6P1A2|MBOA5_HUMAN	2	2	3.9	12.82
sp|Q6P1J6|PLB1_HUMAN	8	8	7	80.337
sp|Q6P1M0|S27A4_HUMAN	3	3	6.1	21.02
sp|Q6P1M3|L2GL2_HUMAN	4	4	4.9	23.468
sp|Q6P1N9|TATD1_HUMAN	10	10	30.6	77.266
sp|Q96GK7|FAH2A_HUMAN	1	1	5.4	7.0327
sp|Q6P4A8|PLBL1_HUMAN	9	9	22.1	70.129
sp|Q6P4E1|CASC4_HUMAN	1	1	3.9	8.2108
sp|Q6P4Q7|CNNM4_HUMAN	2	2	4.3	11.992
sp|Q6P587|FAHD1_HUMAN	5	5	33.5	44.78
sp|Q6P597|KLC3_HUMAN	1	1	1.8	6.4673
sp|Q6PGP7|TTC37_HUMAN	1	1	1	8.1274
sp|Q6UVW9|CLC2A_HUMAN	3	3	18.4	18.671
sp|Q6UW68|TM205_HUMAN	2	2	13.2	15.418
sp|Q6UWE0|LRSM1_HUMAN	2	2	3.3	13.128
sp|Q6UWN5|LYPD5_HUMAN	4	4	33.5	48.699
sp|Q6UWP2|DHR11_HUMAN	7	7	35.4	54.328
sp|Q6UWP8|SBSN_HUMAN	29	29	68.5	323.31
sp|Q6UWQ7|IGFL2_HUMAN	1	1	13.4	7.7787
sp|Q6UWU2|GLB1L_HUMAN	2	1	3.8	6.7083
sp|Q6UWV2|MPZL3_HUMAN	1	1	5.5	6.6392
sp|Q6UX71|PXDC2_HUMAN	2	2	3.8	11.219
sp|Q6UXB1|IGFL3_HUMAN	2	2	22.4	14.226
sp|Q6XPR3|RPTN_HUMAN	4	4	9.4	94.394
sp|Q6XQN6|PNCB_HUMAN	5	5	9.5	39.771
sp|Q6YHK3|CD109_HUMAN	9	9	8.5	66.458
sp|Q6ZNA5|FRRS1_HUMAN	4	4	9.3	31.321
sp|Q6ZNF0|ACP7_HUMAN	8	8	28.3	62.183
sp|Q6ZNJ1|NBEL2_HUMAN	2	2	1.1	12.437
sp|Q6ZRP7|QSOX2_HUMAN	1	1	2.1	6.5796
sp|Q6ZRV2|FA83H_HUMAN	8	8	10.4	80.332
sp|Q6ZT21|TMPPE_HUMAN	2	2	6	16.553
sp|Q6ZVX7|FBX50_HUMAN	8	8	28.4	225.42
sp|Q6ZWK6|TM11F_HUMAN	2	2	6.8	11.609
sp|Q6ZWT7|MBOA2_HUMAN	4	4	7.3	34.213
sp|Q6ZXV5|TMTC3_HUMAN	5	5	7.8	37.21
sp|Q719H9|KCTD1_HUMAN	3	3	13.2	18.503
sp|Q75T13|PGAP1_HUMAN	2	2	2.1	10.835
sp|Q7KZF4|SND1_HUMAN	2	2	2.9	10.977
sp|Q7L523|RRAGA_HUMAN	4	4	16	30.246
sp|Q7L576|CYFP1_HUMAN	7	7	5.9	41.722
sp|Q7L5L3|GDPD3_HUMAN	10	10	32.1	117.43
sp|Q7L5N1|CSN6_HUMAN	1	1	5.5	7.559
sp|Q7Z2K6|ERMP1_HUMAN	10	10	11.5	83.123
sp|Q7Z406|MYH14_HUMAN	19	17	11.9	134.25
sp|Q7Z4W1|DCXR_HUMAN	7	7	31.1	52.918
sp|Q7Z5M8|AB12B_HUMAN	1	1	4.1	6.5361
sp|Q7Z7H5|TMED4_HUMAN	4	3	16.3	27.62
sp|Q86SG5|S1A7A_HUMAN	5	1	45.5	6.5964
sp|Q86SJ6|DSG4_HUMAN	3	3	3.8	17.981
sp|Q86SQ4|AGRG6_HUMAN	2	2	2.5	16.47
sp|Q86TM6|SYVN1_HUMAN	1	1	1.5	8.2789
sp|Q86UK0|ABCAC_HUMAN	8	8	3.3	51.712
sp|Q86VP6|CAND1_HUMAN	5	5	5.2	39.906
sp|Q86VR2|RETR3_HUMAN	1	1	3.9	7.3882
sp|Q86VR7|VS10L_HUMAN	3	3	5.3	24.855
sp|Q86W26|NAL10_HUMAN	5	5	11.6	33.116
sp|Q86WC4|OSTM1_HUMAN	2	2	5.4	14.243
sp|Q86X29|LSR_HUMAN	2	2	4.5	20.985
sp|Q86X76|NIT1_HUMAN	6	6	22.6	41.872
sp|Q86X83|COMD2_HUMAN	2	2	7.5	11.037
sp|Q86XP0|PA24D_HUMAN	3	3	5.5	20.404
sp|Q86Y82|STX12_HUMAN	6	6	29	56.826
sp|Q86YT6|MIB1_HUMAN	1	1	2.5	6.6051
sp|Q86Z20|CC125_HUMAN	1	1	4.3	7.0443
sp|Q8IU89|CERS3_HUMAN	2	2	6.8	13.057
sp|Q8IUC1|KR111_HUMAN	4	4	28.8	28.085
sp|Q8IUZ5|AT2L2_HUMAN	3	3	9.1	20.24
sp|Q8IV08|PLD3_HUMAN	10	10	25.7	68.958
sp|Q8IVB4|SL9A9_HUMAN	1	1	2.8	7.7721
sp|Q8IVF2|AHNK2_HUMAN	13	13	6.6	114.59
sp|Q8IVH8|M4K3_HUMAN	4	4	6.5	27.754
sp|Q8IW45|NNRD_HUMAN	8	8	29.4	75.638
sp|Q8IW75|SPA12_HUMAN	18	18	49.5	202.53
sp|Q8IW92|GLBL2_HUMAN	3	3	6	19.603
sp|Q8IWA5|CTL2_HUMAN	1	1	1.1	6.4353
sp|Q8IXM6|NRM_HUMAN	4	4	19.5	25.715
sp|Q8IY95|TM192_HUMAN	1	1	5.5	7.3708
sp|Q8IYJ3|SYTL1_HUMAN	3	3	8	18.863
sp|Q8IYS0|ASTRC_HUMAN	3	3	4.7	21.435
sp|Q8IYS1|P20D2_HUMAN	2	2	4.8	12.243
sp|Q8IYS2|K2013_HUMAN	3	3	4.6	18.341
sp|Q8IZ83|A16A1_HUMAN	12	12	19.3	116.35
sp|Q8IZP0|ABI1_HUMAN	2	2	5.3	16.933
sp|Q8N0U8|VKORL_HUMAN	2	2	11.4	12.606
sp|Q8N138|ORML3_HUMAN	1	1	9.8	8.5636
sp|Q8N1F8|S11IP_HUMAN	4	4	4	25.73
sp|Q8N1Q8|ACO15_HUMAN	3	3	10.1	19.473
sp|Q8N357|S35F6_HUMAN	1	1	3.8	7.156
sp|Q8N3F8|MILK1_HUMAN	2	2	3.5	13.053
sp|Q8N3Y7|RDHE2_HUMAN	5	5	16.2	29.625
sp|Q8N573|OXR1_HUMAN	1	1	1.8	6.6008
sp|Q8N5K1|CISD2_HUMAN	2	2	20.7	13.916
sp|Q8N5M1|ATPF2_HUMAN	1	1	5.5	7.1227
sp|Q8N5M9|JAGN1_HUMAN	1	1	6.6	10.876
sp|Q8N697|S15A4_HUMAN	2	2	3.6	11.818
sp|Q8N6M3|FITM2_HUMAN	1	1	5	6.753
sp|Q8N766|EMC1_HUMAN	11	11	15.8	78.35
sp|Q8N8N7|PTGR2_HUMAN	2	2	6	11.22
sp|Q8N8S7|ENAH_HUMAN	1	1	1.7	6.4235
sp|Q8NBJ4|GOLM1_HUMAN	3	3	7.7	19.13
sp|Q8NBJ9|SIDT2_HUMAN	4	4	4.4	24.2
sp|Q8NBK3|SUMF1_HUMAN	1	1	4	8.3204
sp|Q8NBM4|UBAC2_HUMAN	2	2	5.5	12.853
sp|Q8NBZ7|UXS1_HUMAN	4	4	17.6	27.252
sp|Q8NCC3|PAG15_HUMAN	3	3	10.4	18.675
sp|Q8NCJ5|SPRY3_HUMAN	3	3	16.5	18.249
sp|Q8NCW5|NNRE_HUMAN	8	8	36.8	59.384
sp|Q8NDA8|MROH1_HUMAN	2	2	1.5	11.76
sp|Q8NDZ4|DIK2A_HUMAN	5	5	14	35.814
sp|Q8NEU8|DP13B_HUMAN	2	2	4.8	14.699
sp|Q8NEW0|ZNT7_HUMAN	3	3	9.3	20.886
sp|Q8NEX9|DR9C7_HUMAN	12	12	39	93.951
sp|Q8NFQ6|BPIFC_HUMAN	7	7	15.8	45.087
sp|Q8NFQ8|TOIP2_HUMAN	2	2	5.5	11.735
sp|Q8NFT8|DNER_HUMAN	1	1	2	7.9561
sp|Q8NFW8|NEUA_HUMAN	3	3	7.4	16.494
sp|Q8NHP8|PLBL2_HUMAN	8	8	16.6	64.649
sp|Q8NI29|FBX27_HUMAN	3	3	15.9	36.507
sp|Q8TB96|TIP_HUMAN	4	4	6.5	24.475
sp|Q8TBB1|LNX1_HUMAN	1	1	2.2	7.7787
sp|Q8TBC4|UBA3_HUMAN	1	1	2.2	6.8427
sp|Q8TBX8|PI42C_HUMAN	1	1	3.3	7.1691
sp|Q8TCJ2|STT3B_HUMAN	2	2	2.8	24.531
sp|Q8TCT8|SPP2A_HUMAN	1	1	2.7	7.0328
sp|Q8TCT9|HM13_HUMAN	4	4	11.7	28.685
sp|Q8TCV5|WFDC5_HUMAN	1	1	4.9	6.8203
sp|Q8TDL5|BPIB1_HUMAN	5	5	12.8	52.53
sp|Q8TDN7|ACER1_HUMAN	1	1	4.9	6.8993
sp|Q8TDQ7|GNPI2_HUMAN	9	5	52.2	131.38
sp|Q8TDY2|RBCC1_HUMAN	3	3	1.6	18.545
sp|Q8TE02|ELP5_HUMAN	2	2	7	13.176
sp|Q8TE68|ES8L1_HUMAN	11	11	16.3	73.128
sp|Q8TEA8|DTD1_HUMAN	2	2	12.4	16.778
sp|Q8TEM1|PO210_HUMAN	2	2	1.5	14.017
sp|Q8WTW4|NPRL2_HUMAN	1	1	3.4	6.6825
sp|Q8WUM4|PDC6I_HUMAN	22	22	27.9	154.97
sp|Q8WUW1|BRK1_HUMAN	2	2	32	13.724
sp|Q8WVF5|KCTD4_HUMAN	5	5	25.1	30.341
sp|Q8WVQ1|CANT1_HUMAN	1	1	4.7	7.7608
sp|Q8WVV4|POF1B_HUMAN	19	19	36.5	195.58
sp|Q8WW22|DNJA4_HUMAN	1	1	3.3	7.1559
sp|Q8WWA1|TMM40_HUMAN	1	1	4.7	7.9413
sp|Q8WWY7|WFD12_HUMAN	1	1	8.1	11.604
sp|Q8WXF7|ATLA1_HUMAN	1	1	3.4	7.2754
sp|Q8WXI4|ACO11_HUMAN	2	2	2.6	11.244
sp|Q8WY22|BRI3B_HUMAN	1	1	7.6	7.9093
sp|Q8WZA2|RPGF4_HUMAN	4	4	4.5	24.462
sp|Q92484|ASM3A_HUMAN	7	7	15.5	56.042
sp|Q92506|DHB8_HUMAN	3	3	15.7	22.103
sp|Q92520|FAM3C_HUMAN	6	6	34.4	57.368
sp|Q92542|NICA_HUMAN	8	8	13.8	173.75
sp|Q92544|TM9S4_HUMAN	8	8	14.8	59.509
sp|Q92546|RGP1_HUMAN	2	2	7.2	11.941
sp|Q92572|AP3S1_HUMAN	1	1	7.8	7.0198
sp|Q92585|MAML1_HUMAN	1	1	0.8	6.5103
sp|Q92599|SEPT8_HUMAN	3	3	8.1	24.011
sp|Q92614|MY18A_HUMAN	2	2	0.9	11.185
sp|Q92616|GCN1_HUMAN	3	3	1.2	17.638
sp|Q92696|PGTA_HUMAN	2	2	5.3	11.601
sp|Q92734|TFG_HUMAN	4	4	19.2	28.598
sp|Q92747|ARC1A_HUMAN	4	4	13	23.15
sp|Q92783|STAM1_HUMAN	2	2	5.7	12.132
sp|Q92817|EVPL_HUMAN	19	19	12.7	135.07
sp|Q92820|GGH_HUMAN	11	11	41.8	113.23
sp|Q92824|PCSK5_HUMAN	4	4	1.9	23.764
sp|Q92874|DNSL2_HUMAN	5	5	22.7	38.533
sp|Q92876|KLK6_HUMAN	3	3	17.6	21.947
sp|Q92890|UFD1_HUMAN	4	4	16	33.382
sp|Q92896|GSLG1_HUMAN	6	6	5.5	36.927
sp|Q92900|RENT1_HUMAN	10	10	12.3	75.697
sp|Q92903|CDS1_HUMAN	2	2	3.7	11.138
sp|Q93009|UBP7_HUMAN	14	14	16.9	124.77
sp|Q93050|VPP1_HUMAN	11	9	12.9	72.075
sp|Q969E2|SCAM4_HUMAN	1	1	4.8	8.2987
sp|Q969H8|MYDGF_HUMAN	3	3	22	20.323
sp|Q969T9|WBP2_HUMAN	2	2	7.7	12.245
sp|Q969V3|NCLN_HUMAN	10	10	25.8	65.231
sp|Q969X5|ERGI1_HUMAN	1	1	3.4	6.7439
sp|Q96AG4|LRC59_HUMAN	1	1	3.3	7.0687
sp|Q96AQ6|PBIP1_HUMAN	1	1	1.5	6.7799
sp|Q96AQ8|MCUR1_HUMAN	2	2	4.7	12.648
sp|Q96AT9|RPE_HUMAN	2	2	10.5	13.457
sp|Q96C23|GALM_HUMAN	3	3	12	17.892
sp|Q96CD2|COAC_HUMAN	6	6	38.7	40.667
sp|Q96CW1|AP2M1_HUMAN	1	1	3.9	7.1422
sp|Q96CX2|KCD12_HUMAN	2	2	6.8	12.366
sp|Q96DA0|ZG16B_HUMAN	1	1	10.1	44.22
sp|Q96DE0|NUD16_HUMAN	7	7	32.3	48.492
sp|Q96DR5|BPIA2_HUMAN	2	2	8.8	13.465
sp|Q96DR8|MUCL1_HUMAN	2	2	18.9	16.186
sp|Q96DZ1|ERLEC_HUMAN	5	5	13	42.912
sp|Q96EE3|SEH1_HUMAN	6	6	30.8	55.856
sp|Q96EK6|GNA1_HUMAN	4	4	39.7	25.94
sp|Q96EP0|RNF31_HUMAN	2	2	3.2	10.992
sp|Q96FN4|CPNE2_HUMAN	3	2	6.9	13.076
sp|Q96FN9|DTD2_HUMAN	5	5	44	44.411
sp|Q96FQ6|S10AG_HUMAN	4	4	38.8	39.943
sp|Q96FV2|SCRN2_HUMAN	2	2	7.1	10.887
sp|Q96FW1|OTUB1_HUMAN	4	4	18.1	34.482
sp|Q96G03|PGM2_HUMAN	12	12	21.7	111.38
sp|Q96GC9|VMP1_HUMAN	1	1	2.5	6.898
sp|Q96GX9|MTNB_HUMAN	4	4	20.2	32.675
sp|Q96HC4|PDLI5_HUMAN	1	1	2	8.1557
sp|Q96HH9|GRM2B_HUMAN	1	1	6.7	8.4152
sp|Q96HR9|REEP6_HUMAN	1	1	6.2	6.9886
sp|Q96HS1|PGAM5_HUMAN	1	1	5.9	6.43
sp|Q96I99|SUCB2_HUMAN	2	2	5.6	11.635
sp|Q96IU4|ABHEB_HUMAN	6	6	39.5	43.232
sp|Q96IV0|NGLY1_HUMAN	3	3	6.9	28.128
sp|Q96IX5|USMG5_HUMAN	1	1	25.9	8.3354
sp|Q96J02|ITCH_HUMAN	3	3	3.9	15.825
sp|Q96JC1|VPS39_HUMAN	2	2	3	12.259
sp|Q96JC9|EAF1_HUMAN	2	2	9.3	15.133
sp|Q96JI7|SPTCS_HUMAN	1	1	0.6	8.0303
sp|Q96JJ7|TMX3_HUMAN	1	1	3.1	7.7577
sp|Q96JN8|NEUL4_HUMAN	2	2	1.8	14.452
sp|Q96JY6|PDLI2_HUMAN	2	2	7.7	12.541
sp|Q96K17|BT3L4_HUMAN	4	4	18.4	82.78
sp|Q96K37|S35E1_HUMAN	1	1	5.9	7.6951
sp|Q96KC8|DNJC1_HUMAN	2	2	4.9	12.755
sp|Q96KP4|CNDP2_HUMAN	3	3	11.4	21.94
sp|Q96L46|CPNS2_HUMAN	10	10	44.8	148.26
sp|Q96L92|SNX27_HUMAN	1	1	2.6	6.4447
sp|Q96LB8|PGRP4_HUMAN	2	2	5.6	11.976
sp|Q96M27|PRRC1_HUMAN	4	4	11.7	45.98
sp|Q96N66|MBOA7_HUMAN	1	1	3.4	6.8631
sp|Q96NR8|RDH12_HUMAN	2	2	5.4	11.306
sp|Q96NY8|NECT4_HUMAN	2	2	4.7	12.611
sp|Q96P63|SPB12_HUMAN	26	26	73.3	323.31
sp|Q96PE7|MCEE_HUMAN	1	1	7.4	6.7277
sp|Q96QA5|GSDMA_HUMAN	23	23	55.5	323.31
sp|Q96QK1|VPS35_HUMAN	7	7	9.2	50.029
sp|Q96QR8|PURB_HUMAN	3	3	8	23.832
sp|Q96RQ1|ERGI2_HUMAN	2	2	6.9	13.73
sp|Q96S16|JMJD8_HUMAN	3	3	11.4	17.935
sp|Q96S52|PIGS_HUMAN	2	2	5.4	12.779
sp|Q96S55|WRIP1_HUMAN	2	2	3.8	12.617
sp|Q96SI1|KCD15_HUMAN	2	2	6	13.968
sp|Q96SL1|DIRC2_HUMAN	1	1	3.3	7.1115
sp|Q96TA1|NIBL1_HUMAN	7	7	10.3	46.322
sp|Q99436|PSB7_HUMAN	3	3	11.6	20.179
sp|Q99460|PSMD1_HUMAN	1	1	2.2	7.0454
sp|Q99497|PARK7_HUMAN	12	12	48.1	185.56
sp|Q99519|NEUR1_HUMAN	3	3	9.4	19.915
sp|Q99523|SORT_HUMAN	2	2	2.9	12.52
sp|Q99536|VAT1_HUMAN	12	12	47.6	115.61
sp|Q99584|S10AD_HUMAN	1	1	12.2	6.481
sp|Q99611|SPS2_HUMAN	2	2	4.9	11.16
sp|Q99653|CHP1_HUMAN	7	7	39.5	66.678
sp|Q99714|HCD2_HUMAN	2	2	14.6	13.046
sp|Q99720|SGMR1_HUMAN	1	1	5.8	7.0166
sp|Q99735|MGST2_HUMAN	1	1	9.5	12.231
sp|Q99747|SNAG_HUMAN	4	4	18.3	25.696
sp|Q99798|ACON_HUMAN	2	2	4.2	10.921
sp|Q99805|TM9S2_HUMAN	5	5	10.9	36.755
sp|Q99816|TS101_HUMAN	3	3	9.5	19.219
sp|Q99829|CPNE1_HUMAN	6	6	11	44.145
sp|Q99832|TCPH_HUMAN	3	3	6.1	17.984
sp|Q99961|SH3G1_HUMAN	2	2	7.1	11.49
sp|Q9BQ50|TREX2_HUMAN	7	7	24.4	61.735
sp|Q9BQA1|MEP50_HUMAN	5	5	23.4	95.674
sp|Q9BQE3|TBA1C_HUMAN	14	1	38.3	13.488
sp|Q9BQS8|FYCO1_HUMAN	12	12	13.7	81.89
sp|Q9BRF8|CPPED_HUMAN	5	5	17.8	42.633
sp|Q9BRK5|CAB45_HUMAN	2	2	5.2	12.437
sp|Q9BS26|ERP44_HUMAN	5	5	15.3	32.935
sp|Q9BS40|LXN_HUMAN	3	3	17.6	40.31
sp|Q9BSA9|TM175_HUMAN	2	2	5.6	11.8
sp|Q9BSB4|ATGA1_HUMAN	4	4	25.2	29.176
sp|Q9BSJ8|ESYT1_HUMAN	2	2	2.1	14.856
sp|Q9BT40|INP5K_HUMAN	1	1	3.3	6.9757
sp|Q9BTU6|P4K2A_HUMAN	2	2	5	10.95
sp|Q9BTV4|TMM43_HUMAN	13	13	39	202.85
sp|Q9BTY2|FUCO2_HUMAN	2	2	4.7	12.746
sp|Q9BUF5|TBB6_HUMAN	5	2	16.4	15.015
sp|Q9BUH6|PAXX_HUMAN	1	1	5.9	13.345
sp|Q9BUP3|HTAI2_HUMAN	4	4	23.1	25.813
sp|Q9BVC6|TM109_HUMAN	2	2	9.1	17.125
sp|Q9BVK6|TMED9_HUMAN	6	5	25.5	61.55
sp|Q9BW30|TPPP3_HUMAN	2	2	15.9	14.981
sp|Q9BWD1|THIC_HUMAN	11	11	42.3	135.95
sp|Q9BWS9|CHID1_HUMAN	1	1	3.1	6.7147
sp|Q9BXP2|S12A9_HUMAN	2	2	2.5	11.404
sp|Q9BXW6|OSBL1_HUMAN	2	2	2.8	11.373
sp|Q9BY32|ITPA_HUMAN	1	1	8.2	6.9528
sp|Q9BYE2|TMPSD_HUMAN	4	4	7.2	24.244
sp|Q9BYJ0|FGFP2_HUMAN	2	2	9	13.659
sp|Q9BYJ1|LOXE3_HUMAN	15	15	28.7	104.13
sp|Q9BYQ9|KRA48_HUMAN	3	1	15.7	23.205
sp|Q9BYR6|KRA33_HUMAN	1	1	17.3	16.151
sp|Q9BYR7|KRA32_HUMAN	1	1	17.3	7.2364
sp|Q9BYT8|NEUL_HUMAN	2	2	2.8	10.858
sp|Q9BZW7|TSG10_HUMAN	1	1	2.1	7.1064
sp|Q9C040|TRIM2_HUMAN	6	6	10.6	65.74
sp|Q9C0E8|LNP_HUMAN	1	1	3	6.9587
sp|Q9GZM5|YIPF3_HUMAN	2	2	5.7	11.24
sp|Q9GZP4|PITH1_HUMAN	4	4	28	62.931
sp|Q9GZT8|NIF3L_HUMAN	7	7	26.8	49.176
sp|Q9GZZ8|LACRT_HUMAN	2	2	13	12.131
sp|Q9H008|LHPP_HUMAN	5	5	12.2	30.032
sp|Q9H0B8|CRLD2_HUMAN	5	5	12.1	32.694
sp|Q9H0E2|TOLIP_HUMAN	8	8	36.1	78.972
sp|Q9H0N5|PHS2_HUMAN	3	3	27.7	31.82
sp|Q9H0P0|5NT3A_HUMAN	5	5	13.4	30.045
sp|Q9H0R3|TM222_HUMAN	2	2	22.1	14.366
sp|Q9H0R4|HDHD2_HUMAN	4	4	29	29.363
sp|Q9H0U3|MAGT1_HUMAN	5	5	15.2	45.386
sp|Q9H0U4|RAB1B_HUMAN	7	3	53.2	22.289
sp|Q9H0V9|LMA2L_HUMAN	3	3	8.9	16.895
sp|Q9H0W9|CK054_HUMAN	6	6	24.8	48.612
sp|Q9H173|SIL1_HUMAN	2	2	4.3	11.75
sp|Q9H190|SDCB2_HUMAN	2	2	7.5	12.006
sp|Q9H1E1|RNAS7_HUMAN	5	5	45.5	63.781
sp|Q9H1E3|NUCKS_HUMAN	1	1	3.7	6.4891
sp|Q9H1E5|TMX4_HUMAN	2	2	7.4	12.274
sp|Q9H223|EHD4_HUMAN	9	7	20	70.132
sp|Q9H299|SH3L3_HUMAN	3	3	31.2	44.444
sp|Q9H2C0|GAN_HUMAN	7	7	13.4	43.169
sp|Q9H2U2|IPYR2_HUMAN	9	9	31.1	139.09
sp|Q9H330|TM245_HUMAN	2	2	2.5	18.542
sp|Q9H3G5|CPVL_HUMAN	5	5	10.9	35.968
sp|Q9H3K2|GHITM_HUMAN	2	2	6.4	11.929
sp|Q9H3N1|TMX1_HUMAN	2	2	4.6	11.01
sp|Q9H3S5|PIGM_HUMAN	1	1	3.3	6.653
sp|Q9H3U1|UN45A_HUMAN	4	4	5.1	22.986
sp|Q9H3Z4|DNJC5_HUMAN	1	1	7.1	11.305
sp|Q9H444|CHM4B_HUMAN	1	1	7.1	16.445
sp|Q9H4M9|EHD1_HUMAN	16	12	33.1	120.39
sp|Q9H6A0|DEN2D_HUMAN	1	1	3.6	7.1128
sp|Q9H6H4|REEP4_HUMAN	2	2	6.6	10.921
sp|Q9H6U8|ALG9_HUMAN	4	4	8.3	24.534
sp|Q9H6Y7|RN167_HUMAN	2	2	4.6	11.13
sp|Q9H720|PG2IP_HUMAN	7	7	10.4	48.181
sp|Q9H845|ACAD9_HUMAN	3	3	5.3	19.317
sp|Q9H8H3|MET7A_HUMAN	3	3	17.2	33.168
sp|Q9H9G7|AGO3_HUMAN	5	2	6	13.422
sp|Q9H9H4|VP37B_HUMAN	1	1	6	7.0527
sp|Q9HAB8|PPCS_HUMAN	2	2	6.1	12.895
sp|Q9HAN9|NMNA1_HUMAN	4	4	17.9	28.023
sp|Q9HAT2|SIAE_HUMAN	8	8	18.7	66.803
sp|Q9HAV0|GBB4_HUMAN	5	2	15.9	14.067
sp|Q9HB07|MYG1_HUMAN	4	4	12.8	28.798
sp|Q9HB40|RISC_HUMAN	9	9	23	82.541
sp|Q9HB90|RRAGC_HUMAN	3	3	9.5	18.964
sp|Q9HC07|TM165_HUMAN	2	2	9.3	11.769
sp|Q9HC35|EMAL4_HUMAN	3	3	1.7	16.724
sp|Q9HC38|GLOD4_HUMAN	2	2	7.7	13.412
sp|Q9HC84|MUC5B_HUMAN	7	7	1.7	44.657
sp|Q9HCC0|MCCB_HUMAN	4	4	7.6	24.371
sp|Q9HCE6|ARGAL_HUMAN	4	4	4.4	27.305
sp|Q9HCE9|ANO8_HUMAN	4	4	3.7	22.511
sp|Q9HCJ1|ANKH_HUMAN	3	3	6.3	17.54
sp|Q9HCY8|S10AE_HUMAN	7	7	77.9	81.225
sp|Q9HD45|TM9S3_HUMAN	6	6	8.5	38.895
sp|Q9HD67|MYO10_HUMAN	2	2	1.3	12.433
sp|Q9HDC9|APMAP_HUMAN	11	11	33.2	78.947
sp|Q9NNX1|TUFT1_HUMAN	3	3	7.9	26.528
sp|Q9NP55|BPIA1_HUMAN	4	4	23	41.708
sp|Q9NP58|ABCB6_HUMAN	5	5	7.1	33.675
sp|Q9NP72|RAB18_HUMAN	4	4	24.3	23.543
sp|Q9NP79|VTA1_HUMAN	3	3	12.4	46.138
sp|Q9NPA0|EMC7_HUMAN	4	4	25.6	31.967
sp|Q9NPJ8|NXT2_HUMAN	4	3	31.7	27.796
sp|Q9NQ38|ISK5_HUMAN	12	12	13.3	88.346
sp|Q9NQC3|RTN4_HUMAN	4	4	4	38.305
sp|Q9NQE9|HINT3_HUMAN	2	2	13.2	11.67
sp|Q9NQR4|NIT2_HUMAN	3	3	17	18.984
sp|Q9NQT8|KI13B_HUMAN	7	7	5.2	51.477
sp|Q9NQW7|XPP1_HUMAN	3	2	5.1	11.631
sp|Q9NQX3|GEPH_HUMAN	15	15	27.7	138.06
sp|Q9NR09|BIRC6_HUMAN	2	2	0.8	11.312
sp|Q9NR46|SHLB2_HUMAN	3	3	12.7	40.59
sp|Q9NR50|EI2BG_HUMAN	1	1	4	7.3797
sp|Q9NRD1|FBX6_HUMAN	2	2	7.8	21.099
sp|Q9NRD9|DUOX1_HUMAN	5	5	3.5	32.018
sp|Q9NRP0|OSTC_HUMAN	2	2	12.8	17.071
sp|Q9NS86|LANC2_HUMAN	2	2	2.9	11.027
sp|Q9NSB8|HOME2_HUMAN	2	2	7.3	13.052
sp|Q9NSY2|STAR5_HUMAN	2	2	8.5	11.903
sp|Q9NTJ4|MA2C1_HUMAN	13	13	16.6	107.33
sp|Q9NTK5|OLA1_HUMAN	2	2	7.1	10.561
sp|Q9NTM9|CUTC_HUMAN	3	3	16.5	21.722
sp|Q9NTQ9|CXB4_HUMAN	1	1	5.3	35.519
sp|Q9NUJ7|PLCX1_HUMAN	7	7	24.1	51.368
sp|Q9NUM4|T106B_HUMAN	2	2	9.5	19.291
sp|Q9NUQ7|UFSP2_HUMAN	2	2	7.5	12.815
sp|Q9NUU7|DD19A_HUMAN	3	3	11.3	36.95
sp|Q9NV96|CC50A_HUMAN	4	4	11.1	24.647
sp|Q9NVH6|TMLH_HUMAN	1	1	4	7.8274
sp|Q9NVJ2|ARL8B_HUMAN	3	2	17.2	20.708
sp|Q9NW15|ANO10_HUMAN	7	7	12.6	52.164
sp|Q9NWV8|BABA1_HUMAN	2	2	9.4	14.114
sp|Q9NX08|COMD8_HUMAN	2	2	16.9	11.73
sp|Q9NX46|ARHL2_HUMAN	1	1	4.4	7.1461
sp|Q9NXV2|KCTD5_HUMAN	3	3	19.7	21.194
sp|Q9NXW2|DJB12_HUMAN	1	1	2.7	8.6072
sp|Q9NY33|DPP3_HUMAN	8	8	18.3	91.061
sp|Q9NY59|NSMA2_HUMAN	2	2	3.2	12.107
sp|Q9NYL2|M3K20_HUMAN	1	1	1.4	6.5397
sp|Q9NYU2|UGGG1_HUMAN	7	7	5.3	43.3
sp|Q9NZ01|TECR_HUMAN	6	6	15.3	36.036
sp|Q9NZ43|USE1_HUMAN	2	2	8.1	12.134
sp|Q9NZC3|GDE1_HUMAN	3	3	12.1	20.396
sp|Q9NZD2|GLTP_HUMAN	2	2	12.9	13.85
sp|Q9NZH6|IL37_HUMAN	4	4	26.1	29.391
sp|Q9NZH8|IL36G_HUMAN	5	5	33.1	40.455
sp|Q9NZL9|MAT2B_HUMAN	2	2	6.6	12.496
sp|Q9NZT1|CALL5_HUMAN	11	11	71.2	323.31
sp|Q9NZZ3|CHMP5_HUMAN	1	1	9.6	7.4497
sp|Q9P003|CNIH4_HUMAN	1	1	14.4	7.8516
sp|Q9P0G3|KLK14_HUMAN	3	3	14.2	24.369
sp|Q9P0I2|EMC3_HUMAN	1	1	6.5	6.9723
sp|Q9P1Z2|CACO1_HUMAN	2	2	3.8	12.37
sp|Q9P253|VPS18_HUMAN	7	7	10.5	101.81
sp|Q9P258|RCC2_HUMAN	1	1	3.6	6.4167
sp|Q9P289|STK26_HUMAN	2	2	6.2	12.444
sp|Q9P2D6|F135A_HUMAN	2	2	1.5	12.864
sp|Q9P2J5|SYLC_HUMAN	2	2	2.2	12.486
sp|Q9P2T1|GMPR2_HUMAN	8	8	32.8	79.973
sp|Q9UBC9|SPRR3_HUMAN	2	2	18.3	11.351
sp|Q9UBG3|CRNN_HUMAN	4	4	12.5	30.299
sp|Q9UBH0|I36RA_HUMAN	2	2	20	12.573
sp|Q9UBI1|COMD3_HUMAN	3	3	23.6	17.897
sp|Q9UBI6|GBG12_HUMAN	2	2	37.5	13.08
sp|Q9UBM7|DHCR7_HUMAN	4	4	10.5	21.754
sp|Q9UBQ7|GRHPR_HUMAN	4	4	20.4	26.616
sp|Q9UBR2|CATZ_HUMAN	2	2	7.3	13.127
sp|Q9UBV2|SE1L1_HUMAN	7	7	11.8	44.405
sp|Q9UBV8|PEF1_HUMAN	2	2	7.4	10.991
sp|Q9UBX7|KLK11_HUMAN	3	3	10.3	19.619
sp|Q9UEU0|VTI1B_HUMAN	1	1	5.2	9.2901
sp|Q9UFN0|NPS3A_HUMAN	5	5	25.9	44.679
sp|Q9UGL9|CRCT1_HUMAN	1	1	29.3	6.8589
sp|Q9UGM3|DMBT1_HUMAN	4	4	11.6	34.357
sp|Q9UGP8|SEC63_HUMAN	2	2	3.7	10.607
sp|Q9UGT4|SUSD2_HUMAN	3	3	5.6	17.676
sp|Q9UH99|SUN2_HUMAN	8	8	20.8	62.131
sp|Q9UHA4|LTOR3_HUMAN	2	2	20.2	14.361
sp|Q9UHG3|PCYOX_HUMAN	11	11	28.7	91.555
sp|Q9UHL4|DPP2_HUMAN	7	7	17.7	58.997
sp|Q9UHW9|S12A6_HUMAN	2	2	1.6	11.856
sp|Q9UI42|CBPA4_HUMAN	9	9	34.7	67.919
sp|Q9UIQ6|LCAP_HUMAN	13	13	15.1	110.17
sp|Q9UIV8|SPB13_HUMAN	14	14	35.8	141.18
sp|Q9UJ70|NAGK_HUMAN	11	11	48.8	110.97
sp|Q9UJ71|CLC4K_HUMAN	5	5	16.2	42.344
sp|Q9UJ83|HACL1_HUMAN	1	1	2.2	7.2495
sp|Q9UJS0|CMC2_HUMAN	2	2	3	11.416
sp|Q9UJU6|DBNL_HUMAN	3	3	11.4	19.036
sp|Q9UJZ1|STML2_HUMAN	3	3	17.7	19.311
sp|Q9UKG1|DP13A_HUMAN	2	2	4.5	15.382
sp|Q9UKK6|NXT1_HUMAN	2	1	15.7	7.1992
sp|Q9UKK9|NUDT5_HUMAN	7	7	34.2	154.17
sp|Q9UKQ9|KLK9_HUMAN	5	5	19.6	31.423
sp|Q9UKR3|KLK13_HUMAN	2	2	10.1	10.953
sp|Q9UKU7|ACAD8_HUMAN	3	3	9.6	19.434
sp|Q9UKV8|AGO2_HUMAN	10	8	15.8	55.002
sp|Q9UL18|AGO1_HUMAN	14	10	22.1	89.424
sp|Q9UL25|RAB21_HUMAN	1	1	7.6	18.832
sp|Q9UL26|RB22A_HUMAN	2	2	16.5	12.716
sp|Q9ULA0|DNPEP_HUMAN	7	7	15.8	43.726
sp|Q9ULC3|RAB23_HUMAN	2	2	8	11.808
sp|Q9ULC6|PADI1_HUMAN	9	9	15.4	63.84
sp|Q9ULI1|NWD2_HUMAN	2	2	1.4	10.756
sp|Q9ULV0|MYO5B_HUMAN	3	3	2.4	18.102
sp|Q9ULZ3|ASC_HUMAN	2	2	12.8	10.899
sp|Q9UM00|TMCO1_HUMAN	2	2	12.2	11.951
sp|Q9UM22|EPDR1_HUMAN	4	4	20.1	32.257
sp|Q9UM54|MYO6_HUMAN	3	3	2.2	17.008
sp|Q9UN19|DAPP1_HUMAN	1	1	7.1	7.7254
sp|Q9UN36|NDRG2_HUMAN	2	2	8.6	14.667
sp|Q9UN81|LORF1_HUMAN	2	2	4.1	13.685
sp|Q9UNE7|CHIP_HUMAN	1	1	5	6.3933
sp|Q9UNF0|PACN2_HUMAN	3	3	6.8	28.195
sp|Q9UNK0|STX8_HUMAN	2	2	14	32.935
sp|Q9UNM6|PSD13_HUMAN	1	1	3.2	6.5533
sp|Q9UNZ2|NSF1C_HUMAN	3	3	9.2	18.995
sp|Q9UPN3|MACF1_HUMAN	6	6	1	38.67
sp|Q9UQ80|PA2G4_HUMAN	5	5	16.8	32.977
sp|Q9UQB8|BAIP2_HUMAN	7	7	15.8	48.253
sp|Q9Y230|RUVB2_HUMAN	6	6	17.7	34.529
sp|Q9Y232|CDYL_HUMAN	2	2	5.2	13.707
sp|Q9Y251|HPSE_HUMAN	4	4	9	32.6
sp|Q9Y256|FACE2_HUMAN	1	1	4.3	7.2235
sp|Q9Y262|EIF3L_HUMAN	2	2	5.3	15.68
sp|Q9Y277|VDAC3_HUMAN	3	3	14.1	19.66
sp|Q9Y282|ERGI3_HUMAN	3	3	8.6	18.765
sp|Q9Y2A7|NCKP1_HUMAN	3	3	2.7	17.14
sp|Q9Y2E5|MA2B2_HUMAN	14	14	19	187.97
sp|Q9Y2G3|AT11B_HUMAN	2	2	1.4	12.229
sp|Q9Y2T3|GUAD_HUMAN	11	11	34.4	70.69
sp|Q9Y2U8|MAN1_HUMAN	1	1	1.3	6.967
sp|Q9Y2Z0|SGT1_HUMAN	1	1	3.8	7.674
sp|Q9Y315|DEOC_HUMAN	4	4	16.4	41.353
sp|Q9Y316|MEMO1_HUMAN	10	10	52.2	109.19
sp|Q9Y333|LSM2_HUMAN	1	1	20	7.3477
sp|Q9Y337|KLK5_HUMAN	6	6	22.5	72.066
sp|Q9Y342|PLLP_HUMAN	1	1	12.6	7.3919
sp|Q9Y376|CAB39_HUMAN	2	2	6.7	12.541
sp|Q9Y394|DHRS7_HUMAN	2	2	6.5	16.476
sp|Q9Y3A6|TMED5_HUMAN	2	2	10	13.066
sp|Q9Y3B3|TMED7_HUMAN	5	5	29.5	43.85
sp|Q9Y3B6|EMC9_HUMAN	1	1	6.2	6.8939
sp|Q9Y3B8|ORN_HUMAN	5	5	27.8	62.337
sp|Q9Y3C0|WASC3_HUMAN	2	2	10.8	13.097
sp|Q9Y3E0|GOT1B_HUMAN	1	1	6.5	10.99
sp|Q9Y3F4|STRAP_HUMAN	3	3	13.7	22.436
sp|Q9Y3Q3|TMED3_HUMAN	3	3	17.5	27.506
sp|Q9Y3R4|NEUR2_HUMAN	17	17	56.3	255.11
sp|Q9Y446|PKP3_HUMAN	8	8	13.8	53.753
sp|Q9Y487|VPP2_HUMAN	7	5	9.9	30.308
sp|Q9Y490|TLN1_HUMAN	9	9	4.8	86.128
sp|Q9Y4E8|UBP15_HUMAN	8	8	10.8	70.834
sp|Q9Y4K3|TRAF6_HUMAN	1	1	2.3	6.527
sp|Q9Y4L1|HYOU1_HUMAN	1	1	1.5	6.6786
sp|Q9Y4P1|ATG4B_HUMAN	2	2	8.1	12.873
sp|Q9Y4Y9|LSM5_HUMAN	1	1	20.9	7.7742
sp|Q9Y548|YIPF1_HUMAN	1	1	2.9	6.5099
sp|Q9Y5B9|SP16H_HUMAN	3	3	1.9	25.415
sp|Q9Y5K8|VATD_HUMAN	2	2	9.3	13.522
sp|Q9Y5M8|SRPRB_HUMAN	7	7	29.9	44.378
sp|Q9Y5U9|IR3IP_HUMAN	2	2	34.1	36.653
sp|Q9Y5X3|SNX5_HUMAN	2	2	3	11.306
sp|Q9Y5Y6|ST14_HUMAN	1	1	1.3	6.6029
sp|Q9Y5Z4|HEBP2_HUMAN	5	5	27.8	40.892
sp|Q9Y639|NPTN_HUMAN	2	2	7	12.739
sp|Q9Y646|CBPQ_HUMAN	8	8	23.9	62.627
sp|Q9Y6A9|SPCS1_HUMAN	2	2	31.4	13.959
sp|Q9Y6D9|MD1L1_HUMAN	1	1	1.9	7.1971
sp|Q9Y6M5|ZNT1_HUMAN	2	2	5.3	14.175
sp|Q9Y6N5|SQOR_HUMAN	2	2	5.8	12.98
sp|Q9Y6Q5|AP1M2_HUMAN	1	1	2.8	7.544
sp|Q9Y6R7|FCGBP_HUMAN	14	14	5.4	91.238
sp|Q9Y6W5|WASF2_HUMAN	1	1	3.2	6.7466
sp|Q9Y6Y8|S23IP_HUMAN	5	5	5.2	29.699
