# Supplementary material for: Quantitative proteomics analysis of young and elderly skin with DIA mass spectrometry reveals new skin aging-related proteins
Source: Aging (Albany NY). 2020 Jun 29;12(13):13529–54. doi: 10.18632/aging.103461 (PMC7377841; doi:10.18632/aging.103461)
Supplement: Supplementary Table 2 [file aging-12-103461-s008..xlsx]

## Sheet: Sheet1
Table S2. Proteomics data of 20 samples
Protein	case_11	case_12	case_13	case_14	case_15	case_16	case_17	case_18	case_19	case_20	control_1	control_2	control_3	control_4	control_5	control_6	control_7	control_8	control_9	control_10	ProteinGroup
sp|A0A075B6K5|LV39_HUMAN	13.042	9.58526	9.98635	12.6324	11.9817	12.6616	14.1699	14.1633	12.5987	12.8268	11.2102	11.8683	12.855	12.0275	12.5782	13.8122	13.2051	11.6797	10.2831	12.9735	sp|A0A075B6K5|LV39_HUMAN;sp|P80748|LV321_HUMAN
sp|A0A075B6P5|KV228_HUMAN	15.3682	NA	12.311	14.3446	12.6658	14.306	16.1161	16.0259	14.8304	15.2773	13.9299	13.7893	14.7486	13.1861	15.1765	16.0097	14.3218	14.4185	13.6976	15.3802	sp|A0A075B6P5|KV228_HUMAN;sp|A0A075B6S2|KVD29_HUMAN;sp|A0A075B6S6|KVD30_HUMAN;sp|A0A087WW87|KV240_HUMAN;sp|A0A0A0MRZ7|KVD26_HUMAN;sp|A2NJV5|KV229_HUMAN;sp|P06310|KV230_HUMAN
sp|A0A0A0MRZ8|KVD11_HUMAN	16.3282	NA	14.7636	15.641	15.2819	14.6247	16.9168	17.1288	15.4415	16.1285	15.8594	14.8273	15.7774	15.5489	15.5936	16.4882	15.3936	15.4524	14.5985	15.9076	sp|A0A0A0MRZ8|KVD11_HUMAN;sp|P04433|KV311_HUMAN
sp|A0A0B4J1X5|HV374_HUMAN	14.3294	NA	12.9283	14.1801	12.3809	13.849	14.1159	15.3094	14.7044	14.0694	13.9545	NA	13.7954	14.0942	14.6156	15.7471	13.8825	14.6502	13.8121	14.6621	sp|A0A0B4J1X5|HV374_HUMAN;sp|A0A0C4DH42|HV366_HUMAN;sp|P01764|HV323_HUMAN;sp|P01767|HV353_HUMAN;sp|P01768|HV330_HUMAN;sp|P01772|HV333_HUMAN;sp|P0DP02|HVC33_HUMAN
sp|A0A0C4DH25|KVD20_HUMAN	14.611	NA	12.8797	14.8339	13.3574	13.2049	15.5386	14.9372	13.9102	13.6336	12.6407	13.1979	13.7604	13.8988	13.6044	14.5716	13.7445	13.9753	13.082	13.7589	sp|A0A0C4DH25|KVD20_HUMAN
sp|A0A0C4DH31|HV118_HUMAN	NA	NA	NA	NA	NA	NA	NA	11.0662	NA	NA	NA	NA	NA	NA	NA	10.6392	NA	NA	NA	NA	sp|A0A0C4DH31|HV118_HUMAN
sp|A0A0C4DH68|KV224_HUMAN	12.1957	NA	NA	NA	NA	11.6624	12.6619	12.7027	NA	NA	12.7319	NA	11.7154	10.89	12.515	12.5183	NA	11.5675	NA	11.904	sp|A0A0C4DH68|KV224_HUMAN
sp|A0A1B0GTR4|SPRR5_HUMAN	10.2536	11.6277	NA	NA	NA	10.9148	NA	14.6543	NA	NA	NA	9.91148	NA	NA	NA	NA	11.3422	NA	NA	11.5711	sp|A0A1B0GTR4|SPRR5_HUMAN
sp|A0FGR9|ESYT3_HUMAN	13.4753	12.6639	13.2694	13.8676	13.0286	14.2217	12.3304	13.8024	13.8898	13.4909	13.4705	12.6276	13.1612	13.0863	14.0851	13.321	13.049	13.9403	12.9124	13.2389	sp|A0FGR9|ESYT3_HUMAN
sp|A1IGU5|ARH37_HUMAN	NA	NA	NA	13.2058	NA	NA	NA	12.2971	12.5827	NA	12.3529	NA	NA	NA	NA	12.8883	NA	NA	NA	NA	sp|A1IGU5|ARH37_HUMAN
sp|A1L0T0|ILVBL_HUMAN	NA	NA	12.0381	NA	11.6906	NA	NA	11.8185	13.68	NA	12.4364	NA	NA	12.2184	12.7822	12.8429	NA	NA	NA	NA	sp|A1L0T0|ILVBL_HUMAN
sp|A1L3X0|ELOV7_HUMAN	NA	NA	NA	NA	NA	NA	NA	10.4628	10.5157	NA	NA	NA	NA	9.25514	NA	9.03686	NA	NA	NA	NA	sp|A1L3X0|ELOV7_HUMAN
sp|A4D126|ISPD_HUMAN	NA	NA	13.0091	NA	11.3447	12.907	NA	11.5488	12.7114	11.8685	NA	NA	NA	NA	13.757	11.8492	NA	11.6909	12.3621	12.3211	sp|A4D126|ISPD_HUMAN
sp|A4D1P6|WDR91_HUMAN	14.1818	13.6794	15.3338	14.6511	14.9673	15.4397	14.2668	15.2825	15.162	15.245	14.9799	15.2449	15.3539	15.4612	15.6768	15.8139	15.4404	14.8722	15.3865	15.6269	sp|A4D1P6|WDR91_HUMAN
sp|A4D2B0|MBLC1_HUMAN	NA	NA	13.2083	13.4391	NA	NA	NA	NA	NA	NA	11.4025	11.8136	14.1702	13.7398	NA	NA	NA	12.1509	NA	NA	sp|A4D2B0|MBLC1_HUMAN
sp|A6NCN2|KR87P_HUMAN	NA	NA	15.8331	NA	NA	NA	NA	NA	NA	NA	NA	NA	16.5765	NA	NA	NA	NA	11.8565	9.27155	NA	sp|A6NCN2|KR87P_HUMAN
sp|A6NJ64|NPIL2_HUMAN	19.425	18.0893	16.2483	16.2991	15.6151	15.2468	17.817	17.104	15.5274	16.0608	16.9965	16.3098	16.1187	15.7518	15.7251	15.684	16.0584	15.9444	15.8837	15.8832	sp|A6NJ64|NPIL2_HUMAN
sp|A8K2U0|A2ML1_HUMAN	21.1604	20.8793	21.2402	20.4029	20.6234	20.7648	21.1462	21.2811	21.6199	20.4144	20.8054	20.7981	20.6446	21.2564	19.7867	20.4557	20.5327	19.859	20.5368	21.205	sp|A8K2U0|A2ML1_HUMAN
sp|A8MTL9|HMSD_HUMAN	12.2622	12.8127	13.9336	13.2652	13.7904	14.0036	13.0956	14.563	14.4444	12.2279	11.6897	13.4025	13.2391	14.0853	11.5746	13.7132	10.8385	12.1299	13.504	14.3168	sp|A8MTL9|HMSD_HUMAN
sp|A8MWD9|RUXGL_HUMAN	10.6389	9.9949	13.411	13.1075	12.0848	12.9743	NA	14.7165	15.7261	15.0438	12.3517	12.2292	13.2103	13.0366	14.5273	14.746	13.6018	13.6018	13.6284	13.5219	sp|A8MWD9|RUXGL_HUMAN;sp|P62308|RUXG_HUMAN
sp|B3EWG3|FM25A_HUMAN	NA	NA	10.3219	NA	NA	10.7974	NA	13.4187	12.7138	11.6939	NA	9.8807	10.137	10.8063	NA	11.6909	NA	NA	NA	11.3161	sp|B3EWG3|FM25A_HUMAN
sp|B9A064|IGLL5_HUMAN	13.8618	NA	NA	11.1092	12.493	13.4861	14.1483	13.4642	12.3038	11.1156	NA	11.917	11.1242	NA	11.6925	14.3453	12.3531	12.7485	NA	13.5563	sp|B9A064|IGLL5_HUMAN;sp|P0CG04|IGLC1_HUMAN;sp|P0DOX8|IGL1_HUMAN
sp|E9PAV3|NACAM_HUMAN	NA	10.9164	10.7506	11.2688	NA	NA	NA	13.6202	11.5441	NA	12.0585	9.86899	NA	12.1186	NA	NA	NA	12.794	10.253	11.2488	sp|E9PAV3|NACAM_HUMAN;sp|Q13765|NACA_HUMAN
sp|O00115|DNS2A_HUMAN	16.2308	15.7601	15.6277	16.1983	15.5155	15.6621	15.4985	16.6276	16.2824	16.9294	15.711	15.5525	15.386	15.712	15.7387	15.7889	15.7292	15.3614	14.6858	16.0515	sp|O00115|DNS2A_HUMAN
sp|O00154|BACH_HUMAN	11.3431	10.489	12.1068	NA	NA	10.5423	NA	13.3528	12.8021	11.0845	10.7718	NA	NA	10.44	12.3145	11.3373	NA	11.7761	11.5256	11.2249	sp|O00154|BACH_HUMAN
sp|O00161|SNP23_HUMAN	11.1783	10.5111	9.75174	10.581	11.3967	10.521	10.8922	10.9159	11.142	11.1093	11.0965	11.1794	11.3446	10.9709	11.0841	12.2707	11.0006	12.4611	10.961	11.975	sp|O00161|SNP23_HUMAN
sp|O00194|RB27B_HUMAN	9.42678	9.94097	10.4102	9.86117	9.88655	10.6029	10.084	10.7665	11.7241	9.74478	10.5563	9.89222	10.9496	10.4249	11.6006	10.1702	9.02749	9.50311	9.35077	9.45576	sp|O00194|RB27B_HUMAN
sp|O00204|ST2B1_HUMAN	12.8445	12.6225	12.2247	NA	12.745	11.9742	NA	15.5718	14.3649	13.3399	13.247	NA	12.6992	NA	NA	13.1941	12.9364	13.324	12.0489	12.5385	sp|O00204|ST2B1_HUMAN
sp|O00231|PSD11_HUMAN	7.46445	9.43371	10.2227	9.00547	8.96656	9.45558	8.73592	13.9596	11.0189	9.57643	9.33301	9.5873	7.19626	9.1431	9.74374	7.67288	9.70657	8.49177	9.40856	9.3311	sp|O00231|PSD11_HUMAN
sp|O00299|CLIC1_HUMAN	14.1019	13.0175	13.4218	14.0007	12.9036	13.6258	14.1363	16.4205	14.8292	14.1984	13.6321	13.0508	13.1677	13.5261	13.6178	14.2591	14.0881	14.4912	14.0655	13.9888	sp|O00299|CLIC1_HUMAN
sp|O00303|EIF3F_HUMAN	NA	NA	NA	NA	NA	NA	NA	13.3939	NA	NA	NA	NA	NA	NA	NA	10.293	NA	NA	NA	11.229	sp|O00303|EIF3F_HUMAN
sp|O00391|QSOX1_HUMAN	16.0797	15.8428	15.122	15.9714	15.5734	15.6722	15.8754	15.9756	16.4309	15.7328	15.531	15.0067	16.1746	15.6503	15.6224	16.1905	15.7519	15.06	15.7959	15.9204	sp|O00391|QSOX1_HUMAN
sp|O00423|EMAL1_HUMAN	NA	NA	12.6521	10.493	NA	13.2524	NA	10.7394	11.1116	NA	NA	NA	NA	10.3497	12.7177	12.3089	NA	NA	NA	NA	sp|O00423|EMAL1_HUMAN
sp|O00429|DNM1L_HUMAN	NA	NA	13.0933	12.7685	12.4262	11.5646	NA	13.0972	11.1079	13.6225	NA	10.5595	NA	11.0415	12.071	NA	NA	NA	NA	NA	sp|O00429|DNM1L_HUMAN
sp|O00462|MANBA_HUMAN	13.9123	14.4313	14.2906	13.4636	13.7295	13.7804	14.2058	14.7339	14.3542	14.5735	13.3972	13.8556	13.9993	13.6846	13.6906	12.9998	13.7551	13.001	13.4146	14.2419	sp|O00462|MANBA_HUMAN
sp|O00506|STK25_HUMAN	NA	NA	NA	12.0358	NA	NA	NA	13.4735	NA	NA	NA	NA	NA	NA	NA	12.5063	NA	NA	NA	NA	sp|O00506|STK25_HUMAN;sp|Q9P289|STK26_HUMAN;sp|Q9Y6E0|STK24_HUMAN
sp|O00534|VMA5A_HUMAN	14.6939	15.2154	15.3161	14.7845	14.266	15.692	15.1118	15.6911	14.3133	14.6062	14.3392	15.0742	14.6801	14.8098	15.4766	15.0558	15.0978	13.8857	15.5121	14.6238	sp|O00534|VMA5A_HUMAN
sp|O00560|SDCB1_HUMAN	13.3479	NA	11.6911	12.1507	11.1068	11.7799	13.6773	11.9992	12.5613	10.7751	11.3657	NA	12.9056	12.588	13.7707	11.9061	11.6914	10.8947	NA	11.377	sp|O00560|SDCB1_HUMAN
sp|O00571|DDX3X_HUMAN	14.429	13.5257	13.3338	13.4942	13.4127	13.5999	13.3259	15.7916	15.4563	14.8865	13.1971	11.7927	13.3126	13.2331	13.0167	14.0629	13.1337	15.232	13.5509	14.836	sp|O00571|DDX3X_HUMAN
sp|O00584|RNT2_HUMAN	12.0456	12.9737	12.5011	12.2055	11.8843	12.6422	11.5544	13.4602	13.7259	12.7954	12.661	11.6363	12.2169	13.2393	12.0754	12.6091	12.5664	12.6433	12.1442	12.8968	sp|O00584|RNT2_HUMAN
sp|O00628|PEX7_HUMAN	12.967	12.8013	12.3674	12.2809	12.4197	13.2186	12.0743	12.6302	12.6147	13.3925	13.0099	12.7624	13.0919	13.1873	13.6507	13.1486	12.8693	12.7035	13.0441	12.5747	sp|O00628|PEX7_HUMAN
sp|O00743|PPP6_HUMAN	NA	NA	NA	NA	NA	NA	NA	8.66941	8.21489	NA	NA	NA	NA	NA	NA	NA	NA	NA	NA	NA	sp|O00743|PPP6_HUMAN
sp|O00754|MA2B1_HUMAN	13.5988	15.1038	15.7371	15.3948	15.5446	16.1317	14.201	15.7385	16.6401	16.5375	15.4657	15.8951	15.9795	15.9148	16.3275	16.3871	15.8414	15.4515	16.2782	16.6157	sp|O00754|MA2B1_HUMAN
sp|O00757|F16P2_HUMAN	12.8842	NA	12.2666	NA	NA	NA	NA	13.1331	NA	NA	12.0482	NA	13.4352	12.9865	13.0225	NA	NA	NA	NA	NA	sp|O00757|F16P2_HUMAN
sp|O14618|CCS_HUMAN	10.1441	8.33129	13.0949	12.0698	13.1887	10.9021	10.4591	11.9604	16.1342	14.1601	13.9896	10.247	11.3294	12.0356	13.6959	11.3609	NA	12.6782	10.1231	11.51	sp|O14618|CCS_HUMAN
sp|O14662|STX16_HUMAN	12.1186	12.2634	11.2279	12.1997	11.4293	11.6811	11.8213	11.9032	11.9705	NA	12.3012	12.553	NA	12.131	12.4383	11.5737	11.5821	12.3015	12.451	12.0669	sp|O14662|STX16_HUMAN
sp|O14732|IMPA2_HUMAN	15.7762	16.7647	17.7154	17.5863	17.1873	18.1628	16.7328	17.6172	18.726	17.3031	17.0362	17.4063	17.8077	17.6848	17.3548	17.3553	17.1305	17.5214	17.1889	17.625	sp|O14732|IMPA2_HUMAN
sp|O14735|CDIPT_HUMAN	11.1256	12.6666	12.7004	11.9428	11.8737	13.48	12.0648	11.7427	12.3293	NA	10.8867	12.4151	11.8748	12.0031	11.5785	12.0865	12.7164	11.4928	12.7983	12.4548	sp|O14735|CDIPT_HUMAN
sp|O14744|ANM5_HUMAN	13.666	NA	16.4145	15.1394	15.009	15.6603	14.4288	14.309	16.6591	13.8572	13.1823	15.1769	14.419	14.545	16.5071	15.1053	13.8521	13.7491	14.3203	14.7803	sp|O14744|ANM5_HUMAN
sp|O14773|TPP1_HUMAN	18.9604	18.7652	17.9368	18.5561	18.2818	18.5425	19.0213	18.8148	18.7004	19.393	19.116	18.3138	18.6927	18.9705	18.4175	18.7925	18.7453	19.1128	18.6007	18.8096	sp|O14773|TPP1_HUMAN
sp|O14818|PSA7_HUMAN	17.2305	18.2136	19.2253	18.8332	18.6909	19.2625	18.454	19.3507	19.4127	19.0264	18.8698	19.0444	19.0469	18.9636	19.1748	19.0044	19.0071	18.6496	19.3098	19.1847	sp|O14818|PSA7_HUMAN
sp|O14841|OPLA_HUMAN	NA	11.4926	13.0103	12.5797	11.4655	12.5376	NA	12.4976	15.1354	14.2455	12.3296	10.8325	13.6089	12.9659	13.1703	13.0359	11.4682	9.75689	11.4328	11.7734	sp|O14841|OPLA_HUMAN
sp|O14950|ML12B_HUMAN	NA	NA	NA	NA	10.7598	11.1485	11.5808	14.3548	12.628	11.2356	11.468	NA	11.3706	10.3571	11.2557	9.99494	10.1888	11.2559	11.3167	11.6634	sp|O14950|ML12B_HUMAN;sp|P19105|ML12A_HUMAN
sp|O15020|SPTN2_HUMAN	NA	NA	NA	NA	NA	NA	NA	12.5705	9.94883	NA	NA	NA	NA	NA	NA	NA	NA	9.47764	NA	NA	sp|O15020|SPTN2_HUMAN
sp|O15031|PLXB2_HUMAN	10.4966	NA	NA	NA	NA	NA	NA	10.4445	10.0881	NA	NA	NA	NA	NA	9.42386	10.4065	NA	NA	NA	NA	sp|O15031|PLXB2_HUMAN
sp|O15042|SR140_HUMAN	NA	NA	NA	NA	NA	NA	NA	NA	12.0768	11.0545	NA	NA	NA	NA	10.8492	NA	NA	NA	NA	NA	sp|O15042|SR140_HUMAN
sp|O15118|NPC1_HUMAN	15.6051	15.7868	15.3903	16.1581	15.2312	16.0253	16.0199	16.3449	16.2795	14.6689	16.4139	16.3421	16.1718	16.0187	16.1162	16.2579	15.9355	15.9065	16.2816	15.8637	sp|O15118|NPC1_HUMAN
sp|O15144|ARPC2_HUMAN	11.4902	11.0465	11.0907	10.8183	10.9392	11.3587	11.115	15.503	13.6406	13.5072	11.6368	NA	11.2257	11.119	10.8832	11.6218	10.985	12.6346	10.8148	12.1638	sp|O15144|ARPC2_HUMAN
sp|O15254|ACOX3_HUMAN	NA	NA	NA	NA	NA	NA	NA	11.2729	11.7287	NA	NA	NA	NA	NA	NA	NA	NA	9.76898	NA	NA	sp|O15254|ACOX3_HUMAN
sp|O15260|SURF4_HUMAN	13.6739	13.2359	13.0968	14.0161	13.5384	13.5453	13.2186	13.9983	14.4146	11.8218	13.1789	13.895	13.3845	14.1889	14.4936	13.6201	13.5987	12.9663	13.847	14.0072	sp|O15260|SURF4_HUMAN
sp|O15296|LX15B_HUMAN	NA	NA	14.2751	11.6645	12.9677	NA	NA	12.7271	12.759	10.6582	NA	NA	NA	9.93409	11.006	10.9585	NA	10.6106	NA	11.3136	sp|O15296|LX15B_HUMAN
sp|O15372|EIF3H_HUMAN	11.3266	NA	NA	NA	NA	NA	NA	12.5675	NA	NA	NA	NA	NA	NA	NA	NA	NA	11.3028	NA	NA	sp|O15372|EIF3H_HUMAN
sp|O15382|BCAT2_HUMAN	NA	NA	11.8453	NA	NA	11.8177	NA	NA	11.8175	10.8773	10.4798	NA	NA	12.0499	11.4549	NA	NA	NA	NA	10.9018	sp|O15382|BCAT2_HUMAN
sp|O15400|STX7_HUMAN	9.43451	9.68363	9.85361	10.0087	9.02237	24.5935	10.5647	11.2928	10.3923	7.87478	10.7688	11.1951	9.97312	10.0538	11.941	9.92361	10.0343	12.0895	10.7427	11.8681	sp|O15400|STX7_HUMAN
sp|O15431|COPT1_HUMAN	13.7946	13.2676	13.213	13.3717	12.6497	13.5946	12.6489	12.9557	13.8982	10.0016	14.1682	13.9292	13.5926	14.0916	13.9554	13.4195	13.4826	12.8624	13.6298	13.8056	sp|O15431|COPT1_HUMAN
sp|O15455|TLR3_HUMAN	10.3525	10.9621	11.0814	11.0196	11.3269	10.7632	10.8326	11.6307	10.2751	11.3816	10.9438	11.36	10.9621	10.629	10.1747	11.4734	11.4449	10.5128	11.6268	11.8568	sp|O15455|TLR3_HUMAN
sp|O15498|YKT6_HUMAN	NA	NA	NA	NA	NA	11.0363	NA	11.6532	NA	NA	12.0759	NA	NA	NA	NA	11.3716	10.8943	11.8047	NA	NA	sp|O15498|YKT6_HUMAN
sp|O15533|TPSN_HUMAN	14.2667	13.9369	14.5636	13.3777	13.7814	13.5724	14.4257	14.6659	14.9669	14.4586	14.4305	14.3475	14.3373	15.0482	13.053	13.7877	13.7934	13.7484	13.1054	14.171	sp|O15533|TPSN_HUMAN
sp|O43149|ZZEF1_HUMAN	10.5786	10.841	NA	10.3775	NA	10.3677	NA	12.0109	10.5805	12.1335	12.8911	10.5385	10.8288	11.2201	9.59601	NA	10.2447	10.1438	11.362	11.1312	sp|O43149|ZZEF1_HUMAN
sp|O43175|SERA_HUMAN	12.802	NA	10.6539	10.4479	11.35	10.8067	12.8749	14.0095	13.5115	11.8661	11.8073	9.36892	11.6682	10.6797	11.0639	12.2797	11.9501	12.804	11.0733	12.3383	sp|O43175|SERA_HUMAN
sp|O43240|KLK10_HUMAN	15.7585	15.2976	14.5444	15.6274	15.7448	15.2157	14.7659	17.2257	16.4826	15.5837	15.6484	14.0508	16.0794	15.9303	15.0697	15.4677	14.4988	15.5229	14.6847	14.9185	sp|O43240|KLK10_HUMAN
sp|O43278|SPIT1_HUMAN	13.2825	11.1946	10.739	11.5753	NA	11.8036	13.1276	13.8329	13.3445	11.1142	10.7996	NA	11.046	NA	NA	10.5847	NA	11.5194	10.5158	10.8271	sp|O43278|SPIT1_HUMAN
sp|O43396|TXNL1_HUMAN	NA	NA	NA	NA	NA	NA	NA	14.0944	12.211	NA	9.03832	NA	NA	NA	NA	NA	NA	10.8587	11.0376	NA	sp|O43396|TXNL1_HUMAN
sp|O43464|HTRA2_HUMAN	NA	10.6238	11.2315	11.6037	10.6547	11.1567	NA	NA	11.7969	11.1329	11.1693	11.0217	11.7289	12.0131	11.0478	12.1311	11.6702	11.0512	12.0879	11.6449	sp|O43464|HTRA2_HUMAN
sp|O43504|LTOR5_HUMAN	NA	NA	NA	NA	12.3372	NA	NA	13.3959	13.08	13.5659	12.4853	NA	13.0499	12.3175	12.605	13.0005	12.7642	12.5533	12.8078	13.0103	sp|O43504|LTOR5_HUMAN
sp|O43548|TGM5_HUMAN	16.5842	16.4247	17.4672	16.5312	16.8511	17.6396	16.7899	16.6269	18.26	17.5387	16.2925	16.874	16.4648	16.6875	17.5228	17.2782	16.4549	16.7301	16.2372	16.5749	sp|O43548|TGM5_HUMAN
sp|O43567|RNF13_HUMAN	15.1182	15.2523	14.5628	14.8042	13.8662	15.074	14.7984	15.3957	14.9342	15.0432	14.9673	14.6436	14.6504	13.7235	14.7236	14.6256	14.8105	14.682	14.5373	14.625	sp|O43567|RNF13_HUMAN
sp|O43598|DNPH1_HUMAN	NA	NA	NA	NA	NA	NA	5.92268	6.29266	10.4434	NA	13.5528	6.65807	NA	11.4319	5.39246	5.90693	NA	6.01174	6.06693	6.74093	sp|O43598|DNPH1_HUMAN
sp|O43707|ACTN4_HUMAN	13.5334	8.04615	9.29923	13.2493	8.41787	8.93804	8.58526	16.8415	16.0774	9.14336	12.9236	7.51062	8.59705	8.40822	8.58876	13.7142	8.97718	9.87607	9.09303	8.71656	sp|O43707|ACTN4_HUMAN
sp|O43759|SNG1_HUMAN	16.3929	16.846	16.5203	17.4249	15.9855	16.9998	16.848	13.606	15.2311	14.2197	15.3385	17.6665	14.6228	13.8624	17.171	13.9461	16.2484	16.9526	16.6152	15.9837	sp|O43759|SNG1_HUMAN
sp|O43760|SNG2_HUMAN	14.3068	13.9669	13.5825	14.6462	14.0633	13.7289	13.8475	14.0966	14.3849	10.4231	13.9738	14.1557	13.9044	13.8316	14.3849	13.981	13.5723	13.7643	14.1012	14.0247	sp|O43760|SNG2_HUMAN
sp|O43776|SYNC_HUMAN	NA	NA	NA	10.2388	NA	NA	NA	12.2349	NA	NA	NA	NA	10.3255	NA	NA	NA	NA	11.7273	10.5964	10.6408	sp|O43776|SYNC_HUMAN
sp|O43790|KRT86_HUMAN	17.5948	20.107	20.0799	19.5829	19.6792	20.272	17.8214	20.5971	18.766	18.4088	21.9718	18.3294	20.8768	21.2674	18.422	20.7668	20.9143	22.7167	21.9554	18.2449	sp|O43790|KRT86_HUMAN
sp|O43813|LANC1_HUMAN	NA	NA	NA	NA	NA	NA	NA	15.0622	15.3002	13.3147	13.0723	NA	NA	NA	NA	NA	NA	13.9146	NA	NA	sp|O43813|LANC1_HUMAN
sp|O43847|NRDC_HUMAN	NA	9.40315	NA	NA	9.31565	10.2503	NA	10.1701	11.7625	NA	NA	NA	NA	10.3746	9.52976	NA	NA	NA	NA	NA	sp|O43847|NRDC_HUMAN
sp|O60259|KLK8_HUMAN	15.0267	14.3033	11.3562	14.6714	15.3797	14.0688	13.4008	15.1379	14.5853	15.1098	15.4298	13.9796	15.5318	14.6287	14.7403	15.9237	14.395	14.2595	12.3738	14.8791	sp|O60259|KLK8_HUMAN
sp|O60313|OPA1_HUMAN	16.0015	12.15	17.7436	18.3991	13.3899	11.4964	18.4351	NA	17.1667	16.3297	17.2855	17.012	16.4635	14.7986	16.4939	16.6581	16.1305	16.4266	16.0794	14.6155	sp|O60313|OPA1_HUMAN
sp|O60437|PEPL_HUMAN	11.8643	11.3576	11.4708	11.9109	10.7084	10.4558	12.3316	15.6995	13.1799	12.2619	11.5348	11.1639	12.085	11.9384	11.4063	11.9225	12.1051	11.829	12.2545	11.9475	sp|O60437|PEPL_HUMAN
sp|O60610|DIAP1_HUMAN	NA	NA	NA	NA	NA	NA	NA	10.6667	8.44929	NA	NA	NA	NA	NA	NA	NA	NA	7.31829	NA	NA	sp|O60610|DIAP1_HUMAN
sp|O60664|PLIN3_HUMAN	NA	NA	NA	10.7915	NA	NA	NA	12.9439	NA	11.1001	10.8126	NA	9.73391	11.2558	NA	NA	NA	NA	NA	11.4354	sp|O60664|PLIN3_HUMAN
sp|O60701|UGDH_HUMAN	NA	NA	NA	11.1881	NA	NA	NA	NA	NA	NA	10.9132	NA	NA	NA	NA	NA	NA	11.8478	NA	NA	sp|O60701|UGDH_HUMAN
sp|O60814|H2B1K_HUMAN	11.0836	10.1588	10.655	10.2981	9.16419	10.0526	9.77891	12.6764	10.1274	9.24741	9.76913	NA	11.146	9.88688	9.21135	11.394	10.7759	12.323	11.7731	10.225	sp|O60814|H2B1K_HUMAN;sp|P06899|H2B1J_HUMAN;sp|P23527|H2B1O_HUMAN;sp|P33778|H2B1B_HUMAN;sp|P57053|H2BFS_HUMAN;sp|P58876|H2B1D_HUMAN;sp|P62807|H2B1C_HUMAN;sp|Q16778|H2B2E_HUMAN;sp|Q5QNW6|H2B2F_HUMAN;sp|Q8N257|H2B3B_HUMAN;sp|Q93079|H2B1H_HUMAN;sp|Q99877|H2B1N_HUMAN;sp|Q99879|H2B1M_HUMAN;sp|Q99880|H2B1L_HUMAN
sp|O60888|CUTA_HUMAN	16.5831	16.3675	17.5309	16.8487	16.6447	17.24	16.821	15.8099	17.088	15.8737	17.1203	16.7453	16.5731	16.125	17.0826	17.2195	16.327	15.504	16.1208	17.0407	sp|O60888|CUTA_HUMAN
sp|O60911|CATL2_HUMAN	18.6408	18.8676	19.0854	18.5531	18.0202	18.4979	18.5349	19.3954	18.9406	18.8622	19.1867	18.6004	18.5531	19.3604	18.5121	18.6908	18.7217	18.2897	18.7016	18.586	sp|O60911|CATL2_HUMAN
sp|O75083|WDR1_HUMAN	NA	NA	NA	NA	NA	NA	NA	13.3175	10.3272	10.723	10.3644	NA	NA	NA	NA	NA	NA	11.1177	NA	NA	sp|O75083|WDR1_HUMAN
sp|O75131|CPNE3_HUMAN	16.8504	16.2438	17.3515	17.4365	17.1646	17.4332	16.8311	17.4882	17.8521	17.8143	17.0391	17.0699	17.1217	17.1115	17.4671	17.4304	17.2377	17.693	17.2206	17.3702	sp|O75131|CPNE3_HUMAN
sp|O75146|HIP1R_HUMAN	NA	NA	NA	NA	NA	NA	NA	12.8873	NA	NA	11.9856	12.7784	NA	12.2905	13.2591	NA	NA	13.2106	NA	14.3329	sp|O75146|HIP1R_HUMAN
sp|O75223|GGCT_HUMAN	21.4633	21.9014	21.1185	21.4422	21.6758	22.1665	20.2046	22.0821	21.7081	22.616	22.4838	21.1126	22.384	21.9149	21.8545	21.2357	22.142	21.8072	22.3619	21.6287	sp|O75223|GGCT_HUMAN
sp|O75326|SEM7A_HUMAN	NA	NA	NA	NA	NA	NA	NA	12.0241	12.4378	12.2288	NA	NA	NA	NA	NA	10.8066	NA	NA	10.547	11.0952	sp|O75326|SEM7A_HUMAN
sp|O75340|PDCD6_HUMAN	13.6953	13.5851	14.1755	13.8803	13.8034	14.6753	13.7318	15.4497	15.5821	16.1518	14.2722	13.4453	14.7643	14.601	15.133	15.4015	13.9783	14.7874	13.9792	14.9759	sp|O75340|PDCD6_HUMAN
sp|O75342|LX12B_HUMAN	18.9243	18.6953	19.3324	18.8407	19.2761	19.2821	19.5271	19.1211	18.3219	19.7941	18.9059	19.0039	18.924	19.1153	19.1337	18.8356	18.8738	19.1196	19.1681	18.9488	sp|O75342|LX12B_HUMAN
sp|O75369|FLNB_HUMAN	15.0496	15.6706	15.1414	16.089	15.922	16.0483	14.4511	16.4062	15.8675	16.241	16.7126	14.305	15.3542	15.901	16.3217	16.4619	15.0362	15.5656	15.2761	16.0365	sp|O75369|FLNB_HUMAN
sp|O75396|SC22B_HUMAN	14.8075	15.0554	14.5843	14.3989	13.8664	13.8737	14.7506	14.8378	14.7526	12.0809	14.5767	14.4454	14.5367	14.4444	14.9096	14.5048	14.4147	14.349	14.5894	14.1032	sp|O75396|SC22B_HUMAN
sp|O75436|VP26A_HUMAN	13.8274	12.9567	14.8669	14.7376	13.888	14.186	13.2071	14.3101	16.2541	13.8869	14.6151	13.3028	13.1453	13.9377	15.9364	14.8372	12.5293	15.1332	13.433	14.0776	sp|O75436|VP26A_HUMAN
sp|O75477|ERLN1_HUMAN	NA	14.5208	14.4275	NA	NA	13.9252	NA	NA	14.1462	NA	14.0956	NA	13.1621	NA	14.3319	15.2202	14.7188	14.1531	NA	NA	sp|O75477|ERLN1_HUMAN
sp|O75503|CLN5_HUMAN	12.952	13.2415	12.7122	12.7938	12.0952	12.8641	12.937	12.6106	12.4816	12.2928	13.5291	12.3427	12.7924	12.7176	12.7696	13.6258	13.3481	12.2098	13.2599	13.3291	sp|O75503|CLN5_HUMAN
sp|O75506|HSBP1_HUMAN	NA	NA	NA	NA	NA	NA	NA	11.6264	NA	NA	NA	NA	10.6074	NA	NA	11.703	NA	12.1581	NA	NA	sp|O75506|HSBP1_HUMAN
sp|O75531|BAF_HUMAN	9.10587	8.4294	8.30479	12.4115	10.2341	11.0653	7.73896	13.3962	13.2922	12.8388	12.6387	11.5027	14.2508	12.1529	12.6487	14.0845	12.9245	12.8233	13.9132	14.7972	sp|O75531|BAF_HUMAN
sp|O75592|MYCB2_HUMAN	14.1164	14.2363	13.5586	14.6792	13.8759	14.6086	12.7621	15.0447	14.5012	15.4844	14.9797	13.1139	14.4824	14.5795	15.1765	15.4299	15.2921	15.1963	15.2539	14.8378	sp|O75592|MYCB2_HUMAN
sp|O75608|LYPA1_HUMAN	16.1846	14.0357	18.6349	18.6427	17.7686	17.9464	15.8273	16.5809	19.3125	17.3508	17.2854	17.2849	17.5029	17.8055	19.0826	18.3417	16.1987	15.8966	16.932	18.155	sp|O75608|LYPA1_HUMAN
sp|O75629|CREG1_HUMAN	19.6144	19.4732	19.4983	19.6528	18.9477	19.3178	19.5885	19.9386	19.8278	20.0054	19.6527	19.1766	19.5841	19.8752	19.333	19.6976	19.6583	18.9557	19.7193	19.6918	sp|O75629|CREG1_HUMAN
sp|O75635|SPB7_HUMAN	20.02	20.0232	20.3983	20.4167	20.2253	20.22	20.2944	20.5088	19.7605	20.508	19.2094	19.7879	20.4213	20.4058	20.2761	20.3011	20.1245	18.9842	19.8941	19.9144	sp|O75635|SPB7_HUMAN
sp|O75787|RENR_HUMAN	14.2781	14.429	12.7923	13.9044	12.2791	13.4003	14.2132	14.3359	14.8681	13.8096	12.7101	12.8836	12.808	13.2517	12.9156	13.0125	12.5025	12.4156	13.1152	12.5556	sp|O75787|RENR_HUMAN
sp|O75832|PSD10_HUMAN	12.0376	12.4581	13.7426	12.8953	13.2737	13.2522	12.4945	13.2054	14.6581	13.2396	13.8254	13.4172	13.7472	13.6883	14.3735	14.1995	11.526	13.1569	11.9235	13.3842	sp|O75832|PSD10_HUMAN
sp|O75874|IDHC_HUMAN	16.1998	13.1061	17.1976	17.3807	16.2497	16.9859	14.375	17.6872	19.4822	17.0569	17.5057	16.6274	17.4968	18.4168	18.0113	18.2572	17.7364	18.0186	18.988	18.3945	sp|O75874|IDHC_HUMAN
sp|O75964|ATP5L_HUMAN	NA	11.5901	12.3214	11.2605	11.3627	12.5411	NA	12.2481	12.0089	11.301	NA	11.7598	12.164	13.023	11.5439	NA	10.9258	10.7683	12.2025	11.3114	sp|O75964|ATP5L_HUMAN
sp|O76009|KT33A_HUMAN	13.8293	16.0266	17.0208	16.244	17.3139	16.3329	15.1419	18.5505	16.685	14.4419	16.8838	14.609	17.3987	17.5124	14.2701	16.4512	17.541	17.8983	19.5359	14.8018	sp|O76009|KT33A_HUMAN
sp|O76011|KRT34_HUMAN	15.7038	18.0006	17.4392	17.2978	17.8949	17.9043	15.8444	19.0739	16.4442	16.5226	19.573	16.0227	18.5908	17.977	16.1376	18.5849	18.6754	20.6883	19.1727	16.0079	sp|O76011|KRT34_HUMAN
sp|O76013|KRT36_HUMAN	13.7349	17.0061	16.7388	16.1357	16.2942	16.3044	13.8622	17.673	15.3625	14.9686	17.5657	13.6785	16.6492	17.5769	14.5621	16.9558	17.3744	18.8872	17.2434	14.3106	sp|O76013|KRT36_HUMAN
sp|O76015|KRT38_HUMAN	NA	15.0547	15.0564	15.0099	15.2194	14.1149	NA	17.1718	13.7521	11.4941	15.8131	10.9162	15.8411	15.2672	NA	15.8429	15.8971	17.7047	15.4849	12.0029	sp|O76015|KRT38_HUMAN
sp|O76027|ANXA9_HUMAN	13.3361	13.4744	NA	NA	NA	NA	12.7464	13.8869	13.1684	NA	NA	NA	12.3433	NA	NA	13.8485	13.1198	NA	NA	NA	sp|O76027|ANXA9_HUMAN
sp|O76062|ERG24_HUMAN	11.5034	11.8254	11.7789	12.8995	11.6107	11.6804	11.8793	11.7872	14.7309	NA	11.1872	12.0828	11.6208	12.3124	12.7396	11.2335	11.8734	12.4807	12.3309	12.8097	sp|O76062|ERG24_HUMAN
sp|O94760|DDAH1_HUMAN	12.7086	12.6691	15.5636	15.7512	14.8365	15.2619	13.7679	14.6179	16.4146	16.9962	15.5881	15.6352	15.9386	15.8405	16.4083	16.3631	15.816	14.1179	15.8852	16.3448	sp|O94760|DDAH1_HUMAN
sp|O94804|STK10_HUMAN	13.2076	11.9108	12.6582	12.1583	12.2634	12.7708	12.6996	12.9841	13.0384	12.2246	12.641	12.5783	12.1995	12.775	12.7288	12.7094	12.177	12.2337	11.9741	12.4737	sp|O94804|STK10_HUMAN
sp|O94876|TMCC1_HUMAN	13.2176	12.7393	12.2487	12.2392	12.6642	12.8456	11.7672	11.7737	12.1564	10.1831	13.3368	10.7934	12.0678	12.5783	11.086	13.0378	10.9815	12.4596	11.1679	12.1064	sp|O94876|TMCC1_HUMAN
sp|O94901|SUN1_HUMAN	14.7648	14.5934	14.8027	14.5955	14.9635	14.9778	15.4964	15.1791	15.8273	15.4183	15.0401	14.5216	15.2718	15.246	14.8132	15.2456	14.5464	14.084	14.7324	15.139	sp|O94901|SUN1_HUMAN
sp|O94905|ERLN2_HUMAN	14.8678	14.1334	15.5469	14.7698	14.5802	15.4735	15.0345	14.6284	15.2614	14.3362	14.8256	14.7946	14.8435	15.3506	15.444	15.06	14.1472	13.8297	14.1387	15.0589	sp|O94905|ERLN2_HUMAN
sp|O94919|ENDD1_HUMAN	12.1042	12.2995	11.8557	12.1449	12.016	12.3198	12.4284	12.8556	13.6678	NA	11.9643	12.4005	12.3592	12.6165	13.4414	13.2618	11.4015	10.8139	11.8059	10.7935	sp|O94919|ENDD1_HUMAN
sp|O94973|AP2A2_HUMAN	13.0635	12.3737	12.9235	13.5869	12.5771	12.6698	12.3601	14.4982	14.1936	14.595	14.0357	13.3573	13.5593	13.6465	14.244	13.5241	13.7049	14.1661	13.9362	13.5011	sp|O94973|AP2A2_HUMAN
sp|O95070|YIF1A_HUMAN	12.2619	13.4237	12.2395	13.2501	12.2679	12.5167	11.888	12.3062	NA	NA	11.5451	NA	12.9228	13.0278	13.3942	13.0526	12.9085	12.5772	13.1763	NA	sp|O95070|YIF1A_HUMAN
sp|O95147|DUS14_HUMAN	NA	NA	NA	NA	NA	NA	NA	10.9522	NA	NA	10.5575	NA	NA	NA	NA	NA	NA	12.3778	NA	NA	sp|O95147|DUS14_HUMAN
sp|O95164|UBL3_HUMAN	10.9797	10.5395	10.8856	11.0131	11.8772	11.8042	11.9659	12.2168	11.9751	12.1016	12.2669	11.6177	12.5844	12.9328	11.299	12.369	11.131	NA	10.4308	12.1115	sp|O95164|UBL3_HUMAN
sp|O95171|SCEL_HUMAN	14.4895	12.9995	13.4092	11.6458	13.0629	13.346	12.4157	14.9944	13.2445	12.3452	11.4312	12.2363	13.1158	12.2278	12.8708	13.4651	12.8178	12.7141	12.5963	13.5581	sp|O95171|SCEL_HUMAN
sp|O95197|RTN3_HUMAN	14.3788	14.695	14.1417	15.0971	14.234	14.4876	15.138	14.3808	14.9621	13.5203	14.3122	14.6616	14.889	14.8871	14.7996	14.6553	14.1579	14.2163	14.9369	14.4192	sp|O95197|RTN3_HUMAN
sp|O95274|LYPD3_HUMAN	15.0272	13.4255	12.6103	13.7984	13.1514	13.2222	14.6654	15.6831	14.427	14.1123	13.4956	12.9702	14.5487	13.3149	12.9167	13.8112	13.4637	13.1504	12.9859	13.8685	sp|O95274|LYPD3_HUMAN
sp|O95292|VAPB_HUMAN	NA	NA	11.1978	10.3518	NA	11.4594	NA	11.7818	11.7075	NA	NA	NA	10.1034	NA	11.738	NA	10.901	NA	NA	NA	sp|O95292|VAPB_HUMAN
sp|O95294|RASL1_HUMAN	10.6648	NA	11.7363	11.1872	13.179	13.6086	10.5431	14.2989	14.1776	14.5882	13.3667	12.3939	13.1777	13.294	11.3663	13.7942	14.0459	13.8678	13.3598	12.4269	sp|O95294|RASL1_HUMAN
sp|O95336|6PGL_HUMAN	NA	NA	NA	NA	NA	NA	NA	13.275	11.8928	NA	NA	NA	NA	NA	NA	NA	NA	NA	NA	NA	sp|O95336|6PGL_HUMAN
sp|O95361|TRI16_HUMAN	12.8113	11.7265	12.1405	11.0232	11.4573	13.328	11.1876	13.0785	12.2154	10.2249	11.5767	NA	12.0795	11.4483	10.6247	12.5468	10.8907	11.7214	10.9494	12.3544	sp|O95361|TRI16_HUMAN;sp|Q309B1|TR16L_HUMAN
sp|O95470|SGPL1_HUMAN	13.6679	13.7727	13.9291	13.799	12.8348	14.0243	13.6509	13.7669	14.5975	12.5397	13.7276	13.8423	13.8832	14.4876	13.8583	13.5841	13.5965	12.6069	13.5066	13.7881	sp|O95470|SGPL1_HUMAN
sp|O95479|G6PE_HUMAN	11.8548	11.4639	14.7773	13.7271	13.5942	14.7265	12.8049	14.6805	15.5323	15.0761	13.3645	14.5921	13.8587	14.9969	15.4966	14.577	14.2405	14.0818	14.4049	14.9555	sp|O95479|G6PE_HUMAN
sp|O95562|SFT2B_HUMAN	11.4697	11.9495	11.1985	12.5476	10.5219	10.4338	11.6514	11.3558	11.8185	NA	11.2621	12.8892	11.0257	11.9857	11.3586	10.1242	10.8049	11.4543	12.5358	11.6805	sp|O95562|SFT2B_HUMAN
sp|O95678|K2C75_HUMAN	18.8526	18.5661	17.9288	18.0588	18.3273	17.7258	18.8302	18.2147	19.1593	18.9191	18.5917	18.8728	18.5284	17.5123	18.0535	17.9752	18.9365	18.7735	17.6947	18.5959	sp|O95678|K2C75_HUMAN
sp|O95714|HERC2_HUMAN	7.64376	8.66762	10.6745	7.83259	7.55956	7.84158	NA	8.37105	9.96975	9.16307	9.54458	9.2484	9.46283	9.229	9.26684	9.30303	7.52283	NA	8.5061	9.41465	sp|O95714|HERC2_HUMAN
sp|O95721|SNP29_HUMAN	13.5192	13.5133	14.1716	13.8342	13.7311	12.9638	13.794	13.1987	12.6032	14.0518	13.4828	12.6816	13.9034	13.0806	13.8446	14.1195	13.4604	13.4107	13.6558	13.6445	sp|O95721|SNP29_HUMAN
sp|O95782|AP2A1_HUMAN	12.3122	9.21475	11.3579	12.8527	10.9268	11.1986	9.12874	13.2525	14.8884	12.7635	14.3053	11.0035	12.9155	12.4837	14.3522	12.993	12.3509	14.1936	13.3313	11.2399	sp|O95782|AP2A1_HUMAN
sp|O95807|TM50A_HUMAN	14.6247	14.7886	14.3308	14.9198	14.5734	14.9884	14.4711	14.8774	15.1795	13.3246	14.9844	15.3011	14.687	15.1847	14.9188	14.6224	14.7365	14.851	14.8765	14.769	sp|O95807|TM50A_HUMAN
sp|O95831|AIFM1_HUMAN	NA	NA	13.7877	NA	NA	NA	NA	13.5666	13.8652	NA	NA	NA	NA	NA	14.4868	NA	14.3556	NA	NA	NA	sp|O95831|AIFM1_HUMAN
sp|O95833|CLIC3_HUMAN	13.9467	13.721	13.8253	13.4947	13.6268	NA	14.0773	16.7687	15.1875	13.8727	NA	13.0654	13.5973	13.5845	13.7434	14.947	13.7867	14.8146	13.438	13.5095	sp|O95833|CLIC3_HUMAN
sp|O95865|DDAH2_HUMAN	11.9799	NA	14.199	13.6665	12.3101	13.572	NA	13.6795	15.9279	16.0324	15.0739	13.249	15.0975	13.6101	16.1488	15.9577	13.076	13.502	14.202	15.1346	sp|O95865|DDAH2_HUMAN
sp|O95867|LY66C_HUMAN	16.3567	15.5985	15.2479	16.4359	16.0734	15.5936	15.9494	17.1932	17.3585	17.3327	16.2942	15.002	16.2785	16.8723	16.9783	16.7275	15.9307	15.3864	16.2909	16.2802	sp|O95867|LY66C_HUMAN
sp|O95969|SG1D2_HUMAN	10.8304	11.9686	11.157	11.9864	8.16575	9.12687	11.8499	6.7193	8.62251	7.27435	7.88199	6.54877	7.20253	7.81087	7.26611	7.20964	4.81443	6.91389	8.6757	6.76278	sp|O95969|SG1D2_HUMAN
sp|O96000|NDUBA_HUMAN	12.0117	12.2644	13.8738	12.8367	12.6981	13.4866	12.522	12.0511	13.2668	11.6735	11.3636	12.5079	12.7291	13.5164	13.448	12.9022	12.2559	11.4581	12.964	12.6029	sp|O96000|NDUBA_HUMAN
sp|O96008|TOM40_HUMAN	NA	10.2554	11.7318	9.70574	9.76914	9.49358	10.362	9.82149	11.5373	NA	9.75544	8.6974	9.97981	10.5353	10.8686	9.36231	NA	9.35163	NA	8.69319	sp|O96008|TOM40_HUMAN
sp|P00167|CYB5_HUMAN	NA	8.65795	9.52436	10.0761	NA	9.61566	11.2071	11.8029	12.0609	11.7138	NA	NA	10.1179	NA	8.28585	NA	NA	NA	NA	NA	sp|P00167|CYB5_HUMAN
sp|P00338|LDHA_HUMAN	14.9173	15.2399	18.6515	17.3091	16.6676	17.2063	16.3797	16.5777	16.7466	14.355	15.3875	15.9227	14.3584	14.9902	17.3891	15.9079	14.1529	14.9018	13.9865	16.1772	sp|P00338|LDHA_HUMAN
sp|P00352|AL1A1_HUMAN	NA	NA	NA	NA	NA	12.7681	NA	NA	13.2484	NA	NA	NA	NA	NA	12.9655	12.9544	NA	12.756	10.9966	14.3424	sp|P00352|AL1A1_HUMAN
sp|P00367|DHE3_HUMAN	NA	NA	12.8446	NA	NA	NA	NA	13.5501	13.3684	NA	NA	12.596	12.3541	14.1941	NA	12.0363	11.9053	NA	NA	11.8725	sp|P00367|DHE3_HUMAN
sp|P00387|NB5R3_HUMAN	11.9097	12.1251	11.6847	12.1802	NA	12.4805	13.0469	14.6624	14.2189	12.2846	12.2831	NA	NA	11.6626	11.4849	12.556	12.3693	12.2253	10.6375	12.4514	sp|P00387|NB5R3_HUMAN
sp|P00390|GSHR_HUMAN	13.2409	13.4987	14.4003	14.4465	14.0628	14.6581	14.8834	13.6676	15.6812	14.4855	13.7965	15.1531	15.0124	14.6099	15.1104	15.0281	14.302	14.6444	14.7983	12.9633	sp|P00390|GSHR_HUMAN
sp|P00403|COX2_HUMAN	11.3505	10.3053	12.6808	12.2298	12.2489	13.7096	NA	13.6315	14.0263	11.5132	11.8347	11.5097	12.7811	12.6911	13.3266	12.814	11.4818	12.293	11.9313	12.8407	sp|P00403|COX2_HUMAN
sp|P00441|SODC_HUMAN	17.2177	15.4264	16.9136	17.7431	17.7629	18.0773	17.2881	17.8832	18.3389	18.4977	18.1577	18.1765	18.2471	18.063	17.6225	17.9084	17.4219	16.785	17.644	18.0318	sp|P00441|SODC_HUMAN
sp|P00450|CERU_HUMAN	13.2899	NA	NA	13.354	NA	12.9654	13.1793	13.5248	13.3301	NA	NA	NA	NA	NA	NA	12.6636	NA	NA	NA	NA	sp|P00450|CERU_HUMAN
sp|P00491|PNPH_HUMAN	17.0652	16.3237	18.3915	18.7516	17.8612	18.1087	16.7517	18.0857	18.8572	18.988	17.7333	17.6414	18.0184	18.4204	18.8091	18.0822	18.3182	18.0373	18.5529	18.386	sp|P00491|PNPH_HUMAN
sp|P00492|HPRT_HUMAN	13.2924	11.8543	14.9531	14.7943	13.6905	15.0715	13.6014	16.2552	16.327	15.8087	15.4814	14.6126	16.0381	15.9273	16.215	16.2752	15.6146	15.724	15.8393	15.9391	sp|P00492|HPRT_HUMAN
sp|P00505|AATM_HUMAN	NA	NA	14.4621	12.7322	12.4398	13.0403	NA	14.0237	15.8407	12.0977	12.2659	11.7261	12.7001	11.953	13.0197	14.7866	NA	11.5196	12.5224	13.5521	sp|P00505|AATM_HUMAN
sp|P00533|EGFR_HUMAN	13.3197	13.3853	13.2823	13.9225	13.0161	13.9921	13.8287	14.1778	13.9486	13.0861	14.0435	14.1018	13.4271	14.092	13.8223	14.0506	13.6563	11.8004	13.9153	14.3699	sp|P00533|EGFR_HUMAN
sp|P00558|PGK1_HUMAN	11.4847	11.046	12.5933	11.2444	15.6533	11.4016	11.8701	16.7066	13.1372	15.5917	12.9531	12.6064	10.9623	11.1185	14.5265	13.1319	11.3615	14.6739	13.7841	11.615	sp|P00558|PGK1_HUMAN
sp|P00734|THRB_HUMAN	NA	NA	NA	10.6498	NA	11.1226	8.60035	11.3008	10.9844	NA	NA	NA	NA	NA	NA	9.63383	NA	NA	NA	NA	sp|P00734|THRB_HUMAN
sp|P00738|HPT_HUMAN	16.09	NA	11.809	15.475	NA	16.3573	16.4077	17.2983	16.9163	14.6792	11.8186	12.4811	NA	NA	12.4444	15.9548	11.8766	13.8039	11.6752	11.8194	sp|P00738|HPT_HUMAN
sp|P00747|PLMN_HUMAN	11.1574	8.90364	NA	10.9025	8.35959	12.1219	NA	12.3025	12.1632	NA	9.72793	NA	10.6098	10.5101	9.81558	9.91167	NA	9.70301	NA	9.85268	sp|P00747|PLMN_HUMAN
sp|P00813|ADA_HUMAN	8.97292	9.15066	12.3901	11.1984	12.1751	11.919	9.96264	13.1548	12.7715	12.7952	11.3374	11.4859	11.8493	12.4807	12.0627	12.1084	11.805	11.5956	11.7899	12.7046	sp|P00813|ADA_HUMAN
sp|P00915|CAH1_HUMAN	11.0632	NA	NA	NA	NA	15.6059	15.5747	12.7928	14.6674	12.3175	NA	NA	NA	NA	NA	NA	NA	NA	NA	NA	sp|P00915|CAH1_HUMAN
sp|P00918|CAH2_HUMAN	12.6215	11.1385	12.1511	NA	NA	15.6111	14.4788	14.2651	14.4933	13.1464	11.0085	NA	11.5508	11.89	11.1105	11.1904	11.7609	11.6722	12.5274	12.9128	sp|P00918|CAH2_HUMAN
sp|P01008|ANT3_HUMAN	12.2172	9.82013	10.4717	12.857	9.31451	12.5588	11.1495	13.7725	12.8898	10.06	9.99082	10.0138	10.4032	10.4045	10.7001	12.3466	9.74113	9.33602	10.0709	9.52065	sp|P01008|ANT3_HUMAN
sp|P01009|A1AT_HUMAN	16.8943	14.9964	15.2378	16.7026	14.8365	16.8541	17.0614	17.9081	16.7666	16.2461	16.4839	15.6045	15.7566	16.0315	15.9682	16.6283	16.0037	14.9888	15.1048	16.1444	sp|P01009|A1AT_HUMAN
sp|P01011|AACT_HUMAN	15.3534	15.2388	14.2748	14.9855	14.4669	14.6	14.3786	14.6681	14.7878	14.3314	14.4419	14.6908	15.301	13.013	12.6721	13.9581	13.8048	13.2389	13.0188	13.3885	sp|P01011|AACT_HUMAN
sp|P01019|ANGT_HUMAN	10.9705	NA	NA	10.1259	NA	11.4474	12.156	12.2329	11.2718	10.0821	NA	NA	NA	NA	NA	9.9738	NA	NA	NA	NA	sp|P01019|ANGT_HUMAN
sp|P01023|A2MG_HUMAN	12.4419	NA	NA	13.8262	NA	13.7122	12.1276	13.9737	13.162	11.0036	NA	9.50978	NA	NA	NA	12.5662	NA	NA	NA	9.71272	sp|P01023|A2MG_HUMAN
sp|P01024|CO3_HUMAN	13.8693	NA	NA	14.7093	NA	16.0386	13.5176	16.6167	14.61	12.3302	NA	NA	12.0684	NA	11.989	14.4001	NA	NA	NA	NA	sp|P01024|CO3_HUMAN
sp|P01034|CYTC_HUMAN	14.3221	13.1136	13.0658	14.3247	13.0773	12.4264	14.4242	13.8692	14.0643	13.5317	12.9252	12.0816	12.6173	12.7112	11.9962	13.4178	12.6524	13.9575	12.9394	12.03	sp|P01034|CYTC_HUMAN
sp|P01036|CYTS_HUMAN	12.8642	11.0358	NA	12.9335	12.1408	NA	11.8326	NA	13.1725	13.408	13.2824	11.5665	NA	10.7582	NA	11.1987	NA	12.1758	10.2968	11.412	sp|P01036|CYTS_HUMAN
sp|P01037|CYTN_HUMAN	15.3991	13.9809	11.9021	16.3596	14.2229	12.4926	14.493	13.0172	15.1753	15.679	16.7818	12.3073	12.9659	12.7627	13.0574	14.0075	NA	14.1625	13.4416	14.5486	sp|P01037|CYTN_HUMAN
sp|P01040|CYTA_HUMAN	21.7699	22.0956	22.2489	22.2095	21.1303	22.1472	21.3775	20.9658	20.6765	21.6453	21.5386	21.3648	20.9091	20.3963	21.7638	20.8838	20.4573	19.9769	20.5323	20.6391	sp|P01040|CYTA_HUMAN
sp|P01042|KNG1_HUMAN	11.4688	NA	NA	11.4638	NA	11.5971	11.6642	12.6192	11.9754	NA	NA	NA	NA	NA	NA	11.377	NA	NA	NA	NA	sp|P01042|KNG1_HUMAN
sp|P01116|RASK_HUMAN	NA	NA	8.48438	9.45202	NA	NA	9.77479	12.112	9.34553	10.9962	9.95516	11.8552	10.0118	10.7635	NA	12.5837	8.93089	NA	NA	NA	sp|P01116|RASK_HUMAN
sp|P01583|IL1A_HUMAN	13.8932	13.9308	12.4985	9.91212	13.8262	12.7689	11.8817	13.2427	NA	12.6167	12.268	11.9218	12.8137	NA	12.7614	13.6114	14.2294	10.7513	13.2836	13.0051	sp|P01583|IL1A_HUMAN
sp|P01591|IGJ_HUMAN	14.7665	11.6372	11.2168	12.9986	13.2875	11.6747	14.1277	12.991	11.7679	13.6776	11.2861	NA	13.4474	10.8969	14.0182	15.2527	13.2861	13.8045	12.0083	13.4348	sp|P01591|IGJ_HUMAN
sp|P01780|HV307_HUMAN	13.958	11.6238	11.7725	13.5978	12.4151	13.6556	13.5172	14.9429	13.3702	13.8661	12.3501	12.6696	13.5167	12.8832	13.8344	15.0602	13.1471	13.829	12.6781	13.4944	sp|P01780|HV307_HUMAN
sp|P01833|PIGR_HUMAN	15.2558	13.9599	12.4383	14.0705	14.2665	13.7329	15.0941	13.004	11.3417	15.6551	12.1221	10.6644	11.6702	NA	13.3854	16.5593	14.912	15.8765	13.1457	14.0347	sp|P01833|PIGR_HUMAN
sp|P01834|IGKC_HUMAN	16.313	13.1125	13.4777	16.319	14.4979	15.6207	18.0109	18.5678	15.1028	16.2996	14.9266	14.361	15.7649	14.3784	15.3969	17.7671	15.6536	15.2472	13.8613	15.8284	sp|P01834|IGKC_HUMAN
sp|P01857|IGHG1_HUMAN	19.498	18.1821	18.7376	19.8311	18.623	19.6153	19.9917	21.3648	19.6195	19.3418	19.0359	18.8847	19.4678	19.1703	19.2162	20.2455	19.8311	19.4774	19.0218	19.7637	sp|P01857|IGHG1_HUMAN;sp|P0DOX5|IGG1_HUMAN
sp|P01859|IGHG2_HUMAN	17.8754	15.2449	15.5136	18.0432	15.9299	17.6691	17.391	18.8086	17.7826	16.7197	16.8753	15.5038	16.5171	16.3547	16.3933	17.6073	15.6139	16.9613	15.7815	17.0121	sp|P01859|IGHG2_HUMAN
sp|P01860|IGHG3_HUMAN	12.0772	NA	NA	NA	NA	10.9419	11.9311	11.2102	NA	NA	NA	NA	11.1143	NA	NA	NA	11.7957	NA	NA	10.3918	sp|P01860|IGHG3_HUMAN
sp|P01861|IGHG4_HUMAN	14.204	11.1993	NA	16.1283	NA	11.7782	14.3584	16.5683	12.3513	12.3018	11.4639	NA	NA	12.3495	NA	12.7644	NA	NA	11.0416	12.2132	sp|P01861|IGHG4_HUMAN
sp|P01876|IGHA1_HUMAN	19.0982	17.1515	16.3952	18.2463	17.2979	18.4197	18.3605	18.3872	17.4613	18.2427	16.4758	16.5857	18.0098	16.3391	18.7584	20.2656	18.5601	18.6217	17.2869	18.0336	sp|P01876|IGHA1_HUMAN
sp|P01877|IGHA2_HUMAN	18.5164	16.1455	15.6871	17.6569	17.0417	17.4766	17.5446	18.0335	17.1725	18.0311	16.2031	15.8406	17.5639	15.8091	18.2856	19.9223	17.76	18.5902	17.0661	17.7194	sp|P01877|IGHA2_HUMAN;sp|P0DOX2|IGA2_HUMAN
sp|P01903|DRA_HUMAN	11.9759	10.4783	11.9468	10.275	11.0717	12.358	NA	13.1447	9.3804	10.2786	12.0593	11.4585	12.3786	10.2217	12.4668	10.4038	12.5336	10.9075	10.7399	12.3849	sp|P01903|DRA_HUMAN
sp|P01911|2B1F_HUMAN	12.2507	NA	11.2172	NA	NA	NA	NA	NA	NA	NA	NA	NA	10.6124	NA	11.251	NA	10.1202	NA	10.1945	NA	sp|P01911|2B1F_HUMAN;sp|P01912|2B13_HUMAN;sp|Q5Y7A7|2B1D_HUMAN;sp|Q9GIY3|2B1E_HUMAN
sp|P02042|HBD_HUMAN	10.8257	9.11987	9.99039	10.7954	9.47486	18.2403	14.4697	13.5581	16.6532	9.58606	8.3583	10.4935	8.43336	NA	NA	9.52007	9.65946	NA	NA	10.3322	sp|P02042|HBD_HUMAN
sp|P02511|CRYAB_HUMAN	14.079	11.5289	13.7964	12.6969	14.3264	13.6454	13.4974	14.7507	14.627	13.813	12.9159	12.5792	13.3557	12.9979	13.5971	13.2047	12.6298	13.1893	11.9097	13.9358	sp|P02511|CRYAB_HUMAN
sp|P02533|K1C14_HUMAN	28.1514	27.9795	27.7442	28.0263	28.0012	28.0604	28.3568	27.7338	27.913	27.7115	28.1234	27.9796	27.5572	27.9348	28.1005	28.0496	28.2454	23.6092	25.6617	28.0665	sp|P02533|K1C14_HUMAN
sp|P02538|K2C6A_HUMAN	28.6282	28.3696	28.4278	28.8499	28.6505	28.5123	28.5608	28.0791	28.5312	27.9667	28.8918	28.3554	28.0639	28.2172	28.017	26.8938	28.3595	28.7918	27.1262	27.9038	sp|P02538|K2C6A_HUMAN
sp|P02545|LMNA_HUMAN	13.7603	12.1033	14.9556	13.659	14.5571	15.554	13.2396	16.8538	15.0973	13.7143	11.4622	11.0127	11.7784	11.7411	13.462	13.7701	13.0197	14.8541	13.5083	13.711	sp|P02545|LMNA_HUMAN
sp|P02647|APOA1_HUMAN	16.8283	13.7557	13.2588	17.5432	13.9591	17.3415	19.3689	17.4868	17.0343	17.0068	14.3076	14.255	14.3719	13.9169	13.1751	16.2654	13.3489	13.1198	12.7005	13.7785	sp|P02647|APOA1_HUMAN
sp|P02649|APOE_HUMAN	15.5143	14.8394	13.3846	14.9202	15.1209	15.4226	14.6464	15.0616	14.7883	15.358	13.742	15.3397	15.2595	15.6916	15.3975	15.1667	14.9979	14.036	14.636	13.9551	sp|P02649|APOE_HUMAN
sp|P02652|APOA2_HUMAN	13.2664	NA	NA	13.6175	NA	14.0786	15.8907	14.7347	14.1203	13.8807	NA	NA	10.5185	10.047	NA	13.1958	10.87	NA	NA	NA	sp|P02652|APOA2_HUMAN
sp|P02654|APOC1_HUMAN	9.51555	NA	NA	10.4145	NA	NA	10.9024	10.1423	10.1909	NA	NA	NA	9.43412	NA	NA	NA	NA	NA	NA	NA	sp|P02654|APOC1_HUMAN
sp|P02671|FIBA_HUMAN	12.8305	NA	NA	14.3965	NA	16.8729	14.2386	15.7608	14.4216	11.6423	11.0028	NA	10.7499	NA	10.6669	13.3666	NA	NA	10.5493	11.8838	sp|P02671|FIBA_HUMAN
sp|P02675|FIBB_HUMAN	12.9204	10.6685	12.5516	14.7598	11.1147	16.6225	13.901	15.7084	14.579	13.1647	11.8993	10.9221	12.0994	13.4115	11.2982	13.8962	12.0648	12.5525	11.2471	12.4205	sp|P02675|FIBB_HUMAN
sp|P02679|FIBG_HUMAN	11.855	9.64151	9.35171	14.9687	10.2467	16.6808	13.4799	15.3759	13.9458	11.7209	11.1644	10.8791	10.8507	9.00229	10.6405	12.6686	11.0507	10.8168	10.2852	11.057	sp|P02679|FIBG_HUMAN
sp|P02743|SAMP_HUMAN	12.4858	NA	NA	11.0035	NA	12.1489	11.8635	12.7621	11.2579	NA	NA	NA	NA	NA	11.301	NA	NA	NA	NA	NA	sp|P02743|SAMP_HUMAN
sp|P02749|APOH_HUMAN	11.7014	NA	NA	NA	NA	NA	13.2674	13.9079	12.99	NA	8.28055	NA	NA	NA	NA	11.0809	13.6267	NA	NA	9.00178	sp|P02749|APOH_HUMAN
sp|P02750|A2GL_HUMAN	NA	NA	NA	NA	11.4908	NA	12.0103	12.639	NA	NA	NA	NA	NA	NA	NA	10.962	NA	10.4256	NA	NA	sp|P02750|A2GL_HUMAN
sp|P02751|FINC_HUMAN	10.6285	NA	NA	11.0449	NA	11.357	NA	12.2303	11.4795	7.50605	NA	NA	NA	NA	NA	10.444	NA	NA	NA	NA	sp|P02751|FINC_HUMAN
sp|P02763|A1AG1_HUMAN	15.0732	11.8338	12.493	14.2716	10.9723	12.9907	15.6804	15.8965	15.3353	13.4381	13.049	11.2377	11.0647	12.9187	10.5276	14.2585	11.9355	11.3967	12.6536	12.4659	sp|P02763|A1AG1_HUMAN
sp|P02766|TTHY_HUMAN	13.6262	11.8266	10.1461	13.801	11.9046	13.5885	14.8361	15.0455	14.1744	13.5039	12.8366	11.8191	12.7302	NA	12.4324	14.0097	11.9031	12.2209	NA	13.9984	sp|P02766|TTHY_HUMAN
sp|P02768|ALBU_HUMAN	20.2696	17.7957	17.7372	21.6245	17.54	18.9326	19.8367	21.4298	20.1966	18.8137	18.5194	17.8857	18.3839	18.1433	18.5154	20.1735	18.3636	18.0551	17.8321	18.159	sp|P02768|ALBU_HUMAN
sp|P02774|VTDB_HUMAN	13.977	NA	NA	13.8041	NA	13.0786	13.5212	14.1926	13.2005	12.036	NA	NA	NA	11.0586	NA	NA	NA	NA	NA	NA	sp|P02774|VTDB_HUMAN
sp|P02787|TRFE_HUMAN	14.995	12.2491	12.6248	16.5689	NA	13.2042	14.9053	17.4669	16.404	14.0987	13.1194	NA	12.4654	12.3196	12.946	15.9249	13.6424	12.8657	12.8456	13.0315	sp|P02787|TRFE_HUMAN
sp|P02788|TRFL_HUMAN	15.9136	14.3478	12.9591	14.7556	13.6915	13.1059	14.2793	15.3669	14.0232	14.2047	12.514	12.6351	14.0188	13.7292	14.5687	16.5418	14.1571	15.7609	13.8148	14.3881	sp|P02788|TRFL_HUMAN
sp|P02790|HEMO_HUMAN	14.5692	10.7798	11.0799	13.0304	11.2804	12.1504	14.5082	14.8624	14.8144	12.2433	NA	10.4344	NA	NA	NA	13.5761	11.6161	NA	NA	11.0707	sp|P02790|HEMO_HUMAN
sp|P02810|PRPC_HUMAN	18.4432	16.445	13.9679	18.1726	18.3752	14.696	17.5145	15.875	18.0564	18.2251	18.5056	14.126	15.5778	14.5771	16.3643	16.5772	15.4164	16.8784	16.2921	17.5094	sp|P02810|PRPC_HUMAN
sp|P04003|C4BPA_HUMAN	12.3026	NA	NA	10.9964	NA	14.9477	10.0719	13.2769	12.7549	NA	NA	NA	NA	NA	NA	10.7462	NA	NA	NA	NA	sp|P04003|C4BPA_HUMAN
sp|P04004|VTNC_HUMAN	12.8992	11.4384	NA	13.2663	11.0383	13.531	13.2603	14.2749	13.2702	12.1031	12.4981	11.4755	12.1201	12.929	13.0515	13.3294	12.7338	12.6461	12.0161	12.5829	sp|P04004|VTNC_HUMAN
sp|P04040|CATA_HUMAN	21.6581	22.4939	22.366	22.1469	21.9293	23.0149	22.4535	22.1602	22.3791	22.646	22.7046	22.8091	22.7201	22.4869	22.6496	22.5429	22.4359	21.2016	22.5813	22.3786	sp|P04040|CATA_HUMAN
sp|P04062|GLCM_HUMAN	17.6876	18.1339	18.4269	18.4521	18.3322	17.5995	18.0216	19.2214	20.006	19.3286	19.2639	18.7747	18.6416	19.2318	19.1361	18.5636	18.4821	18.7957	18.7967	18.8957	sp|P04062|GLCM_HUMAN
sp|P04066|FUCO_HUMAN	16.6939	17.371	17.354	16.5326	16.6091	17.0003	17.0879	17.8986	16.2475	16.3662	16.6855	15.8932	17.0428	16.9851	16.4691	16.9647	16.9265	16.2206	16.6471	16.5757	sp|P04066|FUCO_HUMAN
sp|P04075|ALDOA_HUMAN	16.7544	17.0364	18.4047	18.2948	17.3466	18.1848	17.5059	18.8038	18.5411	17.7063	17.6331	17.9605	17.7062	17.7222	18.5769	17.895	17.7963	18.0128	17.9285	18.0943	sp|P04075|ALDOA_HUMAN
sp|P04080|CYTB_HUMAN	13.8257	13.4862	13.8063	13.736	13.746	14.4182	13.9857	15.4453	15.5946	15.5741	14.7115	14.1358	14.5604	14.6208	14.7311	14.9538	14.7793	14.9289	14.9048	15.1261	sp|P04080|CYTB_HUMAN
sp|P04083|ANXA1_HUMAN	16.101	14.9285	14.9429	15.2464	14.0413	15.5754	16.191	16.4308	15.4912	14.7344	14.756	13.8102	15.4263	14.4449	14.8533	15.3672	14.9746	15.2425	14.6567	14.5057	sp|P04083|ANXA1_HUMAN
sp|P04114|APOB_HUMAN	NA	NA	NA	12.1926	NA	NA	NA	12.5895	12.2679	10.7695	NA	NA	12.0681	10.7019	NA	11.1522	NA	NA	12.3393	NA	sp|P04114|APOB_HUMAN
sp|P04179|SODM_HUMAN	13.7862	12.5234	15.2758	14.7698	16.4462	15.9075	13.4398	16.7447	16.8628	15.6993	14.9035	15.8268	15.7693	16.6079	15.8457	15.8684	15.7848	14.1802	15.9257	16.2366	sp|P04179|SODM_HUMAN
sp|P04217|A1BG_HUMAN	12.2176	9.12789	NA	11.7388	NA	13.8683	14.1905	13.8715	10.8951	11.2553	NA	NA	NA	11.3215	NA	10.5896	8.28919	NA	NA	NA	sp|P04217|A1BG_HUMAN
sp|P04259|K2C6B_HUMAN	17.3269	15.5581	16.9006	16.3585	16.7489	17.1843	17.3794	17.6239	17.5824	17.8658	16.9183	16.8451	16.8851	16.2298	17.4776	17.7557	16.5696	20.2398	17.3971	17.2167	sp|P04259|K2C6B_HUMAN
sp|P04264|K2C1_HUMAN	30.1975	30.2074	30.0514	29.8692	30.1965	30.1819	30.1211	30.2012	29.8092	29.4995	29.8034	30.0579	30.1722	29.8461	30.0433	30.2969	30.1615	29.6817	30.2072	29.9712	sp|P04264|K2C1_HUMAN
sp|P04279|SEMG1_HUMAN	NA	NA	NA	NA	NA	NA	NA	NA	NA	NA	NA	NA	NA	NA	NA	NA	NA	13.6635	NA	14.1134	sp|P04279|SEMG1_HUMAN
sp|P04406|G3P_HUMAN	20.5243	20.2003	23.1125	23.3009	21.4502	22.7297	20.5521	23.1058	24.5831	23.6021	23.4038	23.1236	23.5218	23.7347	23.9531	23.7619	23.8081	22.8315	23.7378	23.0239	sp|P04406|G3P_HUMAN
sp|P04424|ARLY_HUMAN	NA	NA	13.2403	7.94214	NA	9.58668	10.8707	9.64143	12.7138	9.87758	13.323	NA	10.878	NA	9.97964	12.1459	10.9756	11.4997	9.43063	9.84115	sp|P04424|ARLY_HUMAN
sp|P04439|1A03_HUMAN	NA	12.1243	11.7649	NA	NA	NA	NA	NA	11.996	NA	11.0984	NA	12.4106	11.2821	10.5003	NA	NA	NA	NA	NA	sp|P04439|1A03_HUMAN;sp|P05534|1A24_HUMAN;sp|P13746|1A11_HUMAN;sp|P30443|1A01_HUMAN;sp|P30455|1A36_HUMAN
sp|P04745|AMY1_HUMAN	14.7239	12.0768	NA	15.462	11.7952	NA	12.8908	10.8466	13.1646	12.0228	12.5862	NA	NA	NA	NA	10.5283	NA	11.1587	10.2223	12.1898	sp|P04745|AMY1_HUMAN;sp|P19961|AMY2B_HUMAN
sp|P04792|HSPB1_HUMAN	18.0992	17.0202	17.5788	17.5935	17.5526	17.6193	18.2833	20.8764	19.2522	18.5018	17.4383	17.1014	18.0702	17.6835	17.634	18.2481	17.6802	18.3356	17.4717	18.5831	sp|P04792|HSPB1_HUMAN
sp|P04843|RPN1_HUMAN	15.4651	15.8889	16.03	16.3789	16.0217	16.1981	16.3243	16.1209	17.5839	15.8748	16.5652	16.1683	16.1222	16.7652	17.1784	16.9967	16.0905	16.2814	15.9293	16.4726	sp|P04843|RPN1_HUMAN
sp|P04844|RPN2_HUMAN	14.5637	14.5976	13.7364	14.7271	13.9768	13.9619	15.1427	14.8437	14.9216	13.077	15.2475	14.5174	14.8234	15.1215	14.5703	15.2318	14.8077	14.4123	14.2866	15.3732	sp|P04844|RPN2_HUMAN
sp|P04908|H2A1B_HUMAN	14.5406	14.0106	NA	NA	13.2206	14.1055	14.0167	17.1991	14.823	NA	NA	NA	13.9367	13.2369	14.7688	14.867	14.1324	14.6942	13.4581	14.2239	sp|P04908|H2A1B_HUMAN;sp|P0C0S5|H2AZ_HUMAN;sp|P0C0S8|H2A1_HUMAN;sp|P16104|H2AX_HUMAN;sp|P20671|H2A1D_HUMAN;sp|Q16777|H2A2C_HUMAN;sp|Q6FI13|H2A2A_HUMAN;sp|Q71UI9|H2AV_HUMAN;sp|Q7L7L0|H2A3_HUMAN;sp|Q93077|H2A1C_HUMAN;sp|Q96KK5|H2A1H_HUMAN;sp|Q96QV6|H2A1A_HUMAN;sp|Q99878|H2A1J_HUMAN;sp|Q9BTM1|H2AJ_HUMAN
sp|P05089|ARGI1_HUMAN	20.5956	20.6946	22.5533	23.145	21.8335	22.8083	21.1088	22.4012	23.8748	24.0569	22.0737	22.2882	23.0357	23.3173	23.4319	22.1819	22.9181	22.4146	23.5756	22.9422	sp|P05089|ARGI1_HUMAN
sp|P05090|APOD_HUMAN	17.7818	18.1824	18.4772	17.0653	17.7971	18.525	19.19	18.082	17.5476	17.9483	17.851	18.5001	16.9791	18.2064	18.0058	17.5635	18.1322	17.0209	16.3867	17.9386	sp|P05090|APOD_HUMAN
sp|P05091|ALDH2_HUMAN	10.761	NA	8.15854	10.105	8.91528	9.97976	NA	NA	11.807	NA	9.02537	9.11675	9.34855	8.60254	11.2228	11.5388	NA	10.7319	10.7363	12.002	sp|P05091|ALDH2_HUMAN
sp|P05109|S10A8_HUMAN	17.6406	17.388	16.8249	17.2684	17.8984	17.2732	17.3766	19.1957	17.1614	17.1054	16.6565	16.1858	16.8779	17.038	17.1904	17.6116	18.3655	20.422	18.2091	17.7675	sp|P05109|S10A8_HUMAN
sp|P05120|PAI2_HUMAN	16.9625	16.4755	16.9562	16.6681	16.3733	17.3728	16.3065	17.6275	17.092	17.3882	17.4767	16.9472	16.9344	17.1859	17.4531	17.061	16.6448	16.9797	16.9083	17.2386	sp|P05120|PAI2_HUMAN
sp|P05141|ADT2_HUMAN	11.8572	12.4303	12.1005	13.7555	13.5983	14.0688	11.22	14.4161	15.0101	11.1322	12.6381	13.0636	13.9288	14.32	14.4571	12.4212	13.2781	12.5315	13.5867	13.9603	sp|P05141|ADT2_HUMAN
sp|P05155|IC1_HUMAN	11.4069	NA	NA	11.1427	NA	NA	NA	NA	NA	NA	NA	NA	NA	NA	NA	NA	NA	NA	NA	NA	sp|P05155|IC1_HUMAN
sp|P05164|PERM_HUMAN	NA	NA	NA	10.4911	NA	NA	NA	14.2048	NA	NA	NA	NA	NA	NA	NA	13.1973	NA	NA	11.379	13.1581	sp|P05164|PERM_HUMAN
sp|P05166|PCCB_HUMAN	NA	NA	12.4603	NA	NA	11.3372	NA	NA	12.101	NA	NA	NA	11.6105	11.472	12.9863	10.8892	10.9151	NA	NA	11.823	sp|P05166|PCCB_HUMAN
sp|P05387|RLA2_HUMAN	10.8507	NA	13.8723	14.2017	12.8952	NA	13.4115	15.1998	16.4565	12.5629	13.54	13.4754	12.2952	14.2127	14.9318	14.2541	NA	13.0647	NA	13.6796	sp|P05387|RLA2_HUMAN
sp|P05388|RLA0_HUMAN	NA	NA	NA	NA	NA	NA	NA	13.3901	12.4425	NA	NA	NA	NA	NA	NA	NA	NA	10.317	NA	NA	sp|P05388|RLA0_HUMAN
sp|P05452|TETN_HUMAN	10.7636	NA	NA	12.1805	NA	NA	13.1035	12.4433	NA	10.6894	10.5774	NA	NA	NA	NA	NA	10.7677	NA	NA	NA	sp|P05452|TETN_HUMAN
sp|P05783|K1C18_HUMAN	12.2534	11.6553	13.3949	12.0639	12.9601	14.0972	12.4314	12.268	12.2192	12.8209	11.9369	13.286	12.0897	12.4007	13.0736	13.3112	15.2315	13.0017	12.1156	13.2074	sp|P05783|K1C18_HUMAN
sp|P05787|K2C8_HUMAN	16.3284	16.0579	16.0655	15.6789	15.9434	15.6349	15.8494	15.8654	15.467	15.8468	15.9614	15.9364	15.9171	15.6813	15.5386	15.5711	15.8388	15.746	14.9271	15.2788	sp|P05787|K2C8_HUMAN
sp|P05976|MYL1_HUMAN	NA	NA	NA	NA	NA	11.2445	NA	13.4912	11.9337	NA	11.4554	NA	NA	NA	NA	11.8233	NA	11.6304	NA	NA	sp|P05976|MYL1_HUMAN;sp|P08590|MYL3_HUMAN
sp|P06132|DCUP_HUMAN	NA	12.0168	12.8877	13.3033	12.9858	13.1471	NA	13.0052	14.2525	13.937	13.4749	13.0114	13.6432	13.5854	13.5025	13.6855	12.9683	13.468	13.3189	12.6602	sp|P06132|DCUP_HUMAN
sp|P06280|AGAL_HUMAN	15.5169	15.4065	14.7737	15.6943	14.7619	15.6787	14.6551	16.6689	16.1526	16.5019	15.9818	14.8782	15.9585	15.6486	15.4705	15.6083	16.2847	15.7773	16.182	15.5595	sp|P06280|AGAL_HUMAN
sp|P06312|KV401_HUMAN	10.5276	8.61634	9.85804	11.1345	9.59178	10.2577	11.3355	11.6453	10.4036	10.3501	10.7011	9.66767	10.0344	10.3322	10.734	11.808	10.1138	10.1583	9.88053	10.6687	sp|P06312|KV401_HUMAN
sp|P06396|GELS_HUMAN	17.3074	16.9154	16.4276	17.6251	16.8286	16.7005	17.0995	18.2198	18.0837	17.606	17.5031	16.5328	17.2988	17.6479	16.5742	17.4827	16.5846	16.943	16.995	16.8611	sp|P06396|GELS_HUMAN
sp|P06576|ATPB_HUMAN	10.1594	9.96991	12.3085	9.8863	12.2699	11.7521	9.9936	15.6402	13.7316	9.80805	12.0497	8.79399	12.312	12.5952	9.93372	10.4534	9.77128	12.9814	12.4429	13.0003	sp|P06576|ATPB_HUMAN
sp|P06702|S10A9_HUMAN	18.8383	18.8757	18.4664	18.9285	19.1322	18.8287	18.6922	20.5971	18.1789	18.7704	17.6682	17.3844	18.1445	18.1753	18.048	19.0543	19.4783	21.7931	19.6358	19.3714	sp|P06702|S10A9_HUMAN
sp|P06727|APOA4_HUMAN	12.76	NA	NA	12.9584	NA	12.4858	14.1366	13.4877	12.8116	12.1328	NA	NA	NA	NA	NA	11.8517	NA	NA	NA	NA	sp|P06727|APOA4_HUMAN
sp|P06731|CEAM5_HUMAN	15.4575	13.3504	13.2083	14.4176	13.3461	13.6657	14.9233	14.9611	13.8076	12.9456	13.3181	13.0028	15.3373	14.2797	14.915	13.7733	14.8511	13.192	NA	13.2137	sp|P06731|CEAM5_HUMAN;sp|P13688|CEAM1_HUMAN;sp|P31997|CEAM8_HUMAN
sp|P06732|KCRM_HUMAN	15.7676	NA	NA	NA	NA	NA	15.4829	NA	NA	NA	NA	NA	NA	NA	NA	NA	NA	11.8634	NA	NA	sp|P06732|KCRM_HUMAN
sp|P06733|ENOA_HUMAN	16.356	15.3541	15.8618	16.0863	15.6655	15.5156	16.5517	18.5063	20.0067	18.0929	15.9349	14.8334	15.9592	15.6851	16.5044	17.3133	16.1412	17.952	17.2017	16.7141	sp|P06733|ENOA_HUMAN
sp|P06737|PYGL_HUMAN	11.8437	NA	12.178	11.9757	NA	12.2572	11.9242	13.1655	12.6581	12.7466	NA	NA	NA	11.2955	11.9478	12.2621	NA	11.3499	NA	11.3401	sp|P06737|PYGL_HUMAN
sp|P06744|G6PI_HUMAN	NA	NA	NA	NA	NA	NA	NA	12.7588	13.5422	11.6904	NA	NA	NA	NA	NA	NA	NA	NA	NA	NA	sp|P06744|G6PI_HUMAN
sp|P06748|NPM_HUMAN	18.3015	18.5954	17.6539	17.751	17.7542	17.4257	17.1555	18.0329	17.6231	17.2553	18.2642	17.2288	17.4462	16.8711	17.9991	18.3632	17.6282	18.724	17.9072	18.0672	sp|P06748|NPM_HUMAN
sp|P06753|TPM3_HUMAN	15.2266	14.0873	14.2049	13.4589	14.7419	16.171	13.8783	15.7956	13.7803	13.8123	12.4882	12.0843	12.9358	13.0111	16.3226	15.5207	13.699	16.1114	13.7902	15.1324	sp|P06753|TPM3_HUMAN
sp|P06756|ITAV_HUMAN	NA	12.7395	NA	NA	13.7444	12.0732	NA	NA	13.1422	NA	NA	NA	12.7433	11.492	NA	11.606	NA	NA	NA	NA	sp|P06756|ITAV_HUMAN
sp|P06865|HEXA_HUMAN	16.6102	16.9109	16.5882	15.7544	16.5467	16.7452	17.0398	16.9692	16.6899	16.9166	16.6156	16.0383	16.5944	16.5165	16.3558	16.318	15.8599	16.1635	16.261	16.2881	sp|P06865|HEXA_HUMAN
sp|P07108|ACBP_HUMAN	13.0893	12.8816	11.7797	13.6246	12.8781	11.2505	13.6313	14.9601	13.6457	13.4656	13.6179	12.438	13.6411	12.8559	13.1017	13.7395	12.6953	13.0805	11.9481	12.7385	sp|P07108|ACBP_HUMAN
sp|P07195|LDHB_HUMAN	12.6297	13.4408	16.7699	14.5304	14.3946	14.7976	14.3302	12.2097	14.7542	11.063	11.6981	12.8524	11.1222	13.4014	13.2091	12.3796	NA	11.4932	11.5854	12.9587	sp|P07195|LDHB_HUMAN
sp|P07203|GPX1_HUMAN	NA	NA	12.8863	12.3669	NA	13.1242	NA	13.4047	13.5255	12.6999	12.4023	NA	13.4281	12.6063	13.883	12.5682	12.267	NA	13.0541	13.308	sp|P07203|GPX1_HUMAN
sp|P07225|PROS_HUMAN	10.8672	13.1564	NA	12.6352	NA	NA	12.5354	9.53565	8.85185	9.74852	NA	NA	NA	NA	NA	10.8468	8.97249	8.74861	8.35546	9.83934	sp|P07225|PROS_HUMAN
sp|P07237|PDIA1_HUMAN	12.8853	12.3199	11.2913	12.317	11.2162	12.1921	12.8088	15.354	13.093	12.5258	11.9778	10.3057	11.7575	11.9264	11.9722	12.9155	11.9399	12.9735	12.2019	12.3329	sp|P07237|PDIA1_HUMAN
sp|P07339|CATD_HUMAN	21.1183	20.5914	18.5676	19.9706	19.8965	19.0049	20.0753	22.1436	21.1959	21.3655	21.6498	20.0376	20.7143	20.9958	20.2475	20.8278	20.7681	22.4522	20.8923	20.7593	sp|P07339|CATD_HUMAN
sp|P07355|ANXA2_HUMAN	21.5351	21.0535	21.3934	20.6114	20.96	21.1036	21.3375	21.1997	21.0848	20.3589	21.0316	20.4482	20.265	21.4984	20.6071	20.337	20.0885	20.3405	20.0616	19.9931	sp|P07355|ANXA2_HUMAN
sp|P07384|CAN1_HUMAN	20.6081	20.444	21.0955	20.944	21.1178	21.2483	20.8821	21.6913	21.2951	20.9318	20.8756	21.2689	21.2585	21.3324	21.2663	21.1236	21.3999	20.3955	21.0084	21.1884	sp|P07384|CAN1_HUMAN
sp|P07437|TBB5_HUMAN	12.6502	11.7787	11.5908	11.1715	NA	13.1509	12.3003	15.2699	13.6637	11.6916	11.3798	NA	11.6433	11.314	12.0703	12.5929	12.7091	13.4044	12.5808	12.0065	sp|P07437|TBB5_HUMAN
sp|P07602|SAP_HUMAN	18.99	18.6525	18.6693	18.7518	18.6226	18.7386	19.2029	19.283	19.1408	19.1022	19.1065	18.5707	19.4908	18.9239	18.5235	19.0824	18.5454	18.3367	18.8011	19.0369	sp|P07602|SAP_HUMAN
sp|P07686|HEXB_HUMAN	19.5376	19.634	19.7183	19.5079	19.0376	19.6993	19.7782	20.0148	19.7209	19.9627	19.617	19.6237	19.7307	19.7762	19.5709	19.8704	19.6544	19.1279	19.7736	19.6105	sp|P07686|HEXB_HUMAN
sp|P07711|CATL1_HUMAN	11.1947	12.5242	11.593	14.1476	13.4898	13.8466	11.9166	13.9605	13.8453	11.1329	11.2467	13.0706	NA	13.2717	12.3432	11.7566	13.217	13.7129	12.2375	11.2777	sp|P07711|CATL1_HUMAN
sp|P07737|PROF1_HUMAN	15.2923	14.079	14.1561	14.1659	13.7668	14.5186	14.6356	17.154	15.1875	14.5933	13.8331	12.36	13.7362	13.7523	14.4437	15.5661	14.69	15.0689	14.3903	14.6601	sp|P07737|PROF1_HUMAN
sp|P07814|SYEP_HUMAN	NA	NA	NA	NA	NA	NA	NA	11.031	10.4684	NA	NA	NA	NA	NA	NA	NA	NA	9.6542	NA	NA	sp|P07814|SYEP_HUMAN
sp|P07858|CATB_HUMAN	16.548	16.0643	14.4693	15.1776	14.6256	15.7985	14.7627	17.5071	16.0589	15.9411	16.4982	14.7963	15.4523	16.2613	15.3102	16.0231	16.2408	16.5847	16.6226	16.5744	sp|P07858|CATB_HUMAN
sp|P07900|HS90A_HUMAN	14.943	14.1137	14.2963	14.1128	14.3163	14.4397	14.9708	17.3225	16.4318	15.0829	14.5057	13.8195	14.7606	14.8008	14.0887	14.9857	14.9597	14.566	14.3038	14.6951	sp|P07900|HS90A_HUMAN
sp|P07910|HNRPC_HUMAN	NA	NA	NA	NA	NA	NA	NA	7.30901	8.82834	NA	NA	NA	NA	NA	NA	NA	NA	8.0935	NA	NA	sp|P07910|HNRPC_HUMAN
sp|P07954|FUMH_HUMAN	NA	NA	NA	NA	NA	NA	NA	13.5476	11.3045	NA	NA	NA	NA	NA	NA	NA	NA	9.51124	NA	NA	sp|P07954|FUMH_HUMAN
sp|P07996|TSP1_HUMAN	13.1115	14.0701	12.4579	11.3615	NA	11.1336	13.3818	10.7894	9.83753	10.5797	NA	NA	10.7731	NA	NA	NA	NA	NA	NA	NA	sp|P07996|TSP1_HUMAN
sp|P08174|DAF_HUMAN	13.9849	11.3812	NA	10.9927	13.0173	11.3168	12.9067	14.3005	14.4668	11.4269	12.4501	11.3531	13.2553	13.0969	12.4251	13.6773	12.7396	12.5831	13.0029	13.1356	sp|P08174|DAF_HUMAN
sp|P08195|4F2_HUMAN	NA	NA	NA	NA	NA	NA	NA	NA	12.2439	NA	11.7572	NA	12.258	NA	12.0727	NA	11.9745	NA	11.625	11.4644	sp|P08195|4F2_HUMAN
sp|P08236|BGLR_HUMAN	16.9281	16.5502	16.4015	16.6762	16.0103	16.3416	17.1752	16.6225	16.4632	15.7642	16.375	16.5151	16.6581	15.8425	16.5037	15.8163	16.0669	16.0409	16.5869	16.1044	sp|P08236|BGLR_HUMAN
sp|P08238|HS90B_HUMAN	10.9717	11.0525	10.8399	10.1873	11.6012	10.9028	12.8206	15.7522	14.3634	12.7295	12.5867	9.76525	12.018	10.0276	10.0287	12.1894	10.6914	11.2128	10.9333	11.7819	sp|P08238|HS90B_HUMAN
sp|P08294|SODE_HUMAN	NA	7.63978	8.54303	10.3258	8.17543	NA	10.2596	9.16636	11.4773	12.4845	NA	NA	9.93964	8.63119	9.19324	9.1746	NA	NA	NA	9.11513	sp|P08294|SODE_HUMAN
sp|P08574|CY1_HUMAN	14.4109	13.664	14.2967	14.5369	14.3822	14.6071	14.3049	14.4332	15.1776	13.2995	14.5303	14.4719	14.5998	14.4036	14.8662	14.598	14.4077	14.0654	14.5431	14.7803	sp|P08574|CY1_HUMAN
sp|P08582|TRFM_HUMAN	16.0226	15.1298	15.6593	15.1042	12.1631	14.1933	16.9335	14.1174	14.682	12.6514	13.8001	12.5331	13.9617	13.7539	11.5792	NA	12.2758	NA	13.6806	11.7451	sp|P08582|TRFM_HUMAN
sp|P08603|CFAH_HUMAN	10.1639	NA	NA	11.3045	NA	11.7815	9.95446	12.5077	11.6982	9.92747	NA	NA	NA	NA	NA	11.4354	NA	NA	NA	9.92038	sp|P08603|CFAH_HUMAN
sp|P08670|VIME_HUMAN	14.0027	12.8349	13.1484	12.8764	13.1238	14.4528	12.9398	16.3929	12.1698	12.2529	13.6692	12.0275	12.7797	12.6498	13.86	13.5026	13.9782	14.085	13.2666	14.4553	sp|P08670|VIME_HUMAN
sp|P08727|K1C19_HUMAN	20.1374	19.4502	19.145	19.7229	18.9657	19.0505	20.0145	19.8686	19.8442	19.7719	19.2818	19.5638	19.4913	19.5205	19.4282	19.7002	20.2686	19.9282	19.841	20.1541	sp|P08727|K1C19_HUMAN
sp|P08754|GNAI3_HUMAN	NA	11.4928	12.7236	12.3633	NA	12.3206	12.1522	13.2777	12.7488	12.2253	11.8478	11.0331	12.8039	12.1477	12.2572	12.6037	12.7646	12.6178	11.7555	12.618	sp|P08754|GNAI3_HUMAN
sp|P08758|ANXA5_HUMAN	15.0679	15.7423	15.324	14.9933	14.3387	15.1162	15.7753	16.5879	16.1082	16.3113	15.5741	14.8537	15.9306	15.4621	15.3955	16.3551	14.8288	14.8702	14.3958	15.436	sp|P08758|ANXA5_HUMAN
sp|P08779|K1C16_HUMAN	20.8673	19.7015	19.9154	19.4388	20.0859	19.6333	20.5298	22.0693	20.9386	21.2046	20.0379	19.7819	19.123	19.1642	20.3752	21.1585	20.1272	23.3206	20.4317	21.0524	sp|P08779|K1C16_HUMAN
sp|P08842|STS_HUMAN	18.4234	18.6512	17.1338	16.6959	17.2358	18.3557	18.3921	17.2651	18.1726	15.3146	18.7669	18.7695	18.3655	18.1961	18.6561	18.2645	18.0287	17.7859	18.5968	17.6297	sp|P08842|STS_HUMAN
sp|P08865|RSSA_HUMAN	11.3871	NA	10.8257	NA	NA	NA	11.6026	15.647	13.0736	NA	NA	11.9042	10.8301	NA	NA	11.1207	11.3124	12.869	11.0892	11.0612	sp|P08865|RSSA_HUMAN
sp|P09104|ENOG_HUMAN	NA	NA	NA	NA	NA	NA	NA	11.613	13.3389	11.3322	12.1839	NA	12.1481	11.4653	11.8831	11.5707	NA	NA	NA	NA	sp|P09104|ENOG_HUMAN
sp|P09110|THIK_HUMAN	NA	NA	NA	NA	NA	11.8637	NA	10.8356	13.505	11.0453	13.1724	NA	12.0554	13.5446	12.6714	12.771	12.1386	11.0114	12.2502	NA	sp|P09110|THIK_HUMAN
sp|P09211|GSTP1_HUMAN	14.9116	14.0462	14.3107	13.758	14.0738	14.0723	15.1898	17.3731	15.9612	15.2106	14.1019	13.652	14.4261	14.2803	14.679	15.3073	14.6795	16.0731	15.0545	14.7021	sp|P09211|GSTP1_HUMAN
sp|P09237|MMP7_HUMAN	12.892	NA	12.9661	NA	NA	NA	12.6232	NA	12.4427	NA	NA	NA	NA	NA	NA	NA	NA	NA	NA	NA	sp|P09237|MMP7_HUMAN
sp|P09382|LEG1_HUMAN	11.2164	10.2004	10.907	NA	NA	11.3694	10.8773	13.9629	11.4712	11.5551	11.9139	NA	NA	10.7095	11.8798	11.4638	11.8462	11.8806	12.1366	11.4895	sp|P09382|LEG1_HUMAN
sp|P09467|F16P1_HUMAN	11.1573	10.4109	11.4624	10.0776	12.3266	12.3695	9.2501	12.0147	10.9819	12.3282	10.8418	9.51814	12.5375	11.6645	12.5584	11.9644	11.386	10.5336	11.5293	11.6855	sp|P09467|F16P1_HUMAN
sp|P09525|ANXA4_HUMAN	14.7902	15.4519	15.7853	15.3163	14.9612	15.991	15.0319	16.3286	17.0533	16.5191	15.9851	15.6145	16.1302	16.4926	16.3971	16.8771	15.4824	15.4999	15.3503	16.5166	sp|P09525|ANXA4_HUMAN
sp|P09543|CN37_HUMAN	14.5464	14.6351	14.6138	14.055	14.533	14.6693	14.7814	14.446	14.352	13.2493	14.2891	14.2947	14.2025	13.9615	14.064	14.1301	13.8092	14.5024	13.8657	13.9375	sp|P09543|CN37_HUMAN
sp|P09601|HMOX1_HUMAN	13.4502	12.9757	13.9225	13.5586	11.4668	12.5465	13.172	15.3024	14.7983	13.646	13.592	12.5374	13.1563	14.08	12.9426	13.1343	13.2541	13.4795	13.0429	13.7345	sp|P09601|HMOX1_HUMAN
sp|P09622|DLDH_HUMAN	NA	NA	14.957	14.2844	14.4419	14.4011	NA	14.3447	15.535	13.7718	13.4681	14.385	14.7569	15.3944	15.5801	15.1338	13.9899	14.031	14.8224	14.6373	sp|P09622|DLDH_HUMAN
sp|P09651|ROA1_HUMAN	NA	8.84021	NA	NA	NA	NA	NA	11.9988	9.93164	NA	NA	NA	NA	NA	NA	NA	NA	10.974	NA	NA	sp|P09651|ROA1_HUMAN;sp|Q32P51|RA1L2_HUMAN
sp|P09668|CATH_HUMAN	20.1172	19.5841	18.414	19.1827	18.8566	20.1662	19.1458	19.4307	19.3361	19.5893	19.9958	18.8097	19.3613	19.5982	18.601	19.6555	19.2483	17.8096	19.0139	19.3822	sp|P09668|CATH_HUMAN
sp|P09758|TACD2_HUMAN	NA	NA	NA	NA	NA	NA	NA	12.9988	NA	NA	NA	NA	NA	NA	NA	11.8704	NA	NA	NA	NA	sp|P09758|TACD2_HUMAN
sp|P09960|LKHA4_HUMAN	11.488	10.0898	11.1238	10.0728	10.3649	11.7931	11.2774	14.3258	12.4683	11.4815	10.8487	NA	10.5739	10.245	10.919	11.7685	11.4206	12.5531	11.2374	12.2031	sp|P09960|LKHA4_HUMAN
sp|P09972|ALDOC_HUMAN	13.7214	15.2003	16.0009	15.8033	15.7316	15.5091	14.7161	15.6666	15.2881	15.7896	15.0041	14.8859	15.0903	15.0389	15.4359	15.3939	14.8981	13.1316	14.4639	15.4586	sp|P09972|ALDOC_HUMAN
sp|P0C0L5|CO4B_HUMAN	NA	NA	NA	NA	NA	13.1894	NA	13.9993	12.0092	NA	NA	NA	NA	NA	NA	NA	NA	NA	NA	NA	sp|P0C0L5|CO4B_HUMAN
sp|P0C7H8|KRA23_HUMAN	10.9981	14.3697	13.3613	13.1012	14.7341	12.6891	12.2358	16.3267	12.5019	10.4527	14.7991	11.1797	15.598	15.2484	11.8973	16.3207	15.7829	17.2967	16.7393	11.3644	sp|P0C7H8|KRA23_HUMAN;sp|Q9BYT5|KRA22_HUMAN;sp|Q9BYU5|KRA21_HUMAN
sp|P0C869|PA24B_HUMAN	NA	NA	11.5913	NA	NA	11.0694	10.7536	13.6107	12.5424	10.5815	10.4883	NA	NA	NA	10.4728	10.4588	10.3155	10.899	10.3318	NA	sp|P0C869|PA24B_HUMAN
sp|P0C870|JMJD7_HUMAN	12.9615	10.7714	15.4097	14.0799	14.4826	14.6244	13.6136	11.8123	15.7676	11.6989	14.1642	13.5063	9.7731	13.8716	16.1837	14.9976	NA	12.771	NA	14.418	sp|P0C870|JMJD7_HUMAN
sp|P0CF74|IGLC6_HUMAN	17.5243	15.1018	15.1818	16.7443	16.234	17.6562	17.8263	18.592	17.7642	16.7361	16.2789	14.9468	16.5417	15.4684	16.4736	17.916	16.802	17.083	14.99	16.5346	sp|P0CF74|IGLC6_HUMAN;sp|P0DOY2|IGLC2_HUMAN;sp|P0DOY3|IGLC3_HUMAN
sp|P0CG47|UBB_HUMAN	21.3505	20.9079	21.1335	21.0547	21.4056	21.3244	20.3439	20.1289	20.0296	19.3171	21.3737	20.0369	20.3794	20.9246	21.0308	21.1299	19.4432	20.4194	19.5592	20.9629	sp|P0CG47|UBB_HUMAN;sp|P0CG48|UBC_HUMAN;sp|P62979|RS27A_HUMAN;sp|P62987|RL40_HUMAN
sp|P0DJI8|SAA1_HUMAN	NA	NA	NA	NA	NA	14.8972	NA	NA	9.75989	NA	NA	NA	NA	NA	NA	NA	NA	NA	NA	NA	sp|P0DJI8|SAA1_HUMAN
sp|P0DMV8|HS71A_HUMAN	15.279	14.7933	14.7383	14.8688	15.129	15.098	15.552	17.7221	16.4527	15.6339	15.3457	14.694	15.6066	15.4767	14.8919	15.5737	15.2848	15.5094	14.9326	15.0262	sp|P0DMV8|HS71A_HUMAN
sp|P0DOX6|IGM_HUMAN	11.7432	NA	NA	13.3924	NA	13.9854	11.9349	15.8169	15.3835	10.291	9.44932	9.59681	10.2209	NA	10.268	15.7177	10.1989	9.88021	NA	10.7912	sp|P0DOX6|IGM_HUMAN
sp|P0DOX7|IGK_HUMAN	19.6494	16.7446	16.287	16.9553	17.7607	17.8058	19.9121	20.2188	18.2786	18.6966	18.2994	17.8329	18.464	17.9524	18.2852	19.6138	18.1243	18.2838	17.387	18.5511	sp|P0DOX7|IGK_HUMAN
sp|P0DP23|CALM1_HUMAN	16.0729	15.4042	16.7529	16.3829	16.9574	17.4451	16.4508	18.879	17.3196	17.4194	16.4168	16.0055	16.7842	16.3588	16.8287	16.9586	16.8038	17.0029	16.3775	16.9966	sp|P0DP23|CALM1_HUMAN
sp|P0DPA2|VSIG8_HUMAN	NA	10.1768	9.82202	8.97932	8.32287	7.59376	NA	10.9421	9.54856	10.7107	10.1141	NA	10.9376	11.0312	9.13012	11.2492	11.3505	10.4834	11.4593	NA	sp|P0DPA2|VSIG8_HUMAN
sp|P10155|RO60_HUMAN	17.0979	17.1047	16.8434	17.2724	16.9786	17.0174	17.4762	17.0378	16.8549	16.0591	17.2362	16.7438	16.8704	17.65	17.2009	17.8052	17.3479	17.7066	17.197	17.0738	sp|P10155|RO60_HUMAN
sp|P10253|LYAG_HUMAN	18.5228	17.9408	18.321	17.5038	18.1677	18.5546	17.8546	19.0929	17.9296	18.2215	18.2867	18.2389	18.1061	17.5093	18.1354	18.4013	17.9555	17.7708	17.814	17.2382	sp|P10253|LYAG_HUMAN
sp|P10515|ODP2_HUMAN	NA	NA	12.1381	NA	NA	11.1316	NA	12.5839	11.8253	NA	12.7943	NA	NA	NA	NA	NA	NA	NA	NA	NA	sp|P10515|ODP2_HUMAN
sp|P10599|THIO_HUMAN	21.6664	21.4908	21.3731	21.1687	20.8734	21.6921	21.6508	21.3716	21.1586	21.72	21.2305	21.1276	21.4667	21.2135	21.3684	21.8393	20.9867	21.1893	21.284	21.5741	sp|P10599|THIO_HUMAN
sp|P10619|PPGB_HUMAN	16.6139	16.5073	16.9875	16.5685	15.8929	16.1806	16.5598	17.0857	16.7841	16.3018	16.5214	16.1167	15.41	17.0188	16.4358	16.3091	16.7242	16.2572	17.1168	16.3192	sp|P10619|PPGB_HUMAN
sp|P10768|ESTD_HUMAN	12.5444	10.1973	14.4911	12.9361	12.4872	14.4035	13.0836	13.3525	14.3824	11.5645	12.1157	11.0616	9.67649	11.3022	15.1289	14.4063	9.98542	11.5679	10.3757	12.9047	sp|P10768|ESTD_HUMAN
sp|P10809|CH60_HUMAN	12.4871	10.4878	14.9289	14.8227	13.7914	14.5071	11.2586	13.8302	15.3255	13.1545	14.1117	13.4367	14.725	15.2054	15.3898	14.6219	14.2938	14.3941	13.9416	14.2411	sp|P10809|CH60_HUMAN
sp|P10909|CLUS_HUMAN	17.7315	18.7558	16.3631	18.1997	15.1705	17.1339	17.5704	15.9103	15.8473	15.0749	15.7252	14.3633	15.0248	14.4081	15.3775	15.3989	14.4265	15.2383	15.9665	15.1534	sp|P10909|CLUS_HUMAN
sp|P11021|BIP_HUMAN	18.8428	19.5834	18.7308	18.4943	18.3585	19.4768	19.5893	19.5639	18.5783	19.303	18.7505	19.205	19.0743	18.8734	18.5069	19.0159	18.8568	18.0616	18.8795	18.4853	sp|P11021|BIP_HUMAN
sp|P11117|PPAL_HUMAN	11.3916	12.3146	10.9698	11.3862	10.8274	11.5187	12.1185	12.4376	12.6673	9.92444	12.2895	11.9068	11.8209	11.738	12.0883	11.8076	11.8967	11.5324	11.7112	11.5183	sp|P11117|PPAL_HUMAN
sp|P11142|HSP7C_HUMAN	13.4056	13.4449	15.0691	13.5054	12.8126	13.123	12.1887	14.9525	14.6325	14.8532	14.1142	13.4382	15.7209	13.2688	13.5394	13.3885	13.3884	14.5063	13.4157	13.6417	sp|P11142|HSP7C_HUMAN
sp|P11182|ODB2_HUMAN	13.5887	13.0776	14.8444	13.9207	13.4419	13.6436	13.7184	14.0718	14.7348	12.4264	12.8205	13.9462	14.7252	14.7668	15.2391	14.1631	13.8427	12.4014	13.9901	13.6673	sp|P11182|ODB2_HUMAN
sp|P11233|RALA_HUMAN	11.3175	11.4265	10.9964	10.8456	9.82312	11.2521	10.9706	12.3708	11.7051	NA	11.2411	NA	11.616	10.8911	10.6444	11.0588	11.3351	NA	10.0257	11.6187	sp|P11233|RALA_HUMAN
sp|P11279|LAMP1_HUMAN	18.8113	17.9864	18.1104	18.0635	17.3731	17.4236	18.3136	18.2768	18.6249	17.7926	17.7513	18.0288	18.4703	17.7329	17.3778	17.4867	18.397	18.1749	18.4558	18.3892	sp|P11279|LAMP1_HUMAN
sp|P12035|K2C3_HUMAN	13.3637	12.3804	12.6788	12.9493	12.3337	12.0421	12.4423	12.1665	11.6104	12.574	10.6869	10.9425	13.4083	13.2027	12.8019	13.5028	13.8949	14.0734	13.6256	12.2455	sp|P12035|K2C3_HUMAN
sp|P12081|SYHC_HUMAN	14.4688	12.3046	11.686	15.3572	15.2885	14.6378	13.3889	14.5826	16.8867	15.3534	14.7974	15.0046	15.2361	16.5937	14.1303	17.1074	15.6948	14.939	16.3914	17.3166	sp|P12081|SYHC_HUMAN
sp|P12268|IMDH2_HUMAN	16.1571	16.6585	17.7352	19.945	16.9114	16.9389	17.6713	16.6871	17.9383	17.0359	17.0306	16.933	17.2793	16.5251	17.0644	17.0843	16.9497	16.8578	16.8872	16.2769	sp|P12268|IMDH2_HUMAN
sp|P12273|PIP_HUMAN	23.0021	24.8047	22.2184	24.5195	19.8903	20.3163	23.5425	19.451	20.0118	20.129	20.8813	18.9951	20.3261	19.9604	20.2254	20.1204	17.9039	19.7064	20.8332	19.445	sp|P12273|PIP_HUMAN
sp|P12277|KCRB_HUMAN	11.1935	8.6173	9.58061	NA	9.15854	9.48097	10.4029	12.7367	9.82317	10.9068	9.78493	NA	9.08263	9.17993	8.05594	10.354	9.45015	9.98781	9.86081	10.1911	sp|P12277|KCRB_HUMAN
sp|P12429|ANXA3_HUMAN	11.9445	10.2814	9.68141	10.8065	9.38143	11.3387	12.0767	13.5469	10.9555	10.4156	10.0873	NA	10.0887	10.1482	10.0454	11.5401	10.4116	10.944	9.89429	10.2132	sp|P12429|ANXA3_HUMAN
sp|P12532|KCRU_HUMAN	15.9678	14.0102	16.8872	15.8928	15.7934	16.2301	14.2528	14.8993	16.3501	15.4144	15.6391	15.588	16.3373	16.239	16.6249	16.7423	16.6733	16.0149	16.2226	16.1134	sp|P12532|KCRU_HUMAN
sp|P12814|ACTN1_HUMAN	12.5099	NA	NA	NA	NA	10.7584	12.3781	11.2146	NA	NA	NA	NA	NA	NA	NA	10.8657	10.6067	10.8911	10.7768	11.9786	sp|P12814|ACTN1_HUMAN
sp|P12821|ACE_HUMAN	10.8835	NA	NA	NA	NA	NA	NA	11.6916	NA	NA	NA	NA	NA	NA	NA	NA	NA	NA	NA	NA	sp|P12821|ACE_HUMAN
sp|P12830|CADH1_HUMAN	13.1197	12.8489	NA	13.0183	11.7729	12.74	12.8579	11.8726	15.7293	15.5201	NA	13.0676	13.4938	13.2952	13.1243	13.7492	14.0545	12.5595	12.5499	12.9959	sp|P12830|CADH1_HUMAN
sp|P12955|PEPD_HUMAN	16.1662	13.4569	17.8576	16.5496	17.3137	17.5955	16.3621	16.8359	18.4452	17.6846	15.7838	16.2475	16.7298	16.0041	18.5881	17.3879	15.4809	16.9479	17.2053	16.8098	sp|P12955|PEPD_HUMAN
sp|P13010|XRCC5_HUMAN	NA	NA	NA	NA	NA	NA	NA	13.607	11.2136	NA	NA	NA	NA	NA	NA	8.35937	10.8832	NA	NA	NA	sp|P13010|XRCC5_HUMAN
sp|P13284|GILT_HUMAN	11.8749	13.6684	18.1112	11.8693	11.6421	17.3309	19.8017	20.0653	20.8478	12.4121	16.0532	16.0852	14.6872	14.024	14.3964	12.9958	11.9621	13.3345	20.1798	17.8068	sp|P13284|GILT_HUMAN
sp|P13473|LAMP2_HUMAN	19.4873	19	19.047	19.1536	18.7069	18.6968	19.1154	20.04	18.9761	19.4845	19.9267	19.232	20.2787	19.2878	18.898	19.5958	18.9078	19.2081	19.5539	19.3526	sp|P13473|LAMP2_HUMAN
sp|P13489|RINI_HUMAN	12.5123	11.7481	11.8286	12.0048	11.4891	12.7663	12.371	15.3562	13.6455	12.8443	12.3939	11.4584	11.9606	12.4992	12.0391	12.2691	12.3455	11.9931	11.918	12.562	sp|P13489|RINI_HUMAN
sp|P13639|EF2_HUMAN	14.4811	13.368	16.7855	16.2239	15.2638	15.7357	13.848	16.0344	16.6841	13.254	15.4074	15.1367	13.7076	16.0476	16.684	16.1569	12.5839	14.5591	14.7888	15.7314	sp|P13639|EF2_HUMAN
sp|P13645|K1C10_HUMAN	30.3891	30.3425	30.1077	30.1775	30.1935	30.3108	30.3576	30.4324	30.2548	29.9347	30.5901	30.3384	30.337	29.9834	30.2978	30.3863	30.3853	30.0206	30.1584	30.4693	sp|P13645|K1C10_HUMAN
sp|P13646|K1C13_HUMAN	17.773	17.5154	16.9278	17.3786	16.7293	17.5075	17.6397	17.834	17.87	18.2723	17.2634	17.6363	17.6647	17.2899	18.2386	18.2488	17.843	18.8167	17.8736	17.7283	sp|P13646|K1C13_HUMAN
sp|P13647|K2C5_HUMAN	26.086	25.6809	25.5126	25.4248	25.7232	25.5535	26.1443	26.2719	26.9126	25.9956	26.0608	26.3404	25.9175	25.9574	26.1621	25.8983	26.3875	26.3956	26.0092	25.864	sp|P13647|K2C5_HUMAN
sp|P13693|TCTP_HUMAN	11.592	10.5873	10.8459	NA	11.0283	NA	10.6248	14.5043	12.353	11.0441	NA	NA	NA	NA	10.0677	11.9949	10.6034	12.3783	11.3018	11.0284	sp|P13693|TCTP_HUMAN
sp|P13716|HEM2_HUMAN	18.9442	19.2724	19.0733	18.9751	18.8707	19.3829	19.0374	19.2245	19.2544	19.3227	18.9045	19.1057	19.2875	19.1959	19.3566	18.9103	18.9655	18.7243	19.0487	19.3689	sp|P13716|HEM2_HUMAN
sp|P13761|2B17_HUMAN	NA	NA	NA	NA	NA	12.8722	NA	12.4314	NA	NA	NA	NA	NA	NA	NA	NA	NA	NA	NA	12.3316	sp|P13761|2B17_HUMAN
sp|P13796|PLSL_HUMAN	17.0817	17.4116	16.8658	17.3396	17.366	17.9457	17.502	17.7575	17.7004	15.9621	17.937	16.755	17.4214	17.3867	17.4654	17.2428	16.909	17.6802	17.4122	17.6118	sp|P13796|PLSL_HUMAN
sp|P13797|PLST_HUMAN	17.5646	17.5526	17.0859	17.5145	17.5734	18.409	17.8691	18.6157	18.1901	17.0533	18.059	17.0455	17.7803	17.8244	18.1768	17.9699	17.3441	18.3464	17.7783	18.137	sp|P13797|PLST_HUMAN
sp|P13798|ACPH_HUMAN	18.9217	18.2115	18.8373	18.7561	18.606	19.1423	18.2306	18.396	19.2859	19.3465	18.695	18.773	18.6811	19.0463	19.2928	18.622	19.038	18.6321	19.2555	19.2367	sp|P13798|ACPH_HUMAN
sp|P13987|CD59_HUMAN	14.5718	13.2715	12.7727	13.2775	12.7841	13.1195	14.1103	14.7756	14.027	13.8758	13.7513	12.557	14.1958	13.4517	13.061	14.0522	12.9993	12.1791	13.2182	13.3966	sp|P13987|CD59_HUMAN
sp|P14174|MIF_HUMAN	14.516	14.6913	14.8462	14.6325	14.6929	14.9779	14.7407	17.7185	16.2884	16.0921	15.7607	14.5999	15.6723	15.4422	14.5251	15.5318	15.094	15.5104	15.8108	15.5696	sp|P14174|MIF_HUMAN
sp|P14314|GLU2B_HUMAN	NA	NA	NA	NA	NA	NA	NA	9.57021	7.03533	NA	NA	NA	NA	NA	NA	NA	NA	NA	NA	NA	sp|P14314|GLU2B_HUMAN
sp|P14384|CBPM_HUMAN	16.9852	16.6185	15.4968	16.0328	16.0735	16.0561	16.5508	17.4141	17.2845	17.0116	17.524	16.8885	17.2183	17.5292	16.6845	16.8238	17.3457	16.3645	17.2972	16.7971	sp|P14384|CBPM_HUMAN
sp|P14406|CX7A2_HUMAN	14.5652	14.3603	15.381	15.7846	15.7451	15.8663	15.0593	16.0979	16.149	15.5803	14.0414	14.9723	16.0959	16.0371	16.1322	15.2426	14.8739	14.1119	15.6874	16.287	sp|P14406|CX7A2_HUMAN
sp|P14550|AK1A1_HUMAN	NA	10.6224	NA	NA	NA	NA	NA	12.5153	NA	10.6353	NA	NA	10.6746	NA	NA	NA	10.9251	NA	9.73837	9.99527	sp|P14550|AK1A1_HUMAN
sp|P14618|KPYM_HUMAN	15.627	15.4278	16.2738	18.2171	18.704	17.0088	15.8732	19.0096	19.8277	19.7558	18.2505	18.3957	18.6862	18.9973	18.2192	19.0922	18.8963	17.914	19.1776	19.4888	sp|P14618|KPYM_HUMAN
sp|P14625|ENPL_HUMAN	13.2273	11.5379	12.5316	12.7778	12.627	13.6577	13.3864	14.6718	13.3167	12.4353	12.6094	12.8225	12.7944	13.3999	13.0168	12.6456	12.4602	12.9288	12.575	13.224	sp|P14625|ENPL_HUMAN
sp|P14678|RSMB_HUMAN	12.5588	11.7057	14.9213	14.9778	13.828	14.7794	11.9481	15.8408	16.5295	15.6967	14.359	13.83	15.4369	14.7985	15.5217	15.4422	14.9696	14.941	15.1446	14.4307	sp|P14678|RSMB_HUMAN;sp|P63162|RSMN_HUMAN
sp|P14735|IDE_HUMAN	14.378	14.7036	15.8659	15.2635	15.193	15.7542	15.0939	16.2759	17.4542	16.3585	15.1215	15.074	15.4085	15.2463	16.2915	16.1093	15.3382	15.809	15.7212	15.8365	sp|P14735|IDE_HUMAN
sp|P14921|ETS1_HUMAN	19.5445	16.8074	17.072	17.9687	18.1325	17.3249	18.448	17.6925	18.3461	19.5675	17.5669	18.2155	17.8457	17.284	18.7758	19.0415	17.887	19.4506	19.6943	19.4162	sp|P14921|ETS1_HUMAN;sp|P15036|ETS2_HUMAN
sp|P14923|PLAK_HUMAN	18.3116	15.6983	17.4143	16.9772	17.7351	17.3059	16.6014	19.5484	18.8826	16.6855	16.9566	16.3032	16.1774	16.963	17.2979	17.7008	16.5234	19.2059	17.3597	17.3921	sp|P14923|PLAK_HUMAN
sp|P15104|GLNA_HUMAN	13.6978	14.8037	15.0975	15.0432	14.4341	15.2879	14.3682	16.5805	14.6369	13.6757	13.8275	14.6936	14.3974	12.5298	15.297	14.8215	14.5033	15.6629	15.2596	15.3339	sp|P15104|GLNA_HUMAN
sp|P15289|ARSA_HUMAN	15.9887	16.4134	16.3675	15.6354	16.3252	16.3212	16.1542	15.5914	16.319	16.6594	15.9405	16.2779	16.3849	15.704	16.2903	16.1167	16.1975	15.0524	15.7603	16.1607	sp|P15289|ARSA_HUMAN
sp|P15309|PPAP_HUMAN	15.4197	16.6776	15.5246	16.7017	15.8096	16.0546	16.06	17.5167	16.8328	16.082	15.7999	16.7346	15.8301	16.4012	16.5615	16.5757	16.4524	17.1031	16.8448	16.877	sp|P15309|PPAP_HUMAN
sp|P15311|EZRI_HUMAN	12.4917	11.7681	12.4845	11.4857	NA	12.2499	11.9635	14.6969	13.4661	11.7507	12.4822	NA	12.0432	12.6698	12.2193	12.5043	12.3779	12.2724	11.694	12.1236	sp|P15311|EZRI_HUMAN
sp|P15408|FOSL2_HUMAN	16.035	15.9776	15.5485	15.1954	16.3013	15.8386	15.9402	16.0779	15.6498	14.872	15.1394	15.6455	15.7538	15.3898	15.6931	15.6987	15.4492	15.1558	15.5812	15.6822	sp|P15408|FOSL2_HUMAN
sp|P15531|NDKA_HUMAN	12.6242	10.7683	12.1883	12.472	12.6375	12.5279	12.2173	14.7601	15.0815	13.5294	12.7079	11.6297	13.9032	12.6603	13.4474	13.9209	12.2481	13.5194	13.2571	13.5623	sp|P15531|NDKA_HUMAN
sp|P15586|GNS_HUMAN	14.3929	14.6246	15.46	14.7315	14.1748	14.8099	14.0215	15.716	15.5719	14.3782	15.6185	15.1913	15.1539	15.6427	14.8865	14.7335	15.3122	14.2849	15.0506	13.9884	sp|P15586|GNS_HUMAN
sp|P15924|DESP_HUMAN	20.2917	19.531	22.2416	21.4677	21.7838	22.4151	19.9941	23.2298	22.9989	24.1464	20.8342	21.2289	21.418	21.6419	22.8224	22.8571	22.2315	22.0173	21.6885	22.3446	sp|P15924|DESP_HUMAN
sp|P16035|TIMP2_HUMAN	14.0878	13.5719	12.3816	13.4632	14.0149	12.6854	14.1915	14.8129	14.6827	13.7991	13.3406	13.2587	13.5445	13.1947	13.3242	13.6914	13.5365	13.8484	13.8069	13.4941	sp|P16035|TIMP2_HUMAN
sp|P16083|NQO2_HUMAN	12.9814	NA	14.7626	14.3049	NA	12.978	14.1874	13.7228	15.8297	16.0582	15.8596	15.0416	NA	16.0312	15.7801	13.1676	11.8249	13.253	12.7486	13.8323	sp|P16083|NQO2_HUMAN
sp|P16144|ITB4_HUMAN	12.4597	12.2307	NA	NA	11.7061	12.4168	NA	14.0633	13.8232	13.6087	12.8113	NA	12.343	13.093	12.8485	13.6116	13.3595	13.4137	11.5358	13.5611	sp|P16144|ITB4_HUMAN
sp|P16152|CBR1_HUMAN	12.1866	11.4947	11.9766	12.0795	11.5429	12.013	12.721	15.4199	12.2361	12.4699	11.9283	11.7399	12.6918	11.9055	12.1843	12.5616	12.1751	11.2556	10.7414	12.0461	sp|P16152|CBR1_HUMAN
sp|P16278|BGAL_HUMAN	17.0608	17.4409	17.0565	17.1189	16.8544	17.281	17.5859	17.2736	17.7446	17.2952	17.2656	17.4637	17.3439	17.33	17.6578	17.3878	17.2721	16.4874	17.4836	17.2533	sp|P16278|BGAL_HUMAN
sp|P16435|NCPR_HUMAN	NA	NA	NA	NA	NA	NA	NA	12.6386	11.4316	9.7158	NA	NA	9.65716	10.3803	NA	NA	NA	NA	NA	NA	sp|P16435|NCPR_HUMAN
sp|P16615|AT2A2_HUMAN	13.4875	13.2317	15.1664	13.4735	12.8247	13.9493	13.1006	16.1813	14.3528	NA	14.7216	15.0684	12.9041	13.1575	13.5314	14.504	15.2238	13.25	15.5591	14.3621	sp|P16615|AT2A2_HUMAN
sp|P16870|CBPE_HUMAN	15.9867	16.8213	14.9827	15.7568	13.0939	13.9054	16.756	14.4268	15.1067	15.197	13.4494	12.9931	13.1302	13.2219	14.6471	13.3675	13.6631	15.106	14.788	14.7314	sp|P16870|CBPE_HUMAN
sp|P16930|FAAA_HUMAN	13.8124	13.8963	14.5018	14.4937	14.2518	14.9866	13.5102	14.7213	15.3032	15.4176	14.8609	15.064	14.8471	15.9018	15.0455	15.3116	15.2007	14.3758	15.1249	15.1266	sp|P16930|FAAA_HUMAN
sp|P17050|NAGAB_HUMAN	16.2933	16.6799	16.2432	16.1454	16.3222	16.4264	16.1014	16.4473	16.5544	16.6763	16.1842	15.8567	16.3128	16.2007	15.9091	16.4986	16.4338	15.5442	16.371	16.5192	sp|P17050|NAGAB_HUMAN
sp|P17174|AATC_HUMAN	16.2131	16.4018	18.2633	17.9627	17.1185	17.898	16.7806	17.1593	18.7058	16.7556	16.9997	17.4341	17.1982	17.4204	18.4355	18.2685	17.2943	15.9353	17.5163	17.6994	sp|P17174|AATC_HUMAN
sp|P17405|ASM_HUMAN	14.3917	13.1082	13.484	14.787	13.8113	11.5492	14.0441	14.914	14.8334	15.5727	12.7188	12.3686	14.1435	14.2958	14.0103	13.6023	13.2209	13.4873	13.3076	13.2931	sp|P17405|ASM_HUMAN
sp|P17655|CAN2_HUMAN	NA	NA	NA	NA	NA	8.64236	NA	8.41501	10.5614	11.3228	NA	NA	NA	NA	10.7755	12.3348	NA	11.0637	NA	NA	sp|P17655|CAN2_HUMAN
sp|P17858|PFKAL_HUMAN	11.7853	NA	11.342	NA	10.6046	11.0639	10.3365	12.8728	11.5374	NA	NA	NA	NA	NA	10.3049	NA	NA	NA	10.5626	11.2687	sp|P17858|PFKAL_HUMAN
sp|P17900|SAP3_HUMAN	18.6838	18.9769	18.4287	18.515	18.3666	19.1116	19.0497	19.3859	19.3276	19.307	19.2039	18.7965	19.1693	18.8708	18.6752	18.8937	18.9978	19.3262	19.7416	19.2331	sp|P17900|SAP3_HUMAN
sp|P17931|LEG3_HUMAN	16.4665	15.8489	16.2336	16.3034	16.051	16.669	16.5266	17.5467	17.4966	17.3624	16.987	16.2773	16.9298	16.7197	16.5584	17.1617	16.6325	16.2622	16.3709	17.3638	sp|P17931|LEG3_HUMAN
sp|P17980|PRS6A_HUMAN	NA	NA	NA	NA	NA	NA	NA	13.8805	11.4697	NA	NA	NA	NA	NA	NA	NA	NA	NA	NA	NA	sp|P17980|PRS6A_HUMAN
sp|P17987|TCPA_HUMAN	NA	NA	NA	NA	NA	NA	NA	13.1592	11.9568	NA	NA	NA	NA	10.5812	NA	NA	NA	NA	NA	NA	sp|P17987|TCPA_HUMAN
sp|P18054|LOX12_HUMAN	NA	NA	12.9494	11.9712	11.3951	12.2707	NA	12.798	13.8622	10.7696	NA	11.757	11.1308	12.2288	13.3905	12.7595	NA	11.4466	11.9821	12.2981	sp|P18054|LOX12_HUMAN
sp|P18085|ARF4_HUMAN	13.2059	12.6512	12.6887	11.353	10.6295	11.933	12.9115	14.8924	12.6448	12.9818	13.3534	11.7237	11.6919	13.2012	13.0535	12.9127	13.0544	12.0151	13.5636	11.9028	sp|P18085|ARF4_HUMAN
sp|P18206|VINC_HUMAN	19.1592	18.9328	18.894	18.22	18.727	19.3347	18.4605	19.0528	18.6461	18.956	19.0292	18.5601	18.9938	18.682	18.7834	18.7892	18.9683	18.2553	18.474	18.4423	sp|P18206|VINC_HUMAN
sp|P18510|IL1RA_HUMAN	15.456	14.5617	12.9474	14.6568	13.5145	13.1495	13.2707	15.7984	14.8381	14.8444	15.6161	13.0282	13.4139	14.7137	14.7548	15.6727	13.5813	16.1714	14.0958	15.3337	sp|P18510|IL1RA_HUMAN
sp|P18583|SON_HUMAN	13.6037	13.6527	13.3838	13.2499	11.9067	13.4967	14.2616	13.187	13.9631	13.8263	13.5237	13.0664	11.9294	13.3689	13.4187	13.8201	12.1411	NA	13.4848	13.455	sp|P18583|SON_HUMAN
sp|P18669|PGAM1_HUMAN	11.723	NA	12.1094	12.1438	NA	NA	NA	14.1074	NA	NA	10.7638	NA	NA	NA	NA	NA	10.3162	NA	NA	12.3663	sp|P18669|PGAM1_HUMAN
sp|P19012|K1C15_HUMAN	17.6221	17.4975	17.2576	17.6	16.682	17.5546	17.7313	18.5484	18.5021	17.728	17.8493	18.2674	18.2083	18.0752	18.3666	18.1444	18.1751	19.2212	18.3899	18.0303	sp|P19012|K1C15_HUMAN
sp|P19013|K2C4_HUMAN	14.2375	13.0647	15.7508	13.2679	13.5533	13.363	14.0091	14.9982	14.7153	18.0448	15.1778	12.8622	12.7059	17.2933	14.1835	18.0841	13.5602	15.8071	15.7895	15.3425	sp|P19013|K2C4_HUMAN
sp|P19823|ITIH2_HUMAN	NA	NA	NA	9.59321	NA	12.5689	9.71532	11.917	12.2778	NA	NA	NA	8.69586	NA	NA	11.0053	NA	NA	NA	NA	sp|P19823|ITIH2_HUMAN
sp|P19827|ITIH1_HUMAN	NA	NA	NA	12.5689	NA	12.605	NA	12.3768	11.2282	NA	NA	NA	NA	NA	NA	10.4555	NA	NA	NA	NA	sp|P19827|ITIH1_HUMAN
sp|P19971|TYPH_HUMAN	11.8321	NA	12.2955	10.9198	14.3158	12.0676	12.4229	15.4454	13.9102	14.2977	12.3101	11.5148	13.6651	11.4351	11.9505	12.1883	14.7751	16.4099	14.1683	14.1538	sp|P19971|TYPH_HUMAN
sp|P20020|AT2B1_HUMAN	NA	NA	NA	NA	NA	NA	NA	11.7759	NA	NA	10.8536	NA	10.6573	NA	11.4064	10.0414	11.0333	10.7898	9.70243	NA	sp|P20020|AT2B1_HUMAN;sp|P23634|AT2B4_HUMAN
sp|P20036|DPA1_HUMAN	12.0888	10.4693	11.9641	NA	11.4313	11.68	NA	13.2632	10.6781	9.91376	12.1629	11.4778	10.9184	11.5683	11.0998	11.6898	12.797	12.6704	11.5512	11.7317	sp|P20036|DPA1_HUMAN
sp|P20073|ANXA7_HUMAN	15.7254	15.9347	16.002	15.9107	15.3094	16.0621	15.9763	16.4583	16.5857	16.8111	16.7311	15.7669	16.0835	16.4674	16.0946	16.9073	15.5165	15.8058	15.3109	16.2271	sp|P20073|ANXA7_HUMAN
sp|P20336|RAB3A_HUMAN	10.7302	10.6661	NA	10.8892	9.97929	NA	11.3127	11.958	11.7504	NA	10.4667	10.9675	NA	11.8025	11.174	11.6443	10.6252	NA	NA	11.5233	sp|P20336|RAB3A_HUMAN
sp|P20339|RAB5A_HUMAN	14.9148	14.5053	15.1865	14.4607	14.1866	14.6756	14.9375	15.228	15.2072	14.8691	14.847	14.3513	14.6911	14.6893	14.6837	15.0139	14.3548	14.1844	14.2389	15.1049	sp|P20339|RAB5A_HUMAN
sp|P20340|RAB6A_HUMAN	15.5466	13.9148	14.3628	15.402	14.3748	15.0573	15.2855	14.5151	15.38	14.8677	15.6826	14.4288	14.038	13.9958	14.6561	15.2481	13.0442	14.3874	14.0645	15.5153	sp|P20340|RAB6A_HUMAN
sp|P20618|PSB1_HUMAN	17.3237	17.6877	18.7594	18.3816	17.6706	17.9141	17.9886	18.8221	18.8057	17.4739	18.23	18.4141	18.2073	18.455	18.2322	17.5922	18.2366	18.0366	18.3033	18.0394	sp|P20618|PSB1_HUMAN
sp|P20645|MPRD_HUMAN	15.7042	14.0555	14.6438	14.762	14.9086	15.265	15.1918	15.7404	15.3659	14.9867	16.0448	14.7815	15.6201	15.3385	15.353	15.8422	15.5606	14.5667	15.2772	15.6128	sp|P20645|MPRD_HUMAN
sp|P20674|COX5A_HUMAN	NA	NA	11.5565	11.4588	NA	11.7436	NA	14.5049	14.2001	11.4475	NA	NA	11.1728	10.8228	12.8561	11.3859	11.6702	NA	10.955	11.8024	sp|P20674|COX5A_HUMAN
sp|P20810|ICAL_HUMAN	12.1544	10.9983	8.32084	9.31291	12.4767	11.6708	10.2438	13.2561	14.0687	10.0652	12.4378	NA	12.1933	12.6281	10.053	12.9046	11.3194	13.0535	13.1981	12.5567	sp|P20810|ICAL_HUMAN
sp|P20839|IMDH1_HUMAN	12.8066	13.9227	13.6928	16.8796	14.2476	14.1023	14.3208	13.4369	14.7176	13.9629	13.7139	14.2192	13.7033	13.7632	14.0252	13.3389	13.4792	12.6758	13.1316	13.9704	sp|P20839|IMDH1_HUMAN
sp|P20930|FILA_HUMAN	18.8907	19.0562	15.9092	18.6966	15.2356	15.4312	19.0953	14.8005	16.1723	13.5443	20.8873	17.6696	17.2856	19.488	15.5563	16.7353	15.3098	15.4374	16.6195	17.1638	sp|P20930|FILA_HUMAN
sp|P20933|ASPG_HUMAN	18.5362	18.2955	18.9834	18.2052	17.7244	18.7538	18.9446	18.9897	19.3543	19.3388	18.4102	18.4415	18.7138	17.5853	18.4149	18.4666	18.1878	18.3851	18.1773	18.8329	sp|P20933|ASPG_HUMAN
sp|P21128|ENDOU_HUMAN	NA	NA	NA	NA	NA	NA	11.7124	12.0154	NA	NA	NA	NA	NA	NA	NA	NA	NA	NA	NA	12.2342	sp|P21128|ENDOU_HUMAN
sp|P21266|GSTM3_HUMAN	NA	9.74134	NA	NA	NA	10.0167	NA	11.5954	10.6704	NA	10.5384	NA	NA	10.0608	NA	10.5457	10.0281	11.0763	10.6939	NA	sp|P21266|GSTM3_HUMAN
sp|P21281|VATB2_HUMAN	NA	NA	NA	NA	NA	NA	NA	13.6093	12.0336	NA	NA	NA	NA	NA	NA	NA	NA	NA	NA	NA	sp|P21281|VATB2_HUMAN
sp|P21333|FLNA_HUMAN	15.8902	15.2651	16.5176	17.5651	16.1303	16.9801	16.0085	16.9981	17.3472	16.9001	17.409	14.8829	17.1723	16.7766	17.3464	18.1728	17.2803	16.7912	17.6762	16.5448	sp|P21333|FLNA_HUMAN
sp|P21796|VDAC1_HUMAN	16.8349	16.1723	17.6792	16.8438	16.8809	17.1971	16.4881	16.4618	17.1207	15.6458	16.3073	15.8355	16.226	17.0377	17.1256	16.5022	15.6719	16.5733	15.9277	16.5249	sp|P21796|VDAC1_HUMAN
sp|P21964|COMT_HUMAN	NA	10.6105	9.66817	NA	NA	NA	NA	14.2329	12.6084	9.86475	11.025	NA	NA	NA	11.0371	11.2782	11.4344	11.3439	10.6345	NA	sp|P21964|COMT_HUMAN
sp|P22102|PUR2_HUMAN	15.4753	15.7386	15.7435	15.5544	15.892	15.9248	15.8024	15.5721	15.9203	15.6011	15.9398	15.6945	15.8063	16.089	15.6721	15.9529	15.9223	15.6166	15.999	15.6602	sp|P22102|PUR2_HUMAN
sp|P22234|PUR6_HUMAN	16.733	16.2153	16.7618	17.0381	16.1485	16.8644	16.6487	16.9098	17.772	16.7662	17.1499	17.2688	16.9751	17.1305	17.8567	17.4748	17.2443	17.2798	17.6077	17.2591	sp|P22234|PUR6_HUMAN
sp|P22304|IDS_HUMAN	17.8146	17.8004	17.3771	17.8211	17.114	17.9692	17.4793	18.2655	16.8963	17.4127	16.4854	17.0927	17.8288	17.3624	17.4263	17.9001	17.6018	16.1122	17.7255	17.5041	sp|P22304|IDS_HUMAN
sp|P22314|UBA1_HUMAN	11.6908	10.7145	11.6913	11.3968	11.0607	12.0418	12.1237	14.6617	12.8478	11.8617	11.8781	10.8157	11.2788	11.0864	11.7561	12.6796	11.7536	11.9575	11.5787	12.2536	sp|P22314|UBA1_HUMAN
sp|P22392|NDKB_HUMAN	13.1762	NA	13.5763	13.1421	13.7023	12.8965	12.9965	15.5958	16.0153	14.0178	14.2739	13.0042	15.1855	13.5303	14.4462	14.8432	13.2524	14.8681	13.8417	14.2385	sp|P22392|NDKB_HUMAN
sp|P22531|SPR2E_HUMAN	14.2493	14.2451	13.3084	12.8629	13.1465	14.5103	14.102	17.6495	13.5191	12.0333	9.0592	13.5837	12.5832	11.6242	11.3494	14.588	14.6972	15.4132	14.2365	14.7243	sp|P22531|SPR2E_HUMAN
sp|P22532|SPR2D_HUMAN	12.8156	14.4208	NA	NA	11.6178	11.5015	NA	16.6011	14.8597	NA	NA	NA	NA	NA	NA	13.7887	NA	14.0759	15.0451	NA	sp|P22532|SPR2D_HUMAN;sp|P35325|SPR2B_HUMAN
sp|P22626|ROA2_HUMAN	9.55203	NA	7.0204	NA	NA	9.17913	NA	12.4077	11.1121	9.60715	9.81885	8.33074	8.80222	NA	NA	NA	9.21056	8.52973	NA	NA	sp|P22626|ROA2_HUMAN
sp|P22695|QCR2_HUMAN	NA	NA	NA	NA	NA	NA	NA	12.4697	14.0721	NA	NA	NA	NA	NA	12.5943	11.1029	NA	NA	NA	NA	sp|P22695|QCR2_HUMAN
sp|P22735|TGM1_HUMAN	19.5379	19.5151	20.0359	19.535	19.6462	20.3719	20.3161	19.4076	20.2546	19.3854	18.7019	19.5648	19.6732	19.5391	20.082	19.6103	19.3778	18.7454	19.0581	19.2636	sp|P22735|TGM1_HUMAN
sp|P22760|AAAD_HUMAN	10.5466	9.68182	10.1859	10.3972	NA	11.026	NA	NA	11.6397	NA	11.9596	9.66827	11.3278	10.9919	12.1077	11.527	10.2823	10.1426	11.6728	11.3203	sp|P22760|AAAD_HUMAN
sp|P23219|PGH1_HUMAN	16.1309	14.9884	17.0559	15.9178	15.9806	17.1147	16.3138	15.9411	16.5335	15.9432	15.7828	15.9836	15.717	16.0208	16.9395	16.3327	15.8027	15.5262	16.4	17.0414	sp|P23219|PGH1_HUMAN
sp|P23280|CAH6_HUMAN	14.7972	13.9502	13.6203	14.9393	14.2949	13.108	15.4263	13.5905	12.7659	14.3449	13.6727	11.1544	12.853	12.2333	13.1644	12.0204	13.482	12.67	13.8268	13.2308	sp|P23280|CAH6_HUMAN
sp|P23284|PPIB_HUMAN	NA	NA	NA	NA	NA	NA	NA	12.9993	11.2936	NA	NA	NA	NA	NA	NA	NA	NA	NA	NA	11.4349	sp|P23284|PPIB_HUMAN
sp|P23396|RS3_HUMAN	12.4329	8.8271	9.3708	9.39748	10.1556	10.5103	8.35204	14.0828	9.94632	8.68069	8.35457	8.93122	8.96173	9.07096	8.78856	8.82283	9.23	10.765	8.96133	9.07785	sp|P23396|RS3_HUMAN
sp|P23490|LORI_HUMAN	13.5068	12.8654	13.9119	11.6648	13.3447	14.0016	10.509	14.9534	14.8588	15.0455	15.1818	13.4977	16.2482	15.7495	14.4386	15.3545	13.9471	12.0526	12.8872	15.2475	sp|P23490|LORI_HUMAN
sp|P23526|SAHH_HUMAN	14.8969	11.9847	15.0969	15.4202	15.6289	15.123	14.1351	15.3646	17.2839	16.5112	16.0147	14.44	16.0662	15.773	16.5502	16.1303	14.7006	16.5378	15.3244	15.3875	sp|P23526|SAHH_HUMAN
sp|P23528|COF1_HUMAN	14.4606	13.8565	14.0363	13.9973	13.4715	14.0639	14.2084	16.6055	15.1605	14.2983	14.1739	12.894	13.6404	13.0595	13.9528	14.7884	14.3344	14.8399	13.8734	13.4477	sp|P23528|COF1_HUMAN
sp|P24158|PRTN3_HUMAN	11.3835	NA	NA	9.95441	10.001	10.5082	10.5931	14.3676	10.3497	NA	NA	NA	NA	NA	NA	12.7851	NA	NA	NA	NA	sp|P24158|PRTN3_HUMAN
sp|P24298|ALAT1_HUMAN	15.1995	15.9744	16.1534	16.5357	15.8104	15.9325	15.3212	15.7625	16.4628	15.6145	16.1109	15.9984	15.5197	15.6779	16.804	15.5051	15.1725	15.0892	15.8202	15.0344	sp|P24298|ALAT1_HUMAN
sp|P24534|EF1B_HUMAN	10.3729	NA	NA	9.75788	NA	NA	11.3378	13.8602	12.5728	10.5156	NA	NA	10.1812	NA	NA	10.716	10.0156	11.6522	NA	10.3686	sp|P24534|EF1B_HUMAN
sp|P24666|PPAC_HUMAN	14.1268	13.047	14.6708	15.0345	14.1982	15.1526	13.429	14.7478	15.26	15.1442	14.9464	14.7347	15.0141	14.238	15.4291	15.2518	14.0053	13.829	14.5135	14.1734	sp|P24666|PPAC_HUMAN
sp|P24752|THIL_HUMAN	NA	NA	11.826	NA	NA	NA	NA	13.1681	10.682	NA	NA	NA	NA	11.1963	NA	NA	NA	NA	NA	NA	sp|P24752|THIL_HUMAN
sp|P25311|ZA2G_HUMAN	22.0731	22.8003	22.8829	23.3869	22.6624	23.2433	22.858	23.411	23.1301	23.3743	22.9062	22.9376	23.0447	23.1867	22.9502	22.7981	22.7342	22.1358	22.8459	22.2802	sp|P25311|ZA2G_HUMAN
sp|P25398|RS12_HUMAN	NA	NA	NA	NA	NA	NA	NA	12.2354	10.9862	NA	NA	NA	NA	NA	NA	NA	NA	NA	NA	NA	sp|P25398|RS12_HUMAN
sp|P25705|ATPA_HUMAN	12.8718	12.452	12.5705	13.0747	12.6218	12.5555	13.0822	14.8711	14.3014	12.1868	12.9379	12.4814	13.6939	13.7369	11.9673	12.7773	13.2249	12.426	12.1647	13.4372	sp|P25705|ATPA_HUMAN
sp|P25774|CATS_HUMAN	10.4102	NA	10.8963	9.73759	11.1276	9.08537	9.03981	11.442	10.1217	9.65998	8.68461	10.1592	10.2893	9.90436	9.98983	10.0982	NA	NA	11.0785	10.1133	sp|P25774|CATS_HUMAN
sp|P25786|PSA1_HUMAN	16.9076	17.2621	18.7011	18.5439	17.4926	18.3444	17.6149	18.7507	19.028	17.4583	18.5885	18.7949	18.1943	18.5497	18.6791	18.2794	18.3816	18.0398	18.4993	18.1815	sp|P25786|PSA1_HUMAN
sp|P25787|PSA2_HUMAN	17.3504	18.6202	19.4359	19.4604	19.1097	19.5121	19.0301	19.2905	19.7244	19.1304	19.3942	19.5946	19.4391	19.9902	19.9874	19.3581	19.7136	19.1931	19.8093	19.3941	sp|P25787|PSA2_HUMAN
sp|P25788|PSA3_HUMAN	18.4397	18.6554	19.3517	19.3639	19.4862	20.0979	19.1697	19.5659	19.9641	20.1355	19.6534	19.8716	19.5339	20.1424	19.468	19.6573	19.716	19.7869	19.777	20.1239	sp|P25788|PSA3_HUMAN
sp|P25789|PSA4_HUMAN	18.0362	17.7429	18.6714	19.1261	19.0516	19.1067	19.1352	19.3848	19.8743	19.7022	19.298	19.0694	18.6091	19.515	18.9324	19.2998	19.0925	19.1825	19.3596	19.5629	sp|P25789|PSA4_HUMAN
sp|P25815|S100P_HUMAN	18.9317	17.8517	19.7674	18.61	17.9108	16.8365	18.698	19.2042	20.6164	18.1886	16.5775	17.1047	19.2412	17.9288	16.6428	17.7027	17.7422	19.9307	18.1631	18.1666	sp|P25815|S100P_HUMAN
sp|P26196|DDX6_HUMAN	NA	NA	12.5303	NA	13.0016	12.0683	NA	11.9281	13.2619	NA	12.6677	NA	12.4667	12.9076	12.6352	12.8372	NA	13.2822	NA	12.6925	sp|P26196|DDX6_HUMAN
sp|P26447|S10A4_HUMAN	16.3714	15.8128	15.8699	16.4168	15.7901	16.2045	17.3603	16.4655	16.7738	16.9385	16.2754	15.3782	15.6814	14.9821	15.3044	15.9652	15.6644	15.8096	16.1424	15.4654	sp|P26447|S10A4_HUMAN
sp|P26599|PTBP1_HUMAN	12.6795	12.8811	12.3996	11.9989	12.7495	12.8367	11.9086	13.785	13.2171	13.4021	13.1334	12.1591	13.1841	12.9862	13.0906	12.7534	12.2289	12.8162	12.8059	13.0161	sp|P26599|PTBP1_HUMAN
sp|P26639|SYTC_HUMAN	NA	NA	NA	NA	NA	NA	NA	12.0585	12.7111	NA	NA	NA	NA	NA	NA	NA	NA	NA	NA	NA	sp|P26639|SYTC_HUMAN
sp|P26640|SYVC_HUMAN	NA	NA	NA	NA	NA	NA	NA	9.56677	NA	NA	NA	NA	NA	NA	NA	NA	NA	7.58809	NA	NA	sp|P26640|SYVC_HUMAN
sp|P26641|EF1G_HUMAN	12.2503	11.8715	12.4881	11.8111	11.9798	11.466	12.332	15.078	13.1374	12.3051	12.4172	11.133	12.2484	12.1453	12.0836	12.3723	11.6139	12.6619	11.5859	12.3645	sp|P26641|EF1G_HUMAN
sp|P27105|STOM_HUMAN	10.7972	8.85571	NA	NA	NA	10.8421	10.2978	12.1648	10.9996	9.96857	NA	NA	NA	NA	9.77964	11.131	9.81078	NA	9.62892	NA	sp|P27105|STOM_HUMAN
sp|P27348|1433T_HUMAN	10.6718	NA	NA	NA	NA	9.65731	10.4896	13.7227	11.8186	NA	9.16249	NA	14.9353	NA	NA	NA	9.96037	11.6868	10.7983	11.1813	sp|P27348|1433T_HUMAN
sp|P27449|VATL_HUMAN	14.2652	14.0444	12.9549	13.414	12.9327	13.4656	12.724	14.4797	14.5602	10.4461	14.1425	14.598	13.3312	13.4461	11.0138	12.8799	12.5007	13.1724	13.0922	13.5318	sp|P27449|VATL_HUMAN
sp|P27482|CALL3_HUMAN	14.6791	13.8338	15.1963	14.9552	15.436	15.5582	14.6802	16.7872	15.9528	15.9387	15.0256	14.9157	14.8411	15.0568	15.3818	15.3406	15.2297	15.979	15.7655	15.2929	sp|P27482|CALL3_HUMAN
sp|P27487|DPP4_HUMAN	13.0442	12.8121	12.3938	12.4147	11.1783	12.1126	13.1324	14.8098	14.4793	13.9403	12.9304	13.3856	14.1691	12.8986	13.5229	14.2179	14.182	12.5208	12.4185	13.0401	sp|P27487|DPP4_HUMAN
sp|P27824|CALX_HUMAN	15.4891	14.8673	15.5475	15.7223	15.278	15.4305	15.8859	15.9932	16.1474	15.5868	15.62	15.5128	15.6987	16.1501	15.0874	15.748	15.3888	14.9076	14.8481	15.7716	sp|P27824|CALX_HUMAN
sp|P27930|IL1R2_HUMAN	15.0179	14.9751	14.172	15.0914	13.4398	14.4154	15.2015	14.4625	14.9303	15.0299	15.1876	14.1131	15.046	14.9427	14.316	14.4958	15.0653	13.8099	15.1089	14.7439	sp|P27930|IL1R2_HUMAN
sp|P28062|PSB8_HUMAN	14.9377	15.5118	16.0931	15.4874	15.9031	16.5864	15.7615	16.6551	16.5256	16.5518	15.9066	15.029	16.3929	15.9956	16.3742	16.1181	16.3	15.8762	16.4145	16.1946	sp|P28062|PSB8_HUMAN
sp|P28065|PSB9_HUMAN	13.583	15.2083	15.959	15.1931	15.1492	15.8706	16.4215	16.1026	15.5499	16.1999	15.5563	16.0342	15.6559	15.5455	15.6215	15.5262	15.8594	15.786	15.6624	16.3092	sp|P28065|PSB9_HUMAN
sp|P28066|PSA5_HUMAN	18.2196	19.8215	20.0617	20.3286	20.5115	20.7184	19.9954	20.4812	20.857	20.7809	20.8613	20.8579	20.913	20.7773	20.6002	20.7596	20.6963	20.5324	20.7628	20.8698	sp|P28066|PSA5_HUMAN
sp|P28070|PSB4_HUMAN	17.572	17.7787	18.8224	18.1438	17.8088	18.295	18.2096	18.2254	18.6172	18.4422	18.3836	18.5447	18.3446	18.3772	18.6086	18.2658	18.2345	17.774	18.7583	18.4688	sp|P28070|PSB4_HUMAN
sp|P28072|PSB6_HUMAN	17.6331	18.5841	19.0203	18.8313	18.7956	19.5702	18.8479	18.9676	19.2214	19.186	19.4619	19.3316	19.4301	19.2763	19.1331	19.3097	19.1055	19.0909	19.0363	19.7323	sp|P28072|PSB6_HUMAN
sp|P28074|PSB5_HUMAN	16.0081	16.1445	16.852	16.6361	15.3684	16.0897	16.8874	17.261	16.7156	16.2378	16.1446	15.7635	16.1274	16.5536	15.8884	15.8904	16.0733	15.4308	16.1348	15.8751	sp|P28074|PSB5_HUMAN
sp|P28347|TEAD1_HUMAN	11.4326	10.13	10.7201	10.7435	10.4145	10.8352	11.665	11.1996	11.3452	10.6966	11.2968	9.92994	10.9709	11.9368	11.05	11.9021	10.714	9.74664	11.3284	11.4237	sp|P28347|TEAD1_HUMAN
sp|P28799|GRN_HUMAN	13.751	NA	NA	11.2289	NA	10.3337	12.7434	15.0842	12.9833	NA	11.0285	11.3612	12.4624	NA	12.0173	13.1657	13.1065	12.591	NA	NA	sp|P28799|GRN_HUMAN
sp|P29033|CXB2_HUMAN	10.6296	NA	NA	12.471	NA	11.7959	NA	11.918	11.0867	NA	12.0078	10.5398	NA	11.3814	11.4948	NA	11.0487	11.3334	12.0635	10.5178	sp|P29033|CXB2_HUMAN
sp|P29144|TPP2_HUMAN	NA	NA	NA	NA	NA	NA	NA	8.64364	9.50778	NA	NA	NA	NA	NA	10.2922	NA	NA	NA	NA	NA	sp|P29144|TPP2_HUMAN
sp|P29218|IMPA1_HUMAN	16.8351	15.4982	16.4075	16.6574	16.073	16.9409	16.6571	16.5893	16.9052	16.7886	16.5612	16.146	16.694	16.5272	16.7352	16.711	16.6926	16.3115	16.303	16.48	sp|P29218|IMPA1_HUMAN
sp|P29373|RABP2_HUMAN	12.8439	11.8719	13.5598	11.3476	11.67	12.5205	12.6492	13.3041	12.0503	11.8334	11.3957	11.1506	11.8405	12.4318	11.9055	12.1647	12.1165	11.7153	12.3851	12.4186	sp|P29373|RABP2_HUMAN
sp|P29401|TKT_HUMAN	14.5343	13.1544	16.8686	16.8083	15.2934	16.0156	14.2977	16.5189	18.573	16.39	16.2931	15.2948	16.909	16.4356	17.7869	17.2153	15.6807	16.3716	16.0946	16.282	sp|P29401|TKT_HUMAN
sp|P29508|SPB3_HUMAN	17.3021	17.9189	17.9597	16.524	17.952	17.1454	16.3736	18.5161	17.9918	16.9909	15.9285	16.1524	17.1977	17.0083	17.1663	17.7143	16.5708	19.376	17.7466	18.3771	sp|P29508|SPB3_HUMAN
sp|P30041|PRDX6_HUMAN	14.8381	14.6094	14.9498	14.4438	14.544	15.3319	15.127	17.1309	16.183	15.5897	15.195	14.5908	15.1564	14.8155	14.5933	14.8737	14.5293	16.094	14.5465	15.1299	sp|P30041|PRDX6_HUMAN
sp|P30043|BLVRB_HUMAN	NA	NA	NA	NA	NA	15.1635	11.4279	13.5653	13.1609	11.2863	NA	NA	NA	NA	11.6744	NA	NA	NA	NA	NA	sp|P30043|BLVRB_HUMAN
sp|P30044|PRDX5_HUMAN	10.6611	10.5433	NA	NA	NA	NA	10.7594	13.8406	12.9889	10.7461	NA	NA	10.0531	NA	10.42	10.5258	11.3689	10.8154	11.6506	NA	sp|P30044|PRDX5_HUMAN
sp|P30047|GFRP_HUMAN	15.1417	14.7349	15.4062	15.1138	14.5101	15.8814	15.7197	15.02	15.6336	16.2345	15.746	15.2099	14.5017	15.9407	15.1241	13.5792	14.794	14.2535	15.3028	15.4414	sp|P30047|GFRP_HUMAN
sp|P30048|PRDX3_HUMAN	17.1053	16.6924	18.024	18.2592	17.8382	17.6912	17.4559	18.1651	18.465	17.7582	17.4646	17.8706	18.521	18.5722	18.2699	18.6477	18.1408	17.841	18.485	18.7716	sp|P30048|PRDX3_HUMAN
sp|P30084|ECHM_HUMAN	NA	NA	11.2455	11.2462	NA	9.95361	NA	12.7826	12.751	NA	10.6237	NA	10.722	10.299	12.1012	11.4669	NA	9.97917	NA	11.0949	sp|P30084|ECHM_HUMAN
sp|P30085|KCY_HUMAN	12.0429	NA	NA	NA	NA	NA	10.9165	13.9278	12.4684	11.4621	NA	NA	NA	NA	NA	10.9928	NA	NA	NA	10.9073	sp|P30085|KCY_HUMAN
sp|P30086|PEBP1_HUMAN	15.4717	14.3246	15.5073	16.4295	16.6392	16.2768	15.5097	16.4845	18.5946	16.8063	17.7393	15.3629	16.1854	16.6694	17.3201	17.3869	15.7223	18.4974	16.883	16.2141	sp|P30086|PEBP1_HUMAN
sp|P30101|PDIA3_HUMAN	12.3538	11.6772	12.4219	11.9989	NA	12.1164	12.4213	15.3136	14.0231	NA	12.433	11.9453	12.5541	12.5775	11.9693	12.5027	12.8945	13.0506	12.6857	12.5115	sp|P30101|PDIA3_HUMAN
sp|P30153|2AAA_HUMAN	8.91109	10.1797	3.10261	NA	9.41827	26.2995	3.98052	13.9712	12.6479	7.01725	-63.5277	13.5122	10.3516	9.7997	12.1719	11.8939	11.072	9.51957	6.31001	9.69883	sp|P30153|2AAA_HUMAN
sp|P30504|1C04_HUMAN	14.2055	15.5118	14.8099	13.9528	13.1279	13.8517	15.0235	14.5584	13.04	13.4895	14.6564	14.8104	14.3249	15.4158	13.9792	13.6232	14.4829	12.725	13.578	13.2228	sp|P30504|1C04_HUMAN;sp|P30508|1C12_HUMAN;sp|P30510|1C14_HUMAN
sp|P30626|SORCN_HUMAN	14.0611	13.3249	14.7386	14.2333	13.6544	14.5907	13.5664	14.6774	15.5588	15.83	14.5105	14.3384	14.9764	15.4716	14.7393	15.4993	13.8896	14.0388	14.2978	15.266	sp|P30626|SORCN_HUMAN
sp|P30740|ILEU_HUMAN	15.165	15.1344	15.4206	14.7511	14.8203	16.1753	15.7024	16.904	16.6788	16.4161	15.2709	14.6879	15.1508	15.5116	14.4035	13.4878	12.6971	14.8536	14.6562	15.85	sp|P30740|ILEU_HUMAN
sp|P30838|AL3A1_HUMAN	NA	NA	NA	9.76422	NA	NA	NA	12.7405	13.1607	NA	NA	NA	NA	NA	9.15233	11.5979	NA	12.1672	9.43677	NA	sp|P30838|AL3A1_HUMAN
sp|P31025|LCN1_HUMAN	15.3115	11.8601	9.66439	14.7946	11.789	9.10059	14.5477	9.72138	12.3004	12.7735	9.84944	11.5074	12.304	9.49694	12.6368	16.4211	10.6047	14.0508	12.5144	13.3476	sp|P31025|LCN1_HUMAN
sp|P31150|GDIA_HUMAN	13.937	11.0099	15.3264	15.1714	14.4636	15.15	14.6097	13.6943	14.965	12.1864	12.2379	13.5753	11.3501	13.5397	15.826	14.9552	11.491	10.9081	12.5835	15.035	sp|P31150|GDIA_HUMAN
sp|P31151|S10A7_HUMAN	16.2605	16.8071	15.778	15.7341	16.2971	15.7249	15.5123	17.7379	16.0088	15.454	15.5074	15.6605	15.6387	15.2923	14.0072	15.4736	16.3076	18.6647	16.9579	17.3813	sp|P31151|S10A7_HUMAN
sp|P31483|TIA1_HUMAN	NA	11.98	13.8379	NA	NA	14.7992	12.5797	NA	11.2415	11.7546	14.5848	11.5907	NA	12.0268	12.1374	NA	NA	11.7591	13.6091	14.0499	sp|P31483|TIA1_HUMAN;sp|Q01085|TIAR_HUMAN
sp|P31930|QCR1_HUMAN	10.5701	9.72623	10.8683	11.0535	10.6315	10.7084	10.716	12.3521	13.4796	10.6657	11.9871	9.8556	9.94896	10.7584	11.9157	11.807	9.9384	9.6581	10.0793	11.0312	sp|P31930|QCR1_HUMAN
sp|P31937|3HIDH_HUMAN	NA	10.9509	12.1194	11.8781	11.3459	12.3276	NA	12.1774	13.0599	11.4377	11.8588	12.2993	12.6662	13.237	12.8323	12.7067	12.5874	10.6369	13.2664	13.2135	sp|P31937|3HIDH_HUMAN
sp|P31942|HNRH3_HUMAN	NA	NA	9.76148	NA	NA	NA	NA	11.7681	10.5863	NA	NA	NA	NA	NA	NA	NA	NA	NA	NA	NA	sp|P31942|HNRH3_HUMAN
sp|P31944|CASPE_HUMAN	23.1053	23.7127	24.1811	23.8737	24.15	24.4902	22.688	24.2452	24.8026	24.8011	24.4454	24.1593	24.8839	24.148	23.9917	24.1191	24.195	23.6791	24.1532	24.347	sp|P31944|CASPE_HUMAN
sp|P31946|1433B_HUMAN	12.3811	11.6424	11.331	12.1137	11.3306	11.8796	11.8622	14.4761	12.8227	11.9371	11.8534	10.6023	11.4208	10.677	11.2166	12.4146	11.8288	12.1095	11.7524	11.5968	sp|P31946|1433B_HUMAN
sp|P31947|1433S_HUMAN	13.1865	11.9142	12.4311	12.066	12.426	12.1062	13.1536	16.8114	14.2665	12.9317	12.7885	11.2027	12.5097	12.554	12.303	13.345	13.3082	13.9489	13.2783	13.5595	sp|P31947|1433S_HUMAN
sp|P31949|S10AB_HUMAN	16.9353	16.2628	16.5395	16.1118	16.3835	16.9651	17.0328	18.3904	17.2796	17.5063	16.5343	16.6195	17.0833	16.8506	16.8837	17.4017	16.8298	17.2089	16.7084	16.9901	sp|P31949|S10AB_HUMAN
sp|P32119|PRDX2_HUMAN	18.8727	18.5557	18.8187	18.8943	19.9845	19.5986	18.6796	20.1955	19.7511	21.1519	19.9136	18.5318	20.0874	19.3575	19.7099	19.3156	18.2492	20.5286	19.4391	18.8205	sp|P32119|PRDX2_HUMAN
sp|P32320|CDD_HUMAN	14.8991	16.7955	15.9544	15.0044	16.1563	16.5822	15.634	16.0925	14.381	14.5319	14.4732	13.988	14.6079	13.4561	15.558	15.4678	15.4546	14.2472	14.6679	16.5934	sp|P32320|CDD_HUMAN
sp|P32926|DSG3_HUMAN	10.7727	NA	NA	NA	NA	10.2828	NA	11.3666	NA	10.0724	NA	NA	NA	NA	NA	10.2146	9.82335	10.5183	10.1001	10.171	sp|P32926|DSG3_HUMAN
sp|P33121|ACSL1_HUMAN	NA	10.1769	11.7941	10.8628	10.0551	11.355	9.87301	11.488	12.7282	10.4922	10.3052	10.5615	10.6405	11.6152	11.4617	11.7719	10.6699	NA	11.7613	11.5703	sp|P33121|ACSL1_HUMAN
sp|P33176|KINH_HUMAN	NA	NA	12.8972	NA	NA	NA	10.3204	15.401	10.6108	12.6547	NA	NA	NA	13.231	NA	NA	NA	NA	NA	NA	sp|P33176|KINH_HUMAN
sp|P33764|S10A3_HUMAN	11.4631	13.358	11.3598	11.4689	13.245	12.2209	11.3781	14.1615	12.3343	9.57802	14.0088	11.1885	13.8337	12.6511	NA	14.5418	13.8557	15.0586	15.2623	12.6209	sp|P33764|S10A3_HUMAN
sp|P34059|GALNS_HUMAN	12.3791	13.3206	13.7004	12.8734	13.465	13.3943	13.1984	13.8163	13.6432	14.402	13.3208	13.3434	13.3298	13.1535	13.5898	13.3011	13.7313	12.3665	12.9272	13.5036	sp|P34059|GALNS_HUMAN
sp|P34932|HSP74_HUMAN	10.314	NA	10.6955	NA	10.7945	NA	10.2199	13.3719	11.8993	10.0002	10.9403	NA	NA	NA	NA	10.2162	NA	11.17	9.9199	NA	sp|P34932|HSP74_HUMAN
sp|P35052|GPC1_HUMAN	NA	NA	NA	11.3839	NA	NA	12.2969	NA	12.5848	12.5635	NA	9.56865	NA	10.8357	NA	NA	10.885	NA	NA	NA	sp|P35052|GPC1_HUMAN
sp|P35221|CTNA1_HUMAN	13.0339	NA	NA	NA	NA	11.2765	NA	13.2398	11.7604	NA	NA	NA	NA	NA	NA	NA	NA	NA	NA	NA	sp|P35221|CTNA1_HUMAN
sp|P35232|PHB_HUMAN	NA	11.1928	9.89437	11.6565	NA	12.3474	10.4961	14.2355	13.6836	NA	NA	11.6539	10.4303	10.0804	10.1268	10.7469	11.4288	13.2333	12.4761	10.7604	sp|P35232|PHB_HUMAN
sp|P35237|SPB6_HUMAN	19.0783	18.9201	19.0929	18.984	18.0419	18.3662	17.519	19.8749	17.7622	18.8896	18.3976	18.3086	17.7334	18.0305	15.7065	16.463	16.6972	17.4715	17.8169	17.6659	sp|P35237|SPB6_HUMAN
sp|P35268|RL22_HUMAN	NA	NA	NA	15.4215	NA	NA	NA	15.5733	14.5676	NA	NA	NA	NA	NA	NA	NA	NA	14.5572	NA	NA	sp|P35268|RL22_HUMAN
sp|P35270|SPRE_HUMAN	NA	NA	11.376	11.8659	11.1544	11.3183	11.5215	12.5831	12.2996	11.1241	11.0751	12.0614	12.5503	11.658	12.6469	11.7734	11.6559	11.9471	11.9963	12.2554	sp|P35270|SPRE_HUMAN
sp|P35321|SPR1A_HUMAN	NA	NA	NA	NA	NA	11.939	NA	14.3548	15.1274	12.101	NA	NA	11.7036	NA	NA	11.8789	NA	11.9612	10.8761	NA	sp|P35321|SPR1A_HUMAN
sp|P35475|IDUA_HUMAN	12.7142	12.4124	12.2955	12.9492	11.7833	12.7626	12.6028	12.9123	13.9473	12.8378	12.2798	13.0922	13.2498	13.461	13.1708	13.0139	12.4917	12.7418	12.336	11.5459	sp|P35475|IDUA_HUMAN
sp|P35527|K1C9_HUMAN	24.4654	22.0962	22.0997	23.3057	23.1321	22.6449	23.8537	22.7205	22.6317	24.6541	22.7716	23.149	23.0613	22.1173	24.1998	25.2411	23.6343	25.7769	25.218	24.7331	sp|P35527|K1C9_HUMAN
sp|P35573|GDE_HUMAN	13.6416	12.0463	14.411	13.7984	12.8591	14.6963	13.9877	12.9065	14.4139	12.9887	12.1749	13.6519	12.042	12.5448	14.5165	14.6192	11.0541	13.7105	12.4047	14.1889	sp|P35573|GDE_HUMAN
sp|P35579|MYH9_HUMAN	16.983	16.1325	16.5806	16.8067	16.7747	16.3334	16.2088	17.4235	17.7287	15.2618	18.3449	17.0878	17.3757	16.8348	18.2199	18.2889	16.1724	17.3855	17.3021	18.293	sp|P35579|MYH9_HUMAN
sp|P35606|COPB2_HUMAN	16.5044	16.1141	16.3578	16.6076	15.965	16.4009	16.3125	16.9905	16.9556	16.4884	16.474	16.239	16.1406	16.1078	16.8221	16.4755	16.5634	16.195	16.6397	16.0004	sp|P35606|COPB2_HUMAN
sp|P35754|GLRX1_HUMAN	19.2856	18.8413	17.6709	18.7108	18.6335	19.0565	17.9733	18.7081	18.5561	19.0335	19.5202	17.521	17.4935	18.1613	19.1976	19.1937	17.3863	20.1793	18.1837	18.9902	sp|P35754|GLRX1_HUMAN
sp|P35900|K1C20_HUMAN	15.6303	15.3076	14.9594	15.4148	15.2059	15.5108	14.0878	16.018	15.2387	15.1654	15.409	15.2632	14.9677	15.8708	15.865	15.4203	15.2475	16.0143	15.7555	16.1477	sp|P35900|K1C20_HUMAN
sp|P35908|K22E_HUMAN	29.6953	29.5899	29.5337	29.522	29.6518	29.5437	29.5565	29.7449	29.5842	29.2166	21.2203	29.386	29.4197	29.4577	29.3733	28.5528	29.6337	20.2236	29.447	28.999	sp|P35908|K22E_HUMAN
sp|P36222|CH3L1_HUMAN	14.4079	13.8659	15.1097	15.8268	15.133	14.076	14.5285	14.7287	15.971	14.4956	14.1907	14.2987	15.7384	15.727	16.2195	15.0638	13.5867	14.839	14.6514	13.7063	sp|P36222|CH3L1_HUMAN
sp|P36543|VATE1_HUMAN	NA	NA	NA	NA	NA	NA	12.6264	NA	12.7927	NA	NA	NA	NA	13.1839	NA	NA	NA	NA	NA	NA	sp|P36543|VATE1_HUMAN
sp|P36952|SPB5_HUMAN	15.5658	15.1963	15.3804	14.9081	14.5653	14.2626	15.2698	17.8616	16.9657	15.6319	15.5056	14.5782	15.2934	15.2497	14.3824	15.159	14.637	14.9769	14.8498	15.4199	sp|P36952|SPB5_HUMAN
sp|P36957|ODO2_HUMAN	13.6785	13.4742	13.8472	12.865	11.4331	12.0236	13.64	14.6276	13.4865	12.5035	13.0162	12.8478	13.7206	13.7117	13.012	13.6408	13.6599	12.2332	13.0865	11.8393	sp|P36957|ODO2_HUMAN
sp|P36969|GPX4_HUMAN	NA	NA	10.8855	10.7351	NA	NA	NA	11.1771	11.2374	NA	NA	NA	10.5864	NA	13.4498	9.96266	NA	NA	11.068	NA	sp|P36969|GPX4_HUMAN
sp|P37802|TAGL2_HUMAN	12.457	12.1309	11.9814	12.7271	NA	12.7152	12.2733	15.2063	13.3422	13.5118	12.0722	NA	12.2464	NA	12.1865	13.4036	12.6516	12.5705	12.6059	12.7085	sp|P37802|TAGL2_HUMAN
sp|P37837|TALDO_HUMAN	18.0555	18.2747	18.2532	18.4119	18.1591	18.4198	18.0672	18.8517	18.788	18.2054	18.4672	18.639	18.5189	18.7162	18.4303	18.6016	18.1465	17.7775	18.4182	18.6225	sp|P37837|TALDO_HUMAN
sp|P38606|VATA_HUMAN	NA	NA	12.026	12.761	13.2571	NA	11.4816	14.1493	13.3349	12.9981	13.342	12.1897	12.3246	11.0655	11.6792	10.868	12.4398	13.334	11.2361	NA	sp|P38606|VATA_HUMAN
sp|P38646|GRP75_HUMAN	13.6166	12.4577	NA	NA	12.7078	12.0372	12.7417	15.4395	13.1729	12.9955	12.744	NA	NA	12.7394	NA	13.2561	NA	13.9193	12.8868	12.852	sp|P38646|GRP75_HUMAN
sp|P39656|OST48_HUMAN	14.9975	14.6354	15.5242	15.8394	15.1633	15.5163	15.6626	15.6854	16.3823	15.2673	15.9368	15.2802	15.9624	16.5548	16.2442	16.3085	14.9895	15.2784	15.4212	16.0581	sp|P39656|OST48_HUMAN
sp|P40121|CAPG_HUMAN	10.9027	NA	NA	NA	NA	NA	NA	15.1698	12.6983	10.766	NA	NA	NA	NA	NA	11.065	NA	11.6535	10.7285	NA	sp|P40121|CAPG_HUMAN
sp|P40306|PSB10_HUMAN	NA	12.0355	13.7177	12.8366	12.845	13.1989	12.1808	13.8955	13.1206	13.4268	13.093	13.1702	12.64	13.6798	12.826	12.5652	13.1228	13.3787	12.678	13.035	sp|P40306|PSB10_HUMAN
sp|P40925|MDHC_HUMAN	NA	NA	10.0796	NA	NA	NA	NA	12.7465	12.864	10.3469	NA	NA	NA	NA	10.0433	10.9724	NA	10.6059	NA	NA	sp|P40925|MDHC_HUMAN
sp|P40926|MDHM_HUMAN	13.7742	12.9239	16.5733	17.9522	15.1778	15.9035	12.9975	17.4164	18.6393	16.7672	17.1826	15.7289	17.8465	18.0197	18.3467	17.8021	17.48	17.6681	18.4367	17.5886	sp|P40926|MDHM_HUMAN
sp|P40939|ECHA_HUMAN	NA	NA	NA	NA	NA	NA	NA	12.9626	10.5335	NA	NA	NA	NA	NA	NA	NA	NA	NA	NA	NA	sp|P40939|ECHA_HUMAN
sp|P40967|PMEL_HUMAN	10.8428	NA	NA	12.6299	NA	12.0483	NA	12.5618	12.5529	NA	NA	NA	NA	NA	NA	NA	NA	12.6741	NA	NA	sp|P40967|PMEL_HUMAN
sp|P42357|HUTH_HUMAN	16.128	16.4232	19.812	18.3159	18.0887	18.6981	17.9797	19.0918	20.3336	19.0368	18.1536	18.597	18.6258	19.1371	20.1115	18.35	19.4417	18.4219	18.941	18.5278	sp|P42357|HUTH_HUMAN
sp|P42785|PCP_HUMAN	18.4211	18.3004	18.5776	18.2664	18.1966	18.8003	18.3539	19.1697	18.8276	18.9173	18.4342	18.3742	18.7798	18.6182	18.6534	18.4988	18.6514	17.9059	18.8196	19.0095	sp|P42785|PCP_HUMAN
sp|P43034|LIS1_HUMAN	11.6276	8.87857	8.30587	9.33911	11.2855	9.88587	8.90662	12.0179	12.428	10.7018	10.6947	10.4351	12.3073	10.515	10.8512	12.2843	10.372	10.2528	10.0198	11.6278	sp|P43034|LIS1_HUMAN
sp|P43251|BTD_HUMAN	NA	NA	11.357	11.1313	13.1537	10.977	11.5392	12.392	12.6889	10.7457	NA	NA	NA	NA	10.7499	10.7432	NA	12.2856	NA	11.448	sp|P43251|BTD_HUMAN
sp|P43304|GPDM_HUMAN	NA	NA	11.7449	NA	NA	NA	NA	12.6106	12.2223	NA	NA	NA	NA	NA	9.92971	NA	NA	NA	NA	NA	sp|P43304|GPDM_HUMAN
sp|P43307|SSRA_HUMAN	19.3545	19.1416	18.8909	18.9003	18.8501	18.7157	19.1339	19.0944	19.143	19.2418	19.0189	18.9174	18.9484	19.0485	18.9029	18.7613	18.6544	18.9384	18.7407	18.9156	sp|P43307|SSRA_HUMAN
sp|P43490|NAMPT_HUMAN	NA	NA	NA	NA	NA	NA	11.0434	13.489	11.7726	NA	NA	NA	NA	NA	NA	NA	NA	NA	NA	10.3237	sp|P43490|NAMPT_HUMAN
sp|P43686|PRS6B_HUMAN	10.7826	NA	10.7645	NA	10.5912	11.6041	NA	12.9072	12.7488	10.4078	10.3521	9.29856	10.6405	10.8958	12.7321	13.6771	NA	10.4725	NA	12.6167	sp|P43686|PRS6B_HUMAN
sp|P45880|VDAC2_HUMAN	15.8857	15.1258	16.3529	15.6646	16.4522	16.6619	15.3833	15.8815	16.2818	14.4194	15.1057	14.9309	15.1878	16.1064	16.4979	16.1081	14.8776	15.6366	15.2422	15.8511	sp|P45880|VDAC2_HUMAN
sp|P45974|UBP5_HUMAN	13.1431	12.6564	12.9525	13.4788	12.0565	12.5788	13.7657	15.1232	13.5446	12.4183	12.8593	11.8162	12.9263	12.8994	12.2059	12.9567	12.8966	13.0863	12.6338	12.7278	sp|P45974|UBP5_HUMAN
sp|P46459|NSF_HUMAN	NA	NA	NA	NA	NA	9.86935	NA	11.5382	11.1709	NA	9.81093	NA	NA	NA	11.2627	10.5745	NA	12.7791	NA	NA	sp|P46459|NSF_HUMAN
sp|P46736|BRCC3_HUMAN	10.3066	9.83546	12.1864	12.2375	10.941	12.5042	10.0592	10.6922	12.3102	10.9236	12.4102	12.1195	12.7749	12.6136	12.6504	12.7142	12.2847	10.9783	11.4335	12.2547	sp|P46736|BRCC3_HUMAN
sp|P46782|RS5_HUMAN	NA	NA	NA	NA	NA	NA	NA	11.7055	9.81005	NA	NA	NA	NA	NA	NA	NA	NA	NA	NA	NA	sp|P46782|RS5_HUMAN
sp|P46926|GNPI1_HUMAN	15.1522	14.1841	16.6756	15.7514	14.667	15.9417	14.5661	15.6426	15.7763	15.3807	15.4207	15.0991	14.7862	15.4412	15.7641	15.439	15.3172	15.3847	15.6411	15.3984	sp|P46926|GNPI1_HUMAN
sp|P46940|IQGA1_HUMAN	NA	NA	NA	NA	NA	NA	NA	14.8718	NA	NA	NA	NA	NA	NA	NA	NA	NA	13.5084	NA	10.8748	sp|P46940|IQGA1_HUMAN
sp|P46977|STT3A_HUMAN	14.3247	14.7496	14.8778	15.2255	14.9399	15.0649	14.8151	15.1862	15.5622	13.9831	15.3954	15.0615	15.0928	15.437	15.6468	14.9112	14.4518	14.6403	15.5722	15.105	sp|P46977|STT3A_HUMAN
sp|P47755|CAZA2_HUMAN	NA	NA	NA	11.1338	NA	NA	11.1278	14.6647	12.8122	NA	NA	NA	NA	NA	NA	NA	NA	12.2017	11.2135	11.9239	sp|P47755|CAZA2_HUMAN
sp|P47756|CAPZB_HUMAN	13.9548	11.9494	13.0422	12.3821	13.5388	12.5934	13.3387	15.569	13.9734	14.072	12.6176	10.9271	11.1904	12.8455	13.7249	14.4305	13.1636	14.4829	13.923	14.179	sp|P47756|CAPZB_HUMAN
sp|P47895|AL1A3_HUMAN	NA	NA	NA	NA	NA	12.2159	NA	11.1467	NA	NA	NA	NA	NA	NA	NA	NA	NA	NA	NA	NA	sp|P47895|AL1A3_HUMAN
sp|P47897|SYQ_HUMAN	NA	NA	NA	NA	NA	NA	NA	11.7107	9.7144	NA	NA	NA	NA	NA	NA	NA	NA	9.75337	NA	NA	sp|P47897|SYQ_HUMAN
sp|P47929|LEG7_HUMAN	20.1734	19.2477	19.549	19.1234	19.2904	19.3382	19.7361	22.546	20.6687	20.2516	19.3531	18.7201	19.6815	19.4915	19.3618	20.1391	19.4054	20.0905	19.1376	19.7853	sp|P47929|LEG7_HUMAN
sp|P48147|PPCE_HUMAN	NA	NA	NA	NA	NA	NA	NA	13.2402	11.8686	10.7364	10.1675	NA	NA	NA	NA	11.0026	NA	10.9894	NA	NA	sp|P48147|PPCE_HUMAN
sp|P48163|MAOX_HUMAN	16.5836	17.1484	19.1626	18.9069	18.5012	18.1508	17.0586	18.5209	19.8355	17.9828	19.1226	18.004	18.4582	19.2253	18.9896	18.8285	17.6259	17.7098	18.3556	18.9288	sp|P48163|MAOX_HUMAN
sp|P48444|COPD_HUMAN	NA	NA	NA	NA	NA	NA	NA	12.7229	10.2062	NA	NA	NA	NA	NA	NA	NA	NA	NA	NA	NA	sp|P48444|COPD_HUMAN
sp|P48449|ERG7_HUMAN	NA	13.0254	11.6475	11.9007	12.2223	11.3086	10.7341	13.0963	13.9796	11.2532	12.5808	13.5249	12.7655	12.9836	13.0532	13.1729	12.4384	12.635	12.5072	12.1487	sp|P48449|ERG7_HUMAN
sp|P48594|SPB4_HUMAN	18.5402	18.8713	19.2875	18.0385	19.076	18.6199	17.9542	20.792	19.7126	18.8073	18.3364	17.0657	18.4092	18.651	18.7519	19.409	18.8244	20.3088	19.1283	19.8396	sp|P48594|SPB4_HUMAN
sp|P48595|SPB10_HUMAN	NA	NA	NA	NA	NA	NA	8.41941	NA	NA	11.2184	NA	NA	10.737	NA	10.5017	NA	NA	9.18289	8.61621	NA	sp|P48595|SPB10_HUMAN
sp|P48637|GSHB_HUMAN	18.3204	18.7064	18.7769	18.3284	18.6171	19.0222	18.7382	18.4444	18.8046	18.7979	18.1644	18.471	18.6405	18.6954	18.5241	18.6248	18.6756	17.9514	18.4085	18.6701	sp|P48637|GSHB_HUMAN
sp|P48651|PTSS1_HUMAN	13.0297	14.1806	12.9191	14.7746	12.8709	13.3992	13.3468	14.3488	14.7731	NA	14.0346	13.9283	13.1854	14.341	14.246	13.463	13.6043	13.4193	14.3263	13.5095	sp|P48651|PTSS1_HUMAN
sp|P48668|K2C6C_HUMAN	12.1005	13.0293	13.1909	13.4676	13.0564	13.4553	13.5446	16.2064	14.9547	14.2892	13.1422	12.8892	13.6645	12.8956	12.9647	12.4569	13.7272	14.5755	13.8568	12.7479	sp|P48668|K2C6C_HUMAN
sp|P49189|AL9A1_HUMAN	12.7096	NA	11.5726	NA	NA	NA	NA	12.5274	11.5253	11.2667	11.5026	10.9208	11.0294	NA	11.5631	12.836	11.7773	14.0318	12.4534	15.9591	sp|P49189|AL9A1_HUMAN
sp|P49247|RPIA_HUMAN	16.0296	15.3226	15.6433	15.0468	14.9726	15.3742	15.6607	15.9532	15.7988	16.0636	15.6418	15.1617	15.0651	15.3485	15.3095	15.0879	15.0985	14.946	15.5572	15.2675	sp|P49247|RPIA_HUMAN
sp|P49327|FAS_HUMAN	NA	NA	NA	NA	10.9314	NA	NA	15.3862	13.1069	11.9682	NA	12.3296	NA	11.0525	NA	11.7172	11.1544	11.4921	NA	11.5021	sp|P49327|FAS_HUMAN
sp|P49368|TCPG_HUMAN	NA	9.27415	NA	NA	NA	NA	NA	13.4685	11.8064	NA	NA	NA	NA	9.1473	NA	NA	NA	9.08191	9.11142	NA	sp|P49368|TCPG_HUMAN
sp|P49419|AL7A1_HUMAN	17.6819	18.3602	18.6175	18.712	18.415	18.7407	18.5637	18.3654	19.1366	18.8323	18.3948	18.7612	18.4556	18.8484	18.7424	18.281	19.0559	18.5081	18.3654	18.6535	sp|P49419|AL7A1_HUMAN
sp|P49589|SYCC_HUMAN	NA	NA	NA	NA	NA	NA	NA	12.4199	NA	NA	NA	NA	NA	NA	8.79077	7.41741	NA	NA	NA	NA	sp|P49589|SYCC_HUMAN
sp|P49590|SYHM_HUMAN	13.3869	11.0655	12.044	13.714	14.3199	13.4012	11.7004	14.2622	16.7074	13.1178	14.657	13.63	14.0939	15.837	13.7363	15.846	14.3854	13.1982	15.0371	16.2866	sp|P49590|SYHM_HUMAN
sp|P49720|PSB3_HUMAN	18.4124	18.7568	19.4947	19.4991	18.8688	19.1668	19.5571	19.659	19.571	18.8267	19.0683	19.2292	19.1785	19.51	19.4012	19.1366	19.0652	18.8481	19.3973	18.8853	sp|P49720|PSB3_HUMAN
sp|P49721|PSB2_HUMAN	18.9828	19.8143	20.3651	20.2576	19.8639	20.7063	20.0712	20.6308	20.4526	20.2642	20.4743	20.5954	20.5269	20.5453	20.3803	20.227	20.3421	20.1759	20.4452	20.1995	sp|P49721|PSB2_HUMAN
sp|P49748|ACADV_HUMAN	13.3462	12.9345	12.4463	11.2752	12.6622	12.7412	12.9424	14.3849	15.4251	13.318	14.7959	12.3888	12.7654	11.682	12.4174	13.6924	NA	13.9858	13.2764	12.0494	sp|P49748|ACADV_HUMAN
sp|P49754|VPS41_HUMAN	NA	NA	NA	NA	7.9117	NA	NA	NA	NA	NA	9.21295	NA	7.85347	9.35526	NA	NA	8.1245	9.51126	8.47733	NA	sp|P49754|VPS41_HUMAN
sp|P49755|TMEDA_HUMAN	17.3349	16.8643	16.5354	17.0046	16.663	17.0498	17.2105	16.9734	17.3453	16.6022	17.5328	17.4814	17.3845	17.8463	17.6235	17.6397	17.1396	17.0124	16.9242	17.3707	sp|P49755|TMEDA_HUMAN
sp|P49862|KLK7_HUMAN	16.051	14.9565	15.4298	15.9185	14.8466	15.2255	14.5885	16.7391	16.6553	15.55	15.9602	14.8774	15.8226	16.5895	15.8195	15.6152	15.0915	15.1536	14.7973	14.4598	sp|P49862|KLK7_HUMAN
sp|P49903|SPS1_HUMAN	NA	NA	NA	NA	NA	NA	NA	11.927	11.4802	11.4548	11.1477	NA	NA	NA	NA	13.8461	NA	12.0569	NA	NA	sp|P49903|SPS1_HUMAN
sp|P50053|KHK_HUMAN	NA	NA	NA	NA	NA	12.915	14.0574	NA	NA	NA	12.895	NA	NA	13.4047	13.5356	12.4667	NA	NA	NA	NA	sp|P50053|KHK_HUMAN
sp|P50395|GDIB_HUMAN	16.0625	14.2541	18.6011	17.9416	17.0605	18.0529	16.1114	16.9445	18.5752	16.1069	15.9188	15.409	15.0746	16.6811	19.0126	18.1912	14.8049	16.0866	15.8288	17.1073	sp|P50395|GDIB_HUMAN
sp|P50452|SPB8_HUMAN	18.164	19.1452	19.8078	18.9794	19.8477	19.9972	18.9827	20.106	20.3182	18.5266	17.8426	19.5862	19.6849	19.7791	18.1441	19.9166	17.3529	18.1142	19.5465	20.7283	sp|P50452|SPB8_HUMAN
sp|P50453|SPB9_HUMAN	NA	11.8092	13.6156	10.3969	11.5276	10.0681	NA	10.2164	12.2391	10.2881	10.378	NA	11.3928	9.62054	10.4777	NA	NA	11.8337	NA	11.4854	sp|P50453|SPB9_HUMAN
sp|P50552|VASP_HUMAN	10.4694	NA	11.3203	12.2094	12.1891	11.0001	9.74857	12.7234	13.4069	12.1587	12.8036	12.3148	12.9959	12.5018	13.3908	13.4162	12.3298	11.3743	12.5724	13.3867	sp|P50552|VASP_HUMAN
sp|P50570|DYN2_HUMAN	9.28509	NA	11.3503	NA	10.9017	11.1892	NA	13.3011	11.4814	NA	NA	NA	11.8951	NA	NA	11.4164	NA	NA	10.9193	10.8881	sp|P50570|DYN2_HUMAN
sp|P50579|MAP2_HUMAN	12.2883	12.4238	13.1239	13.5835	13.8145	13.4057	12.9214	13.8079	14.7166	13.2951	14.2002	13.4366	13.9126	13.9187	13.6006	14.2648	13.4742	13.9746	13.6882	13.7702	sp|P50579|MAP2_HUMAN
sp|P50897|PPT1_HUMAN	14.0952	13.4697	13.2306	13.1338	12.0915	13.7692	13.483	14.8926	14.2475	14.2388	14.3449	12.4807	14.6178	13.3275	12.802	13.3836	14.1645	14.7573	14.2535	13.7404	sp|P50897|PPT1_HUMAN
sp|P50990|TCPQ_HUMAN	NA	NA	NA	NA	NA	NA	NA	14.0447	12.2932	12.2198	11.495	NA	NA	NA	NA	11.4053	11.9398	11.9034	NA	11.6751	sp|P50990|TCPQ_HUMAN
sp|P50991|TCPD_HUMAN	NA	NA	NA	NA	12.9757	NA	NA	NA	NA	NA	NA	NA	NA	NA	14.1117	NA	NA	NA	NA	NA	sp|P50991|TCPD_HUMAN
sp|P50995|ANX11_HUMAN	15.7947	15.6417	16.6476	16.1929	16.1387	16.4835	15.8032	16.1271	17.0634	16.8259	16.9704	16.0444	16.6058	17.1821	16.498	17.6657	15.7774	15.9828	15.5478	16.4541	sp|P50995|ANX11_HUMAN
sp|P51148|RAB5C_HUMAN	9.65671	8.78954	9.49237	9.42945	NA	9.8974	10.1558	11.5139	10.5102	9.48732	9.62827	8.68966	NA	9.90635	NA	9.35729	NA	8.68575	8.71666	9.52602	sp|P51148|RAB5C_HUMAN
sp|P51149|RAB7A_HUMAN	14.491	13.8972	13.7545	14.3276	13.6867	13.8178	14.508	15.6644	14.7754	14.1473	14.637	14.1575	14.4287	14.2332	13.856	14.1566	14.1711	14.6038	14.0594	14.3179	sp|P51149|RAB7A_HUMAN
sp|P51151|RAB9A_HUMAN	13.6958	13.5368	13.0453	NA	12.9971	12.8222	13.9567	14.5247	15.1217	14.6775	13.8199	9.95634	13.8548	13.505	13.8838	11.6702	13.7693	12.4809	14.1106	13.5874	sp|P51151|RAB9A_HUMAN
sp|P51571|SSRD_HUMAN	18.2918	18.0646	18.7425	18.625	18.7554	18.5197	18.5622	18.9613	19.27	18.9388	18.4573	18.7988	18.8274	18.8413	19.0944	18.9931	18.5932	18.6992	19.2657	18.9418	sp|P51571|SSRD_HUMAN
sp|P51572|BAP31_HUMAN	14.1098	14.9821	13.86	14.0887	12.8933	14.4851	13.5316	13.9353	15.3312	NA	13.3826	14.4357	14.3058	14.7936	13.3779	13.421	12.5951	13.6085	13.3719	13.4236	sp|P51572|BAP31_HUMAN
sp|P51610|HCFC1_HUMAN	NA	NA	NA	NA	NA	NA	NA	8.88378	9.29142	NA	9.64477	NA	7.7098	NA	9.05323	8.48024	NA	8.95006	8.61157	9.13949	sp|P51610|HCFC1_HUMAN
sp|P51648|AL3A2_HUMAN	12.5844	12.6514	14.6231	14.8169	13.5418	14.2396	13.4053	14.1267	15.5166	13.3388	13.5616	13.7939	13.8412	14.1209	14.396	14.4134	13.3657	14.0072	13.7663	13.9563	sp|P51648|AL3A2_HUMAN
sp|P51659|DHB4_HUMAN	16.5435	16.597	17.9166	15.604	16.1564	18.0747	15.234	16.7823	16.7415	16.0961	16.5669	16.909	15.7788	17.6029	15.4309	16.6942	16.9505	15.2234	16.7682	15.9198	sp|P51659|DHB4_HUMAN
sp|P51688|SPHM_HUMAN	16.8883	17.2862	17.6649	17.2727	16.5708	17.3405	16.4246	17.1255	17.9589	17.1846	17.966	17.4148	17.6556	18.0484	17.8025	16.9601	17.3877	16.0402	17.5853	17.1221	sp|P51688|SPHM_HUMAN
sp|P51991|ROA3_HUMAN	NA	NA	NA	NA	NA	NA	11.8724	13.6082	12.2934	NA	NA	NA	NA	NA	NA	NA	NA	11.7911	NA	NA	sp|P51991|ROA3_HUMAN
sp|P52209|6PGD_HUMAN	NA	NA	NA	NA	NA	NA	NA	13.2468	12.0532	NA	NA	NA	NA	NA	NA	12.0118	NA	11.6996	NA	NA	sp|P52209|6PGD_HUMAN
sp|P52565|GDIR1_HUMAN	NA	NA	11.5287	NA	NA	NA	NA	13.9589	NA	NA	NA	NA	NA	NA	NA	NA	NA	NA	NA	11.5355	sp|P52565|GDIR1_HUMAN
sp|P52566|GDIR2_HUMAN	10.5188	NA	NA	NA	NA	NA	NA	13.9916	NA	NA	NA	NA	NA	NA	NA	12.4562	NA	NA	NA	10.018	sp|P52566|GDIR2_HUMAN
sp|P52655|TF2AA_HUMAN	15.3184	15.2707	14.8168	15.5553	15.2455	15.6668	14.9314	15.2725	14.9995	16.1485	15.7136	15.0813	15.5911	15.391	15.6197	15.3942	15.4725	15.0446	15.7078	15.5506	sp|P52655|TF2AA_HUMAN
sp|P52657|T2AG_HUMAN	NA	13.5753	NA	13.8788	NA	NA	14.4473	NA	13.7688	13.9461	13.8639	13.8417	14.2077	14.4664	15.0318	13.7011	14.2895	NA	14.6938	14.4145	sp|P52657|T2AG_HUMAN
sp|P52758|RIDA_HUMAN	13.8644	13.7046	13.7138	13.7205	13.376	13.4549	13.1339	14.2664	14.1713	13.6683	13.4234	13.3673	13.8487	13.8591	13.3799	13.7455	13.4879	12.6677	13.7174	13.5077	sp|P52758|RIDA_HUMAN
sp|P52888|THOP1_HUMAN	10.5313	NA	11.0994	NA	10.8678	NA	NA	NA	14.8765	13.1355	10.1269	NA	NA	NA	12.8015	11.5571	NA	12.722	9.55808	9.74709	sp|P52888|THOP1_HUMAN
sp|P52907|CAZA1_HUMAN	12.4199	11.3947	11.4411	11.9438	11.5597	11.6443	12.3059	14.985	13.6786	12.749	12.7642	11.0696	11.7794	11.3964	12.086	12.666	11.7641	12.8808	12.4693	12.5015	sp|P52907|CAZA1_HUMAN
sp|P53004|BIEA_HUMAN	11.0879	NA	8.6013	NA	NA	NA	NA	10.537	11.6378	NA	NA	NA	NA	NA	NA	NA	NA	NA	NA	NA	sp|P53004|BIEA_HUMAN
sp|P53396|ACLY_HUMAN	NA	NA	13.0814	10.3657	11.1419	12.2072	NA	10.9385	12.7242	11.3159	NA	NA	NA	NA	12.7863	9.67802	NA	NA	NA	NA	sp|P53396|ACLY_HUMAN
sp|P53634|CATC_HUMAN	16.8346	17.5325	17.3306	16.7054	16.5508	17.2932	16.6062	17.7169	16.7507	17.1286	16.4111	16.9313	17.2328	16.7812	16.844	16.968	17.4223	17.0661	17.2365	17.7504	sp|P53634|CATC_HUMAN
sp|P54136|SYRC_HUMAN	10.4928	NA	11.0048	NA	NA	10.1763	NA	13.6542	12.1693	11.0191	NA	10.5308	10.7178	10.4903	9.42188	9.96384	NA	11.5149	9.76441	11.7207	sp|P54136|SYRC_HUMAN
sp|P54652|HSP72_HUMAN	16.3328	16.7421	16.4343	16.7242	17.1011	17.2901	16.1922	14.1713	14.8452	13.4863	16.3584	15.4175	14.3461	16.1205	16.8911	16.8691	13.9801	14.5825	14.7825	16.5549	sp|P54652|HSP72_HUMAN
sp|P54727|RD23B_HUMAN	NA	NA	NA	10.8697	NA	10.7056	10.6646	13.2631	11.0719	10.7011	NA	NA	11.113	10.34	NA	NA	10.0969	NA	NA	10.684	sp|P54727|RD23B_HUMAN
sp|P54793|ARSF_HUMAN	14.8297	15.3555	15.2147	13.9696	13.8191	14.9024	14.8057	14.8899	12.7924	12.0428	13.4273	14.614	13.4688	14.6224	13.9099	14.3555	14.2144	13.9044	13.9793	14.701	sp|P54793|ARSF_HUMAN
sp|P54802|ANAG_HUMAN	11.8433	12.7274	11.4483	12.1748	10.3695	11.4613	11.0677	12.6831	12.5449	NA	11.2845	11.7721	11.965	11.4546	12.2944	11.2602	11.732	11.3171	12.2422	10.8053	sp|P54802|ANAG_HUMAN
sp|P54803|GALC_HUMAN	NA	15.274	15.6834	15.9161	15.536	15.5284	13.8584	16.3837	11.8216	15.4407	16.0612	15.0473	16.3393	15.226	15.9992	16.1949	16.0571	15.46	15.7439	15.0569	sp|P54803|GALC_HUMAN
sp|P54920|SNAA_HUMAN	12.5714	12.5097	12.6888	12.4898	12.4884	13.3032	12.4361	14.5173	13.219	12.9015	12.3233	12.1991	12.8692	13.2225	13.0577	12.5285	12.9836	13.1696	12.8806	13.0309	sp|P54920|SNAA_HUMAN
sp|P55000|SLUR1_HUMAN	13.5478	12.3823	8.74668	12.7087	12.171	10.7015	12.4887	14.6365	11.5929	11.6477	11.1257	10.093	11.8873	10.8895	11.2126	12.2686	11.4608	11.418	12.0045	10.7882	sp|P55000|SLUR1_HUMAN
sp|P55072|TERA_HUMAN	12.9908	NA	14.9331	14.5005	13.407	15.1981	10.7374	15.9889	15.1635	12.5362	11.2224	10.3584	10.8143	10.8568	14.2091	12.2114	12.7786	13.3529	12.4388	13.1446	sp|P55072|TERA_HUMAN
sp|P55145|MANF_HUMAN	14.5272	14.0002	13.2845	13.5516	13.7596	13.1421	13.0777	14.9747	14.384	13.2015	14.8169	13.7546	14.3824	14.1747	13.3288	13.6091	13.0531	12.6333	13.9233	14.8958	sp|P55145|MANF_HUMAN
sp|P55199|ELL_HUMAN	13.2411	12.082	13.1847	13.4464	13.5355	14.6018	13.539	13.2857	14.2241	13.4324	13.8319	13.6201	13.0499	13.6378	13.7415	13.6027	12.7852	13.2223	13.1091	13.771	sp|P55199|ELL_HUMAN
sp|P55735|SEC13_HUMAN	NA	12.4126	15.1157	13.6792	21.1628	NA	NA	15.3742	14.0537	NA	NA	NA	NA	NA	18.2627	NA	21.0122	NA	NA	12.3288	sp|P55735|SEC13_HUMAN
sp|P55786|PSA_HUMAN	15.1864	13.446	15.4162	16.0963	15.8393	15.6348	15.0587	17.2931	18.3908	17.9874	17.1427	16.7036	17.4165	17.4308	16.331	17.4037	17.031	16.4561	16.561	16.8261	sp|P55786|PSA_HUMAN
sp|P55795|HNRH2_HUMAN	12.3189	10.8462	11.0275	NA	NA	11.003	10.8544	14.2772	12.4814	11.495	10.7961	11.0156	NA	10.9375	NA	NA	NA	11.5769	10.8906	10.5087	sp|P55795|HNRH2_HUMAN
sp|P55808|XG_HUMAN	14.3454	NA	NA	NA	NA	NA	NA	NA	11.9651	NA	12.8368	NA	12.7905	11.7477	NA	NA	NA	NA	11.6567	NA	sp|P55808|XG_HUMAN
sp|P55884|EIF3B_HUMAN	12.8082	NA	11.998	NA	NA	NA	NA	14.0976	NA	NA	NA	NA	NA	NA	NA	NA	NA	12.0587	NA	12.0819	sp|P55884|EIF3B_HUMAN
sp|P56537|IF6_HUMAN	18.2736	17.5807	17.3531	18.3363	17.9583	17.349	17.6531	19.3407	18.7957	19.7471	19.32	17.6775	17.7144	17.928	18.762	18.3092	18.4702	19.1597	18.1672	18.6439	sp|P56537|IF6_HUMAN
sp|P57088|TMM33_HUMAN	11.3105	13.4424	13.5829	13.6707	12.8661	13.8166	13.0415	13.6705	14.0587	10.8179	11.8678	13.3326	13.6443	13.4207	14.7114	13.4365	12.4823	11.5762	13.2512	13.2706	sp|P57088|TMM33_HUMAN
sp|P57735|RAB25_HUMAN	NA	NA	NA	11.8803	NA	NA	NA	13.9281	11.9797	NA	NA	NA	NA	NA	NA	NA	NA	NA	NA	NA	sp|P57735|RAB25_HUMAN
sp|P58107|EPIPL_HUMAN	15.321	13.7998	16.2835	15.8767	15.2287	16.3478	14.7942	19.4318	18.3397	17.9616	15.3319	14.6574	15.5817	15.4164	16.965	16.6263	15.9139	16.9856	15.8	16.2259	sp|P58107|EPIPL_HUMAN
sp|P59665|DEF1_HUMAN	16.4613	13.5038	12.017	13.5803	13.3303	14.8988	14.7134	20.1857	16.8054	13.9253	NA	11.1202	11.8509	NA	15.0413	16.6872	14.0258	16.5525	13.6454	16.2345	sp|P59665|DEF1_HUMAN;sp|P59666|DEF3_HUMAN
sp|P59998|ARPC4_HUMAN	12.5447	NA	12.7508	NA	12.6522	NA	NA	14.6658	NA	12.9886	NA	NA	NA	11.6237	NA	NA	NA	13.4376	NA	12.4304	sp|P59998|ARPC4_HUMAN
sp|P60174|TPIS_HUMAN	15.8661	14.7268	17.9021	16.9294	17.0855	17.8148	16.2308	18.3436	21.5581	19.6344	15.0606	15.8671	16.7643	15.2433	19.5293	18.6757	15.7181	16.926	14.9028	16.5777	sp|P60174|TPIS_HUMAN
sp|P60331|KR101_HUMAN	NA	NA	NA	NA	NA	NA	NA	12.2195	NA	NA	10.4654	NA	13.2339	11.844	NA	13.0009	12.174	13.2886	12.6837	NA	sp|P60331|KR101_HUMAN;sp|P60369|KR103_HUMAN;sp|P60370|KR105_HUMAN;sp|P60409|KR107_HUMAN
sp|P60468|SC61B_HUMAN	12.8108	12.7014	NA	NA	NA	NA	11.7102	11.2608	NA	NA	NA	NA	NA	11.5287	NA	NA	NA	NA	NA	NA	sp|P60468|SC61B_HUMAN
sp|P60660|MYL6_HUMAN	13.3948	12.6802	12.4768	12.7042	12.3591	13.3301	13.346	16.2866	14.3625	13.663	12.6891	10.931	11.6497	12.0494	12.9693	13.6824	13.2329	13.7458	12.755	13.0452	sp|P60660|MYL6_HUMAN
sp|P60709|ACTB_HUMAN	19.4205	18.384	18.5407	18.7356	18.5628	18.9422	18.9638	21.7688	20.3294	19.3351	18.5601	17.8089	18.5178	17.7082	18.7056	19.3429	19.0017	20.1861	18.9457	19.2369	sp|P60709|ACTB_HUMAN;sp|P63261|ACTG_HUMAN
sp|P60842|IF4A1_HUMAN	14.4835	13.2022	13.7383	13.303	13.4567	13.9218	13.7086	16.4334	15.1227	14.0541	13.3947	13.077	13.7094	13.5294	13.4442	14.1117	13.6106	14.5509	13.9666	14.1395	sp|P60842|IF4A1_HUMAN
sp|P60900|PSA6_HUMAN	19.0825	19.4448	20.1081	19.9676	19.5097	20.2055	19.8236	20.288	20.4574	20.0074	19.9731	20.0541	19.7824	20.1165	20.0752	20.0305	20.0579	20.0768	20.0426	20.2796	sp|P60900|PSA6_HUMAN
sp|P60903|S10AA_HUMAN	14.8068	14.4293	14.4834	14.3108	14.0773	15.2209	15.6368	15.4946	14.3674	14.9796	14.5993	14.5802	14.5176	14.5734	14.3445	13.9703	14.4699	13.9908	13.9734	14.6094	sp|P60903|S10AA_HUMAN
sp|P60953|CDC42_HUMAN	NA	NA	NA	NA	NA	NA	13.1903	13.5971	13.8316	NA	NA	12.1523	12.3602	12.974	12.3627	12.9475	11.8844	NA	12.0967	12.8681	sp|P60953|CDC42_HUMAN
sp|P60985|KTDAP_HUMAN	14.4345	14.8858	14.053	14.2084	12.8427	15.2157	13.2687	14.527	15.1154	14.6985	14.8376	14.2052	14.825	15.3961	15.0586	14.7284	14.2142	13.069	15.0281	15.1253	sp|P60985|KTDAP_HUMAN
sp|P61009|SPCS3_HUMAN	11.9623	12.0848	14.9389	15.535	11.7472	12.7147	12.2072	12.2768	13.739	11.4279	15.0308	15.1249	12.5792	12.8259	13.1033	15.2198	15.1861	12.7185	12.408	15.3245	sp|P61009|SPCS3_HUMAN
sp|P61019|RAB2A_HUMAN	12.0455	10.9767	11.159	12.2551	13.0921	12.8924	12.9143	14.2825	13.4332	13.5643	12.7305	11.5843	13.1142	13.2006	12.0578	13.4433	11.755	12.3713	12.9636	13.4101	sp|P61019|RAB2A_HUMAN
sp|P61020|RAB5B_HUMAN	12.3146	12.5474	12.7864	12.6101	11.8865	12.5727	12.9204	13.416	12.5978	12.2609	12.4875	12.0483	12.547	12.522	12.1964	12.7636	12.036	11.4282	11.9532	12.9438	sp|P61020|RAB5B_HUMAN
sp|P61026|RAB10_HUMAN	14.3974	13.8176	14.1904	14.4464	13.5784	14.3495	14.4586	15.1909	15.0167	13.4081	14.4264	13.8433	14.4591	14.8802	14.3868	14.362	13.8432	13.7546	13.6295	14.3661	sp|P61026|RAB10_HUMAN
sp|P61106|RAB14_HUMAN	12.5718	11.9003	12.8823	12.9305	11.8791	11.919	12.3223	13.9341	13.5796	12.9499	12.5585	11.8928	12.1625	12.5028	12.1215	12.894	12.1159	13.4268	12.1485	12.2847	sp|P61106|RAB14_HUMAN
sp|P61158|ARP3_HUMAN	12.6183	11.1736	12.0301	11.8387	11.0259	12.2957	12.0042	15.2044	13.9638	13.1963	12.6152	11.6986	11.6225	11.8983	12.293	12.5211	11.9136	13.0448	11.9907	12.611	sp|P61158|ARP3_HUMAN
sp|P61160|ARP2_HUMAN	NA	11.669	NA	NA	NA	11.2297	11.9952	15.5857	13.3136	11.5045	NA	11.6427	NA	NA	11.9267	11.5105	12.2813	12.2418	NA	NA	sp|P61160|ARP2_HUMAN
sp|P61204|ARF3_HUMAN	13.4562	12.0586	12.3544	13.0142	11.9796	12.2212	13.4094	14.8436	13.6919	13.2016	13.3424	11.5756	13.1881	13.3418	12.4812	13.6159	12.6501	13.2273	12.6039	13.1777	sp|P61204|ARF3_HUMAN;sp|P84077|ARF1_HUMAN;sp|P84085|ARF5_HUMAN
sp|P61221|ABCE1_HUMAN	15.478	14.9474	14.9177	15.3066	14.9949	14.8432	15.5571	16.514	15.4224	15.6126	15.5132	14.947	14.6119	14.4136	14.9257	15.0483	15.0039	15.0727	14.4615	15.0412	sp|P61221|ABCE1_HUMAN
sp|P61224|RAP1B_HUMAN	13.3062	NA	12.7085	12.2684	NA	12.7519	13.8391	14.2237	13.5257	13.0291	13.9219	12.6914	13.7022	14.3444	12.2703	13.5232	12.4508	NA	12.328	13.9583	sp|P61224|RAP1B_HUMAN
sp|P61247|RS3A_HUMAN	NA	NA	NA	NA	NA	NA	NA	10.6422	NA	NA	NA	NA	NA	NA	NA	8.0824	NA	NA	11.5056	NA	sp|P61247|RS3A_HUMAN
sp|P61421|VA0D1_HUMAN	14.0251	13.314	16.227	15.0748	15.0258	15.5465	14.0459	15.1236	16.4332	15.2244	13.3054	14.3553	15.3123	14.6687	16.5534	15.3072	14.8218	13.5021	14.7187	15.6965	sp|P61421|VA0D1_HUMAN
sp|P61457|PHS_HUMAN	14.1917	14.2092	14.7354	14.3218	14.2043	15.0801	14.7408	14.7368	14.5137	15.0549	14.8056	14.5082	14.7592	14.4392	14.0312	15.0157	14.272	14.1019	14.2318	14.8508	sp|P61457|PHS_HUMAN
sp|P61604|CH10_HUMAN	13.7716	13.2344	14.8316	15.3614	14.3425	14.4612	12.7886	16.039	16.3896	15.4635	15.349	14.7169	15.7913	15.9624	15.7475	15.9618	15.9013	15.4561	15.9905	16.2376	sp|P61604|CH10_HUMAN
sp|P61619|S61A1_HUMAN	12.8902	13.3593	12.886	13.169	13.8696	14.0535	13.9155	14.4622	14.6605	10.1849	13.0131	13.4834	12.8858	14.0973	14.6549	13.6073	13.2573	13.3018	14.308	14.0508	sp|P61619|S61A1_HUMAN
sp|P61626|LYSC_HUMAN	14.1889	11.557	9.81315	12.5959	12.1707	10.8691	12.0657	12.2115	11.4213	12.9748	10.0096	11.37	12.0184	11.3944	11.9256	13.9106	11.9997	13.2463	11.4787	13.1204	sp|P61626|LYSC_HUMAN
sp|P61769|B2MG_HUMAN	14.8154	15.634	15.3976	14.7793	12.4743	14.7124	15.3462	13.3419	12.6923	13.8621	12.4892	12.3985	13.1874	11.9814	12.3881	13.7998	11.7921	NA	13.5256	12.8795	sp|P61769|B2MG_HUMAN
sp|P61803|DAD1_HUMAN	15.7566	16.5075	15.8031	16.6464	15.9774	16.1075	16.1346	16.1593	16.3567	14.1585	15.5386	16.6806	16.2409	16.7197	16.4373	16.1874	16.0285	16.1043	16.5188	16.0928	sp|P61803|DAD1_HUMAN
sp|P61916|NPC2_HUMAN	14.5107	14.7313	14.5645	14.6034	14.7703	15.4641	14.5257	16.0599	15.4384	15.4485	15.3143	14.1936	15.7095	14.995	14.2122	15.086	14.5825	13.1658	14.3955	15.1787	sp|P61916|NPC2_HUMAN
sp|P61962|DCAF7_HUMAN	NA	NA	NA	NA	NA	NA	NA	9.72431	15.3775	11.5228	NA	NA	NA	NA	10.9869	NA	NA	NA	NA	NA	sp|P61962|DCAF7_HUMAN
sp|P61964|WDR5_HUMAN	11.4746	NA	13.2087	12.374	10.4334	NA	10.6361	12.6167	13.3792	10.8495	12.2408	11.438	11.9858	12.4205	12.5387	12.1332	12.0779	NA	12.8198	NA	sp|P61964|WDR5_HUMAN
sp|P61970|NTF2_HUMAN	15.8085	13.1895	16.5284	17.4395	15.636	16.9515	13.997	17.7113	18.6608	17.7516	17.4781	16.2792	16.2574	17.4772	18.5216	18.4308	16.3208	17.2715	16.7225	17.9824	sp|P61970|NTF2_HUMAN
sp|P62136|PP1A_HUMAN	13.1356	12.7208	12.6901	11.8116	12.5046	12.4055	12.3528	15.6148	13.3047	13.2003	11.4095	11.2882	12.9624	11.6767	12.0431	13.6891	12.676	12.5429	13.0798	12.5176	sp|P62136|PP1A_HUMAN
sp|P62166|NCS1_HUMAN	NA	NA	11.7945	NA	10.3522	10.8943	9.8637	11.5219	9.9084	10.2028	11.1466	10.392	10.1222	10.4969	10.1208	10.3103	10.3519	NA	NA	10.4382	sp|P62166|NCS1_HUMAN
sp|P62195|PRS8_HUMAN	NA	NA	NA	NA	NA	NA	NA	13.9149	12.1162	NA	NA	NA	NA	NA	NA	NA	NA	11.8885	NA	10.9879	sp|P62195|PRS8_HUMAN
sp|P62258|1433E_HUMAN	13.5023	11.9037	12.805	11.8287	12.092	13.0034	12.9807	15.9491	13.8843	13.5648	13.545	11.5074	12.4663	12.2257	12.6117	13.2533	12.9309	13.5231	12.462	13.3642	sp|P62258|1433E_HUMAN
sp|P62304|RUXE_HUMAN	9.8812	10.0509	13.4098	12.1735	11.5051	11.1352	11.5988	12.0413	11.9565	13.4487	11.0853	10.7211	12.419	11.0477	12.9876	12.6311	12.4319	12.2695	11.7326	10.5469	sp|P62304|RUXE_HUMAN
sp|P62306|RUXF_HUMAN	13.0664	11.8864	14.7614	14.1148	13.7496	14.8604	12.9928	15.2138	16.1228	15.5835	13.6146	13.1874	14.7124	13.874	15.2481	15.4612	14.4188	14.4028	14.2565	14.6363	sp|P62306|RUXF_HUMAN
sp|P62314|SMD1_HUMAN	NA	NA	12.47	10.2403	11.1133	11.7325	9.00126	12.3148	13.1267	11.5924	NA	10.0149	11.3179	10.5145	12.579	12.3864	11.1124	11.7341	11.2851	11.0896	sp|P62314|SMD1_HUMAN
sp|P62316|SMD2_HUMAN	NA	NA	13.378	11.2798	12.0095	11.9501	NA	13.8985	14.9944	14.7597	11.1537	12.091	12.3984	11.9812	13.9221	13.9433	12.9957	13.8086	11.9792	13.4791	sp|P62316|SMD2_HUMAN
sp|P62318|SMD3_HUMAN	14.9206	14.5241	16.8051	16.7816	15.5622	16.8025	15.8872	16.6328	17.5062	17.3437	16.1895	15.4104	16.9897	16.6643	17.169	17.3045	16.4616	16.5591	16.4911	16.4579	sp|P62318|SMD3_HUMAN
sp|P62341|SELT_HUMAN	8.57357	9.71589	9.12165	NA	9.14772	10.4997	9.64144	9.85202	10.9385	NA	9.6077	9.98323	9.75475	10.3507	10.0715	9.67486	9.5792	9.29292	10.0911	9.49056	sp|P62341|SELT_HUMAN
sp|P62491|RB11A_HUMAN	13.7404	13.2312	13.1823	13.8691	12.4487	11.9148	13.3	14.6239	13.3623	12.7121	12.7152	12.0776	13.2763	13.1132	12.4796	13.0107	12.9317	12.9547	12.5897	13.0469	sp|P62491|RB11A_HUMAN;sp|Q15907|RB11B_HUMAN
sp|P62699|YPEL5_HUMAN	12.0642	12.0237	11.8958	11.2863	NA	11.8497	10.6263	12.6657	12.2105	11.4914	12.3565	NA	12.4792	NA	NA	11.836	NA	11.9872	12.0775	11.6979	sp|P62699|YPEL5_HUMAN
sp|P62714|PP2AB_HUMAN	12.1623	12.153	12.4802	11.892	11.4812	11.9364	11.3104	14.5469	12.9311	11.7273	12.0209	11.6146	11.5751	11.9021	12.3006	12.4632	12.409	12.6351	11.9081	11.934	sp|P62714|PP2AB_HUMAN;sp|P67775|PP2AA_HUMAN
sp|P62805|H4_HUMAN	12.8727	13.6559	12.124	12.8465	11.4856	13.8004	12.3255	15.6482	13.4985	11.3975	12.1258	9.93527	13.351	12.2037	12.2787	13.534	13.1732	14.1813	13.9323	12.5158	sp|P62805|H4_HUMAN
sp|P62820|RAB1A_HUMAN	11.6427	10.8095	10.9933	10.4165	11.0008	11.2075	11.2584	13.0969	12.0773	11.2904	11.2123	10.4735	11.1749	12.011	10.9359	11.4598	11.0509	11.1699	11.0096	11.7903	sp|P62820|RAB1A_HUMAN
sp|P62826|RAN_HUMAN	10.446	NA	NA	NA	NA	11.0322	10.3647	10.6526	11.6682	NA	11.3295	NA	NA	NA	NA	NA	NA	11.1397	NA	10.8379	sp|P62826|RAN_HUMAN
sp|P62834|RAP1A_HUMAN	NA	NA	NA	10.0685	NA	NA	10.9424	12.0197	NA	10.9278	12.2757	NA	NA	12.1116	NA	NA	NA	NA	NA	12.3796	sp|P62834|RAP1A_HUMAN
sp|P62873|GBB1_HUMAN	12.1715	11.0794	12.2917	11.6413	11.3926	11.6074	12.2262	10.1429	10.4864	11.5279	9.59012	11.6654	11.565	10.2473	11.203	10.8655	11.6899	11.196	9.78176	8.89813	sp|P62873|GBB1_HUMAN
sp|P62879|GBB2_HUMAN	12.1208	9.08091	10.9628	11.4948	9.89626	11.4608	10.6713	10.9335	13.2936	9.37814	9.67118	9.6232	11.6042	9.62969	10.8922	10.9629	10.5775	9.48145	10.0112	9.83221	sp|P62879|GBB2_HUMAN
sp|P62937|PPIA_HUMAN	14.4006	13.3481	13.3363	13.3839	11.8237	13.6184	14.4034	16.4307	14.8092	14.3363	13.2984	13.2159	14.0424	13.2509	13.5385	14.3078	13.4947	13.0475	12.1376	13.0449	sp|P62937|PPIA_HUMAN
sp|P62942|FKB1A_HUMAN	11.8287	NA	11.5744	NA	NA	NA	NA	13.9517	12.0757	NA	NA	NA	11.9027	10.7544	NA	12.6532	11.9008	11.8546	12.1524	NA	sp|P62942|FKB1A_HUMAN
sp|P63010|AP2B1_HUMAN	12.7865	12.5387	NA	12.9772	12.3896	12.0449	12.4372	13.8915	12.9921	14.0384	14.2482	12.0554	13.502	13.3129	13.2301	13.039	12.7969	13.93	13.7362	13.2922	sp|P63010|AP2B1_HUMAN
sp|P63027|VAMP2_HUMAN	14.3511	13.8886	13.2389	13.7999	13.2962	13.6315	13.7341	13.7764	13.5733	NA	14.3312	14.3321	14.1287	13.5092	14.1651	14.1484	13.7611	14.0539	14.576	14.171	sp|P63027|VAMP2_HUMAN
sp|P63098|CANB1_HUMAN	12.3523	12.3913	13.3777	12.0838	13.412	12.8493	13.2627	13.4748	11.6477	12.9896	12.6969	13.1511	13.4875	13.2429	13.3482	13.1249	13.2768	12.2134	13.2077	12.4164	sp|P63098|CANB1_HUMAN
sp|P63104|1433Z_HUMAN	14.4519	13.5877	13.5499	13.8182	13.6121	13.8494	14.2891	17.0833	14.8965	14.5297	14.0378	13.1873	14.0143	13.8644	13.6278	14.242	14.2534	14.7275	14.1012	14.2476	sp|P63104|1433Z_HUMAN
sp|P63151|2ABA_HUMAN	10.4647	9.35346	10.4459	9.8193	9.43231	10.367	10.256	12.689	11.7388	NA	9.81096	7.98797	NA	9.94048	11.6989	10.7045	8.71386	10.053	NA	9.91226	sp|P63151|2ABA_HUMAN
sp|P63167|DYL1_HUMAN	NA	NA	12.4808	11.3451	NA	12.2426	NA	13.7801	12.3485	NA	11.6006	NA	NA	NA	12.3025	11.4468	NA	NA	NA	10.9179	sp|P63167|DYL1_HUMAN;sp|Q96FJ2|DYL2_HUMAN
sp|P63220|RS21_HUMAN	NA	NA	NA	NA	NA	NA	NA	13.5807	11.7926	NA	NA	NA	NA	NA	NA	NA	NA	NA	13.7748	NA	sp|P63220|RS21_HUMAN
sp|P63241|IF5A1_HUMAN	12.6936	11.6289	11.2019	11.4395	10.6191	12.447	12.2804	15.0652	13.3517	11.852	11.6401	10.6612	11.5128	11.3821	11.495	12.1716	11.8499	12.7095	11.9139	11.2918	sp|P63241|IF5A1_HUMAN
sp|P63244|RACK1_HUMAN	14.1537	12.7357	13.0654	12.8119	13.1775	13.3725	12.5597	15.2966	13.9598	13.0975	12.5422	12.2363	12.7337	13.0455	13.4801	13.2403	13.013	13.709	13.3556	13.4733	sp|P63244|RACK1_HUMAN
sp|P67812|SC11A_HUMAN	14.2183	14.0402	14.0716	14.7361	14.0287	14.3233	14.4017	13.9323	14.7154	13.4522	14.6931	14.4487	14.1868	14.5381	14.8391	14.4798	14.2465	14.4798	14.3678	14.1322	sp|P67812|SC11A_HUMAN
sp|P67936|TPM4_HUMAN	14.0876	12.0185	12.741	12.5825	11.8522	14.7366	13.9717	13.4043	12.2607	11.6889	11.8693	10.9238	12.033	12.2686	14.1429	12.8243	11.8018	13.1235	12.2692	13.3412	sp|P67936|TPM4_HUMAN
sp|P68032|ACTC_HUMAN	15.2425	14.4331	14.6461	14.1513	14.2533	15.202	14.8868	18.3777	16.5726	15.2979	15.2919	13.8618	14.8427	13.9969	15.0911	15.703	15.3163	16.1021	15.2424	15.555	sp|P68032|ACTC_HUMAN
sp|P68104|EF1A1_HUMAN	17.8874	16.4273	17.6697	16.6521	17.0809	17.0581	16.9477	18.9091	18.1091	16.951	17.0829	16.4075	16.8442	17.0265	17.0111	17.3486	16.991	17.5761	17.0588	17.8596	sp|P68104|EF1A1_HUMAN;sp|Q5VTE0|EF1A3_HUMAN
sp|P68366|TBA4A_HUMAN	14.0366	12.8952	12.6206	10.7306	12.4758	12.9263	13.1806	16.6395	14.0885	12.9317	12.5866	10.2546	12.5783	12.1361	12.3299	13.4446	12.9137	14.37	13.0776	13.4495	sp|P68366|TBA4A_HUMAN
sp|P68371|TBB4B_HUMAN	14.1885	13.6167	11.921	13.3127	12.5895	13.9569	12.9955	17.8223	15.8137	14.27	13.5522	11.6795	12.4071	12.8667	13.2377	14.2	14.0903	14.9512	14.1248	14.4231	sp|P68371|TBB4B_HUMAN
sp|P68431|H31_HUMAN	13.7538	14.0474	14.2648	13.9157	12.4539	15.4801	12.8177	16.0321	14.4984	11.7167	13.8185	14.3222	14.7146	13.4492	12.6235	14.7149	14.2634	15.4835	14.9939	NA	sp|P68431|H31_HUMAN;sp|P84243|H33_HUMAN;sp|Q16695|H31T_HUMAN;sp|Q6NXT2|H3C_HUMAN;sp|Q71DI3|H32_HUMAN
sp|P68871|HBB_HUMAN	17.5248	16.2648	16.4238	17.4865	16.3471	24.7991	22.0644	20.4375	22.2089	20.4292	16.5815	16.9624	16.3676	15.7485	14.907	15.6072	15.533	16.2743	14.4412	16.944	sp|P68871|HBB_HUMAN
sp|P69849|NOMO3_HUMAN	12.0073	11.3726	12.2547	12.6089	12.1386	12.436	12.9592	13.2149	13.2187	12.4788	12.542	11.485	12.4494	12.6916	11.9311	13.4952	12.0556	12.228	12.1372	12.7816	sp|P69849|NOMO3_HUMAN;sp|Q15155|NOMO1_HUMAN;sp|Q5JPE7|NOMO2_HUMAN
sp|P69891|HBG1_HUMAN	9.65047	7.28369	8.45655	9.51013	7.88764	16.1048	15.1334	12.0078	13.6057	12.7181	6.98915	9.07567	NA	NA	NA	7.71385	NA	NA	NA	8.82229	sp|P69891|HBG1_HUMAN;sp|P69892|HBG2_HUMAN
sp|P69905|HBA_HUMAN	17.5547	15.839	15.7677	16.1945	16.1355	23.5516	21.5002	19.7944	20.5084	19.3607	15.5256	16.0753	16.2587	15.4259	14.1774	13.9151	14.6806	15.6398	13.3677	15.0795	sp|P69905|HBA_HUMAN
sp|P78330|SERB_HUMAN	14.0172	14.2829	16.5588	15.595	15.709	16.1622	14.8672	14.6723	16.5669	16.0088	15.5282	15.6303	15.6648	16.2484	16.5319	15.759	15.2779	15.4569	15.609	15.7073	sp|P78330|SERB_HUMAN
sp|P78371|TCPB_HUMAN	NA	NA	NA	NA	NA	NA	NA	14.1227	12.7414	NA	NA	NA	NA	NA	NA	NA	NA	NA	NA	11.8464	sp|P78371|TCPB_HUMAN
sp|P78385|KRT83_HUMAN	11.3845	15.7703	15.5785	15.0992	15.3624	15.7023	12.8507	17.2252	13.966	12.8493	17.0599	13.1817	16.544	16.9595	12.7382	16.6407	15.9274	18.3543	17.1444	13.0287	sp|P78385|KRT83_HUMAN
sp|P78386|KRT85_HUMAN	13.9159	17.9267	17.9752	16.6357	17.1333	16.9402	14.1831	18.4476	15.6139	14.5498	18.7031	15.5692	19.0106	18.6713	14.6457	18.0242	18.1806	19.6794	19.1637	14.219	sp|P78386|KRT85_HUMAN
sp|P78417|GSTO1_HUMAN	10.7843	NA	NA	12.9469	NA	9.33917	NA	12.7936	13.1585	10.4402	NA	NA	NA	NA	NA	13.2698	NA	12.8511	NA	NA	sp|P78417|GSTO1_HUMAN
sp|P78527|PRKDC_HUMAN	13.4486	13.1748	10.4819	10.3449	13.3052	10.5398	13.4203	13.1558	10.57	13.2631	12.3367	12.5918	12.6747	13.4829	10.9414	13.5602	13.9552	13.877	13.8619	10.8927	sp|P78527|PRKDC_HUMAN
sp|P80108|PHLD_HUMAN	15.3167	15.5415	15.6106	16.3788	16.3568	15.6994	14.7077	16.1069	16.9068	17.1893	16.9608	15.9508	16.7241	16.8317	17.1871	16.7107	16.4882	15.9124	16.2769	16.935	sp|P80108|PHLD_HUMAN
sp|P80188|NGAL_HUMAN	8.82638	8.86665	NA	8.28433	NA	9.18578	8.50706	11.5227	9.27755	NA	9.7004	NA	8.77156	NA	NA	9.86124	NA	10.9817	9.68459	NA	sp|P80188|NGAL_HUMAN
sp|P80303|NUCB2_HUMAN	11.0483	9.65506	NA	NA	NA	8.00821	10.9207	NA	8.87695	NA	NA	NA	NA	NA	NA	8.62613	NA	NA	NA	NA	sp|P80303|NUCB2_HUMAN
sp|P81605|DCD_HUMAN	22.4508	23.1719	22.5027	24.3991	19.3693	22.0796	23.7037	19.0323	20.1461	20.6197	21.2631	19.5768	20.213	19.304	19.982	20.1101	18.163	20.2446	20.8814	19.7489	sp|P81605|DCD_HUMAN
sp|P83876|TXN4A_HUMAN	13.8614	13.2962	14.4642	13.8927	13.2308	14.491	14.3152	13.346	13.9363	12.9946	13.7626	13.9236	13.216	13.4258	14.2025	14.2324	13.0683	12.7614	13.2583	15.1702	sp|P83876|TXN4A_HUMAN
sp|P84095|RHOG_HUMAN	NA	NA	NA	9.10178	NA	NA	NA	10.7449	9.33218	11.0072	NA	NA	NA	10.1645	NA	NA	NA	8.66719	NA	10.1419	sp|P84095|RHOG_HUMAN
sp|P99999|CYC_HUMAN	14.7226	13.8449	15.3451	14.689	14.8552	14.6338	14.2463	13.1239	14.1542	13.625	14.235	13.7853	14.6167	15.6966	14.273	14.6071	15.077	13.4506	14.2161	14.4345	sp|P99999|CYC_HUMAN
sp|Q00169|PIPNA_HUMAN	NA	NA	12.276	12.5036	NA	12.6942	NA	12.1072	13.2518	NA	NA	NA	NA	12.3463	13.0935	12.4205	NA	NA	NA	12.6557	sp|Q00169|PIPNA_HUMAN
sp|Q00325|MPCP_HUMAN	12.3624	11.2148	12.1648	12.2465	NA	12.8865	11.0636	13.4874	13.2812	NA	11.9209	11.7282	11.7496	12.3728	12.4166	12.0979	12.3051	12.6119	12.707	12.8504	sp|Q00325|MPCP_HUMAN
sp|Q00577|PURA_HUMAN	15.8423	14.6334	15.7	15.2006	14.8326	15.567	14.1903	15.9937	15.3278	13.5842	16.0906	14.4414	15.5994	15.9843	15.1052	15.6807	14.848	15.2023	15.8272	15.9987	sp|Q00577|PURA_HUMAN
sp|Q00610|CLH1_HUMAN	12.5357	12.0418	12.392	12.1823	11.9635	12.5509	12.5874	15.8371	14.1883	12.494	12.6058	11.8182	12.446	12.4258	12.5193	12.3854	12.7327	13.0111	12.5158	12.5575	sp|Q00610|CLH1_HUMAN
sp|Q00796|DHSO_HUMAN	10.7696	NA	11.1141	NA	NA	8.96526	NA	12.5245	11.3764	NA	10.9076	NA	NA	NA	9.67796	10.153	9.33812	9.89402	9.44257	11.5204	sp|Q00796|DHSO_HUMAN
sp|Q01459|DIAC_HUMAN	17.7154	18.0072	17.7445	17.6762	17.3627	17.7994	17.7545	17.9371	17.1186	18.2891	17.3624	17.3946	17.3416	17.4565	17.3095	17.486	17.2997	16.7007	17.0521	17.7034	sp|Q01459|DIAC_HUMAN
sp|Q01469|FABP5_HUMAN	18.4847	17.0963	16.9641	17.2334	17.9375	16.8782	18.4069	19.3209	17.8773	18.2076	18.9716	16.4789	17.0503	16.7034	17.9242	18.499	16.6153	20.6687	18.2504	18.8096	sp|Q01469|FABP5_HUMAN
sp|Q01518|CAP1_HUMAN	12.4883	11.6754	11.4888	11.6114	10.6548	11.3335	12.2264	14.5897	12.7211	11.9745	11.7223	NA	11.1842	10.2265	NA	12.2766	11.9428	12.494	11.1238	11.8381	sp|Q01518|CAP1_HUMAN
sp|Q01546|K22O_HUMAN	NA	NA	NA	NA	NA	NA	NA	11.0715	NA	13.7305	NA	NA	NA	NA	NA	NA	NA	11.0396	NA	12.9666	sp|Q01546|K22O_HUMAN
sp|Q01581|HMCS1_HUMAN	NA	NA	NA	NA	NA	NA	NA	13.2637	12.0082	NA	NA	NA	NA	NA	NA	NA	NA	11.0596	NA	NA	sp|Q01581|HMCS1_HUMAN
sp|Q01970|PLCB3_HUMAN	14.0313	11.1331	15.44	13.7828	14.5265	15.1377	11.4329	14.1097	15.1847	13.9902	14.794	12.1621	13.5633	15.589	14.7283	15.2116	13.4869	13.8689	10.7184	13.2147	sp|Q01970|PLCB3_HUMAN
sp|Q02083|NAAA_HUMAN	11.4573	11.0212	13.1084	11.3199	11.234	11.5785	11.3664	12.4462	12.9498	12.8687	12.1863	11.8201	12.9511	12.6769	11.6664	12.2999	12.5263	11.7027	11.095	11.8403	sp|Q02083|NAAA_HUMAN
sp|Q02388|CO7A1_HUMAN	15.8897	16.249	16.0208	15.9896	16.2805	16.3961	15.5645	16.3176	16.8526	16.3559	16.4521	16.2406	16.8123	15.9709	16.1396	16.2233	16.4589	15.6376	15.8212	16.0814	sp|Q02388|CO7A1_HUMAN
sp|Q02413|DSG1_HUMAN	23.6048	23.5468	21.9089	23.4385	23.1324	23.2197	23.8932	23.8166	23.1752	24.7084	23.8206	22.6969	23.6231	23.0962	23.6302	24.283	23.7258	23.1533	23.4174	24.1595	sp|Q02413|DSG1_HUMAN
sp|Q02487|DSC2_HUMAN	12.2748	10.6429	10.6947	12.0117	10.5823	10.889	12.7067	10.5337	9.56284	10.9378	10.2977	9.90813	10.6724	9.95191	10.047	10.7716	10.3959	11.1209	10.8287	10.6693	sp|Q02487|DSC2_HUMAN
sp|Q02818|NUCB1_HUMAN	13.9842	13.9124	12.9112	14.2582	12.7318	12.729	14.3333	13.2984	13.5202	13.0395	14.1706	12.6256	13.2553	13.7815	13.0359	13.2729	12.6039	12.6181	13.0595	13.5454	sp|Q02818|NUCB1_HUMAN
sp|Q03252|LMNB2_HUMAN	NA	10.2283	12.1985	11.7575	11.775	11.8461	10.0873	NA	10.9913	NA	11.6051	NA	11.448	11.4841	11.4146	11.7446	10.513	11.797	11.3293	12.2367	sp|Q03252|LMNB2_HUMAN
sp|Q03518|TAP1_HUMAN	13.0386	13.8343	13.8633	13.3744	13.298	13.6685	13.0625	14.3301	14.509	NA	NA	13.7123	13.3661	13.777	13.5006	12.9573	13.7677	13.3881	13.5873	13.2798	sp|Q03518|TAP1_HUMAN
sp|Q03519|TAP2_HUMAN	11.0859	8.3546	12.1886	11.2914	12.1187	11.5056	12.4876	9.95119	NA	11.3095	11.0875	11.3805	11.8142	12.2765	10.3109	11.4655	9.60027	11.8711	10.7222	11.6959	sp|Q03519|TAP2_HUMAN
sp|Q04637|IF4G1_HUMAN	NA	NA	NA	NA	NA	NA	NA	13.3476	11.1588	NA	NA	NA	NA	NA	NA	NA	NA	NA	NA	NA	sp|Q04637|IF4G1_HUMAN
sp|Q04695|K1C17_HUMAN	20.724	20.2789	20.8166	20.0718	20.5173	20.8924	20.1472	22.1145	20.0313	21.122	20.249	20.4138	19.9259	20.878	20.5948	20.2749	20.8982	21.5571	20.1048	21.1337	sp|Q04695|K1C17_HUMAN
sp|Q04726|TLE3_HUMAN	9.26202	9.7177	11.36	11.2308	11.4457	11.6017	NA	11.0591	10.839	10.1262	10.8993	9.18425	11.4539	10.6766	11.9798	11.6462	8.93523	11.738	11.418	11.4188	sp|Q04726|TLE3_HUMAN
sp|Q04760|LGUL_HUMAN	11.3491	9.78074	11.2726	9.95914	10.5724	10.296	11.7822	13.8654	12.4657	12.1892	11.9024	9.65675	10.907	11.7178	11.1936	11.8891	NA	12.1575	10.7188	11.6526	sp|Q04760|LGUL_HUMAN
sp|Q04837|SSBP_HUMAN	NA	11.2652	NA	NA	10.6267	NA	NA	14.4704	12.6192	NA	NA	10.6707	11.3262	NA	NA	13.4432	9.23376	10.6858	13.7378	13.1319	sp|Q04837|SSBP_HUMAN
sp|Q05655|KPCD_HUMAN	NA	NA	11.4711	NA	10.0554	10.2936	10.2206	11.0616	11.1109	10.2778	10.7881	9.48875	10.5382	11.2684	NA	11.114	10.4406	NA	9.66178	10.6576	sp|Q05655|KPCD_HUMAN
sp|Q06136|KDSR_HUMAN	11.3178	11.8129	12.9989	12.9888	12.462	12.4969	12.2749	12.3437	12.7707	NA	10.6325	12.2909	12.1015	13.2639	10.9807	13.0095	12.7045	12.1838	11.5612	12.7031	sp|Q06136|KDSR_HUMAN
sp|Q06323|PSME1_HUMAN	NA	NA	NA	NA	NA	14.2956	NA	14.9394	13.8427	13.8239	NA	NA	NA	NA	NA	NA	13.8094	12.9504	13.2463	NA	sp|Q06323|PSME1_HUMAN
sp|Q06828|FMOD_HUMAN	NA	11.0869	NA	12.9078	NA	NA	11.2426	NA	NA	NA	NA	NA	NA	NA	NA	NA	NA	NA	NA	NA	sp|Q06828|FMOD_HUMAN
sp|Q06830|PRDX1_HUMAN	18.203	17.3594	17.9325	17.7587	18.1313	17.9887	17.9114	19.4876	18.8532	20.066	18.9293	17.8899	18.5132	17.7713	18.4672	18.9387	18.2198	20.0164	18.3765	18.9857	sp|Q06830|PRDX1_HUMAN
sp|Q07020|RL18_HUMAN	NA	15.4414	NA	NA	NA	NA	NA	12.4424	12.6489	NA	15.409	NA	14.8973	NA	NA	15.3705	NA	NA	NA	NA	sp|Q07020|RL18_HUMAN
sp|Q07021|C1QBP_HUMAN	13.6745	13.7197	13.2573	13.5938	13.4559	13.5084	NA	13.1186	14.0083	NA	14.1541	13.3536	13.8507	14.9389	13.8461	13.9482	12.9702	13.4681	13.8392	13.71	sp|Q07021|C1QBP_HUMAN
sp|Q07065|CKAP4_HUMAN	14.5337	14.5015	14.5471	14.4074	14.9025	14.7394	15.3091	14.8101	14.7252	14.7246	15.221	14.6034	15.1435	15.4374	14.7151	15.3468	14.2489	13.8191	14.4279	15.3864	sp|Q07065|CKAP4_HUMAN
sp|Q07960|RHG01_HUMAN	NA	10.6781	NA	NA	NA	NA	11.5235	13.8064	12.5701	11.1111	NA	NA	11.3781	11.4457	NA	11.1368	NA	10.6971	NA	11.0439	sp|Q07960|RHG01_HUMAN
sp|Q08188|TGM3_HUMAN	22.039	22.189	22.2535	21.8799	22.1716	22.3175	22.3179	22.4225	22.3501	22.3175	22.6647	22.0797	22.4521	22.2641	21.7078	22.1587	22.2475	21.7791	22.1022	22.0527	sp|Q08188|TGM3_HUMAN
sp|Q08380|LG3BP_HUMAN	14.685	15.5406	15.1617	14.4882	15.017	15.1884	14.9717	15.5243	15.5146	15.3792	14.3068	14.5819	14.5171	13.595	15.1723	14.7938	14.2754	14.1572	14.5259	14.5494	sp|Q08380|LG3BP_HUMAN
sp|Q08554|DSC1_HUMAN	22.4122	22.0256	20.0317	22.2013	22.6286	21.44	22.9399	23	22.4524	23.7009	22.4068	21.9372	22.4414	22.1032	22.4669	23.2225	22.7339	22.2286	22.1436	22.876	sp|Q08554|DSC1_HUMAN
sp|Q08945|SSRP1_HUMAN	NA	NA	11.5207	12.1371	NA	10.7506	10.3374	10.9411	12.9181	NA	12.0041	10.3934	NA	11.7627	12.9297	12.6474	NA	11.5957	NA	10.8239	sp|Q08945|SSRP1_HUMAN
sp|Q09666|AHNK_HUMAN	10.407	12.4053	9.47632	NA	9.19211	13.5491	12.0068	13.3027	NA	NA	10.1244	NA	11.3072	11.1973	9.82217	NA	NA	NA	NA	NA	sp|Q09666|AHNK_HUMAN
sp|Q0PNE2|ELP6_HUMAN	11.1429	10.8467	11.1647	11.1967	10.9906	11.8706	11.5622	10.9461	11.4418	11.6991	11.2968	11.3859	11.5842	11.0882	12.5952	10.7106	10.9576	10.9591	11.2614	10.8364	sp|Q0PNE2|ELP6_HUMAN
sp|Q10472|GALT1_HUMAN	NA	NA	NA	NA	NA	NA	12.9538	NA	NA	NA	NA	NA	NA	11.5504	11.9011	NA	NA	NA	NA	NA	sp|Q10472|GALT1_HUMAN
sp|Q10567|AP1B1_HUMAN	11.5244	11.052	10.8023	11.8002	11.4682	11.9935	11.6087	14.3164	15.0852	14.131	12.6702	NA	12.1893	11.1318	13.7604	13.5042	12.0588	13.3903	12.543	13.1715	sp|Q10567|AP1B1_HUMAN
sp|Q12792|TWF1_HUMAN	NA	NA	NA	NA	NA	NA	NA	12.2752	11.872	10.7149	NA	NA	NA	NA	10.9538	NA	NA	10.7897	NA	10.1669	sp|Q12792|TWF1_HUMAN
sp|Q12860|CNTN1_HUMAN	NA	10.173	NA	10.905	NA	NA	NA	12.5537	12.1211	10.8561	10.4131	NA	NA	NA	NA	12.3546	11.0712	11.205	NA	10.4343	sp|Q12860|CNTN1_HUMAN
sp|Q12907|LMAN2_HUMAN	13.6447	12.8301	13.5676	13.3708	13.8121	11.2053	14.6178	14.1033	15.2546	13.4107	14.4042	13.6715	13.4853	14.6152	14.0332	14.3953	13.4538	12.3572	12.9773	13.9949	sp|Q12907|LMAN2_HUMAN
sp|Q12923|PTN13_HUMAN	NA	NA	9.698	NA	NA	10.0682	NA	10.3869	11.1264	10.3648	9.96531	NA	9.77067	9.48187	9.57566	10.2225	NA	NA	NA	11.7835	sp|Q12923|PTN13_HUMAN
sp|Q12955|ANK3_HUMAN	12.1587	12.6604	13.278	13.3643	12.9924	13.4944	13.0259	13.5962	13.616	13.1545	13.4539	13.5592	13.7711	13.2144	13.8641	13.7467	13.8445	13.3286	13.6741	14.1482	sp|Q12955|ANK3_HUMAN
sp|Q12965|MYO1E_HUMAN	NA	NA	11.0836	10.9151	11.8285	12.3177	NA	14.1113	12.399	NA	NA	NA	NA	NA	NA	NA	NA	12.5847	NA	NA	sp|Q12965|MYO1E_HUMAN
sp|Q12981|SEC20_HUMAN	12.9147	13.575	12.4842	12.2906	11.7348	11.739	12.6638	13.2384	13.0476	NA	12.6466	12.5304	12.3729	12.6589	13.2612	12.673	12.7426	12.3487	13.1816	11.8341	sp|Q12981|SEC20_HUMAN
sp|Q13011|ECH1_HUMAN	NA	NA	NA	NA	NA	NA	NA	13.1817	NA	NA	NA	NA	NA	NA	NA	NA	NA	11.3766	NA	NA	sp|Q13011|ECH1_HUMAN
sp|Q13126|MTAP_HUMAN	14.1056	13.7419	15.9791	16.1196	15.2569	15.6243	14.2768	16.6574	17.2412	16.8125	16.3745	15.1834	15.9539	15.857	16.1892	16.0352	15.9995	15.8096	15.7953	16.4322	sp|Q13126|MTAP_HUMAN
sp|Q13162|PRDX4_HUMAN	16.5383	15.7841	16.6413	16.0464	15.7601	16.0504	16.9865	16.5287	16.2403	16.7452	16.0567	16.4662	16.2875	16.3287	16.2387	16.1874	16.7555	16.5564	16.3147	16.55	sp|Q13162|PRDX4_HUMAN
sp|Q13200|PSMD2_HUMAN	NA	NA	NA	NA	NA	NA	NA	13.5356	10.9604	NA	NA	NA	NA	NA	NA	NA	NA	9.77809	NA	NA	sp|Q13200|PSMD2_HUMAN
sp|Q13228|SBP1_HUMAN	16.5137	16.5069	17.062	17.0865	16.4284	17.4203	16.6141	17.0718	17.7463	17.3851	17.3162	17.2439	17.862	17.6734	17.757	17.6168	17.3427	17.2167	17.7794	17.7806	sp|Q13228|SBP1_HUMAN
sp|Q13347|EIF3I_HUMAN	NA	NA	NA	10.6679	NA	NA	NA	12.5706	9.33648	NA	NA	NA	NA	NA	NA	8.61483	NA	9.03736	NA	NA	sp|Q13347|EIF3I_HUMAN
sp|Q13421|MSLN_HUMAN	12.6921	NA	12.9059	12.6387	NA	12.0959	14.4515	NA	12.4806	NA	NA	NA	NA	NA	NA	11.6706	NA	NA	NA	NA	sp|Q13421|MSLN_HUMAN
sp|Q13510|ASAH1_HUMAN	20.5314	20.6576	20.8026	19.9987	20.0552	20.6118	21.05	20.8089	19.8838	20.3946	20.8652	20.6459	20.7916	20.4009	20.8026	20.5108	20.7267	20.1111	20.4867	20.6901	sp|Q13510|ASAH1_HUMAN
sp|Q13555|KCC2G_HUMAN	15.3123	15.7443	15.5013	15.5547	15.268	15.7248	15.5381	15.596	15.083	15.4613	15.3524	14.8343	15.2257	14.8377	15.4056	15.3142	15.2583	15.4655	15.3757	15.4531	sp|Q13555|KCC2G_HUMAN
sp|Q13557|KCC2D_HUMAN	18.7411	18.778	18.594	18.2782	18.1363	18.5346	18.7521	18.4644	18.2221	18.7197	18.4891	18.5704	18.2281	18.1624	18.514	18.7261	18.6566	17.8882	18.7214	18.6272	sp|Q13557|KCC2D_HUMAN
sp|Q13586|STIM1_HUMAN	12.3403	12.0001	12.3062	12.6196	12.6384	12.3857	12.3907	12.8818	13.4601	12.2888	11.7973	12.5205	12.6279	14.3239	12.2695	13.4626	11.4905	11.0543	12.1668	12.4427	sp|Q13586|STIM1_HUMAN
sp|Q13596|SNX1_HUMAN	13.604	12.8289	14.2627	13.3748	13.7871	14.2601	13.7254	13.233	12.7816	12.6291	13.5944	13.632	13.0062	14.1883	14.2682	13.8058	13.0905	13.4677	13.4564	14.0461	sp|Q13596|SNX1_HUMAN
sp|Q13724|MOGS_HUMAN	13.131	12.7983	12.8807	13.1171	12.5374	12.8565	12.8731	12.7507	12.6679	11.9732	13.2099	11.9579	13.2193	13.5843	12.4128	13.2375	11.6956	12.1791	12.0041	12.6594	sp|Q13724|MOGS_HUMAN
sp|Q13813|SPTN1_HUMAN	NA	NA	11.1424	NA	NA	NA	NA	13.9209	11.8403	11.8428	NA	NA	NA	NA	NA	NA	NA	NA	NA	NA	sp|Q13813|SPTN1_HUMAN
sp|Q13835|PKP1_HUMAN	11.2097	7.87765	7.8168	7.92124	7.21803	11.8525	12.2477	13.3804	8.89141	13.4068	8.32466	7.82379	8.35781	7.95905	8.60131	9.85067	8.3248	9.02357	13.5188	8.76549	sp|Q13835|PKP1_HUMAN
sp|Q13838|DX39B_HUMAN	NA	NA	NA	NA	NA	NA	NA	13.3906	11.3437	NA	NA	NA	NA	NA	NA	NA	NA	NA	NA	NA	sp|Q13838|DX39B_HUMAN
sp|Q13867|BLMH_HUMAN	21.1422	21.0017	22.0793	21.9816	21.6623	22.2994	21.1461	21.6032	23.1487	22.6876	21.6244	22.3995	22.3705	22.972	22.7422	22.5192	22.1937	20.5701	22.3932	22.2559	sp|Q13867|BLMH_HUMAN
sp|Q13882|PTK6_HUMAN	12.8384	12.0222	12.7081	12.252	12.1415	11.8091	12.4401	14.2097	12.7806	12.3413	12.1309	11.8794	11.9441	12.8263	12.3341	11.9091	11.7965	12.7318	11.9751	11.9184	sp|Q13882|PTK6_HUMAN
sp|Q13885|TBB2A_HUMAN	15.7313	15.2046	15.124	14.7425	14.5597	15.3882	15.1626	18.4467	16.5443	15.2871	14.9934	13.7292	15.1324	14.9272	14.8032	15.6178	15.5116	16.3835	15.3175	15.4212	sp|Q13885|TBB2A_HUMAN
sp|Q14108|SCRB2_HUMAN	15.8582	15.8746	15.1842	15.5239	15.5779	15.344	15.486	16.1095	15.8311	13.83	16.1945	15.625	15.6816	16.1369	16.5417	16.0992	15.2634	16.3435	15.8889	15.8388	sp|Q14108|SCRB2_HUMAN
sp|Q14116|IL18_HUMAN	13.6555	13.2125	14.1182	13.5115	13.1638	13.7771	13.8837	15.5242	14.3673	14.4089	13.6152	13.4831	13.5902	13.6368	13.651	14.0282	13.5965	13.0395	12.7149	14.0843	sp|Q14116|IL18_HUMAN
sp|Q14118|DAG1_HUMAN	12.5851	11.8131	11.2729	13.0268	10.0718	11.0595	13.23	10.7551	11.119	11.177	11.0548	NA	10.9783	10.6043	10.1971	11.1249	9.59745	10.3808	10.6179	10.7435	sp|Q14118|DAG1_HUMAN
sp|Q14134|TRI29_HUMAN	11.7733	NA	12.2288	11.9324	11.1894	11.5394	11.4486	15.6335	14.0545	12.9252	NA	11.4529	12.8245	10.9151	11.7089	13.1118	11.8537	12.8675	11.8183	NA	sp|Q14134|TRI29_HUMAN
sp|Q14152|EIF3A_HUMAN	NA	NA	12.3233	NA	NA	NA	NA	14.7389	NA	NA	NA	NA	NA	15.0716	NA	NA	NA	14.2988	NA	NA	sp|Q14152|EIF3A_HUMAN
sp|Q14165|MLEC_HUMAN	12.2947	11.8501	12.3444	12.0025	11.5221	12.2164	12.8137	12.0424	12.841	12.4481	12.5756	11.9996	12.3284	12.8301	11.538	12.3287	11.9813	10.6155	11.6623	12.4561	sp|Q14165|MLEC_HUMAN
sp|Q14204|DYHC1_HUMAN	NA	NA	NA	13.9727	NA	NA	14.0365	14.0621	12.7518	NA	NA	13.6205	NA	NA	NA	14.2046	NA	NA	13.8793	13.0213	sp|Q14204|DYHC1_HUMAN
sp|Q14210|LY6D_HUMAN	13.0089	11.1734	11.6814	12.3321	12.058	12.4512	12.3106	13.6353	12.2077	13.1031	11.7924	10.7585	13.0876	12.4165	NA	11.911	10.4145	NA	11.583	12.0674	sp|Q14210|LY6D_HUMAN
sp|Q14247|SRC8_HUMAN	10.2568	NA	NA	12.474	10.2907	13.658	NA	14.5101	12.0912	12.1034	12.0754	NA	11.5966	11.8819	11.3244	10.5974	11.8658	12.6771	10.4463	NA	sp|Q14247|SRC8_HUMAN
sp|Q14525|KT33B_HUMAN	17.8562	21.1173	20.9733	20.1952	20.9972	20.7952	18.6161	21.8246	19.5522	18.9439	22.5294	19.107	23.0694	21.9041	18.6696	21.7292	21.8322	23.4062	22.6758	18.7185	sp|Q14525|KT33B_HUMAN
sp|Q14532|K1H2_HUMAN	NA	9.57823	8.76339	9.04741	NA	NA	NA	12.2684	NA	NA	11.4362	NA	10.7941	9.99471	NA	11.7557	11.7126	14.1926	13.1719	NA	sp|Q14532|K1H2_HUMAN
sp|Q14533|KRT81_HUMAN	NA	13.9403	14.4182	12.9554	13.8014	13.4196	12.4108	15.6551	12.4457	11.0184	14.679	11.7257	15.5539	14.2672	11.312	14.8611	14.3983	15.6822	14.7283	11.5893	sp|Q14533|KRT81_HUMAN
sp|Q14573|ITPR3_HUMAN	15.9217	16.1027	15.2012	15.3618	14.5626	15.2398	15.6229	NA	16.1867	12.6357	15.4795	15.8914	15.6404	16.0771	15.4811	NA	14.9798	14.8554	NA	15.4306	sp|Q14573|ITPR3_HUMAN
sp|Q14574|DSC3_HUMAN	20.9195	20.5609	18.2982	20.1752	20.5812	19.7025	20.9177	21.0347	20.8183	21.3134	20.6866	20.1243	20.6604	20.203	20.2759	20.9372	20.7957	20.3661	20.2102	20.5552	sp|Q14574|DSC3_HUMAN
sp|Q14624|ITIH4_HUMAN	11.3259	NA	NA	11.8445	NA	12.683	11.5776	13.1428	11.9419	NA	NA	NA	NA	NA	NA	11.2415	NA	NA	NA	NA	sp|Q14624|ITIH4_HUMAN
sp|Q14689|DIP2A_HUMAN	10.0988	9.33536	10.0494	9.93215	9.9395	10.5606	10.6869	9.37748	10.752	NA	10.6488	NA	10.1781	9.90435	10.1474	11.5448	9.65122	9.5966	9.76217	9.82045	sp|Q14689|DIP2A_HUMAN
sp|Q14697|GANAB_HUMAN	8.98491	9.21786	10.2932	9.09946	NA	10.2064	10.6149	14.1745	11.1069	9.69079	9.33748	8.9541	12.0976	9.47485	8.94038	11.6926	8.99065	8.36607	11.5182	9.2274	sp|Q14697|GANAB_HUMAN
sp|Q14764|MVP_HUMAN	11.604	NA	13.8655	NA	14.6928	15.4775	11.2596	12.1957	11.0339	NA	NA	12.0426	12.2846	13.945	14.3532	11.6825	NA	11.5863	NA	14.6721	sp|Q14764|MVP_HUMAN
sp|Q14956|GPNMB_HUMAN	17.2363	18.2571	17.7065	18.2854	17.4029	17.5491	18.1319	19.3551	19.2276	16.3234	18.1016	17.628	17.4154	18.2166	17.4368	18.0318	17.455	17.7649	16.5025	18.0314	sp|Q14956|GPNMB_HUMAN
sp|Q14974|IMB1_HUMAN	9.92623	10.455	11.5111	9.19575	NA	10.694	10.0811	13.261	11.5988	11.0363	NA	10.2472	NA	15.9129	NA	10.7781	12.0813	10.5229	10.5685	9.7986	sp|Q14974|IMB1_HUMAN
sp|Q14CN4|K2C72_HUMAN	8.8268	14.5963	14.6768	12.3439	13.8505	13.334	9.97691	13.9709	11.8193	11.2342	15.2149	12.2388	15.6887	15.3409	12.0801	15.2116	15.0173	16.3459	16.4559	10.5203	sp|Q14CN4|K2C72_HUMAN
sp|Q15018|ABRX2_HUMAN	12.927	12.5867	13.2444	13.9126	13.7165	13.8436	12.7774	13.4495	13.8359	12.8737	14.3589	13.6004	14.426	14.5926	13.5596	13.8845	13.8396	14.4232	13.9502	14.0371	sp|Q15018|ABRX2_HUMAN
sp|Q15067|ACOX1_HUMAN	12.3234	10.8143	13.048	12.9141	12.2783	11.3504	12.3951	13.5619	13.3913	13.2367	11.0694	11.1684	12.1116	13.2233	12.1238	13.3244	11.9132	11.5053	13.2816	13.4862	sp|Q15067|ACOX1_HUMAN
sp|Q15121|PEA15_HUMAN	9.85098	NA	NA	NA	NA	9.65179	NA	13.2733	10.436	10.7218	9.68285	NA	10.0375	NA	NA	NA	NA	NA	NA	10.1108	sp|Q15121|PEA15_HUMAN
sp|Q15125|EBP_HUMAN	NA	NA	10.1321	NA	NA	11.1404	10.363	10.7232	12.0427	NA	NA	10.4329	NA	10.5281	10.7371	NA	NA	11.2843	10.5927	NA	sp|Q15125|EBP_HUMAN
sp|Q15149|PLEC_HUMAN	18.9466	19.4715	20.0903	19.6245	18.5539	19.8626	20.0151	19.8652	19.6066	19.804	19.366	19.7255	19.9162	19.7663	20.031	20.0899	20.066	18.7242	20.3342	19.2529	sp|Q15149|PLEC_HUMAN
sp|Q15165|PON2_HUMAN	11.0494	NA	10.9699	10.3275	10.0123	11.176	10.1398	11.5576	11.8578	11.3816	10.7613	11.3777	10.4558	12.2481	10.6868	10.3003	10.0395	10.0803	NA	10.4723	sp|Q15165|PON2_HUMAN
sp|Q15166|PON3_HUMAN	13.3725	13.4007	NA	NA	NA	14.0805	14.1463	NA	12.9634	NA	13.6999	NA	NA	14.6015	NA	NA	13.4431	NA	NA	13.5488	sp|Q15166|PON3_HUMAN
sp|Q15181|IPYR_HUMAN	14.2643	13.3983	13.0879	13.3383	14.3539	14.2032	14.8005	14.142	13.7337	NA	13.2115	15.203	13.7126	15.2595	14.9655	15.1225	13.1022	NA	13.9995	14.6879	sp|Q15181|IPYR_HUMAN
sp|Q15323|K1H1_HUMAN	16.2949	19.4442	19.16	18.4311	18.8816	19.0923	16.8375	20.0803	17.4359	17.1675	20.5482	17.2943	20.0562	19.5777	16.5462	20.0278	19.9183	21.3746	21.1785	16.89	sp|Q15323|K1H1_HUMAN
sp|Q15363|TMED2_HUMAN	17.3705	16.9883	16.5614	16.6694	17.0553	17.0234	16.9618	17.4294	17.8967	17.2224	17.3171	17.4945	17.7277	17.6195	17.4559	17.7652	17.3798	16.7519	17.0052	17.5787	sp|Q15363|TMED2_HUMAN
sp|Q15365|PCBP1_HUMAN	12.3197	11.944	11.9641	10.3079	NA	12.1289	12.043	14.9021	13.1855	12.2566	10.5594	11.263	11.2372	11.1683	11.6501	12.3855	11.2666	12.8424	12.1096	12.3054	sp|Q15365|PCBP1_HUMAN
sp|Q15392|DHC24_HUMAN	NA	NA	NA	NA	NA	NA	NA	NA	12.7511	NA	10.7201	12.2911	NA	12.5267	12.275	13.4356	11.2997	12.8844	12.0267	11.1511	sp|Q15392|DHC24_HUMAN
sp|Q15459|SF3A1_HUMAN	10.3538	10.1128	10.4293	11.0612	10.8035	11.2909	10.0892	10.9463	11.8981	11.3775	11.8145	10.36	11.166	11.4237	11.2067	11.1531	9.99876	10.8766	11.0597	11.3656	sp|Q15459|SF3A1_HUMAN
sp|Q15517|CDSN_HUMAN	21.0641	20.7402	18.7228	21.1399	21.6578	20.4168	21.4956	21.5725	21.197	22.6951	21.3897	21.1356	21.5817	20.9297	20.8733	21.7037	21.2086	20.9954	20.8475	21.2338	sp|Q15517|CDSN_HUMAN
sp|Q15631|TSN_HUMAN	NA	NA	NA	NA	NA	12.6106	NA	13.3217	12.0879	NA	NA	NA	NA	10.2346	NA	10.4445	10.3237	NA	NA	11.6286	sp|Q15631|TSN_HUMAN
sp|Q15751|HERC1_HUMAN	NA	NA	NA	NA	NA	NA	NA	16.5676	16.329	NA	16.4371	NA	NA	NA	NA	16.8506	NA	NA	NA	NA	sp|Q15751|HERC1_HUMAN
sp|Q15773|MLF2_HUMAN	12.1566	11.9056	11.8951	11.2042	11.513	11.9819	10.7704	12.6031	12.2134	12.712	11.9812	NA	11.1224	10.6341	11.4273	11.7043	10.7209	11.3846	11.2312	11.8327	sp|Q15773|MLF2_HUMAN
sp|Q15828|CYTM_HUMAN	19.4554	19.0065	17.1259	19.1337	19.6381	18.0408	18.5839	20.7987	19.3772	19.1461	19.7169	18.1003	18.5188	18.8266	17.4536	18.2853	18.2653	18.5474	18.5	18.5386	sp|Q15828|CYTM_HUMAN
sp|Q15904|VAS1_HUMAN	13.8831	14.0669	13.3953	14.3192	13.4661	13.8721	14.6621	14.1224	13.9812	14.1213	13.6294	13.0783	13.5777	13.6692	13.3657	13.8928	13.3674	13.1431	13.694	13.2825	sp|Q15904|VAS1_HUMAN
sp|Q16270|IBP7_HUMAN	NA	NA	NA	10.9281	NA	11.4068	NA	NA	NA	NA	NA	11.0893	NA	9.59255	NA	NA	NA	NA	NA	NA	sp|Q16270|IBP7_HUMAN
sp|Q16401|PSMD5_HUMAN	NA	NA	NA	NA	NA	9.40794	NA	12.2525	10.4388	NA	NA	NA	NA	NA	NA	NA	8.41987	9.85781	7.91067	NA	sp|Q16401|PSMD5_HUMAN
sp|Q16531|DDB1_HUMAN	16.6288	16.2219	16.6525	16.9565	16.3822	16.8773	16.6208	16.575	17.1258	16.7437	16.3884	16.3693	16.4919	16.7168	17.1666	16.6925	16.344	15.9075	16.8718	16.5657	sp|Q16531|DDB1_HUMAN
sp|Q16563|SYPL1_HUMAN	13.7632	13.4665	13.436	12.6629	13.3266	12.855	13.2526	14.0812	14.2676	10.9729	13.1509	13.4618	13.517	12.4785	13.7929	13.1215	12.7594	12.8144	13.3649	12.1637	sp|Q16563|SYPL1_HUMAN
sp|Q16610|ECM1_HUMAN	20.3307	19.5932	19.94	20.4272	19.5378	20.0642	20.3222	19.9029	21.0016	20.0231	20.0583	20.7093	20.3066	20.3976	21.8807	20.7972	20.6194	20.5136	20.8629	21.3119	sp|Q16610|ECM1_HUMAN
sp|Q16651|PRSS8_HUMAN	14.0032	13.6191	12.6087	14.3994	13.2377	12.8692	14.4611	15.537	14.5631	14.6887	13.5642	12.8318	13.8934	13.2958	13.2281	14.3605	14.2725	14.1929	13.8705	13.4799	sp|Q16651|PRSS8_HUMAN
sp|Q16658|FSCN1_HUMAN	10.4033	NA	11.4578	NA	10.6735	10.7603	NA	13.788	14.1389	12.6745	12.1292	9.44976	11.0556	10.9567	12.4962	12.208	12.0952	13.7874	12.4673	10.3022	sp|Q16658|FSCN1_HUMAN
sp|Q16698|DECR_HUMAN	13.2125	13.6478	13.7698	13.2439	13.4182	13.3356	13.3946	13.675	14.1153	12.3739	13.8108	13.1716	14.2769	14.7074	13.243	13.0099	12.9316	12.4618	13.8518	13.0248	sp|Q16698|DECR_HUMAN
sp|Q16706|MA2A1_HUMAN	13.5924	12.8664	12.4007	13.334	13.3844	13.6697	13.0334	13.0756	12.569	13.7745	13.6691	13.9208	14.0455	14.0237	13.8081	13.5146	13.2969	12.4818	12.7659	13.7001	sp|Q16706|MA2A1_HUMAN
sp|Q16740|CLPP_HUMAN	NA	NA	NA	NA	10.6353	NA	NA	12.072	13.2006	NA	13.6067	10.5539	10.2349	NA	NA	NA	NA	10.2398	NA	13.3333	sp|Q16740|CLPP_HUMAN
sp|Q16769|QPCT_HUMAN	13.5504	13.9407	13.9885	14.2632	13.8582	14.5932	13.8306	14.4806	14.6672	14.6347	14.3433	14.7269	14.9358	13.9989	14.9579	14.7027	15.2326	14.5495	14.0285	14.9303	sp|Q16769|QPCT_HUMAN
sp|Q2M2I5|K1C24_HUMAN	13.553	12.9318	13.4881	13.9266	13.214	13.0613	13.8228	13.0574	13.2117	13.2723	13.6201	13.1633	13.1061	12.9043	13.0271	13.1178	12.5231	12.5876	12.4442	13.2771	sp|Q2M2I5|K1C24_HUMAN
sp|Q2QD12|RPEL1_HUMAN	NA	NA	NA	11.3152	10.9552	11.3817	10.1926	11.6081	11.8984	12.298	11.9971	11.8553	11.8076	12.3604	11.3906	11.3867	10.1882	NA	NA	11.5438	sp|Q2QD12|RPEL1_HUMAN;sp|Q96AT9|RPE_HUMAN
sp|Q2TAA2|IAH1_HUMAN	10.0487	9.32355	12.7641	10.243	11.2073	11.0925	10.5515	11.7237	12.7023	8.63673	NA	10.036	9.82325	NA	10.6716	10.7918	NA	NA	NA	NA	sp|Q2TAA2|IAH1_HUMAN
sp|Q2TAY7|SMU1_HUMAN	13.103	13.3757	14.7864	14.2638	14.9303	15.0702	14.2419	13.729	14.7674	14.1453	12.7687	13.2389	12.2899	13.2302	14.7631	13.3993	11.4953	13.814	12.7497	13.2378	sp|Q2TAY7|SMU1_HUMAN
sp|Q31612|1B73_HUMAN	NA	NA	11.2202	NA	12.4973	12.3167	13.9272	12.5416	12.0027	NA	11.8358	NA	11.5948	11.9288	NA	12.387	12.2251	NA	NA	11.4438	sp|Q31612|1B73_HUMAN
sp|Q3MJ16|PA24E_HUMAN	10.2875	11.723	10.3253	10.2442	11.3224	12.3784	11.7636	11.7166	11.7582	12.1757	11.6445	10.0187	10.3017	12.155	10.172	10.7186	10.4517	10.1383	9.83903	9.8537	sp|Q3MJ16|PA24E_HUMAN
sp|Q3SY77|UD3A2_HUMAN	NA	NA	NA	NA	NA	10.3878	11.5861	8.50004	NA	13.7018	NA	8.08437	8.75985	11.2688	NA	NA	NA	NA	NA	NA	sp|Q3SY77|UD3A2_HUMAN
sp|Q3SY84|K2C71_HUMAN	9.44716	11.9591	12.4805	10.9357	11.1501	17.4061	11.3764	10.0748	9.61129	12.4664	10.7573	9.81774	13.1562	10.7099	10.7952	17.4058	16.9902	13.7644	11.1241	17.3296	sp|Q3SY84|K2C71_HUMAN
sp|Q3ZCW2|LEGL_HUMAN	12.08	9.60091	10.8166	13.4841	12.06	10.986	10.7936	14.1433	15.4594	14.7259	15.0526	10.0796	12.9501	13.1604	14.1653	13.708	12.6932	15.933	14.5349	13.104	sp|Q3ZCW2|LEGL_HUMAN
sp|Q4G0F5|VP26B_HUMAN	NA	NA	NA	NA	NA	12.2916	NA	10.7238	13.0678	9.04953	NA	NA	NA	NA	13.5101	11.6578	NA	NA	NA	9.79643	sp|Q4G0F5|VP26B_HUMAN
sp|Q52LG2|KR132_HUMAN	NA	NA	NA	NA	NA	13.5627	NA	13.8541	NA	NA	14.3818	11.7593	14.331	NA	12.4307	13.4315	13.7208	14.8969	13.5401	NA	sp|Q52LG2|KR132_HUMAN
sp|Q52LW3|RHG29_HUMAN	16.0443	16.2034	15.4181	16.0599	15.8114	15.8926	15.7357	14.6639	15.4648	14.7817	16.0441	15.9292	16.1617	16.3411	16.3168	15.7802	15.4961	14.8714	15.978	15.6776	sp|Q52LW3|RHG29_HUMAN
sp|Q53FA7|QORX_HUMAN	NA	NA	13.2449	NA	NA	NA	NA	NA	13.8012	NA	NA	NA	NA	12.9159	13.1301	NA	NA	NA	NA	NA	sp|Q53FA7|QORX_HUMAN
sp|Q53GQ0|DHB12_HUMAN	NA	NA	NA	NA	NA	10.4429	NA	12.374	11.9395	NA	NA	NA	NA	10.1337	NA	NA	NA	NA	NA	NA	sp|Q53GQ0|DHB12_HUMAN
sp|Q53H96|P5CR3_HUMAN	10.7216	9.95374	11.1947	12.0086	12.5663	12.6729	10.001	11.1179	13.028	13.6353	12.2255	12.2771	12.0704	11.743	13.265	12.8476	11.8603	11.6283	12.5151	11.8988	sp|Q53H96|P5CR3_HUMAN
sp|Q53RT3|APRV1_HUMAN	18.1713	17.6354	16.9232	17.9719	17.0982	17.0009	17.6676	21.0461	21.0189	19.5473	19.9025	17.0873	19.2686	18.0352	17.6259	18.4181	17.6676	19.8187	18.1342	18.3787	sp|Q53RT3|APRV1_HUMAN
sp|Q562R1|ACTBL_HUMAN	18.6706	17.9186	18.0058	NA	18.0549	18.594	18.1436	NA	19.7599	18.7668	17.4754	17.1098	17.9286	NA	18.1987	18.6513	18.4739	19.4254	18.372	NA	sp|Q562R1|ACTBL_HUMAN
sp|Q56A73|SPIN4_HUMAN	11.3134	9.62616	10.0338	9.90141	10.33	11.2141	10.1708	11.5147	9.72348	11.5023	9.88922	8.7215	NA	8.86415	9.57291	10.506	9.40609	11.4428	10.0878	10.3254	sp|Q56A73|SPIN4_HUMAN
sp|Q5BJH7|YIF1B_HUMAN	NA	NA	NA	NA	NA	NA	NA	9.29166	NA	NA	10.118	10.741	NA	NA	9.77281	NA	NA	NA	NA	NA	sp|Q5BJH7|YIF1B_HUMAN
sp|Q5D862|FILA2_HUMAN	23.1073	23.2322	23.9201	23.303	23.653	23.9748	23.6014	24.0907	24.9092	24.1415	23.017	24.3759	24.5859	24.2109	23.3652	23.689	24.4028	22.6527	24.2409	23.9581	sp|Q5D862|FILA2_HUMAN
sp|Q5JS37|NHLC3_HUMAN	13.0076	12.8017	13.517	13.1532	12.9674	13.0716	12.7051	12.9902	12.5295	13.3781	13.0737	12.8923	13.0327	13.1527	12.9997	13.0224	12.3774	NA	12.4826	13.2542	sp|Q5JS37|NHLC3_HUMAN
sp|Q5MNZ6|WIPI3_HUMAN	NA	NA	11.5668	NA	NA	12.1875	NA	NA	11.2638	10.9713	11.5164	11.843	11.9259	11.6941	12.3716	11.5122	NA	NA	11.4593	11.5062	sp|Q5MNZ6|WIPI3_HUMAN
sp|Q5T013|HYI_HUMAN	14.1501	14.5951	15.8402	15.56	14.9454	15.8353	14.9181	15.1168	14.7882	16.0389	15.8409	15.3216	15.5046	16.0394	15.6157	15.6833	15.6742	14.3097	15.7752	15.7762	sp|Q5T013|HYI_HUMAN
sp|Q5T1M5|FKB15_HUMAN	15.7421	15.9837	16.3284	16.4623	16.0668	16.1282	15.6818	15.5172	16.3896	15.7329	16.4623	16.0014	15.7184	15.686	15.7718	15.3402	16.1508	15.8243	15.3015	15.433	sp|Q5T1M5|FKB15_HUMAN
sp|Q5T5C0|STXB5_HUMAN	14.8269	14.9044	15.4262	14.4474	13.8838	14.0337	14.4374	14.9367	15.1844	14.9046	15.3867	15.2804	15.2228	14.4633	14.9418	14.738	15.2285	13.5213	14.6353	15.4269	sp|Q5T5C0|STXB5_HUMAN
sp|Q5T749|KPRP_HUMAN	18.2473	17.8871	17.7419	18.5812	17.7462	18.0628	18.7461	19.0813	19.3789	19.2543	18.6544	18.7333	18.915	18.3108	18.8087	18.2811	18.4272	17.2056	18.8413	18.043	sp|Q5T749|KPRP_HUMAN
sp|Q5T750|XP32_HUMAN	17.0968	17.3776	16.1265	15.4385	14.7481	15.8417	16.3455	16.8991	18.5142	16.6283	15.969	16.605	16.6541	16.0903	15.7255	16.3723	15.825	14.4934	15.3525	15.867	sp|Q5T750|XP32_HUMAN
sp|Q5T8D3|ACBD5_HUMAN	NA	10.236	11.0868	11.5463	NA	11.3787	NA	11.391	12.1238	NA	11.6154	11.1494	11.0628	12.8971	11.9365	12.3547	12.2935	10.9588	11.3609	13.5329	sp|Q5T8D3|ACBD5_HUMAN
sp|Q5TZA2|CROCC_HUMAN	12.9652	11.8218	12.9929	12.7809	NA	12.6091	12.7066	14.4828	13.7579	11.4382	12.6314	NA	12.7669	12.4934	12.5708	12.5236	12.8071	12.5964	11.3702	11.214	sp|Q5TZA2|CROCC_HUMAN
sp|Q5UCC4|EMC10_HUMAN	12.7952	11.7336	13.8591	14.2061	13.8545	14.1444	13.0818	14.3946	14.6816	14.5631	13.8102	13.939	14.0986	14.4334	14.7933	14.6361	14.2524	13.8557	14.6307	14.9096	sp|Q5UCC4|EMC10_HUMAN
sp|Q5VT79|AXA81_HUMAN	11.1767	10.0758	11.5363	10.5535	10.6013	10.987	10.8898	14.2113	14.1077	12.0342	12.3168	10.7462	11.4774	12.4286	10.2572	10.9886	11.4347	12.7327	11.4805	12.1779	sp|Q5VT79|AXA81_HUMAN
sp|Q5VTQ0|TT39B_HUMAN	NA	NA	NA	NA	NA	NA	NA	11.2291	10.4422	NA	NA	9.99348	NA	NA	NA	NA	9.87465	NA	NA	9.21108	sp|Q5VTQ0|TT39B_HUMAN
sp|Q5VVQ6|OTU1_HUMAN	12.7295	11.5779	11.7392	10.8906	11.5856	12.3527	11.7127	13.8255	12.3531	12.4349	11.5458	11.4952	11.5378	11.6874	11.5682	11.9187	11.3122	12.9452	11.5577	12.4911	sp|Q5VVQ6|OTU1_HUMAN
sp|Q5XG92|EST4A_HUMAN	11.3716	13.0612	11.5738	13.1331	NA	NA	11.871	12.4294	13.0381	NA	12.9851	11.5301	11.6395	13.5163	13.255	13.241	11.8959	11.4518	11.5383	NA	sp|Q5XG92|EST4A_HUMAN
sp|Q5XKE5|K2C79_HUMAN	17.5561	15.8703	14.3351	17.4699	16.8005	16.8634	16.0909	15.6772	17.5738	14.2651	14.338	14.622	14.9221	16.8255	14.7216	15.5744	17.6997	16.9713	16.0907	14.3779	sp|Q5XKE5|K2C79_HUMAN
sp|Q641Q3|METRL_HUMAN	NA	NA	NA	NA	NA	NA	NA	NA	15.3732	14.5278	NA	NA	NA	NA	NA	NA	NA	NA	NA	NA	sp|Q641Q3|METRL_HUMAN
sp|Q68D91|MBLC2_HUMAN	NA	NA	10.9309	10.2852	NA	10.3434	NA	11.6655	11.0915	NA	NA	NA	11.0912	10.7273	10.9649	10.7809	NA	NA	8.07595	11.5494	sp|Q68D91|MBLC2_HUMAN
sp|Q6A163|K1C39_HUMAN	NA	11.74	10.6324	NA	11.0107	NA	NA	11.8596	10.1116	NA	11.9612	NA	11.4352	12.0829	NA	12.0787	12.238	14.2369	12.8582	NA	sp|Q6A163|K1C39_HUMAN
sp|Q6BCY4|NB5R2_HUMAN	NA	NA	7.99696	11.3718	NA	NA	NA	NA	16.0604	11.8867	12.8469	10.8313	12.696	12.8785	13.0541	13.9174	7.91963	11.2252	11.6623	11.5252	sp|Q6BCY4|NB5R2_HUMAN
sp|Q6DD88|ATLA3_HUMAN	NA	NA	13.9428	NA	NA	14.4847	12.3952	NA	14.7338	11.5944	NA	14.6564	14.6636	14.5155	14.2012	NA	NA	NA	14.0332	NA	sp|Q6DD88|ATLA3_HUMAN
sp|Q6E0U4|DMKN_HUMAN	16.846	17.7687	14.0227	14.7455	17.1087	16.2508	15.6401	17.0561	17.779	16.1367	17.6812	17.0615	18.2061	15.9826	15.4775	17.2128	15.3238	13.679	16.6819	16.6302	sp|Q6E0U4|DMKN_HUMAN
sp|Q6IA69|NADE_HUMAN	12.4072	NA	11.8762	12.2907	11.9399	11.8496	11.675	NA	13.1149	10.7584	12.5088	11.8074	12.501	11.4961	13.2803	11.9738	9.91533	10.41	NA	10.5794	sp|Q6IA69|NADE_HUMAN
sp|Q6KB66|K2C80_HUMAN	22.235	21.8934	22.3829	21.8697	22.3436	22.3545	22.3781	21.9415	21.854	21.4875	21.6161	21.9775	22.0494	21.8527	22.2031	22.0462	22.1087	21.3086	21.8058	21.8399	sp|Q6KB66|K2C80_HUMAN
sp|Q6MZM0|HPHL1_HUMAN	NA	NA	NA	NA	NA	NA	NA	11.6238	NA	NA	NA	NA	NA	NA	NA	NA	NA	NA	10.6611	NA	sp|Q6MZM0|HPHL1_HUMAN
sp|Q6N075|MFSD5_HUMAN	14.9762	15.4753	13.3666	15.1567	12.6481	14.3895	14.0996	14.5288	15.4888	NA	14.4687	15.1406	14.2902	14.5644	15.1658	14.1293	14.1832	14.0871	15.3601	14.2259	sp|Q6N075|MFSD5_HUMAN
sp|Q6NUJ1|SAPL1_HUMAN	17.5169	18.2947	15.2962	18.2152	14.5419	18.2876	15.9332	16.7434	17.4247	17.205	14.8432	16.5388	20.7826	17.9593	14.468	14.6489	18.2769	19.069	16.0287	19.7036	sp|Q6NUJ1|SAPL1_HUMAN
sp|Q6P093|ADCL2_HUMAN	12.2886	12.6965	12.2635	12.5041	12.0013	12.3954	12.5539	12.6986	13.1487	12.1711	13.3264	12.9931	12.5879	12.7725	11.8427	12.2337	12.3426	12.1023	13.3895	11.831	sp|Q6P093|ADCL2_HUMAN
sp|Q6P1J6|PLB1_HUMAN	14.0092	14.1752	15.6624	15.382	15.6246	15.178	14.7491	15.6885	16.0385	16.918	16.3595	14.2403	16.0128	15.856	16.5709	16.4586	16.4099	15.3654	15.7753	15.984	sp|Q6P1J6|PLB1_HUMAN
sp|Q6P1M0|S27A4_HUMAN	NA	NA	NA	9.44955	NA	NA	5.7734	7.93029	9.81471	NA	NA	NA	NA	9.69039	NA	NA	NA	7.50892	5.45121	NA	sp|Q6P1M0|S27A4_HUMAN
sp|Q6P1N9|TATD1_HUMAN	12.3724	11.9168	13.7937	12.788	13.0865	14.0549	12.0877	12.971	14.4112	13.6862	13.0602	13.6488	14.1302	14.2324	13.9688	13.5256	13.3874	12.8185	13.505	13.9668	sp|Q6P1N9|TATD1_HUMAN
sp|Q6P4A8|PLBL1_HUMAN	17.4137	17.5585	17.6165	17.0494	16.7925	16.7161	16.8195	17.4089	17.4485	16.8838	17.4987	16.3202	17.2067	17.4088	17.239	16.9032	17.4473	16.9336	16.9021	17.4901	sp|Q6P4A8|PLBL1_HUMAN
sp|Q6P4Q7|CNNM4_HUMAN	NA	NA	NA	NA	NA	NA	12.734	13.1206	11.7391	12.3674	14.0444	11.8344	12.38	11.6609	12.3345	11.9378	NA	12.1512	11.531	12.7117	sp|Q6P4Q7|CNNM4_HUMAN
sp|Q6P587|FAHD1_HUMAN	13.8227	13.6144	14.2935	14.2786	13.5612	14.6061	13.22	14.576	14.304	14.0566	14.1004	13.2568	14.6457	14.232	14.2476	13.9754	14.2791	13.3867	13.9634	14.4692	sp|Q6P587|FAHD1_HUMAN
sp|Q6UVW9|CLC2A_HUMAN	13.7512	13.5002	12.5106	13.06	12.0888	12.1727	13.7698	12.263	14.0759	12.5893	14.3775	13.7103	13.0369	13.7711	13.1526	12.2995	12.3165	12.6859	13.1133	13.031	sp|Q6UVW9|CLC2A_HUMAN
sp|Q6UW68|TM205_HUMAN	14.3922	14.0448	14.3405	14.8429	14.2223	14.5493	13.7639	14.9883	14.8774	11.1466	13.9215	14.1116	13.9472	14.4218	14.5926	14.3939	14.206	15.1413	14.7852	14.3957	sp|Q6UW68|TM205_HUMAN
sp|Q6UWN5|LYPD5_HUMAN	12.5171	NA	NA	NA	10.0297	NA	NA	12.9242	11.8517	10.7379	NA	NA	11.226	NA	9.29494	11.7919	10.4181	11.2757	NA	NA	sp|Q6UWN5|LYPD5_HUMAN
sp|Q6UWP2|DHR11_HUMAN	11.3899	11.7644	15.3517	13.4521	14.8204	14.1776	11.5553	13.038	16.1262	14.4439	13.0596	11.9637	12.8346	13.7952	15.5927	13.9857	11.649	14.5251	15.8395	11.4829	sp|Q6UWP2|DHR11_HUMAN
sp|Q6UWP8|SBSN_HUMAN	19.3547	19.7413	17.7189	19.6955	19.4804	19.6795	18.8518	21.1391	20.434	21.0363	20.0639	19.7559	19.4041	19.7648	19.5712	19.9406	19.2522	19.9717	19.9984	19.5046	sp|Q6UWP8|SBSN_HUMAN
sp|Q6UWV2|MPZL3_HUMAN	12.433	11.973	NA	12.8466	NA	NA	NA	12.8099	12.6307	NA	12.4891	NA	NA	12.5333	12.4774	NA	11.5201	12.6116	13.3259	NA	sp|Q6UWV2|MPZL3_HUMAN
sp|Q6XPR3|RPTN_HUMAN	13.716	12.4874	11.9969	13.4282	NA	10.3112	13.5425	12.5224	11.8635	11.0425	11.1063	10.5215	11.0897	NA	NA	NA	NA	NA	NA	NA	sp|Q6XPR3|RPTN_HUMAN
sp|Q6XQN6|PNCB_HUMAN	11.4986	11.0762	10.7832	NA	11.1558	11.2667	10.3021	14.6662	13.9206	13.5649	10.6232	11.6635	11.1702	10.4228	11.7497	12.8674	11.4763	13.8188	12.4977	11.6693	sp|Q6XQN6|PNCB_HUMAN
sp|Q6YHK3|CD109_HUMAN	12.7683	10.3046	12.7141	NA	10.9222	10.4183	NA	13.2995	13.5402	12.6598	10.7309	11.5166	10.9272	13.0533	12.1767	12.1999	11.0854	11.5554	10.9644	10.9662	sp|Q6YHK3|CD109_HUMAN
sp|Q6ZNA5|FRRS1_HUMAN	13.9476	14.6498	14.6296	14.5315	14.2487	14.9746	13.6202	15.1263	15.1539	15.6398	15.0214	14.4025	15.147	14.8766	14.771	14.8305	14.9601	14.3462	14.6985	15.639	sp|Q6ZNA5|FRRS1_HUMAN
sp|Q6ZNF0|ACP7_HUMAN	13.4222	13.1449	12.8459	13.2321	14.0814	13.6077	12.8724	14.7607	14.9487	13.5912	14.8429	13.706	14.2994	14.3029	14.6463	14.5194	13.9168	14.4963	14.3933	14.1873	sp|Q6ZNF0|ACP7_HUMAN
sp|Q6ZRV2|FA83H_HUMAN	10.326	NA	9.36071	NA	10.4195	NA	NA	12.1084	10.3815	NA	NA	NA	13.0074	NA	NA	NA	NA	NA	NA	NA	sp|Q6ZRV2|FA83H_HUMAN
sp|Q6ZT21|TMPPE_HUMAN	NA	NA	NA	11.6459	NA	10.4145	NA	12.135	11.6582	NA	10.8847	10.9512	9.56803	10.5925	8.60608	12.0503	9.73539	10.9889	11.4008	10.7839	sp|Q6ZT21|TMPPE_HUMAN
sp|Q6ZVX7|FBX50_HUMAN	17.8791	18.5315	17.5874	17.1784	17.3959	17.9914	17.7587	18.5925	18.4811	17.3254	17.7096	17.5299	17.8422	18.4325	17.1909	17.8563	17.1885	17.7902	17.1854	18.0021	sp|Q6ZVX7|FBX50_HUMAN
sp|Q6ZWK6|TM11F_HUMAN	NA	NA	NA	NA	NA	NA	NA	NA	11.7073	10.3313	NA	NA	11.8463	9.5816	NA	11.2985	10.5231	NA	11.3195	NA	sp|Q6ZWK6|TM11F_HUMAN
sp|Q6ZWT7|MBOA2_HUMAN	NA	13.4557	13.051	14.3463	12.8055	13.2784	13.7836	13.9915	14.6728	NA	11.676	13.827	11.8448	14.1535	13.4051	13.5867	13.3986	NA	14.1386	12.7696	sp|Q6ZWT7|MBOA2_HUMAN
sp|Q6ZXV5|TMTC3_HUMAN	NA	11.4251	13.0514	NA	11.8189	NA	11.6532	11.4254	13.357	NA	11.321	11.758	12.7675	13.0773	13.146	11.431	11.7154	10.8359	13.0063	11.5558	sp|Q6ZXV5|TMTC3_HUMAN
sp|Q719H9|KCTD1_HUMAN	11.8695	9.99019	11.1217	11.5957	11.2625	12.2528	11.4448	11.1782	12.0572	11.5812	12.3903	11.7602	11.8734	12.0204	13.1424	12.3948	11.4909	11.6058	11.5069	12.1855	sp|Q719H9|KCTD1_HUMAN
sp|Q7KZF4|SND1_HUMAN	NA	NA	NA	NA	NA	NA	NA	12.9055	10.7209	NA	NA	NA	NA	NA	NA	NA	NA	NA	NA	NA	sp|Q7KZF4|SND1_HUMAN
sp|Q7L576|CYFP1_HUMAN	14.3685	14.3799	NA	13.8951	11.9436	7.6857	NA	13.0236	9.38068	10.4325	NA	13.4561	13.8498	10.9308	14.6023	10.6483	9.73839	NA	13.9003	12.4533	sp|Q7L576|CYFP1_HUMAN
sp|Q7L5L3|GDPD3_HUMAN	17.2649	17.5192	17.0239	17.8592	16.8745	17.1383	17.4278	17.4055	17.4379	15.2113	17.5072	17.189	17.2398	17.2765	17.665	17.0043	17.4872	17.7811	17.6485	17.001	sp|Q7L5L3|GDPD3_HUMAN
sp|Q7Z2K6|ERMP1_HUMAN	13.8197	13.8419	14.0202	14.0066	13.7879	13.9462	14.1486	13.8649	14.6104	12.0932	14.4818	14.578	14.4737	14.9083	14.9618	14.1452	14.1857	13.7703	14.8319	14.0161	sp|Q7Z2K6|ERMP1_HUMAN
sp|Q7Z3Y8|K1C27_HUMAN	NA	11.097	10.1051	10.8458	10.6287	9.68851	NA	10.5182	10.613	11.6034	NA	NA	NA	NA	9.90965	11.2463	NA	13.6391	11.3463	11.7796	sp|Q7Z3Y8|K1C27_HUMAN
sp|Q7Z3Z0|K1C25_HUMAN	10.2866	10.1837	10.1295	11.2805	10.1393	10.3251	11.5421	NA	9.15818	10.6546	NA	10.3808	10.1342	NA	9.14815	9.54155	8.2953	13.9365	NA	12.4501	sp|Q7Z3Z0|K1C25_HUMAN
sp|Q7Z406|MYH14_HUMAN	13.7781	13.2256	8.9714	12.354	12.6059	13.9574	NA	12.7233	11.3733	9.49829	11.0508	12.6311	8.41562	NA	7.37729	10.9964	12.0739	14.7266	10.3718	13.5892	sp|Q7Z406|MYH14_HUMAN
sp|Q7Z4W1|DCXR_HUMAN	15.0128	14.1906	15.703	14.4505	12.4869	12.1603	14.5858	14.7498	15.6976	14.4417	15.3732	14.3508	14.9964	15.5568	15.6246	13.5687	14.4696	15.0538	15.5803	14.26	sp|Q7Z4W1|DCXR_HUMAN
sp|Q7Z794|K2C1B_HUMAN	24.9003	25.5881	25.4997	24.8093	24.7612	25.2108	25.4467	24.8517	24.4588	24.4932	23.4875	25.0109	24.9212	24.4928	25.3171	25.1554	24.5281	23.2643	24.8827	25.1015	sp|Q7Z794|K2C1B_HUMAN
sp|Q7Z7H5|TMED4_HUMAN	11.4692	12.0423	11.9279	12.0965	11.616	11.2622	12.3562	12.8867	13.0289	10.7473	12.6225	11.9584	12.9076	12.6013	12.5499	12.1736	12.0033	11.1197	12.184	12.7625	sp|Q7Z7H5|TMED4_HUMAN
sp|Q86SG5|S1A7A_HUMAN	14.9251	16.4513	15.4361	14.8831	15.7638	15.4306	14.6105	16.9355	15.0799	15.3817	14.895	15.0797	15.2052	15.2588	14.2554	15.8465	16.2545	17.3613	16.5378	16.6921	sp|Q86SG5|S1A7A_HUMAN
sp|Q86SJ6|DSG4_HUMAN	NA	NA	11.1473	11.3343	11.282	10.8455	NA	12.1735	11.3884	NA	11.9998	NA	11.5649	11.8678	NA	11.9372	11.6865	13.6048	16.1826	11.3227	sp|Q86SJ6|DSG4_HUMAN
sp|Q86TM6|SYVN1_HUMAN	10.8597	12.3681	11.6567	13.3494	NA	11.7439	NA	12.3175	13.3311	NA	12.195	12.1029	12.181	12.5308	12.8209	11.8275	12.076	NA	13.4824	12.2821	sp|Q86TM6|SYVN1_HUMAN
sp|Q86UK0|ABCAC_HUMAN	12.3078	13.0257	10.6273	12.8426	11.2438	12.3043	12.6094	13.1074	13.478	13.3713	12.173	12.1965	12.5393	13.2414	11.8152	12.9337	12.6532	11.5158	12.0305	12.481	sp|Q86UK0|ABCAC_HUMAN
sp|Q86VP6|CAND1_HUMAN	NA	NA	NA	NA	NA	5.05254	NA	11.1677	5.45716	NA	4.14417	NA	NA	NA	NA	4.03155	NA	NA	NA	NA	sp|Q86VP6|CAND1_HUMAN
sp|Q86VR7|VS10L_HUMAN	13.4776	13.4645	14.331	13.6845	NA	13.8146	14.4007	NA	12.9217	NA	NA	12.432	NA	NA	NA	NA	NA	NA	NA	NA	sp|Q86VR7|VS10L_HUMAN
sp|Q86W26|NAL10_HUMAN	NA	NA	NA	NA	NA	NA	NA	13.7369	NA	NA	NA	NA	NA	NA	10.5496	NA	NA	11.8282	NA	NA	sp|Q86W26|NAL10_HUMAN
sp|Q86WC4|OSTM1_HUMAN	14.0472	13.4273	13.3117	13.594	13.4546	13.558	14.1261	13.3696	12.8532	14.0974	13.7874	13.8856	14.0648	13.3351	NA	12.852	13.4835	13.5956	NA	14.2797	sp|Q86WC4|OSTM1_HUMAN
sp|Q86X29|LSR_HUMAN	13.789	13.9476	13.333	14.1241	13.7348	13.7682	14.273	14.0484	13.5312	14.4413	13.6592	13.0875	13.642	14.0194	13.6966	14.4401	13.956	13.0189	13.4553	13.7108	sp|Q86X29|LSR_HUMAN
sp|Q86X76|NIT1_HUMAN	11.8334	10.5048	14.6132	13.5437	12.3187	13.6827	11.6858	14.0053	15.3909	12.8838	12.553	12.4398	11.3179	12.6046	15.028	14.0438	NA	13.0459	11.755	12.8146	sp|Q86X76|NIT1_HUMAN
sp|Q86X83|COMD2_HUMAN	NA	NA	NA	NA	NA	NA	NA	11.6478	NA	7.73801	10.491	NA	NA	9.70413	NA	NA	NA	NA	NA	NA	sp|Q86X83|COMD2_HUMAN
sp|Q86XP0|PA24D_HUMAN	NA	8.79162	NA	NA	NA	NA	NA	12.9243	11.3719	11.8014	NA	NA	NA	NA	NA	NA	NA	NA	NA	NA	sp|Q86XP0|PA24D_HUMAN
sp|Q86Y46|K2C73_HUMAN	19.7243	21.5897	19.7433	19.2835	19.9957	20.3287	20.9716	20.1916	18.351	20.4253	19.8895	20.6644	20.237	19.3939	19.6008	20.1203	19.5718	18.5505	20.119	20.4674	sp|Q86Y46|K2C73_HUMAN
sp|Q86Y82|STX12_HUMAN	12.1846	12.1637	11.3647	12.4091	12.0485	11.8655	12.454	12.5343	12.4482	10.3465	12.8907	12.2408	12.2832	12.4351	12.6184	12.2145	11.6483	12.5495	12.6063	12.1408	sp|Q86Y82|STX12_HUMAN
sp|Q86YZ3|HORN_HUMAN	16.6612	15.1423	15.352	16.1601	16.1001	15.0849	16.4227	15.4562	15.6266	17.2409	15.7744	15.7721	15.9629	15.0961	17.2526	18.022	16.5229	18.1218	17.4605	17.8615	sp|Q86YZ3|HORN_HUMAN
sp|Q86Z20|CC125_HUMAN	14.3908	NA	14.7916	14.7005	15.5037	NA	14.6627	13.731	NA	NA	14.7387	13.9985	NA	13.0456	NA	NA	NA	14.3807	13.6606	NA	sp|Q86Z20|CC125_HUMAN
sp|Q8IUC1|KR111_HUMAN	NA	11.5164	12.1416	11.744	12.6765	12.3909	NA	14.8155	10.5324	9.11888	14.1043	8.19637	14.6045	12.5938	9.90846	14.2527	14.1062	16.0237	14.1887	10.7838	sp|Q8IUC1|KR111_HUMAN
sp|Q8IV08|PLD3_HUMAN	15.9424	17.4144	17.2782	17.1589	17.8066	17.7833	16.9716	17.2342	17.2022	17.3697	17.9963	18.2698	17.351	17.6172	18.3982	17.8205	17.6893	17.4942	18.0786	18.429	sp|Q8IV08|PLD3_HUMAN
sp|Q8IVF2|AHNK2_HUMAN	13.3183	NA	12.9298	13.6273	12.2128	13.1206	NA	14.9432	13.8672	13.2226	13.9108	12.6438	12.993	13.1795	13.3454	13.2626	13.1638	13.2528	13.0038	13.7796	sp|Q8IVF2|AHNK2_HUMAN
sp|Q8IVH8|M4K3_HUMAN	NA	NA	NA	NA	7.96827	8.18842	NA	NA	NA	NA	NA	NA	NA	NA	10.4047	NA	NA	NA	8.94457	NA	sp|Q8IVH8|M4K3_HUMAN
sp|Q8IW45|NNRD_HUMAN	NA	10.5781	11.222	13.6365	10.6643	10.1866	NA	14.1216	15.3607	14.6324	14.6323	11.3333	13.6308	13.4295	14.3528	14.2098	11.7616	10.0415	12.5628	14.4942	sp|Q8IW45|NNRD_HUMAN
sp|Q8IW75|SPA12_HUMAN	20.2204	20.2459	20.2147	20.6846	20.1036	20.5198	19.9621	21.0416	19.7068	20.4859	20.185	19.8224	20.5541	20.5356	20.0096	19.7517	20.1957	19.6855	19.6943	19.9825	sp|Q8IW75|SPA12_HUMAN
sp|Q8IW92|GLBL2_HUMAN	NA	NA	NA	NA	NA	NA	NA	NA	NA	NA	NA	NA	NA	11.1448	NA	NA	NA	NA	9.95048	NA	sp|Q8IW92|GLBL2_HUMAN
sp|Q8IWA5|CTL2_HUMAN	NA	NA	NA	NA	NA	NA	NA	13.3709	NA	NA	13.2776	NA	NA	NA	NA	NA	12.9144	12.515	12.9002	NA	sp|Q8IWA5|CTL2_HUMAN
sp|Q8IXM6|NRM_HUMAN	14.0446	14.7207	11.5164	14.2239	12.9417	13.8208	14.0411	14.2469	14.0812	10.9474	13.3295	14.0599	13.0178	13.7302	14.3728	13.3765	13.5419	13.7002	13.9132	13.3481	sp|Q8IXM6|NRM_HUMAN
sp|Q8IY95|TM192_HUMAN	NA	NA	NA	NA	NA	NA	NA	NA	NA	NA	13.0064	11.9348	NA	13.1865	12.6209	NA	12.1457	NA	12.4537	NA	sp|Q8IY95|TM192_HUMAN
sp|Q8IYS1|P20D2_HUMAN	NA	NA	NA	NA	NA	NA	NA	11.4557	12.8429	NA	NA	NA	NA	NA	NA	NA	11.1288	NA	NA	NA	sp|Q8IYS1|P20D2_HUMAN
sp|Q8IZ83|A16A1_HUMAN	16.1561	14.8545	17.9167	16.984	17.1009	17.2081	16.5715	16.6699	17.7291	17.016	15.5944	16.9862	16.8817	17.0145	18.3097	17.3129	15.8649	15.7189	15.9495	17.068	sp|Q8IZ83|A16A1_HUMAN
sp|Q8IZP0|ABI1_HUMAN	11.1334	11.246	11.2576	NA	11.5326	NA	11.1062	11.9204	10.7485	10.5336	10.391	NA	11.5454	10.4587	12.3744	NA	12.0063	NA	NA	NA	sp|Q8IZP0|ABI1_HUMAN
sp|Q8N0U8|VKORL_HUMAN	13.5541	13.1249	12.6819	13.3238	12.2614	12.8946	13.261	13.3014	14.2705	9.08765	12.8603	12.8646	12.654	13.1448	13.3418	12.8164	12.8332	12.9449	13.6639	13.5337	sp|Q8N0U8|VKORL_HUMAN
sp|Q8N1F8|S11IP_HUMAN	NA	13.2554	12.8724	NA	NA	NA	NA	13.1599	NA	NA	12.9063	NA	13.2447	13.0786	13.1305	15.4435	13.1727	NA	NA	NA	sp|Q8N1F8|S11IP_HUMAN
sp|Q8N1N4|K2C78_HUMAN	24.1608	23.6644	22.8524	23.9177	23.3823	23.9366	23.6859	23.39	23.6068	23.3325	23.6391	23.7345	24.1381	23.9499	24.0958	23.6946	24.0134	23.24	23.5736	23.1317	sp|Q8N1N4|K2C78_HUMAN
sp|Q8N1Q8|ACO15_HUMAN	NA	NA	12.6705	14.3049	14.8597	12.7653	13.3814	12.8006	15.3075	NA	14.0538	13.5747	14.8856	15.5959	15.0758	15.0172	11.8593	13.7053	14.5282	12.3736	sp|Q8N1Q8|ACO15_HUMAN
sp|Q8N3Y7|RDHE2_HUMAN	13.5911	13.3784	13.4477	13.7367	12.8531	13.6842	13.2497	14.3057	14.712	11.8256	13.7196	13.5409	13.8273	13.9055	14.0675	13.7537	13.2232	12.6092	12.743	13.5565	sp|Q8N3Y7|RDHE2_HUMAN
sp|Q8N5K1|CISD2_HUMAN	NA	NA	NA	NA	8.81597	10.6331	NA	10.1834	11.5711	NA	NA	NA	NA	11.0839	10.7105	10.6569	10.5091	NA	NA	11.9832	sp|Q8N5K1|CISD2_HUMAN
sp|Q8N697|S15A4_HUMAN	9.91182	9.33842	9.45091	NA	NA	9.75685	10.5718	10.5009	9.88109	6.58783	9.66179	7.27429	9.25743	NA	8.11315	9.90467	7.04173	9.31084	10.3706	10.2665	sp|Q8N697|S15A4_HUMAN
sp|Q8N6M3|FITM2_HUMAN	13.914	14.8739	13.6313	14.3213	13.4816	14.3988	13.5708	13.5825	14.3006	NA	12.2107	14.2536	12.9744	14.0461	14.4403	13.4305	12.8894	13.8705	14.6502	13.3419	sp|Q8N6M3|FITM2_HUMAN
sp|Q8N766|EMC1_HUMAN	14.5737	14.1363	15.2319	14.3378	14.4572	14.7577	14.7107	14.8145	15.4857	14.4171	14.4085	14.444	14.3909	14.9009	15.245	15.0109	15.1575	14.6205	15.266	14.9094	sp|Q8N766|EMC1_HUMAN
sp|Q8N8D1|PDCD7_HUMAN	NA	NA	NA	NA	NA	NA	NA	11.8917	12.4286	12.3751	NA	10.9868	10.9555	11.2196	NA	12.2898	11.5458	NA	11.9666	12.3803	sp|Q8N8D1|PDCD7_HUMAN
sp|Q8N8N7|PTGR2_HUMAN	NA	NA	NA	NA	NA	NA	NA	NA	NA	NA	10.9188	12.6385	12.7293	12.0316	11.935	13.1182	NA	NA	NA	13.4295	sp|Q8N8N7|PTGR2_HUMAN
sp|Q8NBJ4|GOLM1_HUMAN	11.3697	11.4961	9.05093	12.3362	NA	NA	12.1514	NA	NA	NA	9.37898	NA	NA	NA	NA	NA	NA	NA	NA	NA	sp|Q8NBJ4|GOLM1_HUMAN
sp|Q8NBS3|S4A11_HUMAN	16.784	16.9884	16.9896	17.0606	NA	16.5953	NA	17.1275	16.0157	NA	15.6265	NA	16.996	16.6782	NA	16.0375	15.9737	NA	16.4194	NA	sp|Q8NBS3|S4A11_HUMAN
sp|Q8NCC3|PAG15_HUMAN	NA	NA	NA	NA	NA	NA	NA	11.844	11.3123	10.9179	11.6511	NA	10.7842	NA	10.4768	10.8761	NA	11.1904	NA	11.1309	sp|Q8NCC3|PAG15_HUMAN
sp|Q8NCJ5|SPRY3_HUMAN	12.4269	12.7965	12.1424	13.0609	12.8951	12.8641	12.2298	12.5387	12.8935	12.6362	13.6727	12.14	12.8983	12.5898	12.5324	13.199	12.6766	12.3362	12.7444	12.6931	sp|Q8NCJ5|SPRY3_HUMAN
sp|Q8NCW5|NNRE_HUMAN	16.2713	16.3424	17.6123	17.6756	17.617	18.1179	16.3818	18.244	18.313	18.0201	17.4875	17.5866	17.6984	17.8617	17.7683	17.8723	17.5888	17.0806	17.4732	17.7605	sp|Q8NCW5|NNRE_HUMAN
sp|Q8NDZ4|DIK2A_HUMAN	10.5806	10.7864	10.6968	NA	NA	10.5723	11.4065	11.3267	10.508	10.9394	NA	10.9892	10.8992	11.3004	10.733	11.1734	11.0578	NA	11.5949	11.0313	sp|Q8NDZ4|DIK2A_HUMAN
sp|Q8NEW0|ZNT7_HUMAN	NA	10.577	10.5118	10.8503	10.9457	11.1281	10.6854	11.7446	12.5241	NA	10.9889	11.8045	11.3866	11.5868	12.0239	NA	11.7425	10.8227	11.5947	11.4585	sp|Q8NEW0|ZNT7_HUMAN
sp|Q8NEX9|DR9C7_HUMAN	14.9073	15.1818	14.0497	14.5645	14.101	14.3165	14.9274	15.5627	14.7089	13.4049	15.3213	14.4106	15.039	15.4031	14.7139	14.9801	14.6945	14.7516	14.7134	14.5875	sp|Q8NEX9|DR9C7_HUMAN
sp|Q8NFQ6|BPIFC_HUMAN	7.03565	8.80815	7.40541	7.57657	7.54574	12.2213	7.94102	12.363	8.52663	13.0308	9.65868	7.50994	8.10133	8.06253	7.87071	10.4755	7.72652	6.1029	7.61904	7.92191	sp|Q8NFQ6|BPIFC_HUMAN
sp|Q8NFQ8|TOIP2_HUMAN	NA	14.2467	14.6217	13.4609	14.2939	14.4926	11.8074	12.8746	12.0308	13.798	NA	11.5305	NA	12.6196	NA	12.5056	14.1224	NA	NA	11.0559	sp|Q8NFQ8|TOIP2_HUMAN
sp|Q8NFT8|DNER_HUMAN	12.5059	10.7345	NA	11.3352	NA	9.43367	14.0369	NA	NA	NA	NA	NA	NA	NA	NA	NA	NA	NA	NA	NA	sp|Q8NFT8|DNER_HUMAN
sp|Q8NHP8|PLBL2_HUMAN	16.4493	16.4121	16.3232	16.3973	16.0703	16.5016	16.6539	16.8189	15.99	16.7376	16.5476	15.9523	16.4849	16.2824	15.9411	16.4731	15.8769	15.8208	16.1989	16.3735	sp|Q8NHP8|PLBL2_HUMAN
sp|Q8NI29|FBX27_HUMAN	13.6655	14.1503	14.2712	13.1349	13.4561	14.1916	13.6279	15.198	14.7234	14.2239	13.8996	14.435	14.2162	14.2932	14.9985	14.2263	14.1437	13.4384	14.1547	14.5019	sp|Q8NI29|FBX27_HUMAN
sp|Q8TB96|TIP_HUMAN	10.4232	NA	11.0194	11.715	10.3685	11.0554	12.3495	10.0598	11.3775	9.64412	11.5035	11.3028	10.5479	11.9199	10.9881	10.9122	10.5239	NA	10.7651	10.5232	sp|Q8TB96|TIP_HUMAN
sp|Q8TCJ2|STT3B_HUMAN	10.7651	NA	NA	10.9368	10.8464	9.9475	NA	11.0153	10.8092	NA	10.2971	NA	10.9566	10.7588	10.1613	11.1175	10.5243	NA	NA	10.9192	sp|Q8TCJ2|STT3B_HUMAN
sp|Q8TCT8|SPP2A_HUMAN	NA	NA	NA	NA	12.8665	NA	12.0106	13.5107	13.614	13.716	12.5839	NA	NA	13.0263	NA	NA	NA	12.5351	NA	13.6506	sp|Q8TCT8|SPP2A_HUMAN
sp|Q8TCT9|HM13_HUMAN	13.7825	14.1099	12.947	13.8315	12.706	13.8072	13.3646	14.4364	14.5695	11.1005	14.0395	14.0793	13.1512	14.042	13.2903	13.2179	13.8116	13.7677	14.1764	13.8271	sp|Q8TCT9|HM13_HUMAN
sp|Q8TDL5|BPIB1_HUMAN	13.7988	12.8361	12.7229	13.7597	11.892	13.6347	13.1577	11.7331	11.8375	13.4152	11.7918	12.7448	13.4033	12.7118	12.5346	16.1738	13.4839	12.3563	11.9118	12.5695	sp|Q8TDL5|BPIB1_HUMAN
sp|Q8TDN7|ACER1_HUMAN	15.203	15.5698	16.4524	16.9995	15.5805	16.0646	16.0078	16.1395	17.2579	NA	15.2476	16.1336	16.0525	16.484	16.9239	15.7622	15.6872	15.6901	16.912	15.8998	sp|Q8TDN7|ACER1_HUMAN
sp|Q8TDQ7|GNPI2_HUMAN	13.9221	14.5621	15.8273	15.2654	14.472	15.9906	13.9273	13.8368	16.0842	15.1845	15.0743	15.7854	14.9555	15.2122	16.2754	15.1914	15.0899	15.5225	15.5303	15.2767	sp|Q8TDQ7|GNPI2_HUMAN
sp|Q8TDY2|RBCC1_HUMAN	13.1047	NA	NA	12.1519	NA	NA	14.2777	NA	NA	16.0913	13.2113	NA	NA	15.6966	NA	17.1614	13.0948	NA	NA	15.8521	sp|Q8TDY2|RBCC1_HUMAN
sp|Q8TE68|ES8L1_HUMAN	10.6438	10.1907	12.0805	11.0579	9.56014	10.8455	10.862	12.5027	11.4893	11.1471	10.4372	10.3783	11.0811	10.4896	11.3356	11.1426	10.6866	10.5826	10.2482	11.0403	sp|Q8TE68|ES8L1_HUMAN
sp|Q8TEA8|DTD1_HUMAN	10.3222	9.84278	10.8571	9.76982	9.87817	10.4948	9.88637	10.5493	10.0071	10.3477	10.2919	9.6496	9.88401	10.1066	9.78053	9.81571	9.91236	8.74922	10.0721	9.89591	sp|Q8TEA8|DTD1_HUMAN
sp|Q8TEM1|PO210_HUMAN	NA	NA	NA	NA	NA	NA	NA	NA	10.3407	10.1544	10.7763	NA	NA	NA	NA	NA	NA	11.914	NA	NA	sp|Q8TEM1|PO210_HUMAN
sp|Q8WTW4|NPRL2_HUMAN	17.307	18.1868	18.1739	17.3629	17.123	17.1937	17.4062	16.5332	15.9809	15.8621	17.6492	16.7646	16.6302	15.9768	16.4588	17.506	17.1866	15.4908	17.528	16.0805	sp|Q8WTW4|NPRL2_HUMAN
sp|Q8WUM4|PDC6I_HUMAN	11.0425	13.3618	14.2645	13.1131	12.883	12.6154	12.1891	14.7482	13.9658	13.8439	13.4705	12.8495	13.5769	13.6405	13.2385	12.8849	11.2708	11.6015	12.7868	14.0452	sp|Q8WUM4|PDC6I_HUMAN
sp|Q8WUW1|BRK1_HUMAN	12.8424	10.0216	12.0403	11.0937	12.2945	12.4896	NA	14.1529	12.4695	12.2899	12.2745	9.86448	12.0458	12.049	12.0192	12.9843	11.1039	11.9579	11.7778	13.4377	sp|Q8WUW1|BRK1_HUMAN
sp|Q8WVV4|POF1B_HUMAN	16.4071	15.0201	15.2275	15.1006	15.4508	15.5602	15.0409	18.5952	17.1835	15.8775	14.8243	14.4524	14.5313	14.624	15.0262	16.0861	15.2241	16.4596	15.6969	15.8318	sp|Q8WVV4|POF1B_HUMAN
sp|Q8WW22|DNJA4_HUMAN	NA	NA	NA	NA	12.5168	13.528	NA	NA	NA	NA	NA	NA	NA	NA	NA	NA	NA	NA	NA	NA	sp|Q8WW22|DNJA4_HUMAN
sp|Q8WWA1|TMM40_HUMAN	NA	NA	NA	12.4391	NA	NA	NA	12.704	NA	NA	NA	NA	NA	NA	NA	NA	NA	NA	NA	NA	sp|Q8WWA1|TMM40_HUMAN
sp|Q8WWY7|WFD12_HUMAN	13.2064	12.8929	10.9704	12.6316	10.9213	NA	12.9144	14.5124	9.10102	NA	11.7888	10.8144	12.826	11.8517	12.5614	11.5482	12.2836	12.6075	12.4299	10.6254	sp|Q8WWY7|WFD12_HUMAN
sp|Q8WY22|BRI3B_HUMAN	NA	10.5838	10.5244	12.165	11.161	NA	11.1568	11.7012	13.0462	NA	11.245	12.3308	11.6857	12.3938	11.9818	9.73803	NA	10.3597	11.4762	11.1517	sp|Q8WY22|BRI3B_HUMAN
sp|Q8WZA2|RPGF4_HUMAN	10.458	NA	10.9053	NA	NA	NA	NA	11.1754	NA	NA	NA	NA	11.0428	NA	NA	NA	NA	NA	NA	NA	sp|Q8WZA2|RPGF4_HUMAN
sp|Q92484|ASM3A_HUMAN	14.8894	14.8723	14.4142	13.1967	15.0282	13.8457	13.9221	15.5736	15.4026	14.835	14.6196	14.0238	14.3106	14.264	14.1603	14.4569	14.4484	14.4421	13.9877	14.764	sp|Q92484|ASM3A_HUMAN
sp|Q92506|DHB8_HUMAN	NA	NA	12.7369	13.464	NA	NA	NA	14.2255	13.9425	NA	13.7124	NA	13.9397	14.0315	14.1096	NA	NA	13.5649	13.638	12.8995	sp|Q92506|DHB8_HUMAN
sp|Q92520|FAM3C_HUMAN	12.7117	12.7564	11.5011	12.861	11.9748	12.4231	12.0598	13.1915	13.8682	13.3403	12.9372	12.5284	12.8042	13.1608	12.2704	12.8497	12.3732	12.1234	12.6357	12.4053	sp|Q92520|FAM3C_HUMAN
sp|Q92542|NICA_HUMAN	16.7009	16.6733	16.654	16.4532	15.9319	16.5515	16.8093	17.2723	16.8022	16.0908	16.5613	16.3507	16.5845	16.8068	16.4505	16.2546	16.4337	16.1979	16.4628	16.403	sp|Q92542|NICA_HUMAN
sp|Q92544|TM9S4_HUMAN	15.8199	15.3073	15.1914	15.7815	15.6891	15.7688	16.0818	16.0425	16.3363	15.4531	16.0584	16.0115	16.0553	16.4038	16.3676	16.1377	15.9887	15.424	16.023	15.9272	sp|Q92544|TM9S4_HUMAN
sp|Q92572|AP3S1_HUMAN	NA	NA	NA	NA	NA	NA	NA	11.0276	8.92691	NA	NA	NA	NA	NA	7.70725	NA	NA	NA	NA	NA	sp|Q92572|AP3S1_HUMAN
sp|Q92585|MAML1_HUMAN	14.0235	14.4922	14.0414	14.2867	14.3787	13.9556	14.6114	13.7893	13.2453	14.3398	14.0563	14.2778	14.1162	13.1974	13.6584	13.7967	13.5606	12.9657	13.5256	13.4574	sp|Q92585|MAML1_HUMAN
sp|Q92599|SEPT8_HUMAN	NA	NA	NA	NA	NA	NA	NA	13.2659	12.7912	10.6504	NA	NA	NA	10.0068	NA	10.6166	NA	11.2491	NA	NA	sp|Q92599|SEPT8_HUMAN
sp|Q92616|GCN1_HUMAN	NA	NA	NA	NA	11.3357	NA	NA	NA	NA	NA	NA	NA	11.0061	NA	NA	NA	NA	NA	NA	NA	sp|Q92616|GCN1_HUMAN
sp|Q92734|TFG_HUMAN	11.4467	13.9916	11.6019	11.0052	10.6037	11.4147	13.9153	11.6857	11.6844	12.0953	11.5792	10.9966	11.7042	11.4641	11.131	12.1069	11.3873	10.7353	10.9762	11.4505	sp|Q92734|TFG_HUMAN
sp|Q92736|RYR2_HUMAN	14.4307	11.8769	12.8625	13.7817	13.175	12.7926	14.7101	15.4498	13.783	13.6146	13.3041	12.8278	13.9221	12.2896	13.5219	14.3684	13.2426	13.1542	12.3581	13.6041	sp|Q92736|RYR2_HUMAN
sp|Q92747|ARC1A_HUMAN	NA	NA	11.4654	12.1071	NA	NA	11.15	12.926	11.5596	11.851	12.0558	NA	11.3463	11.2788	NA	10.2904	11.2705	NA	10.5991	11.1056	sp|Q92747|ARC1A_HUMAN
sp|Q92764|KRT35_HUMAN	NA	15.1436	14.244	14.0412	14.3709	13.2885	NA	15.974	13.0159	NA	15.6049	NA	16.1874	15.3217	NA	15.4607	15.3583	17.212	16.4492	NA	sp|Q92764|KRT35_HUMAN
sp|Q92783|STAM1_HUMAN	NA	NA	NA	NA	NA	NA	NA	NA	NA	10.6605	10.9504	NA	NA	NA	NA	11.2594	NA	8.84194	NA	NA	sp|Q92783|STAM1_HUMAN
sp|Q92817|EVPL_HUMAN	11.6832	NA	NA	NA	NA	NA	NA	14.9334	13.7534	NA	NA	NA	NA	NA	NA	NA	NA	14.3944	NA	NA	sp|Q92817|EVPL_HUMAN
sp|Q92820|GGH_HUMAN	20.9099	20.6105	20.927	20.6088	20.2422	20.7739	20.4307	21.116	20.9556	21.1377	21.0356	20.7233	20.9275	21.252	20.8408	20.8215	20.7044	19.8384	20.8106	20.2362	sp|Q92820|GGH_HUMAN
sp|Q92824|PCSK5_HUMAN	NA	NA	NA	NA	NA	NA	NA	9.2347	NA	NA	NA	NA	NA	10.1259	10.0342	11.1036	NA	NA	10.284	NA	sp|Q92824|PCSK5_HUMAN
sp|Q92874|DNSL2_HUMAN	12.3945	11.7957	12.3627	12.3503	13.1073	14.0088	11.2875	15.4968	14.9759	15.5884	13.5014	12.5768	13.5884	13.8188	12.9138	13.8153	13.918	15.378	13.9219	12.3042	sp|Q92874|DNSL2_HUMAN
sp|Q92876|KLK6_HUMAN	NA	NA	NA	NA	NA	NA	NA	13.2622	10.8615	NA	NA	NA	NA	NA	NA	11.2042	10.576	11.733	12.0728	NA	sp|Q92876|KLK6_HUMAN
sp|Q92890|UFD1_HUMAN	12.0155	NA	11.7349	11.4833	13.153	13.4939	NA	14.4953	14.499	12.267	14.6944	NA	11.7137	12.529	14.7843	14.1847	11.542	13.8425	12.9211	12.1633	sp|Q92890|UFD1_HUMAN
sp|Q92896|GSLG1_HUMAN	13.0589	9.21125	NA	11.5455	9.52688	NA	9.68657	NA	12.5044	11.5467	11.8115	10.7138	12.0228	10.9979	10.8339	9.76393	12.7589	8.58126	NA	NA	sp|Q92896|GSLG1_HUMAN
sp|Q92900|RENT1_HUMAN	NA	NA	12.5906	9.98832	11.6029	13.0864	NA	NA	11.3103	NA	NA	NA	NA	10.6132	13.7281	12.4808	NA	NA	NA	10.9544	sp|Q92900|RENT1_HUMAN
sp|Q93009|UBP7_HUMAN	14.7956	14.005	15.5834	16.7565	16.169	16.7276	13.8156	16.698	17.9652	16.0623	16.2135	15.166	16.4235	17.0993	17.4588	17.1997	16.4248	16.5692	17.7984	18.4104	sp|Q93009|UBP7_HUMAN
sp|Q93050|VPP1_HUMAN	13.3678	12.4562	15.4606	14.7509	13.9703	15.2811	12.8175	14.2756	15.0086	12.8445	13.8654	14.4753	14.457	14.7698	16.0379	15.123	14.2711	14.2932	14.2248	15.0736	sp|Q93050|VPP1_HUMAN
sp|Q93063|EXT2_HUMAN	17.8701	17.4209	17.5344	18.3332	17.7465	17.8685	17.9662	17.4021	17.785	17.3103	18.1338	18.0934	17.5211	17.7093	17.696	16.8776	18.0302	18.2071	17.4349	17.0897	sp|Q93063|EXT2_HUMAN
sp|Q969G5|CAVN3_HUMAN	NA	12.4924	NA	10.9533	NA	NA	NA	NA	12.6453	11.3911	NA	NA	NA	11.5099	11.931	12.0905	NA	11.8977	NA	13.1571	sp|Q969G5|CAVN3_HUMAN
sp|Q969H8|MYDGF_HUMAN	13.003	12.4979	14.272	13.9514	13.4715	14.6791	13.7083	13.3964	15.0468	13.8073	13.6642	13.1315	13.5016	13.7146	13.8623	13.6186	12.5042	12.7822	13.3112	14.0246	sp|Q969H8|MYDGF_HUMAN
sp|Q969T9|WBP2_HUMAN	NA	15.2657	15.8647	14.8778	16.2229	16.7226	15.4298	NA	15.1441	15.3227	14.8028	14.3075	15.318	14.9666	15.3005	NA	NA	NA	NA	NA	sp|Q969T9|WBP2_HUMAN
sp|Q969V3|NCLN_HUMAN	NA	NA	11.3818	12.3308	NA	11.9319	10.7992	12.2896	12.1018	11.565	11.6119	11.1186	11.8853	12.6372	11.7403	11.2724	11.0007	12.9732	11.2315	11.933	sp|Q969V3|NCLN_HUMAN
sp|Q96AG4|LRC59_HUMAN	NA	NA	NA	15.3687	NA	NA	NA	12.4368	NA	NA	NA	15.3697	NA	NA	NA	NA	NA	NA	NA	NA	sp|Q96AG4|LRC59_HUMAN
sp|Q96AQ6|PBIP1_HUMAN	NA	NA	NA	NA	NA	NA	NA	NA	9.87871	NA	NA	NA	NA	NA	NA	9.93623	NA	NA	NA	NA	sp|Q96AQ6|PBIP1_HUMAN
sp|Q96C23|GALM_HUMAN	NA	NA	NA	NA	NA	NA	11.8659	NA	13.1666	12.9132	12.0495	NA	NA	NA	12.3456	13.8384	11.5711	NA	NA	NA	sp|Q96C23|GALM_HUMAN
sp|Q96CD2|COAC_HUMAN	15.0778	14.7474	15.0908	15.1252	15.2203	15.4157	15.8527	15.2125	15.6019	15.4938	15.4742	15.4915	14.5506	15.1352	15.7863	15.47	15.2071	14.556	15.0951	14.977	sp|Q96CD2|COAC_HUMAN
sp|Q96CW1|AP2M1_HUMAN	NA	NA	11.792	12.2781	NA	11.9267	11.1237	NA	11.1664	NA	11.8309	NA	NA	12.012	12.6406	12.4346	NA	NA	NA	12.5423	sp|Q96CW1|AP2M1_HUMAN
sp|Q96CX2|KCD12_HUMAN	13.0122	NA	14.9313	NA	11.9699	12.9647	15.7857	13.0649	12.3221	13.5736	12.2893	14.0432	13.2902	13.8443	14.2263	13.801	14.1848	13.0955	14.7503	13.4563	sp|Q96CX2|KCD12_HUMAN
sp|Q96DA0|ZG16B_HUMAN	14.9611	NA	13.65	14.02	14.1452	NA	13.9251	12.9841	13.0622	14.3502	NA	NA	13.7488	NA	13.8008	14.862	14.502	12.8828	13.1677	14.1125	sp|Q96DA0|ZG16B_HUMAN
sp|Q96DE0|NUD16_HUMAN	14.8458	15.1661	14.5412	14.8837	14.7701	15.2295	14.6626	15.0139	14.8069	14.8791	14.5664	14.3794	14.7537	14.3672	15.0362	15.4786	14.4164	14.8941	14.8667	14.8335	sp|Q96DE0|NUD16_HUMAN
sp|Q96DR5|BPIA2_HUMAN	10.8036	NA	NA	13.0272	9.65487	NA	11.3823	NA	11.345	11.9662	11.2129	NA	NA	NA	NA	7.05877	NA	NA	NA	11.0781	sp|Q96DR5|BPIA2_HUMAN
sp|Q96DR8|MUCL1_HUMAN	21.4864	17.3938	18.9136	22.8135	NA	19.7609	22.5352	16.2883	16.8435	18.0169	19.2532	16.4715	18.4121	15.8716	15.1951	17.9358	NA	16.8178	18.8754	17.1509	sp|Q96DR8|MUCL1_HUMAN
sp|Q96DZ1|ERLEC_HUMAN	NA	10.7446	11.8356	10.75	11.6106	10.8743	12.116	NA	12.4936	NA	11.9834	10.578	11.3738	12.224	11.3396	12.408	11.1062	NA	11.2007	12.1573	sp|Q96DZ1|ERLEC_HUMAN
sp|Q96EE3|SEH1_HUMAN	NA	11.3939	11.5548	NA	11.7446	11.1529	10.7513	11.8414	11.1809	NA	13.4741	10.5916	11.4042	10.9023	NA	10.7658	11.1965	10.8881	10.8029	11.0991	sp|Q96EE3|SEH1_HUMAN
sp|Q96EK6|GNA1_HUMAN	NA	NA	NA	NA	9.52769	10.9509	NA	11.3653	10.16	NA	11.9256	NA	11.0995	9.68637	10.4768	9.06597	10.4041	9.52161	9.83502	9.02598	sp|Q96EK6|GNA1_HUMAN
sp|Q96FN9|DTD2_HUMAN	10.9123	10.9368	11.7936	11.174	11.7347	12.5187	10.872	11.73	12.2837	11.7308	11.4238	11.7111	11.729	11.8691	11.9415	11.4413	11.8691	11.5053	12.416	12.0533	sp|Q96FN9|DTD2_HUMAN
sp|Q96FQ6|S10AG_HUMAN	15.6031	14.7665	15.357	15.1454	14.9366	16.0676	15.412	15.86	15.8727	15.8798	15.3209	14.8417	15.6556	15.3758	15.5856	15.4656	15.7054	15.2104	15.4028	15.5943	sp|Q96FQ6|S10AG_HUMAN
sp|Q96FW1|OTUB1_HUMAN	NA	NA	NA	NA	NA	NA	NA	13.5648	11.3412	NA	NA	NA	NA	NA	NA	NA	NA	12.2069	NA	NA	sp|Q96FW1|OTUB1_HUMAN
sp|Q96G03|PGM2_HUMAN	11.6022	NA	11.9139	NA	11.7144	10.5603	10.4039	12.2364	15.4754	10.2895	NA	NA	9.8335	NA	14.1499	11.922	NA	14.2517	NA	NA	sp|Q96G03|PGM2_HUMAN
sp|Q96GC9|VMP1_HUMAN	NA	10.3531	NA	NA	10.7824	11.9306	NA	11.8691	12.0509	NA	NA	11.6083	NA	11.5811	12.3664	10.0451	11.06	NA	12.1598	10.976	sp|Q96GC9|VMP1_HUMAN
sp|Q96GX9|MTNB_HUMAN	12.5118	11.8389	13.0485	12.8077	12.5191	12.8196	12.6508	13.2665	13.9331	13.8126	12.6176	11.9623	13.046	12.9471	12.8673	13.611	12.9461	12.5934	12.8328	14.1466	sp|Q96GX9|MTNB_HUMAN
sp|Q96HC4|PDLI5_HUMAN	NA	NA	NA	14.709	NA	NA	NA	NA	14.5823	NA	NA	NA	NA	NA	NA	13.2357	NA	13.7776	15.6076	14.9318	sp|Q96HC4|PDLI5_HUMAN
sp|Q96HH9|GRM2B_HUMAN	14.484	13.6591	13.1262	13.6871	13.2333	13.2678	13.7513	13.2195	13.6324	16.9858	13.8452	13.6301	13.3303	13.0002	13.1439	13.0613	12.663	13.2897	13.5672	13.3156	sp|Q96HH9|GRM2B_HUMAN
sp|Q96HR9|REEP6_HUMAN	NA	10.0629	10.3506	NA	NA	11.6835	10.8583	10.2039	11.6634	NA	13.0891	NA	NA	NA	11.9911	NA	8.8593	NA	NA	10.389	sp|Q96HR9|REEP6_HUMAN
sp|Q96IU4|ABHEB_HUMAN	14.5333	14.5589	14.9511	14.3659	14.1538	14.8503	14.561	14.8857	13.9833	14.7655	13.6896	14.2414	14.548	14.3098	14.3726	14.3272	14.341	13.2656	14.7187	14.1598	sp|Q96IU4|ABHEB_HUMAN
sp|Q96IV0|NGLY1_HUMAN	NA	NA	12.7511	11.4412	NA	10.9433	NA	NA	11.0988	NA	NA	NA	10.6496	10.9719	11.5885	11.2392	12.1002	NA	11.1828	NA	sp|Q96IV0|NGLY1_HUMAN
sp|Q96JY6|PDLI2_HUMAN	NA	NA	NA	NA	NA	NA	NA	11.2563	7.29039	NA	NA	NA	NA	NA	NA	NA	NA	NA	NA	NA	sp|Q96JY6|PDLI2_HUMAN
sp|Q96K17|BT3L4_HUMAN	11.1395	11.6412	11.094	11.4444	10.9834	NA	NA	13.7418	12.2125	12.7005	13.5813	10.6411	11.3785	11.6335	12.7639	11.4246	12.4269	13.5072	12.4693	12.2474	sp|Q96K17|BT3L4_HUMAN
sp|Q96KC8|DNJC1_HUMAN	11.2758	NA	NA	11.0993	NA	11.2625	11.1972	11.4593	11.1745	NA	11.0042	11.0414	10.9216	11.3163	10.8957	11.3719	NA	NA	11.3121	NA	sp|Q96KC8|DNJC1_HUMAN
sp|Q96KP4|CNDP2_HUMAN	NA	NA	12.4032	NA	NA	NA	NA	12.612	11.6497	NA	NA	NA	NA	NA	11.7096	NA	NA	NA	NA	11.5042	sp|Q96KP4|CNDP2_HUMAN
sp|Q96L46|CPNS2_HUMAN	17.5802	16.942	19.1724	18.5576	18.5057	19.125	18.0116	19.0496	19.2899	19.1308	17.4821	18.4163	18.204	18.7108	18.8601	19.1551	18.5547	18.053	18.702	18.7144	sp|Q96L46|CPNS2_HUMAN
sp|Q96M27|PRRC1_HUMAN	NA	NA	NA	12.4162	NA	NA	NA	10.4464	12.551	10.3428	12.4502	NA	10.5238	10.8575	12.986	10.8754	NA	10.9145	11.0576	11.4372	sp|Q96M27|PRRC1_HUMAN
sp|Q96P63|SPB12_HUMAN	23.1688	23.0813	22.9912	22.978	22.7371	23.3604	22.9057	22.6745	22.8736	22.9361	23.0052	23.1582	23.2634	23.3893	23.6099	23.5756	23.0578	22.5635	23.4513	23.5208	sp|Q96P63|SPB12_HUMAN
sp|Q96PE7|MCEE_HUMAN	NA	NA	NA	NA	NA	NA	NA	NA	13.0306	NA	NA	NA	NA	NA	NA	NA	NA	NA	11.2881	NA	sp|Q96PE7|MCEE_HUMAN
sp|Q96QA5|GSDMA_HUMAN	22.0606	22.0839	22.0415	21.9674	21.2343	21.5668	21.3599	22.3512	22.271	21.2027	21.3688	22.2191	21.5462	21.8551	21.9032	21.2414	21.7391	22.1403	22.2555	21.3411	sp|Q96QA5|GSDMA_HUMAN
sp|Q96QK1|VPS35_HUMAN	12.8846	10.1211	11.0344	10.9164	10.9876	10.4962	12.4994	12.8052	11.9161	12.6533	11.044	10.897	11.7156	11.5336	10.8899	NA	10.8265	11.0346	10.7927	NA	sp|Q96QK1|VPS35_HUMAN
sp|Q96QR8|PURB_HUMAN	13.9135	12.6769	13.4066	13.2445	12.9752	13.6985	12.7448	14.1652	14.1166	12.9869	13.7121	12.6854	13.7093	13.2787	13.6591	14.3363	13.3827	14.0156	13.9056	14.507	sp|Q96QR8|PURB_HUMAN
sp|Q96S55|WRIP1_HUMAN	12.1518	12.6414	NA	12.4212	11.7354	12.3495	12.8601	12.3978	12.7112	NA	12.2914	12.0211	12.5001	12.0841	12.5494	12.2042	12.5014	11.211	12.4495	12.7046	sp|Q96S55|WRIP1_HUMAN
sp|Q96SI1|KCD15_HUMAN	NA	NA	NA	11.1919	NA	11.4026	NA	NA	11.9346	NA	NA	NA	NA	11.1837	11.3345	11.5251	NA	12.6439	NA	NA	sp|Q96SI1|KCD15_HUMAN
sp|Q96TA1|NIBL1_HUMAN	12.8683	12.1991	12.9535	11.8294	12.5155	13.0474	12.7677	13.5468	13.1815	11.7563	12.875	12.2975	13.2342	13.0519	12.7755	13.0614	12.2109	11.7209	11.5527	12.0972	sp|Q96TA1|NIBL1_HUMAN
sp|Q99436|PSB7_HUMAN	14.9907	15.7896	16.7583	16.6007	16.2169	17.1255	16.208	17.0724	17.3749	16.4331	17.1503	17.4061	17.172	17.5397	17.2901	17.1778	17.0343	16.5999	17.3189	16.6643	sp|Q99436|PSB7_HUMAN
sp|Q99456|K1C12_HUMAN	17.0537	20.5377	19.2329	19.4988	18.8231	17.1585	20.458	19.518	19.9839	20.4982	18.0272	19.2599	20.3014	19.8114	19.4795	20.3852	20.6951	22.5166	20.8448	20.4423	sp|Q99456|K1C12_HUMAN
sp|Q99497|PARK7_HUMAN	17.9295	16.7449	18.9192	19.1633	19.0702	19.2765	19.1017	19.0523	19.5327	19.7247	19.7131	19.2231	19.6563	19.6074	19.1244	19.465	19.0775	18.5801	19.1725	19.4106	sp|Q99497|PARK7_HUMAN
sp|Q99519|NEUR1_HUMAN	11.1101	11.9369	NA	NA	NA	NA	NA	NA	NA	NA	NA	11.7289	NA	12.2949	NA	11.8033	11.4095	11.6214	NA	12.1757	sp|Q99519|NEUR1_HUMAN
sp|Q99523|SORT_HUMAN	NA	NA	NA	NA	NA	10.0213	NA	11.4804	NA	NA	NA	NA	10.5392	NA	NA	10.1315	NA	NA	NA	9.85448	sp|Q99523|SORT_HUMAN
sp|Q99536|VAT1_HUMAN	16.1194	15.6549	16.1565	15.4458	15.3945	15.9402	15.604	16.0331	16.5911	15.473	16.0881	17.2712	17.2835	15.9564	17.2964	17.1392	16.1729	15.7906	16.1253	17.1188	sp|Q99536|VAT1_HUMAN
sp|Q99584|S10AD_HUMAN	NA	NA	NA	NA	NA	11.379	12.0194	NA	NA	12.1554	11.8218	NA	11.3762	13.53	NA	11.3268	NA	NA	NA	NA	sp|Q99584|S10AD_HUMAN
sp|Q99611|SPS2_HUMAN	NA	NA	NA	9.34227	NA	NA	NA	NA	9.85946	NA	NA	NA	NA	NA	NA	NA	NA	NA	NA	NA	sp|Q99611|SPS2_HUMAN
sp|Q99653|CHP1_HUMAN	NA	NA	12.2799	12.9244	13.2436	13.3333	11.4849	13.8	13.7261	13.662	11.5296	13.0489	13.083	13.7547	13.5864	13.67	12.2097	13.1892	13.2384	13.9279	sp|Q99653|CHP1_HUMAN
sp|Q99714|HCD2_HUMAN	NA	NA	NA	NA	NA	NA	NA	13.4132	11.5495	NA	NA	NA	NA	NA	NA	NA	NA	NA	NA	NA	sp|Q99714|HCD2_HUMAN
sp|Q99720|SGMR1_HUMAN	13.1949	12.9895	12.0807	12.7285	12.0848	12.6391	12.8354	12.2849	12.9919	10.8871	12.2823	12.7176	12.826	12.8663	12.901	12.5478	12.9643	12.4967	13.0325	12.3047	sp|Q99720|SGMR1_HUMAN
sp|Q99735|MGST2_HUMAN	16.2765	16.4104	15.7219	15.9036	15.4588	15.8371	15.5067	16.725	17.1265	12.4293	16.0372	15.7373	15.4255	16.391	16.1143	16.0649	16.2788	16.5144	16.2296	16.0377	sp|Q99735|MGST2_HUMAN
sp|Q99798|ACON_HUMAN	NA	NA	NA	NA	NA	NA	NA	11.5946	10.8222	NA	NA	NA	NA	NA	NA	NA	NA	NA	NA	NA	sp|Q99798|ACON_HUMAN
sp|Q99805|TM9S2_HUMAN	12.8168	9.63929	10.1949	12.4094	10.6342	11.6949	12.3022	11.4824	11.3826	10.6677	12.3457	11.7638	11.9612	12.3933	12.4466	12.7644	11.7756	11.2691	12.1213	10.5955	sp|Q99805|TM9S2_HUMAN
sp|Q99816|TS101_HUMAN	NA	NA	NA	NA	9.04403	10.6041	NA	NA	11.2459	NA	NA	10.7498	NA	NA	10.2954	NA	NA	NA	NA	11.1387	sp|Q99816|TS101_HUMAN
sp|Q99829|CPNE1_HUMAN	14.06	13.2033	14.8452	14.2863	14.2151	14.6282	13.1137	15.0706	16.808	15.1727	14.3342	13.6096	15.0819	14.4738	15.4224	15.3345	13.8752	14.475	13.8059	14.781	sp|Q99829|CPNE1_HUMAN
sp|Q9BQ50|TREX2_HUMAN	14.634	13.7505	16.1422	15.5778	15.606	15.182	15.314	15.0267	16.4286	14.2602	15.0863	14.5805	14.9109	15.029	16.0315	15.2156	12.4175	14.8275	14.4044	14.9932	sp|Q9BQ50|TREX2_HUMAN
sp|Q9BQA1|MEP50_HUMAN	15.9739	15.3067	17.1815	16.9356	16.3281	17.0643	16.9552	15.7258	17.2904	16.1278	15.6438	16.4203	16.1057	16.1959	17.7515	16.9855	15.5961	15.9339	16.237	16.5952	sp|Q9BQA1|MEP50_HUMAN
sp|Q9BQE3|TBA1C_HUMAN	17.2325	16.2798	16.2674	16.0146	16.451	16.5837	16.3738	19.3004	17.8156	16.6433	15.7967	15.3231	15.9303	15.737	15.6938	16.7867	16.4161	17.6522	16.7285	16.6078	sp|Q9BQE3|TBA1C_HUMAN
sp|Q9BQS8|FYCO1_HUMAN	13.2197	NA	NA	NA	NA	NA	NA	10.5823	12.0138	13.0614	13.9581	NA	NA	NA	13.0339	NA	13.4888	NA	NA	NA	sp|Q9BQS8|FYCO1_HUMAN
sp|Q9BRF8|CPPED_HUMAN	NA	NA	12.6019	9.94672	11.7786	11.7738	9.96542	13.2871	13.3916	12.0319	NA	NA	11.7874	10.6242	11.3792	12.091	9.77905	11.1613	9.98095	11.7204	sp|Q9BRF8|CPPED_HUMAN
sp|Q9BS26|ERP44_HUMAN	12.7209	10.0801	10.5387	10.6391	10.7235	11.5443	11.9448	13.9302	13.8186	12.169	14.4178	12.317	13.5463	12.7991	11.9339	12.251	11.9434	13.5841	12.6699	12.7672	sp|Q9BS26|ERP44_HUMAN
sp|Q9BS40|LXN_HUMAN	15.0264	15.292	15.0589	15.3523	15.257	15.4589	15.1821	15.4888	15.5314	15.6624	15.4045	15.3089	15.5584	15.5953	15.2849	15.3466	15.3835	14.5848	15.3258	15.528	sp|Q9BS40|LXN_HUMAN
sp|Q9BSA9|TM175_HUMAN	NA	NA	NA	11.7122	NA	NA	NA	10.0967	11.1506	NA	NA	11.6894	10.226	10.4842	11.8707	10.2845	10.4566	11.3009	11.7727	10.9658	sp|Q9BSA9|TM175_HUMAN
sp|Q9BSB4|ATGA1_HUMAN	NA	NA	NA	12.1587	NA	NA	NA	13.8399	14.3775	14.0404	NA	13.684	13.1827	13.1909	13.2542	NA	12.6816	13.6117	13.564	13.8309	sp|Q9BSB4|ATGA1_HUMAN
sp|Q9BSJ8|ESYT1_HUMAN	NA	NA	9.96713	NA	10.1748	12.6593	NA	11.8025	14.5914	14.5974	10.0313	NA	12.0051	11.4544	11.425	12.9158	12.831	12.75	9.9523	10.9231	sp|Q9BSJ8|ESYT1_HUMAN
sp|Q9BTV4|TMM43_HUMAN	15.1712	15.2632	15.2647	16.1	15.2693	15.2612	15.669	16.3961	16.7173	13.9007	15.8227	15.7056	15.2819	16.4456	15.353	16.4281	16.4616	15.8398	15.9883	16.1776	sp|Q9BTV4|TMM43_HUMAN
sp|Q9BTY2|FUCO2_HUMAN	12.508	NA	NA	NA	NA	NA	NA	NA	NA	13.111	12.939	NA	NA	12.4446	NA	NA	NA	NA	NA	NA	sp|Q9BTY2|FUCO2_HUMAN
sp|Q9BUF5|TBB6_HUMAN	10.3995	NA	12.7234	NA	NA	NA	NA	12.035	10.5125	NA	NA	NA	NA	NA	NA	NA	NA	12.7568	NA	NA	sp|Q9BUF5|TBB6_HUMAN
sp|Q9BUH6|PAXX_HUMAN	14.5883	13.9082	13.5131	13.9119	13.8273	14.6225	13.7974	14.5405	14.7911	14.8921	14.482	13.5678	13.8554	14.1086	14.909	15.1345	13.7025	15.1904	14.4383	14.8331	sp|Q9BUH6|PAXX_HUMAN
sp|Q9BUP3|HTAI2_HUMAN	13.0414	11.765	12.9587	12.12	11.865	12.409	13.4432	13.1726	12.7331	13.7044	12.6958	12.3884	12.6289	12.9815	12.189	12.9124	12.0426	11.0936	11.9725	12.652	sp|Q9BUP3|HTAI2_HUMAN
sp|Q9BVC6|TM109_HUMAN	14.3649	15.0108	15.0183	16.4327	15.2123	15.9623	15.3695	14.6019	16.4792	NA	15.295	15.6437	15.1165	15.7888	15.3616	14.8495	14.7944	14.8349	NA	15.1874	sp|Q9BVC6|TM109_HUMAN
sp|Q9BVK6|TMED9_HUMAN	14.0128	14.143	13.533	14.5221	13.8086	13.7314	14.7102	14.2991	14.7863	14.3348	15.2789	14.5791	14.6175	15.2965	14.5183	14.2932	14.0276	14.6879	14.1709	14.7515	sp|Q9BVK6|TMED9_HUMAN
sp|Q9BWD1|THIC_HUMAN	13.1085	13.5179	16.3846	15.8865	12.1357	15.0797	12.7776	13.3197	17.3495	13.9308	12.8812	13.097	14.1679	13.1687	17.1236	15.0667	13.3946	12.3629	13.9395	13.1955	sp|Q9BWD1|THIC_HUMAN
sp|Q9BWS9|CHID1_HUMAN	NA	10.683	NA	NA	NA	9.66263	NA	11.2574	NA	11.2886	10.2976	NA	10.1622	10.8721	10.6508	10.1628	9.945	NA	10.8083	10.5568	sp|Q9BWS9|CHID1_HUMAN
sp|Q9BXP2|S12A9_HUMAN	NA	NA	9.59152	11.8036	NA	NA	NA	10.7	10.9048	NA	NA	11.6779	NA	11.108	12.3034	11.6571	NA	11.1848	11.8254	11.1674	sp|Q9BXP2|S12A9_HUMAN
sp|Q9BY32|ITPA_HUMAN	NA	NA	NA	NA	NA	NA	NA	10.8129	10.5512	NA	NA	NA	NA	NA	NA	NA	NA	11.5602	NA	NA	sp|Q9BY32|ITPA_HUMAN
sp|Q9BYE2|TMPSD_HUMAN	13.2523	12.0686	12.1188	12.7493	11.8378	12.3961	13.4709	13.5531	12.76	12.3388	12.7881	9.52176	12.4306	12.1892	9.48613	12.2254	11.5943	12.1102	12.359	12.0479	sp|Q9BYE2|TMPSD_HUMAN
sp|Q9BYJ1|LOXE3_HUMAN	16.6946	16.793	17.5805	17.0835	16.8628	17.1917	17.3291	16.8732	17.8412	17.802	16.7228	17.1397	16.9122	16.8783	17.8014	17.1291	16.7724	16.0059	16.4274	16.8935	sp|Q9BYJ1|LOXE3_HUMAN
sp|Q9BYQ8|KRA49_HUMAN	NA	9.53175	NA	NA	8.79893	NA	NA	12.4239	NA	NA	NA	NA	9.64969	9.05044	NA	11.7136	11.8316	12.5607	11.7851	NA	sp|Q9BYQ8|KRA49_HUMAN
sp|Q9BYR6|KRA33_HUMAN	13.1738	15.6113	14.793	15.5964	16.3246	15.6104	13.4007	17.6928	15.7061	12.7378	16.9622	NA	16.5292	15.7811	NA	17.0816	16.5677	17.1056	16.5756	10.5764	sp|Q9BYR6|KRA33_HUMAN
sp|Q9BYR7|KRA32_HUMAN	NA	15.3737	14.9664	13.7683	14.1916	13.5149	12.7462	17.6927	13.483	NA	15.7468	NA	16.4846	16.1511	12.8027	17.2524	16.63	17.6401	17.5015	12.2105	sp|Q9BYR7|KRA32_HUMAN
sp|Q9BYR8|KRA31_HUMAN	13.5379	15.7416	15.0913	15.4822	15.6498	14.5813	13.1713	17.8834	14.5466	NA	16.7855	12.6386	16.4263	16.5829	13.4654	16.9436	16.8286	18.3524	17.6771	12.9398	sp|Q9BYR8|KRA31_HUMAN
sp|Q9C040|TRIM2_HUMAN	NA	8.73572	10.3396	NA	9.39113	10.7757	NA	9.88112	NA	9.32928	NA	NA	9.09104	NA	11.2155	NA	8.94194	NA	9.3323	NA	sp|Q9C040|TRIM2_HUMAN
sp|Q9C075|K1C23_HUMAN	21.9188	21.5896	22.0324	21.608	21.5858	21.9313	21.8695	21.6098	21.7787	21.4061	21.6868	21.8302	21.6656	21.6316	21.8945	21.8805	21.6494	21.4709	21.6393	21.9452	sp|Q9C075|K1C23_HUMAN
sp|Q9GZM5|YIPF3_HUMAN	NA	12.9761	NA	NA	NA	13.357	NA	13.4706	13.9085	NA	NA	NA	NA	13.7114	14.1557	NA	13.3229	NA	13.5534	NA	sp|Q9GZM5|YIPF3_HUMAN
sp|Q9GZP4|PITH1_HUMAN	14.077	12.3426	16.2097	15.6283	15.2914	15.479	13.7688	16.954	18.1437	17.4912	15.8707	15.3642	16.2786	16.6446	17.8901	17.582	15.9859	16.2832	16.4255	17.576	sp|Q9GZP4|PITH1_HUMAN
sp|Q9GZT8|NIF3L_HUMAN	14.0158	13.5706	15.245	14.9189	15.1166	14.7364	14.5715	14.6923	16.0913	15.222	15.3378	15.4802	15.4236	15.9544	15.6101	15.419	15.0464	15.1785	14.1395	15.3406	sp|Q9GZT8|NIF3L_HUMAN
sp|Q9GZZ8|LACRT_HUMAN	14.5654	13.3048	NA	15.2054	13.2693	NA	13.5032	NA	14.463	14.4048	NA	NA	12.362	11.5625	14.4004	16.1941	13.2104	16.0983	13.4726	14.9555	sp|Q9GZZ8|LACRT_HUMAN
sp|Q9H008|LHPP_HUMAN	13.1076	13.6614	14.7661	13.8102	15.0837	14.4246	13.919	14.7951	15.3854	15.3204	14.6931	14.3869	14.1171	14.4572	14.9078	14.1576	13.1749	13.5772	13.2616	13.1972	sp|Q9H008|LHPP_HUMAN
sp|Q9H0B8|CRLD2_HUMAN	11.1795	12.3044	11.4989	11.8238	10.6636	11.9556	11.9898	12.0239	11.3658	10.9496	10.1711	10.7578	12.1233	11.6161	10.5025	12.9114	12.4963	NA	11.8826	11.1352	sp|Q9H0B8|CRLD2_HUMAN
sp|Q9H0E2|TOLIP_HUMAN	17.1448	16.5198	16.1104	16.7125	16.4753	16.6223	15.665	17.5247	17.5353	17.3703	17.4978	16.1833	16.9073	17.1653	16.7815	17.1391	17.2728	17.6436	17.3177	16.1523	sp|Q9H0E2|TOLIP_HUMAN
sp|Q9H0E7|UBP44_HUMAN	NA	NA	NA	13.4688	13.1894	NA	NA	12.0234	14.8862	11.7644	NA	NA	NA	NA	12.4277	13.0808	NA	14.3783	NA	15.1385	sp|Q9H0E7|UBP44_HUMAN
sp|Q9H0P0|5NT3A_HUMAN	NA	NA	NA	NA	NA	NA	NA	12.2152	9.43833	10.4106	NA	NA	NA	NA	NA	NA	NA	NA	NA	NA	sp|Q9H0P0|5NT3A_HUMAN
sp|Q9H0R3|TM222_HUMAN	NA	11.5855	NA	NA	NA	11.6435	NA	10.1092	NA	NA	NA	NA	NA	NA	NA	NA	11.7574	12.3337	NA	10.1057	sp|Q9H0R3|TM222_HUMAN
sp|Q9H0R4|HDHD2_HUMAN	NA	NA	11.7917	9.82234	NA	9.96916	NA	12.7271	14.5483	13.0489	NA	NA	NA	NA	13.9826	11.8814	NA	10.6258	NA	10.7963	sp|Q9H0R4|HDHD2_HUMAN
sp|Q9H0U3|MAGT1_HUMAN	14.9569	11.6731	NA	12.3121	NA	NA	NA	13.0491	NA	NA	NA	11.4001	NA	11.3614	NA	11.5032	NA	NA	11.2024	NA	sp|Q9H0U3|MAGT1_HUMAN
sp|Q9H0U4|RAB1B_HUMAN	15.2276	14.5509	15.3331	14.9565	14.3938	14.9671	15.3783	16.2441	15.6463	15.4094	14.1762	14.1944	14.8644	15.0371	14.58	15.2907	14.5403	14.3474	14.1724	15.8725	sp|Q9H0U4|RAB1B_HUMAN
sp|Q9H0V9|LMA2L_HUMAN	11.0412	10.9926	NA	12.4758	NA	11.7265	NA	11.2553	12.2312	NA	NA	NA	12.0083	12.3306	NA	11.8129	11.9506	11.0005	12.1445	NA	sp|Q9H0V9|LMA2L_HUMAN
sp|Q9H0W9|CK054_HUMAN	17.9468	16.9325	16.6413	17.2182	17.7543	18.1672	17.9365	18.5263	18.6559	18.2744	18.3119	16.9006	18.2303	18.1156	16.3323	17.9151	18.3233	18.0476	18.1337	17.3851	sp|Q9H0W9|CK054_HUMAN
sp|Q9H173|SIL1_HUMAN	11.3192	10.8473	10.856	11.68	10.9709	10.7166	11.4693	12.1705	10.8166	11.9548	11.6343	9.80679	10.9245	11.7877	10.8035	10.7332	9.29721	10.5086	NA	11.1783	sp|Q9H173|SIL1_HUMAN
sp|Q9H190|SDCB2_HUMAN	11.8897	13.0807	NA	10.859	10.5578	11.9545	11.2423	12.2937	12.4283	12.7252	11.2861	NA	11.1454	11.06	10.4765	11.3092	10.8405	11.7409	10.8233	NA	sp|Q9H190|SDCB2_HUMAN
sp|Q9H1E1|RNAS7_HUMAN	16.5734	17.4583	16.6625	16.7376	17.2861	17.5726	16.4424	18.4302	17.1019	16.3258	16.8332	16.4755	16.9811	16.8331	18.0672	17.5011	17.6604	17.7824	16.2529	17.751	sp|Q9H1E1|RNAS7_HUMAN
sp|Q9H1E3|NUCKS_HUMAN	12.9696	13.9246	12.0473	12.9779	13.4064	11.9577	13.8341	NA	12.3727	NA	13.8637	12.8758	13.5308	13.6183	13.07	12.6598	13.3382	12.0322	14.5154	14.2489	sp|Q9H1E3|NUCKS_HUMAN
sp|Q9H1J1|REN3A_HUMAN	16.1432	15.29	14.9056	14.797	15.6396	14.8341	15.5812	11.0406	14.6445	16.4474	15.0062	15.5342	15.6431	9.86097	12.2521	13.5156	15.8678	18.558	12.7162	17.4155	sp|Q9H1J1|REN3A_HUMAN
sp|Q9H223|EHD4_HUMAN	12.2013	12.992	12.6385	13.3735	12.9462	12.6678	12.9553	12.0778	13.3895	12.6362	13.9523	13.0067	13.943	14.1388	12.9269	13.1778	12.4008	12.1666	12.0532	11.5787	sp|Q9H223|EHD4_HUMAN
sp|Q9H299|SH3L3_HUMAN	12.506	11.4681	11.0569	NA	11.2151	NA	12.3591	15.3253	12.8407	11.8513	11.4491	NA	11.2768	NA	11.6287	12.7039	12.8037	13.1483	12.0379	12.4892	sp|Q9H299|SH3L3_HUMAN
sp|Q9H2C0|GAN_HUMAN	13.1609	12.7022	13.5285	12.7101	12.6082	12.464	13.4568	14.6393	13.8872	13.441	13.1186	12.7776	13.0989	13.2842	12.8028	13.284	13.0052	12.1345	12.2455	13.7711	sp|Q9H2C0|GAN_HUMAN
sp|Q9H2U2|IPYR2_HUMAN	13.0135	12.6204	13.8185	13.3904	13.3254	12.8922	13.5598	12.5161	13.6077	NA	13.4388	12.8151	12.7542	13.5772	14.2846	14.6267	13.2186	11.9869	12.6436	14.1729	sp|Q9H2U2|IPYR2_HUMAN
sp|Q9H330|TM245_HUMAN	11.2793	12.3073	11.6265	12.4735	11.5005	12.3097	12.0146	12.2078	12.9944	NA	11.8132	12.5984	11.797	12.6491	11.8485	12.0012	12.1096	NA	11.9608	12.2354	sp|Q9H330|TM245_HUMAN
sp|Q9H3G5|CPVL_HUMAN	14.7748	15.0015	15.0193	13.7917	13.8605	14.2449	14.4833	14.567	14.6644	15.295	14.6886	NA	14.8739	14.3925	14.062	13.492	14.6338	14.1234	13.0672	13.7948	sp|Q9H3G5|CPVL_HUMAN
sp|Q9H3N1|TMX1_HUMAN	NA	NA	NA	13.5346	NA	12.2597	NA	NA	12.5281	NA	NA	11.9806	NA	11.3877	NA	11.3088	NA	NA	NA	NA	sp|Q9H3N1|TMX1_HUMAN
sp|Q9H3Z4|DNJC5_HUMAN	NA	NA	8.40773	9.15115	NA	9.44869	NA	9.8326	10.361	NA	9.74451	9.54001	NA	NA	NA	9.27253	NA	NA	NA	9.25376	sp|Q9H3Z4|DNJC5_HUMAN
sp|Q9H4M9|EHD1_HUMAN	13.4788	12.9337	13.6238	13.5279	13.5667	12.9214	13.3022	13.6174	14.2298	12.2199	14.1697	13.0311	13.9027	14.3416	13.2206	13.1518	12.8097	12.4665	12.5842	12.8756	sp|Q9H4M9|EHD1_HUMAN
sp|Q9H6U8|ALG9_HUMAN	NA	NA	11.2322	12.5005	11.6731	11.9574	11.1916	11.684	12.3935	NA	NA	11.9922	NA	13.069	12.2547	11.2742	NA	10.4285	12.2962	11.4731	sp|Q9H6U8|ALG9_HUMAN
sp|Q9H6Y7|RN167_HUMAN	14.855	14.614	14.494	14.8498	13.854	14.4066	14.6345	14.9088	15.267	15.1391	15.2126	14.2259	14.5688	14.6171	14.3983	14.3746	14.3259	14.6382	14.3559	14.5581	sp|Q9H6Y7|RN167_HUMAN
sp|Q9H720|PG2IP_HUMAN	10.625	12.7512	11.3557	12.6028	12.6325	13.3992	10.8705	12.3192	13.3462	10.517	12.8429	12.2639	12.8626	13.4299	11.6155	12.5375	12.7345	12.3635	13.225	11.397	sp|Q9H720|PG2IP_HUMAN
sp|Q9H7M6|ZSWM4_HUMAN	NA	NA	NA	NA	10.8678	NA	NA	10.904	NA	NA	11.1917	NA	NA	NA	10.795	11.384	10.9588	12.2542	12.6396	9.8266	sp|Q9H7M6|ZSWM4_HUMAN
sp|Q9H845|ACAD9_HUMAN	NA	NA	NA	NA	NA	13.3491	NA	12.4194	14.8148	13.551	NA	NA	NA	12.2704	NA	11.9552	NA	NA	NA	NA	sp|Q9H845|ACAD9_HUMAN
sp|Q9H8H3|MET7A_HUMAN	NA	10.5253	10.7454	10.8062	10.3867	10.5468	10.7462	10.1473	14.0617	NA	11.2264	10.8436	9.98529	11.0752	12.3583	NA	NA	10.3551	11.7652	NA	sp|Q9H8H3|MET7A_HUMAN
sp|Q9HAN9|NMNA1_HUMAN	12.9356	13.6987	14.3853	13.8838	13.9519	13.8209	13.6367	13.034	13.586	13.1096	13.6104	13.3132	13.7516	13.7435	13.6303	13.9237	13.9293	12.9885	13.9746	13.362	sp|Q9HAN9|NMNA1_HUMAN
sp|Q9HAT2|SIAE_HUMAN	16.1416	16.1877	16.6716	16.1962	16.3097	16.3814	15.8169	16.698	16.6962	16.7755	16.0529	16.1491	16.5059	16.4005	16.4978	16.184	16.5332	16.1001	16.3653	16.6917	sp|Q9HAT2|SIAE_HUMAN
sp|Q9HB07|MYG1_HUMAN	12.3941	NA	13.8859	13.5757	12.6926	13.7736	13.065	14.3294	16.0813	14.9928	11.2883	11.1149	12.002	11.7984	14.7833	13.9373	11	13.0944	11.4775	12.7439	sp|Q9HB07|MYG1_HUMAN
sp|Q9HB40|RISC_HUMAN	17.5015	17.3061	17.1433	17.1337	17.0462	17.5563	16.8987	18.7504	17.6851	18.2422	18.0653	17.1099	17.8208	18.0036	17.4631	17.9041	18.2295	17.6375	18.3735	18.0121	sp|Q9HB40|RISC_HUMAN
sp|Q9HC07|TM165_HUMAN	10.2374	9.67689	NA	11.7221	10.9152	NA	NA	11.4672	11.2907	NA	11.0949	11.6058	10.6916	12.4739	NA	11.2591	NA	11.7337	12.1989	11.5005	sp|Q9HC07|TM165_HUMAN
sp|Q9HC35|EMAL4_HUMAN	12.6841	11.3916	13.7344	14.3826	14.2943	14.0514	11.308	14.7335	14.9021	15.5367	15.9872	14.0756	15.5731	15.1606	15.48	15.4658	13.9572	14.8952	14.4883	16.0154	sp|Q9HC35|EMAL4_HUMAN
sp|Q9HC38|GLOD4_HUMAN	NA	10.4628	NA	NA	NA	NA	NA	12.3749	12.4169	NA	5.80943	NA	NA	NA	9.02114	NA	9.44088	NA	NA	10.4509	sp|Q9HC38|GLOD4_HUMAN
sp|Q9HC84|MUC5B_HUMAN	12.3443	NA	NA	12.157	NA	NA	NA	9.60557	NA	12.065	NA	NA	NA	NA	11.082	15.8047	12.0767	10.9898	11.3094	12.0122	sp|Q9HC84|MUC5B_HUMAN
sp|Q9HCC0|MCCB_HUMAN	NA	NA	NA	NA	NA	NA	NA	10.3783	11.1153	NA	NA	NA	NA	11.1684	10.839	11.4953	9.43236	NA	9.0837	11.1253	sp|Q9HCC0|MCCB_HUMAN
sp|Q9HCE6|ARGAL_HUMAN	12.6747	NA	12.2242	10.5933	11.2393	12.049	NA	11.8822	13.1834	NA	NA	NA	NA	NA	13.3116	12.8464	NA	NA	NA	10.7341	sp|Q9HCE6|ARGAL_HUMAN
sp|Q9HCE9|ANO8_HUMAN	11.114	12.2776	10.7524	13.2978	12.0687	13.082	11.5437	11.2245	12.815	11.559	11.4633	12.0693	11.4118	12.3046	13.4878	11.9351	12.137	11.5749	12.1431	12.2864	sp|Q9HCE9|ANO8_HUMAN
sp|Q9HCJ1|ANKH_HUMAN	NA	14.3733	NA	11.5473	NA	NA	NA	11.5144	11.1783	NA	NA	NA	NA	11.8071	12.1639	NA	NA	NA	NA	11.1154	sp|Q9HCJ1|ANKH_HUMAN
sp|Q9HCY8|S10AE_HUMAN	18.4256	17.4591	18.2799	18.0651	17.6466	17.9178	18.6165	18.3602	18.1784	18.4663	17.6525	17.5846	18.0278	17.7925	18.1496	18.1828	17.8969	18.2996	17.6747	17.4262	sp|Q9HCY8|S10AE_HUMAN
sp|Q9HD45|TM9S3_HUMAN	NA	9.25558	NA	NA	NA	NA	NA	NA	NA	NA	NA	11.5741	NA	NA	NA	NA	NA	NA	NA	NA	sp|Q9HD45|TM9S3_HUMAN
sp|Q9HDC9|APMAP_HUMAN	14.0769	13.2273	13.4901	13.4265	13.6817	14.6146	13.58	14.611	14.9181	13.5053	14.2198	14.4418	13.8657	14.3043	15.0004	14.2761	14.1332	14.3284	14.288	14.4262	sp|Q9HDC9|APMAP_HUMAN
sp|Q9NNX1|TUFT1_HUMAN	16.9689	16.9185	17.0055	16.5661	16.3469	16.3408	15.8753	16.3795	16.5849	16.0694	17.1941	16.5934	16.9593	17.0343	16.9234	17.0128	16.3244	15.7594	16.5234	17.4323	sp|Q9NNX1|TUFT1_HUMAN
sp|Q9NP55|BPIA1_HUMAN	15.2181	12.9531	12.9279	13.4565	15.0734	11.9424	14.6068	12.9086	12.1358	15.9549	12.4378	13.6953	14.534	12.3017	13.0378	16.8769	14.4771	13.9637	12.8917	14.231	sp|Q9NP55|BPIA1_HUMAN
sp|Q9NP72|RAB18_HUMAN	11.6832	10.3921	11.2072	11.3327	10.3129	11.4565	11.9646	14.0545	12.7013	10.1473	11.9009	10.4486	9.90189	10.1149	10.2324	11.543	10.5149	12.3228	10.0102	12.1913	sp|Q9NP72|RAB18_HUMAN
sp|Q9NP79|VTA1_HUMAN	14.3372	13.2911	12.8996	13.735	13.135	12.6151	12.1997	16.5139	14.6698	15.5726	15.6519	NA	14.026	14.0329	13.7883	14.3952	14.3114	16.1407	14.3805	14.5632	sp|Q9NP79|VTA1_HUMAN
sp|Q9NPA0|EMC7_HUMAN	9.5945	10.2457	12.5253	12.0451	10.7669	11.8008	11.8327	13.1902	14.8219	11.2589	12.5057	10.5538	12.5173	12.9532	12.732	10.8663	12.8042	10.5975	12.6089	12.6452	sp|Q9NPA0|EMC7_HUMAN
sp|Q9NPJ8|NXT2_HUMAN	13.5319	NA	13.9428	13.6291	12.6675	13.6118	12.2049	13.3189	14.2372	13.9813	13.3576	13.3318	13.569	13.6315	14.1189	14.0293	12.8815	13.0851	13.2142	13.7982	sp|Q9NPJ8|NXT2_HUMAN
sp|Q9NQ38|ISK5_HUMAN	14.3977	13.5637	10.6766	11.5744	13.316	12.6057	13.5903	14.7347	13.3429	13.5541	13.4401	13.3232	13.8226	13.2867	13.2861	13.9957	12.5198	10.7875	11.1572	12.1665	sp|Q9NQ38|ISK5_HUMAN
sp|Q9NQC3|RTN4_HUMAN	14.629	14.6401	14.9402	14.6948	14.2474	15.393	14.9475	14.2614	15.1469	11.923	14.1018	14.1452	14.6117	14.6465	14.9863	14.9887	14.4201	13.4448	14.6468	14.419	sp|Q9NQC3|RTN4_HUMAN
sp|Q9NQR4|NIT2_HUMAN	NA	NA	NA	NA	NA	NA	NA	13.2045	12.6559	11.7876	11.3579	NA	NA	10.7458	NA	11.3511	NA	11.1539	NA	NA	sp|Q9NQR4|NIT2_HUMAN
sp|Q9NQT8|KI13B_HUMAN	10.8614	NA	NA	NA	NA	NA	NA	13.299	11.3632	NA	NA	NA	NA	NA	10.5024	NA	NA	NA	10.4894	NA	sp|Q9NQT8|KI13B_HUMAN
sp|Q9NQW7|XPP1_HUMAN	NA	NA	10.874	10.755	10.3246	10.4828	11.3253	13.1826	12.2702	10.6193	NA	NA	NA	9.87091	11.3415	11.205	NA	11.2067	NA	NA	sp|Q9NQW7|XPP1_HUMAN
sp|Q9NQX3|GEPH_HUMAN	16.6525	16.3687	16.4694	15.609	16.1897	17.0464	16.6124	16.6112	15.2597	17.1221	15.7592	17.2247	16.6713	16.4832	16.6853	15.1422	16.4578	14.2356	16.7747	16.2313	sp|Q9NQX3|GEPH_HUMAN
sp|Q9NR46|SHLB2_HUMAN	NA	NA	NA	NA	NA	NA	NA	12.7776	12.1988	NA	NA	NA	NA	NA	NA	NA	NA	NA	NA	NA	sp|Q9NR46|SHLB2_HUMAN
sp|Q9NRD1|FBX6_HUMAN	12.064	12.1207	13.6142	13.5216	13.4342	12.9388	13.1748	14.125	13.2245	13.3207	13.0462	11.5851	12.9766	12.6396	12.9306	12.134	12.2532	12.3731	12.8567	13.4341	sp|Q9NRD1|FBX6_HUMAN
sp|Q9NRD8|DUOX2_HUMAN	NA	NA	NA	11.2227	NA	NA	NA	12.308	12.5928	11.82	11.7772	12.9641	11.5789	12.3729	NA	11.8443	NA	NA	NA	NA	sp|Q9NRD8|DUOX2_HUMAN;sp|Q9NRD9|DUOX1_HUMAN
sp|Q9NRP0|OSTC_HUMAN	13.3633	13.9971	12.9625	14.2766	13.8795	13.5974	13.9365	13.2051	14.2788	13.2213	12.4761	13.8245	13.5528	13.8274	14.4162	13.9452	13.3804	14.2582	14.0884	14.0285	sp|Q9NRP0|OSTC_HUMAN
sp|Q9NS86|LANC2_HUMAN	NA	NA	10.3497	NA	10.2607	9.86094	NA	NA	11.7876	NA	NA	NA	NA	NA	11.4046	NA	NA	NA	NA	NA	sp|Q9NS86|LANC2_HUMAN
sp|Q9NSB2|KRT84_HUMAN	12.268	15.7785	15.6739	16.0267	15.3067	16.5418	15.3547	16.1556	15.0603	16.0521	16.7866	14.3405	15.9027	17.3225	14.4265	17.4909	15.3647	17.5862	16.1519	14.398	sp|Q9NSB2|KRT84_HUMAN
sp|Q9NSB4|KRT82_HUMAN	11.7192	12.1106	11.9298	12.5713	11.9971	11.6931	11.5833	13.2972	12.3838	11.6694	12.6376	13.8124	11.9252	12.1542	11.5749	16.2811	13.2315	14.3364	14.62	12.2029	sp|Q9NSB4|KRT82_HUMAN
sp|Q9NSB8|HOME2_HUMAN	13.1138	NA	NA	NA	NA	12.0484	NA	NA	NA	NA	NA	NA	NA	NA	NA	NA	NA	NA	NA	NA	sp|Q9NSB8|HOME2_HUMAN
sp|Q9NTJ4|MA2C1_HUMAN	12.742	11.2826	14.6719	13.0867	14.3074	14.4466	12.7778	12.9386	14.875	14.5029	13.1106	13.7389	13.1777	13.6998	15.7483	14.0533	NA	13.0081	11.9422	11.1092	sp|Q9NTJ4|MA2C1_HUMAN
sp|Q9NTM9|CUTC_HUMAN	11.2142	10.854	11.4862	11.5964	11.7061	12.0901	NA	NA	11.9433	11.4227	12.3983	NA	11.4248	11.8917	12.3604	11.7755	NA	13.2434	11.9801	NA	sp|Q9NTM9|CUTC_HUMAN
sp|Q9NTQ9|CXB4_HUMAN	NA	11.6785	NA	11.1395	9.43899	11.6607	10.9159	11.4315	12.2504	NA	12.2738	12.0443	11.5014	12.1624	12.4674	10.6316	10.8944	11.3905	11.9545	11.7992	sp|Q9NTQ9|CXB4_HUMAN
sp|Q9NUJ7|PLCX1_HUMAN	14.8269	15.4727	15.3567	14.6117	14.9692	15.4019	15.3764	14.951	15.3146	16.236	15.84	15.4795	15.4347	16.0125	15.9157	14.924	15.1447	15.7682	15.4274	15.6843	sp|Q9NUJ7|PLCX1_HUMAN
sp|Q9NUM4|T106B_HUMAN	14.5466	13.4099	13.9439	13.6689	13.6599	13.629	14.8501	13.8942	14.71	13.9147	14.3356	14.2078	14.6742	15.2668	15.0471	14.0156	15.2358	14.2988	14.0063	14.6155	sp|Q9NUM4|T106B_HUMAN
sp|Q9NUU7|DD19A_HUMAN	11.7316	11.1001	12.1744	11.0963	NA	12.8168	11.4134	13.2731	12.2587	NA	11.7192	11.6401	11.2259	11.7456	12.4027	11.6381	11.6973	NA	NA	13.0449	sp|Q9NUU7|DD19A_HUMAN;sp|Q9UMR2|DD19B_HUMAN
sp|Q9NV96|CC50A_HUMAN	NA	12.3436	11.3151	11.7365	12.3815	11.6579	11.3834	12.4314	12.531	NA	12.2882	12.8969	12.6074	13.093	12.7546	12.1511	11.5304	11.7849	13.0545	12.64	sp|Q9NV96|CC50A_HUMAN
sp|Q9NVJ2|ARL8B_HUMAN	13.0467	NA	NA	NA	NA	NA	NA	13.8108	12.8348	NA	13.0035	NA	NA	NA	NA	NA	NA	NA	NA	13.0632	sp|Q9NVJ2|ARL8B_HUMAN
sp|Q9NW15|ANO10_HUMAN	NA	9.24394	11.2377	8.43193	9.61221	7.26423	9.46669	7.43581	8.83887	NA	NA	NA	NA	NA	7.51149	NA	NA	NA	9.35967	8.85715	sp|Q9NW15|ANO10_HUMAN
sp|Q9NWV8|BABA1_HUMAN	NA	NA	11.4357	NA	NA	9.7563	NA	10.6148	14.2028	NA	NA	NA	NA	10.658	13.3417	11.6185	NA	NA	9.56395	11.5928	sp|Q9NWV8|BABA1_HUMAN
sp|Q9NX46|ARHL2_HUMAN	NA	NA	NA	NA	NA	NA	NA	11.7204	12.9829	NA	NA	NA	NA	NA	12.8038	10.6562	NA	NA	NA	NA	sp|Q9NX46|ARHL2_HUMAN
sp|Q9NXV2|KCTD5_HUMAN	15.8461	16.0697	15.3683	15.4549	14.4768	15.9094	15.6208	15.6628	14.7012	15.0014	15.0408	15.586	14.6139	15.2493	15.491	15.4223	15.5375	15.4917	15.833	15.4499	sp|Q9NXV2|KCTD5_HUMAN
sp|Q9NXW2|DJB12_HUMAN	10.6397	10.5509	10.5983	9.85116	NA	11.5551	10.4921	10.1877	12.2591	NA	11.1201	10.7191	NA	11.2066	10.8384	10.6505	10.913	NA	10.806	10.5278	sp|Q9NXW2|DJB12_HUMAN
sp|Q9NY33|DPP3_HUMAN	NA	NA	NA	NA	NA	NA	NA	11.9425	13.4264	12.8203	NA	NA	NA	NA	11.8528	11.281	NA	13.677	NA	NA	sp|Q9NY33|DPP3_HUMAN
sp|Q9NY59|NSMA2_HUMAN	NA	NA	NA	11.6035	NA	NA	NA	11.1668	11.5545	NA	NA	11.42	NA	10.7183	NA	11.5516	NA	NA	12.0841	NA	sp|Q9NY59|NSMA2_HUMAN
sp|Q9NYU2|UGGG1_HUMAN	13.3023	12.8278	13.7485	14.2127	13.7992	13.7313	12.7981	13.3849	14.9905	14.3216	14.4746	13.2367	13.8555	14.2676	14.7481	14.5278	13.0055	14.6101	13.8531	14.5158	sp|Q9NYU2|UGGG1_HUMAN
sp|Q9NZ01|TECR_HUMAN	13.1636	14.7606	12.9157	14.7935	13.7858	13.0012	13.65	14.3393	13.6883	10.2095	12.8378	13.5827	14.23	14.2942	14.0083	14.1404	12.9229	12.4776	14.5047	16.0631	sp|Q9NZ01|TECR_HUMAN
sp|Q9NZ43|USE1_HUMAN	NA	12.8403	NA	9.7915	NA	NA	NA	NA	NA	NA	13.1505	NA	NA	12.6979	NA	NA	NA	12.0554	NA	NA	sp|Q9NZ43|USE1_HUMAN
sp|Q9NZC3|GDE1_HUMAN	11.3981	11.9225	11.9339	12.7062	12.0196	12.6107	11.5428	13.1	13.3943	NA	12.9513	13.0525	12.5383	12.9256	13.0745	12.6251	12.7724	13.1709	12.7204	12.6121	sp|Q9NZC3|GDE1_HUMAN
sp|Q9NZD2|GLTP_HUMAN	11.9701	NA	11.6313	12.5811	12.2002	12.361	12.7001	14.1381	14.0479	12.3261	12.6484	11.7835	12.8736	13.3074	12.2484	12.715	12.1662	12.0928	11.3073	12.2767	sp|Q9NZD2|GLTP_HUMAN
sp|Q9NZH6|IL37_HUMAN	15.7235	15.5405	14.1329	15.8209	13.2422	14.3459	13.7243	17.7039	16.7698	18.2758	19.3463	13.7012	14.877	16.466	16.1939	15.5583	16.4038	18.9492	17.3265	14.6503	sp|Q9NZH6|IL37_HUMAN
sp|Q9NZH8|IL36G_HUMAN	18.6372	17.9929	16.8879	17.9971	17.837	17.7102	17.5252	18.1278	18.3764	17.8664	18.3411	17.2444	17.5051	18.0576	17.8852	18.6128	17.6183	18.9804	17.9056	18.0605	sp|Q9NZH8|IL36G_HUMAN
sp|Q9NZL9|MAT2B_HUMAN	NA	NA	NA	11.1957	NA	NA	NA	11.8429	12.6344	NA	9.96765	NA	NA	11.585	NA	NA	NA	NA	NA	11.976	sp|Q9NZL9|MAT2B_HUMAN
sp|Q9NZT1|CALL5_HUMAN	20.3708	18.8699	21.5618	19.4702	21.6246	23.4824	20.1179	20.9861	20.8297	19.2956	18.2259	18.3058	19.091	19.4731	21.1665	21.7073	19.274	20.2425	19.1496	19.7328	sp|Q9NZT1|CALL5_HUMAN
sp|Q9P003|CNIH4_HUMAN	13.9896	15.4092	15.1871	14.5798	12.8781	14.7861	12.6669	14.7511	15.8563	11.0104	14.1678	15.2056	14.2935	15.4352	15.3469	13.8765	13.5057	11.93	14.614	14.1369	sp|Q9P003|CNIH4_HUMAN
sp|Q9P0G3|KLK14_HUMAN	12.2229	10.8545	10.2487	NA	NA	NA	12.5304	12.262	12.3193	11.153	NA	9.38671	11.4528	11.0971	10.542	11.8048	10.2948	NA	10.6623	11.5341	sp|Q9P0G3|KLK14_HUMAN
sp|Q9P253|VPS18_HUMAN	14.2476	14.0594	14.9116	14.3419	14.4455	14.9046	14.2344	14.5046	14.8873	14.5789	14.2069	14.1822	14.4125	14.7269	14.9617	14.3561	14.5809	13.9597	14.817	14.5341	sp|Q9P253|VPS18_HUMAN
sp|Q9P258|RCC2_HUMAN	NA	NA	NA	NA	NA	NA	NA	NA	10.7114	NA	NA	NA	NA	NA	NA	NA	NA	11.905	NA	NA	sp|Q9P258|RCC2_HUMAN
sp|Q9P2D6|F135A_HUMAN	11.2142	10.3531	NA	NA	11.1923	11.2386	NA	NA	11.4656	NA	11.0547	NA	NA	NA	11.1983	10.383	NA	NA	NA	11.1218	sp|Q9P2D6|F135A_HUMAN
sp|Q9P2T1|GMPR2_HUMAN	13.8473	13.977	13.5106	14.4698	13.3862	14.0895	14.5493	14.3363	14.7943	14.3379	14.4229	14.1361	13.9812	15.2793	14.8328	14.4029	14.2344	13.6587	14.7343	14.3974	sp|Q9P2T1|GMPR2_HUMAN
sp|Q9UBC9|SPRR3_HUMAN	NA	NA	NA	NA	7.99877	NA	NA	NA	NA	6.95659	NA	NA	NA	NA	10.9484	11.0489	7.47773	11.6899	NA	10.1685	sp|Q9UBC9|SPRR3_HUMAN
sp|Q9UBG3|CRNN_HUMAN	14.9436	13.7727	14.8191	14.477	15.6664	16.1421	16.4618	16.2139	16.3252	16.6365	14.0327	15.9698	15.449	13.8026	16.1472	16.1688	14.3615	16.2316	15.0199	16.4154	sp|Q9UBG3|CRNN_HUMAN
sp|Q9UBH0|I36RA_HUMAN	12.597	12.2113	11.4889	11.6966	10.7693	12.2022	11.3265	14.3714	13.6743	12.0374	12.1476	11.7773	11.1561	11.3549	13.4252	12.7418	NA	12.8643	12.3374	12.7427	sp|Q9UBH0|I36RA_HUMAN
sp|Q9UBI6|GBG12_HUMAN	12.3845	NA	12.7396	12.6681	12.1029	13.2071	13.0913	13.2382	13.3799	12.7487	12.688	NA	12.692	12.6392	13.1964	12.8457	12.2094	13.3484	12.5592	12.5181	sp|Q9UBI6|GBG12_HUMAN
sp|Q9UBM7|DHCR7_HUMAN	14.4295	15.1216	14.6893	15.4988	14.663	14.7702	14.7108	13.9874	15.7506	10.8726	13.9187	14.9981	14.3171	14.9843	14.6097	14.1562	14.4913	14.6077	14.981	14.1357	sp|Q9UBM7|DHCR7_HUMAN
sp|Q9UBQ7|GRHPR_HUMAN	NA	NA	NA	NA	NA	NA	NA	11.6166	15.101	9.20239	10.1225	NA	NA	NA	NA	10.1951	NA	9.90243	NA	NA	sp|Q9UBQ7|GRHPR_HUMAN
sp|Q9UBV2|SE1L1_HUMAN	NA	NA	9.28664	10.1936	9.3737	9.57562	NA	10.5218	12.0399	9.2694	11.0002	10.1778	10.3374	10.7929	10.8134	9.34245	9.38739	9.16558	9.72704	9.27755	sp|Q9UBV2|SE1L1_HUMAN
sp|Q9UBV8|PEF1_HUMAN	11.9109	NA	12.9672	NA	12.1357	12.97	12.7101	14.0546	14.08	14.2249	12.9093	11.5974	12.7062	13.3091	13.682	14.0066	12.4728	13.096	12.1173	13.6017	sp|Q9UBV8|PEF1_HUMAN
sp|Q9UBX7|KLK11_HUMAN	13.5912	12.6155	13.8426	14.1077	13.4896	13.9018	12.8052	14.1411	13.9484	13.9047	14.2932	13.3861	14.0491	14.2012	14.1783	14.0284	13.5493	13.2614	12.9413	13.5724	sp|Q9UBX7|KLK11_HUMAN
sp|Q9UEU0|VTI1B_HUMAN	14.0061	13.8227	13.2006	13.867	12.7773	13.5854	13.5214	13.8584	14.1791	NA	14.6651	14.0865	14.094	14.3944	14.4593	14.4496	13.7244	13.766	14.1463	14.5485	sp|Q9UEU0|VTI1B_HUMAN
sp|Q9UFN0|NPS3A_HUMAN	11.1282	11.3395	13.5198	13.9533	13.2295	13.4665	12.4496	13.4245	13.5181	12.4469	13.2324	13.9712	13.8199	14.5829	14.2817	13.4436	12.5052	11.4366	14.5603	13.144	sp|Q9UFN0|NPS3A_HUMAN
sp|Q9UGL9|CRCT1_HUMAN	12.4359	NA	NA	NA	NA	NA	11.4907	13.6078	13.063	NA	NA	12.1581	12.0929	NA	NA	12.4979	12.594	NA	10.5632	NA	sp|Q9UGL9|CRCT1_HUMAN
sp|Q9UGM3|DMBT1_HUMAN	15.4894	12.9154	10.2329	14.5169	14.3793	11.5588	13.7973	13.5919	12.9516	13.6499	11.6562	12.3297	13.5438	12.4233	12.1921	17.0263	14.2544	13.9719	12.4272	14.2474	sp|Q9UGM3|DMBT1_HUMAN
sp|Q9UH99|SUN2_HUMAN	13.3876	12.2625	12.6977	12.7865	12.9696	12.8984	12.8774	12.4993	13.5345	12.8692	13.9523	12.9015	13.558	13.3022	13.1429	13.4729	12.5846	12.3375	12.956	13.2025	sp|Q9UH99|SUN2_HUMAN
sp|Q9UHA4|LTOR3_HUMAN	13.5714	NA	13.9294	13.6103	13.5734	13.4347	13.4281	14.7532	14.2233	13.8277	14.2008	NA	13.9367	13.9951	14.0442	13.2151	14.193	13.6029	13.2246	14.0906	sp|Q9UHA4|LTOR3_HUMAN
sp|Q9UHG3|PCYOX_HUMAN	17.4813	17.2867	17.9423	17.7038	17.4436	17.3878	17.5352	18.1312	18.2995	17.4229	17.5328	17.2763	17.5519	17.6994	17.5682	17.6654	17.5616	17.4593	17.5571	17.9797	sp|Q9UHG3|PCYOX_HUMAN
sp|Q9UHL4|DPP2_HUMAN	17.2962	18.0666	18.3549	18.1045	17.9443	18.1089	17.8939	18.0985	17.8103	18.0747	17.7279	16.4879	17.5058	16.8768	17.5485	17.9548	17.4458	16.6871	17.607	18.1121	sp|Q9UHL4|DPP2_HUMAN
sp|Q9UHW9|S12A6_HUMAN	NA	12.2264	NA	10.7817	10.9432	10.9503	11.9675	NA	12.1924	NA	12.4102	12.7876	11.8723	12.1564	12.9833	NA	12.3536	11.7343	12.609	11.603	sp|Q9UHW9|S12A6_HUMAN
sp|Q9UI42|CBPA4_HUMAN	18.2583	17.4977	18.1694	17.8206	17.9101	16.611	17.1409	18.7452	19.7345	19.1466	19.1676	17.7465	18.4066	18.8387	18.198	17.574	17.9031	18.7194	17.954	17.7116	sp|Q9UI42|CBPA4_HUMAN
sp|Q9UIQ6|LCAP_HUMAN	14.5078	15.4447	14.59	15.1991	14.7495	14.1718	15.7135	15.6256	16.566	14.633	15.2909	15.3701	15.0271	15.5852	15.2452	15.1789	15.2799	15.0411	16.0411	15.0908	sp|Q9UIQ6|LCAP_HUMAN
sp|Q9UIV8|SPB13_HUMAN	17.3943	16.8551	16.7681	16.8345	16.347	17.1812	16.178	17.8307	16.9331	17.1047	16.9973	16.0867	16.7199	17.0968	16.6712	16.8487	16.8755	17.2622	17.1517	17.4715	sp|Q9UIV8|SPB13_HUMAN
sp|Q9UJ70|NAGK_HUMAN	12.9212	9.77447	13.8178	13.7164	11.9178	13.1866	10.7326	14.9832	14.901	14.0524	13.471	9.95093	13.3963	13.0627	13.9954	13.4106	13.3707	14.5026	13.2776	13.8766	sp|Q9UJ70|NAGK_HUMAN
sp|Q9UJ71|CLC4K_HUMAN	12.2644	11.917	NA	NA	NA	13.5699	NA	13.6547	10.8485	11.93	NA	NA	11.598	NA	NA	NA	NA	13.5555	12.7807	13.3381	sp|Q9UJ71|CLC4K_HUMAN
sp|Q9UJ83|HACL1_HUMAN	NA	NA	9.92821	NA	NA	10.7401	NA	9.15878	NA	NA	10.8223	NA	NA	NA	10.767	NA	10.4437	11.6085	10.7108	NA	sp|Q9UJ83|HACL1_HUMAN
sp|Q9UJU6|DBNL_HUMAN	12.3785	10.7081	11.343	11.2969	NA	11.0898	11.6143	13.9909	12.1434	12.1572	12.3308	10.2662	11.313	10.8484	11.4546	11.7917	11.5805	11.5851	11.1313	11.2111	sp|Q9UJU6|DBNL_HUMAN
sp|Q9UKK9|NUDT5_HUMAN	16.8546	16.3229	17.3755	16.8283	16.9893	17.0883	16.7744	17.1935	17.2299	17.8604	17.6666	16.9982	17.1017	16.9752	17.585	17.2987	17.2351	16.9259	16.9697	17.4637	sp|Q9UKK9|NUDT5_HUMAN
sp|Q9UKQ9|KLK9_HUMAN	13.1468	12.3264	NA	11.5608	11.8678	11.533	NA	14.8575	15.8685	14.2972	12.7575	NA	13.652	13.3871	12.3508	12.2428	NA	14.6983	13.3872	11.5072	sp|Q9UKQ9|KLK9_HUMAN
sp|Q9UKV8|AGO2_HUMAN	NA	NA	NA	NA	NA	NA	NA	11.8552	13.1932	NA	NA	11.5554	NA	NA	13.2845	11.8342	NA	NA	11.6498	11.908	sp|Q9UKV8|AGO2_HUMAN
sp|Q9UL18|AGO1_HUMAN	11.3351	NA	12.5372	13.2907	13.0111	13.2577	NA	13.1611	14.3796	12.3978	12.674	13.58	13.7843	13.8689	14.9571	14.1704	13.6745	13.5779	14.3716	13.8321	sp|Q9UL18|AGO1_HUMAN
sp|Q9UL25|RAB21_HUMAN	NA	10.4023	NA	NA	NA	10.3192	NA	11.0215	10.8947	NA	9.91118	NA	9.71363	9.26498	NA	10.0609	10.1737	NA	NA	NA	sp|Q9UL25|RAB21_HUMAN
sp|Q9ULA0|DNPEP_HUMAN	NA	NA	13.3155	10.1978	10.8408	NA	NA	11.3935	15.2326	12.9406	11.404	10.4835	11.3139	10.7378	12.8077	11.2532	NA	11.6809	NA	NA	sp|Q9ULA0|DNPEP_HUMAN
sp|Q9ULC3|RAB23_HUMAN	11.7828	12.1044	NA	12.8727	13.9451	NA	11.8755	NA	NA	14.6081	NA	13.1348	NA	11.78	12.6973	14.5585	12.9079	15.0293	14.4291	13.4245	sp|Q9ULC3|RAB23_HUMAN
sp|Q9ULC6|PADI1_HUMAN	13.8589	15.3666	14.7979	15.1013	15.955	15.7294	14.0869	16.9716	15.9214	15.5804	10.9973	14.1544	15.8265	14.794	14.9734	15.1965	15.8322	15.1945	15.2479	11.4272	sp|Q9ULC6|PADI1_HUMAN
sp|Q9ULI1|NWD2_HUMAN	21.6256	21.4934	21.3694	21.6294	21.7463	20.7703	21.3518	21.7489	21.1979	21.4626	20.948	20.8348	21.0775	20.4978	19.2731	21.2899	20.9267	21.1764	20.8762	21.424	sp|Q9ULI1|NWD2_HUMAN
sp|Q9ULV0|MYO5B_HUMAN	NA	NA	11.0672	NA	NA	NA	NA	12.4816	NA	11.5311	12.0093	NA	NA	NA	NA	NA	NA	11.3086	NA	10.6372	sp|Q9ULV0|MYO5B_HUMAN
sp|Q9ULZ3|ASC_HUMAN	NA	NA	NA	NA	NA	NA	NA	13.1615	12.2543	10.5769	9.9376	NA	9.96048	NA	8.17099	10.4811	9.44479	11.6832	NA	12.9614	sp|Q9ULZ3|ASC_HUMAN
sp|Q9UM00|TMCO1_HUMAN	10.452	11.3224	10.9552	11.5459	10.7541	11.016	11.0839	11.7955	12.2808	9.34886	10.145	11.3328	10.9812	11.9126	11.5054	10.8559	10.8166	11.2007	10.7911	10.9379	sp|Q9UM00|TMCO1_HUMAN
sp|Q9UM22|EPDR1_HUMAN	10.718	NA	10.0529	NA	NA	11.0678	10.588	10.5075	11.592	11.3448	NA	11.3301	NA	10.968	11.1163	11.2709	10.6775	NA	9.62376	9.94168	sp|Q9UM22|EPDR1_HUMAN
sp|Q9UM54|MYO6_HUMAN	10.7076	NA	9.53275	10.852	NA	NA	NA	12.6385	11.2444	NA	11.3891	NA	NA	NA	NA	10.214	9.35769	11.1517	10.8378	10.7484	sp|Q9UM54|MYO6_HUMAN
sp|Q9UN36|NDRG2_HUMAN	12.5214	11.4526	12.4244	13.519	12.1528	13.0321	12.1525	14.2751	14.7307	12.6903	11.3717	11.342	11.8569	11.7465	13.6714	12.4569	11.9713	12.5758	12.2319	12.5313	sp|Q9UN36|NDRG2_HUMAN
sp|Q9UN81|LORF1_HUMAN	12.7475	NA	NA	NA	NA	10.8439	NA	NA	NA	12.728	12.6373	NA	12.6612	12.5802	12.4372	11.9057	NA	12.3134	NA	11.3359	sp|Q9UN81|LORF1_HUMAN
sp|Q9UNF0|PACN2_HUMAN	10.1319	10.4917	10.9206	NA	NA	10.0962	NA	11.5189	11.5878	NA	10.8959	10.4188	11.3959	11.0773	NA	9.90232	10.7775	10.5737	9.78342	NA	sp|Q9UNF0|PACN2_HUMAN
sp|Q9UNK0|STX8_HUMAN	12.3247	13.6983	12.1248	11.4837	12.9957	12.4889	13.7934	13.6242	13.5644	NA	13.4921	13.2376	13.4232	13.1706	13.9936	13.7757	12.2392	13.4337	13.0542	12.9994	sp|Q9UNK0|STX8_HUMAN
sp|Q9UNZ2|NSF1C_HUMAN	NA	NA	NA	9.19271	NA	NA	10.5215	12.8219	9.74367	NA	NA	NA	NA	NA	NA	NA	NA	NA	NA	NA	sp|Q9UNZ2|NSF1C_HUMAN
sp|Q9UQ80|PA2G4_HUMAN	NA	NA	NA	NA	9.71339	10.4812	9.82673	13.0775	12.6098	10.9197	NA	NA	8.30957	10.565	10.776	11.0898	NA	11.0101	NA	10.4276	sp|Q9UQ80|PA2G4_HUMAN
sp|Q9UQB8|BAIP2_HUMAN	NA	11.5378	NA	NA	11.0784	11.8927	11.023	12.5497	11.752	11.3523	NA	NA	11.0601	11.4452	11.5625	10.895	11.6052	9.92505	11.2674	11.473	sp|Q9UQB8|BAIP2_HUMAN
sp|Q9Y251|HPSE_HUMAN	11.6628	11.3316	NA	11.4829	NA	10.5248	10.5787	14.5387	13.0135	13.104	12.7314	11.1367	12.6394	12.9217	11.8723	11.2851	13.3277	14.8211	13.1365	12.7806	sp|Q9Y251|HPSE_HUMAN
sp|Q9Y262|EIF3L_HUMAN	NA	NA	NA	NA	NA	NA	NA	12.9771	11.2379	NA	NA	NA	NA	NA	NA	NA	NA	NA	NA	NA	sp|Q9Y262|EIF3L_HUMAN
sp|Q9Y277|VDAC3_HUMAN	NA	10.5535	12.7391	11.39	11.7775	11.784	NA	11.7369	12.0165	9.15816	10.5339	9.58119	NA	11.8185	11.9233	11.0065	NA	10.8551	10.6008	10.3368	sp|Q9Y277|VDAC3_HUMAN
sp|Q9Y282|ERGI3_HUMAN	NA	NA	NA	11.4842	NA	NA	13.0084	NA	11.9794	NA	NA	11.9695	NA	14.9527	12.2628	NA	NA	NA	12.0018	NA	sp|Q9Y282|ERGI3_HUMAN
sp|Q9Y2E5|MA2B2_HUMAN	14.6399	13.6924	14.175	14.1897	13.6765	13.7163	13.9164	13.3666	14.926	15.7495	15.1128	15.4496	14.0209	15.7809	14.4319	14.7746	14.2946	13.8829	14.263	14.0041	sp|Q9Y2E5|MA2B2_HUMAN
sp|Q9Y2G3|AT11B_HUMAN	12.0742	12.8497	11.44	NA	11.9351	11.7576	12.5292	NA	12.9559	NA	11.722	12.5533	12.2651	12.3181	12.437	12.2911	11.3986	11.2707	12.1177	11.9103	sp|Q9Y2G3|AT11B_HUMAN
sp|Q9Y2T3|GUAD_HUMAN	13.0294	11.4262	14.088	12.5311	NA	12.733	13.206	11.8582	15.9357	14.5639	13.9666	12.3328	NA	13.2848	12.162	15.2937	12.4912	16.4236	11.4465	11.7901	sp|Q9Y2T3|GUAD_HUMAN
sp|Q9Y2U8|MAN1_HUMAN	NA	NA	NA	NA	NA	10.1557	NA	NA	10.777	NA	NA	NA	NA	NA	NA	NA	NA	NA	NA	NA	sp|Q9Y2U8|MAN1_HUMAN
sp|Q9Y315|DEOC_HUMAN	NA	NA	14.2005	13.4989	13.1326	13.474	11.6149	12.1659	14.264	12.0644	11.4755	12.3468	13.5512	12.7483	14.1709	13.5654	NA	11.3581	11.652	13.3414	sp|Q9Y315|DEOC_HUMAN
sp|Q9Y316|MEMO1_HUMAN	15.7105	13.6264	16.8633	16.2777	16.7985	16.3801	14.9929	14.981	17.6477	17.5719	16.7357	15.946	16.0464	16.9968	17.5644	17.2918	15.6679	16.7034	15.6372	16.6239	sp|Q9Y316|MEMO1_HUMAN
sp|Q9Y333|LSM2_HUMAN	NA	NA	NA	NA	NA	NA	NA	10.236	NA	12.6588	NA	NA	NA	NA	NA	NA	NA	NA	NA	NA	sp|Q9Y333|LSM2_HUMAN
sp|Q9Y337|KLK5_HUMAN	15.3239	14.6498	14.1761	14.4727	13.7444	14.0419	14.4419	15.4806	14.9135	14.9349	15.1619	13.687	14.452	15.311	14.9794	15.2095	13.9446	13.6725	14.604	14.4777	sp|Q9Y337|KLK5_HUMAN
sp|Q9Y342|PLLP_HUMAN	13.5667	13.3373	12.7389	14.8106	11.7843	10.9811	14.0277	11.2892	14.0168	NA	11.4321	14.6955	12.1879	13.0899	11.9901	NA	NA	NA	12.6216	NA	sp|Q9Y342|PLLP_HUMAN
sp|Q9Y3A6|TMED5_HUMAN	13.2924	12.7714	12.8787	12.9958	13.5182	13.2704	13.5222	13.4013	13.823	13.3798	13.7024	13.7338	13.7497	14.0047	12.9238	13.756	14.2266	13.1924	13.6624	13.7716	sp|Q9Y3A6|TMED5_HUMAN
sp|Q9Y3B3|TMED7_HUMAN	13.1479	12.418	12.752	12.7636	12.8944	13.4704	14.2393	13.9686	14.0409	13.4007	12.8601	13.6087	14.3007	14.2056	13.9216	14.2782	13.1588	13.4365	13.6233	14.2599	sp|Q9Y3B3|TMED7_HUMAN
sp|Q9Y3B8|ORN_HUMAN	13.6887	11.9093	15.5289	15.5919	15.2083	15.9206	12.9566	15.8879	17.0975	15.6728	15.1816	15.3272	15.7266	16.3827	16.5805	16.2363	15.7885	15.7076	16.2569	16.1182	sp|Q9Y3B8|ORN_HUMAN
sp|Q9Y3E0|GOT1B_HUMAN	10.8491	11.9335	NA	11.6402	10.5289	12.1663	10.958	11.7233	13.3033	NA	10.9065	12.8867	11.4389	12.6063	12.2025	11.2318	11.5631	9.73699	12.1555	11.7704	sp|Q9Y3E0|GOT1B_HUMAN
sp|Q9Y3F4|STRAP_HUMAN	NA	NA	NA	NA	NA	NA	NA	11.9976	12.7249	NA	NA	NA	NA	NA	NA	NA	NA	11.0842	NA	NA	sp|Q9Y3F4|STRAP_HUMAN
sp|Q9Y3Q3|TMED3_HUMAN	13.7208	13.2177	13.4518	13.8814	13.515	13.777	13.3771	13.8122	13.1938	14.0401	12.5313	12.8091	14.4561	13.7759	14.1963	14.0033	14.0848	13.2843	13.3838	13.6875	sp|Q9Y3Q3|TMED3_HUMAN
sp|Q9Y3R4|NEUR2_HUMAN	17.1882	18.4442	18.4124	18.7516	18.6684	18.6708	18.7169	19.7849	19.2591	19.1712	19.4128	19.5381	19.1088	19.6215	18.5616	19.0786	19.4645	18.7084	19.2346	19.5391	sp|Q9Y3R4|NEUR2_HUMAN
sp|Q9Y446|PKP3_HUMAN	NA	NA	NA	NA	NA	10.8877	NA	13.1913	NA	NA	NA	NA	NA	NA	NA	NA	NA	10.8616	NA	NA	sp|Q9Y446|PKP3_HUMAN
sp|Q9Y487|VPP2_HUMAN	8.65199	8.56106	9.58096	9.01824	8.19396	8.51522	8.81949	10.177	10.823	8.59827	8.68738	9.03512	9.68416	9.06377	10.9051	10.7721	8.46675	11.0101	8.86577	8.71224	sp|Q9Y487|VPP2_HUMAN
sp|Q9Y490|TLN1_HUMAN	14.1428	13.6822	12.4304	13.4749	13.5298	14.3231	13.8679	12.2092	12.8899	11.8125	14.2551	12.6696	12.8451	13.7501	12.0927	12.2331	12.5193	14.0974	13.9353	13.5222	sp|Q9Y490|TLN1_HUMAN
sp|Q9Y4E8|UBP15_HUMAN	13.5216	NA	15.4188	14.3544	13.8537	15.6614	12.0445	15.1556	16.7681	16.5287	14.5643	14.96	15.5768	16.0058	16.5087	15.8439	15.5684	14.6866	15.52	16.5826	sp|Q9Y4E8|UBP15_HUMAN
sp|Q9Y4Y9|LSM5_HUMAN	10.8254	NA	NA	NA	NA	NA	NA	13.7817	13.578	11.7924	12.3125	NA	12.8196	NA	10.5471	11.5206	NA	12.0805	10.6865	10.9374	sp|Q9Y4Y9|LSM5_HUMAN
sp|Q9Y5B9|SP16H_HUMAN	NA	NA	12.0018	12.4192	NA	11.7089	NA	11.3827	12.6065	NA	12.3684	NA	NA	12.0269	12.5375	12.7753	NA	NA	NA	NA	sp|Q9Y5B9|SP16H_HUMAN
sp|Q9Y5K8|VATD_HUMAN	NA	NA	NA	NA	NA	NA	NA	13.1559	10.2347	NA	NA	NA	NA	NA	NA	NA	NA	NA	NA	NA	sp|Q9Y5K8|VATD_HUMAN
sp|Q9Y5M8|SRPRB_HUMAN	NA	NA	NA	NA	NA	10.9715	NA	11.3832	11.3093	11.2744	NA	NA	NA	10.8957	11.8705	NA	11.7591	NA	11.8052	NA	sp|Q9Y5M8|SRPRB_HUMAN
sp|Q9Y5U9|IR3IP_HUMAN	14.6385	14.3577	13.7503	14.1655	14.0699	14.6723	14.1158	14.4063	14.3099	11.9937	13.9927	14.4225	13.8629	14.222	14.2461	14.3866	14.403	13.8279	14.5985	14.7952	sp|Q9Y5U9|IR3IP_HUMAN
sp|Q9Y5X3|SNX5_HUMAN	11.2326	NA	11.8904	11.5047	11.1676	12.3588	NA	11.851	11.3629	NA	11.105	11.587	NA	11.884	11.5027	NA	NA	NA	NA	NA	sp|Q9Y5X3|SNX5_HUMAN
sp|Q9Y5Z4|HEBP2_HUMAN	12.5386	13.2808	13.1861	14.4344	13.9686	13.8251	13.7392	14.7249	15.1395	15.4841	14.6136	12.6181	14.7454	14.2892	14.6085	14.4662	13.8261	14.1918	14.0728	14.6258	sp|Q9Y5Z4|HEBP2_HUMAN
sp|Q9Y639|NPTN_HUMAN	11.6726	NA	12.372	11.5475	NA	NA	13.7428	13.7916	12.9049	13.3472	12.7434	13.4473	14.7184	13.5342	12.8923	13.8308	13.1405	12.7804	NA	NA	sp|Q9Y639|NPTN_HUMAN
sp|Q9Y646|CBPQ_HUMAN	13.5211	14.0416	14.2307	13.7844	14.3186	12.5247	13.6439	14.1185	14.1843	14.7349	14.5419	14.0834	14.0742	13.9636	13.3996	13.4775	13.5234	14.1832	13.6701	13.5094	sp|Q9Y646|CBPQ_HUMAN
sp|Q9Y6A9|SPCS1_HUMAN	NA	NA	10.2809	9.8391	NA	9.81694	NA	NA	11.8718	NA	10.7276	NA	NA	9.39859	NA	NA	NA	9.71258	10.4189	NA	sp|Q9Y6A9|SPCS1_HUMAN
sp|Q9Y6D9|MD1L1_HUMAN	12.5717	11.9937	NA	NA	NA	NA	NA	NA	NA	NA	12.0078	NA	NA	NA	NA	11.673	NA	NA	NA	11.6081	sp|Q9Y6D9|MD1L1_HUMAN
sp|Q9Y6R7|FCGBP_HUMAN	13.6158	12.97	13.7793	13.4144	14.3432	14.0173	12.098	14.2188	10.8755	13.4122	12.6763	12.8359	12.6941	13.1696	12.8609	14.5583	13.1182	13.2198	12.1641	14.2126	sp|Q9Y6R7|FCGBP_HUMAN
sp|Q9Y6Y8|S23IP_HUMAN	NA	NA	13.4845	NA	NA	NA	NA	NA	NA	NA	NA	NA	NA	NA	13.346	NA	NA	NA	NA	13.8413	sp|Q9Y6Y8|S23IP_HUMAN
