# Supplementary material for: Quantitative proteomics analysis of young and elderly skin with DIA mass spectrometry reveals new skin aging-related proteins
Source: Aging (Albany NY). 2020 Jun 29;12(13):13529–54. doi: 10.18632/aging.103461 (PMC7377841; doi:10.18632/aging.103461)
Supplement: Supplementary Table 4 [file aging-12-103461-s004..xlsx]

## Sheet: Sheet1
Table S4. GO classification of the identified proteins
Ontology	Class	number_of_Homo_sapiens	proteins_of_Homo_sapiens
biological_process	behavior	45	sp|Q9HB07|MYG1_HUMAN;sp|P27487|DPP4_HUMAN;sp|P01116|RASK_HUMAN;sp|Q9Y639|NPTN_HUMAN;sp|Q9HCJ1|ANKH_HUMAN;sp|P04179|SODM_HUMAN;sp|P55000|SLUR1_HUMAN;sp|P00492|HPRT_HUMAN;sp|P07686|HEXB_HUMAN;sp|P47895|AL1A3_HUMAN;sp|P10253|LYAG_HUMAN;sp|P04424|ARLY_HUMAN;sp|P00441|SODC_HUMAN;sp|P01034|CYTC_HUMAN;sp|P23526|SAHH_HUMAN;sp|P01019|ANGT_HUMAN;sp|P07996|TSP1_HUMAN;sp|Q9NTQ9|CXB4_HUMAN;sp|Q96QK1|VPS35_HUM…
biological_process	biological adhesion	112	sp|Q14574|DSC3_HUMAN;sp|Q08554|DSC1_HUMAN;sp|P32926|DSG3_HUMAN;sp|Q02487|DSC2_HUMAN;sp|Q86SJ6|DSG4_HUMAN;sp|Q9Y639|NPTN_HUMAN;sp|O15031|PLXB2_HUMAN;sp|P12830|CADH1_HUMAN;sp|Q02413|DSG1_HUMAN;sp|P05089|ARGI1_HUMAN;sp|P09382|LEG1_HUMAN;sp|P00747|PLMN_HUMAN;sp|P13761|2B17_HUMAN;sp|Q9Y6D9|MD1L1_HUMAN;sp|Q14956|GPNMB_HUMAN;sp|P01911|2B1F_HUMAN;sp|Q12955|ANK3_HUMAN;sp|P00491|PNPH_HUMAN;sp|P20036|DPA1_H…
biological_process	biological phase	1	sp|Q9NQ38|ISK5_HUMAN
biological_process	biological regulation	798	sp|P43686|PRS6B_HUMAN;sp|Q99436|PSB7_HUMAN;sp|Q16401|PSMD5_HUMAN;sp|P62195|PRS8_HUMAN;sp|Q13200|PSMD2_HUMAN;sp|P25786|PSA1_HUMAN;sp|P28070|PSB4_HUMAN;sp|P40306|PSB10_HUMAN;sp|P25787|PSA2_HUMAN;sp|P63010|AP2B1_HUMAN;sp|P25789|PSA4_HUMAN;sp|P49721|PSB2_HUMAN;sp|Q06323|PSME1_HUMAN;sp|O75832|PSD10_HUMAN;sp|O94973|AP2A2_HUMAN;sp|Q96CW1|AP2M1_HUMAN;sp|Q00610|CLH1_HUMAN;sp|P28065|PSB9_HUMAN;sp|O14818|PS…
biological_process	cell killing	28	sp|P05089|ARGI1_HUMAN;sp|Q14116|IL18_HUMAN;sp|P07437|TBB5_HUMAN;sp|P68371|TBB4B_HUMAN;sp|Q06830|PRDX1_HUMAN;sp|Q6UVW9|CLC2A_HUMAN;sp|P09668|CATH_HUMAN;sp|P53634|CATC_HUMAN;sp|O15400|STX7_HUMAN;sp|P61769|B2MG_HUMAN;sp|P00734|THRB_HUMAN;sp|P02538|K2C6A_HUMAN;sp|P48668|K2C6C_HUMAN;sp|P04259|K2C6B_HUMAN;sp|P08238|HS90B_HUMAN;sp|P48594|SPB4_HUMAN;sp|P50453|SPB9_HUMAN;sp|P04406|G3P_HUMAN;sp|P81605|DCD_…
biological_process	cell proliferation	150	sp|P05089|ARGI1_HUMAN;sp|P09601|HMOX1_HUMAN;sp|P09211|GSTP1_HUMAN;sp|P14174|MIF_HUMAN;sp|P00813|ADA_HUMAN;sp|P13761|2B17_HUMAN;sp|Q9Y6D9|MD1L1_HUMAN;sp|Q14956|GPNMB_HUMAN;sp|P01911|2B1F_HUMAN;sp|P78527|PRKDC_HUMAN;sp|P13010|XRCC5_HUMAN;sp|P07996|TSP1_HUMAN;sp|P25705|ATPA_HUMAN;sp|P02749|APOH_HUMAN;sp|P00491|PNPH_HUMAN;sp|P20036|DPA1_HUMAN;sp|P04083|ANXA1_HUMAN;sp|P13987|CD59_HUMAN;sp|P02751|FINC_…
biological_process	cellular component organization or biogenesis	550	sp|P59998|ARPC4_HUMAN;sp|P61158|ARP3_HUMAN;sp|P61160|ARP2_HUMAN;sp|O15144|ARPC2_HUMAN;sp|Q92747|ARC1A_HUMAN;sp|P47756|CAPZB_HUMAN;sp|P18206|VINC_HUMAN;sp|Q7L576|CYFP1_HUMAN;sp|O75531|BAF_HUMAN;sp|P02545|LMNA_HUMAN;sp|Q8TEM1|PO210_HUMAN;sp|Q96EE3|SEH1_HUMAN;sp|Q8TDY2|RBCC1_HUMAN;sp|P08238|HS90B_HUMAN;sp|P04062|GLCM_HUMAN;sp|Q14204|DYHC1_HUMAN;sp|O00571|DDX3X_HUMAN;sp|P10809|CH60_HUMAN;sp|P15311|EZ…
biological_process	cellular process	1152	sp|P43686|PRS6B_HUMAN;sp|Q99436|PSB7_HUMAN;sp|Q16401|PSMD5_HUMAN;sp|P62195|PRS8_HUMAN;sp|Q13200|PSMD2_HUMAN;sp|P25786|PSA1_HUMAN;sp|P28070|PSB4_HUMAN;sp|P40306|PSB10_HUMAN;sp|P25787|PSA2_HUMAN;sp|P63010|AP2B1_HUMAN;sp|P25789|PSA4_HUMAN;sp|P49721|PSB2_HUMAN;sp|Q06323|PSME1_HUMAN;sp|O75832|PSD10_HUMAN;sp|O94973|AP2A2_HUMAN;sp|Q96CW1|AP2M1_HUMAN;sp|Q00610|CLH1_HUMAN;sp|P28065|PSB9_HUMAN;sp|O14818|PS…
biological_process	detoxification	15	sp|Q99497|PARK7_HUMAN;sp|P78417|GSTO1_HUMAN;sp|P68871|HBB_HUMAN;sp|P69905|HBA_HUMAN;sp|P62341|SELT_HUMAN;sp|P30041|PRDX6_HUMAN;sp|P05164|PERM_HUMAN;sp|P04179|SODM_HUMAN;sp|P32119|PRDX2_HUMAN;sp|Q06830|PRDX1_HUMAN;sp|P06727|APOA4_HUMAN;sp|P00441|SODC_HUMAN;sp|Q15166|PON3_HUMAN;sp|P10768|ESTD_HUMAN;sp|P21266|GSTM3_HUMAN
biological_process	developmental process	536	sp|P43686|PRS6B_HUMAN;sp|Q99436|PSB7_HUMAN;sp|Q16401|PSMD5_HUMAN;sp|P62195|PRS8_HUMAN;sp|Q13200|PSMD2_HUMAN;sp|P25786|PSA1_HUMAN;sp|P28070|PSB4_HUMAN;sp|P40306|PSB10_HUMAN;sp|P25787|PSA2_HUMAN;sp|P63010|AP2B1_HUMAN;sp|P25789|PSA4_HUMAN;sp|P49721|PSB2_HUMAN;sp|Q06323|PSME1_HUMAN;sp|O75832|PSD10_HUMAN;sp|O94973|AP2A2_HUMAN;sp|Q96CW1|AP2M1_HUMAN;sp|Q00610|CLH1_HUMAN;sp|P28065|PSB9_HUMAN;sp|O14818|PS…
biological_process	growth	79	sp|O75326|SEM7A_HUMAN;sp|P62491|RB11A_HUMAN;sp|P02751|FINC_HUMAN;sp|P43034|LIS1_HUMAN;sp|P31150|GDIA_HUMAN;sp|Q7L576|CYFP1_HUMAN;sp|P07602|SAP_HUMAN;sp|Q6NUJ1|SAPL1_HUMAN;sp|P29373|RABP2_HUMAN;sp|Q13882|PTK6_HUMAN;sp|O15296|LX15B_HUMAN;sp|Q9NQC3|RTN4_HUMAN;sp|P61158|ARP3_HUMAN;sp|P05164|PERM_HUMAN;sp|Q9Y646|CBPQ_HUMAN;sp|P05090|APOD_HUMAN;sp|Q92876|KLK6_HUMAN;sp|P06396|GELS_HUMAN;sp|P00747|PLMN_H…
biological_process	immune system process	391	sp|Q9NQ38|ISK5_HUMAN;sp|Q07021|C1QBP_HUMAN;sp|P05089|ARGI1_HUMAN;sp|P78527|PRKDC_HUMAN;sp|Q9NP55|BPIA1_HUMAN;sp|Q9UJ71|CLC4K_HUMAN;sp|Q9H0P0|5NT3A_HUMAN;sp|Q9UGM3|DMBT1_HUMAN;sp|Q9ULZ3|ASC_HUMAN;sp|P59665|DEF1_HUMAN;sp|O15455|TLR3_HUMAN;sp|O94804|STK10_HUMAN;sp|P14174|MIF_HUMAN;sp|P00813|ADA_HUMAN;sp|Q16610|ECM1_HUMAN;sp|P13761|2B17_HUMAN;sp|Q9Y6D9|MD1L1_HUMAN;sp|Q14956|GPNMB_HUMAN;sp|P01911|2B1F…
biological_process	localization	655	sp|P42785|PCP_HUMAN;sp|O15296|LX15B_HUMAN;sp|P55000|SLUR1_HUMAN;sp|P18206|VINC_HUMAN;sp|P58107|EPIPL_HUMAN;sp|Q14118|DAG1_HUMAN;sp|P08779|K1C16_HUMAN;sp|O00560|SDCB1_HUMAN;sp|P10253|LYAG_HUMAN;sp|Q15121|PEA15_HUMAN;sp|Q99816|TS101_HUMAN;sp|Q9H4M9|EHD1_HUMAN;sp|Q92783|STAM1_HUMAN;sp|Q5VT79|AXA81_HUMAN;sp|P61026|RAB10_HUMAN;sp|Q9NP79|VTA1_HUMAN;sp|Q07021|C1QBP_HUMAN;sp|P05109|S10A8_HUMAN;sp|P06702|…
biological_process	locomotion	128	sp|P42785|PCP_HUMAN;sp|O15296|LX15B_HUMAN;sp|P55000|SLUR1_HUMAN;sp|P18206|VINC_HUMAN;sp|P58107|EPIPL_HUMAN;sp|Q14118|DAG1_HUMAN;sp|P08779|K1C16_HUMAN;sp|Q07021|C1QBP_HUMAN;sp|P80108|PHLD_HUMAN;sp|O94804|STK10_HUMAN;sp|P06396|GELS_HUMAN;sp|P07996|TSP1_HUMAN;sp|P14174|MIF_HUMAN;sp|P43034|LIS1_HUMAN;sp|P21333|FLNA_HUMAN;sp|P62937|PPIA_HUMAN;sp|P51149|RAB7A_HUMAN;sp|P35908|K22E_HUMAN;sp|P02751|FINC_H…
biological_process	metabolic process	885	sp|P10599|THIO_HUMAN;sp|P22234|PUR6_HUMAN;sp|P22102|PUR2_HUMAN;sp|P55072|TERA_HUMAN;sp|P43686|PRS6B_HUMAN;sp|Q99436|PSB7_HUMAN;sp|Q16401|PSMD5_HUMAN;sp|P62195|PRS8_HUMAN;sp|Q13200|PSMD2_HUMAN;sp|P25786|PSA1_HUMAN;sp|P0CG47|UBB_HUMAN;sp|P28070|PSB4_HUMAN;sp|P40306|PSB10_HUMAN;sp|P25787|PSA2_HUMAN;sp|P25789|PSA4_HUMAN;sp|P49721|PSB2_HUMAN;sp|Q06323|PSME1_HUMAN;sp|O75832|PSD10_HUMAN;sp|P28065|PSB9_H…
biological_process	multi-organism process	232	sp|Q9NQ38|ISK5_HUMAN;sp|P07355|ANXA2_HUMAN;sp|Q86W26|NAL10_HUMAN;sp|P54652|HSP72_HUMAN;sp|Q9NP55|BPIA1_HUMAN;sp|Q9UJ71|CLC4K_HUMAN;sp|Q9H0P0|5NT3A_HUMAN;sp|Q9UGM3|DMBT1_HUMAN;sp|Q9ULZ3|ASC_HUMAN;sp|P59665|DEF1_HUMAN;sp|O15455|TLR3_HUMAN;sp|P02788|TRFL_HUMAN;sp|Q9GZZ8|LACRT_HUMAN;sp|P30153|2AAA_HUMAN;sp|P05089|ARGI1_HUMAN;sp|Q99816|TS101_HUMAN;sp|Q14974|IMB1_HUMAN;sp|Q8TEM1|PO210_HUMAN;sp|Q96EE3|S…
biological_process	multicellular organismal process	602	sp|P43686|PRS6B_HUMAN;sp|Q99436|PSB7_HUMAN;sp|Q16401|PSMD5_HUMAN;sp|P62195|PRS8_HUMAN;sp|Q13200|PSMD2_HUMAN;sp|P25786|PSA1_HUMAN;sp|P28070|PSB4_HUMAN;sp|P40306|PSB10_HUMAN;sp|P25787|PSA2_HUMAN;sp|P63010|AP2B1_HUMAN;sp|P25789|PSA4_HUMAN;sp|P49721|PSB2_HUMAN;sp|Q06323|PSME1_HUMAN;sp|O75832|PSD10_HUMAN;sp|O94973|AP2A2_HUMAN;sp|Q96CW1|AP2M1_HUMAN;sp|Q00610|CLH1_HUMAN;sp|P28065|PSB9_HUMAN;sp|O14818|PS…
biological_process	negative regulation of biological process	382	sp|O15296|LX15B_HUMAN;sp|P55000|SLUR1_HUMAN;sp|P18206|VINC_HUMAN;sp|P58107|EPIPL_HUMAN;sp|Q14118|DAG1_HUMAN;sp|P08779|K1C16_HUMAN;sp|Q15121|PEA15_HUMAN;sp|Q9NQ38|ISK5_HUMAN;sp|P05089|ARGI1_HUMAN;sp|P07355|ANXA2_HUMAN;sp|Q99816|TS101_HUMAN;sp|Q92783|STAM1_HUMAN;sp|P09601|HMOX1_HUMAN;sp|P09211|GSTP1_HUMAN;sp|P09382|LEG1_HUMAN;sp|P00747|PLMN_HUMAN;sp|P02652|APOA2_HUMAN;sp|P78527|PRKDC_HUMAN;sp|P0675…
biological_process	nitrogen utilization	2	sp|P04424|ARLY_HUMAN;sp|P15104|GLNA_HUMAN
biological_process	pigmentation	9	sp|P40967|PMEL_HUMAN;sp|O75787|RENR_HUMAN;sp|P62491|RB11A_HUMAN;sp|P62820|RAB1A_HUMAN;sp|O00194|RB27B_HUMAN;sp|P04179|SODM_HUMAN;sp|P48444|COPD_HUMAN;sp|Q01546|K22O_HUMAN;sp|P63244|RACK1_HUMAN
biological_process	positive regulation of biological process	436	sp|P59998|ARPC4_HUMAN;sp|P61158|ARP3_HUMAN;sp|P61160|ARP2_HUMAN;sp|O15144|ARPC2_HUMAN;sp|Q92747|ARC1A_HUMAN;sp|P55072|TERA_HUMAN;sp|P02671|FIBA_HUMAN;sp|P02679|FIBG_HUMAN;sp|P02675|FIBB_HUMAN;sp|P04062|GLCM_HUMAN;sp|Q07021|C1QBP_HUMAN;sp|P43686|PRS6B_HUMAN;sp|Q99436|PSB7_HUMAN;sp|Q16401|PSMD5_HUMAN;sp|P62195|PRS8_HUMAN;sp|Q13200|PSMD2_HUMAN;sp|P25786|PSA1_HUMAN;sp|P28070|PSB4_HUMAN;sp|P40306|PSB1…
biological_process	presynaptic process involved in chemical synaptic transmission	16	sp|P20336|RAB3A_HUMAN;sp|Q99497|PARK7_HUMAN;sp|P0DP23|CALM1_HUMAN;sp|P20339|RAB5A_HUMAN;sp|P54920|SNAA_HUMAN;sp|Q02083|NAAA_HUMAN;sp|Q9H3Z4|DNJC5_HUMAN;sp|P63027|VAMP2_HUMAN;sp|P11142|HSP7C_HUMAN;sp|P50897|PPT1_HUMAN;sp|O00161|SNP23_HUMAN;sp|O95721|SNP29_HUMAN;sp|O00429|DNM1L_HUMAN;sp|P61224|RAP1B_HUMAN;sp|P62834|RAP1A_HUMAN;sp|P16615|AT2A2_HUMAN
biological_process	regulation of biological process	750	sp|P43686|PRS6B_HUMAN;sp|Q99436|PSB7_HUMAN;sp|Q16401|PSMD5_HUMAN;sp|P62195|PRS8_HUMAN;sp|Q13200|PSMD2_HUMAN;sp|P25786|PSA1_HUMAN;sp|P28070|PSB4_HUMAN;sp|P40306|PSB10_HUMAN;sp|P25787|PSA2_HUMAN;sp|P63010|AP2B1_HUMAN;sp|P25789|PSA4_HUMAN;sp|P49721|PSB2_HUMAN;sp|Q06323|PSME1_HUMAN;sp|O75832|PSD10_HUMAN;sp|O94973|AP2A2_HUMAN;sp|Q96CW1|AP2M1_HUMAN;sp|Q00610|CLH1_HUMAN;sp|P28065|PSB9_HUMAN;sp|O14818|PS…
biological_process	reproduction	80	sp|P21964|COMT_HUMAN;sp|P54652|HSP72_HUMAN;sp|O75874|IDHC_HUMAN;sp|P30153|2AAA_HUMAN;sp|P01034|CYTC_HUMAN;sp|P51659|DHB4_HUMAN;sp|Q15363|TMED2_HUMAN;sp|P30048|PRDX3_HUMAN;sp|P04279|SEMG1_HUMAN;sp|P00747|PLMN_HUMAN;sp|P07602|SAP_HUMAN;sp|Q6NUJ1|SAPL1_HUMAN;sp|P36952|SPB5_HUMAN;sp|P61158|ARP3_HUMAN;sp|P61160|ARP2_HUMAN;sp|Q96GC9|VMP1_HUMAN;sp|Q92824|PCSK5_HUMAN;sp|Q16270|IBP7_HUMAN;sp|P00441|SODC_H…
biological_process	reproductive process	80	sp|P21964|COMT_HUMAN;sp|P54652|HSP72_HUMAN;sp|O75874|IDHC_HUMAN;sp|P30153|2AAA_HUMAN;sp|P01034|CYTC_HUMAN;sp|P51659|DHB4_HUMAN;sp|Q15363|TMED2_HUMAN;sp|P30048|PRDX3_HUMAN;sp|P04279|SEMG1_HUMAN;sp|P00747|PLMN_HUMAN;sp|P07602|SAP_HUMAN;sp|Q6NUJ1|SAPL1_HUMAN;sp|P36952|SPB5_HUMAN;sp|P61158|ARP3_HUMAN;sp|P61160|ARP2_HUMAN;sp|Q96GC9|VMP1_HUMAN;sp|Q92824|PCSK5_HUMAN;sp|Q16270|IBP7_HUMAN;sp|P00441|SODC_H…
biological_process	response to stimulus	740	sp|P43686|PRS6B_HUMAN;sp|Q99436|PSB7_HUMAN;sp|Q16401|PSMD5_HUMAN;sp|P62195|PRS8_HUMAN;sp|Q13200|PSMD2_HUMAN;sp|P25786|PSA1_HUMAN;sp|P28070|PSB4_HUMAN;sp|P40306|PSB10_HUMAN;sp|P25787|PSA2_HUMAN;sp|P63010|AP2B1_HUMAN;sp|P25789|PSA4_HUMAN;sp|P49721|PSB2_HUMAN;sp|Q06323|PSME1_HUMAN;sp|O75832|PSD10_HUMAN;sp|O94973|AP2A2_HUMAN;sp|Q96CW1|AP2M1_HUMAN;sp|Q00610|CLH1_HUMAN;sp|P28065|PSB9_HUMAN;sp|O14818|PS…
biological_process	rhythmic process	17	sp|P01034|CYTC_HUMAN;sp|P43490|NAMPT_HUMAN;sp|P23526|SAHH_HUMAN;sp|Q969G5|CAVN3_HUMAN;sp|O14744|ANM5_HUMAN;sp|P62136|PP1A_HUMAN;sp|P54802|ANAG_HUMAN;sp|P00813|ADA_HUMAN;sp|P78527|PRKDC_HUMAN;sp|P14921|ETS1_HUMAN;sp|P09237|MMP7_HUMAN;sp|P04083|ANXA1_HUMAN;sp|P63244|RACK1_HUMAN;sp|O95470|SGPL1_HUMAN;sp|P35232|PHB_HUMAN;sp|P35221|CTNA1_HUMAN;sp|P00441|SODC_HUMAN
biological_process	signaling	437	sp|P43686|PRS6B_HUMAN;sp|Q99436|PSB7_HUMAN;sp|Q16401|PSMD5_HUMAN;sp|P62195|PRS8_HUMAN;sp|Q13200|PSMD2_HUMAN;sp|P25786|PSA1_HUMAN;sp|P28070|PSB4_HUMAN;sp|P40306|PSB10_HUMAN;sp|P25787|PSA2_HUMAN;sp|P63010|AP2B1_HUMAN;sp|P25789|PSA4_HUMAN;sp|P49721|PSB2_HUMAN;sp|Q06323|PSME1_HUMAN;sp|O75832|PSD10_HUMAN;sp|O94973|AP2A2_HUMAN;sp|Q96CW1|AP2M1_HUMAN;sp|Q00610|CLH1_HUMAN;sp|P28065|PSB9_HUMAN;sp|O14818|PS…
cellular_component	cell	1215	sp|P13473|LAMP2_HUMAN;sp|P29033|CXB2_HUMAN;sp|P07910|HNRPC_HUMAN;sp|Q9UKV8|AGO2_HUMAN;sp|O43707|ACTN4_HUMAN;sp|P13639|EF2_HUMAN;sp|P06748|NPM_HUMAN;sp|P61247|RS3A_HUMAN;sp|P51991|ROA3_HUMAN;sp|P09651|ROA1_HUMAN;sp|P14678|RSMB_HUMAN;sp|P11142|HSP7C_HUMAN;sp|P31942|HNRH3_HUMAN;sp|P10155|RO60_HUMAN;sp|Q9Y4Y9|LSM5_HUMAN;sp|P04406|G3P_HUMAN;sp|P07814|SYEP_HUMAN;sp|P05388|RLA0_HUMAN;sp|P35268|RL22_HUMA…
cellular_component	cell junction	146	sp|Q9UKV8|AGO2_HUMAN;sp|O00429|DNM1L_HUMAN;sp|P15924|DESP_HUMAN;sp|Q9NSB8|HOME2_HUMAN;sp|O43707|ACTN4_HUMAN;sp|Q5T5C0|STXB5_HUMAN;sp|P52657|T2AG_HUMAN;sp|Q99720|SGMR1_HUMAN;sp|Q96CX2|KCD12_HUMAN;sp|P63027|VAMP2_HUMAN;sp|Q14574|DSC3_HUMAN;sp|P06702|S10A9_HUMAN;sp|Q9NTQ9|CXB4_HUMAN;sp|P0C0L5|CO4B_HUMAN;sp|O75131|CPNE3_HUMAN;sp|P00813|ADA_HUMAN;sp|Q99519|NEUR1_HUMAN;sp|Q9HCY8|S10AE_HUMAN;sp|P62166|N…
cellular_component	cell part	1215	sp|P13473|LAMP2_HUMAN;sp|P29033|CXB2_HUMAN;sp|P07910|HNRPC_HUMAN;sp|Q9UKV8|AGO2_HUMAN;sp|O43707|ACTN4_HUMAN;sp|P13639|EF2_HUMAN;sp|P06748|NPM_HUMAN;sp|P61247|RS3A_HUMAN;sp|P51991|ROA3_HUMAN;sp|P09651|ROA1_HUMAN;sp|P14678|RSMB_HUMAN;sp|P11142|HSP7C_HUMAN;sp|P31942|HNRH3_HUMAN;sp|P10155|RO60_HUMAN;sp|Q9Y4Y9|LSM5_HUMAN;sp|P04406|G3P_HUMAN;sp|P07814|SYEP_HUMAN;sp|P05388|RLA0_HUMAN;sp|P35268|RL22_HUMA…
cellular_component	extracellular region	834	sp|P01591|IGJ_HUMAN;sp|P07996|TSP1_HUMAN;sp|P02751|FINC_HUMAN;sp|P02671|FIBA_HUMAN;sp|P02679|FIBG_HUMAN;sp|P02675|FIBB_HUMAN;sp|Q86X29|LSR_HUMAN;sp|P02654|APOC1_HUMAN;sp|P04114|APOB_HUMAN;sp|P02647|APOA1_HUMAN;sp|P06727|APOA4_HUMAN;sp|P02749|APOH_HUMAN;sp|P02652|APOA2_HUMAN;sp|P02649|APOE_HUMAN;sp|P09104|ENOG_HUMAN;sp|Q14116|IL18_HUMAN;sp|Q9UI42|CBPA4_HUMAN;sp|P25311|ZA2G_HUMAN;sp|Q9Y646|CBPQ_HUM…
cellular_component	extracellular region part	801	sp|P01591|IGJ_HUMAN;sp|P07996|TSP1_HUMAN;sp|P02751|FINC_HUMAN;sp|P02671|FIBA_HUMAN;sp|P02679|FIBG_HUMAN;sp|P02675|FIBB_HUMAN;sp|Q86X29|LSR_HUMAN;sp|P02654|APOC1_HUMAN;sp|P04114|APOB_HUMAN;sp|P02647|APOA1_HUMAN;sp|P06727|APOA4_HUMAN;sp|P02749|APOH_HUMAN;sp|P02652|APOA2_HUMAN;sp|P02649|APOE_HUMAN;sp|P09104|ENOG_HUMAN;sp|Q14116|IL18_HUMAN;sp|Q9UI42|CBPA4_HUMAN;sp|P25311|ZA2G_HUMAN;sp|Q9Y646|CBPQ_HUM…
cellular_component	macromolecular complex	416	sp|P07910|HNRPC_HUMAN;sp|Q9UKV8|AGO2_HUMAN;sp|O43707|ACTN4_HUMAN;sp|P13639|EF2_HUMAN;sp|P06748|NPM_HUMAN;sp|P61247|RS3A_HUMAN;sp|P51991|ROA3_HUMAN;sp|P09651|ROA1_HUMAN;sp|P14678|RSMB_HUMAN;sp|P11142|HSP7C_HUMAN;sp|P31942|HNRH3_HUMAN;sp|P10155|RO60_HUMAN;sp|Q9Y4Y9|LSM5_HUMAN;sp|P04406|G3P_HUMAN;sp|P07814|SYEP_HUMAN;sp|P05388|RLA0_HUMAN;sp|P35268|RL22_HUMAN;sp|P0DMV8|HS71A_HUMAN;sp|P46940|IQGA1_HUM…
cellular_component	membrane	747	sp|P13473|LAMP2_HUMAN;sp|Q8TE68|ES8L1_HUMAN;sp|Q9UNF0|PACN2_HUMAN;sp|O75146|HIP1R_HUMAN;sp|P15531|NDKA_HUMAN;sp|P18085|ARF4_HUMAN;sp|P07900|HS90A_HUMAN;sp|Q12792|TWF1_HUMAN;sp|P23528|COF1_HUMAN;sp|Q9UM54|MYO6_HUMAN;sp|P23396|RS3_HUMAN;sp|O60610|DIAP1_HUMAN;sp|P06756|ITAV_HUMAN;sp|Q9Y490|TLN1_HUMAN;sp|P13796|PLSL_HUMAN;sp|Q9NQX3|GEPH_HUMAN;sp|P51151|RAB9A_HUMAN;sp|Q99523|SORT_HUMAN;sp|P62491|RB11A…
cellular_component	membrane part	473	sp|P13473|LAMP2_HUMAN;sp|Q8TE68|ES8L1_HUMAN;sp|Q9UNF0|PACN2_HUMAN;sp|O75146|HIP1R_HUMAN;sp|P15531|NDKA_HUMAN;sp|P18085|ARF4_HUMAN;sp|P07900|HS90A_HUMAN;sp|Q12792|TWF1_HUMAN;sp|P23528|COF1_HUMAN;sp|Q9UM54|MYO6_HUMAN;sp|P23396|RS3_HUMAN;sp|O60610|DIAP1_HUMAN;sp|P06756|ITAV_HUMAN;sp|Q9Y490|TLN1_HUMAN;sp|P13796|PLSL_HUMAN;sp|Q9NQX3|GEPH_HUMAN;sp|P63010|AP2B1_HUMAN;sp|Q00610|CLH1_HUMAN;sp|P14406|CX7A2…
cellular_component	membrane-enclosed lumen	503	sp|P10515|ODP2_HUMAN;sp|P62195|PRS8_HUMAN;sp|P68871|HBB_HUMAN;sp|P04114|APOB_HUMAN;sp|P69905|HBA_HUMAN;sp|P00738|HPT_HUMAN;sp|P14625|ENPL_HUMAN;sp|P07900|HS90A_HUMAN;sp|P0DJI8|SAA1_HUMAN;sp|P02790|HEMO_HUMAN;sp|Q13882|PTK6_HUMAN;sp|O43707|ACTN4_HUMAN;sp|Q9H0W9|CK054_HUMAN;sp|P62318|SMD3_HUMAN;sp|P61962|DCAF7_HUMAN;sp|Q9HAN9|NMNA1_HUMAN;sp|Q9HCY8|S10AE_HUMAN;sp|Q9H0E2|TOLIP_HUMAN;sp|P29144|TPP2_HU…
cellular_component	nucleoid	11	sp|P38646|GRP75_HUMAN;sp|P40939|ECHA_HUMAN;sp|P04179|SODM_HUMAN;sp|Q04837|SSBP_HUMAN;sp|P11182|ODB2_HUMAN;sp|P06576|ATPB_HUMAN;sp|Q96AG4|LRC59_HUMAN;sp|P21796|VDAC1_HUMAN;sp|P49748|ACADV_HUMAN;sp|P45880|VDAC2_HUMAN;sp|P05141|ADT2_HUMAN
cellular_component	organelle	1165	sp|P13473|LAMP2_HUMAN;sp|P54727|RD23B_HUMAN;sp|Q16658|FSCN1_HUMAN;sp|Q9UM54|MYO6_HUMAN;sp|P67936|TPM4_HUMAN;sp|P21333|FLNA_HUMAN;sp|P50995|ANX11_HUMAN;sp|P51151|RAB9A_HUMAN;sp|O75396|SC22B_HUMAN;sp|P09543|CN37_HUMAN;sp|P27105|STOM_HUMAN;sp|P11021|BIP_HUMAN;sp|P49755|TMEDA_HUMAN;sp|P40121|CAPG_HUMAN;sp|Q16563|SYPL1_HUMAN;sp|Q9H3Z4|DNJC5_HUMAN;sp|P62820|RAB1A_HUMAN;sp|Q8WUM4|PDC6I_HUMAN;sp|P30101|P…
cellular_component	organelle part	905	sp|P13473|LAMP2_HUMAN;sp|P54727|RD23B_HUMAN;sp|Q16658|FSCN1_HUMAN;sp|Q9UM54|MYO6_HUMAN;sp|P67936|TPM4_HUMAN;sp|P21333|FLNA_HUMAN;sp|Q9NQX3|GEPH_HUMAN;sp|P51151|RAB9A_HUMAN;sp|Q99523|SORT_HUMAN;sp|P62491|RB11A_HUMAN;sp|Q9UNF0|PACN2_HUMAN;sp|O15498|YKT6_HUMAN;sp|Q5T5C0|STXB5_HUMAN;sp|Q92572|AP3S1_HUMAN;sp|Q9UL25|RAB21_HUMAN;sp|P63027|VAMP2_HUMAN;sp|Q10567|AP1B1_HUMAN;sp|P31946|1433B_HUMAN;sp|P27348…
cellular_component	other organism	10	sp|P0C0L5|CO4B_HUMAN;sp|P17931|LEG3_HUMAN;sp|P04003|C4BPA_HUMAN;sp|P02788|TRFL_HUMAN;sp|P00747|PLMN_HUMAN;sp|Q99816|TS101_HUMAN;sp|Q14974|IMB1_HUMAN;sp|Q8TEM1|PO210_HUMAN;sp|Q96EE3|SEH1_HUMAN;sp|P62826|RAN_HUMAN
cellular_component	other organism part	10	sp|P0C0L5|CO4B_HUMAN;sp|P17931|LEG3_HUMAN;sp|P04003|C4BPA_HUMAN;sp|P02788|TRFL_HUMAN;sp|P00747|PLMN_HUMAN;sp|Q99816|TS101_HUMAN;sp|Q14974|IMB1_HUMAN;sp|Q8TEM1|PO210_HUMAN;sp|Q96EE3|SEH1_HUMAN;sp|P62826|RAN_HUMAN
cellular_component	supramolecular complex	143	sp|Q16658|FSCN1_HUMAN;sp|Q9UM54|MYO6_HUMAN;sp|P67936|TPM4_HUMAN;sp|P21333|FLNA_HUMAN;sp|Q15018|ABRX2_HUMAN;sp|Q96HH9|GRM2B_HUMAN;sp|Q9Y5M8|SRPRB_HUMAN;sp|Q7Z4W1|DCXR_HUMAN;sp|P0DJI8|SAA1_HUMAN;sp|P02511|CRYAB_HUMAN;sp|P06753|TPM3_HUMAN;sp|P05976|MYL1_HUMAN;sp|Q00610|CLH1_HUMAN;sp|P68032|ACTC_HUMAN;sp|P47756|CAPZB_HUMAN;sp|P15311|EZRI_HUMAN;sp|Q8WVV4|POF1B_HUMAN;sp|Q9UBI6|GBG12_HUMAN;sp|Q5T1M5|FKB…
cellular_component	synapse	73	sp|Q9NQX3|GEPH_HUMAN;sp|P62491|RB11A_HUMAN;sp|P20020|AT2B1_HUMAN;sp|P20336|RAB3A_HUMAN;sp|P61020|RAB5B_HUMAN;sp|P51149|RAB7A_HUMAN;sp|O00194|RB27B_HUMAN;sp|O00429|DNM1L_HUMAN;sp|P63027|VAMP2_HUMAN;sp|O43760|SNG2_HUMAN;sp|O43759|SNG1_HUMAN;sp|Q9NSB8|HOME2_HUMAN;sp|P50570|DYN2_HUMAN;sp|Q99720|SGMR1_HUMAN;sp|Q96HC4|PDLI5_HUMAN;sp|Q96CX2|KCD12_HUMAN;sp|P62166|NCS1_HUMAN;sp|Q8IZP0|ABI1_HUMAN;sp|P21964…
cellular_component	synapse part	64	sp|Q9NQX3|GEPH_HUMAN;sp|P62491|RB11A_HUMAN;sp|P20020|AT2B1_HUMAN;sp|P20336|RAB3A_HUMAN;sp|P61020|RAB5B_HUMAN;sp|P51149|RAB7A_HUMAN;sp|O00194|RB27B_HUMAN;sp|O00429|DNM1L_HUMAN;sp|P63027|VAMP2_HUMAN;sp|O43760|SNG2_HUMAN;sp|O43759|SNG1_HUMAN;sp|Q9NSB8|HOME2_HUMAN;sp|P50570|DYN2_HUMAN;sp|Q99720|SGMR1_HUMAN;sp|Q96HC4|PDLI5_HUMAN;sp|Q96CX2|KCD12_HUMAN;sp|P62166|NCS1_HUMAN;sp|Q8IZP0|ABI1_HUMAN;sp|P21964…
cellular_component	virion	15	sp|P07910|HNRPC_HUMAN;sp|P62318|SMD3_HUMAN;sp|P51991|ROA3_HUMAN;sp|P09651|ROA1_HUMAN;sp|P62316|SMD2_HUMAN;sp|Q09666|AHNK_HUMAN;sp|P14678|RSMB_HUMAN;sp|P31942|HNRH3_HUMAN;sp|P10155|RO60_HUMAN;sp|A8MWD9|RUXGL_HUMAN;sp|P62306|RUXF_HUMAN;sp|P62314|SMD1_HUMAN;sp|P55795|HNRH2_HUMAN;sp|P62304|RUXE_HUMAN;sp|P22626|ROA2_HUMAN
cellular_component	virion part	15	sp|P07910|HNRPC_HUMAN;sp|P62318|SMD3_HUMAN;sp|P51991|ROA3_HUMAN;sp|P09651|ROA1_HUMAN;sp|P62316|SMD2_HUMAN;sp|Q09666|AHNK_HUMAN;sp|P14678|RSMB_HUMAN;sp|P31942|HNRH3_HUMAN;sp|P10155|RO60_HUMAN;sp|A8MWD9|RUXGL_HUMAN;sp|P62306|RUXF_HUMAN;sp|P62314|SMD1_HUMAN;sp|P55795|HNRH2_HUMAN;sp|P62304|RUXE_HUMAN;sp|P22626|ROA2_HUMAN
molecular_function	antioxidant activity	31	sp|P04179|SODM_HUMAN;sp|O14618|CCS_HUMAN;sp|P08294|SODE_HUMAN;sp|P00441|SODC_HUMAN;sp|P30044|PRDX5_HUMAN;sp|P32119|PRDX2_HUMAN;sp|Q06830|PRDX1_HUMAN;sp|P30048|PRDX3_HUMAN;sp|Q13162|PRDX4_HUMAN;sp|O43396|TXNL1_HUMAN;sp|P10599|THIO_HUMAN;sp|P62341|SELT_HUMAN;sp|P00390|GSHR_HUMAN;sp|P36969|GPX4_HUMAN;sp|P09211|GSTP1_HUMAN;sp|P07203|GPX1_HUMAN;sp|Q99735|MGST2_HUMAN;sp|P30041|PRDX6_HUMAN;sp|Q99497|PAR…
molecular_function	binding	957	sp|Q04695|K1C17_HUMAN;sp|P18583|SON_HUMAN;sp|P10809|CH60_HUMAN;sp|P62195|PRS8_HUMAN;sp|P15311|EZRI_HUMAN;sp|P20336|RAB3A_HUMAN;sp|P20340|RAB6A_HUMAN;sp|Q9Y487|VPP2_HUMAN;sp|Q8NFQ8|TOIP2_HUMAN;sp|Q92890|UFD1_HUMAN;sp|Q86TM6|SYVN1_HUMAN;sp|P36543|VATE1_HUMAN;sp|Q9UNZ2|NSF1C_HUMAN;sp|P61158|ARP3_HUMAN;sp|P11233|RALA_HUMAN;sp|Q93050|VPP1_HUMAN;sp|O00628|PEX7_HUMAN;sp|P16435|NCPR_HUMAN;sp|P01023|A2MG_…
molecular_function	catalytic activity	615	sp|P10253|LYAG_HUMAN;sp|P16083|NQO2_HUMAN;sp|Q6ZWT7|MBOA2_HUMAN;sp|P27449|VATL_HUMAN;sp|P25705|ATPA_HUMAN;sp|P06576|ATPB_HUMAN;sp|Q15904|VAS1_HUMAN;sp|Q01970|PLCB3_HUMAN;sp|Q13724|MOGS_HUMAN;sp|Q9UBQ7|GRHPR_HUMAN;sp|P00813|ADA_HUMAN;sp|P78527|PRKDC_HUMAN;sp|Q9Y251|HPSE_HUMAN;sp|P08236|BGLR_HUMAN;sp|P45974|UBP5_HUMAN;sp|P09668|CATH_HUMAN;sp|P30101|PDIA3_HUMAN;sp|P25774|CATS_HUMAN;sp|P07339|CATD_HU…
molecular_function	hijacked molecular function	10	sp|P29508|SPB3_HUMAN;sp|P14735|IDE_HUMAN;sp|P08865|RSSA_HUMAN;sp|P08174|DAF_HUMAN;sp|P27487|DPP4_HUMAN;sp|P0DMV8|HS71A_HUMAN;sp|Q14108|SCRB2_HUMAN;sp|O15118|NPC1_HUMAN;sp|Q14118|DAG1_HUMAN;sp|P11279|LAMP1_HUMAN
molecular_function	molecular carrier activity	6	sp|P62826|RAN_HUMAN;sp|P68871|HBB_HUMAN;sp|P69891|HBG1_HUMAN;sp|P69905|HBA_HUMAN;sp|P02042|HBD_HUMAN;sp|O14618|CCS_HUMAN
molecular_function	molecular function regulator	160	sp|P17900|SAP3_HUMAN;sp|Q9UJU6|DBNL_HUMAN;sp|P10619|PPGB_HUMAN;sp|P07602|SAP_HUMAN;sp|Q05655|KPCD_HUMAN;sp|Q6NUJ1|SAPL1_HUMAN;sp|P13010|XRCC5_HUMAN;sp|Q99735|MGST2_HUMAN;sp|P02654|APOC1_HUMAN;sp|P12429|ANXA3_HUMAN;sp|P07355|ANXA2_HUMAN;sp|P08758|ANXA5_HUMAN;sp|P09525|ANXA4_HUMAN;sp|P09668|CATH_HUMAN;sp|Q9ULZ3|ASC_HUMAN;sp|P63244|RACK1_HUMAN;sp|P18510|IL1RA_HUMAN;sp|Q13557|KCC2D_HUMAN;sp|P0DP23|CA…
molecular_function	molecular transducer activity	33	sp|Q99720|SGMR1_HUMAN;sp|P09758|TACD2_HUMAN;sp|O75787|RENR_HUMAN;sp|Q14108|SCRB2_HUMAN;sp|P63244|RACK1_HUMAN;sp|O15118|NPC1_HUMAN;sp|P16144|ITB4_HUMAN;sp|O15455|TLR3_HUMAN;sp|P04264|K2C1_HUMAN;sp|P08865|RSSA_HUMAN;sp|P01833|PIGR_HUMAN;sp|Q99523|SORT_HUMAN;sp|Q9UGM3|DMBT1_HUMAN;sp|P00533|EGFR_HUMAN;sp|O15031|PLXB2_HUMAN;sp|P00734|THRB_HUMAN;sp|O43813|LANC1_HUMAN;sp|P06756|ITAV_HUMAN;sp|P27930|IL1R…
molecular_function	signal transducer activity	44	sp|Q92736|RYR2_HUMAN;sp|Q14573|ITPR3_HUMAN;sp|P00533|EGFR_HUMAN;sp|Q99720|SGMR1_HUMAN;sp|Q8IVH8|M4K3_HUMAN;sp|O00506|STK25_HUMAN;sp|P09601|HMOX1_HUMAN;sp|P62942|FKB1A_HUMAN;sp|P62879|GBB2_HUMAN;sp|P06702|S10A9_HUMAN;sp|P09382|LEG1_HUMAN;sp|Q13835|PKP1_HUMAN;sp|Q9Y3E0|GOT1B_HUMAN;sp|Q9H0E2|TOLIP_HUMAN;sp|Q9UBI6|GBG12_HUMAN;sp|P62873|GBB1_HUMAN;sp|Q8IWA5|CTL2_HUMAN;sp|Q7Z7H5|TMED4_HUMAN;sp|Q16610|E…
molecular_function	structural molecule activity	124	sp|P63220|RS21_HUMAN;sp|P61247|RS3A_HUMAN;sp|P05387|RLA2_HUMAN;sp|P08865|RSSA_HUMAN;sp|P05388|RLA0_HUMAN;sp|P35268|RL22_HUMAN;sp|Q07020|RL18_HUMAN;sp|P23396|RS3_HUMAN;sp|P46782|RS5_HUMAN;sp|P25398|RS12_HUMAN;sp|P08727|K1C19_HUMAN;sp|P60660|MYL6_HUMAN;sp|P06753|TPM3_HUMAN;sp|P05976|MYL1_HUMAN;sp|Q14118|DAG1_HUMAN;sp|P67936|TPM4_HUMAN;sp|Q15149|PLEC_HUMAN;sp|P55884|EIF3B_HUMAN;sp|Q9UHA4|LTOR3_HUMAN…
molecular_function	transcription regulator activity	36	sp|Q96QR8|PURB_HUMAN;sp|P06733|ENOA_HUMAN;sp|P51610|HCFC1_HUMAN;sp|P15408|FOSL2_HUMAN;sp|Q00577|PURA_HUMAN;sp|P14921|ETS1_HUMAN;sp|P28347|TEAD1_HUMAN;sp|P22392|NDKB_HUMAN;sp|Q14134|TRI29_HUMAN;sp|Q9UQ80|PA2G4_HUMAN;sp|Q7KZF4|SND1_HUMAN;sp|Q8N3Y7|RDHE2_HUMAN;sp|P06748|NPM_HUMAN;sp|Q969T9|WBP2_HUMAN;sp|Q15365|PCBP1_HUMAN;sp|P35232|PHB_HUMAN;sp|O43707|ACTN4_HUMAN;sp|Q99816|TS101_HUMAN;sp|Q9BQA1|MEP5…
molecular_function	translation regulator activity	3	sp|Q15365|PCBP1_HUMAN;sp|Q9UKV8|AGO2_HUMAN;sp|Q00577|PURA_HUMAN
molecular_function	transporter activity	98	sp|P27449|VATL_HUMAN;sp|P25705|ATPA_HUMAN;sp|P06576|ATPB_HUMAN;sp|Q15904|VAS1_HUMAN;sp|Q92736|RYR2_HUMAN;sp|Q8NBS3|S4A11_HUMAN;sp|Q14573|ITPR3_HUMAN;sp|P17900|SAP3_HUMAN;sp|P05090|APOD_HUMAN;sp|P04114|APOB_HUMAN;sp|Q86UK0|ABCAC_HUMAN;sp|Q92616|GCN1_HUMAN;sp|P02652|APOA2_HUMAN;sp|O15118|NPC1_HUMAN;sp|P61421|VA0D1_HUMAN;sp|P36543|VATE1_HUMAN;sp|Q9NZD2|GLTP_HUMAN;sp|P16615|AT2A2_HUMAN;sp|Q9BSA9|TM17…
