# Supplementary material for: Quantitative proteomics analysis of young and elderly skin with DIA mass spectrometry reveals new skin aging-related proteins
Source: Aging (Albany NY). 2020 Jun 29;12(13):13529–54. doi: 10.18632/aging.103461 (PMC7377841; doi:10.18632/aging.103461)
Supplement: Supplementary Table 5 [file aging-12-103461-s005..xlsx]

## Sheet: sheet1
Table S5. GO classification of the DEPs
Ontoloty	GO term	Number of Proteins	P value	Protein members
biological_process	positive regulation of multicellular organismal process	21	5.36591e-05	sp|P61769|B2MG_HUMAN,sp|P02679|FIBG_HUMAN,sp|P80108|PHLD_HUMAN,sp|Q16610|ECM1_HUMAN,sp|P07355|ANXA2_HUMAN,sp|P35052|GPC1_HUMAN,sp|P02763|A1AG1_HUMAN,sp|P60953|CDC42_HUMAN,sp|O15296|LX15B_HUMAN,sp|Q14118|DAG1_HUMAN,sp|P02652|APOA2_HUMAN,sp|P00918|CAH2_HUMAN,sp|O75326|SEM7A_HUMAN,sp|O75787|RENR_HUMAN,sp|O43278|SPIT1_HUMAN,sp|P02671|FIBA_HUMAN,sp|P04406|G3P_HUMAN,sp|P02675|FIBB_HUMAN,sp|Q9UL25|RAB21…
biological_process	regulation of substrate adhesion-dependent cell spreading	6	7.70831e-05	sp|P02675|FIBB_HUMAN,sp|P02679|FIBG_HUMAN,sp|P08582|TRFM_HUMAN,sp|P60953|CDC42_HUMAN,sp|P02647|APOA1_HUMAN,sp|P02671|FIBA_HUMAN
biological_process	positive regulation of substrate adhesion-dependent cell spreading	5	8.20637e-05	sp|P02675|FIBB_HUMAN,sp|P02679|FIBG_HUMAN,sp|P60953|CDC42_HUMAN,sp|P02647|APOA1_HUMAN,sp|P02671|FIBA_HUMAN
biological_process	regulation of heterotypic cell-cell adhesion	4	0.000119535	sp|P02675|FIBB_HUMAN,sp|P02679|FIBG_HUMAN,sp|P02647|APOA1_HUMAN,sp|P02671|FIBA_HUMAN
biological_process	positive regulation of cell-substrate adhesion	6	0.000222484	sp|Q14118|DAG1_HUMAN,sp|P02675|FIBB_HUMAN,sp|P02679|FIBG_HUMAN,sp|P60953|CDC42_HUMAN,sp|P02647|APOA1_HUMAN,sp|P02671|FIBA_HUMAN
biological_process	salivary gland development	3	0.000362594	sp|Q14118|DAG1_HUMAN,sp|P01034|CYTC_HUMAN,sp|P60953|CDC42_HUMAN
biological_process	gas transport	3	0.000362594	sp|P00918|CAH2_HUMAN,sp|P68871|HBB_HUMAN,sp|P69905|HBA_HUMAN
biological_process	positive regulation of heterotypic cell-cell adhesion	3	0.000362594	sp|P02675|FIBB_HUMAN,sp|P02679|FIBG_HUMAN,sp|P02671|FIBA_HUMAN
biological_process	exocrine system development	3	0.000362594	sp|Q14118|DAG1_HUMAN,sp|P01034|CYTC_HUMAN,sp|P60953|CDC42_HUMAN
biological_process	positive regulation of vasoconstriction	3	0.000362594	sp|P02675|FIBB_HUMAN,sp|P02679|FIBG_HUMAN,sp|P02671|FIBA_HUMAN
biological_process	negative regulation of endothelial cell apoptotic process	3	0.000362594	sp|P02675|FIBB_HUMAN,sp|P02679|FIBG_HUMAN,sp|P02671|FIBA_HUMAN
biological_process	regulation of protein secretion	10	0.00048986	sp|P02652|APOA2_HUMAN,sp|P02679|FIBG_HUMAN,sp|P80108|PHLD_HUMAN,sp|P02647|APOA1_HUMAN,sp|P02671|FIBA_HUMAN,sp|P04406|G3P_HUMAN,sp|P02675|FIBB_HUMAN,sp|P62834|RAP1A_HUMAN,sp|P02763|A1AG1_HUMAN,sp|O15296|LX15B_HUMAN
biological_process	regulation of cell-substrate adhesion	7	0.000557732	sp|Q14118|DAG1_HUMAN,sp|P02675|FIBB_HUMAN,sp|P02679|FIBG_HUMAN,sp|P08582|TRFM_HUMAN,sp|P60953|CDC42_HUMAN,sp|P02647|APOA1_HUMAN,sp|P02671|FIBA_HUMAN
biological_process	regulation of peptide secretion	10	0.000731745	sp|P02652|APOA2_HUMAN,sp|P02679|FIBG_HUMAN,sp|P80108|PHLD_HUMAN,sp|P02647|APOA1_HUMAN,sp|P02671|FIBA_HUMAN,sp|P04406|G3P_HUMAN,sp|P02675|FIBB_HUMAN,sp|P62834|RAP1A_HUMAN,sp|P02763|A1AG1_HUMAN,sp|O15296|LX15B_HUMAN
biological_process	bicarbonate transport	4	0.000747121	sp|P00918|CAH2_HUMAN,sp|P68871|HBB_HUMAN,sp|P23280|CAH6_HUMAN,sp|P69905|HBA_HUMAN
biological_process	positive regulation of receptor-mediated endocytosis	4	0.000747121	sp|P07355|ANXA2_HUMAN,sp|P61769|B2MG_HUMAN,sp|Q9UL25|RAB21_HUMAN,sp|P10909|CLUS_HUMAN
biological_process	positive regulation of cytokine production	8	0.000833087	sp|P61769|B2MG_HUMAN,sp|P02652|APOA2_HUMAN,sp|O75326|SEM7A_HUMAN,sp|O75787|RENR_HUMAN,sp|P04406|G3P_HUMAN,sp|P02763|A1AG1_HUMAN,sp|O15296|LX15B_HUMAN,sp|P10909|CLUS_HUMAN
biological_process	platelet aggregation	5	0.000919311	sp|P35579|MYH9_HUMAN,sp|P02675|FIBB_HUMAN,sp|P02679|FIBG_HUMAN,sp|P68871|HBB_HUMAN,sp|P02671|FIBA_HUMAN
biological_process	platelet degranulation	9	0.00122209	sp|Q9UEU0|VTI1B_HUMAN,sp|P01011|AACT_HUMAN,sp|P02679|FIBG_HUMAN,sp|Q16610|ECM1_HUMAN,sp|P01023|A2MG_HUMAN,sp|P02671|FIBA_HUMAN,sp|P02675|FIBB_HUMAN,sp|Q08380|LG3BP_HUMAN,sp|P02763|A1AG1_HUMAN
biological_process	positive regulation of cell morphogenesis involved in differentiation	7	0.00131389	sp|P02675|FIBB_HUMAN,sp|P02679|FIBG_HUMAN,sp|Q9UL25|RAB21_HUMAN,sp|O75326|SEM7A_HUMAN,sp|P60953|CDC42_HUMAN,sp|P02647|APOA1_HUMAN,sp|P02671|FIBA_HUMAN
biological_process	positive regulation of protein secretion	7	0.00131389	sp|P04406|G3P_HUMAN,sp|P02675|FIBB_HUMAN,sp|P02679|FIBG_HUMAN,sp|P80108|PHLD_HUMAN,sp|P02763|A1AG1_HUMAN,sp|P02671|FIBA_HUMAN,sp|O15296|LX15B_HUMAN
biological_process	regulation of vasoconstriction	3	0.00137447	sp|P02675|FIBB_HUMAN,sp|P02679|FIBG_HUMAN,sp|P02671|FIBA_HUMAN
biological_process	blood vessel endothelial cell migration	3	0.00137447	sp|P35579|MYH9_HUMAN,sp|P80108|PHLD_HUMAN,sp|P02647|APOA1_HUMAN
biological_process	positive regulation of neuron death	3	0.00137447	sp|O95831|AIFM1_HUMAN,sp|P60953|CDC42_HUMAN,sp|P10909|CLUS_HUMAN
biological_process	regulation of endothelial cell apoptotic process	3	0.00137447	sp|P02675|FIBB_HUMAN,sp|P02679|FIBG_HUMAN,sp|P02671|FIBA_HUMAN
biological_process	regulation of cytokine production involved in immune response	4	0.00141218	sp|P61769|B2MG_HUMAN,sp|P02652|APOA2_HUMAN,sp|O75326|SEM7A_HUMAN,sp|P02647|APOA1_HUMAN
biological_process	regulation of multicellular organismal process	29	0.00153566	sp|P61769|B2MG_HUMAN,sp|Q99436|PSB7_HUMAN,sp|P02679|FIBG_HUMAN,sp|P80108|PHLD_HUMAN,sp|Q16610|ECM1_HUMAN,sp|P02647|APOA1_HUMAN,sp|P07355|ANXA2_HUMAN,sp|P28066|PSA5_HUMAN,sp|P35052|GPC1_HUMAN,sp|P02763|A1AG1_HUMAN,sp|P60953|CDC42_HUMAN,sp|O15296|LX15B_HUMAN,sp|Q9UL18|AGO1_HUMAN,sp|Q14118|DAG1_HUMAN,sp|P02652|APOA2_HUMAN,sp|P01034|CYTC_HUMAN,sp|P00918|CAH2_HUMAN,sp|O75326|SEM7A_HUMAN,sp|O75787|RENR…
biological_process	angiogenesis	7	0.00169371	sp|P35579|MYH9_HUMAN,sp|P07355|ANXA2_HUMAN,sp|Q14118|DAG1_HUMAN,sp|P80108|PHLD_HUMAN,sp|Q16610|ECM1_HUMAN,sp|Q9UHW9|S12A6_HUMAN,sp|P60953|CDC42_HUMAN
biological_process	positive regulation of cell differentiation	13	0.00181156	sp|Q14118|DAG1_HUMAN,sp|P00918|CAH2_HUMAN,sp|P02679|FIBG_HUMAN,sp|O75326|SEM7A_HUMAN,sp|O43278|SPIT1_HUMAN,sp|P02647|APOA1_HUMAN,sp|P02671|FIBA_HUMAN,sp|P02675|FIBB_HUMAN,sp|P35052|GPC1_HUMAN,sp|Q9UL25|RAB21_HUMAN,sp|P62834|RAP1A_HUMAN,sp|O15296|LX15B_HUMAN,sp|P60953|CDC42_HUMAN
biological_process	positive regulation of cellular metabolic process	26	0.0020571	sp|Q99436|PSB7_HUMAN,sp|P02679|FIBG_HUMAN,sp|P80108|PHLD_HUMAN,sp|P02647|APOA1_HUMAN,sp|P07355|ANXA2_HUMAN,sp|P46736|BRCC3_HUMAN,sp|P28066|PSA5_HUMAN,sp|P55072|TERA_HUMAN,sp|P50990|TCPQ_HUMAN,sp|P08582|TRFM_HUMAN,sp|P60953|CDC42_HUMAN,sp|P35579|MYH9_HUMAN,sp|Q9UL18|AGO1_HUMAN,sp|Q14118|DAG1_HUMAN,sp|P02652|APOA2_HUMAN,sp|P01034|CYTC_HUMAN,sp|O75326|SEM7A_HUMAN,sp|P61604|CH10_HUMAN,sp|P02671|FIBA_…
biological_process	positive regulation of cell development	10	0.00210593	sp|Q14118|DAG1_HUMAN,sp|P02679|FIBG_HUMAN,sp|O75326|SEM7A_HUMAN,sp|O43278|SPIT1_HUMAN,sp|P02647|APOA1_HUMAN,sp|P02671|FIBA_HUMAN,sp|P02675|FIBB_HUMAN,sp|Q9UL25|RAB21_HUMAN,sp|P62834|RAP1A_HUMAN,sp|P60953|CDC42_HUMAN
biological_process	positive regulation of peptide secretion	7	0.00215401	sp|P04406|G3P_HUMAN,sp|P02675|FIBB_HUMAN,sp|P02679|FIBG_HUMAN,sp|P80108|PHLD_HUMAN,sp|P02763|A1AG1_HUMAN,sp|P02671|FIBA_HUMAN,sp|O15296|LX15B_HUMAN
biological_process	regulation of cell morphogenesis	10	0.00246556	sp|P35579|MYH9_HUMAN,sp|Q14118|DAG1_HUMAN,sp|P02679|FIBG_HUMAN,sp|O75326|SEM7A_HUMAN,sp|P02647|APOA1_HUMAN,sp|P02671|FIBA_HUMAN,sp|P02675|FIBB_HUMAN,sp|Q9UL25|RAB21_HUMAN,sp|P08582|TRFM_HUMAN,sp|P60953|CDC42_HUMAN
biological_process	regulation of cell morphogenesis involved in differentiation	8	0.00247976	sp|P02679|FIBG_HUMAN,sp|O75326|SEM7A_HUMAN,sp|P02647|APOA1_HUMAN,sp|P02671|FIBA_HUMAN,sp|P02675|FIBB_HUMAN,sp|Q9UL25|RAB21_HUMAN,sp|P08582|TRFM_HUMAN,sp|P60953|CDC42_HUMAN
biological_process	positive regulation of nitrogen compound metabolic process	25	0.00260129	sp|Q99436|PSB7_HUMAN,sp|P02679|FIBG_HUMAN,sp|P80108|PHLD_HUMAN,sp|P07355|ANXA2_HUMAN,sp|P46736|BRCC3_HUMAN,sp|P28066|PSA5_HUMAN,sp|P55072|TERA_HUMAN,sp|P50990|TCPQ_HUMAN,sp|P08582|TRFM_HUMAN,sp|P60953|CDC42_HUMAN,sp|P35579|MYH9_HUMAN,sp|Q9UL18|AGO1_HUMAN,sp|Q14118|DAG1_HUMAN,sp|P02652|APOA2_HUMAN,sp|P01034|CYTC_HUMAN,sp|O75326|SEM7A_HUMAN,sp|P61604|CH10_HUMAN,sp|P02671|FIBA_HUMAN,sp|P02545|LMNA_H…
biological_process	regulation of anatomical structure morphogenesis	17	0.00269508	sp|Q99436|PSB7_HUMAN,sp|P02679|FIBG_HUMAN,sp|Q16610|ECM1_HUMAN,sp|P02647|APOA1_HUMAN,sp|P28066|PSA5_HUMAN,sp|Q99536|VAT1_HUMAN,sp|P08582|TRFM_HUMAN,sp|P60953|CDC42_HUMAN,sp|P35579|MYH9_HUMAN,sp|P01034|CYTC_HUMAN,sp|Q14118|DAG1_HUMAN,sp|O75326|SEM7A_HUMAN,sp|Q96CW1|AP2M1_HUMAN,sp|P02671|FIBA_HUMAN,sp|P02675|FIBB_HUMAN,sp|Q9UL25|RAB21_HUMAN,sp|P62834|RAP1A_HUMAN
biological_process	response to stress	36	0.00281639	sp|Q15018|ABRX2_HUMAN,sp|Q99436|PSB7_HUMAN,sp|O75874|IDHC_HUMAN,sp|P02763|A1AG1_HUMAN,sp|P35579|MYH9_HUMAN,sp|P02652|APOA2_HUMAN,sp|P01034|CYTC_HUMAN,sp|P01011|AACT_HUMAN,sp|O75326|SEM7A_HUMAN,sp|P0C869|PA24B_HUMAN,sp|P02671|FIBA_HUMAN,sp|P02545|LMNA_HUMAN,sp|P00738|HPT_HUMAN,sp|P04406|G3P_HUMAN,sp|Q08380|LG3BP_HUMAN,sp|P81605|DCD_HUMAN,sp|P68871|HBB_HUMAN,sp|Q9UHW9|S12A6_HUMAN,sp|P69905|HBA_HUMA…
biological_process	acute inflammatory response	5	0.00292885	sp|P00738|HPT_HUMAN,sp|P02652|APOA2_HUMAN,sp|P01011|AACT_HUMAN,sp|P01008|ANT3_HUMAN,sp|P02763|A1AG1_HUMAN
biological_process	positive regulation of endocytosis	5	0.00292885	sp|P07355|ANXA2_HUMAN,sp|P61769|B2MG_HUMAN,sp|Q9UL25|RAB21_HUMAN,sp|P62834|RAP1A_HUMAN,sp|P10909|CLUS_HUMAN
biological_process	phosphatidylcholine metabolic process	5	0.00292885	sp|Q3MJ16|PA24E_HUMAN,sp|P02652|APOA2_HUMAN,sp|P80108|PHLD_HUMAN,sp|P0C869|PA24B_HUMAN,sp|P02647|APOA1_HUMAN
biological_process	positive regulation of cellular component organization	17	0.00296404	sp|P61769|B2MG_HUMAN,sp|Q99436|PSB7_HUMAN,sp|P02679|FIBG_HUMAN,sp|P50552|VASP_HUMAN,sp|P02647|APOA1_HUMAN,sp|P07355|ANXA2_HUMAN,sp|P55072|TERA_HUMAN,sp|P50990|TCPQ_HUMAN,sp|P08582|TRFM_HUMAN,sp|P60953|CDC42_HUMAN,sp|Q14118|DAG1_HUMAN,sp|O75326|SEM7A_HUMAN,sp|P02671|FIBA_HUMAN,sp|P02675|FIBB_HUMAN,sp|Q9UL25|RAB21_HUMAN,sp|P62834|RAP1A_HUMAN,sp|P10909|CLUS_HUMAN
biological_process	regulation of protein localization	16	0.00297625	sp|Q9UEU0|VTI1B_HUMAN,sp|P02652|APOA2_HUMAN,sp|Q99436|PSB7_HUMAN,sp|P02679|FIBG_HUMAN,sp|P80108|PHLD_HUMAN,sp|Q96CW1|AP2M1_HUMAN,sp|P02647|APOA1_HUMAN,sp|P02545|LMNA_HUMAN,sp|P02671|FIBA_HUMAN,sp|P04406|G3P_HUMAN,sp|P02675|FIBB_HUMAN,sp|P02763|A1AG1_HUMAN,sp|P62834|RAP1A_HUMAN,sp|P50990|TCPQ_HUMAN,sp|O15296|LX15B_HUMAN,sp|P60953|CDC42_HUMAN
biological_process	regulation of developmental process	25	0.00300429	sp|P61769|B2MG_HUMAN,sp|Q99436|PSB7_HUMAN,sp|P02679|FIBG_HUMAN,sp|Q16610|ECM1_HUMAN,sp|P02647|APOA1_HUMAN,sp|P07355|ANXA2_HUMAN,sp|P28066|PSA5_HUMAN,sp|Q99536|VAT1_HUMAN,sp|P35052|GPC1_HUMAN,sp|P08582|TRFM_HUMAN,sp|P60953|CDC42_HUMAN,sp|O15296|LX15B_HUMAN,sp|Q9UL18|AGO1_HUMAN,sp|P35579|MYH9_HUMAN,sp|Q14118|DAG1_HUMAN,sp|P01034|CYTC_HUMAN,sp|P00918|CAH2_HUMAN,sp|O75326|SEM7A_HUMAN,sp|Q96CW1|AP2M1_…
biological_process	positive regulation of blood circulation	3	0.00325686	sp|P02675|FIBB_HUMAN,sp|P02679|FIBG_HUMAN,sp|P02671|FIBA_HUMAN
biological_process	regulation of cell development	12	0.00344159	sp|Q14118|DAG1_HUMAN,sp|P61769|B2MG_HUMAN,sp|P02679|FIBG_HUMAN,sp|O75326|SEM7A_HUMAN,sp|O43278|SPIT1_HUMAN,sp|P02647|APOA1_HUMAN,sp|P02671|FIBA_HUMAN,sp|P02675|FIBB_HUMAN,sp|Q9UL25|RAB21_HUMAN,sp|P62834|RAP1A_HUMAN,sp|P08582|TRFM_HUMAN,sp|P60953|CDC42_HUMAN
biological_process	positive regulation of cellular process	40	0.00348466	sp|Q99436|PSB7_HUMAN,sp|P80108|PHLD_HUMAN,sp|P07355|ANXA2_HUMAN,sp|P35052|GPC1_HUMAN,sp|P02763|A1AG1_HUMAN,sp|P08582|TRFM_HUMAN,sp|O15296|LX15B_HUMAN,sp|P35579|MYH9_HUMAN,sp|P02652|APOA2_HUMAN,sp|P01034|CYTC_HUMAN,sp|O75326|SEM7A_HUMAN,sp|O75787|RENR_HUMAN,sp|P02671|FIBA_HUMAN,sp|P02545|LMNA_HUMAN,sp|P00738|HPT_HUMAN,sp|P04406|G3P_HUMAN,sp|P62834|RAP1A_HUMAN,sp|P68871|HBB_HUMAN,sp|P69905|HBA_HUMA…
biological_process	inflammatory response	9	0.00355659	sp|P02652|APOA2_HUMAN,sp|P01011|AACT_HUMAN,sp|O75326|SEM7A_HUMAN,sp|P01008|ANT3_HUMAN,sp|Q16610|ECM1_HUMAN,sp|P0C869|PA24B_HUMAN,sp|O00161|SNP23_HUMAN,sp|P00738|HPT_HUMAN,sp|P02763|A1AG1_HUMAN
biological_process	positive regulation of developmental process	15	0.00360157	sp|Q14118|DAG1_HUMAN,sp|P00918|CAH2_HUMAN,sp|P02679|FIBG_HUMAN,sp|O75326|SEM7A_HUMAN,sp|Q16610|ECM1_HUMAN,sp|O43278|SPIT1_HUMAN,sp|P02647|APOA1_HUMAN,sp|P02545|LMNA_HUMAN,sp|P02671|FIBA_HUMAN,sp|P02675|FIBB_HUMAN,sp|Q9UL25|RAB21_HUMAN,sp|P35052|GPC1_HUMAN,sp|P62834|RAP1A_HUMAN,sp|P60953|CDC42_HUMAN,sp|O15296|LX15B_HUMAN
biological_process	blood vessel development	8	0.00360718	sp|P35579|MYH9_HUMAN,sp|Q14118|DAG1_HUMAN,sp|P80108|PHLD_HUMAN,sp|Q16610|ECM1_HUMAN,sp|O43278|SPIT1_HUMAN,sp|P07355|ANXA2_HUMAN,sp|Q9UHW9|S12A6_HUMAN,sp|P60953|CDC42_HUMAN
biological_process	vasculature development	8	0.00360718	sp|P35579|MYH9_HUMAN,sp|Q14118|DAG1_HUMAN,sp|P80108|PHLD_HUMAN,sp|Q16610|ECM1_HUMAN,sp|O43278|SPIT1_HUMAN,sp|P07355|ANXA2_HUMAN,sp|Q9UHW9|S12A6_HUMAN,sp|P60953|CDC42_HUMAN
biological_process	cardiovascular system development	8	0.00360718	sp|P35579|MYH9_HUMAN,sp|Q14118|DAG1_HUMAN,sp|P80108|PHLD_HUMAN,sp|Q16610|ECM1_HUMAN,sp|O43278|SPIT1_HUMAN,sp|P07355|ANXA2_HUMAN,sp|Q9UHW9|S12A6_HUMAN,sp|P60953|CDC42_HUMAN
biological_process	fibrinolysis	4	0.00378523	sp|P07355|ANXA2_HUMAN,sp|P02675|FIBB_HUMAN,sp|P02679|FIBG_HUMAN,sp|P02671|FIBA_HUMAN
biological_process	regulation of receptor-mediated endocytosis	4	0.00378523	sp|P07355|ANXA2_HUMAN,sp|P61769|B2MG_HUMAN,sp|Q9UL25|RAB21_HUMAN,sp|P10909|CLUS_HUMAN
biological_process	blood coagulation, fibrin clot formation	4	0.00378523	sp|P02675|FIBB_HUMAN,sp|P02679|FIBG_HUMAN,sp|P01023|A2MG_HUMAN,sp|P02671|FIBA_HUMAN
biological_process	circulatory system development	10	0.00385024	sp|P35579|MYH9_HUMAN,sp|Q14118|DAG1_HUMAN,sp|P80108|PHLD_HUMAN,sp|Q16610|ECM1_HUMAN,sp|O43278|SPIT1_HUMAN,sp|P02545|LMNA_HUMAN,sp|P07355|ANXA2_HUMAN,sp|P16870|CBPE_HUMAN,sp|Q9UHW9|S12A6_HUMAN,sp|P60953|CDC42_HUMAN
biological_process	homotypic cell-cell adhesion	5	0.00402061	sp|P35579|MYH9_HUMAN,sp|P02675|FIBB_HUMAN,sp|P02679|FIBG_HUMAN,sp|P68871|HBB_HUMAN,sp|P02671|FIBA_HUMAN
biological_process	blood vessel morphogenesis	7	0.0041292	sp|P35579|MYH9_HUMAN,sp|P07355|ANXA2_HUMAN,sp|Q14118|DAG1_HUMAN,sp|P80108|PHLD_HUMAN,sp|Q16610|ECM1_HUMAN,sp|Q9UHW9|S12A6_HUMAN,sp|P60953|CDC42_HUMAN
biological_process	regulation of protein metabolic process	28	0.00435061	sp|Q99436|PSB7_HUMAN,sp|P02679|FIBG_HUMAN,sp|P80108|PHLD_HUMAN,sp|Q16610|ECM1_HUMAN,sp|P01040|CYTA_HUMAN,sp|P02647|APOA1_HUMAN,sp|P07355|ANXA2_HUMAN,sp|P28066|PSA5_HUMAN,sp|P55072|TERA_HUMAN,sp|P08582|TRFM_HUMAN,sp|P60953|CDC42_HUMAN,sp|P35579|MYH9_HUMAN,sp|Q9UL18|AGO1_HUMAN,sp|Q14118|DAG1_HUMAN,sp|P02652|APOA2_HUMAN,sp|P01034|CYTC_HUMAN,sp|O75326|SEM7A_HUMAN,sp|O75787|RENR_HUMAN,sp|P01008|ANT3_H…
biological_process	regulation of peptide transport	13	0.00465563	sp|P02652|APOA2_HUMAN,sp|Q99436|PSB7_HUMAN,sp|P00918|CAH2_HUMAN,sp|P02679|FIBG_HUMAN,sp|P80108|PHLD_HUMAN,sp|P02647|APOA1_HUMAN,sp|P02671|FIBA_HUMAN,sp|P04406|G3P_HUMAN,sp|P02675|FIBB_HUMAN,sp|P02763|A1AG1_HUMAN,sp|P62834|RAP1A_HUMAN,sp|O15296|LX15B_HUMAN,sp|P60953|CDC42_HUMAN
biological_process	positive regulation of transport	15	0.00483787	sp|P61769|B2MG_HUMAN,sp|Q99436|PSB7_HUMAN,sp|P00918|CAH2_HUMAN,sp|P02679|FIBG_HUMAN,sp|P80108|PHLD_HUMAN,sp|P02671|FIBA_HUMAN,sp|P07355|ANXA2_HUMAN,sp|P04406|G3P_HUMAN,sp|P02675|FIBB_HUMAN,sp|Q9UL25|RAB21_HUMAN,sp|P02763|A1AG1_HUMAN,sp|P62834|RAP1A_HUMAN,sp|O15296|LX15B_HUMAN,sp|P10909|CLUS_HUMAN,sp|P60953|CDC42_HUMAN
biological_process	regulation of cellular protein metabolic process	26	0.00502707	sp|Q99436|PSB7_HUMAN,sp|P02679|FIBG_HUMAN,sp|P80108|PHLD_HUMAN,sp|Q16610|ECM1_HUMAN,sp|P01040|CYTA_HUMAN,sp|P02647|APOA1_HUMAN,sp|P07355|ANXA2_HUMAN,sp|P28066|PSA5_HUMAN,sp|P55072|TERA_HUMAN,sp|P08582|TRFM_HUMAN,sp|P60953|CDC42_HUMAN,sp|P35579|MYH9_HUMAN,sp|Q9UL18|AGO1_HUMAN,sp|Q14118|DAG1_HUMAN,sp|P01034|CYTC_HUMAN,sp|O75326|SEM7A_HUMAN,sp|O75787|RENR_HUMAN,sp|P01023|A2MG_HUMAN,sp|P61604|CH10_HU…
biological_process	anatomical structure formation involved in morphogenesis	10	0.00507529	sp|P35579|MYH9_HUMAN,sp|Q14118|DAG1_HUMAN,sp|P80108|PHLD_HUMAN,sp|Q16610|ECM1_HUMAN,sp|O43278|SPIT1_HUMAN,sp|P50552|VASP_HUMAN,sp|P07355|ANXA2_HUMAN,sp|P35052|GPC1_HUMAN,sp|Q9UHW9|S12A6_HUMAN,sp|P60953|CDC42_HUMAN
biological_process	regulation of cytokine secretion involved in immune response	2	0.00513957	sp|P02652|APOA2_HUMAN,sp|P02647|APOA1_HUMAN
biological_process	negative regulation of cytokine secretion involved in immune response	2	0.00513957	sp|P02652|APOA2_HUMAN,sp|P02647|APOA1_HUMAN
biological_process	histidyl-tRNA aminoacylation	2	0.00513957	sp|P49590|SYHM_HUMAN,sp|P12081|SYHC_HUMAN
biological_process	salivary gland morphogenesis	2	0.00513957	sp|Q14118|DAG1_HUMAN,sp|P60953|CDC42_HUMAN
biological_process	negative regulation of collagen metabolic process	2	0.00513957	sp|P01034|CYTC_HUMAN,sp|P62834|RAP1A_HUMAN
biological_process	regulation of very-low-density lipoprotein particle remodeling	2	0.00513957	sp|P02652|APOA2_HUMAN,sp|P02647|APOA1_HUMAN
biological_process	negative regulation of very-low-density lipoprotein particle remodeling	2	0.00513957	sp|P02652|APOA2_HUMAN,sp|P02647|APOA1_HUMAN
biological_process	positive regulation of lipoprotein particle clearance	2	0.00513957	sp|P07355|ANXA2_HUMAN,sp|P80108|PHLD_HUMAN
biological_process	oxygen transport	2	0.00513957	sp|P68871|HBB_HUMAN,sp|P69905|HBA_HUMAN
biological_process	negative regulation of multicellular organismal metabolic process	2	0.00513957	sp|P01034|CYTC_HUMAN,sp|P62834|RAP1A_HUMAN
biological_process	positive regulation of DNA replication	2	0.00513957	sp|P01034|CYTC_HUMAN,sp|P60953|CDC42_HUMAN
biological_process	vitamin transport	2	0.00513957	sp|P02774|VTDB_HUMAN,sp|P02647|APOA1_HUMAN
biological_process	regulation of receptor binding	2	0.00513957	sp|P07355|ANXA2_HUMAN,sp|P61769|B2MG_HUMAN
biological_process	positive regulation of receptor binding	2	0.00513957	sp|P07355|ANXA2_HUMAN,sp|P61769|B2MG_HUMAN
biological_process	positive regulation of metabolic process	27	0.00515224	sp|Q99436|PSB7_HUMAN,sp|P02679|FIBG_HUMAN,sp|P80108|PHLD_HUMAN,sp|P12273|PIP_HUMAN,sp|P02647|APOA1_HUMAN,sp|P07355|ANXA2_HUMAN,sp|P46736|BRCC3_HUMAN,sp|P28066|PSA5_HUMAN,sp|P55072|TERA_HUMAN,sp|P50990|TCPQ_HUMAN,sp|P08582|TRFM_HUMAN,sp|P60953|CDC42_HUMAN,sp|P35579|MYH9_HUMAN,sp|Q9UL18|AGO1_HUMAN,sp|Q14118|DAG1_HUMAN,sp|P02652|APOA2_HUMAN,sp|P01034|CYTC_HUMAN,sp|O75326|SEM7A_HUMAN,sp|P61604|CH10_H…
biological_process	regulation of secretion by cell	11	0.00573053	sp|P02652|APOA2_HUMAN,sp|P02679|FIBG_HUMAN,sp|P80108|PHLD_HUMAN,sp|P02647|APOA1_HUMAN,sp|P02671|FIBA_HUMAN,sp|P04406|G3P_HUMAN,sp|P02675|FIBB_HUMAN,sp|Q9UL25|RAB21_HUMAN,sp|P02763|A1AG1_HUMAN,sp|P62834|RAP1A_HUMAN,sp|O15296|LX15B_HUMAN
biological_process	extracellular matrix organization	7	0.00606058	sp|P07355|ANXA2_HUMAN,sp|Q14118|DAG1_HUMAN,sp|P02675|FIBB_HUMAN,sp|P02679|FIBG_HUMAN,sp|P01023|A2MG_HUMAN,sp|O43278|SPIT1_HUMAN,sp|P02671|FIBA_HUMAN
biological_process	extracellular structure organization	7	0.00606058	sp|P07355|ANXA2_HUMAN,sp|Q14118|DAG1_HUMAN,sp|P02675|FIBB_HUMAN,sp|P02679|FIBG_HUMAN,sp|P01023|A2MG_HUMAN,sp|O43278|SPIT1_HUMAN,sp|P02671|FIBA_HUMAN
biological_process	plasminogen activation	3	0.00617488	sp|P02675|FIBB_HUMAN,sp|P02679|FIBG_HUMAN,sp|P02671|FIBA_HUMAN
biological_process	endothelial cell migration	3	0.00617488	sp|P35579|MYH9_HUMAN,sp|P80108|PHLD_HUMAN,sp|P02647|APOA1_HUMAN
biological_process	negative regulation of extrinsic apoptotic signaling pathway via death domain receptors	3	0.00617488	sp|P02675|FIBB_HUMAN,sp|P02679|FIBG_HUMAN,sp|P02671|FIBA_HUMAN
biological_process	negative regulation of epithelial cell apoptotic process	3	0.00617488	sp|P02675|FIBB_HUMAN,sp|P02679|FIBG_HUMAN,sp|P02671|FIBA_HUMAN
biological_process	platelet activation	5	0.00702629	sp|P35579|MYH9_HUMAN,sp|P02675|FIBB_HUMAN,sp|P02679|FIBG_HUMAN,sp|P68871|HBB_HUMAN,sp|P02671|FIBA_HUMAN
biological_process	positive regulation of ERK1 and ERK2 cascade	5	0.00702629	sp|P02675|FIBB_HUMAN,sp|P02679|FIBG_HUMAN,sp|O75326|SEM7A_HUMAN,sp|P62834|RAP1A_HUMAN,sp|P02671|FIBA_HUMAN
biological_process	microtubule-based process	9	0.00743668	sp|P35579|MYH9_HUMAN,sp|Q14118|DAG1_HUMAN,sp|Q15018|ABRX2_HUMAN,sp|Q96CW1|AP2M1_HUMAN,sp|P02545|LMNA_HUMAN,sp|P04406|G3P_HUMAN,sp|Q9UL25|RAB21_HUMAN,sp|P60953|CDC42_HUMAN,sp|Q9HC35|EMAL4_HUMAN
biological_process	regulation of establishment of protein localization	13	0.00779693	sp|P02652|APOA2_HUMAN,sp|Q99436|PSB7_HUMAN,sp|P02679|FIBG_HUMAN,sp|P80108|PHLD_HUMAN,sp|P02647|APOA1_HUMAN,sp|P02671|FIBA_HUMAN,sp|P04406|G3P_HUMAN,sp|P02675|FIBB_HUMAN,sp|P02763|A1AG1_HUMAN,sp|P62834|RAP1A_HUMAN,sp|P50990|TCPQ_HUMAN,sp|O15296|LX15B_HUMAN,sp|P60953|CDC42_HUMAN
biological_process	positive regulation of hormone secretion	4	0.00797547	sp|P02675|FIBB_HUMAN,sp|P02679|FIBG_HUMAN,sp|P80108|PHLD_HUMAN,sp|P02671|FIBA_HUMAN
biological_process	positive regulation of peptide hormone secretion	4	0.00797547	sp|P02675|FIBB_HUMAN,sp|P02679|FIBG_HUMAN,sp|P80108|PHLD_HUMAN,sp|P02671|FIBA_HUMAN
biological_process	ammonium ion metabolic process	6	0.00840167	sp|Q3MJ16|PA24E_HUMAN,sp|P02652|APOA2_HUMAN,sp|P80108|PHLD_HUMAN,sp|P0C869|PA24B_HUMAN,sp|P00492|HPRT_HUMAN,sp|P02647|APOA1_HUMAN
biological_process	positive regulation of establishment of protein localization	10	0.00843508	sp|Q99436|PSB7_HUMAN,sp|P02679|FIBG_HUMAN,sp|P80108|PHLD_HUMAN,sp|P02671|FIBA_HUMAN,sp|P04406|G3P_HUMAN,sp|P02675|FIBB_HUMAN,sp|P02763|A1AG1_HUMAN,sp|P50990|TCPQ_HUMAN,sp|O15296|LX15B_HUMAN,sp|P60953|CDC42_HUMAN
biological_process	response to stimulus	61	0.00848366	sp|Q15018|ABRX2_HUMAN,sp|Q99436|PSB7_HUMAN,sp|P80108|PHLD_HUMAN,sp|P12273|PIP_HUMAN,sp|P07355|ANXA2_HUMAN,sp|O75874|IDHC_HUMAN,sp|P35052|GPC1_HUMAN,sp|P02763|A1AG1_HUMAN,sp|P30740|ILEU_HUMAN,sp|P35579|MYH9_HUMAN,sp|P02652|APOA2_HUMAN,sp|P01034|CYTC_HUMAN,sp|P01011|AACT_HUMAN,sp|O75326|SEM7A_HUMAN,sp|P0C869|PA24B_HUMAN,sp|O75787|RENR_HUMAN,sp|P02671|FIBA_HUMAN,sp|P02545|LMNA_HUMAN,sp|P04406|G3P_HU…
biological_process	regulation of blood coagulation	5	0.00900168	sp|P07355|ANXA2_HUMAN,sp|P02675|FIBB_HUMAN,sp|P02679|FIBG_HUMAN,sp|P01008|ANT3_HUMAN,sp|P02671|FIBA_HUMAN
biological_process	regulation of cytokine secretion	5	0.00900168	sp|P04406|G3P_HUMAN,sp|P02652|APOA2_HUMAN,sp|P02763|A1AG1_HUMAN,sp|P02647|APOA1_HUMAN,sp|O15296|LX15B_HUMAN
biological_process	regulation of peptide hormone secretion	5	0.00900168	sp|P02675|FIBB_HUMAN,sp|P02679|FIBG_HUMAN,sp|P80108|PHLD_HUMAN,sp|P62834|RAP1A_HUMAN,sp|P02671|FIBA_HUMAN
biological_process	regulation of hemostasis	5	0.00900168	sp|P07355|ANXA2_HUMAN,sp|P02675|FIBB_HUMAN,sp|P02679|FIBG_HUMAN,sp|P01008|ANT3_HUMAN,sp|P02671|FIBA_HUMAN
biological_process	positive regulation of biological process	42	0.00903797	sp|Q99436|PSB7_HUMAN,sp|P80108|PHLD_HUMAN,sp|P12273|PIP_HUMAN,sp|P07355|ANXA2_HUMAN,sp|P35052|GPC1_HUMAN,sp|P02763|A1AG1_HUMAN,sp|P08582|TRFM_HUMAN,sp|O15296|LX15B_HUMAN,sp|P35579|MYH9_HUMAN,sp|P02652|APOA2_HUMAN,sp|P01034|CYTC_HUMAN,sp|O75326|SEM7A_HUMAN,sp|O75787|RENR_HUMAN,sp|P02671|FIBA_HUMAN,sp|P02545|LMNA_HUMAN,sp|P00738|HPT_HUMAN,sp|P04406|G3P_HUMAN,sp|P62834|RAP1A_HUMAN,sp|P68871|HBB_HUMA…
biological_process	regulation of protein transport	12	0.00937237	sp|P02652|APOA2_HUMAN,sp|Q99436|PSB7_HUMAN,sp|P02679|FIBG_HUMAN,sp|P80108|PHLD_HUMAN,sp|P02647|APOA1_HUMAN,sp|P02671|FIBA_HUMAN,sp|P04406|G3P_HUMAN,sp|P02675|FIBB_HUMAN,sp|P02763|A1AG1_HUMAN,sp|P62834|RAP1A_HUMAN,sp|O15296|LX15B_HUMAN,sp|P60953|CDC42_HUMAN
biological_process	positive regulation of protein transport	9	0.00968004	sp|Q99436|PSB7_HUMAN,sp|P02679|FIBG_HUMAN,sp|P80108|PHLD_HUMAN,sp|P02671|FIBA_HUMAN,sp|P04406|G3P_HUMAN,sp|P02675|FIBB_HUMAN,sp|P02763|A1AG1_HUMAN,sp|O15296|LX15B_HUMAN,sp|P60953|CDC42_HUMAN
biological_process	regulation of immune system process	18	0.00989174	sp|P61769|B2MG_HUMAN,sp|Q99436|PSB7_HUMAN,sp|P02679|FIBG_HUMAN,sp|P80108|PHLD_HUMAN,sp|Q16610|ECM1_HUMAN,sp|P12273|PIP_HUMAN,sp|P02647|APOA1_HUMAN,sp|P28066|PSA5_HUMAN,sp|P02763|A1AG1_HUMAN,sp|Q9UL18|AGO1_HUMAN,sp|Q96DR8|MUCL1_HUMAN,sp|P02652|APOA2_HUMAN,sp|P00918|CAH2_HUMAN,sp|O75326|SEM7A_HUMAN,sp|P01023|A2MG_HUMAN,sp|P02671|FIBA_HUMAN,sp|P02675|FIBB_HUMAN,sp|P62834|RAP1A_HUMAN
biological_process	regulation of cell differentiation	18	0.00989174	sp|P61769|B2MG_HUMAN,sp|Q99436|PSB7_HUMAN,sp|P02679|FIBG_HUMAN,sp|P02647|APOA1_HUMAN,sp|P28066|PSA5_HUMAN,sp|P35052|GPC1_HUMAN,sp|P08582|TRFM_HUMAN,sp|O15296|LX15B_HUMAN,sp|P60953|CDC42_HUMAN,sp|Q9UL18|AGO1_HUMAN,sp|Q14118|DAG1_HUMAN,sp|P00918|CAH2_HUMAN,sp|O75326|SEM7A_HUMAN,sp|O43278|SPIT1_HUMAN,sp|P02671|FIBA_HUMAN,sp|P02675|FIBB_HUMAN,sp|Q9UL25|RAB21_HUMAN,sp|P62834|RAP1A_HUMAN
biological_process	positive regulation of macromolecule metabolic process	24	0.0101099	sp|Q99436|PSB7_HUMAN,sp|P02679|FIBG_HUMAN,sp|P80108|PHLD_HUMAN,sp|P12273|PIP_HUMAN,sp|P07355|ANXA2_HUMAN,sp|P46736|BRCC3_HUMAN,sp|P28066|PSA5_HUMAN,sp|P55072|TERA_HUMAN,sp|P50990|TCPQ_HUMAN,sp|P08582|TRFM_HUMAN,sp|P60953|CDC42_HUMAN,sp|P35579|MYH9_HUMAN,sp|Q9UL18|AGO1_HUMAN,sp|Q14118|DAG1_HUMAN,sp|P02652|APOA2_HUMAN,sp|P01034|CYTC_HUMAN,sp|O75326|SEM7A_HUMAN,sp|P61604|CH10_HUMAN,sp|P02671|FIBA_HU…
biological_process	regulation of system process	7	0.0101308	sp|Q14118|DAG1_HUMAN,sp|P02652|APOA2_HUMAN,sp|P02675|FIBB_HUMAN,sp|P02679|FIBG_HUMAN,sp|P02647|APOA1_HUMAN,sp|P02545|LMNA_HUMAN,sp|P02671|FIBA_HUMAN
biological_process	cell morphogenesis involved in neuron differentiation	6	0.0101867	sp|Q14118|DAG1_HUMAN,sp|O75326|SEM7A_HUMAN,sp|P35052|GPC1_HUMAN,sp|P50552|VASP_HUMAN,sp|P00492|HPRT_HUMAN,sp|P60953|CDC42_HUMAN
biological_process	drug transport	3	0.0102457	sp|P00918|CAH2_HUMAN,sp|P68871|HBB_HUMAN,sp|P69905|HBA_HUMAN
biological_process	regulation of sterol transport	3	0.0102457	sp|P07355|ANXA2_HUMAN,sp|P02652|APOA2_HUMAN,sp|P02647|APOA1_HUMAN
biological_process	regulation of cholesterol transport	3	0.0102457	sp|P07355|ANXA2_HUMAN,sp|P02652|APOA2_HUMAN,sp|P02647|APOA1_HUMAN
biological_process	regulation of lipid catabolic process	3	0.0102457	sp|P02652|APOA2_HUMAN,sp|O75874|IDHC_HUMAN,sp|P80108|PHLD_HUMAN
biological_process	regulation of extracellular matrix organization	3	0.0102457	sp|Q14118|DAG1_HUMAN,sp|P01034|CYTC_HUMAN,sp|P08582|TRFM_HUMAN
biological_process	negative regulation of multicellular organismal process	12	0.0103535	sp|P61769|B2MG_HUMAN,sp|P02652|APOA2_HUMAN,sp|P01034|CYTC_HUMAN,sp|P02679|FIBG_HUMAN,sp|Q16610|ECM1_HUMAN,sp|P02647|APOA1_HUMAN,sp|P02545|LMNA_HUMAN,sp|P02671|FIBA_HUMAN,sp|P07355|ANXA2_HUMAN,sp|P02675|FIBB_HUMAN,sp|P62834|RAP1A_HUMAN,sp|P02763|A1AG1_HUMAN
biological_process	defense response	15	0.0107611	sp|P02652|APOA2_HUMAN,sp|P01034|CYTC_HUMAN,sp|P01011|AACT_HUMAN,sp|O75326|SEM7A_HUMAN,sp|P01008|ANT3_HUMAN,sp|Q16610|ECM1_HUMAN,sp|P0C869|PA24B_HUMAN,sp|O00161|SNP23_HUMAN,sp|P02671|FIBA_HUMAN,sp|P04406|G3P_HUMAN,sp|P00738|HPT_HUMAN,sp|P02675|FIBB_HUMAN,sp|Q08380|LG3BP_HUMAN,sp|P81605|DCD_HUMAN,sp|P02763|A1AG1_HUMAN
biological_process	positive regulation of lipid metabolic process	4	0.0108937	sp|P02652|APOA2_HUMAN,sp|P80108|PHLD_HUMAN,sp|P60953|CDC42_HUMAN,sp|P02647|APOA1_HUMAN
biological_process	regulation of hormone levels	9	0.0109783	sp|P02679|FIBG_HUMAN,sp|P80108|PHLD_HUMAN,sp|O75787|RENR_HUMAN,sp|O00161|SNP23_HUMAN,sp|P02647|APOA1_HUMAN,sp|P02671|FIBA_HUMAN,sp|P02675|FIBB_HUMAN,sp|P16870|CBPE_HUMAN,sp|P62834|RAP1A_HUMAN
biological_process	cell morphogenesis involved in differentiation	7	0.0118514	sp|P35579|MYH9_HUMAN,sp|Q14118|DAG1_HUMAN,sp|O75326|SEM7A_HUMAN,sp|P35052|GPC1_HUMAN,sp|P50552|VASP_HUMAN,sp|P00492|HPRT_HUMAN,sp|P60953|CDC42_HUMAN
biological_process	cell development	14	0.0121231	sp|P35579|MYH9_HUMAN,sp|Q14118|DAG1_HUMAN,sp|P01034|CYTC_HUMAN,sp|P02679|FIBG_HUMAN,sp|O75326|SEM7A_HUMAN,sp|P50552|VASP_HUMAN,sp|P00492|HPRT_HUMAN,sp|P02647|APOA1_HUMAN,sp|P02545|LMNA_HUMAN,sp|P07355|ANXA2_HUMAN,sp|P35052|GPC1_HUMAN,sp|P62834|RAP1A_HUMAN,sp|P10909|CLUS_HUMAN,sp|P60953|CDC42_HUMAN
biological_process	positive regulation of cellular protein metabolic process	17	0.012219	sp|Q99436|PSB7_HUMAN,sp|P02679|FIBG_HUMAN,sp|P80108|PHLD_HUMAN,sp|P07355|ANXA2_HUMAN,sp|P28066|PSA5_HUMAN,sp|P55072|TERA_HUMAN,sp|P08582|TRFM_HUMAN,sp|P60953|CDC42_HUMAN,sp|P35579|MYH9_HUMAN,sp|Q14118|DAG1_HUMAN,sp|O75326|SEM7A_HUMAN,sp|P61604|CH10_HUMAN,sp|P02671|FIBA_HUMAN,sp|P02675|FIBB_HUMAN,sp|P62834|RAP1A_HUMAN,sp|O95831|AIFM1_HUMAN,sp|P10909|CLUS_HUMAN
biological_process	organic anion transport	6	0.012227	sp|P02652|APOA2_HUMAN,sp|P00918|CAH2_HUMAN,sp|P68871|HBB_HUMAN,sp|P23280|CAH6_HUMAN,sp|P69905|HBA_HUMAN,sp|P02647|APOA1_HUMAN
biological_process	positive regulation of protein metabolic process	18	0.0122709	sp|Q99436|PSB7_HUMAN,sp|P02679|FIBG_HUMAN,sp|P80108|PHLD_HUMAN,sp|P07355|ANXA2_HUMAN,sp|P28066|PSA5_HUMAN,sp|P55072|TERA_HUMAN,sp|P08582|TRFM_HUMAN,sp|P60953|CDC42_HUMAN,sp|P35579|MYH9_HUMAN,sp|Q14118|DAG1_HUMAN,sp|P02652|APOA2_HUMAN,sp|O75326|SEM7A_HUMAN,sp|P61604|CH10_HUMAN,sp|P02671|FIBA_HUMAN,sp|P02675|FIBB_HUMAN,sp|P62834|RAP1A_HUMAN,sp|O95831|AIFM1_HUMAN,sp|P10909|CLUS_HUMAN
biological_process	regulation of cytokine production	9	0.0124039	sp|P61769|B2MG_HUMAN,sp|P02652|APOA2_HUMAN,sp|O75326|SEM7A_HUMAN,sp|O75787|RENR_HUMAN,sp|P02647|APOA1_HUMAN,sp|P04406|G3P_HUMAN,sp|P02763|A1AG1_HUMAN,sp|O15296|LX15B_HUMAN,sp|P10909|CLUS_HUMAN
biological_process	regulation of secretion	11	0.0124149	sp|P02652|APOA2_HUMAN,sp|P02679|FIBG_HUMAN,sp|P80108|PHLD_HUMAN,sp|P02647|APOA1_HUMAN,sp|P02671|FIBA_HUMAN,sp|P04406|G3P_HUMAN,sp|P02675|FIBB_HUMAN,sp|Q9UL25|RAB21_HUMAN,sp|P02763|A1AG1_HUMAN,sp|P62834|RAP1A_HUMAN,sp|O15296|LX15B_HUMAN
biological_process	positive regulation of cell death	10	0.0133042	sp|P80108|PHLD_HUMAN,sp|P61604|CH10_HUMAN,sp|P04406|G3P_HUMAN,sp|P00738|HPT_HUMAN,sp|O95831|AIFM1_HUMAN,sp|P55072|TERA_HUMAN,sp|P68871|HBB_HUMAN,sp|P10909|CLUS_HUMAN,sp|P60953|CDC42_HUMAN,sp|P69905|HBA_HUMAN
biological_process	positive regulation of phosphorus metabolic process	11	0.0137243	sp|Q14118|DAG1_HUMAN,sp|P02679|FIBG_HUMAN,sp|P80108|PHLD_HUMAN,sp|O75326|SEM7A_HUMAN,sp|P02671|FIBA_HUMAN,sp|P07355|ANXA2_HUMAN,sp|P02675|FIBB_HUMAN,sp|P62834|RAP1A_HUMAN,sp|P55072|TERA_HUMAN,sp|P10909|CLUS_HUMAN,sp|P60953|CDC42_HUMAN
biological_process	positive regulation of phosphate metabolic process	11	0.0137243	sp|Q14118|DAG1_HUMAN,sp|P02679|FIBG_HUMAN,sp|P80108|PHLD_HUMAN,sp|O75326|SEM7A_HUMAN,sp|P02671|FIBA_HUMAN,sp|P07355|ANXA2_HUMAN,sp|P02675|FIBB_HUMAN,sp|P62834|RAP1A_HUMAN,sp|P55072|TERA_HUMAN,sp|P10909|CLUS_HUMAN,sp|P60953|CDC42_HUMAN
biological_process	regulation of nitrogen compound metabolic process	35	0.0138453	sp|Q99436|PSB7_HUMAN,sp|P80108|PHLD_HUMAN,sp|P01040|CYTA_HUMAN,sp|P07355|ANXA2_HUMAN,sp|P08582|TRFM_HUMAN,sp|P35579|MYH9_HUMAN,sp|P02652|APOA2_HUMAN,sp|P01034|CYTC_HUMAN,sp|O75326|SEM7A_HUMAN,sp|O75787|RENR_HUMAN,sp|P02671|FIBA_HUMAN,sp|P02545|LMNA_HUMAN,sp|P04406|G3P_HUMAN,sp|P62834|RAP1A_HUMAN,sp|P68871|HBB_HUMAN,sp|P35237|SPB6_HUMAN,sp|P10909|CLUS_HUMAN,sp|P02679|FIBG_HUMAN,sp|Q16610|ECM1_HUMA…
biological_process	regulation of hormone secretion	5	0.0140416	sp|P02675|FIBB_HUMAN,sp|P02679|FIBG_HUMAN,sp|P80108|PHLD_HUMAN,sp|P62834|RAP1A_HUMAN,sp|P02671|FIBA_HUMAN
biological_process	regulation of coagulation	5	0.0140416	sp|P07355|ANXA2_HUMAN,sp|P02675|FIBB_HUMAN,sp|P02679|FIBG_HUMAN,sp|P01008|ANT3_HUMAN,sp|P02671|FIBA_HUMAN
biological_process	regulation of production of molecular mediator of immune response	4	0.0144235	sp|P61769|B2MG_HUMAN,sp|P02652|APOA2_HUMAN,sp|O75326|SEM7A_HUMAN,sp|P02647|APOA1_HUMAN
biological_process	regulation of tube size	4	0.0144235	sp|P02675|FIBB_HUMAN,sp|P02679|FIBG_HUMAN,sp|P68871|HBB_HUMAN,sp|P02671|FIBA_HUMAN
biological_process	regulation of blood vessel size	4	0.0144235	sp|P02675|FIBB_HUMAN,sp|P02679|FIBG_HUMAN,sp|P68871|HBB_HUMAN,sp|P02671|FIBA_HUMAN
biological_process	regulated exocytosis	25	0.0145138	sp|Q9UEU0|VTI1B_HUMAN,sp|Q99436|PSB7_HUMAN,sp|P02679|FIBG_HUMAN,sp|Q16610|ECM1_HUMAN,sp|Q9NQR4|NIT2_HUMAN,sp|O00161|SNP23_HUMAN,sp|P07355|ANXA2_HUMAN,sp|P28066|PSA5_HUMAN,sp|O75874|IDHC_HUMAN,sp|Q99536|VAT1_HUMAN,sp|P02763|A1AG1_HUMAN,sp|P50990|TCPQ_HUMAN,sp|P30740|ILEU_HUMAN,sp|P01034|CYTC_HUMAN,sp|P01011|AACT_HUMAN,sp|O75787|RENR_HUMAN,sp|P01023|A2MG_HUMAN,sp|P02671|FIBA_HUMAN,sp|P00738|HPT_HUM…
biological_process	sprouting angiogenesis	2	0.0146935	sp|P80108|PHLD_HUMAN,sp|P60953|CDC42_HUMAN
biological_process	positive regulation of cytokine production involved in immune response	2	0.0146935	sp|P61769|B2MG_HUMAN,sp|O75326|SEM7A_HUMAN
biological_process	regulation of lipoprotein particle clearance	2	0.0146935	sp|P07355|ANXA2_HUMAN,sp|P80108|PHLD_HUMAN
biological_process	peptidyl-methionine modification	2	0.0146935	sp|P02652|APOA2_HUMAN,sp|P02647|APOA1_HUMAN
biological_process	regulation of intestinal cholesterol absorption	2	0.0146935	sp|P02652|APOA2_HUMAN,sp|P02647|APOA1_HUMAN
biological_process	phosphatidylserine acyl-chain remodeling	2	0.0146935	sp|Q3MJ16|PA24E_HUMAN,sp|P0C869|PA24B_HUMAN
biological_process	response to sterol	2	0.0146935	sp|Q14118|DAG1_HUMAN,sp|P80108|PHLD_HUMAN
biological_process	cellular response to sterol	2	0.0146935	sp|Q14118|DAG1_HUMAN,sp|P80108|PHLD_HUMAN
biological_process	induction of bacterial agglutination	2	0.0146935	sp|P02675|FIBB_HUMAN,sp|P02671|FIBA_HUMAN
biological_process	positive regulation of neuron apoptotic process	2	0.0146935	sp|O95831|AIFM1_HUMAN,sp|P60953|CDC42_HUMAN
biological_process	negative regulation of lipid catabolic process	2	0.0146935	sp|P02652|APOA2_HUMAN,sp|P80108|PHLD_HUMAN
biological_process	neuron apoptotic process	2	0.0146935	sp|P04406|G3P_HUMAN,sp|O95831|AIFM1_HUMAN
biological_process	response to cholesterol	2	0.0146935	sp|Q14118|DAG1_HUMAN,sp|P80108|PHLD_HUMAN
biological_process	cellular response to cholesterol	2	0.0146935	sp|Q14118|DAG1_HUMAN,sp|P80108|PHLD_HUMAN
biological_process	regulation of intestinal absorption	2	0.0146935	sp|P02652|APOA2_HUMAN,sp|P02647|APOA1_HUMAN
biological_process	regulation of intestinal lipid absorption	2	0.0146935	sp|P02652|APOA2_HUMAN,sp|P02647|APOA1_HUMAN
biological_process	epithelial cell migration	3	0.0155458	sp|P35579|MYH9_HUMAN,sp|P80108|PHLD_HUMAN,sp|P02647|APOA1_HUMAN
biological_process	zymogen activation	3	0.0155458	sp|P02675|FIBB_HUMAN,sp|P02679|FIBG_HUMAN,sp|P02671|FIBA_HUMAN
biological_process	epithelium migration	3	0.0155458	sp|P35579|MYH9_HUMAN,sp|P80108|PHLD_HUMAN,sp|P02647|APOA1_HUMAN
biological_process	regulation of extrinsic apoptotic signaling pathway via death domain receptors	3	0.0155458	sp|P02675|FIBB_HUMAN,sp|P02679|FIBG_HUMAN,sp|P02671|FIBA_HUMAN
biological_process	multicellular organismal process	49	0.0166677	sp|P80108|PHLD_HUMAN,sp|P01040|CYTA_HUMAN,sp|P12273|PIP_HUMAN,sp|P07355|ANXA2_HUMAN,sp|O75874|IDHC_HUMAN,sp|P35052|GPC1_HUMAN,sp|O15296|LX15B_HUMAN,sp|P35579|MYH9_HUMAN,sp|P02652|APOA2_HUMAN,sp|P01034|CYTC_HUMAN,sp|P01011|AACT_HUMAN,sp|O75326|SEM7A_HUMAN,sp|P0C869|PA24B_HUMAN,sp|O75787|RENR_HUMAN,sp|P02671|FIBA_HUMAN,sp|P02545|LMNA_HUMAN,sp|P19012|K1C15_HUMAN,sp|P62834|RAP1A_HUMAN,sp|P68871|HBB_H…
biological_process	cell activation	25	0.0170918	sp|P61769|B2MG_HUMAN,sp|Q99436|PSB7_HUMAN,sp|P02679|FIBG_HUMAN,sp|Q9NQR4|NIT2_HUMAN,sp|O00161|SNP23_HUMAN,sp|P07355|ANXA2_HUMAN,sp|O75874|IDHC_HUMAN,sp|P28066|PSA5_HUMAN,sp|Q99536|VAT1_HUMAN,sp|P02763|A1AG1_HUMAN,sp|P50990|TCPQ_HUMAN,sp|P30740|ILEU_HUMAN,sp|P35579|MYH9_HUMAN,sp|P01034|CYTC_HUMAN,sp|P01011|AACT_HUMAN,sp|O75787|RENR_HUMAN,sp|P02671|FIBA_HUMAN,sp|P00492|HPRT_HUMAN,sp|P00738|HPT_HUMA…
biological_process	circulatory system process	6	0.0171428	sp|P02675|FIBB_HUMAN,sp|P02679|FIBG_HUMAN,sp|O75787|RENR_HUMAN,sp|P68871|HBB_HUMAN,sp|P60953|CDC42_HUMAN,sp|P02671|FIBA_HUMAN
biological_process	blood circulation	6	0.0171428	sp|P02675|FIBB_HUMAN,sp|P02679|FIBG_HUMAN,sp|O75787|RENR_HUMAN,sp|P68871|HBB_HUMAN,sp|P60953|CDC42_HUMAN,sp|P02671|FIBA_HUMAN
biological_process	regulation of proteolysis	14	0.0181555	sp|P35579|MYH9_HUMAN,sp|P01034|CYTC_HUMAN,sp|Q99436|PSB7_HUMAN,sp|P80108|PHLD_HUMAN,sp|Q16610|ECM1_HUMAN,sp|P01023|A2MG_HUMAN,sp|P61604|CH10_HUMAN,sp|P01040|CYTA_HUMAN,sp|P28066|PSA5_HUMAN,sp|O95831|AIFM1_HUMAN,sp|P55072|TERA_HUMAN,sp|P08582|TRFM_HUMAN,sp|P35237|SPB6_HUMAN,sp|P10909|CLUS_HUMAN
biological_process	blood coagulation	7	0.01828	sp|P35579|MYH9_HUMAN,sp|P02675|FIBB_HUMAN,sp|P02679|FIBG_HUMAN,sp|P01008|ANT3_HUMAN,sp|P01023|A2MG_HUMAN,sp|P68871|HBB_HUMAN,sp|P02671|FIBA_HUMAN
biological_process	vascular process in circulatory system	4	0.0186034	sp|P02675|FIBB_HUMAN,sp|P02679|FIBG_HUMAN,sp|P68871|HBB_HUMAN,sp|P02671|FIBA_HUMAN
biological_process	negative regulation of blood coagulation	4	0.0186034	sp|P07355|ANXA2_HUMAN,sp|P02675|FIBB_HUMAN,sp|P02679|FIBG_HUMAN,sp|P02671|FIBA_HUMAN
biological_process	negative regulation of hemostasis	4	0.0186034	sp|P07355|ANXA2_HUMAN,sp|P02675|FIBB_HUMAN,sp|P02679|FIBG_HUMAN,sp|P02671|FIBA_HUMAN
biological_process	negative regulation of extrinsic apoptotic signaling pathway	4	0.0186034	sp|P02675|FIBB_HUMAN,sp|P02679|FIBG_HUMAN,sp|P02545|LMNA_HUMAN,sp|P02671|FIBA_HUMAN
biological_process	ion transport	12	0.0196458	sp|P61769|B2MG_HUMAN,sp|P02652|APOA2_HUMAN,sp|P00918|CAH2_HUMAN,sp|P00450|CERU_HUMAN,sp|O00161|SNP23_HUMAN,sp|P23280|CAH6_HUMAN,sp|P02647|APOA1_HUMAN,sp|Q9NTM9|CUTC_HUMAN,sp|P08582|TRFM_HUMAN,sp|Q9UHW9|S12A6_HUMAN,sp|P68871|HBB_HUMAN,sp|P69905|HBA_HUMAN
biological_process	regulation of primary metabolic process	36	0.0200575	sp|Q99436|PSB7_HUMAN,sp|P80108|PHLD_HUMAN,sp|P01040|CYTA_HUMAN,sp|P07355|ANXA2_HUMAN,sp|O75874|IDHC_HUMAN,sp|P08582|TRFM_HUMAN,sp|P35579|MYH9_HUMAN,sp|P02652|APOA2_HUMAN,sp|P01034|CYTC_HUMAN,sp|P01011|AACT_HUMAN,sp|O75326|SEM7A_HUMAN,sp|O75787|RENR_HUMAN,sp|P02671|FIBA_HUMAN,sp|P02545|LMNA_HUMAN,sp|P04406|G3P_HUMAN,sp|P62834|RAP1A_HUMAN,sp|P35237|SPB6_HUMAN,sp|P10909|CLUS_HUMAN,sp|P02679|FIBG_HUM…
biological_process	gland development	7	0.0208846	sp|Q14118|DAG1_HUMAN,sp|P01034|CYTC_HUMAN,sp|P01008|ANT3_HUMAN,sp|P62834|RAP1A_HUMAN,sp|P60953|CDC42_HUMAN,sp|P02647|APOA1_HUMAN,sp|O15296|LX15B_HUMAN
biological_process	coagulation	7	0.0208846	sp|P35579|MYH9_HUMAN,sp|P02675|FIBB_HUMAN,sp|P02679|FIBG_HUMAN,sp|P01008|ANT3_HUMAN,sp|P01023|A2MG_HUMAN,sp|P68871|HBB_HUMAN,sp|P02671|FIBA_HUMAN
biological_process	positive regulation of proteolysis	9	0.0216948	sp|P35579|MYH9_HUMAN,sp|Q99436|PSB7_HUMAN,sp|P80108|PHLD_HUMAN,sp|P61604|CH10_HUMAN,sp|P28066|PSA5_HUMAN,sp|O95831|AIFM1_HUMAN,sp|P08582|TRFM_HUMAN,sp|P55072|TERA_HUMAN,sp|P10909|CLUS_HUMAN
biological_process	secretion	27	0.0218934	sp|Q9UEU0|VTI1B_HUMAN,sp|Q99436|PSB7_HUMAN,sp|P02679|FIBG_HUMAN,sp|Q16610|ECM1_HUMAN,sp|Q9NQR4|NIT2_HUMAN,sp|O00161|SNP23_HUMAN,sp|P07355|ANXA2_HUMAN,sp|P28066|PSA5_HUMAN,sp|O75874|IDHC_HUMAN,sp|Q99536|VAT1_HUMAN,sp|P02763|A1AG1_HUMAN,sp|P50990|TCPQ_HUMAN,sp|P30740|ILEU_HUMAN,sp|P01034|CYTC_HUMAN,sp|P01011|AACT_HUMAN,sp|P00918|CAH2_HUMAN,sp|O75787|RENR_HUMAN,sp|P01008|ANT3_HUMAN,sp|P01023|A2MG_HU…
biological_process	positive regulation of phosphorylation	10	0.0220764	sp|Q14118|DAG1_HUMAN,sp|P02679|FIBG_HUMAN,sp|O75326|SEM7A_HUMAN,sp|P02671|FIBA_HUMAN,sp|P07355|ANXA2_HUMAN,sp|P02675|FIBB_HUMAN,sp|P62834|RAP1A_HUMAN,sp|P55072|TERA_HUMAN,sp|P10909|CLUS_HUMAN,sp|P60953|CDC42_HUMAN
biological_process	integrin-mediated signaling pathway	3	0.0221174	sp|P35579|MYH9_HUMAN,sp|O75326|SEM7A_HUMAN,sp|P02647|APOA1_HUMAN
biological_process	ensheathment of neurons	3	0.0221174	sp|Q14118|DAG1_HUMAN,sp|P35052|GPC1_HUMAN,sp|P10909|CLUS_HUMAN
biological_process	axon ensheathment	3	0.0221174	sp|Q14118|DAG1_HUMAN,sp|P35052|GPC1_HUMAN,sp|P10909|CLUS_HUMAN
biological_process	neural tube development	3	0.0221174	sp|O75787|RENR_HUMAN,sp|O43278|SPIT1_HUMAN,sp|P50552|VASP_HUMAN
biological_process	myelination	3	0.0221174	sp|Q14118|DAG1_HUMAN,sp|P35052|GPC1_HUMAN,sp|P10909|CLUS_HUMAN
biological_process	response to axon injury	3	0.0221174	sp|Q14118|DAG1_HUMAN,sp|P01034|CYTC_HUMAN,sp|P02647|APOA1_HUMAN
biological_process	positive regulation of cytokine secretion	3	0.0221174	sp|P04406|G3P_HUMAN,sp|P02763|A1AG1_HUMAN,sp|O15296|LX15B_HUMAN
biological_process	tissue migration	3	0.0221174	sp|P35579|MYH9_HUMAN,sp|P80108|PHLD_HUMAN,sp|P02647|APOA1_HUMAN
biological_process	exocytosis	25	0.0222005	sp|Q9UEU0|VTI1B_HUMAN,sp|Q99436|PSB7_HUMAN,sp|P02679|FIBG_HUMAN,sp|Q16610|ECM1_HUMAN,sp|Q9NQR4|NIT2_HUMAN,sp|O00161|SNP23_HUMAN,sp|P07355|ANXA2_HUMAN,sp|P28066|PSA5_HUMAN,sp|O75874|IDHC_HUMAN,sp|Q99536|VAT1_HUMAN,sp|P02763|A1AG1_HUMAN,sp|P50990|TCPQ_HUMAN,sp|P30740|ILEU_HUMAN,sp|P01034|CYTC_HUMAN,sp|P01011|AACT_HUMAN,sp|O75787|RENR_HUMAN,sp|P01023|A2MG_HUMAN,sp|P02671|FIBA_HUMAN,sp|P00738|HPT_HUM…
biological_process	cell morphogenesis	8	0.0230291	sp|P35579|MYH9_HUMAN,sp|Q14118|DAG1_HUMAN,sp|O75326|SEM7A_HUMAN,sp|P35052|GPC1_HUMAN,sp|P50552|VASP_HUMAN,sp|P00492|HPRT_HUMAN,sp|P60953|CDC42_HUMAN,sp|P10909|CLUS_HUMAN
biological_process	neuron projection morphogenesis	6	0.0232796	sp|Q14118|DAG1_HUMAN,sp|O75326|SEM7A_HUMAN,sp|P35052|GPC1_HUMAN,sp|P50552|VASP_HUMAN,sp|P00492|HPRT_HUMAN,sp|P60953|CDC42_HUMAN
biological_process	transport	49	0.0237136	sp|Q99436|PSB7_HUMAN,sp|P80108|PHLD_HUMAN,sp|P12273|PIP_HUMAN,sp|P07355|ANXA2_HUMAN,sp|O75874|IDHC_HUMAN,sp|P02763|A1AG1_HUMAN,sp|P30740|ILEU_HUMAN,sp|P08582|TRFM_HUMAN,sp|P35579|MYH9_HUMAN,sp|P02652|APOA2_HUMAN,sp|P01034|CYTC_HUMAN,sp|P01011|AACT_HUMAN,sp|O75787|RENR_HUMAN,sp|P02671|FIBA_HUMAN,sp|P02545|LMNA_HUMAN,sp|P00738|HPT_HUMAN,sp|Q9NTM9|CUTC_HUMAN,sp|Q08380|LG3BP_HUMAN,sp|P06737|PYGL_HUMA…
biological_process	hemostasis	7	0.0237387	sp|P35579|MYH9_HUMAN,sp|P02675|FIBB_HUMAN,sp|P02679|FIBG_HUMAN,sp|P01008|ANT3_HUMAN,sp|P01023|A2MG_HUMAN,sp|P68871|HBB_HUMAN,sp|P02671|FIBA_HUMAN
biological_process	cell-cell adhesion	7	0.0237387	sp|P35579|MYH9_HUMAN,sp|P02675|FIBB_HUMAN,sp|P02679|FIBG_HUMAN,sp|P01040|CYTA_HUMAN,sp|P68871|HBB_HUMAN,sp|P60953|CDC42_HUMAN,sp|P02671|FIBA_HUMAN
biological_process	positive regulation of secretion by cell	7	0.0237387	sp|P04406|G3P_HUMAN,sp|P02675|FIBB_HUMAN,sp|P02679|FIBG_HUMAN,sp|P80108|PHLD_HUMAN,sp|P02763|A1AG1_HUMAN,sp|P02671|FIBA_HUMAN,sp|O15296|LX15B_HUMAN
biological_process	microtubule cytoskeleton organization	5	0.0246985	sp|P35579|MYH9_HUMAN,sp|P04406|G3P_HUMAN,sp|Q14118|DAG1_HUMAN,sp|Q15018|ABRX2_HUMAN,sp|P02545|LMNA_HUMAN
biological_process	regulation of wound healing	5	0.0246985	sp|P07355|ANXA2_HUMAN,sp|P02675|FIBB_HUMAN,sp|P02679|FIBG_HUMAN,sp|P01008|ANT3_HUMAN,sp|P02671|FIBA_HUMAN
biological_process	axon development	5	0.0246985	sp|Q14118|DAG1_HUMAN,sp|O75326|SEM7A_HUMAN,sp|P35052|GPC1_HUMAN,sp|P50552|VASP_HUMAN,sp|P02647|APOA1_HUMAN
biological_process	response to inorganic substance	11	0.026041	sp|P61769|B2MG_HUMAN,sp|P01034|CYTC_HUMAN,sp|P00918|CAH2_HUMAN,sp|P02679|FIBG_HUMAN,sp|P80108|PHLD_HUMAN,sp|P02671|FIBA_HUMAN,sp|P00738|HPT_HUMAN,sp|P02675|FIBB_HUMAN,sp|O95831|AIFM1_HUMAN,sp|P68871|HBB_HUMAN,sp|P69905|HBA_HUMAN
biological_process	regulation of DNA metabolic process	6	0.0268422	sp|P01034|CYTC_HUMAN,sp|P46736|BRCC3_HUMAN,sp|O95831|AIFM1_HUMAN,sp|P50990|TCPQ_HUMAN,sp|P60953|CDC42_HUMAN,sp|P02545|LMNA_HUMAN
biological_process	plasma membrane bounded cell projection morphogenesis	6	0.0268422	sp|Q14118|DAG1_HUMAN,sp|O75326|SEM7A_HUMAN,sp|P35052|GPC1_HUMAN,sp|P50552|VASP_HUMAN,sp|P00492|HPRT_HUMAN,sp|P60953|CDC42_HUMAN
biological_process	negative regulation of biological process	36	0.026947	sp|Q99436|PSB7_HUMAN,sp|P80108|PHLD_HUMAN,sp|P01040|CYTA_HUMAN,sp|P12273|PIP_HUMAN,sp|P07355|ANXA2_HUMAN,sp|P35052|GPC1_HUMAN,sp|P02763|A1AG1_HUMAN,sp|P08582|TRFM_HUMAN,sp|O15296|LX15B_HUMAN,sp|P35579|MYH9_HUMAN,sp|P02652|APOA2_HUMAN,sp|P01034|CYTC_HUMAN,sp|P02671|FIBA_HUMAN,sp|P02545|LMNA_HUMAN,sp|P00738|HPT_HUMAN,sp|P04406|G3P_HUMAN,sp|P62834|RAP1A_HUMAN,sp|P35237|SPB6_HUMAN,sp|P10909|CLUS_HUMA…
biological_process	system development	36	0.026947	sp|P80108|PHLD_HUMAN,sp|P01040|CYTA_HUMAN,sp|P07355|ANXA2_HUMAN,sp|O75874|IDHC_HUMAN,sp|P35052|GPC1_HUMAN,sp|O15296|LX15B_HUMAN,sp|P35579|MYH9_HUMAN,sp|P02652|APOA2_HUMAN,sp|P01034|CYTC_HUMAN,sp|O75326|SEM7A_HUMAN,sp|O75787|RENR_HUMAN,sp|P02545|LMNA_HUMAN,sp|P19012|K1C15_HUMAN,sp|P62834|RAP1A_HUMAN,sp|Q9UHW9|S12A6_HUMAN,sp|P10909|CLUS_HUMAN,sp|P61769|B2MG_HUMAN,sp|P43304|GPDM_HUMAN,sp|Q16610|ECM1…
biological_process	negative regulation of cytokine production involved in immune response	2	0.0280126	sp|P02652|APOA2_HUMAN,sp|P02647|APOA1_HUMAN
biological_process	response to ischemia	2	0.0280126	sp|Q15018|ABRX2_HUMAN,sp|O95831|AIFM1_HUMAN
biological_process	phosphatidylcholine biosynthetic process	2	0.0280126	sp|P02652|APOA2_HUMAN,sp|P02647|APOA1_HUMAN
biological_process	phosphatidylserine metabolic process	2	0.0280126	sp|Q3MJ16|PA24E_HUMAN,sp|P0C869|PA24B_HUMAN
biological_process	mitotic nuclear envelope disassembly	2	0.0280126	sp|O75531|BAF_HUMAN,sp|P02545|LMNA_HUMAN
biological_process	mitotic nuclear envelope reassembly	2	0.0280126	sp|O75531|BAF_HUMAN,sp|P02545|LMNA_HUMAN
biological_process	regulation of gastrulation	2	0.0280126	sp|Q14118|DAG1_HUMAN,sp|P02647|APOA1_HUMAN
biological_process	positive regulation of gliogenesis	2	0.0280126	sp|Q14118|DAG1_HUMAN,sp|O43278|SPIT1_HUMAN
biological_process	Schwann cell differentiation	2	0.0280126	sp|Q14118|DAG1_HUMAN,sp|P35052|GPC1_HUMAN
biological_process	dsRNA fragmentation	2	0.0280126	sp|Q15631|TSN_HUMAN,sp|Q9UL18|AGO1_HUMAN
biological_process	axon regeneration	2	0.0280126	sp|Q14118|DAG1_HUMAN,sp|P02647|APOA1_HUMAN
biological_process	high-density lipoprotein particle remodeling	2	0.0280126	sp|P02652|APOA2_HUMAN,sp|P02647|APOA1_HUMAN
biological_process	high-density lipoprotein particle assembly	2	0.0280126	sp|P02652|APOA2_HUMAN,sp|P02647|APOA1_HUMAN
biological_process	reverse cholesterol transport	2	0.0280126	sp|P02652|APOA2_HUMAN,sp|P02647|APOA1_HUMAN
biological_process	positive regulation of glial cell differentiation	2	0.0280126	sp|Q14118|DAG1_HUMAN,sp|O43278|SPIT1_HUMAN
biological_process	dendrite morphogenesis	2	0.0280126	sp|P00492|HPRT_HUMAN,sp|P60953|CDC42_HUMAN
biological_process	regulation of interleukin-1 beta secretion	2	0.0280126	sp|P02763|A1AG1_HUMAN,sp|P02647|APOA1_HUMAN
biological_process	protein K63-linked deubiquitination	2	0.0280126	sp|Q15018|ABRX2_HUMAN,sp|P46736|BRCC3_HUMAN
biological_process	production of small RNA involved in gene silencing by RNA	2	0.0280126	sp|Q15631|TSN_HUMAN,sp|Q9UL18|AGO1_HUMAN
biological_process	neuron death	2	0.0280126	sp|P04406|G3P_HUMAN,sp|O95831|AIFM1_HUMAN
biological_process	cellular response to osmotic stress	2	0.0280126	sp|Q9UHW9|S12A6_HUMAN,sp|P35237|SPB6_HUMAN
biological_process	iron ion import	2	0.0280126	sp|P61769|B2MG_HUMAN,sp|P08582|TRFM_HUMAN
biological_process	response to bronchodilator	2	0.0280126	sp|O95831|AIFM1_HUMAN,sp|P00492|HPRT_HUMAN
biological_process	positive regulation of extracellular matrix organization	2	0.0280126	sp|Q14118|DAG1_HUMAN,sp|P08582|TRFM_HUMAN
biological_process	regulation of immune response	14	0.0281789	sp|Q96DR8|MUCL1_HUMAN,sp|P61769|B2MG_HUMAN,sp|P02652|APOA2_HUMAN,sp|Q99436|PSB7_HUMAN,sp|P02679|FIBG_HUMAN,sp|P80108|PHLD_HUMAN,sp|O75326|SEM7A_HUMAN,sp|Q16610|ECM1_HUMAN,sp|P01023|A2MG_HUMAN,sp|P02647|APOA1_HUMAN,sp|P02671|FIBA_HUMAN,sp|P28066|PSA5_HUMAN,sp|P02675|FIBB_HUMAN,sp|P62834|RAP1A_HUMAN
biological_process	cell-matrix adhesion	4	0.0290299	sp|Q14118|DAG1_HUMAN,sp|P02675|FIBB_HUMAN,sp|P02679|FIBG_HUMAN,sp|P02671|FIBA_HUMAN
biological_process	negative regulation of coagulation	4	0.0290299	sp|P07355|ANXA2_HUMAN,sp|P02675|FIBB_HUMAN,sp|P02679|FIBG_HUMAN,sp|P02671|FIBA_HUMAN
biological_process	cellular response to abiotic stimulus	4	0.0290299	sp|Q14118|DAG1_HUMAN,sp|P80108|PHLD_HUMAN,sp|Q9UHW9|S12A6_HUMAN,sp|P35237|SPB6_HUMAN
biological_process	protein activation cascade	4	0.0290299	sp|P02675|FIBB_HUMAN,sp|P02679|FIBG_HUMAN,sp|P01023|A2MG_HUMAN,sp|P02671|FIBA_HUMAN
biological_process	cellular response to environmental stimulus	4	0.0290299	sp|Q14118|DAG1_HUMAN,sp|P80108|PHLD_HUMAN,sp|Q9UHW9|S12A6_HUMAN,sp|P35237|SPB6_HUMAN
biological_process	response to wounding	10	0.0290459	sp|P35579|MYH9_HUMAN,sp|Q14118|DAG1_HUMAN,sp|P01034|CYTC_HUMAN,sp|P02679|FIBG_HUMAN,sp|P01008|ANT3_HUMAN,sp|P01023|A2MG_HUMAN,sp|P02647|APOA1_HUMAN,sp|P02671|FIBA_HUMAN,sp|P02675|FIBB_HUMAN,sp|P68871|HBB_HUMAN
biological_process	regulation of ERK1 and ERK2 cascade	5	0.0291596	sp|P02675|FIBB_HUMAN,sp|P02679|FIBG_HUMAN,sp|O75326|SEM7A_HUMAN,sp|P62834|RAP1A_HUMAN,sp|P02671|FIBA_HUMAN
biological_process	regulation of response to wounding	5	0.0291596	sp|P07355|ANXA2_HUMAN,sp|P02675|FIBB_HUMAN,sp|P02679|FIBG_HUMAN,sp|P01008|ANT3_HUMAN,sp|P02671|FIBA_HUMAN
biological_process	regulation of cellular metabolic process	36	0.0292329	sp|Q99436|PSB7_HUMAN,sp|P80108|PHLD_HUMAN,sp|P01040|CYTA_HUMAN,sp|P07355|ANXA2_HUMAN,sp|O75874|IDHC_HUMAN,sp|P08582|TRFM_HUMAN,sp|P35579|MYH9_HUMAN,sp|P02652|APOA2_HUMAN,sp|P01034|CYTC_HUMAN,sp|O75326|SEM7A_HUMAN,sp|O75787|RENR_HUMAN,sp|P02671|FIBA_HUMAN,sp|P02545|LMNA_HUMAN,sp|P00738|HPT_HUMAN,sp|P04406|G3P_HUMAN,sp|P62834|RAP1A_HUMAN,sp|P68871|HBB_HUMAN,sp|P35237|SPB6_HUMAN,sp|P10909|CLUS_HUMAN…
biological_process	regulation of biological quality	36	0.0292329	sp|Q99436|PSB7_HUMAN,sp|P80108|PHLD_HUMAN,sp|P12273|PIP_HUMAN,sp|P07355|ANXA2_HUMAN,sp|P08582|TRFM_HUMAN,sp|P35579|MYH9_HUMAN,sp|P02652|APOA2_HUMAN,sp|P01011|AACT_HUMAN,sp|O75326|SEM7A_HUMAN,sp|O75787|RENR_HUMAN,sp|P02671|FIBA_HUMAN,sp|P02545|LMNA_HUMAN,sp|P04406|G3P_HUMAN,sp|Q9NTM9|CUTC_HUMAN,sp|P06737|PYGL_HUMAN,sp|P62834|RAP1A_HUMAN,sp|P68871|HBB_HUMAN,sp|P10909|CLUS_HUMAN,sp|P61769|B2MG_HUMAN…
biological_process	axon guidance	3	0.0299741	sp|Q14118|DAG1_HUMAN,sp|P35052|GPC1_HUMAN,sp|P50552|VASP_HUMAN
biological_process	neuron projection guidance	3	0.0299741	sp|Q14118|DAG1_HUMAN,sp|P35052|GPC1_HUMAN,sp|P50552|VASP_HUMAN
biological_process	regulation of epithelial cell apoptotic process	3	0.0299741	sp|P02675|FIBB_HUMAN,sp|P02679|FIBG_HUMAN,sp|P02671|FIBA_HUMAN
biological_process	anion transport	6	0.0307511	sp|P02652|APOA2_HUMAN,sp|P00918|CAH2_HUMAN,sp|P68871|HBB_HUMAN,sp|P23280|CAH6_HUMAN,sp|P69905|HBA_HUMAN,sp|P02647|APOA1_HUMAN
biological_process	positive regulation of cell adhesion	6	0.0307511	sp|Q14118|DAG1_HUMAN,sp|P02675|FIBB_HUMAN,sp|P02679|FIBG_HUMAN,sp|P60953|CDC42_HUMAN,sp|P02647|APOA1_HUMAN,sp|P02671|FIBA_HUMAN
biological_process	cell projection morphogenesis	6	0.0307511	sp|Q14118|DAG1_HUMAN,sp|O75326|SEM7A_HUMAN,sp|P35052|GPC1_HUMAN,sp|P50552|VASP_HUMAN,sp|P00492|HPRT_HUMAN,sp|P60953|CDC42_HUMAN
biological_process	regulation of cellular component organization	23	0.0317157	sp|P61769|B2MG_HUMAN,sp|Q99436|PSB7_HUMAN,sp|P02679|FIBG_HUMAN,sp|P50552|VASP_HUMAN,sp|P02647|APOA1_HUMAN,sp|P07355|ANXA2_HUMAN,sp|Q99536|VAT1_HUMAN,sp|P55072|TERA_HUMAN,sp|P50990|TCPQ_HUMAN,sp|P08582|TRFM_HUMAN,sp|P60953|CDC42_HUMAN,sp|P35579|MYH9_HUMAN,sp|Q14118|DAG1_HUMAN,sp|P02652|APOA2_HUMAN,sp|P01034|CYTC_HUMAN,sp|O75326|SEM7A_HUMAN,sp|P02671|FIBA_HUMAN,sp|P02545|LMNA_HUMAN,sp|P02675|FIBB_H…
biological_process	establishment of localization	49	0.0319107	sp|Q99436|PSB7_HUMAN,sp|P80108|PHLD_HUMAN,sp|P12273|PIP_HUMAN,sp|P07355|ANXA2_HUMAN,sp|O75874|IDHC_HUMAN,sp|P02763|A1AG1_HUMAN,sp|P30740|ILEU_HUMAN,sp|P08582|TRFM_HUMAN,sp|P35579|MYH9_HUMAN,sp|P02652|APOA2_HUMAN,sp|P01034|CYTC_HUMAN,sp|P01011|AACT_HUMAN,sp|O75787|RENR_HUMAN,sp|P02671|FIBA_HUMAN,sp|P02545|LMNA_HUMAN,sp|P00738|HPT_HUMAN,sp|Q9NTM9|CUTC_HUMAN,sp|Q08380|LG3BP_HUMAN,sp|P06737|PYGL_HUMA…
biological_process	immune system process	34	0.032763	sp|Q99436|PSB7_HUMAN,sp|P80108|PHLD_HUMAN,sp|P07355|ANXA2_HUMAN,sp|O75874|IDHC_HUMAN,sp|P35052|GPC1_HUMAN,sp|P02763|A1AG1_HUMAN,sp|P30740|ILEU_HUMAN,sp|P35579|MYH9_HUMAN,sp|P01034|CYTC_HUMAN,sp|P01011|AACT_HUMAN,sp|O75326|SEM7A_HUMAN,sp|O75787|RENR_HUMAN,sp|P02671|FIBA_HUMAN,sp|P00738|HPT_HUMAN,sp|P04406|G3P_HUMAN,sp|P06737|PYGL_HUMAN,sp|P81605|DCD_HUMAN,sp|P62834|RAP1A_HUMAN,sp|P68871|HBB_HUMAN,…
biological_process	regulation of macromolecule metabolic process	35	0.0328991	sp|Q99436|PSB7_HUMAN,sp|P80108|PHLD_HUMAN,sp|P01040|CYTA_HUMAN,sp|P12273|PIP_HUMAN,sp|P07355|ANXA2_HUMAN,sp|P08582|TRFM_HUMAN,sp|P35579|MYH9_HUMAN,sp|P02652|APOA2_HUMAN,sp|P01034|CYTC_HUMAN,sp|O75326|SEM7A_HUMAN,sp|O75787|RENR_HUMAN,sp|P02671|FIBA_HUMAN,sp|P02545|LMNA_HUMAN,sp|P04406|G3P_HUMAN,sp|P62834|RAP1A_HUMAN,sp|P35237|SPB6_HUMAN,sp|P10909|CLUS_HUMAN,sp|P02679|FIBG_HUMAN,sp|Q16610|ECM1_HUMA…
biological_process	positive regulation of secretion	7	0.0338973	sp|P04406|G3P_HUMAN,sp|P02675|FIBB_HUMAN,sp|P02679|FIBG_HUMAN,sp|P80108|PHLD_HUMAN,sp|P02763|A1AG1_HUMAN,sp|P02671|FIBA_HUMAN,sp|O15296|LX15B_HUMAN
biological_process	response to hydrogen peroxide	5	0.034102	sp|P00738|HPT_HUMAN,sp|P01034|CYTC_HUMAN,sp|O95831|AIFM1_HUMAN,sp|P68871|HBB_HUMAN,sp|P69905|HBA_HUMAN
biological_process	organophosphate catabolic process	5	0.034102	sp|Q3MJ16|PA24E_HUMAN,sp|P02652|APOA2_HUMAN,sp|P0C869|PA24B_HUMAN,sp|P55072|TERA_HUMAN,sp|P00492|HPRT_HUMAN
biological_process	cell-substrate adhesion	4	0.0353167	sp|Q14118|DAG1_HUMAN,sp|P02675|FIBB_HUMAN,sp|P02679|FIBG_HUMAN,sp|P02671|FIBA_HUMAN
biological_process	negative regulation of wound healing	4	0.0353167	sp|P07355|ANXA2_HUMAN,sp|P02675|FIBB_HUMAN,sp|P02679|FIBG_HUMAN,sp|P02671|FIBA_HUMAN
biological_process	regulation of metabolic process	40	0.0362681	sp|Q99436|PSB7_HUMAN,sp|P80108|PHLD_HUMAN,sp|P01040|CYTA_HUMAN,sp|P12273|PIP_HUMAN,sp|P07355|ANXA2_HUMAN,sp|O75874|IDHC_HUMAN,sp|P08582|TRFM_HUMAN,sp|P35579|MYH9_HUMAN,sp|P02652|APOA2_HUMAN,sp|P01034|CYTC_HUMAN,sp|P01011|AACT_HUMAN,sp|O75326|SEM7A_HUMAN,sp|O75787|RENR_HUMAN,sp|P02671|FIBA_HUMAN,sp|P02545|LMNA_HUMAN,sp|P00738|HPT_HUMAN,sp|P04406|G3P_HUMAN,sp|P62834|RAP1A_HUMAN,sp|P68871|HBB_HUMAN,…
biological_process	anatomical structure morphogenesis	17	0.0367932	sp|P80108|PHLD_HUMAN,sp|Q16610|ECM1_HUMAN,sp|P50552|VASP_HUMAN,sp|P07355|ANXA2_HUMAN,sp|P35052|GPC1_HUMAN,sp|P16870|CBPE_HUMAN,sp|Q92764|KRT35_HUMAN,sp|P60953|CDC42_HUMAN,sp|P35579|MYH9_HUMAN,sp|Q14118|DAG1_HUMAN,sp|O75326|SEM7A_HUMAN,sp|P00918|CAH2_HUMAN,sp|O75787|RENR_HUMAN,sp|O43278|SPIT1_HUMAN,sp|P00492|HPRT_HUMAN,sp|Q9UHW9|S12A6_HUMAN,sp|P10909|CLUS_HUMAN
biological_process	regulation of anatomical structure size	8	0.0387724	sp|P02675|FIBB_HUMAN,sp|P02679|FIBG_HUMAN,sp|Q9UL25|RAB21_HUMAN,sp|O75326|SEM7A_HUMAN,sp|Q96CW1|AP2M1_HUMAN,sp|P68871|HBB_HUMAN,sp|P50552|VASP_HUMAN,sp|P02671|FIBA_HUMAN
biological_process	activation of cysteine-type endopeptidase activity involved in apoptotic process	3	0.0391056	sp|O95831|AIFM1_HUMAN,sp|P61604|CH10_HUMAN,sp|P55072|TERA_HUMAN
biological_process	acute-phase response	3	0.0391056	sp|P00738|HPT_HUMAN,sp|P01011|AACT_HUMAN,sp|P02763|A1AG1_HUMAN
biological_process	phospholipid catabolic process	3	0.0391056	sp|Q3MJ16|PA24E_HUMAN,sp|P02652|APOA2_HUMAN,sp|P0C869|PA24B_HUMAN
biological_process	animal organ regeneration	3	0.0391056	sp|P02652|APOA2_HUMAN,sp|P62834|RAP1A_HUMAN,sp|P02647|APOA1_HUMAN
biological_process	animal organ development	28	0.04066	sp|P61769|B2MG_HUMAN,sp|P43304|GPDM_HUMAN,sp|P80108|PHLD_HUMAN,sp|Q16610|ECM1_HUMAN,sp|P01040|CYTA_HUMAN,sp|P02647|APOA1_HUMAN,sp|P07355|ANXA2_HUMAN,sp|O75874|IDHC_HUMAN,sp|Q9NSB4|KRT82_HUMAN,sp|P16870|CBPE_HUMAN,sp|Q92764|KRT35_HUMAN,sp|Q6A163|K1C39_HUMAN,sp|P60953|CDC42_HUMAN,sp|O15296|LX15B_HUMAN,sp|P35579|MYH9_HUMAN,sp|Q14118|DAG1_HUMAN,sp|P02652|APOA2_HUMAN,sp|P01034|CYTC_HUMAN,sp|P00918|CAH…
biological_process	regulation of phosphate metabolic process	14	0.0418536	sp|Q14118|DAG1_HUMAN,sp|P02679|FIBG_HUMAN,sp|P80108|PHLD_HUMAN,sp|O75326|SEM7A_HUMAN,sp|O75787|RENR_HUMAN,sp|P02647|APOA1_HUMAN,sp|P02671|FIBA_HUMAN,sp|P07355|ANXA2_HUMAN,sp|P02675|FIBB_HUMAN,sp|O75874|IDHC_HUMAN,sp|P62834|RAP1A_HUMAN,sp|P55072|TERA_HUMAN,sp|P10909|CLUS_HUMAN,sp|P60953|CDC42_HUMAN
biological_process	negative regulation of response to wounding	4	0.042334	sp|P07355|ANXA2_HUMAN,sp|P02675|FIBB_HUMAN,sp|P02679|FIBG_HUMAN,sp|P02671|FIBA_HUMAN
biological_process	leukocyte activation	22	0.0425589	sp|P61769|B2MG_HUMAN,sp|Q99436|PSB7_HUMAN,sp|Q9NQR4|NIT2_HUMAN,sp|O00161|SNP23_HUMAN,sp|P07355|ANXA2_HUMAN,sp|O75874|IDHC_HUMAN,sp|P28066|PSA5_HUMAN,sp|Q99536|VAT1_HUMAN,sp|P02763|A1AG1_HUMAN,sp|P50990|TCPQ_HUMAN,sp|P30740|ILEU_HUMAN,sp|P35579|MYH9_HUMAN,sp|P01011|AACT_HUMAN,sp|P01034|CYTC_HUMAN,sp|O75787|RENR_HUMAN,sp|P00492|HPRT_HUMAN,sp|P00738|HPT_HUMAN,sp|P06737|PYGL_HUMAN,sp|P62834|RAP1A_HUM…
biological_process	regulation of MAPK cascade	8	0.0426235	sp|Q14118|DAG1_HUMAN,sp|P02679|FIBG_HUMAN,sp|O75326|SEM7A_HUMAN,sp|O75787|RENR_HUMAN,sp|P02671|FIBA_HUMAN,sp|P02675|FIBB_HUMAN,sp|P62834|RAP1A_HUMAN,sp|P60953|CDC42_HUMAN
biological_process	protein O-linked glycosylation	2	0.0445164	sp|Q96DR8|MUCL1_HUMAN,sp|Q14118|DAG1_HUMAN
biological_process	membrane protein ectodomain proteolysis	2	0.0445164	sp|P35579|MYH9_HUMAN,sp|Q14118|DAG1_HUMAN
biological_process	one-carbon metabolic process	2	0.0445164	sp|P00918|CAH2_HUMAN,sp|P23280|CAH6_HUMAN
biological_process	copper ion transport	2	0.0445164	sp|Q9NTM9|CUTC_HUMAN,sp|P00450|CERU_HUMAN
biological_process	body fluid secretion	2	0.0445164	sp|P07355|ANXA2_HUMAN,sp|P01008|ANT3_HUMAN
biological_process	regulation of collagen metabolic process	2	0.0445164	sp|P01034|CYTC_HUMAN,sp|P62834|RAP1A_HUMAN
biological_process	regulation of extracellular matrix disassembly	2	0.0445164	sp|P01034|CYTC_HUMAN,sp|P08582|TRFM_HUMAN
biological_process	regulation of cholesterol esterification	2	0.0445164	sp|P02652|APOA2_HUMAN,sp|P02647|APOA1_HUMAN
biological_process	positive regulation of cholesterol esterification	2	0.0445164	sp|P02652|APOA2_HUMAN,sp|P02647|APOA1_HUMAN
biological_process	peptide hormone processing	2	0.0445164	sp|P16870|CBPE_HUMAN,sp|O75787|RENR_HUMAN
biological_process	protein oxidation	2	0.0445164	sp|P02652|APOA2_HUMAN,sp|P02647|APOA1_HUMAN
biological_process	membrane disassembly	2	0.0445164	sp|O75531|BAF_HUMAN,sp|P02545|LMNA_HUMAN
biological_process	positive regulation of cell killing	2	0.0445164	sp|P04406|G3P_HUMAN,sp|P61769|B2MG_HUMAN
biological_process	nuclear envelope reassembly	2	0.0445164	sp|O75531|BAF_HUMAN,sp|P02545|LMNA_HUMAN
biological_process	phosphatidylethanolamine acyl-chain remodeling	2	0.0445164	sp|Q3MJ16|PA24E_HUMAN,sp|P0C869|PA24B_HUMAN
biological_process	regulation of digestive system process	2	0.0445164	sp|P02652|APOA2_HUMAN,sp|P02647|APOA1_HUMAN
biological_process	regulation of multicellular organismal metabolic process	2	0.0445164	sp|P01034|CYTC_HUMAN,sp|P62834|RAP1A_HUMAN
biological_process	nuclear envelope disassembly	2	0.0445164	sp|O75531|BAF_HUMAN,sp|P02545|LMNA_HUMAN
biological_process	response to misfolded protein	2	0.0445164	sp|P55072|TERA_HUMAN,sp|P10909|CLUS_HUMAN
biological_process	anatomical structure maturation	2	0.0445164	sp|Q14118|DAG1_HUMAN,sp|P02679|FIBG_HUMAN
biological_process	regulation of phospholipid metabolic process	2	0.0445164	sp|O75874|IDHC_HUMAN,sp|P60953|CDC42_HUMAN
biological_process	positive regulation of MAPK cascade	6	0.0446587	sp|P02675|FIBB_HUMAN,sp|P02679|FIBG_HUMAN,sp|O75326|SEM7A_HUMAN,sp|P62834|RAP1A_HUMAN,sp|P60953|CDC42_HUMAN,sp|P02671|FIBA_HUMAN
biological_process	glycerophospholipid metabolic process	5	0.0454743	sp|Q3MJ16|PA24E_HUMAN,sp|P02652|APOA2_HUMAN,sp|P80108|PHLD_HUMAN,sp|P0C869|PA24B_HUMAN,sp|P02647|APOA1_HUMAN
biological_process	negative regulation of catabolic process	5	0.0454743	sp|P07355|ANXA2_HUMAN,sp|P00738|HPT_HUMAN,sp|P02652|APOA2_HUMAN,sp|P01034|CYTC_HUMAN,sp|P80108|PHLD_HUMAN
biological_process	positive regulation of protein phosphorylation	9	0.0456828	sp|Q14118|DAG1_HUMAN,sp|P02679|FIBG_HUMAN,sp|O75326|SEM7A_HUMAN,sp|P02671|FIBA_HUMAN,sp|P07355|ANXA2_HUMAN,sp|P02675|FIBB_HUMAN,sp|P62834|RAP1A_HUMAN,sp|P10909|CLUS_HUMAN,sp|P60953|CDC42_HUMAN
biological_process	response to chemical	35	0.0465054	sp|Q99436|PSB7_HUMAN,sp|P80108|PHLD_HUMAN,sp|P12273|PIP_HUMAN,sp|P07355|ANXA2_HUMAN,sp|O75874|IDHC_HUMAN,sp|P35052|GPC1_HUMAN,sp|P02652|APOA2_HUMAN,sp|P01034|CYTC_HUMAN,sp|O75326|SEM7A_HUMAN,sp|P0C869|PA24B_HUMAN,sp|P02671|FIBA_HUMAN,sp|P02545|LMNA_HUMAN,sp|P00738|HPT_HUMAN,sp|P04406|G3P_HUMAN,sp|P62834|RAP1A_HUMAN,sp|P68871|HBB_HUMAN,sp|P69905|HBA_HUMAN,sp|P10909|CLUS_HUMAN,sp|P61769|B2MG_HUMAN,…
biological_process	cellular component morphogenesis	8	0.0467224	sp|P35579|MYH9_HUMAN,sp|Q14118|DAG1_HUMAN,sp|O75326|SEM7A_HUMAN,sp|P35052|GPC1_HUMAN,sp|P50552|VASP_HUMAN,sp|P00492|HPRT_HUMAN,sp|P60953|CDC42_HUMAN,sp|P10909|CLUS_HUMAN
biological_process	regulation of phosphorus metabolic process	14	0.0473277	sp|Q14118|DAG1_HUMAN,sp|P02679|FIBG_HUMAN,sp|P80108|PHLD_HUMAN,sp|O75326|SEM7A_HUMAN,sp|O75787|RENR_HUMAN,sp|P02647|APOA1_HUMAN,sp|P02671|FIBA_HUMAN,sp|P07355|ANXA2_HUMAN,sp|P02675|FIBB_HUMAN,sp|O75874|IDHC_HUMAN,sp|P62834|RAP1A_HUMAN,sp|P55072|TERA_HUMAN,sp|P10909|CLUS_HUMAN,sp|P60953|CDC42_HUMAN
biological_process	positive regulation of intracellular signal transduction	10	0.0474743	sp|Q9UL18|AGO1_HUMAN,sp|P02679|FIBG_HUMAN,sp|O75326|SEM7A_HUMAN,sp|Q16610|ECM1_HUMAN,sp|P02647|APOA1_HUMAN,sp|P02671|FIBA_HUMAN,sp|P26447|S10A4_HUMAN,sp|P02675|FIBB_HUMAN,sp|P62834|RAP1A_HUMAN,sp|P60953|CDC42_HUMAN
biological_process	neurogenesis	13	0.0481	sp|Q14118|DAG1_HUMAN,sp|P61769|B2MG_HUMAN,sp|O75326|SEM7A_HUMAN,sp|O43278|SPIT1_HUMAN,sp|P50552|VASP_HUMAN,sp|P00492|HPRT_HUMAN,sp|P02647|APOA1_HUMAN,sp|P35052|GPC1_HUMAN,sp|Q9UL25|RAB21_HUMAN,sp|O95831|AIFM1_HUMAN,sp|P62834|RAP1A_HUMAN,sp|P10909|CLUS_HUMAN,sp|P60953|CDC42_HUMAN
biological_process	generation of neurons	12	0.0484762	sp|Q14118|DAG1_HUMAN,sp|P61769|B2MG_HUMAN,sp|O75326|SEM7A_HUMAN,sp|O43278|SPIT1_HUMAN,sp|P50552|VASP_HUMAN,sp|P00492|HPRT_HUMAN,sp|P02647|APOA1_HUMAN,sp|P35052|GPC1_HUMAN,sp|Q9UL25|RAB21_HUMAN,sp|P62834|RAP1A_HUMAN,sp|O95831|AIFM1_HUMAN,sp|P60953|CDC42_HUMAN
biological_process	localization	51	0.048913	sp|Q99436|PSB7_HUMAN,sp|P80108|PHLD_HUMAN,sp|P12273|PIP_HUMAN,sp|P07355|ANXA2_HUMAN,sp|O75874|IDHC_HUMAN,sp|P35052|GPC1_HUMAN,sp|P02763|A1AG1_HUMAN,sp|P30740|ILEU_HUMAN,sp|P08582|TRFM_HUMAN,sp|P35579|MYH9_HUMAN,sp|P02652|APOA2_HUMAN,sp|P01034|CYTC_HUMAN,sp|P01011|AACT_HUMAN,sp|O75787|RENR_HUMAN,sp|P02671|FIBA_HUMAN,sp|P02545|LMNA_HUMAN,sp|P00738|HPT_HUMAN,sp|Q9NTM9|CUTC_HUMAN,sp|Q08380|LG3BP_HUMA…
biological_process	secretion by cell	25	0.0490968	sp|Q9UEU0|VTI1B_HUMAN,sp|Q99436|PSB7_HUMAN,sp|P02679|FIBG_HUMAN,sp|Q16610|ECM1_HUMAN,sp|Q9NQR4|NIT2_HUMAN,sp|O00161|SNP23_HUMAN,sp|P07355|ANXA2_HUMAN,sp|P28066|PSA5_HUMAN,sp|O75874|IDHC_HUMAN,sp|Q99536|VAT1_HUMAN,sp|P02763|A1AG1_HUMAN,sp|P50990|TCPQ_HUMAN,sp|P30740|ILEU_HUMAN,sp|P01034|CYTC_HUMAN,sp|P01011|AACT_HUMAN,sp|O75787|RENR_HUMAN,sp|P01023|A2MG_HUMAN,sp|P02671|FIBA_HUMAN,sp|P00738|HPT_HUM…
biological_process	ameboidal-type cell migration	3	0.0494823	sp|P35579|MYH9_HUMAN,sp|P80108|PHLD_HUMAN,sp|P02647|APOA1_HUMAN
biological_process	regulation of lipid transport	3	0.0494823	sp|P07355|ANXA2_HUMAN,sp|P02652|APOA2_HUMAN,sp|P02647|APOA1_HUMAN
biological_process	response to estrogen	3	0.0494823	sp|P02652|APOA2_HUMAN,sp|P00918|CAH2_HUMAN,sp|P02647|APOA1_HUMAN
biological_process	protein polymerization	3	0.0494823	sp|P02675|FIBB_HUMAN,sp|P02679|FIBG_HUMAN,sp|P02671|FIBA_HUMAN
biological_process	regulation of immune effector process	6	0.0500484	sp|P61769|B2MG_HUMAN,sp|P02652|APOA2_HUMAN,sp|O75326|SEM7A_HUMAN,sp|P01023|A2MG_HUMAN,sp|P62834|RAP1A_HUMAN,sp|P02647|APOA1_HUMAN
biological_process	cell part morphogenesis	6	0.0500484	sp|Q14118|DAG1_HUMAN,sp|O75326|SEM7A_HUMAN,sp|P35052|GPC1_HUMAN,sp|P50552|VASP_HUMAN,sp|P00492|HPRT_HUMAN,sp|P60953|CDC42_HUMAN
biological_process	positive regulation of DNA metabolic process	4	0.0500847	sp|P01034|CYTC_HUMAN,sp|P46736|BRCC3_HUMAN,sp|P50990|TCPQ_HUMAN,sp|P60953|CDC42_HUMAN
biological_process	response to calcium ion	4	0.0500847	sp|P02675|FIBB_HUMAN,sp|P02679|FIBG_HUMAN,sp|P80108|PHLD_HUMAN,sp|P02671|FIBA_HUMAN
biological_process	post-translational protein modification	10	0.051179	sp|P02652|APOA2_HUMAN,sp|P01034|CYTC_HUMAN,sp|Q99436|PSB7_HUMAN,sp|P02679|FIBG_HUMAN,sp|P80108|PHLD_HUMAN,sp|P01008|ANT3_HUMAN,sp|P00450|CERU_HUMAN,sp|P02671|FIBA_HUMAN,sp|P28066|PSA5_HUMAN,sp|P08582|TRFM_HUMAN
biological_process	neuron projection development	7	0.051475	sp|Q14118|DAG1_HUMAN,sp|O75326|SEM7A_HUMAN,sp|P35052|GPC1_HUMAN,sp|P50552|VASP_HUMAN,sp|P00492|HPRT_HUMAN,sp|P60953|CDC42_HUMAN,sp|P02647|APOA1_HUMAN
biological_process	protein processing	5	0.051919	sp|P02675|FIBB_HUMAN,sp|P02679|FIBG_HUMAN,sp|P16870|CBPE_HUMAN,sp|O75787|RENR_HUMAN,sp|P02671|FIBA_HUMAN
biological_process	antimicrobial humoral response	5	0.051919	sp|P04406|G3P_HUMAN,sp|P02675|FIBB_HUMAN,sp|P81605|DCD_HUMAN,sp|P10909|CLUS_HUMAN,sp|P02671|FIBA_HUMAN
biological_process	regulation of endocytosis	5	0.051919	sp|P07355|ANXA2_HUMAN,sp|P61769|B2MG_HUMAN,sp|Q9UL25|RAB21_HUMAN,sp|P62834|RAP1A_HUMAN,sp|P10909|CLUS_HUMAN
biological_process	negative regulation of apoptotic signaling pathway	5	0.051919	sp|P02675|FIBB_HUMAN,sp|P02679|FIBG_HUMAN,sp|P10909|CLUS_HUMAN,sp|P02545|LMNA_HUMAN,sp|P02671|FIBA_HUMAN
biological_process	positive regulation of protein modification process	12	0.0552219	sp|Q14118|DAG1_HUMAN,sp|Q99436|PSB7_HUMAN,sp|P02679|FIBG_HUMAN,sp|O75326|SEM7A_HUMAN,sp|P02671|FIBA_HUMAN,sp|P07355|ANXA2_HUMAN,sp|P28066|PSA5_HUMAN,sp|P02675|FIBB_HUMAN,sp|P62834|RAP1A_HUMAN,sp|P55072|TERA_HUMAN,sp|P10909|CLUS_HUMAN,sp|P60953|CDC42_HUMAN
biological_process	neuron differentiation	8	0.0556826	sp|Q14118|DAG1_HUMAN,sp|O75326|SEM7A_HUMAN,sp|P35052|GPC1_HUMAN,sp|O95831|AIFM1_HUMAN,sp|P50552|VASP_HUMAN,sp|P00492|HPRT_HUMAN,sp|P60953|CDC42_HUMAN,sp|P02647|APOA1_HUMAN
biological_process	oxidoreduction coenzyme metabolic process	6	0.0558245	sp|P04406|G3P_HUMAN,sp|O75874|IDHC_HUMAN,sp|P43304|GPDM_HUMAN,sp|P07195|LDHB_HUMAN,sp|P55072|TERA_HUMAN,sp|P40926|MDHM_HUMAN
biological_process	pyridine nucleotide metabolic process	6	0.0558245	sp|P04406|G3P_HUMAN,sp|O75874|IDHC_HUMAN,sp|P43304|GPDM_HUMAN,sp|P07195|LDHB_HUMAN,sp|P55072|TERA_HUMAN,sp|P40926|MDHM_HUMAN
biological_process	nicotinamide nucleotide metabolic process	6	0.0558245	sp|P04406|G3P_HUMAN,sp|O75874|IDHC_HUMAN,sp|P43304|GPDM_HUMAN,sp|P07195|LDHB_HUMAN,sp|P55072|TERA_HUMAN,sp|P40926|MDHM_HUMAN
biological_process	pyridine-containing compound metabolic process	6	0.0558245	sp|P04406|G3P_HUMAN,sp|O75874|IDHC_HUMAN,sp|P43304|GPDM_HUMAN,sp|P07195|LDHB_HUMAN,sp|P55072|TERA_HUMAN,sp|P40926|MDHM_HUMAN
biological_process	response to external stimulus	16	0.0559308	sp|P61769|B2MG_HUMAN,sp|O75531|BAF_HUMAN,sp|P50552|VASP_HUMAN,sp|P02647|APOA1_HUMAN,sp|P35052|GPC1_HUMAN,sp|P01034|CYTC_HUMAN,sp|Q14118|DAG1_HUMAN,sp|O75326|SEM7A_HUMAN,sp|P01008|ANT3_HUMAN,sp|P02671|FIBA_HUMAN,sp|P00738|HPT_HUMAN,sp|P04406|G3P_HUMAN,sp|P02675|FIBB_HUMAN,sp|P81605|DCD_HUMAN,sp|O95831|AIFM1_HUMAN,sp|P10909|CLUS_HUMAN
biological_process	positive regulation of signaling	17	0.0566294	sp|Q99436|PSB7_HUMAN,sp|P02679|FIBG_HUMAN,sp|P80108|PHLD_HUMAN,sp|Q16610|ECM1_HUMAN,sp|P02647|APOA1_HUMAN,sp|P07355|ANXA2_HUMAN,sp|P28066|PSA5_HUMAN,sp|O15296|LX15B_HUMAN,sp|P60953|CDC42_HUMAN,sp|Q9UL18|AGO1_HUMAN,sp|P00918|CAH2_HUMAN,sp|O75326|SEM7A_HUMAN,sp|O75787|RENR_HUMAN,sp|P02671|FIBA_HUMAN,sp|P26447|S10A4_HUMAN,sp|P02675|FIBB_HUMAN,sp|P62834|RAP1A_HUMAN
biological_process	cell adhesion	9	0.0580685	sp|P35579|MYH9_HUMAN,sp|Q14118|DAG1_HUMAN,sp|P02679|FIBG_HUMAN,sp|P01040|CYTA_HUMAN,sp|P02671|FIBA_HUMAN,sp|P02675|FIBB_HUMAN,sp|Q08380|LG3BP_HUMAN,sp|P68871|HBB_HUMAN,sp|P60953|CDC42_HUMAN
biological_process	transition metal ion transport	4	0.0585655	sp|Q9NTM9|CUTC_HUMAN,sp|P61769|B2MG_HUMAN,sp|P00450|CERU_HUMAN,sp|P08582|TRFM_HUMAN
biological_process	axonogenesis	4	0.0585655	sp|Q14118|DAG1_HUMAN,sp|O75326|SEM7A_HUMAN,sp|P35052|GPC1_HUMAN,sp|P50552|VASP_HUMAN
biological_process	lipoprotein metabolic process	4	0.0585655	sp|P02652|APOA2_HUMAN,sp|P80108|PHLD_HUMAN,sp|P08582|TRFM_HUMAN,sp|P02647|APOA1_HUMAN
biological_process	regulation of extrinsic apoptotic signaling pathway	4	0.0585655	sp|P02675|FIBB_HUMAN,sp|P02679|FIBG_HUMAN,sp|P02545|LMNA_HUMAN,sp|P02671|FIBA_HUMAN
biological_process	immune response	26	0.0590977	sp|P61769|B2MG_HUMAN,sp|Q99436|PSB7_HUMAN,sp|Q9NQR4|NIT2_HUMAN,sp|O00161|SNP23_HUMAN,sp|P07355|ANXA2_HUMAN,sp|P28066|PSA5_HUMAN,sp|O75874|IDHC_HUMAN,sp|Q99536|VAT1_HUMAN,sp|P02763|A1AG1_HUMAN,sp|P50990|TCPQ_HUMAN,sp|P30740|ILEU_HUMAN,sp|P01034|CYTC_HUMAN,sp|P01011|AACT_HUMAN,sp|O75326|SEM7A_HUMAN,sp|O75787|RENR_HUMAN,sp|P01008|ANT3_HUMAN,sp|P02671|FIBA_HUMAN,sp|P00738|HPT_HUMAN,sp|P04406|G3P_HUMA…
biological_process	response to drug	11	0.0593315	sp|P02652|APOA2_HUMAN,sp|P01034|CYTC_HUMAN,sp|P00918|CAH2_HUMAN,sp|P80108|PHLD_HUMAN,sp|P00492|HPRT_HUMAN,sp|P02647|APOA1_HUMAN,sp|P00738|HPT_HUMAN,sp|P62834|RAP1A_HUMAN,sp|O95831|AIFM1_HUMAN,sp|P68871|HBB_HUMAN,sp|P69905|HBA_HUMAN
biological_process	regulation of localization	23	0.0601655	sp|Q9UEU0|VTI1B_HUMAN,sp|P61769|B2MG_HUMAN,sp|Q99436|PSB7_HUMAN,sp|P02679|FIBG_HUMAN,sp|P80108|PHLD_HUMAN,sp|Q16610|ECM1_HUMAN,sp|P02647|APOA1_HUMAN,sp|P07355|ANXA2_HUMAN,sp|P02763|A1AG1_HUMAN,sp|P50990|TCPQ_HUMAN,sp|P60953|CDC42_HUMAN,sp|O15296|LX15B_HUMAN,sp|Q14118|DAG1_HUMAN,sp|P02652|APOA2_HUMAN,sp|P00918|CAH2_HUMAN,sp|Q96CW1|AP2M1_HUMAN,sp|P02671|FIBA_HUMAN,sp|P02545|LMNA_HUMAN,sp|P04406|G3P…
biological_process	pattern recognition receptor signaling pathway	3	0.0610589	sp|P02675|FIBB_HUMAN,sp|P02679|FIBG_HUMAN,sp|P02671|FIBA_HUMAN
biological_process	toll-like receptor signaling pathway	3	0.0610589	sp|P02675|FIBB_HUMAN,sp|P02679|FIBG_HUMAN,sp|P02671|FIBA_HUMAN
biological_process	tube morphogenesis	3	0.0610589	sp|Q14118|DAG1_HUMAN,sp|O43278|SPIT1_HUMAN,sp|P50552|VASP_HUMAN
biological_process	regulation of tube diameter	3	0.0610589	sp|P02675|FIBB_HUMAN,sp|P02679|FIBG_HUMAN,sp|P02671|FIBA_HUMAN
biological_process	regulation of protein binding	3	0.0610589	sp|P07355|ANXA2_HUMAN,sp|P61769|B2MG_HUMAN,sp|P60953|CDC42_HUMAN
biological_process	epithelial tube morphogenesis	3	0.0610589	sp|Q14118|DAG1_HUMAN,sp|O43278|SPIT1_HUMAN,sp|P50552|VASP_HUMAN
biological_process	regulation of blood vessel diameter	3	0.0610589	sp|P02675|FIBB_HUMAN,sp|P02679|FIBG_HUMAN,sp|P02671|FIBA_HUMAN
biological_process	negative regulation of secretion by cell	3	0.0610589	sp|P02652|APOA2_HUMAN,sp|P62834|RAP1A_HUMAN,sp|P02647|APOA1_HUMAN
biological_process	cellular response to organic cyclic compound	6	0.0619903	sp|Q15631|TSN_HUMAN,sp|Q9UL18|AGO1_HUMAN,sp|Q14118|DAG1_HUMAN,sp|P80108|PHLD_HUMAN,sp|O95831|AIFM1_HUMAN,sp|P62834|RAP1A_HUMAN
biological_process	biological adhesion	9	0.0626412	sp|P35579|MYH9_HUMAN,sp|Q14118|DAG1_HUMAN,sp|P02679|FIBG_HUMAN,sp|P01040|CYTA_HUMAN,sp|P02671|FIBA_HUMAN,sp|P02675|FIBB_HUMAN,sp|Q08380|LG3BP_HUMAN,sp|P68871|HBB_HUMAN,sp|P60953|CDC42_HUMAN
biological_process	detection of chemical stimulus involved in sensory perception of bitter taste	2	0.0636871	sp|P23280|CAH6_HUMAN,sp|P12273|PIP_HUMAN
biological_process	morphogenesis of a branching structure	2	0.0636871	sp|Q14118|DAG1_HUMAN,sp|O43278|SPIT1_HUMAN
biological_process	neural tube closure	2	0.0636871	sp|O43278|SPIT1_HUMAN,sp|P50552|VASP_HUMAN
biological_process	negative regulation of production of molecular mediator of immune response	2	0.0636871	sp|P02652|APOA2_HUMAN,sp|P02647|APOA1_HUMAN
biological_process	oxaloacetate metabolic process	2	0.0636871	sp|Q9NQR4|NIT2_HUMAN,sp|P40926|MDHM_HUMAN
biological_process	regulation of DNA replication	2	0.0636871	sp|P01034|CYTC_HUMAN,sp|P60953|CDC42_HUMAN
biological_process	phagocytosis, engulfment	2	0.0636871	sp|P35579|MYH9_HUMAN,sp|P60953|CDC42_HUMAN
biological_process	peripheral nervous system development	2	0.0636871	sp|Q14118|DAG1_HUMAN,sp|P35052|GPC1_HUMAN
biological_process	membrane invagination	2	0.0636871	sp|P35579|MYH9_HUMAN,sp|P60953|CDC42_HUMAN
biological_process	regulation of gliogenesis	2	0.0636871	sp|Q14118|DAG1_HUMAN,sp|O43278|SPIT1_HUMAN
biological_process	dendrite development	2	0.0636871	sp|P00492|HPRT_HUMAN,sp|P60953|CDC42_HUMAN
biological_process	posttranscriptional gene silencing	2	0.0636871	sp|Q15631|TSN_HUMAN,sp|Q9UL18|AGO1_HUMAN
biological_process	gland morphogenesis	2	0.0636871	sp|Q14118|DAG1_HUMAN,sp|P60953|CDC42_HUMAN
biological_process	establishment of cell polarity	2	0.0636871	sp|P35579|MYH9_HUMAN,sp|P60953|CDC42_HUMAN
biological_process	neuron projection regeneration	2	0.0636871	sp|Q14118|DAG1_HUMAN,sp|P02647|APOA1_HUMAN
biological_process	regulation of interleukin-1 beta production	2	0.0636871	sp|P02763|A1AG1_HUMAN,sp|P02647|APOA1_HUMAN
biological_process	phospholipid efflux	2	0.0636871	sp|P02652|APOA2_HUMAN,sp|P02647|APOA1_HUMAN
biological_process	regulation of tissue remodeling	2	0.0636871	sp|P01034|CYTC_HUMAN,sp|P00918|CAH2_HUMAN
biological_process	posttranscriptional gene silencing by RNA	2	0.0636871	sp|Q15631|TSN_HUMAN,sp|Q9UL18|AGO1_HUMAN
biological_process	multicellular organism growth	2	0.0636871	sp|P43304|GPDM_HUMAN,sp|P60953|CDC42_HUMAN
biological_process	regulation of glial cell differentiation	2	0.0636871	sp|Q14118|DAG1_HUMAN,sp|O43278|SPIT1_HUMAN
biological_process	positive regulation of steroid metabolic process	2	0.0636871	sp|P02652|APOA2_HUMAN,sp|P02647|APOA1_HUMAN
biological_process	regulation of embryonic development	2	0.0636871	sp|Q14118|DAG1_HUMAN,sp|P02647|APOA1_HUMAN
biological_process	detection of chemical stimulus involved in sensory perception	2	0.0636871	sp|P23280|CAH6_HUMAN,sp|P12273|PIP_HUMAN
biological_process	detection of chemical stimulus involved in sensory perception of taste	2	0.0636871	sp|P23280|CAH6_HUMAN,sp|P12273|PIP_HUMAN
biological_process	tube closure	2	0.0636871	sp|O43278|SPIT1_HUMAN,sp|P50552|VASP_HUMAN
biological_process	morphogenesis of a branching epithelium	2	0.0636871	sp|Q14118|DAG1_HUMAN,sp|O43278|SPIT1_HUMAN
biological_process	cellular response to dsRNA	2	0.0636871	sp|Q15631|TSN_HUMAN,sp|Q9UL18|AGO1_HUMAN
biological_process	plasma membrane invagination	2	0.0636871	sp|P35579|MYH9_HUMAN,sp|P60953|CDC42_HUMAN
biological_process	exocytic process	2	0.0636871	sp|Q9UEU0|VTI1B_HUMAN,sp|O00161|SNP23_HUMAN
biological_process	negative regulation of protein activation cascade	2	0.0636871	sp|P01023|A2MG_HUMAN,sp|P02671|FIBA_HUMAN
biological_process	wound healing	8	0.0656836	sp|P35579|MYH9_HUMAN,sp|Q14118|DAG1_HUMAN,sp|P02675|FIBB_HUMAN,sp|P02679|FIBG_HUMAN,sp|P01008|ANT3_HUMAN,sp|P01023|A2MG_HUMAN,sp|P68871|HBB_HUMAN,sp|P02671|FIBA_HUMAN
biological_process	regulation of protein catabolic process	8	0.0656836	sp|P07355|ANXA2_HUMAN,sp|P01034|CYTC_HUMAN,sp|Q99436|PSB7_HUMAN,sp|P28066|PSA5_HUMAN,sp|P80108|PHLD_HUMAN,sp|P55072|TERA_HUMAN,sp|P60953|CDC42_HUMAN,sp|P10909|CLUS_HUMAN
biological_process	regulation of exocytosis	5	0.0663402	sp|P02675|FIBB_HUMAN,sp|P02679|FIBG_HUMAN,sp|Q9UL25|RAB21_HUMAN,sp|P62834|RAP1A_HUMAN,sp|P02671|FIBA_HUMAN
biological_process	regulation of phosphorylation	12	0.0665032	sp|Q14118|DAG1_HUMAN,sp|P02679|FIBG_HUMAN,sp|O75326|SEM7A_HUMAN,sp|O75787|RENR_HUMAN,sp|P02647|APOA1_HUMAN,sp|P02671|FIBA_HUMAN,sp|P07355|ANXA2_HUMAN,sp|P02675|FIBB_HUMAN,sp|P62834|RAP1A_HUMAN,sp|P55072|TERA_HUMAN,sp|P10909|CLUS_HUMAN,sp|P60953|CDC42_HUMAN
biological_process	regulation of protein phosphorylation	11	0.0675362	sp|Q14118|DAG1_HUMAN,sp|P02679|FIBG_HUMAN,sp|O75326|SEM7A_HUMAN,sp|O75787|RENR_HUMAN,sp|P02647|APOA1_HUMAN,sp|P02671|FIBA_HUMAN,sp|P07355|ANXA2_HUMAN,sp|P02675|FIBB_HUMAN,sp|P62834|RAP1A_HUMAN,sp|P10909|CLUS_HUMAN,sp|P60953|CDC42_HUMAN
biological_process	ossification	4	0.0677671	sp|P80108|PHLD_HUMAN,sp|O75326|SEM7A_HUMAN,sp|Q16610|ECM1_HUMAN,sp|P61604|CH10_HUMAN
biological_process	regeneration	4	0.0677671	sp|Q14118|DAG1_HUMAN,sp|P02652|APOA2_HUMAN,sp|P62834|RAP1A_HUMAN,sp|P02647|APOA1_HUMAN
biological_process	negative regulation of cellular catabolic process	4	0.0677671	sp|P07355|ANXA2_HUMAN,sp|P00738|HPT_HUMAN,sp|P01034|CYTC_HUMAN,sp|P80108|PHLD_HUMAN
biological_process	transition metal ion homeostasis	4	0.0677671	sp|Q9NTM9|CUTC_HUMAN,sp|P61769|B2MG_HUMAN,sp|P00450|CERU_HUMAN,sp|P08582|TRFM_HUMAN
biological_process	innate immune response-activating signal transduction	6	0.0685478	sp|Q96DR8|MUCL1_HUMAN,sp|Q99436|PSB7_HUMAN,sp|P02675|FIBB_HUMAN,sp|P28066|PSA5_HUMAN,sp|P02679|FIBG_HUMAN,sp|P02671|FIBA_HUMAN
biological_process	regulation of vesicle-mediated transport	8	0.0710812	sp|P61769|B2MG_HUMAN,sp|P02679|FIBG_HUMAN,sp|P02671|FIBA_HUMAN,sp|P07355|ANXA2_HUMAN,sp|P02675|FIBB_HUMAN,sp|Q9UL25|RAB21_HUMAN,sp|P62834|RAP1A_HUMAN,sp|P10909|CLUS_HUMAN
biological_process	regulation of transport	17	0.0723422	sp|P61769|B2MG_HUMAN,sp|Q99436|PSB7_HUMAN,sp|P02679|FIBG_HUMAN,sp|P80108|PHLD_HUMAN,sp|P02647|APOA1_HUMAN,sp|P07355|ANXA2_HUMAN,sp|P02763|A1AG1_HUMAN,sp|O15296|LX15B_HUMAN,sp|P60953|CDC42_HUMAN,sp|P02652|APOA2_HUMAN,sp|P00918|CAH2_HUMAN,sp|P02671|FIBA_HUMAN,sp|P04406|G3P_HUMAN,sp|P02675|FIBB_HUMAN,sp|Q9UL25|RAB21_HUMAN,sp|P62834|RAP1A_HUMAN,sp|P10909|CLUS_HUMAN
biological_process	leukocyte differentiation	3	0.0737777	sp|P35579|MYH9_HUMAN,sp|P07355|ANXA2_HUMAN,sp|P61769|B2MG_HUMAN
biological_process	glycerolipid biosynthetic process	3	0.0737777	sp|P02652|APOA2_HUMAN,sp|P0C869|PA24B_HUMAN,sp|P02647|APOA1_HUMAN
biological_process	glycerophospholipid biosynthetic process	3	0.0737777	sp|P02652|APOA2_HUMAN,sp|P0C869|PA24B_HUMAN,sp|P02647|APOA1_HUMAN
biological_process	negative regulation of cellular process	31	0.0740702	sp|P61769|B2MG_HUMAN,sp|Q99436|PSB7_HUMAN,sp|P02679|FIBG_HUMAN,sp|P80108|PHLD_HUMAN,sp|Q16610|ECM1_HUMAN,sp|P01040|CYTA_HUMAN,sp|P12273|PIP_HUMAN,sp|P02647|APOA1_HUMAN,sp|P07355|ANXA2_HUMAN,sp|P28066|PSA5_HUMAN,sp|P46736|BRCC3_HUMAN,sp|Q99536|VAT1_HUMAN,sp|P35052|GPC1_HUMAN,sp|P08582|TRFM_HUMAN,sp|O15296|LX15B_HUMAN,sp|P35579|MYH9_HUMAN,sp|Q9UL18|AGO1_HUMAN,sp|Q14118|DAG1_HUMAN,sp|P02652|APOA2_HU…
biological_process	organophosphate metabolic process	14	0.0742993	sp|Q3MJ16|PA24E_HUMAN,sp|P02652|APOA2_HUMAN,sp|P43304|GPDM_HUMAN,sp|P80108|PHLD_HUMAN,sp|P0C869|PA24B_HUMAN,sp|P40926|MDHM_HUMAN,sp|P06732|KCRM_HUMAN,sp|P00492|HPRT_HUMAN,sp|P02647|APOA1_HUMAN,sp|P04406|G3P_HUMAN,sp|O75874|IDHC_HUMAN,sp|P06737|PYGL_HUMAN,sp|P07195|LDHB_HUMAN,sp|P55072|TERA_HUMAN
biological_process	morphogenesis of an epithelium	5	0.0743144	sp|Q14118|DAG1_HUMAN,sp|P00918|CAH2_HUMAN,sp|O43278|SPIT1_HUMAN,sp|P50552|VASP_HUMAN,sp|P60953|CDC42_HUMAN
biological_process	protein complex assembly	15	0.0752472	sp|Q719H9|KCTD1_HUMAN,sp|P02679|FIBG_HUMAN,sp|O00161|SNP23_HUMAN,sp|P50552|VASP_HUMAN,sp|P00492|HPRT_HUMAN,sp|P02671|FIBA_HUMAN,sp|Q9NTM9|CUTC_HUMAN,sp|P07355|ANXA2_HUMAN,sp|P02675|FIBB_HUMAN,sp|O95831|AIFM1_HUMAN,sp|P55072|TERA_HUMAN,sp|P50990|TCPQ_HUMAN,sp|P68871|HBB_HUMAN,sp|P10909|CLUS_HUMAN,sp|P69905|HBA_HUMAN
biological_process	protein complex biogenesis	15	0.0752472	sp|Q719H9|KCTD1_HUMAN,sp|P02679|FIBG_HUMAN,sp|O00161|SNP23_HUMAN,sp|P50552|VASP_HUMAN,sp|P00492|HPRT_HUMAN,sp|P02671|FIBA_HUMAN,sp|Q9NTM9|CUTC_HUMAN,sp|P07355|ANXA2_HUMAN,sp|P02675|FIBB_HUMAN,sp|O95831|AIFM1_HUMAN,sp|P55072|TERA_HUMAN,sp|P50990|TCPQ_HUMAN,sp|P68871|HBB_HUMAN,sp|P10909|CLUS_HUMAN,sp|P69905|HBA_HUMAN
biological_process	nervous system development	16	0.0757254	sp|P61769|B2MG_HUMAN,sp|P50552|VASP_HUMAN,sp|P02647|APOA1_HUMAN,sp|P35052|GPC1_HUMAN,sp|P60953|CDC42_HUMAN,sp|P01034|CYTC_HUMAN,sp|Q14118|DAG1_HUMAN,sp|O75326|SEM7A_HUMAN,sp|O75787|RENR_HUMAN,sp|P00492|HPRT_HUMAN,sp|O43278|SPIT1_HUMAN,sp|Q9H190|SDCB2_HUMAN,sp|Q9UL25|RAB21_HUMAN,sp|P62834|RAP1A_HUMAN,sp|O95831|AIFM1_HUMAN,sp|P10909|CLUS_HUMAN
biological_process	response to organic cyclic compound	10	0.0775059	sp|Q9UL18|AGO1_HUMAN,sp|Q14118|DAG1_HUMAN,sp|P02652|APOA2_HUMAN,sp|P01034|CYTC_HUMAN,sp|P00918|CAH2_HUMAN,sp|P80108|PHLD_HUMAN,sp|Q15631|TSN_HUMAN,sp|O75874|IDHC_HUMAN,sp|P62834|RAP1A_HUMAN,sp|O95831|AIFM1_HUMAN
biological_process	chemotaxis	4	0.0776751	sp|Q14118|DAG1_HUMAN,sp|O75326|SEM7A_HUMAN,sp|P35052|GPC1_HUMAN,sp|P50552|VASP_HUMAN
biological_process	response to carbohydrate	4	0.0776751	sp|P02652|APOA2_HUMAN,sp|P01034|CYTC_HUMAN,sp|P80108|PHLD_HUMAN,sp|P62834|RAP1A_HUMAN
biological_process	NAD metabolic process	4	0.0776751	sp|P43304|GPDM_HUMAN,sp|P07195|LDHB_HUMAN,sp|P55072|TERA_HUMAN,sp|P40926|MDHM_HUMAN
biological_process	positive regulation of intracellular transport	4	0.0776751	sp|P07355|ANXA2_HUMAN,sp|Q99436|PSB7_HUMAN,sp|Q9UL25|RAB21_HUMAN,sp|P60953|CDC42_HUMAN
biological_process	taxis	4	0.0776751	sp|Q14118|DAG1_HUMAN,sp|O75326|SEM7A_HUMAN,sp|P35052|GPC1_HUMAN,sp|P50552|VASP_HUMAN
biological_process	biological regulation	64	0.0802208	sp|P01040|CYTA_HUMAN,sp|O75874|IDHC_HUMAN,sp|P35052|GPC1_HUMAN,sp|P08582|TRFM_HUMAN,sp|O15296|LX15B_HUMAN,sp|O75326|SEM7A_HUMAN,sp|P0C869|PA24B_HUMAN,sp|O75787|RENR_HUMAN,sp|P02671|FIBA_HUMAN,sp|P02545|LMNA_HUMAN,sp|Q9NTM9|CUTC_HUMAN,sp|P04406|G3P_HUMAN,sp|P00738|HPT_HUMAN,sp|Q08380|LG3BP_HUMAN,sp|P62834|RAP1A_HUMAN,sp|P10909|CLUS_HUMAN,sp|Q9UEU0|VTI1B_HUMAN,sp|O75531|BAF_HUMAN,sp|Q16610|ECM1_HUM…
biological_process	multicellular organism development	36	0.0803349	sp|P80108|PHLD_HUMAN,sp|P01040|CYTA_HUMAN,sp|P07355|ANXA2_HUMAN,sp|O75874|IDHC_HUMAN,sp|P35052|GPC1_HUMAN,sp|O15296|LX15B_HUMAN,sp|P35579|MYH9_HUMAN,sp|P02652|APOA2_HUMAN,sp|P01034|CYTC_HUMAN,sp|O75326|SEM7A_HUMAN,sp|O75787|RENR_HUMAN,sp|P02545|LMNA_HUMAN,sp|P19012|K1C15_HUMAN,sp|P62834|RAP1A_HUMAN,sp|Q9UHW9|S12A6_HUMAN,sp|P10909|CLUS_HUMAN,sp|P61769|B2MG_HUMAN,sp|P43304|GPDM_HUMAN,sp|Q16610|ECM1…
biological_process	regulation of peptidase activity	7	0.0804135	sp|P01034|CYTC_HUMAN,sp|Q16610|ECM1_HUMAN,sp|O95831|AIFM1_HUMAN,sp|P61604|CH10_HUMAN,sp|P01040|CYTA_HUMAN,sp|P55072|TERA_HUMAN,sp|P35237|SPB6_HUMAN
biological_process	positive regulation of cellular biosynthetic process	10	0.0825965	sp|Q9UL18|AGO1_HUMAN,sp|P02652|APOA2_HUMAN,sp|P01034|CYTC_HUMAN,sp|P80108|PHLD_HUMAN,sp|P02545|LMNA_HUMAN,sp|P55072|TERA_HUMAN,sp|P68871|HBB_HUMAN,sp|P50990|TCPQ_HUMAN,sp|P10909|CLUS_HUMAN,sp|P60953|CDC42_HUMAN
biological_process	response to topologically incorrect protein	5	0.0827916	sp|P0C869|PA24B_HUMAN,sp|P61604|CH10_HUMAN,sp|P55072|TERA_HUMAN,sp|P10909|CLUS_HUMAN,sp|P02545|LMNA_HUMAN
biological_process	negative regulation of hydrolase activity	6	0.0828366	sp|P02652|APOA2_HUMAN,sp|P01034|CYTC_HUMAN,sp|Q16610|ECM1_HUMAN,sp|P01040|CYTA_HUMAN,sp|P35237|SPB6_HUMAN,sp|P02647|APOA1_HUMAN
biological_process	embryonic epithelial tube formation	2	0.0850636	sp|O43278|SPIT1_HUMAN,sp|P50552|VASP_HUMAN
biological_process	neural tube formation	2	0.0850636	sp|O43278|SPIT1_HUMAN,sp|P50552|VASP_HUMAN
biological_process	myeloid leukocyte differentiation	2	0.0850636	sp|P35579|MYH9_HUMAN,sp|P07355|ANXA2_HUMAN
biological_process	positive regulation of production of molecular mediator of immune response	2	0.0850636	sp|P61769|B2MG_HUMAN,sp|O75326|SEM7A_HUMAN
biological_process	response to pH	2	0.0850636	sp|P00918|CAH2_HUMAN,sp|P80108|PHLD_HUMAN
biological_process	positive regulation of protein processing	2	0.0850636	sp|P35579|MYH9_HUMAN,sp|P08582|TRFM_HUMAN
biological_process	primary neural tube formation	2	0.0850636	sp|O43278|SPIT1_HUMAN,sp|P50552|VASP_HUMAN
biological_process	arachidonic acid metabolic process	2	0.0850636	sp|P0C869|PA24B_HUMAN,sp|O15296|LX15B_HUMAN
biological_process	developmental maturation	2	0.0850636	sp|Q14118|DAG1_HUMAN,sp|P02679|FIBG_HUMAN
biological_process	gene silencing by RNA	2	0.0850636	sp|Q15631|TSN_HUMAN,sp|Q9UL18|AGO1_HUMAN
biological_process	positive regulation of proteasomal ubiquitin-dependent protein catabolic process	2	0.0850636	sp|P55072|TERA_HUMAN,sp|P10909|CLUS_HUMAN
biological_process	positive regulation of tumor necrosis factor production	2	0.0850636	sp|P02763|A1AG1_HUMAN,sp|P10909|CLUS_HUMAN
biological_process	membrane protein proteolysis	2	0.0850636	sp|P35579|MYH9_HUMAN,sp|Q14118|DAG1_HUMAN
biological_process	plasma lipoprotein particle assembly	2	0.0850636	sp|P02652|APOA2_HUMAN,sp|P02647|APOA1_HUMAN
biological_process	tube formation	2	0.0850636	sp|O43278|SPIT1_HUMAN,sp|P50552|VASP_HUMAN
biological_process	phosphatidylcholine acyl-chain remodeling	2	0.0850636	sp|Q3MJ16|PA24E_HUMAN,sp|P0C869|PA24B_HUMAN
biological_process	response to dsRNA	2	0.0850636	sp|Q15631|TSN_HUMAN,sp|Q9UL18|AGO1_HUMAN
biological_process	regulation of muscle adaptation	2	0.0850636	sp|Q14118|DAG1_HUMAN,sp|P02545|LMNA_HUMAN
biological_process	modification by symbiont of host morphology or physiology	2	0.0850636	sp|P04406|G3P_HUMAN,sp|Q14118|DAG1_HUMAN
biological_process	synaptic vesicle transport	2	0.0850636	sp|Q96CW1|AP2M1_HUMAN,sp|O00161|SNP23_HUMAN
biological_process	regulation of interleukin-1 secretion	2	0.0850636	sp|P02763|A1AG1_HUMAN,sp|P02647|APOA1_HUMAN
biological_process	sensory perception of bitter taste	2	0.0850636	sp|P23280|CAH6_HUMAN,sp|P12273|PIP_HUMAN
biological_process	negative regulation of lipase activity	2	0.0850636	sp|P02652|APOA2_HUMAN,sp|P02647|APOA1_HUMAN
biological_process	protein-lipid complex assembly	2	0.0850636	sp|P02652|APOA2_HUMAN,sp|P02647|APOA1_HUMAN
biological_process	epithelial tube formation	2	0.0850636	sp|O43278|SPIT1_HUMAN,sp|P50552|VASP_HUMAN
biological_process	synaptic vesicle localization	2	0.0850636	sp|Q96CW1|AP2M1_HUMAN,sp|O00161|SNP23_HUMAN
biological_process	establishment of synaptic vesicle localization	2	0.0850636	sp|Q96CW1|AP2M1_HUMAN,sp|O00161|SNP23_HUMAN
biological_process	positive regulation of protein maturation	2	0.0850636	sp|P35579|MYH9_HUMAN,sp|P08582|TRFM_HUMAN
biological_process	positive regulation of tumor necrosis factor superfamily cytokine production	2	0.0850636	sp|P02763|A1AG1_HUMAN,sp|P10909|CLUS_HUMAN
biological_process	regulation of protein modification process	14	0.0866326	sp|Q14118|DAG1_HUMAN,sp|Q99436|PSB7_HUMAN,sp|P02679|FIBG_HUMAN,sp|O75326|SEM7A_HUMAN,sp|O75787|RENR_HUMAN,sp|P02647|APOA1_HUMAN,sp|P02671|FIBA_HUMAN,sp|P07355|ANXA2_HUMAN,sp|P02675|FIBB_HUMAN,sp|P28066|PSA5_HUMAN,sp|P62834|RAP1A_HUMAN,sp|P55072|TERA_HUMAN,sp|P10909|CLUS_HUMAN,sp|P60953|CDC42_HUMAN
biological_process	neuron development	7	0.0871528	sp|Q14118|DAG1_HUMAN,sp|O75326|SEM7A_HUMAN,sp|P35052|GPC1_HUMAN,sp|P50552|VASP_HUMAN,sp|P00492|HPRT_HUMAN,sp|P60953|CDC42_HUMAN,sp|P02647|APOA1_HUMAN
biological_process	NADH metabolic process	3	0.0875713	sp|P43304|GPDM_HUMAN,sp|P55072|TERA_HUMAN,sp|P40926|MDHM_HUMAN
biological_process	establishment or maintenance of cell polarity	3	0.0875713	sp|P35579|MYH9_HUMAN,sp|P60953|CDC42_HUMAN,sp|P02545|LMNA_HUMAN
biological_process	unsaturated fatty acid metabolic process	3	0.0875713	sp|P0C869|PA24B_HUMAN,sp|A1L3X0|ELOV7_HUMAN,sp|O15296|LX15B_HUMAN
biological_process	negative regulation of cellular amide metabolic process	3	0.0875713	sp|Q9UL18|AGO1_HUMAN,sp|P04406|G3P_HUMAN,sp|P10909|CLUS_HUMAN
biological_process	negative regulation of secretion	3	0.0875713	sp|P02652|APOA2_HUMAN,sp|P62834|RAP1A_HUMAN,sp|P02647|APOA1_HUMAN
biological_process	chaperone-mediated protein folding	3	0.0875713	sp|P61604|CH10_HUMAN,sp|P50990|TCPQ_HUMAN,sp|P10909|CLUS_HUMAN
biological_process	regulation of protein activation cascade	3	0.0875713	sp|P01008|ANT3_HUMAN,sp|P01023|A2MG_HUMAN,sp|P02671|FIBA_HUMAN
biological_process	positive regulation of immune response	10	0.0878915	sp|Q96DR8|MUCL1_HUMAN,sp|P61769|B2MG_HUMAN,sp|Q99436|PSB7_HUMAN,sp|P02679|FIBG_HUMAN,sp|P80108|PHLD_HUMAN,sp|O75326|SEM7A_HUMAN,sp|P02671|FIBA_HUMAN,sp|P28066|PSA5_HUMAN,sp|P02675|FIBB_HUMAN,sp|P62834|RAP1A_HUMAN
biological_process	macromolecular complex assembly	18	0.0900395	sp|P02679|FIBG_HUMAN,sp|O00161|SNP23_HUMAN,sp|P50552|VASP_HUMAN,sp|P02647|APOA1_HUMAN,sp|P07355|ANXA2_HUMAN,sp|P55072|TERA_HUMAN,sp|P50990|TCPQ_HUMAN,sp|Q9UL18|AGO1_HUMAN,sp|P02652|APOA2_HUMAN,sp|Q719H9|KCTD1_HUMAN,sp|P02671|FIBA_HUMAN,sp|P00492|HPRT_HUMAN,sp|Q9NTM9|CUTC_HUMAN,sp|P02675|FIBB_HUMAN,sp|O95831|AIFM1_HUMAN,sp|P68871|HBB_HUMAN,sp|P10909|CLUS_HUMAN,sp|P69905|HBA_HUMAN
biological_process	activation of innate immune response	6	0.0905639	sp|Q96DR8|MUCL1_HUMAN,sp|Q99436|PSB7_HUMAN,sp|P02675|FIBB_HUMAN,sp|P28066|PSA5_HUMAN,sp|P02679|FIBG_HUMAN,sp|P02671|FIBA_HUMAN
biological_process	regulation of protein stability	6	0.0905639	sp|P04406|G3P_HUMAN,sp|P02652|APOA2_HUMAN,sp|P50990|TCPQ_HUMAN,sp|P60953|CDC42_HUMAN,sp|P02647|APOA1_HUMAN,sp|P10909|CLUS_HUMAN
biological_process	phospholipid metabolic process	5	0.0917641	sp|Q3MJ16|PA24E_HUMAN,sp|P02652|APOA2_HUMAN,sp|P80108|PHLD_HUMAN,sp|P0C869|PA24B_HUMAN,sp|P02647|APOA1_HUMAN
biological_process	protein maturation	5	0.0917641	sp|P02675|FIBB_HUMAN,sp|P02679|FIBG_HUMAN,sp|P16870|CBPE_HUMAN,sp|O75787|RENR_HUMAN,sp|P02671|FIBA_HUMAN
biological_process	negative regulation of cell communication	12	0.0934316	sp|Q14118|DAG1_HUMAN,sp|Q99436|PSB7_HUMAN,sp|P02679|FIBG_HUMAN,sp|Q16610|ECM1_HUMAN,sp|P02647|APOA1_HUMAN,sp|P02545|LMNA_HUMAN,sp|P02671|FIBA_HUMAN,sp|P28066|PSA5_HUMAN,sp|P02675|FIBB_HUMAN,sp|P35052|GPC1_HUMAN,sp|P62834|RAP1A_HUMAN,sp|P10909|CLUS_HUMAN
biological_process	cell differentiation	28	0.0935078	sp|P61769|B2MG_HUMAN,sp|P02679|FIBG_HUMAN,sp|P80108|PHLD_HUMAN,sp|P01040|CYTA_HUMAN,sp|P50552|VASP_HUMAN,sp|P02647|APOA1_HUMAN,sp|P07355|ANXA2_HUMAN,sp|Q9NSB4|KRT82_HUMAN,sp|P35052|GPC1_HUMAN,sp|Q92764|KRT35_HUMAN,sp|Q6A163|K1C39_HUMAN,sp|P60953|CDC42_HUMAN,sp|P35579|MYH9_HUMAN,sp|Q14118|DAG1_HUMAN,sp|P01034|CYTC_HUMAN,sp|O75326|SEM7A_HUMAN,sp|P01023|A2MG_HUMAN,sp|P61604|CH10_HUMAN,sp|O43278|SPIT…
biological_process	negative regulation of protein metabolic process	13	0.0948282	sp|Q9UL18|AGO1_HUMAN,sp|Q14118|DAG1_HUMAN,sp|P01034|CYTC_HUMAN,sp|Q99436|PSB7_HUMAN,sp|Q16610|ECM1_HUMAN,sp|P01023|A2MG_HUMAN,sp|P01040|CYTA_HUMAN,sp|P02671|FIBA_HUMAN,sp|P07355|ANXA2_HUMAN,sp|P04406|G3P_HUMAN,sp|P28066|PSA5_HUMAN,sp|P35237|SPB6_HUMAN,sp|P10909|CLUS_HUMAN
biological_process	regulation of body fluid levels	8	0.0953464	sp|P35579|MYH9_HUMAN,sp|P07355|ANXA2_HUMAN,sp|P02675|FIBB_HUMAN,sp|P02679|FIBG_HUMAN,sp|P01008|ANT3_HUMAN,sp|P01023|A2MG_HUMAN,sp|P68871|HBB_HUMAN,sp|P02671|FIBA_HUMAN
biological_process	positive regulation of cell communication	16	0.0954758	sp|Q99436|PSB7_HUMAN,sp|P02679|FIBG_HUMAN,sp|P80108|PHLD_HUMAN,sp|Q16610|ECM1_HUMAN,sp|P02647|APOA1_HUMAN,sp|P28066|PSA5_HUMAN,sp|O15296|LX15B_HUMAN,sp|P60953|CDC42_HUMAN,sp|Q9UL18|AGO1_HUMAN,sp|O75326|SEM7A_HUMAN,sp|P00918|CAH2_HUMAN,sp|O75787|RENR_HUMAN,sp|P02671|FIBA_HUMAN,sp|P26447|S10A4_HUMAN,sp|P02675|FIBB_HUMAN,sp|P62834|RAP1A_HUMAN
biological_process	regulation of multicellular organismal development	16	0.0954758	sp|P61769|B2MG_HUMAN,sp|Q99436|PSB7_HUMAN,sp|Q16610|ECM1_HUMAN,sp|P02647|APOA1_HUMAN,sp|P28066|PSA5_HUMAN,sp|P35052|GPC1_HUMAN,sp|O15296|LX15B_HUMAN,sp|P60953|CDC42_HUMAN,sp|Q9UL18|AGO1_HUMAN,sp|Q14118|DAG1_HUMAN,sp|O75326|SEM7A_HUMAN,sp|P00918|CAH2_HUMAN,sp|Q96CW1|AP2M1_HUMAN,sp|O43278|SPIT1_HUMAN,sp|Q9UL25|RAB21_HUMAN,sp|P62834|RAP1A_HUMAN
biological_process	regulation of intracellular signal transduction	14	0.0955533	sp|Q9UL18|AGO1_HUMAN,sp|Q14118|DAG1_HUMAN,sp|P02679|FIBG_HUMAN,sp|O75326|SEM7A_HUMAN,sp|Q16610|ECM1_HUMAN,sp|O75787|RENR_HUMAN,sp|P01023|A2MG_HUMAN,sp|P02647|APOA1_HUMAN,sp|P02671|FIBA_HUMAN,sp|P26447|S10A4_HUMAN,sp|P02675|FIBB_HUMAN,sp|P62834|RAP1A_HUMAN,sp|P10909|CLUS_HUMAN,sp|P60953|CDC42_HUMAN
biological_process	negative regulation of signaling	12	0.098499	sp|Q14118|DAG1_HUMAN,sp|Q99436|PSB7_HUMAN,sp|P02679|FIBG_HUMAN,sp|Q16610|ECM1_HUMAN,sp|P02647|APOA1_HUMAN,sp|P02545|LMNA_HUMAN,sp|P02671|FIBA_HUMAN,sp|P28066|PSA5_HUMAN,sp|P02675|FIBB_HUMAN,sp|P35052|GPC1_HUMAN,sp|P62834|RAP1A_HUMAN,sp|P10909|CLUS_HUMAN
biological_process	regulation of lipid metabolic process	6	0.0986744	sp|P02652|APOA2_HUMAN,sp|P01011|AACT_HUMAN,sp|O75874|IDHC_HUMAN,sp|P80108|PHLD_HUMAN,sp|P60953|CDC42_HUMAN,sp|P02647|APOA1_HUMAN
biological_process	cellular protein complex assembly	6	0.0986744	sp|P02675|FIBB_HUMAN,sp|P02679|FIBG_HUMAN,sp|O95831|AIFM1_HUMAN,sp|O00161|SNP23_HUMAN,sp|P10909|CLUS_HUMAN,sp|P02671|FIBA_HUMAN
biological_process	positive regulation of cellular component biogenesis	6	0.0986744	sp|Q14118|DAG1_HUMAN,sp|P55072|TERA_HUMAN,sp|P50552|VASP_HUMAN,sp|P60953|CDC42_HUMAN,sp|P02647|APOA1_HUMAN,sp|P10909|CLUS_HUMAN
biological_process	negative regulation of metabolic process	20	0.0988765	sp|Q99436|PSB7_HUMAN,sp|P80108|PHLD_HUMAN,sp|Q16610|ECM1_HUMAN,sp|P01040|CYTA_HUMAN,sp|Q15631|TSN_HUMAN,sp|P07355|ANXA2_HUMAN,sp|P28066|PSA5_HUMAN,sp|P60953|CDC42_HUMAN,sp|Q9UL18|AGO1_HUMAN,sp|Q14118|DAG1_HUMAN,sp|P01034|CYTC_HUMAN,sp|P02652|APOA2_HUMAN,sp|Q719H9|KCTD1_HUMAN,sp|P01023|A2MG_HUMAN,sp|P02671|FIBA_HUMAN,sp|P00738|HPT_HUMAN,sp|P04406|G3P_HUMAN,sp|P62834|RAP1A_HUMAN,sp|P10909|CLUS_HUMA…
biological_process	energy derivation by oxidation of organic compounds	4	0.0995297	sp|O75874|IDHC_HUMAN,sp|P43304|GPDM_HUMAN,sp|P06737|PYGL_HUMAN,sp|P40926|MDHM_HUMAN
biological_process	developmental growth	4	0.0995297	sp|Q14118|DAG1_HUMAN,sp|P43304|GPDM_HUMAN,sp|O75326|SEM7A_HUMAN,sp|P60953|CDC42_HUMAN
biological_process	regulation of cell adhesion	7	0.101578	sp|Q14118|DAG1_HUMAN,sp|P02675|FIBB_HUMAN,sp|P02679|FIBG_HUMAN,sp|P08582|TRFM_HUMAN,sp|P60953|CDC42_HUMAN,sp|P02647|APOA1_HUMAN,sp|P02671|FIBA_HUMAN
biological_process	regulation of hydrolase activity	11	0.101938	sp|P02652|APOA2_HUMAN,sp|P01034|CYTC_HUMAN,sp|P80108|PHLD_HUMAN,sp|Q16610|ECM1_HUMAN,sp|P61604|CH10_HUMAN,sp|P01040|CYTA_HUMAN,sp|P02647|APOA1_HUMAN,sp|P62834|RAP1A_HUMAN,sp|O95831|AIFM1_HUMAN,sp|P55072|TERA_HUMAN,sp|P35237|SPB6_HUMAN
biological_process	response to hexose	3	0.102365	sp|P02652|APOA2_HUMAN,sp|P80108|PHLD_HUMAN,sp|P62834|RAP1A_HUMAN
biological_process	response to glucose	3	0.102365	sp|P02652|APOA2_HUMAN,sp|P80108|PHLD_HUMAN,sp|P62834|RAP1A_HUMAN
biological_process	glial cell differentiation	3	0.102365	sp|Q14118|DAG1_HUMAN,sp|P35052|GPC1_HUMAN,sp|P10909|CLUS_HUMAN
biological_process	lipoprotein biosynthetic process	3	0.102365	sp|P80108|PHLD_HUMAN,sp|P08582|TRFM_HUMAN,sp|P02647|APOA1_HUMAN
biological_process	dicarboxylic acid metabolic process	3	0.102365	sp|O75874|IDHC_HUMAN,sp|Q9NQR4|NIT2_HUMAN,sp|P40926|MDHM_HUMAN
biological_process	regulation of myeloid cell differentiation	3	0.102365	sp|Q9UL18|AGO1_HUMAN,sp|P61769|B2MG_HUMAN,sp|P00918|CAH2_HUMAN
biological_process	regulation of lipid localization	3	0.102365	sp|P07355|ANXA2_HUMAN,sp|P02652|APOA2_HUMAN,sp|P02647|APOA1_HUMAN
biological_process	myeloid leukocyte activation	19	0.104606	sp|Q99436|PSB7_HUMAN,sp|Q9NQR4|NIT2_HUMAN,sp|O00161|SNP23_HUMAN,sp|P07355|ANXA2_HUMAN,sp|O75874|IDHC_HUMAN,sp|P28066|PSA5_HUMAN,sp|Q99536|VAT1_HUMAN,sp|P02763|A1AG1_HUMAN,sp|P50990|TCPQ_HUMAN,sp|P30740|ILEU_HUMAN,sp|P01011|AACT_HUMAN,sp|P01034|CYTC_HUMAN,sp|O75787|RENR_HUMAN,sp|P00738|HPT_HUMAN,sp|P06737|PYGL_HUMAN,sp|P62834|RAP1A_HUMAN,sp|P68871|HBB_HUMAN,sp|P10909|CLUS_HUMAN,sp|P35237|SPB6_HUMAN
biological_process	positive regulation of biosynthetic process	10	0.105005	sp|Q9UL18|AGO1_HUMAN,sp|P02652|APOA2_HUMAN,sp|P01034|CYTC_HUMAN,sp|P80108|PHLD_HUMAN,sp|P02545|LMNA_HUMAN,sp|P55072|TERA_HUMAN,sp|P68871|HBB_HUMAN,sp|P50990|TCPQ_HUMAN,sp|P10909|CLUS_HUMAN,sp|P60953|CDC42_HUMAN
biological_process	regulation of biological process	60	0.106974	sp|Q99436|PSB7_HUMAN,sp|P80108|PHLD_HUMAN,sp|P01040|CYTA_HUMAN,sp|P12273|PIP_HUMAN,sp|P07355|ANXA2_HUMAN,sp|O75874|IDHC_HUMAN,sp|P35052|GPC1_HUMAN,sp|P02763|A1AG1_HUMAN,sp|P08582|TRFM_HUMAN,sp|O15296|LX15B_HUMAN,sp|P35579|MYH9_HUMAN,sp|P02652|APOA2_HUMAN,sp|P01034|CYTC_HUMAN,sp|P01011|AACT_HUMAN,sp|O75326|SEM7A_HUMAN,sp|P0C869|PA24B_HUMAN,sp|O75787|RENR_HUMAN,sp|P02671|FIBA_HUMAN,sp|P02545|LMNA_H…
biological_process	positive regulation of hydrolase activity	6	0.107163	sp|P80108|PHLD_HUMAN,sp|O95831|AIFM1_HUMAN,sp|P61604|CH10_HUMAN,sp|P62834|RAP1A_HUMAN,sp|P55072|TERA_HUMAN,sp|P02647|APOA1_HUMAN
biological_process	positive regulation of immune system process	11	0.107585	sp|Q96DR8|MUCL1_HUMAN,sp|P61769|B2MG_HUMAN,sp|Q99436|PSB7_HUMAN,sp|P00918|CAH2_HUMAN,sp|P02679|FIBG_HUMAN,sp|P80108|PHLD_HUMAN,sp|O75326|SEM7A_HUMAN,sp|P02671|FIBA_HUMAN,sp|P28066|PSA5_HUMAN,sp|P02675|FIBB_HUMAN,sp|P62834|RAP1A_HUMAN
biological_process	negative regulation of cytokine-mediated signaling pathway	2	0.108236	sp|Q16610|ECM1_HUMAN,sp|P02647|APOA1_HUMAN
biological_process	tricarboxylic acid cycle	2	0.108236	sp|O75874|IDHC_HUMAN,sp|P40926|MDHM_HUMAN
biological_process	unsaturated fatty acid biosynthetic process	2	0.108236	sp|A1L3X0|ELOV7_HUMAN,sp|O15296|LX15B_HUMAN
biological_process	response to osmotic stress	2	0.108236	sp|Q9UHW9|S12A6_HUMAN,sp|P35237|SPB6_HUMAN
biological_process	negative regulation of mitochondrion organization	2	0.108236	sp|Q99536|VAT1_HUMAN,sp|P02545|LMNA_HUMAN
biological_process	morphogenesis of embryonic epithelium	2	0.108236	sp|O43278|SPIT1_HUMAN,sp|P50552|VASP_HUMAN
biological_process	macromolecular complex remodeling	2	0.108236	sp|P02652|APOA2_HUMAN,sp|P02647|APOA1_HUMAN
biological_process	protein-lipid complex remodeling	2	0.108236	sp|P02652|APOA2_HUMAN,sp|P02647|APOA1_HUMAN
biological_process	plasma lipoprotein particle remodeling	2	0.108236	sp|P02652|APOA2_HUMAN,sp|P02647|APOA1_HUMAN
biological_process	positive regulation of nitric oxide biosynthetic process	2	0.108236	sp|P68871|HBB_HUMAN,sp|P10909|CLUS_HUMAN
biological_process	negative regulation of cytokine secretion	2	0.108236	sp|P02652|APOA2_HUMAN,sp|P02647|APOA1_HUMAN
biological_process	detection of stimulus involved in sensory perception	2	0.108236	sp|P23280|CAH6_HUMAN,sp|P12273|PIP_HUMAN
biological_process	negative regulation of response to cytokine stimulus	2	0.108236	sp|Q16610|ECM1_HUMAN,sp|P02647|APOA1_HUMAN
biological_process	cellular response to alcohol	2	0.108236	sp|Q14118|DAG1_HUMAN,sp|P80108|PHLD_HUMAN
biological_process	positive regulation of proteasomal protein catabolic process	2	0.108236	sp|P55072|TERA_HUMAN,sp|P10909|CLUS_HUMAN
biological_process	positive regulation of nitric oxide metabolic process	2	0.108236	sp|P68871|HBB_HUMAN,sp|P10909|CLUS_HUMAN
biological_process	immune response-activating signal transduction	7	0.109257	sp|Q96DR8|MUCL1_HUMAN,sp|Q99436|PSB7_HUMAN,sp|P02675|FIBB_HUMAN,sp|P28066|PSA5_HUMAN,sp|P02679|FIBG_HUMAN,sp|P80108|PHLD_HUMAN,sp|P02671|FIBA_HUMAN
biological_process	response to reactive oxygen species	5	0.111153	sp|P00738|HPT_HUMAN,sp|P01034|CYTC_HUMAN,sp|O95831|AIFM1_HUMAN,sp|P68871|HBB_HUMAN,sp|P69905|HBA_HUMAN
biological_process	regulation of response to stress	15	0.114484	sp|Q96DR8|MUCL1_HUMAN,sp|Q99436|PSB7_HUMAN,sp|P02679|FIBG_HUMAN,sp|O75326|SEM7A_HUMAN,sp|P01008|ANT3_HUMAN,sp|P01023|A2MG_HUMAN,sp|P02647|APOA1_HUMAN,sp|P02545|LMNA_HUMAN,sp|P02671|FIBA_HUMAN,sp|P07355|ANXA2_HUMAN,sp|P02675|FIBB_HUMAN,sp|P46736|BRCC3_HUMAN,sp|P28066|PSA5_HUMAN,sp|P10909|CLUS_HUMAN,sp|P60953|CDC42_HUMAN
biological_process	negative regulation of cellular component organization	8	0.116339	sp|P61769|B2MG_HUMAN,sp|P02652|APOA2_HUMAN,sp|P01034|CYTC_HUMAN,sp|P02647|APOA1_HUMAN,sp|P02545|LMNA_HUMAN,sp|Q99536|VAT1_HUMAN,sp|P08582|TRFM_HUMAN,sp|P10909|CLUS_HUMAN
biological_process	regulation of innate immune response	7	0.117243	sp|Q96DR8|MUCL1_HUMAN,sp|Q99436|PSB7_HUMAN,sp|P02675|FIBB_HUMAN,sp|P28066|PSA5_HUMAN,sp|P02679|FIBG_HUMAN,sp|P01023|A2MG_HUMAN,sp|P02671|FIBA_HUMAN
biological_process	negative regulation of immune effector process	3	0.11808	sp|P02652|APOA2_HUMAN,sp|P01023|A2MG_HUMAN,sp|P02647|APOA1_HUMAN
biological_process	positive regulation of immune effector process	3	0.11808	sp|P61769|B2MG_HUMAN,sp|O75326|SEM7A_HUMAN,sp|P62834|RAP1A_HUMAN
biological_process	phospholipid biosynthetic process	3	0.11808	sp|P02652|APOA2_HUMAN,sp|P0C869|PA24B_HUMAN,sp|P02647|APOA1_HUMAN
biological_process	protein import	3	0.11808	sp|Q14118|DAG1_HUMAN,sp|P10909|CLUS_HUMAN,sp|P02545|LMNA_HUMAN
biological_process	positive regulation of cysteine-type endopeptidase activity involved in apoptotic process	3	0.11808	sp|O95831|AIFM1_HUMAN,sp|P61604|CH10_HUMAN,sp|P55072|TERA_HUMAN
biological_process	negative regulation of immune response	3	0.11808	sp|P02652|APOA2_HUMAN,sp|P01023|A2MG_HUMAN,sp|P02647|APOA1_HUMAN
biological_process	protein heterooligomerization	3	0.11808	sp|P07355|ANXA2_HUMAN,sp|P68871|HBB_HUMAN,sp|P69905|HBA_HUMAN
biological_process	iron ion homeostasis	3	0.11808	sp|P61769|B2MG_HUMAN,sp|P00450|CERU_HUMAN,sp|P08582|TRFM_HUMAN
biological_process	regulation of plasma lipoprotein particle levels	3	0.11808	sp|P02652|APOA2_HUMAN,sp|Q96CW1|AP2M1_HUMAN,sp|P02647|APOA1_HUMAN
biological_process	positive regulation of cysteine-type endopeptidase activity	3	0.11808	sp|O95831|AIFM1_HUMAN,sp|P61604|CH10_HUMAN,sp|P55072|TERA_HUMAN
biological_process	glycerolipid metabolic process	5	0.121542	sp|Q3MJ16|PA24E_HUMAN,sp|P02652|APOA2_HUMAN,sp|P80108|PHLD_HUMAN,sp|P0C869|PA24B_HUMAN,sp|P02647|APOA1_HUMAN
biological_process	regulation of cell death	16	0.123227	sp|P02679|FIBG_HUMAN,sp|P80108|PHLD_HUMAN,sp|P12273|PIP_HUMAN,sp|P55072|TERA_HUMAN,sp|P60953|CDC42_HUMAN,sp|P01034|CYTC_HUMAN,sp|P61604|CH10_HUMAN,sp|P02671|FIBA_HUMAN,sp|P02545|LMNA_HUMAN,sp|P00738|HPT_HUMAN,sp|P04406|G3P_HUMAN,sp|P02675|FIBB_HUMAN,sp|O95831|AIFM1_HUMAN,sp|P68871|HBB_HUMAN,sp|P10909|CLUS_HUMAN,sp|P69905|HBA_HUMAN
biological_process	regulation of cellular localization	10	0.123949	sp|Q9UEU0|VTI1B_HUMAN,sp|Q99436|PSB7_HUMAN,sp|P80108|PHLD_HUMAN,sp|Q96CW1|AP2M1_HUMAN,sp|P02545|LMNA_HUMAN,sp|P07355|ANXA2_HUMAN,sp|Q9UL25|RAB21_HUMAN,sp|P62834|RAP1A_HUMAN,sp|P50990|TCPQ_HUMAN,sp|P60953|CDC42_HUMAN
biological_process	protein complex subunit organization	15	0.124649	sp|Q719H9|KCTD1_HUMAN,sp|P02679|FIBG_HUMAN,sp|O00161|SNP23_HUMAN,sp|P50552|VASP_HUMAN,sp|P00492|HPRT_HUMAN,sp|P02671|FIBA_HUMAN,sp|Q9NTM9|CUTC_HUMAN,sp|P07355|ANXA2_HUMAN,sp|P02675|FIBB_HUMAN,sp|O95831|AIFM1_HUMAN,sp|P55072|TERA_HUMAN,sp|P50990|TCPQ_HUMAN,sp|P68871|HBB_HUMAN,sp|P10909|CLUS_HUMAN,sp|P69905|HBA_HUMAN
biological_process	cellular developmental process	28	0.12498	sp|P61769|B2MG_HUMAN,sp|P02679|FIBG_HUMAN,sp|P80108|PHLD_HUMAN,sp|P01040|CYTA_HUMAN,sp|P50552|VASP_HUMAN,sp|P02647|APOA1_HUMAN,sp|P07355|ANXA2_HUMAN,sp|Q9NSB4|KRT82_HUMAN,sp|P35052|GPC1_HUMAN,sp|Q92764|KRT35_HUMAN,sp|Q6A163|K1C39_HUMAN,sp|P60953|CDC42_HUMAN,sp|P35579|MYH9_HUMAN,sp|Q14118|DAG1_HUMAN,sp|P01034|CYTC_HUMAN,sp|O75326|SEM7A_HUMAN,sp|P01023|A2MG_HUMAN,sp|P61604|CH10_HUMAN,sp|O43278|SPIT…
biological_process	Wnt signaling pathway	6	0.125242	sp|Q9UL18|AGO1_HUMAN,sp|Q99436|PSB7_HUMAN,sp|P28066|PSA5_HUMAN,sp|P16870|CBPE_HUMAN,sp|Q96CW1|AP2M1_HUMAN,sp|P60953|CDC42_HUMAN
biological_process	positive regulation of innate immune response	6	0.125242	sp|Q96DR8|MUCL1_HUMAN,sp|Q99436|PSB7_HUMAN,sp|P02675|FIBB_HUMAN,sp|P28066|PSA5_HUMAN,sp|P02679|FIBG_HUMAN,sp|P02671|FIBA_HUMAN
biological_process	cell-cell signaling by wnt	6	0.125242	sp|Q9UL18|AGO1_HUMAN,sp|Q99436|PSB7_HUMAN,sp|P28066|PSA5_HUMAN,sp|P16870|CBPE_HUMAN,sp|Q96CW1|AP2M1_HUMAN,sp|P60953|CDC42_HUMAN
biological_process	cell surface receptor signaling pathway involved in cell-cell signaling	6	0.125242	sp|Q9UL18|AGO1_HUMAN,sp|Q99436|PSB7_HUMAN,sp|P28066|PSA5_HUMAN,sp|P16870|CBPE_HUMAN,sp|Q96CW1|AP2M1_HUMAN,sp|P60953|CDC42_HUMAN
biological_process	negative regulation of molecular function	11	0.12562	sp|P61769|B2MG_HUMAN,sp|P02652|APOA2_HUMAN,sp|P01034|CYTC_HUMAN,sp|Q99436|PSB7_HUMAN,sp|Q16610|ECM1_HUMAN,sp|P01040|CYTA_HUMAN,sp|P02647|APOA1_HUMAN,sp|P00738|HPT_HUMAN,sp|P07355|ANXA2_HUMAN,sp|P28066|PSA5_HUMAN,sp|P35237|SPB6_HUMAN
biological_process	regulation of catabolic process	12	0.126332	sp|P02652|APOA2_HUMAN,sp|P01034|CYTC_HUMAN,sp|Q99436|PSB7_HUMAN,sp|P80108|PHLD_HUMAN,sp|P00738|HPT_HUMAN,sp|P07355|ANXA2_HUMAN,sp|O75874|IDHC_HUMAN,sp|P28066|PSA5_HUMAN,sp|O95831|AIFM1_HUMAN,sp|P55072|TERA_HUMAN,sp|P10909|CLUS_HUMAN,sp|P60953|CDC42_HUMAN
biological_process	negative regulation of macromolecule metabolic process	17	0.126361	sp|Q9UL18|AGO1_HUMAN,sp|Q14118|DAG1_HUMAN,sp|P01034|CYTC_HUMAN,sp|Q99436|PSB7_HUMAN,sp|Q719H9|KCTD1_HUMAN,sp|Q16610|ECM1_HUMAN,sp|P01023|A2MG_HUMAN,sp|P01040|CYTA_HUMAN,sp|P02671|FIBA_HUMAN,sp|Q15631|TSN_HUMAN,sp|P07355|ANXA2_HUMAN,sp|P04406|G3P_HUMAN,sp|P28066|PSA5_HUMAN,sp|P62834|RAP1A_HUMAN,sp|P35237|SPB6_HUMAN,sp|P10909|CLUS_HUMAN,sp|P60953|CDC42_HUMAN
biological_process	neutrophil activation involved in immune response	18	0.128979	sp|Q99436|PSB7_HUMAN,sp|Q9NQR4|NIT2_HUMAN,sp|O00161|SNP23_HUMAN,sp|P07355|ANXA2_HUMAN,sp|O75874|IDHC_HUMAN,sp|P28066|PSA5_HUMAN,sp|Q99536|VAT1_HUMAN,sp|P02763|A1AG1_HUMAN,sp|P50990|TCPQ_HUMAN,sp|P30740|ILEU_HUMAN,sp|P01011|AACT_HUMAN,sp|P01034|CYTC_HUMAN,sp|O75787|RENR_HUMAN,sp|P00738|HPT_HUMAN,sp|P06737|PYGL_HUMAN,sp|P62834|RAP1A_HUMAN,sp|P68871|HBB_HUMAN,sp|P35237|SPB6_HUMAN
biological_process	neutrophil degranulation	18	0.128979	sp|Q99436|PSB7_HUMAN,sp|Q9NQR4|NIT2_HUMAN,sp|O00161|SNP23_HUMAN,sp|P07355|ANXA2_HUMAN,sp|O75874|IDHC_HUMAN,sp|P28066|PSA5_HUMAN,sp|Q99536|VAT1_HUMAN,sp|P02763|A1AG1_HUMAN,sp|P50990|TCPQ_HUMAN,sp|P30740|ILEU_HUMAN,sp|P01011|AACT_HUMAN,sp|P01034|CYTC_HUMAN,sp|O75787|RENR_HUMAN,sp|P00738|HPT_HUMAN,sp|P06737|PYGL_HUMAN,sp|P62834|RAP1A_HUMAN,sp|P68871|HBB_HUMAN,sp|P35237|SPB6_HUMAN
biological_process	regulation of catalytic activity	17	0.131328	sp|Q99436|PSB7_HUMAN,sp|P80108|PHLD_HUMAN,sp|Q16610|ECM1_HUMAN,sp|P01040|CYTA_HUMAN,sp|P02647|APOA1_HUMAN,sp|P28066|PSA5_HUMAN,sp|P55072|TERA_HUMAN,sp|P60953|CDC42_HUMAN,sp|P01034|CYTC_HUMAN,sp|P02652|APOA2_HUMAN,sp|Q14118|DAG1_HUMAN,sp|P61604|CH10_HUMAN,sp|P00738|HPT_HUMAN,sp|P62834|RAP1A_HUMAN,sp|O95831|AIFM1_HUMAN,sp|P10909|CLUS_HUMAN,sp|P35237|SPB6_HUMAN
biological_process	plasma membrane bounded cell projection organization	8	0.131631	sp|P35579|MYH9_HUMAN,sp|Q14118|DAG1_HUMAN,sp|O75326|SEM7A_HUMAN,sp|P35052|GPC1_HUMAN,sp|P50552|VASP_HUMAN,sp|P00492|HPRT_HUMAN,sp|P60953|CDC42_HUMAN,sp|P02647|APOA1_HUMAN
biological_process	tissue morphogenesis	5	0.132375	sp|Q14118|DAG1_HUMAN,sp|P00918|CAH2_HUMAN,sp|O43278|SPIT1_HUMAN,sp|P50552|VASP_HUMAN,sp|P60953|CDC42_HUMAN
biological_process	negative regulation of peptide secretion	2	0.132842	sp|P02652|APOA2_HUMAN,sp|P02647|APOA1_HUMAN
biological_process	citrate metabolic process	2	0.132842	sp|O75874|IDHC_HUMAN,sp|P40926|MDHM_HUMAN
biological_process	double-strand break repair	2	0.132842	sp|P46736|BRCC3_HUMAN,sp|P55072|TERA_HUMAN
biological_process	post-Golgi vesicle-mediated transport	2	0.132842	sp|Q9UEU0|VTI1B_HUMAN,sp|O00161|SNP23_HUMAN
biological_process	sterol transport	2	0.132842	sp|P02652|APOA2_HUMAN,sp|P02647|APOA1_HUMAN
biological_process	gene silencing	2	0.132842	sp|Q15631|TSN_HUMAN,sp|Q9UL18|AGO1_HUMAN
biological_process	cholesterol transport	2	0.132842	sp|P02652|APOA2_HUMAN,sp|P02647|APOA1_HUMAN
biological_process	positive regulation of protein binding	2	0.132842	sp|P07355|ANXA2_HUMAN,sp|P61769|B2MG_HUMAN
biological_process	cholesterol efflux	2	0.132842	sp|P02652|APOA2_HUMAN,sp|P02647|APOA1_HUMAN
biological_process	cholesterol homeostasis	2	0.132842	sp|P02652|APOA2_HUMAN,sp|P02647|APOA1_HUMAN
biological_process	cellular carbohydrate catabolic process	2	0.132842	sp|P43304|GPDM_HUMAN,sp|P06737|PYGL_HUMAN
biological_process	cardiac muscle tissue development	2	0.132842	sp|P60953|CDC42_HUMAN,sp|P02545|LMNA_HUMAN
biological_process	negative regulation of protein secretion	2	0.132842	sp|P02652|APOA2_HUMAN,sp|P02647|APOA1_HUMAN
biological_process	sensory perception of taste	2	0.132842	sp|P23280|CAH6_HUMAN,sp|P12273|PIP_HUMAN
biological_process	sterol homeostasis	2	0.132842	sp|P02652|APOA2_HUMAN,sp|P02647|APOA1_HUMAN
biological_process	protein-lipid complex subunit organization	2	0.132842	sp|P02652|APOA2_HUMAN,sp|P02647|APOA1_HUMAN
biological_process	plasma lipoprotein particle organization	2	0.132842	sp|P02652|APOA2_HUMAN,sp|P02647|APOA1_HUMAN
biological_process	synaptic vesicle cycle	2	0.132842	sp|Q96CW1|AP2M1_HUMAN,sp|O00161|SNP23_HUMAN
biological_process	positive regulation of reactive oxygen species biosynthetic process	2	0.132842	sp|P68871|HBB_HUMAN,sp|P10909|CLUS_HUMAN
biological_process	cellular respiration	3	0.134632	sp|O75874|IDHC_HUMAN,sp|P43304|GPDM_HUMAN,sp|P40926|MDHM_HUMAN
biological_process	positive regulation of exocytosis	3	0.134632	sp|P02675|FIBB_HUMAN,sp|P02679|FIBG_HUMAN,sp|P02671|FIBA_HUMAN
biological_process	cellular response to inorganic substance	3	0.134632	sp|P61769|B2MG_HUMAN,sp|P80108|PHLD_HUMAN,sp|O95831|AIFM1_HUMAN
biological_process	negative regulation of developmental process	6	0.134816	sp|P07355|ANXA2_HUMAN,sp|P61769|B2MG_HUMAN,sp|P01034|CYTC_HUMAN,sp|Q99536|VAT1_HUMAN,sp|Q16610|ECM1_HUMAN,sp|P08582|TRFM_HUMAN
biological_process	regulation of cellular process	55	0.136195	sp|Q99436|PSB7_HUMAN,sp|P80108|PHLD_HUMAN,sp|P01040|CYTA_HUMAN,sp|P12273|PIP_HUMAN,sp|P07355|ANXA2_HUMAN,sp|O75874|IDHC_HUMAN,sp|P35052|GPC1_HUMAN,sp|P02763|A1AG1_HUMAN,sp|P08582|TRFM_HUMAN,sp|O15296|LX15B_HUMAN,sp|P35579|MYH9_HUMAN,sp|P02652|APOA2_HUMAN,sp|P01034|CYTC_HUMAN,sp|O75326|SEM7A_HUMAN,sp|P0C869|PA24B_HUMAN,sp|O75787|RENR_HUMAN,sp|P02671|FIBA_HUMAN,sp|P02545|LMNA_HUMAN,sp|P04406|G3P_HU…
biological_process	response to steroid hormone	4	0.137004	sp|P02652|APOA2_HUMAN,sp|O75874|IDHC_HUMAN,sp|P00918|CAH2_HUMAN,sp|O95831|AIFM1_HUMAN
biological_process	reproductive structure development	4	0.137004	sp|P01034|CYTC_HUMAN,sp|O75874|IDHC_HUMAN,sp|O43278|SPIT1_HUMAN,sp|O15296|LX15B_HUMAN
biological_process	protein tetramerization	4	0.137004	sp|P07355|ANXA2_HUMAN,sp|Q9NTM9|CUTC_HUMAN,sp|P50552|VASP_HUMAN,sp|P00492|HPRT_HUMAN
biological_process	reproductive system development	4	0.137004	sp|P01034|CYTC_HUMAN,sp|O75874|IDHC_HUMAN,sp|O43278|SPIT1_HUMAN,sp|O15296|LX15B_HUMAN
biological_process	neutrophil activation	18	0.138845	sp|Q99436|PSB7_HUMAN,sp|Q9NQR4|NIT2_HUMAN,sp|O00161|SNP23_HUMAN,sp|P07355|ANXA2_HUMAN,sp|O75874|IDHC_HUMAN,sp|P28066|PSA5_HUMAN,sp|Q99536|VAT1_HUMAN,sp|P02763|A1AG1_HUMAN,sp|P50990|TCPQ_HUMAN,sp|P30740|ILEU_HUMAN,sp|P01011|AACT_HUMAN,sp|P01034|CYTC_HUMAN,sp|O75787|RENR_HUMAN,sp|P00738|HPT_HUMAN,sp|P06737|PYGL_HUMAN,sp|P62834|RAP1A_HUMAN,sp|P68871|HBB_HUMAN,sp|P35237|SPB6_HUMAN
biological_process	leukocyte degranulation	18	0.138845	sp|Q99436|PSB7_HUMAN,sp|Q9NQR4|NIT2_HUMAN,sp|O00161|SNP23_HUMAN,sp|P07355|ANXA2_HUMAN,sp|O75874|IDHC_HUMAN,sp|P28066|PSA5_HUMAN,sp|Q99536|VAT1_HUMAN,sp|P02763|A1AG1_HUMAN,sp|P50990|TCPQ_HUMAN,sp|P30740|ILEU_HUMAN,sp|P01011|AACT_HUMAN,sp|P01034|CYTC_HUMAN,sp|O75787|RENR_HUMAN,sp|P00738|HPT_HUMAN,sp|P06737|PYGL_HUMAN,sp|P62834|RAP1A_HUMAN,sp|P68871|HBB_HUMAN,sp|P35237|SPB6_HUMAN
biological_process	immune response-regulating signaling pathway	7	0.142983	sp|Q96DR8|MUCL1_HUMAN,sp|Q99436|PSB7_HUMAN,sp|P02675|FIBB_HUMAN,sp|P28066|PSA5_HUMAN,sp|P02679|FIBG_HUMAN,sp|P80108|PHLD_HUMAN,sp|P02671|FIBA_HUMAN
biological_process	positive regulation of neurogenesis	5	0.143632	sp|Q14118|DAG1_HUMAN,sp|Q9UL25|RAB21_HUMAN,sp|O75326|SEM7A_HUMAN,sp|P62834|RAP1A_HUMAN,sp|O43278|SPIT1_HUMAN
biological_process	positive regulation of nervous system development	5	0.143632	sp|Q14118|DAG1_HUMAN,sp|Q9UL25|RAB21_HUMAN,sp|O75326|SEM7A_HUMAN,sp|P62834|RAP1A_HUMAN,sp|O43278|SPIT1_HUMAN
biological_process	defense response to other organism	5	0.143632	sp|P00738|HPT_HUMAN,sp|P04406|G3P_HUMAN,sp|P02675|FIBB_HUMAN,sp|P81605|DCD_HUMAN,sp|P02671|FIBA_HUMAN
biological_process	vesicle-mediated transport	30	0.143836	sp|Q9UEU0|VTI1B_HUMAN,sp|Q99436|PSB7_HUMAN,sp|P02679|FIBG_HUMAN,sp|Q16610|ECM1_HUMAN,sp|Q9NQR4|NIT2_HUMAN,sp|O00161|SNP23_HUMAN,sp|P07355|ANXA2_HUMAN,sp|P28066|PSA5_HUMAN,sp|O75874|IDHC_HUMAN,sp|Q99536|VAT1_HUMAN,sp|P02763|A1AG1_HUMAN,sp|P55072|TERA_HUMAN,sp|P50990|TCPQ_HUMAN,sp|P30740|ILEU_HUMAN,sp|P60953|CDC42_HUMAN,sp|P35579|MYH9_HUMAN,sp|P01034|CYTC_HUMAN,sp|P01011|AACT_HUMAN,sp|O75787|RENR_H…
biological_process	neutrophil mediated immunity	18	0.143942	sp|Q99436|PSB7_HUMAN,sp|Q9NQR4|NIT2_HUMAN,sp|O00161|SNP23_HUMAN,sp|P07355|ANXA2_HUMAN,sp|O75874|IDHC_HUMAN,sp|P28066|PSA5_HUMAN,sp|Q99536|VAT1_HUMAN,sp|P02763|A1AG1_HUMAN,sp|P50990|TCPQ_HUMAN,sp|P30740|ILEU_HUMAN,sp|P01011|AACT_HUMAN,sp|P01034|CYTC_HUMAN,sp|O75787|RENR_HUMAN,sp|P00738|HPT_HUMAN,sp|P06737|PYGL_HUMAN,sp|P62834|RAP1A_HUMAN,sp|P68871|HBB_HUMAN,sp|P35237|SPB6_HUMAN
biological_process	granulocyte activation	18	0.143942	sp|Q99436|PSB7_HUMAN,sp|Q9NQR4|NIT2_HUMAN,sp|O00161|SNP23_HUMAN,sp|P07355|ANXA2_HUMAN,sp|O75874|IDHC_HUMAN,sp|P28066|PSA5_HUMAN,sp|Q99536|VAT1_HUMAN,sp|P02763|A1AG1_HUMAN,sp|P50990|TCPQ_HUMAN,sp|P30740|ILEU_HUMAN,sp|P01011|AACT_HUMAN,sp|P01034|CYTC_HUMAN,sp|O75787|RENR_HUMAN,sp|P00738|HPT_HUMAN,sp|P06737|PYGL_HUMAN,sp|P62834|RAP1A_HUMAN,sp|P68871|HBB_HUMAN,sp|P35237|SPB6_HUMAN
biological_process	positive regulation of molecular function	13	0.144092	sp|Q14118|DAG1_HUMAN,sp|P61769|B2MG_HUMAN,sp|Q99436|PSB7_HUMAN,sp|P80108|PHLD_HUMAN,sp|P61604|CH10_HUMAN,sp|P02647|APOA1_HUMAN,sp|P07355|ANXA2_HUMAN,sp|P28066|PSA5_HUMAN,sp|P62834|RAP1A_HUMAN,sp|O95831|AIFM1_HUMAN,sp|P55072|TERA_HUMAN,sp|P10909|CLUS_HUMAN,sp|P60953|CDC42_HUMAN
biological_process	cation transport	6	0.144731	sp|Q9NTM9|CUTC_HUMAN,sp|P61769|B2MG_HUMAN,sp|P00450|CERU_HUMAN,sp|O00161|SNP23_HUMAN,sp|Q9UHW9|S12A6_HUMAN,sp|P08582|TRFM_HUMAN
biological_process	response to metal ion	6	0.144731	sp|P61769|B2MG_HUMAN,sp|P02675|FIBB_HUMAN,sp|P00918|CAH2_HUMAN,sp|P02679|FIBG_HUMAN,sp|P80108|PHLD_HUMAN,sp|P02671|FIBA_HUMAN
biological_process	negative regulation of signal transduction	11	0.14527	sp|Q14118|DAG1_HUMAN,sp|Q99436|PSB7_HUMAN,sp|P02679|FIBG_HUMAN,sp|Q16610|ECM1_HUMAN,sp|P02647|APOA1_HUMAN,sp|P02545|LMNA_HUMAN,sp|P02671|FIBA_HUMAN,sp|P28066|PSA5_HUMAN,sp|P02675|FIBB_HUMAN,sp|P35052|GPC1_HUMAN,sp|P10909|CLUS_HUMAN
biological_process	positive regulation of catalytic activity	11	0.14527	sp|Q14118|DAG1_HUMAN,sp|Q99436|PSB7_HUMAN,sp|P80108|PHLD_HUMAN,sp|P61604|CH10_HUMAN,sp|P02647|APOA1_HUMAN,sp|P28066|PSA5_HUMAN,sp|P62834|RAP1A_HUMAN,sp|O95831|AIFM1_HUMAN,sp|P55072|TERA_HUMAN,sp|P10909|CLUS_HUMAN,sp|P60953|CDC42_HUMAN
biological_process	cell projection organization	8	0.147924	sp|P35579|MYH9_HUMAN,sp|Q14118|DAG1_HUMAN,sp|O75326|SEM7A_HUMAN,sp|P35052|GPC1_HUMAN,sp|P50552|VASP_HUMAN,sp|P00492|HPRT_HUMAN,sp|P60953|CDC42_HUMAN,sp|P02647|APOA1_HUMAN
biological_process	locomotion	8	0.147924	sp|P35579|MYH9_HUMAN,sp|Q14118|DAG1_HUMAN,sp|P80108|PHLD_HUMAN,sp|O75326|SEM7A_HUMAN,sp|P35052|GPC1_HUMAN,sp|P50552|VASP_HUMAN,sp|P60953|CDC42_HUMAN,sp|P02647|APOA1_HUMAN
biological_process	protein oligomerization	8	0.147924	sp|P07355|ANXA2_HUMAN,sp|Q9NTM9|CUTC_HUMAN,sp|Q719H9|KCTD1_HUMAN,sp|P55072|TERA_HUMAN,sp|P68871|HBB_HUMAN,sp|P50552|VASP_HUMAN,sp|P69905|HBA_HUMAN,sp|P00492|HPRT_HUMAN
biological_process	positive regulation of signal transduction	14	0.148615	sp|Q9UL18|AGO1_HUMAN,sp|Q99436|PSB7_HUMAN,sp|P02679|FIBG_HUMAN,sp|O75326|SEM7A_HUMAN,sp|Q16610|ECM1_HUMAN,sp|O75787|RENR_HUMAN,sp|P02647|APOA1_HUMAN,sp|P02671|FIBA_HUMAN,sp|P26447|S10A4_HUMAN,sp|P02675|FIBB_HUMAN,sp|P28066|PSA5_HUMAN,sp|P62834|RAP1A_HUMAN,sp|O15296|LX15B_HUMAN,sp|P60953|CDC42_HUMAN
biological_process	negative regulation of response to stimulus	14	0.148615	sp|Q14118|DAG1_HUMAN,sp|P02652|APOA2_HUMAN,sp|Q99436|PSB7_HUMAN,sp|P02679|FIBG_HUMAN,sp|Q16610|ECM1_HUMAN,sp|P01023|A2MG_HUMAN,sp|P02647|APOA1_HUMAN,sp|P02545|LMNA_HUMAN,sp|P02671|FIBA_HUMAN,sp|P07355|ANXA2_HUMAN,sp|P28066|PSA5_HUMAN,sp|P02675|FIBB_HUMAN,sp|P35052|GPC1_HUMAN,sp|P10909|CLUS_HUMAN
biological_process	myeloid cell activation involved in immune response	18	0.149148	sp|Q99436|PSB7_HUMAN,sp|Q9NQR4|NIT2_HUMAN,sp|O00161|SNP23_HUMAN,sp|P07355|ANXA2_HUMAN,sp|O75874|IDHC_HUMAN,sp|P28066|PSA5_HUMAN,sp|Q99536|VAT1_HUMAN,sp|P02763|A1AG1_HUMAN,sp|P50990|TCPQ_HUMAN,sp|P30740|ILEU_HUMAN,sp|P01011|AACT_HUMAN,sp|P01034|CYTC_HUMAN,sp|O75787|RENR_HUMAN,sp|P00738|HPT_HUMAN,sp|P06737|PYGL_HUMAN,sp|P62834|RAP1A_HUMAN,sp|P68871|HBB_HUMAN,sp|P35237|SPB6_HUMAN
biological_process	anatomical structure development	37	0.150388	sp|P80108|PHLD_HUMAN,sp|P01040|CYTA_HUMAN,sp|P07355|ANXA2_HUMAN,sp|O75874|IDHC_HUMAN,sp|P35052|GPC1_HUMAN,sp|O15296|LX15B_HUMAN,sp|P35579|MYH9_HUMAN,sp|P02652|APOA2_HUMAN,sp|P01034|CYTC_HUMAN,sp|O75326|SEM7A_HUMAN,sp|O75787|RENR_HUMAN,sp|P02545|LMNA_HUMAN,sp|P19012|K1C15_HUMAN,sp|P62834|RAP1A_HUMAN,sp|Q9UHW9|S12A6_HUMAN,sp|P10909|CLUS_HUMAN,sp|P61769|B2MG_HUMAN,sp|P02679|FIBG_HUMAN,sp|P43304|GPDM…
biological_process	receptor-mediated endocytosis	4	0.150617	sp|P00738|HPT_HUMAN,sp|Q96CW1|AP2M1_HUMAN,sp|P68871|HBB_HUMAN,sp|P69905|HBA_HUMAN
biological_process	negative regulation of peptidase activity	4	0.150617	sp|P01034|CYTC_HUMAN,sp|Q16610|ECM1_HUMAN,sp|P01040|CYTA_HUMAN,sp|P35237|SPB6_HUMAN
biological_process	tube development	4	0.150617	sp|Q14118|DAG1_HUMAN,sp|O75787|RENR_HUMAN,sp|O43278|SPIT1_HUMAN,sp|P50552|VASP_HUMAN
biological_process	growth	4	0.150617	sp|Q14118|DAG1_HUMAN,sp|P43304|GPDM_HUMAN,sp|O75326|SEM7A_HUMAN,sp|P60953|CDC42_HUMAN
biological_process	response to monosaccharide	3	0.151939	sp|P02652|APOA2_HUMAN,sp|P80108|PHLD_HUMAN,sp|P62834|RAP1A_HUMAN
biological_process	regulation of blood circulation	3	0.151939	sp|P02675|FIBB_HUMAN,sp|P02679|FIBG_HUMAN,sp|P02671|FIBA_HUMAN
biological_process	organic hydroxy compound metabolic process	6	0.154977	sp|P02652|APOA2_HUMAN,sp|P43304|GPDM_HUMAN,sp|P07195|LDHB_HUMAN,sp|P02774|VTDB_HUMAN,sp|P00492|HPRT_HUMAN,sp|P02647|APOA1_HUMAN
biological_process	generation of precursor metabolites and energy	5	0.155295	sp|P04406|G3P_HUMAN,sp|O75874|IDHC_HUMAN,sp|P43304|GPDM_HUMAN,sp|P06737|PYGL_HUMAN,sp|P40926|MDHM_HUMAN
biological_process	regulation of response to external stimulus	8	0.156433	sp|P07355|ANXA2_HUMAN,sp|P02675|FIBB_HUMAN,sp|P02679|FIBG_HUMAN,sp|O75326|SEM7A_HUMAN,sp|P01008|ANT3_HUMAN,sp|P01023|A2MG_HUMAN,sp|P02647|APOA1_HUMAN,sp|P02671|FIBA_HUMAN
biological_process	retinoid metabolic process	2	0.158558	sp|P02652|APOA2_HUMAN,sp|P35052|GPC1_HUMAN
biological_process	C-terminal protein lipidation	2	0.158558	sp|P80108|PHLD_HUMAN,sp|P08582|TRFM_HUMAN
biological_process	protein import into nucleus	2	0.158558	sp|Q14118|DAG1_HUMAN,sp|P02545|LMNA_HUMAN
biological_process	sensory perception of chemical stimulus	2	0.158558	sp|P23280|CAH6_HUMAN,sp|P12273|PIP_HUMAN
biological_process	detection of chemical stimulus	2	0.158558	sp|P23280|CAH6_HUMAN,sp|P12273|PIP_HUMAN
biological_process	organophosphate ester transport	2	0.158558	sp|P02652|APOA2_HUMAN,sp|P02647|APOA1_HUMAN
biological_process	phospholipid transport	2	0.158558	sp|P02652|APOA2_HUMAN,sp|P02647|APOA1_HUMAN
biological_process	C-terminal protein amino acid modification	2	0.158558	sp|P80108|PHLD_HUMAN,sp|P08582|TRFM_HUMAN
biological_process	antibacterial humoral response	2	0.158558	sp|P02675|FIBB_HUMAN,sp|P02671|FIBA_HUMAN
biological_process	regulation of proteasomal ubiquitin-dependent protein catabolic process	2	0.158558	sp|P55072|TERA_HUMAN,sp|P10909|CLUS_HUMAN
biological_process	regulation of interleukin-1 production	2	0.158558	sp|P02763|A1AG1_HUMAN,sp|P02647|APOA1_HUMAN
biological_process	regulation of tumor necrosis factor production	2	0.158558	sp|P02763|A1AG1_HUMAN,sp|P10909|CLUS_HUMAN
biological_process	regulation of nitric oxide biosynthetic process	2	0.158558	sp|P68871|HBB_HUMAN,sp|P10909|CLUS_HUMAN
biological_process	negative regulation of lipid metabolic process	2	0.158558	sp|P02652|APOA2_HUMAN,sp|P80108|PHLD_HUMAN
biological_process	phosphatidylinositol metabolic process	2	0.158558	sp|Q3MJ16|PA24E_HUMAN,sp|P80108|PHLD_HUMAN
biological_process	defense response to fungus	2	0.158558	sp|P04406|G3P_HUMAN,sp|P81605|DCD_HUMAN
biological_process	leukocyte proliferation	2	0.158558	sp|P00492|HPRT_HUMAN,sp|P10909|CLUS_HUMAN
biological_process	cellular response to interleukin-1	2	0.158558	sp|P02675|FIBB_HUMAN,sp|P02679|FIBG_HUMAN
biological_process	tricarboxylic acid metabolic process	2	0.158558	sp|O75874|IDHC_HUMAN,sp|P40926|MDHM_HUMAN
biological_process	cellular oxidant detoxification	2	0.158558	sp|P68871|HBB_HUMAN,sp|P69905|HBA_HUMAN
biological_process	vesicle-mediated transport in synapse	2	0.158558	sp|Q96CW1|AP2M1_HUMAN,sp|O00161|SNP23_HUMAN
biological_process	regulation of tumor necrosis factor superfamily cytokine production	2	0.158558	sp|P02763|A1AG1_HUMAN,sp|P10909|CLUS_HUMAN
biological_process	myeloid leukocyte mediated immunity	18	0.159884	sp|Q99436|PSB7_HUMAN,sp|Q9NQR4|NIT2_HUMAN,sp|O00161|SNP23_HUMAN,sp|P07355|ANXA2_HUMAN,sp|O75874|IDHC_HUMAN,sp|P28066|PSA5_HUMAN,sp|Q99536|VAT1_HUMAN,sp|P02763|A1AG1_HUMAN,sp|P50990|TCPQ_HUMAN,sp|P30740|ILEU_HUMAN,sp|P01011|AACT_HUMAN,sp|P01034|CYTC_HUMAN,sp|O75787|RENR_HUMAN,sp|P00738|HPT_HUMAN,sp|P06737|PYGL_HUMAN,sp|P62834|RAP1A_HUMAN,sp|P68871|HBB_HUMAN,sp|P35237|SPB6_HUMAN
biological_process	macromolecular complex subunit organization	18	0.159884	sp|P02679|FIBG_HUMAN,sp|O00161|SNP23_HUMAN,sp|P50552|VASP_HUMAN,sp|P02647|APOA1_HUMAN,sp|P07355|ANXA2_HUMAN,sp|P55072|TERA_HUMAN,sp|P50990|TCPQ_HUMAN,sp|Q9UL18|AGO1_HUMAN,sp|P02652|APOA2_HUMAN,sp|Q719H9|KCTD1_HUMAN,sp|P02671|FIBA_HUMAN,sp|P00492|HPRT_HUMAN,sp|Q9NTM9|CUTC_HUMAN,sp|P02675|FIBB_HUMAN,sp|O95831|AIFM1_HUMAN,sp|P68871|HBB_HUMAN,sp|P10909|CLUS_HUMAN,sp|P69905|HBA_HUMAN
biological_process	positive regulation of response to stimulus	18	0.159884	sp|P61769|B2MG_HUMAN,sp|Q99436|PSB7_HUMAN,sp|P02679|FIBG_HUMAN,sp|P80108|PHLD_HUMAN,sp|Q16610|ECM1_HUMAN,sp|P02647|APOA1_HUMAN,sp|P46736|BRCC3_HUMAN,sp|P28066|PSA5_HUMAN,sp|P60953|CDC42_HUMAN,sp|O15296|LX15B_HUMAN,sp|Q96DR8|MUCL1_HUMAN,sp|Q9UL18|AGO1_HUMAN,sp|O75326|SEM7A_HUMAN,sp|O75787|RENR_HUMAN,sp|P02671|FIBA_HUMAN,sp|P26447|S10A4_HUMAN,sp|P02675|FIBB_HUMAN,sp|P62834|RAP1A_HUMAN
biological_process	developmental process	39	0.162242	sp|P80108|PHLD_HUMAN,sp|P01040|CYTA_HUMAN,sp|P07355|ANXA2_HUMAN,sp|O75874|IDHC_HUMAN,sp|P35052|GPC1_HUMAN,sp|O15296|LX15B_HUMAN,sp|P35579|MYH9_HUMAN,sp|P02652|APOA2_HUMAN,sp|P01034|CYTC_HUMAN,sp|O75326|SEM7A_HUMAN,sp|O75787|RENR_HUMAN,sp|P02545|LMNA_HUMAN,sp|P19012|K1C15_HUMAN,sp|P62834|RAP1A_HUMAN,sp|Q9UHW9|S12A6_HUMAN,sp|P10909|CLUS_HUMAN,sp|P61769|B2MG_HUMAN,sp|P02679|FIBG_HUMAN,sp|P43304|GPDM…
biological_process	proteolysis	13	0.163202	sp|P35579|MYH9_HUMAN,sp|Q14118|DAG1_HUMAN,sp|Q15018|ABRX2_HUMAN,sp|Q99436|PSB7_HUMAN,sp|P02679|FIBG_HUMAN,sp|O75787|RENR_HUMAN,sp|P12273|PIP_HUMAN,sp|P02671|FIBA_HUMAN,sp|P46736|BRCC3_HUMAN,sp|P28066|PSA5_HUMAN,sp|P02675|FIBB_HUMAN,sp|P16870|CBPE_HUMAN,sp|P55072|TERA_HUMAN
biological_process	regulation of cell communication	22	0.16405	sp|Q99436|PSB7_HUMAN,sp|P02679|FIBG_HUMAN,sp|P80108|PHLD_HUMAN,sp|Q16610|ECM1_HUMAN,sp|P02647|APOA1_HUMAN,sp|P07355|ANXA2_HUMAN,sp|P28066|PSA5_HUMAN,sp|P35052|GPC1_HUMAN,sp|P60953|CDC42_HUMAN,sp|O15296|LX15B_HUMAN,sp|Q9UL18|AGO1_HUMAN,sp|Q14118|DAG1_HUMAN,sp|P00918|CAH2_HUMAN,sp|O75326|SEM7A_HUMAN,sp|O75787|RENR_HUMAN,sp|P01023|A2MG_HUMAN,sp|P02671|FIBA_HUMAN,sp|P02545|LMNA_HUMAN,sp|P26447|S10A4_…
biological_process	modification of morphology or physiology of other organism	4	0.164731	sp|P07355|ANXA2_HUMAN,sp|P04406|G3P_HUMAN,sp|Q14118|DAG1_HUMAN,sp|P81605|DCD_HUMAN
biological_process	protein stabilization	4	0.164731	sp|P04406|G3P_HUMAN,sp|P50990|TCPQ_HUMAN,sp|P02647|APOA1_HUMAN,sp|P10909|CLUS_HUMAN
biological_process	cellular response to toxic substance	4	0.164731	sp|P01034|CYTC_HUMAN,sp|O95831|AIFM1_HUMAN,sp|P68871|HBB_HUMAN,sp|P69905|HBA_HUMAN
biological_process	response to abiotic stimulus	12	0.165107	sp|Q14118|DAG1_HUMAN,sp|P01034|CYTC_HUMAN,sp|Q99436|PSB7_HUMAN,sp|P00918|CAH2_HUMAN,sp|P80108|PHLD_HUMAN,sp|P06732|KCRM_HUMAN,sp|P02545|LMNA_HUMAN,sp|P46736|BRCC3_HUMAN,sp|P28066|PSA5_HUMAN,sp|O95831|AIFM1_HUMAN,sp|Q9UHW9|S12A6_HUMAN,sp|P35237|SPB6_HUMAN
biological_process	metal ion transport	5	0.167344	sp|Q9NTM9|CUTC_HUMAN,sp|P61769|B2MG_HUMAN,sp|P00450|CERU_HUMAN,sp|Q9UHW9|S12A6_HUMAN,sp|P08582|TRFM_HUMAN
biological_process	negative regulation of response to external stimulus	5	0.167344	sp|P07355|ANXA2_HUMAN,sp|P02675|FIBB_HUMAN,sp|P02679|FIBG_HUMAN,sp|P02647|APOA1_HUMAN,sp|P02671|FIBA_HUMAN
biological_process	regulation of response to stimulus	26	0.168607	sp|P61769|B2MG_HUMAN,sp|Q99436|PSB7_HUMAN,sp|P02679|FIBG_HUMAN,sp|P80108|PHLD_HUMAN,sp|Q16610|ECM1_HUMAN,sp|P02647|APOA1_HUMAN,sp|P07355|ANXA2_HUMAN,sp|P28066|PSA5_HUMAN,sp|P46736|BRCC3_HUMAN,sp|P35052|GPC1_HUMAN,sp|P60953|CDC42_HUMAN,sp|O15296|LX15B_HUMAN,sp|Q96DR8|MUCL1_HUMAN,sp|Q9UL18|AGO1_HUMAN,sp|Q14118|DAG1_HUMAN,sp|P02652|APOA2_HUMAN,sp|O75326|SEM7A_HUMAN,sp|O75787|RENR_HUMAN,sp|P01008|ANT…
biological_process	epithelial cell development	3	0.169913	sp|P01034|CYTC_HUMAN,sp|P62834|RAP1A_HUMAN,sp|P60953|CDC42_HUMAN
biological_process	G-protein coupled receptor signaling pathway	3	0.169913	sp|P00918|CAH2_HUMAN,sp|P16870|CBPE_HUMAN,sp|P02647|APOA1_HUMAN
biological_process	positive regulation of endopeptidase activity	3	0.169913	sp|O95831|AIFM1_HUMAN,sp|P61604|CH10_HUMAN,sp|P55072|TERA_HUMAN
biological_process	positive regulation of cell-cell adhesion	3	0.169913	sp|P02675|FIBB_HUMAN,sp|P02679|FIBG_HUMAN,sp|P02671|FIBA_HUMAN
biological_process	cofactor catabolic process	3	0.169913	sp|P55072|TERA_HUMAN,sp|P68871|HBB_HUMAN,sp|P69905|HBA_HUMAN
biological_process	cell activation involved in immune response	18	0.171045	sp|Q99436|PSB7_HUMAN,sp|Q9NQR4|NIT2_HUMAN,sp|O00161|SNP23_HUMAN,sp|P07355|ANXA2_HUMAN,sp|O75874|IDHC_HUMAN,sp|P28066|PSA5_HUMAN,sp|Q99536|VAT1_HUMAN,sp|P02763|A1AG1_HUMAN,sp|P50990|TCPQ_HUMAN,sp|P30740|ILEU_HUMAN,sp|P01011|AACT_HUMAN,sp|P01034|CYTC_HUMAN,sp|O75787|RENR_HUMAN,sp|P00738|HPT_HUMAN,sp|P06737|PYGL_HUMAN,sp|P62834|RAP1A_HUMAN,sp|P68871|HBB_HUMAN,sp|P35237|SPB6_HUMAN
biological_process	leukocyte activation involved in immune response	18	0.171045	sp|Q99436|PSB7_HUMAN,sp|Q9NQR4|NIT2_HUMAN,sp|O00161|SNP23_HUMAN,sp|P07355|ANXA2_HUMAN,sp|O75874|IDHC_HUMAN,sp|P28066|PSA5_HUMAN,sp|Q99536|VAT1_HUMAN,sp|P02763|A1AG1_HUMAN,sp|P50990|TCPQ_HUMAN,sp|P30740|ILEU_HUMAN,sp|P01011|AACT_HUMAN,sp|P01034|CYTC_HUMAN,sp|O75787|RENR_HUMAN,sp|P00738|HPT_HUMAN,sp|P06737|PYGL_HUMAN,sp|P62834|RAP1A_HUMAN,sp|P68871|HBB_HUMAN,sp|P35237|SPB6_HUMAN
biological_process	regulation of signal transduction	20	0.173326	sp|Q99436|PSB7_HUMAN,sp|P02679|FIBG_HUMAN,sp|Q16610|ECM1_HUMAN,sp|P02647|APOA1_HUMAN,sp|P07355|ANXA2_HUMAN,sp|P28066|PSA5_HUMAN,sp|P35052|GPC1_HUMAN,sp|P60953|CDC42_HUMAN,sp|O15296|LX15B_HUMAN,sp|Q9UL18|AGO1_HUMAN,sp|Q14118|DAG1_HUMAN,sp|O75326|SEM7A_HUMAN,sp|O75787|RENR_HUMAN,sp|P01023|A2MG_HUMAN,sp|P02671|FIBA_HUMAN,sp|P02545|LMNA_HUMAN,sp|P26447|S10A4_HUMAN,sp|P02675|FIBB_HUMAN,sp|P62834|RAP1A…
biological_process	response to external biotic stimulus	8	0.174145	sp|P61769|B2MG_HUMAN,sp|O75531|BAF_HUMAN,sp|P02671|FIBA_HUMAN,sp|P04406|G3P_HUMAN,sp|P00738|HPT_HUMAN,sp|P02675|FIBB_HUMAN,sp|P81605|DCD_HUMAN,sp|P10909|CLUS_HUMAN
biological_process	response to other organism	8	0.174145	sp|P61769|B2MG_HUMAN,sp|O75531|BAF_HUMAN,sp|P02671|FIBA_HUMAN,sp|P04406|G3P_HUMAN,sp|P00738|HPT_HUMAN,sp|P02675|FIBB_HUMAN,sp|P81605|DCD_HUMAN,sp|P10909|CLUS_HUMAN
biological_process	negative regulation of catalytic activity	9	0.175203	sp|P02652|APOA2_HUMAN,sp|P01034|CYTC_HUMAN,sp|Q99436|PSB7_HUMAN,sp|Q16610|ECM1_HUMAN,sp|P01040|CYTA_HUMAN,sp|P02647|APOA1_HUMAN,sp|P00738|HPT_HUMAN,sp|P28066|PSA5_HUMAN,sp|P35237|SPB6_HUMAN
biological_process	cellular response to stimulus	36	0.177281	sp|Q99436|PSB7_HUMAN,sp|P80108|PHLD_HUMAN,sp|P07355|ANXA2_HUMAN,sp|P35579|MYH9_HUMAN,sp|P01034|CYTC_HUMAN,sp|O75326|SEM7A_HUMAN,sp|P0C869|PA24B_HUMAN,sp|P02671|FIBA_HUMAN,sp|P02545|LMNA_HUMAN,sp|P04406|G3P_HUMAN,sp|Q08380|LG3BP_HUMAN,sp|P62834|RAP1A_HUMAN,sp|P68871|HBB_HUMAN,sp|Q9UHW9|S12A6_HUMAN,sp|P69905|HBA_HUMAN,sp|P35237|SPB6_HUMAN,sp|P61769|B2MG_HUMAN,sp|P02679|FIBG_HUMAN,sp|Q16610|ECM1_HUM…
biological_process	embryo development ending in birth or egg hatching	4	0.179308	sp|P35579|MYH9_HUMAN,sp|O75787|RENR_HUMAN,sp|O43278|SPIT1_HUMAN,sp|P50552|VASP_HUMAN
biological_process	chordate embryonic development	4	0.179308	sp|P35579|MYH9_HUMAN,sp|O75787|RENR_HUMAN,sp|O43278|SPIT1_HUMAN,sp|P50552|VASP_HUMAN
biological_process	cell division	4	0.179308	sp|P35579|MYH9_HUMAN,sp|Q15018|ABRX2_HUMAN,sp|P46736|BRCC3_HUMAN,sp|P60953|CDC42_HUMAN
biological_process	regulation of signaling	22	0.179583	sp|Q99436|PSB7_HUMAN,sp|P02679|FIBG_HUMAN,sp|P80108|PHLD_HUMAN,sp|Q16610|ECM1_HUMAN,sp|P02647|APOA1_HUMAN,sp|P07355|ANXA2_HUMAN,sp|P28066|PSA5_HUMAN,sp|P35052|GPC1_HUMAN,sp|P60953|CDC42_HUMAN,sp|O15296|LX15B_HUMAN,sp|Q9UL18|AGO1_HUMAN,sp|Q14118|DAG1_HUMAN,sp|P00918|CAH2_HUMAN,sp|O75326|SEM7A_HUMAN,sp|O75787|RENR_HUMAN,sp|P01023|A2MG_HUMAN,sp|P02671|FIBA_HUMAN,sp|P02545|LMNA_HUMAN,sp|P26447|S10A4_…
biological_process	humoral immune response	5	0.179755	sp|P04406|G3P_HUMAN,sp|P02675|FIBB_HUMAN,sp|P81605|DCD_HUMAN,sp|P10909|CLUS_HUMAN,sp|P02671|FIBA_HUMAN
biological_process	regulation of intracellular transport	5	0.179755	sp|P07355|ANXA2_HUMAN,sp|Q99436|PSB7_HUMAN,sp|Q9UL25|RAB21_HUMAN,sp|P62834|RAP1A_HUMAN,sp|P60953|CDC42_HUMAN
biological_process	regulation of cellular catabolic process	10	0.183023	sp|P01034|CYTC_HUMAN,sp|Q99436|PSB7_HUMAN,sp|P80108|PHLD_HUMAN,sp|P00738|HPT_HUMAN,sp|P07355|ANXA2_HUMAN,sp|O75874|IDHC_HUMAN,sp|P28066|PSA5_HUMAN,sp|O95831|AIFM1_HUMAN,sp|P55072|TERA_HUMAN,sp|P10909|CLUS_HUMAN
biological_process	regulation of molecular function	19	0.183684	sp|P61769|B2MG_HUMAN,sp|Q99436|PSB7_HUMAN,sp|P80108|PHLD_HUMAN,sp|Q16610|ECM1_HUMAN,sp|P01040|CYTA_HUMAN,sp|P02647|APOA1_HUMAN,sp|P07355|ANXA2_HUMAN,sp|P28066|PSA5_HUMAN,sp|P55072|TERA_HUMAN,sp|P60953|CDC42_HUMAN,sp|Q14118|DAG1_HUMAN,sp|P01034|CYTC_HUMAN,sp|P02652|APOA2_HUMAN,sp|P61604|CH10_HUMAN,sp|P00738|HPT_HUMAN,sp|P62834|RAP1A_HUMAN,sp|O95831|AIFM1_HUMAN,sp|P10909|CLUS_HUMAN,sp|P35237|SPB6_H…
biological_process	response to hormone	9	0.183765	sp|Q14118|DAG1_HUMAN,sp|P02652|APOA2_HUMAN,sp|P01034|CYTC_HUMAN,sp|P00918|CAH2_HUMAN,sp|P80108|PHLD_HUMAN,sp|P07355|ANXA2_HUMAN,sp|O75874|IDHC_HUMAN,sp|P02675|FIBB_HUMAN,sp|O95831|AIFM1_HUMAN
biological_process	tRNA aminoacylation for protein translation	2	0.185104	sp|P49590|SYHM_HUMAN,sp|P12081|SYHC_HUMAN
biological_process	gonad development	2	0.185104	sp|P01034|CYTC_HUMAN,sp|O75874|IDHC_HUMAN
biological_process	nucleotide catabolic process	2	0.185104	sp|P55072|TERA_HUMAN,sp|P00492|HPRT_HUMAN
biological_process	response to fungus	2	0.185104	sp|P04406|G3P_HUMAN,sp|P81605|DCD_HUMAN
biological_process	organic hydroxy compound transport	2	0.185104	sp|P02652|APOA2_HUMAN,sp|P02647|APOA1_HUMAN
biological_process	diterpenoid metabolic process	2	0.185104	sp|P02652|APOA2_HUMAN,sp|P35052|GPC1_HUMAN
biological_process	glial cell development	2	0.185104	sp|Q14118|DAG1_HUMAN,sp|P10909|CLUS_HUMAN
biological_process	regulation of axon extension	2	0.185104	sp|Q9UL25|RAB21_HUMAN,sp|O75326|SEM7A_HUMAN
biological_process	regulation of cell killing	2	0.185104	sp|P04406|G3P_HUMAN,sp|P61769|B2MG_HUMAN
biological_process	plasma lipoprotein particle clearance	2	0.185104	sp|P02652|APOA2_HUMAN,sp|Q96CW1|AP2M1_HUMAN
biological_process	regulation of gene expression, epigenetic	2	0.185104	sp|Q15631|TSN_HUMAN,sp|Q9UL18|AGO1_HUMAN
biological_process	amino acid activation	2	0.185104	sp|P49590|SYHM_HUMAN,sp|P12081|SYHC_HUMAN
biological_process	tRNA aminoacylation	2	0.185104	sp|P49590|SYHM_HUMAN,sp|P12081|SYHC_HUMAN
biological_process	development of primary sexual characteristics	2	0.185104	sp|P01034|CYTC_HUMAN,sp|O75874|IDHC_HUMAN
biological_process	cellular response to hydrogen peroxide	2	0.185104	sp|P01034|CYTC_HUMAN,sp|O95831|AIFM1_HUMAN
biological_process	regulation of reactive oxygen species biosynthetic process	2	0.185104	sp|P68871|HBB_HUMAN,sp|P10909|CLUS_HUMAN
biological_process	regulation of response to DNA damage stimulus	2	0.185104	sp|P46736|BRCC3_HUMAN,sp|P10909|CLUS_HUMAN
biological_process	regulation of neurogenesis	6	0.187564	sp|Q14118|DAG1_HUMAN,sp|P61769|B2MG_HUMAN,sp|Q9UL25|RAB21_HUMAN,sp|O75326|SEM7A_HUMAN,sp|P62834|RAP1A_HUMAN,sp|O43278|SPIT1_HUMAN
biological_process	organophosphate biosynthetic process	6	0.187564	sp|P02652|APOA2_HUMAN,sp|P06737|PYGL_HUMAN,sp|P0C869|PA24B_HUMAN,sp|P06732|KCRM_HUMAN,sp|P00492|HPRT_HUMAN,sp|P02647|APOA1_HUMAN
biological_process	cellular response to nitrogen compound	6	0.187564	sp|Q15631|TSN_HUMAN,sp|Q9UL18|AGO1_HUMAN,sp|P00918|CAH2_HUMAN,sp|P80108|PHLD_HUMAN,sp|O95831|AIFM1_HUMAN,sp|P62834|RAP1A_HUMAN
biological_process	positive regulation of peptidase activity	3	0.188471	sp|O95831|AIFM1_HUMAN,sp|P61604|CH10_HUMAN,sp|P55072|TERA_HUMAN
biological_process	cellular response to topologically incorrect protein	3	0.188471	sp|P0C869|PA24B_HUMAN,sp|P55072|TERA_HUMAN,sp|P02545|LMNA_HUMAN
biological_process	cellular carbohydrate metabolic process	3	0.188471	sp|O75874|IDHC_HUMAN,sp|P43304|GPDM_HUMAN,sp|P06737|PYGL_HUMAN
biological_process	response to endogenous stimulus	11	0.189173	sp|Q14118|DAG1_HUMAN,sp|P02652|APOA2_HUMAN,sp|P01034|CYTC_HUMAN,sp|P00918|CAH2_HUMAN,sp|P80108|PHLD_HUMAN,sp|O43278|SPIT1_HUMAN,sp|P07355|ANXA2_HUMAN,sp|O75874|IDHC_HUMAN,sp|P02675|FIBB_HUMAN,sp|P62834|RAP1A_HUMAN,sp|O95831|AIFM1_HUMAN
biological_process	regulation of homeostatic process	5	0.192508	sp|P61769|B2MG_HUMAN,sp|P00918|CAH2_HUMAN,sp|P80108|PHLD_HUMAN,sp|P50990|TCPQ_HUMAN,sp|P02545|LMNA_HUMAN
biological_process	response to biotic stimulus	8	0.192735	sp|P61769|B2MG_HUMAN,sp|O75531|BAF_HUMAN,sp|P02671|FIBA_HUMAN,sp|P04406|G3P_HUMAN,sp|P00738|HPT_HUMAN,sp|P02675|FIBB_HUMAN,sp|P81605|DCD_HUMAN,sp|P10909|CLUS_HUMAN
biological_process	regulation of cell-cell adhesion	4	0.194307	sp|P02675|FIBB_HUMAN,sp|P02679|FIBG_HUMAN,sp|P02647|APOA1_HUMAN,sp|P02671|FIBA_HUMAN
biological_process	negative regulation of cellular protein metabolic process	11	0.197049	sp|Q9UL18|AGO1_HUMAN,sp|Q14118|DAG1_HUMAN,sp|P01034|CYTC_HUMAN,sp|Q99436|PSB7_HUMAN,sp|Q16610|ECM1_HUMAN,sp|P01023|A2MG_HUMAN,sp|P01040|CYTA_HUMAN,sp|P04406|G3P_HUMAN,sp|P07355|ANXA2_HUMAN,sp|P28066|PSA5_HUMAN,sp|P35237|SPB6_HUMAN
biological_process	positive regulation of catabolic process	6	0.198996	sp|P02652|APOA2_HUMAN,sp|Q99436|PSB7_HUMAN,sp|P28066|PSA5_HUMAN,sp|P80108|PHLD_HUMAN,sp|P55072|TERA_HUMAN,sp|P10909|CLUS_HUMAN
biological_process	positive regulation of protein catabolic process	5	0.205577	sp|Q99436|PSB7_HUMAN,sp|P28066|PSA5_HUMAN,sp|P80108|PHLD_HUMAN,sp|P55072|TERA_HUMAN,sp|P10909|CLUS_HUMAN
biological_process	negative regulation of proteolysis	5	0.205577	sp|P01034|CYTC_HUMAN,sp|Q16610|ECM1_HUMAN,sp|P01023|A2MG_HUMAN,sp|P01040|CYTA_HUMAN,sp|P35237|SPB6_HUMAN
biological_process	regulation of cellular protein catabolic process	5	0.205577	sp|P07355|ANXA2_HUMAN,sp|Q99436|PSB7_HUMAN,sp|P28066|PSA5_HUMAN,sp|P55072|TERA_HUMAN,sp|P10909|CLUS_HUMAN
biological_process	gliogenesis	3	0.207529	sp|Q14118|DAG1_HUMAN,sp|P35052|GPC1_HUMAN,sp|P10909|CLUS_HUMAN
biological_process	lymphocyte activation	3	0.207529	sp|P35579|MYH9_HUMAN,sp|P61769|B2MG_HUMAN,sp|P00492|HPRT_HUMAN
biological_process	regulation of binding	3	0.207529	sp|P07355|ANXA2_HUMAN,sp|P61769|B2MG_HUMAN,sp|P60953|CDC42_HUMAN
biological_process	modification of morphology or physiology of other organism involved in symbiotic interaction	3	0.207529	sp|P07355|ANXA2_HUMAN,sp|P04406|G3P_HUMAN,sp|Q14118|DAG1_HUMAN
biological_process	regulation of protein processing	3	0.207529	sp|P35579|MYH9_HUMAN,sp|P01023|A2MG_HUMAN,sp|P08582|TRFM_HUMAN
biological_process	regulation of protein maturation	3	0.207529	sp|P35579|MYH9_HUMAN,sp|P01023|A2MG_HUMAN,sp|P08582|TRFM_HUMAN
biological_process	cellular response to drug	4	0.209688	sp|P01034|CYTC_HUMAN,sp|P80108|PHLD_HUMAN,sp|O95831|AIFM1_HUMAN,sp|P62834|RAP1A_HUMAN
biological_process	positive regulation of proteolysis involved in cellular protein catabolic process	4	0.209688	sp|Q99436|PSB7_HUMAN,sp|P28066|PSA5_HUMAN,sp|P55072|TERA_HUMAN,sp|P10909|CLUS_HUMAN
biological_process	regulation of cysteine-type endopeptidase activity	4	0.209688	sp|P01034|CYTC_HUMAN,sp|O95831|AIFM1_HUMAN,sp|P61604|CH10_HUMAN,sp|P55072|TERA_HUMAN
biological_process	regulation of defense response	9	0.210561	sp|Q96DR8|MUCL1_HUMAN,sp|Q99436|PSB7_HUMAN,sp|P02675|FIBB_HUMAN,sp|P28066|PSA5_HUMAN,sp|P02679|FIBG_HUMAN,sp|O75326|SEM7A_HUMAN,sp|P01023|A2MG_HUMAN,sp|P02647|APOA1_HUMAN,sp|P02671|FIBA_HUMAN
biological_process	positive regulation of apoptotic process	6	0.210686	sp|P04406|G3P_HUMAN,sp|P80108|PHLD_HUMAN,sp|O95831|AIFM1_HUMAN,sp|P61604|CH10_HUMAN,sp|P55072|TERA_HUMAN,sp|P60953|CDC42_HUMAN
biological_process	positive regulation of programmed cell death	6	0.210686	sp|P04406|G3P_HUMAN,sp|P80108|PHLD_HUMAN,sp|O95831|AIFM1_HUMAN,sp|P61604|CH10_HUMAN,sp|P55072|TERA_HUMAN,sp|P60953|CDC42_HUMAN
biological_process	regulation of nervous system development	6	0.210686	sp|Q14118|DAG1_HUMAN,sp|P61769|B2MG_HUMAN,sp|Q9UL25|RAB21_HUMAN,sp|O75326|SEM7A_HUMAN,sp|P62834|RAP1A_HUMAN,sp|O43278|SPIT1_HUMAN
biological_process	eye development	2	0.212228	sp|P01034|CYTC_HUMAN,sp|P43304|GPDM_HUMAN
biological_process	'de novo' protein folding	2	0.212228	sp|P61604|CH10_HUMAN,sp|P50990|TCPQ_HUMAN
biological_process	terpenoid metabolic process	2	0.212228	sp|P02652|APOA2_HUMAN,sp|P35052|GPC1_HUMAN
biological_process	sex differentiation	2	0.212228	sp|P01034|CYTC_HUMAN,sp|O75874|IDHC_HUMAN
biological_process	regulation of telomere maintenance	2	0.212228	sp|P50990|TCPQ_HUMAN,sp|P02545|LMNA_HUMAN
biological_process	carbohydrate homeostasis	2	0.212228	sp|P06737|PYGL_HUMAN,sp|P62834|RAP1A_HUMAN
biological_process	protein localization to nucleus	2	0.212228	sp|Q14118|DAG1_HUMAN,sp|P02545|LMNA_HUMAN
biological_process	glucose homeostasis	2	0.212228	sp|P06737|PYGL_HUMAN,sp|P62834|RAP1A_HUMAN
biological_process	glycerolipid catabolic process	2	0.212228	sp|P02652|APOA2_HUMAN,sp|P0C869|PA24B_HUMAN
biological_process	regulation of extent of cell growth	2	0.212228	sp|Q9UL25|RAB21_HUMAN,sp|O75326|SEM7A_HUMAN
biological_process	response to interleukin-1	2	0.212228	sp|P02675|FIBB_HUMAN,sp|P02679|FIBG_HUMAN
biological_process	regulation of protein localization to plasma membrane	2	0.212228	sp|Q9UEU0|VTI1B_HUMAN,sp|Q96CW1|AP2M1_HUMAN
biological_process	regulation of protein localization to cell periphery	2	0.212228	sp|Q9UEU0|VTI1B_HUMAN,sp|Q96CW1|AP2M1_HUMAN
biological_process	cellular detoxification	2	0.212228	sp|P68871|HBB_HUMAN,sp|P69905|HBA_HUMAN
biological_process	response to lipid	7	0.212425	sp|Q14118|DAG1_HUMAN,sp|P02652|APOA2_HUMAN,sp|P01034|CYTC_HUMAN,sp|O75874|IDHC_HUMAN,sp|P00918|CAH2_HUMAN,sp|P80108|PHLD_HUMAN,sp|O95831|AIFM1_HUMAN
biological_process	cellular protein modification process	20	0.213683	sp|Q15018|ABRX2_HUMAN,sp|Q99436|PSB7_HUMAN,sp|P02679|FIBG_HUMAN,sp|P80108|PHLD_HUMAN,sp|P00450|CERU_HUMAN,sp|P01040|CYTA_HUMAN,sp|P02647|APOA1_HUMAN,sp|P46736|BRCC3_HUMAN,sp|P28066|PSA5_HUMAN,sp|P16870|CBPE_HUMAN,sp|P55072|TERA_HUMAN,sp|P08582|TRFM_HUMAN,sp|Q96DR8|MUCL1_HUMAN,sp|Q14118|DAG1_HUMAN,sp|P01034|CYTC_HUMAN,sp|P02652|APOA2_HUMAN,sp|P01008|ANT3_HUMAN,sp|P40926|MDHM_HUMAN,sp|P02671|FIBA_H…
biological_process	protein modification process	20	0.213683	sp|Q15018|ABRX2_HUMAN,sp|Q99436|PSB7_HUMAN,sp|P02679|FIBG_HUMAN,sp|P80108|PHLD_HUMAN,sp|P00450|CERU_HUMAN,sp|P01040|CYTA_HUMAN,sp|P02647|APOA1_HUMAN,sp|P46736|BRCC3_HUMAN,sp|P28066|PSA5_HUMAN,sp|P16870|CBPE_HUMAN,sp|P55072|TERA_HUMAN,sp|P08582|TRFM_HUMAN,sp|Q96DR8|MUCL1_HUMAN,sp|Q14118|DAG1_HUMAN,sp|P01034|CYTC_HUMAN,sp|P02652|APOA2_HUMAN,sp|P01008|ANT3_HUMAN,sp|P40926|MDHM_HUMAN,sp|P02671|FIBA_H…
biological_process	cellular process	83	0.219735	sp|P01040|CYTA_HUMAN,sp|O75874|IDHC_HUMAN,sp|P35052|GPC1_HUMAN,sp|P30740|ILEU_HUMAN,sp|P08582|TRFM_HUMAN,sp|O15296|LX15B_HUMAN,sp|O75326|SEM7A_HUMAN,sp|P0C869|PA24B_HUMAN,sp|O75787|RENR_HUMAN,sp|P02671|FIBA_HUMAN,sp|P02545|LMNA_HUMAN,sp|Q9NTM9|CUTC_HUMAN,sp|P04406|G3P_HUMAN,sp|P00738|HPT_HUMAN,sp|Q08380|LG3BP_HUMAN,sp|P19012|K1C15_HUMAN,sp|P62834|RAP1A_HUMAN,sp|P10909|CLUS_HUMAN,sp|P12081|SYHC_HU…
biological_process	positive regulation of defense response	6	0.222618	sp|Q96DR8|MUCL1_HUMAN,sp|Q99436|PSB7_HUMAN,sp|P02675|FIBB_HUMAN,sp|P28066|PSA5_HUMAN,sp|P02679|FIBG_HUMAN,sp|P02671|FIBA_HUMAN
biological_process	activation of immune response	7	0.223273	sp|Q96DR8|MUCL1_HUMAN,sp|Q99436|PSB7_HUMAN,sp|P02675|FIBB_HUMAN,sp|P28066|PSA5_HUMAN,sp|P02679|FIBG_HUMAN,sp|P80108|PHLD_HUMAN,sp|P02671|FIBA_HUMAN
biological_process	cellular modified amino acid metabolic process	4	0.225411	sp|Q3MJ16|PA24E_HUMAN,sp|O75874|IDHC_HUMAN,sp|P0C869|PA24B_HUMAN,sp|P06732|KCRM_HUMAN
biological_process	cellular response to decreased oxygen levels	4	0.225411	sp|Q99436|PSB7_HUMAN,sp|P28066|PSA5_HUMAN,sp|O95831|AIFM1_HUMAN,sp|P02545|LMNA_HUMAN
biological_process	defense response to bacterium	4	0.225411	sp|P00738|HPT_HUMAN,sp|P02675|FIBB_HUMAN,sp|P81605|DCD_HUMAN,sp|P02671|FIBA_HUMAN
biological_process	regulation of organ morphogenesis	4	0.225411	sp|Q99436|PSB7_HUMAN,sp|P28066|PSA5_HUMAN,sp|Q96CW1|AP2M1_HUMAN,sp|P60953|CDC42_HUMAN
biological_process	protein glycosylation	3	0.227007	sp|Q96DR8|MUCL1_HUMAN,sp|Q14118|DAG1_HUMAN,sp|P55072|TERA_HUMAN
biological_process	heart development	3	0.227007	sp|P16870|CBPE_HUMAN,sp|P60953|CDC42_HUMAN,sp|P02545|LMNA_HUMAN
biological_process	glycoprotein biosynthetic process	3	0.227007	sp|Q96DR8|MUCL1_HUMAN,sp|Q14118|DAG1_HUMAN,sp|P55072|TERA_HUMAN
biological_process	regulation of mitochondrion organization	3	0.227007	sp|Q99436|PSB7_HUMAN,sp|Q99536|VAT1_HUMAN,sp|P02545|LMNA_HUMAN
biological_process	macromolecule glycosylation	3	0.227007	sp|Q96DR8|MUCL1_HUMAN,sp|Q14118|DAG1_HUMAN,sp|P55072|TERA_HUMAN
biological_process	leukocyte migration	3	0.227007	sp|P35579|MYH9_HUMAN,sp|P35052|GPC1_HUMAN,sp|P60953|CDC42_HUMAN
biological_process	macromolecule modification	20	0.232302	sp|Q15018|ABRX2_HUMAN,sp|Q99436|PSB7_HUMAN,sp|P02679|FIBG_HUMAN,sp|P80108|PHLD_HUMAN,sp|P00450|CERU_HUMAN,sp|P01040|CYTA_HUMAN,sp|P02647|APOA1_HUMAN,sp|P46736|BRCC3_HUMAN,sp|P28066|PSA5_HUMAN,sp|P16870|CBPE_HUMAN,sp|P55072|TERA_HUMAN,sp|P08582|TRFM_HUMAN,sp|Q96DR8|MUCL1_HUMAN,sp|Q14118|DAG1_HUMAN,sp|P01034|CYTC_HUMAN,sp|P02652|APOA2_HUMAN,sp|P01008|ANT3_HUMAN,sp|P40926|MDHM_HUMAN,sp|P02671|FIBA_H…
biological_process	leukocyte mediated immunity	18	0.232878	sp|Q99436|PSB7_HUMAN,sp|Q9NQR4|NIT2_HUMAN,sp|O00161|SNP23_HUMAN,sp|P07355|ANXA2_HUMAN,sp|O75874|IDHC_HUMAN,sp|P28066|PSA5_HUMAN,sp|Q99536|VAT1_HUMAN,sp|P02763|A1AG1_HUMAN,sp|P50990|TCPQ_HUMAN,sp|P30740|ILEU_HUMAN,sp|P01011|AACT_HUMAN,sp|P01034|CYTC_HUMAN,sp|O75787|RENR_HUMAN,sp|P00738|HPT_HUMAN,sp|P06737|PYGL_HUMAN,sp|P62834|RAP1A_HUMAN,sp|P68871|HBB_HUMAN,sp|P35237|SPB6_HUMAN
biological_process	system process	10	0.234613	sp|P01011|AACT_HUMAN,sp|P02679|FIBG_HUMAN,sp|O75787|RENR_HUMAN,sp|P23280|CAH6_HUMAN,sp|P12273|PIP_HUMAN,sp|P02671|FIBA_HUMAN,sp|P02675|FIBB_HUMAN,sp|P68871|HBB_HUMAN,sp|P60953|CDC42_HUMAN,sp|P35237|SPB6_HUMAN
biological_process	mitotic cell cycle	6	0.234777	sp|Q15018|ABRX2_HUMAN,sp|Q99436|PSB7_HUMAN,sp|P28066|PSA5_HUMAN,sp|O75531|BAF_HUMAN,sp|Q9HC35|EMAL4_HUMAN,sp|P02545|LMNA_HUMAN
biological_process	osteoblast differentiation	2	0.239713	sp|O75326|SEM7A_HUMAN,sp|P61604|CH10_HUMAN
biological_process	protein lipidation	2	0.239713	sp|P80108|PHLD_HUMAN,sp|P08582|TRFM_HUMAN
biological_process	neurotransmitter transport	2	0.239713	sp|O00161|SNP23_HUMAN,sp|P68871|HBB_HUMAN
biological_process	nuclear envelope organization	2	0.239713	sp|O75531|BAF_HUMAN,sp|P02545|LMNA_HUMAN
biological_process	glutamine family amino acid metabolic process	2	0.239713	sp|P16930|FAAA_HUMAN,sp|Q9NQR4|NIT2_HUMAN
biological_process	negative regulation of translation	2	0.239713	sp|Q9UL18|AGO1_HUMAN,sp|P04406|G3P_HUMAN
biological_process	myeloid cell differentiation	2	0.239713	sp|P35579|MYH9_HUMAN,sp|P07355|ANXA2_HUMAN
biological_process	response to estradiol	2	0.239713	sp|P01034|CYTC_HUMAN,sp|O95831|AIFM1_HUMAN
biological_process	IRE1-mediated unfolded protein response	2	0.239713	sp|P0C869|PA24B_HUMAN,sp|P02545|LMNA_HUMAN
biological_process	negative regulation of protein catabolic process	2	0.239713	sp|P07355|ANXA2_HUMAN,sp|P01034|CYTC_HUMAN
biological_process	hydrogen peroxide catabolic process	2	0.239713	sp|P68871|HBB_HUMAN,sp|P69905|HBA_HUMAN
biological_process	positive regulation of epithelial cell proliferation	2	0.239713	sp|Q16610|ECM1_HUMAN,sp|P60953|CDC42_HUMAN
biological_process	lipid homeostasis	2	0.239713	sp|P02652|APOA2_HUMAN,sp|P02647|APOA1_HUMAN
biological_process	nucleoside phosphate catabolic process	2	0.239713	sp|P55072|TERA_HUMAN,sp|P00492|HPRT_HUMAN
biological_process	response to organic substance	24	0.240285	sp|P61769|B2MG_HUMAN,sp|Q99436|PSB7_HUMAN,sp|P02679|FIBG_HUMAN,sp|P80108|PHLD_HUMAN,sp|Q15631|TSN_HUMAN,sp|P07355|ANXA2_HUMAN,sp|O75874|IDHC_HUMAN,sp|P28066|PSA5_HUMAN,sp|P55072|TERA_HUMAN,sp|Q9UL18|AGO1_HUMAN,sp|Q14118|DAG1_HUMAN,sp|P02652|APOA2_HUMAN,sp|P01034|CYTC_HUMAN,sp|P00918|CAH2_HUMAN,sp|P0C869|PA24B_HUMAN,sp|P61604|CH10_HUMAN,sp|O43278|SPIT1_HUMAN,sp|P02545|LMNA_HUMAN,sp|P00492|HPRT_HUM…
biological_process	regulation of neurotransmitter levels	4	0.241436	sp|P62834|RAP1A_HUMAN,sp|O00161|SNP23_HUMAN,sp|P68871|HBB_HUMAN,sp|P10909|CLUS_HUMAN
biological_process	positive regulation of protein modification by small protein conjugation or removal	4	0.241436	sp|Q99436|PSB7_HUMAN,sp|P28066|PSA5_HUMAN,sp|P55072|TERA_HUMAN,sp|P10909|CLUS_HUMAN
biological_process	positive regulation of cellular protein catabolic process	4	0.241436	sp|Q99436|PSB7_HUMAN,sp|P28066|PSA5_HUMAN,sp|P55072|TERA_HUMAN,sp|P10909|CLUS_HUMAN
biological_process	coenzyme metabolic process	7	0.245551	sp|P04406|G3P_HUMAN,sp|O75874|IDHC_HUMAN,sp|P43304|GPDM_HUMAN,sp|P07195|LDHB_HUMAN,sp|A1L3X0|ELOV7_HUMAN,sp|P55072|TERA_HUMAN,sp|P40926|MDHM_HUMAN
biological_process	cell proliferation	5	0.246447	sp|Q9H190|SDCB2_HUMAN,sp|Q9UEU0|VTI1B_HUMAN,sp|P00492|HPRT_HUMAN,sp|P02647|APOA1_HUMAN,sp|P10909|CLUS_HUMAN
biological_process	positive regulation of cellular catabolic process	5	0.246447	sp|Q99436|PSB7_HUMAN,sp|P28066|PSA5_HUMAN,sp|P80108|PHLD_HUMAN,sp|P55072|TERA_HUMAN,sp|P10909|CLUS_HUMAN
biological_process	regulation of endopeptidase activity	5	0.246447	sp|P01034|CYTC_HUMAN,sp|O95831|AIFM1_HUMAN,sp|P61604|CH10_HUMAN,sp|P55072|TERA_HUMAN,sp|P35237|SPB6_HUMAN
biological_process	regulation of hemopoiesis	5	0.246447	sp|Q9UL18|AGO1_HUMAN,sp|P61769|B2MG_HUMAN,sp|Q99436|PSB7_HUMAN,sp|P28066|PSA5_HUMAN,sp|P00918|CAH2_HUMAN
biological_process	glycosylation	3	0.246827	sp|Q96DR8|MUCL1_HUMAN,sp|Q14118|DAG1_HUMAN,sp|P55072|TERA_HUMAN
biological_process	carbohydrate derivative biosynthetic process	6	0.247145	sp|Q96DR8|MUCL1_HUMAN,sp|Q14118|DAG1_HUMAN,sp|P35052|GPC1_HUMAN,sp|P06737|PYGL_HUMAN,sp|P55072|TERA_HUMAN,sp|P00492|HPRT_HUMAN
biological_process	negative regulation of nitrogen compound metabolic process	14	0.252829	sp|Q9UL18|AGO1_HUMAN,sp|Q14118|DAG1_HUMAN,sp|P01034|CYTC_HUMAN,sp|Q99436|PSB7_HUMAN,sp|Q719H9|KCTD1_HUMAN,sp|Q16610|ECM1_HUMAN,sp|P01023|A2MG_HUMAN,sp|P01040|CYTA_HUMAN,sp|P02671|FIBA_HUMAN,sp|P07355|ANXA2_HUMAN,sp|P04406|G3P_HUMAN,sp|P28066|PSA5_HUMAN,sp|P35237|SPB6_HUMAN,sp|P10909|CLUS_HUMAN
biological_process	epithelium development	14	0.252829	sp|Q14118|DAG1_HUMAN,sp|P01034|CYTC_HUMAN,sp|P00918|CAH2_HUMAN,sp|O75787|RENR_HUMAN,sp|P01040|CYTA_HUMAN,sp|O43278|SPIT1_HUMAN,sp|P50552|VASP_HUMAN,sp|P19012|K1C15_HUMAN,sp|Q9NSB4|KRT82_HUMAN,sp|P62834|RAP1A_HUMAN,sp|Q92764|KRT35_HUMAN,sp|Q14CN4|K2C72_HUMAN,sp|Q6A163|K1C39_HUMAN,sp|P60953|CDC42_HUMAN
biological_process	cell-cell signaling	8	0.253116	sp|Q9UL18|AGO1_HUMAN,sp|Q99436|PSB7_HUMAN,sp|Q96CW1|AP2M1_HUMAN,sp|O00161|SNP23_HUMAN,sp|P28066|PSA5_HUMAN,sp|P16870|CBPE_HUMAN,sp|Q9UHW9|S12A6_HUMAN,sp|P60953|CDC42_HUMAN
biological_process	cellular component assembly	21	0.257008	sp|Q15018|ABRX2_HUMAN,sp|P02679|FIBG_HUMAN,sp|O00161|SNP23_HUMAN,sp|P50552|VASP_HUMAN,sp|P02647|APOA1_HUMAN,sp|P07355|ANXA2_HUMAN,sp|P35052|GPC1_HUMAN,sp|P55072|TERA_HUMAN,sp|P50990|TCPQ_HUMAN,sp|P60953|CDC42_HUMAN,sp|Q9UL18|AGO1_HUMAN,sp|P02652|APOA2_HUMAN,sp|Q719H9|KCTD1_HUMAN,sp|P02671|FIBA_HUMAN,sp|P00492|HPRT_HUMAN,sp|Q9NTM9|CUTC_HUMAN,sp|P02675|FIBB_HUMAN,sp|O95831|AIFM1_HUMAN,sp|P68871|HBB…
biological_process	developmental process involved in reproduction	4	0.257721	sp|P01034|CYTC_HUMAN,sp|O75874|IDHC_HUMAN,sp|O43278|SPIT1_HUMAN,sp|O15296|LX15B_HUMAN
biological_process	positive regulation of kinase activity	4	0.257721	sp|Q14118|DAG1_HUMAN,sp|P62834|RAP1A_HUMAN,sp|P60953|CDC42_HUMAN,sp|P10909|CLUS_HUMAN
biological_process	non-canonical Wnt signaling pathway	4	0.257721	sp|Q9UL18|AGO1_HUMAN,sp|Q99436|PSB7_HUMAN,sp|P28066|PSA5_HUMAN,sp|Q96CW1|AP2M1_HUMAN
biological_process	microtubule-based movement	3	0.266912	sp|Q9UL25|RAB21_HUMAN,sp|Q96CW1|AP2M1_HUMAN,sp|P60953|CDC42_HUMAN
biological_process	hormone metabolic process	3	0.266912	sp|P16870|CBPE_HUMAN,sp|O75787|RENR_HUMAN,sp|P02647|APOA1_HUMAN
biological_process	regulation of reactive oxygen species metabolic process	3	0.266912	sp|P00738|HPT_HUMAN,sp|P68871|HBB_HUMAN,sp|P10909|CLUS_HUMAN
biological_process	tissue development	18	0.267191	sp|P80108|PHLD_HUMAN,sp|Q16610|ECM1_HUMAN,sp|P01040|CYTA_HUMAN,sp|P50552|VASP_HUMAN,sp|Q9NSB4|KRT82_HUMAN,sp|Q92764|KRT35_HUMAN,sp|Q6A163|K1C39_HUMAN,sp|P60953|CDC42_HUMAN,sp|P01034|CYTC_HUMAN,sp|Q14118|DAG1_HUMAN,sp|P00918|CAH2_HUMAN,sp|O75787|RENR_HUMAN,sp|O43278|SPIT1_HUMAN,sp|P02545|LMNA_HUMAN,sp|P26447|S10A4_HUMAN,sp|P19012|K1C15_HUMAN,sp|P62834|RAP1A_HUMAN,sp|Q14CN4|K2C72_HUMAN
biological_process	tRNA metabolic process	2	0.267369	sp|P49590|SYHM_HUMAN,sp|P12081|SYHC_HUMAN
biological_process	fatty acid biosynthetic process	2	0.267369	sp|A1L3X0|ELOV7_HUMAN,sp|O15296|LX15B_HUMAN
biological_process	isoprenoid metabolic process	2	0.267369	sp|P02652|APOA2_HUMAN,sp|P35052|GPC1_HUMAN
biological_process	spindle organization	2	0.267369	sp|P35579|MYH9_HUMAN,sp|Q15018|ABRX2_HUMAN
biological_process	regulation of blood pressure	2	0.267369	sp|O75787|RENR_HUMAN,sp|P68871|HBB_HUMAN
biological_process	aerobic respiration	2	0.267369	sp|O75874|IDHC_HUMAN,sp|P40926|MDHM_HUMAN
biological_process	telencephalon development	2	0.267369	sp|O75326|SEM7A_HUMAN,sp|P00492|HPRT_HUMAN
biological_process	negative regulation of cell-cell adhesion	2	0.267369	sp|P02679|FIBG_HUMAN,sp|P02647|APOA1_HUMAN
biological_process	killing of cells of other organism	2	0.267369	sp|P04406|G3P_HUMAN,sp|P81605|DCD_HUMAN
biological_process	T cell activation	2	0.267369	sp|P35579|MYH9_HUMAN,sp|P61769|B2MG_HUMAN
biological_process	positive regulation of I-kappaB kinase/NF-kappaB signaling	2	0.267369	sp|P26447|S10A4_HUMAN,sp|Q16610|ECM1_HUMAN
biological_process	disruption of cells of other organism	2	0.267369	sp|P04406|G3P_HUMAN,sp|P81605|DCD_HUMAN
biological_process	positive regulation of binding	2	0.267369	sp|P07355|ANXA2_HUMAN,sp|P61769|B2MG_HUMAN
biological_process	cellular response to chemical stimulus	21	0.270125	sp|P61769|B2MG_HUMAN,sp|Q99436|PSB7_HUMAN,sp|P02679|FIBG_HUMAN,sp|P80108|PHLD_HUMAN,sp|Q15631|TSN_HUMAN,sp|P07355|ANXA2_HUMAN,sp|P28066|PSA5_HUMAN,sp|P55072|TERA_HUMAN,sp|Q9UL18|AGO1_HUMAN,sp|Q14118|DAG1_HUMAN,sp|P01034|CYTC_HUMAN,sp|P00918|CAH2_HUMAN,sp|P0C869|PA24B_HUMAN,sp|O43278|SPIT1_HUMAN,sp|P02545|LMNA_HUMAN,sp|P04406|G3P_HUMAN,sp|P02675|FIBB_HUMAN,sp|O95831|AIFM1_HUMAN,sp|P62834|RAP1A_HUM…
biological_process	animal organ morphogenesis	4	0.274228	sp|Q14118|DAG1_HUMAN,sp|P00918|CAH2_HUMAN,sp|P16870|CBPE_HUMAN,sp|P60953|CDC42_HUMAN
biological_process	cellular response to organic substance	17	0.27529	sp|Q99436|PSB7_HUMAN,sp|P02679|FIBG_HUMAN,sp|P80108|PHLD_HUMAN,sp|Q15631|TSN_HUMAN,sp|P07355|ANXA2_HUMAN,sp|P28066|PSA5_HUMAN,sp|P55072|TERA_HUMAN,sp|Q9UL18|AGO1_HUMAN,sp|Q14118|DAG1_HUMAN,sp|P00918|CAH2_HUMAN,sp|P0C869|PA24B_HUMAN,sp|O43278|SPIT1_HUMAN,sp|P02545|LMNA_HUMAN,sp|P04406|G3P_HUMAN,sp|P02675|FIBB_HUMAN,sp|O95831|AIFM1_HUMAN,sp|P62834|RAP1A_HUMAN
biological_process	positive regulation of nucleobase-containing compound metabolic process	7	0.280229	sp|Q9UL18|AGO1_HUMAN,sp|P01034|CYTC_HUMAN,sp|P46736|BRCC3_HUMAN,sp|P55072|TERA_HUMAN,sp|P50990|TCPQ_HUMAN,sp|P60953|CDC42_HUMAN,sp|P02545|LMNA_HUMAN
biological_process	regulation of programmed cell death	13	0.284751	sp|P01034|CYTC_HUMAN,sp|P02679|FIBG_HUMAN,sp|P80108|PHLD_HUMAN,sp|P61604|CH10_HUMAN,sp|P12273|PIP_HUMAN,sp|P02545|LMNA_HUMAN,sp|P02671|FIBA_HUMAN,sp|P04406|G3P_HUMAN,sp|P02675|FIBB_HUMAN,sp|O95831|AIFM1_HUMAN,sp|P55072|TERA_HUMAN,sp|P10909|CLUS_HUMAN,sp|P60953|CDC42_HUMAN
biological_process	response to oxidative stress	6	0.285327	sp|P00738|HPT_HUMAN,sp|P01034|CYTC_HUMAN,sp|O75874|IDHC_HUMAN,sp|O95831|AIFM1_HUMAN,sp|P68871|HBB_HUMAN,sp|P69905|HBA_HUMAN
biological_process	response to toxic substance	6	0.285327	sp|P00738|HPT_HUMAN,sp|P01034|CYTC_HUMAN,sp|O95831|AIFM1_HUMAN,sp|P68871|HBB_HUMAN,sp|P69905|HBA_HUMAN,sp|P00492|HPRT_HUMAN
biological_process	regulation of cysteine-type endopeptidase activity involved in apoptotic process	3	0.287193	sp|O95831|AIFM1_HUMAN,sp|P61604|CH10_HUMAN,sp|P55072|TERA_HUMAN
biological_process	regulation of neuron death	3	0.287193	sp|O95831|AIFM1_HUMAN,sp|P60953|CDC42_HUMAN,sp|P10909|CLUS_HUMAN
biological_process	regulation of protein ubiquitination involved in ubiquitin-dependent protein catabolic process	3	0.287193	sp|Q99436|PSB7_HUMAN,sp|P28066|PSA5_HUMAN,sp|P10909|CLUS_HUMAN
biological_process	positive regulation of protein ubiquitination involved in ubiquitin-dependent protein catabolic process	3	0.287193	sp|Q99436|PSB7_HUMAN,sp|P28066|PSA5_HUMAN,sp|P10909|CLUS_HUMAN
biological_process	DNA metabolic process	4	0.290917	sp|Q15631|TSN_HUMAN,sp|P46736|BRCC3_HUMAN,sp|O75531|BAF_HUMAN,sp|P55072|TERA_HUMAN
biological_process	cellular response to oxygen levels	4	0.290917	sp|Q99436|PSB7_HUMAN,sp|P28066|PSA5_HUMAN,sp|O95831|AIFM1_HUMAN,sp|P02545|LMNA_HUMAN
biological_process	protein metabolic process	30	0.291464	sp|P49590|SYHM_HUMAN,sp|Q15018|ABRX2_HUMAN,sp|Q99436|PSB7_HUMAN,sp|P02679|FIBG_HUMAN,sp|P80108|PHLD_HUMAN,sp|P00450|CERU_HUMAN,sp|P01040|CYTA_HUMAN,sp|P12273|PIP_HUMAN,sp|P02647|APOA1_HUMAN,sp|P07355|ANXA2_HUMAN,sp|P28066|PSA5_HUMAN,sp|P46736|BRCC3_HUMAN,sp|P35052|GPC1_HUMAN,sp|P16870|CBPE_HUMAN,sp|P55072|TERA_HUMAN,sp|P08582|TRFM_HUMAN,sp|Q96DR8|MUCL1_HUMAN,sp|P35579|MYH9_HUMAN,sp|Q14118|DAG1_HU…
biological_process	long-chain fatty acid metabolic process	2	0.29503	sp|P0C869|PA24B_HUMAN,sp|O15296|LX15B_HUMAN
biological_process	gluconeogenesis	2	0.29503	sp|P43304|GPDM_HUMAN,sp|P40926|MDHM_HUMAN
biological_process	iron ion transport	2	0.29503	sp|P61769|B2MG_HUMAN,sp|P08582|TRFM_HUMAN
biological_process	negative regulation of cell migration	2	0.29503	sp|Q14118|DAG1_HUMAN,sp|O15296|LX15B_HUMAN
biological_process	regulation of insulin secretion	2	0.29503	sp|P80108|PHLD_HUMAN,sp|P62834|RAP1A_HUMAN
biological_process	modification by host of symbiont morphology or physiology	2	0.29503	sp|P07355|ANXA2_HUMAN,sp|P04406|G3P_HUMAN
biological_process	regulation of lipase activity	2	0.29503	sp|P02652|APOA2_HUMAN,sp|P02647|APOA1_HUMAN
biological_process	detoxification	2	0.29503	sp|P68871|HBB_HUMAN,sp|P69905|HBA_HUMAN
biological_process	negative regulation of cellular metabolic process	15	0.300256	sp|Q9UL18|AGO1_HUMAN,sp|Q14118|DAG1_HUMAN,sp|P01034|CYTC_HUMAN,sp|Q99436|PSB7_HUMAN,sp|Q719H9|KCTD1_HUMAN,sp|P80108|PHLD_HUMAN,sp|Q16610|ECM1_HUMAN,sp|P01023|A2MG_HUMAN,sp|P01040|CYTA_HUMAN,sp|P07355|ANXA2_HUMAN,sp|P04406|G3P_HUMAN,sp|P00738|HPT_HUMAN,sp|P28066|PSA5_HUMAN,sp|P35237|SPB6_HUMAN,sp|P10909|CLUS_HUMAN
biological_process	response to decreased oxygen levels	5	0.303881	sp|P01034|CYTC_HUMAN,sp|Q99436|PSB7_HUMAN,sp|P28066|PSA5_HUMAN,sp|O95831|AIFM1_HUMAN,sp|P02545|LMNA_HUMAN
biological_process	negative regulation of cell adhesion	3	0.307602	sp|P02679|FIBG_HUMAN,sp|P08582|TRFM_HUMAN,sp|P02647|APOA1_HUMAN
biological_process	response to nutrient	3	0.307602	sp|P01008|ANT3_HUMAN,sp|O95831|AIFM1_HUMAN,sp|P02647|APOA1_HUMAN
biological_process	positive regulation of homeostatic process	3	0.307602	sp|P00918|CAH2_HUMAN,sp|P80108|PHLD_HUMAN,sp|P50990|TCPQ_HUMAN
biological_process	glycoprotein metabolic process	4	0.307749	sp|Q96DR8|MUCL1_HUMAN,sp|Q14118|DAG1_HUMAN,sp|P35052|GPC1_HUMAN,sp|P55072|TERA_HUMAN
biological_process	protein deubiquitination	4	0.307749	sp|Q15018|ABRX2_HUMAN,sp|Q99436|PSB7_HUMAN,sp|P28066|PSA5_HUMAN,sp|P46736|BRCC3_HUMAN
biological_process	protein modification by small protein removal	4	0.307749	sp|Q15018|ABRX2_HUMAN,sp|Q99436|PSB7_HUMAN,sp|P28066|PSA5_HUMAN,sp|P46736|BRCC3_HUMAN
biological_process	phosphate-containing compound metabolic process	16	0.314737	sp|Q3MJ16|PA24E_HUMAN,sp|P02652|APOA2_HUMAN,sp|Q99436|PSB7_HUMAN,sp|P43304|GPDM_HUMAN,sp|P80108|PHLD_HUMAN,sp|P0C869|PA24B_HUMAN,sp|P40926|MDHM_HUMAN,sp|P06732|KCRM_HUMAN,sp|P00492|HPRT_HUMAN,sp|P02647|APOA1_HUMAN,sp|P04406|G3P_HUMAN,sp|O75874|IDHC_HUMAN,sp|P28066|PSA5_HUMAN,sp|P06737|PYGL_HUMAN,sp|P07195|LDHB_HUMAN,sp|P55072|TERA_HUMAN
biological_process	reproduction	7	0.316107	sp|P35579|MYH9_HUMAN,sp|P01034|CYTC_HUMAN,sp|O75874|IDHC_HUMAN,sp|P0C869|PA24B_HUMAN,sp|P50990|TCPQ_HUMAN,sp|O43278|SPIT1_HUMAN,sp|O15296|LX15B_HUMAN
biological_process	reproductive process	7	0.316107	sp|P35579|MYH9_HUMAN,sp|P01034|CYTC_HUMAN,sp|O75874|IDHC_HUMAN,sp|P0C869|PA24B_HUMAN,sp|P50990|TCPQ_HUMAN,sp|O43278|SPIT1_HUMAN,sp|O15296|LX15B_HUMAN
biological_process	cellular amino acid metabolic process	5	0.318598	sp|P49590|SYHM_HUMAN,sp|P16930|FAAA_HUMAN,sp|Q9NQR4|NIT2_HUMAN,sp|P06732|KCRM_HUMAN,sp|P12081|SYHC_HUMAN
biological_process	phosphorus metabolic process	17	0.320563	sp|Q3MJ16|PA24E_HUMAN,sp|P02652|APOA2_HUMAN,sp|Q99436|PSB7_HUMAN,sp|P43304|GPDM_HUMAN,sp|P80108|PHLD_HUMAN,sp|P0C869|PA24B_HUMAN,sp|A1L3X0|ELOV7_HUMAN,sp|P40926|MDHM_HUMAN,sp|P06732|KCRM_HUMAN,sp|P00492|HPRT_HUMAN,sp|P02647|APOA1_HUMAN,sp|P04406|G3P_HUMAN,sp|O75874|IDHC_HUMAN,sp|P28066|PSA5_HUMAN,sp|P06737|PYGL_HUMAN,sp|P07195|LDHB_HUMAN,sp|P55072|TERA_HUMAN
biological_process	regulation of cytokine-mediated signaling pathway	2	0.322554	sp|Q16610|ECM1_HUMAN,sp|P02647|APOA1_HUMAN
biological_process	icosanoid metabolic process	2	0.322554	sp|P0C869|PA24B_HUMAN,sp|O15296|LX15B_HUMAN
biological_process	transport along microtubule	2	0.322554	sp|Q9UL25|RAB21_HUMAN,sp|P60953|CDC42_HUMAN
biological_process	hexose biosynthetic process	2	0.322554	sp|P43304|GPDM_HUMAN,sp|P40926|MDHM_HUMAN
biological_process	hydrogen peroxide metabolic process	2	0.322554	sp|P68871|HBB_HUMAN,sp|P69905|HBA_HUMAN
biological_process	regulation of neuron apoptotic process	2	0.322554	sp|O95831|AIFM1_HUMAN,sp|P60953|CDC42_HUMAN
biological_process	interaction with host	2	0.322554	sp|P04406|G3P_HUMAN,sp|Q14118|DAG1_HUMAN
biological_process	regulation of response to cytokine stimulus	2	0.322554	sp|Q16610|ECM1_HUMAN,sp|P02647|APOA1_HUMAN
biological_process	regulation of proteasomal protein catabolic process	2	0.322554	sp|P55072|TERA_HUMAN,sp|P10909|CLUS_HUMAN
biological_process	cellular response to metal ion	2	0.322554	sp|P61769|B2MG_HUMAN,sp|P80108|PHLD_HUMAN
biological_process	microtubule-based transport	2	0.322554	sp|Q9UL25|RAB21_HUMAN,sp|P60953|CDC42_HUMAN
biological_process	positive regulation of reactive oxygen species metabolic process	2	0.322554	sp|P68871|HBB_HUMAN,sp|P10909|CLUS_HUMAN
biological_process	regulation of proteolysis involved in cellular protein catabolic process	4	0.324688	sp|Q99436|PSB7_HUMAN,sp|P28066|PSA5_HUMAN,sp|P55072|TERA_HUMAN,sp|P10909|CLUS_HUMAN
biological_process	cellular component biogenesis	21	0.325126	sp|Q15018|ABRX2_HUMAN,sp|P02679|FIBG_HUMAN,sp|O00161|SNP23_HUMAN,sp|P50552|VASP_HUMAN,sp|P02647|APOA1_HUMAN,sp|P07355|ANXA2_HUMAN,sp|P35052|GPC1_HUMAN,sp|P55072|TERA_HUMAN,sp|P50990|TCPQ_HUMAN,sp|P60953|CDC42_HUMAN,sp|Q9UL18|AGO1_HUMAN,sp|P02652|APOA2_HUMAN,sp|Q719H9|KCTD1_HUMAN,sp|P02671|FIBA_HUMAN,sp|P00492|HPRT_HUMAN,sp|Q9NTM9|CUTC_HUMAN,sp|P02675|FIBB_HUMAN,sp|O95831|AIFM1_HUMAN,sp|P68871|HBB…
biological_process	negative regulation of cytokine production	3	0.328073	sp|P02652|APOA2_HUMAN,sp|P02763|A1AG1_HUMAN,sp|P02647|APOA1_HUMAN
biological_process	tissue homeostasis	3	0.328073	sp|P61769|B2MG_HUMAN,sp|P01011|AACT_HUMAN,sp|P12273|PIP_HUMAN
biological_process	innate immune response activating cell surface receptor signaling pathway	3	0.328073	sp|Q96DR8|MUCL1_HUMAN,sp|Q99436|PSB7_HUMAN,sp|P28066|PSA5_HUMAN
biological_process	stimulatory C-type lectin receptor signaling pathway	3	0.328073	sp|Q96DR8|MUCL1_HUMAN,sp|Q99436|PSB7_HUMAN,sp|P28066|PSA5_HUMAN
biological_process	glucose metabolic process	3	0.328073	sp|P04406|G3P_HUMAN,sp|P43304|GPDM_HUMAN,sp|P40926|MDHM_HUMAN
biological_process	regulation of cellular amine metabolic process	3	0.328073	sp|Q99436|PSB7_HUMAN,sp|P28066|PSA5_HUMAN,sp|P00492|HPRT_HUMAN
biological_process	drug catabolic process	3	0.328073	sp|P16930|FAAA_HUMAN,sp|P68871|HBB_HUMAN,sp|P69905|HBA_HUMAN
biological_process	fatty acid derivative metabolic process	3	0.328073	sp|P0C869|PA24B_HUMAN,sp|A1L3X0|ELOV7_HUMAN,sp|O15296|LX15B_HUMAN
biological_process	signaling	26	0.329703	sp|Q99436|PSB7_HUMAN,sp|P02679|FIBG_HUMAN,sp|P80108|PHLD_HUMAN,sp|Q16610|ECM1_HUMAN,sp|O00161|SNP23_HUMAN,sp|P02647|APOA1_HUMAN,sp|P07355|ANXA2_HUMAN,sp|P28066|PSA5_HUMAN,sp|P16870|CBPE_HUMAN,sp|P60953|CDC42_HUMAN,sp|Q96DR8|MUCL1_HUMAN,sp|P35579|MYH9_HUMAN,sp|Q9UL18|AGO1_HUMAN,sp|P00918|CAH2_HUMAN,sp|O75326|SEM7A_HUMAN,sp|P0C869|PA24B_HUMAN,sp|Q96CW1|AP2M1_HUMAN,sp|O95969|SG1D2_HUMAN,sp|P02671|FI…
biological_process	cofactor metabolic process	9	0.330899	sp|P43304|GPDM_HUMAN,sp|A1L3X0|ELOV7_HUMAN,sp|P40926|MDHM_HUMAN,sp|P04406|G3P_HUMAN,sp|O75874|IDHC_HUMAN,sp|P07195|LDHB_HUMAN,sp|P68871|HBB_HUMAN,sp|P55072|TERA_HUMAN,sp|P69905|HBA_HUMAN
biological_process	signal transduction	24	0.336528	sp|Q99436|PSB7_HUMAN,sp|P02679|FIBG_HUMAN,sp|P80108|PHLD_HUMAN,sp|Q16610|ECM1_HUMAN,sp|P02647|APOA1_HUMAN,sp|P07355|ANXA2_HUMAN,sp|P28066|PSA5_HUMAN,sp|P16870|CBPE_HUMAN,sp|P60953|CDC42_HUMAN,sp|Q96DR8|MUCL1_HUMAN,sp|P35579|MYH9_HUMAN,sp|Q9UL18|AGO1_HUMAN,sp|P00918|CAH2_HUMAN,sp|O75326|SEM7A_HUMAN,sp|P0C869|PA24B_HUMAN,sp|Q96CW1|AP2M1_HUMAN,sp|O95969|SG1D2_HUMAN,sp|P02671|FIBA_HUMAN,sp|P02545|LMN…
biological_process	endocytosis	6	0.338096	sp|P35579|MYH9_HUMAN,sp|P00738|HPT_HUMAN,sp|Q96CW1|AP2M1_HUMAN,sp|P68871|HBB_HUMAN,sp|P69905|HBA_HUMAN,sp|P60953|CDC42_HUMAN
biological_process	positive regulation of transferase activity	6	0.338096	sp|Q14118|DAG1_HUMAN,sp|Q99436|PSB7_HUMAN,sp|P28066|PSA5_HUMAN,sp|P62834|RAP1A_HUMAN,sp|P60953|CDC42_HUMAN,sp|P10909|CLUS_HUMAN
biological_process	antigen processing and presentation of peptide antigen via MHC class I	4	0.341699	sp|P61769|B2MG_HUMAN,sp|Q99436|PSB7_HUMAN,sp|P28066|PSA5_HUMAN,sp|O00161|SNP23_HUMAN
biological_process	positive regulation of cell projection organization	4	0.341699	sp|Q9UL25|RAB21_HUMAN,sp|O75326|SEM7A_HUMAN,sp|P62834|RAP1A_HUMAN,sp|P60953|CDC42_HUMAN
biological_process	carboxylic acid metabolic process	12	0.347833	sp|P49590|SYHM_HUMAN,sp|P16930|FAAA_HUMAN,sp|P0C869|PA24B_HUMAN,sp|Q9NQR4|NIT2_HUMAN,sp|A1L3X0|ELOV7_HUMAN,sp|P40926|MDHM_HUMAN,sp|P06732|KCRM_HUMAN,sp|P04406|G3P_HUMAN,sp|O75874|IDHC_HUMAN,sp|P07195|LDHB_HUMAN,sp|O15296|LX15B_HUMAN,sp|P12081|SYHC_HUMAN
biological_process	response to unfolded protein	3	0.348549	sp|P0C869|PA24B_HUMAN,sp|P61604|CH10_HUMAN,sp|P02545|LMNA_HUMAN
biological_process	positive regulation of protein complex assembly	3	0.348549	sp|P55072|TERA_HUMAN,sp|P50552|VASP_HUMAN,sp|P10909|CLUS_HUMAN
biological_process	regulation of symbiosis, encompassing mutualism through parasitism	3	0.348549	sp|P07355|ANXA2_HUMAN,sp|P04406|G3P_HUMAN,sp|O75531|BAF_HUMAN
biological_process	cellular response to lipid	3	0.348549	sp|Q14118|DAG1_HUMAN,sp|P80108|PHLD_HUMAN,sp|O95831|AIFM1_HUMAN
biological_process	retina homeostasis	2	0.349817	sp|P61769|B2MG_HUMAN,sp|P12273|PIP_HUMAN
biological_process	pyruvate metabolic process	2	0.349817	sp|P04406|G3P_HUMAN,sp|P07195|LDHB_HUMAN
biological_process	vesicle fusion	2	0.349817	sp|Q9UEU0|VTI1B_HUMAN,sp|O00161|SNP23_HUMAN
biological_process	nucleus organization	2	0.349817	sp|O75531|BAF_HUMAN,sp|P02545|LMNA_HUMAN
biological_process	chemical synaptic transmission	2	0.349817	sp|O00161|SNP23_HUMAN,sp|Q9UHW9|S12A6_HUMAN
biological_process	sensory organ development	2	0.349817	sp|P01034|CYTC_HUMAN,sp|P43304|GPDM_HUMAN
biological_process	striated muscle tissue development	2	0.349817	sp|P60953|CDC42_HUMAN,sp|P02545|LMNA_HUMAN
biological_process	regulation of axonogenesis	2	0.349817	sp|Q9UL25|RAB21_HUMAN,sp|O75326|SEM7A_HUMAN
biological_process	striated muscle cell differentiation	2	0.349817	sp|P35579|MYH9_HUMAN,sp|P02545|LMNA_HUMAN
biological_process	muscle tissue development	2	0.349817	sp|P60953|CDC42_HUMAN,sp|P02545|LMNA_HUMAN
biological_process	regulation of muscle system process	2	0.349817	sp|Q14118|DAG1_HUMAN,sp|P02545|LMNA_HUMAN
biological_process	positive regulation of intracellular protein transport	2	0.349817	sp|Q99436|PSB7_HUMAN,sp|P60953|CDC42_HUMAN
biological_process	anterograde trans-synaptic signaling	2	0.349817	sp|O00161|SNP23_HUMAN,sp|Q9UHW9|S12A6_HUMAN
biological_process	synaptic signaling	2	0.349817	sp|O00161|SNP23_HUMAN,sp|Q9UHW9|S12A6_HUMAN
biological_process	trans-synaptic signaling	2	0.349817	sp|O00161|SNP23_HUMAN,sp|Q9UHW9|S12A6_HUMAN
biological_process	regulation of cellular protein localization	6	0.351504	sp|Q9UEU0|VTI1B_HUMAN,sp|Q99436|PSB7_HUMAN,sp|Q96CW1|AP2M1_HUMAN,sp|P50990|TCPQ_HUMAN,sp|P60953|CDC42_HUMAN,sp|P02545|LMNA_HUMAN
biological_process	monocarboxylic acid metabolic process	7	0.352823	sp|P04406|G3P_HUMAN,sp|O75874|IDHC_HUMAN,sp|P0C869|PA24B_HUMAN,sp|Q9NQR4|NIT2_HUMAN,sp|P07195|LDHB_HUMAN,sp|A1L3X0|ELOV7_HUMAN,sp|O15296|LX15B_HUMAN
biological_process	immune effector process	18	0.356598	sp|Q99436|PSB7_HUMAN,sp|Q9NQR4|NIT2_HUMAN,sp|O00161|SNP23_HUMAN,sp|P07355|ANXA2_HUMAN,sp|O75874|IDHC_HUMAN,sp|P28066|PSA5_HUMAN,sp|Q99536|VAT1_HUMAN,sp|P02763|A1AG1_HUMAN,sp|P50990|TCPQ_HUMAN,sp|P30740|ILEU_HUMAN,sp|P01011|AACT_HUMAN,sp|P01034|CYTC_HUMAN,sp|O75787|RENR_HUMAN,sp|P00738|HPT_HUMAN,sp|P06737|PYGL_HUMAN,sp|P62834|RAP1A_HUMAN,sp|P68871|HBB_HUMAN,sp|P35237|SPB6_HUMAN
biological_process	regulation of neuron projection development	4	0.358745	sp|P61769|B2MG_HUMAN,sp|Q9UL25|RAB21_HUMAN,sp|O75326|SEM7A_HUMAN,sp|P62834|RAP1A_HUMAN
biological_process	regulation of cellular component size	4	0.358745	sp|Q9UL25|RAB21_HUMAN,sp|O75326|SEM7A_HUMAN,sp|Q96CW1|AP2M1_HUMAN,sp|P50552|VASP_HUMAN
biological_process	response to endoplasmic reticulum stress	4	0.358745	sp|P0C869|PA24B_HUMAN,sp|O95831|AIFM1_HUMAN,sp|P55072|TERA_HUMAN,sp|P02545|LMNA_HUMAN
biological_process	response to oxygen levels	5	0.363221	sp|P01034|CYTC_HUMAN,sp|Q99436|PSB7_HUMAN,sp|P28066|PSA5_HUMAN,sp|O95831|AIFM1_HUMAN,sp|P02545|LMNA_HUMAN
biological_process	regulation of apoptotic signaling pathway	5	0.363221	sp|P02675|FIBB_HUMAN,sp|P02679|FIBG_HUMAN,sp|P10909|CLUS_HUMAN,sp|P02545|LMNA_HUMAN,sp|P02671|FIBA_HUMAN
biological_process	cell cycle	8	0.364481	sp|P35579|MYH9_HUMAN,sp|Q15018|ABRX2_HUMAN,sp|Q99436|PSB7_HUMAN,sp|P28066|PSA5_HUMAN,sp|P46736|BRCC3_HUMAN,sp|O75531|BAF_HUMAN,sp|Q9HC35|EMAL4_HUMAN,sp|P02545|LMNA_HUMAN
biological_process	cellular response to stress	13	0.372818	sp|Q14118|DAG1_HUMAN,sp|P01034|CYTC_HUMAN,sp|Q99436|PSB7_HUMAN,sp|P00918|CAH2_HUMAN,sp|P0C869|PA24B_HUMAN,sp|P02647|APOA1_HUMAN,sp|P02545|LMNA_HUMAN,sp|P46736|BRCC3_HUMAN,sp|P28066|PSA5_HUMAN,sp|O95831|AIFM1_HUMAN,sp|P55072|TERA_HUMAN,sp|Q9UHW9|S12A6_HUMAN,sp|P35237|SPB6_HUMAN
biological_process	chemical homeostasis	9	0.374027	sp|P61769|B2MG_HUMAN,sp|P02652|APOA2_HUMAN,sp|P00918|CAH2_HUMAN,sp|P00450|CERU_HUMAN,sp|P02647|APOA1_HUMAN,sp|Q9NTM9|CUTC_HUMAN,sp|P06737|PYGL_HUMAN,sp|P62834|RAP1A_HUMAN,sp|P08582|TRFM_HUMAN
biological_process	cellular component disassembly	4	0.375795	sp|O75531|BAF_HUMAN,sp|P01023|A2MG_HUMAN,sp|P55072|TERA_HUMAN,sp|P02545|LMNA_HUMAN
biological_process	regulation of protein modification by small protein conjugation or removal	4	0.375795	sp|Q99436|PSB7_HUMAN,sp|P28066|PSA5_HUMAN,sp|P55072|TERA_HUMAN,sp|P10909|CLUS_HUMAN
biological_process	in utero embryonic development	2	0.376715	sp|P35579|MYH9_HUMAN,sp|O43278|SPIT1_HUMAN
biological_process	vacuolar transport	2	0.376715	sp|Q9UEU0|VTI1B_HUMAN,sp|P55072|TERA_HUMAN
biological_process	regulation of cell shape	2	0.376715	sp|P35579|MYH9_HUMAN,sp|Q14118|DAG1_HUMAN
biological_process	regulation of cell size	2	0.376715	sp|Q9UL25|RAB21_HUMAN,sp|O75326|SEM7A_HUMAN
biological_process	negative regulation of cell development	2	0.376715	sp|P61769|B2MG_HUMAN,sp|P08582|TRFM_HUMAN
biological_process	endoplasmic reticulum unfolded protein response	2	0.376715	sp|P0C869|PA24B_HUMAN,sp|P02545|LMNA_HUMAN
biological_process	regulation of chromosome organization	2	0.376715	sp|P50990|TCPQ_HUMAN,sp|P02545|LMNA_HUMAN
biological_process	cellular response to unfolded protein	2	0.376715	sp|P0C869|PA24B_HUMAN,sp|P02545|LMNA_HUMAN
biological_process	muscle cell differentiation	2	0.376715	sp|P35579|MYH9_HUMAN,sp|P02545|LMNA_HUMAN
biological_process	regulation of small GTPase mediated signal transduction	2	0.376715	sp|P01023|A2MG_HUMAN,sp|P02647|APOA1_HUMAN
biological_process	negative regulation of protein transport	2	0.376715	sp|P02652|APOA2_HUMAN,sp|P02647|APOA1_HUMAN
biological_process	detection of stimulus	2	0.376715	sp|P23280|CAH6_HUMAN,sp|P12273|PIP_HUMAN
biological_process	antimicrobial humoral immune response mediated by antimicrobial peptide	2	0.376715	sp|P04406|G3P_HUMAN,sp|P81605|DCD_HUMAN
biological_process	organelle membrane fusion	2	0.376715	sp|Q9UEU0|VTI1B_HUMAN,sp|O00161|SNP23_HUMAN
biological_process	positive regulation of vasculature development	2	0.376715	sp|Q16610|ECM1_HUMAN,sp|P62834|RAP1A_HUMAN
biological_process	negative regulation of establishment of protein localization	2	0.376715	sp|P02652|APOA2_HUMAN,sp|P02647|APOA1_HUMAN
biological_process	lipid biosynthetic process	5	0.378176	sp|P02652|APOA2_HUMAN,sp|P0C869|PA24B_HUMAN,sp|A1L3X0|ELOV7_HUMAN,sp|P02647|APOA1_HUMAN,sp|O15296|LX15B_HUMAN
biological_process	response to bacterium	5	0.378176	sp|P00738|HPT_HUMAN,sp|P61769|B2MG_HUMAN,sp|P02675|FIBB_HUMAN,sp|P81605|DCD_HUMAN,sp|P02671|FIBA_HUMAN
biological_process	cell migration	5	0.378176	sp|P35579|MYH9_HUMAN,sp|P80108|PHLD_HUMAN,sp|P35052|GPC1_HUMAN,sp|P60953|CDC42_HUMAN,sp|P02647|APOA1_HUMAN
biological_process	organonitrogen compound biosynthetic process	13	0.381911	sp|Q96DR8|MUCL1_HUMAN,sp|P49590|SYHM_HUMAN,sp|Q14118|DAG1_HUMAN,sp|P02652|APOA2_HUMAN,sp|P80108|PHLD_HUMAN,sp|A1L3X0|ELOV7_HUMAN,sp|P06732|KCRM_HUMAN,sp|P00492|HPRT_HUMAN,sp|P02647|APOA1_HUMAN,sp|P35052|GPC1_HUMAN,sp|P55072|TERA_HUMAN,sp|P08582|TRFM_HUMAN,sp|P12081|SYHC_HUMAN
biological_process	regulation of apoptotic process	12	0.385418	sp|P02679|FIBG_HUMAN,sp|P80108|PHLD_HUMAN,sp|P61604|CH10_HUMAN,sp|P12273|PIP_HUMAN,sp|P02545|LMNA_HUMAN,sp|P02671|FIBA_HUMAN,sp|P04406|G3P_HUMAN,sp|P02675|FIBB_HUMAN,sp|O95831|AIFM1_HUMAN,sp|P55072|TERA_HUMAN,sp|P10909|CLUS_HUMAN,sp|P60953|CDC42_HUMAN
biological_process	steroid metabolic process	3	0.389295	sp|P02652|APOA2_HUMAN,sp|P02774|VTDB_HUMAN,sp|P02647|APOA1_HUMAN
biological_process	positive regulation of neuron projection development	3	0.389295	sp|Q9UL25|RAB21_HUMAN,sp|O75326|SEM7A_HUMAN,sp|P62834|RAP1A_HUMAN
biological_process	positive regulation of Wnt signaling pathway	3	0.389295	sp|Q99436|PSB7_HUMAN,sp|P28066|PSA5_HUMAN,sp|O75787|RENR_HUMAN
biological_process	Wnt signaling pathway, planar cell polarity pathway	3	0.389295	sp|Q99436|PSB7_HUMAN,sp|P28066|PSA5_HUMAN,sp|Q96CW1|AP2M1_HUMAN
biological_process	regulation of establishment of planar polarity	3	0.389295	sp|Q99436|PSB7_HUMAN,sp|P28066|PSA5_HUMAN,sp|Q96CW1|AP2M1_HUMAN
biological_process	ion homeostasis	6	0.39197	sp|Q9NTM9|CUTC_HUMAN,sp|P61769|B2MG_HUMAN,sp|P00918|CAH2_HUMAN,sp|P00450|CERU_HUMAN,sp|P08582|TRFM_HUMAN,sp|P02647|APOA1_HUMAN
biological_process	immune response-activating cell surface receptor signaling pathway	4	0.392817	sp|Q96DR8|MUCL1_HUMAN,sp|Q99436|PSB7_HUMAN,sp|P28066|PSA5_HUMAN,sp|P80108|PHLD_HUMAN
biological_process	mitotic cell cycle process	5	0.393133	sp|Q15018|ABRX2_HUMAN,sp|Q99436|PSB7_HUMAN,sp|P28066|PSA5_HUMAN,sp|O75531|BAF_HUMAN,sp|P02545|LMNA_HUMAN
biological_process	response to nitrogen compound	9	0.395843	sp|Q9UL18|AGO1_HUMAN,sp|Q14118|DAG1_HUMAN,sp|P00918|CAH2_HUMAN,sp|P80108|PHLD_HUMAN,sp|P00492|HPRT_HUMAN,sp|Q15631|TSN_HUMAN,sp|P62834|RAP1A_HUMAN,sp|O95831|AIFM1_HUMAN,sp|P55072|TERA_HUMAN
biological_process	macromolecule metabolic process	36	0.397106	sp|P49590|SYHM_HUMAN,sp|Q15018|ABRX2_HUMAN,sp|Q99436|PSB7_HUMAN,sp|P80108|PHLD_HUMAN,sp|P01040|CYTA_HUMAN,sp|P12273|PIP_HUMAN,sp|P07355|ANXA2_HUMAN,sp|P35052|GPC1_HUMAN,sp|P08582|TRFM_HUMAN,sp|P35579|MYH9_HUMAN,sp|P02652|APOA2_HUMAN,sp|P01034|CYTC_HUMAN,sp|O75787|RENR_HUMAN,sp|P40926|MDHM_HUMAN,sp|P02671|FIBA_HUMAN,sp|P04406|G3P_HUMAN,sp|P06737|PYGL_HUMAN,sp|P12081|SYHC_HUMAN,sp|O75531|BAF_HUMAN,…
biological_process	cellular macromolecular complex assembly	7	0.402467	sp|Q9UL18|AGO1_HUMAN,sp|P02675|FIBB_HUMAN,sp|P02679|FIBG_HUMAN,sp|O95831|AIFM1_HUMAN,sp|O00161|SNP23_HUMAN,sp|P10909|CLUS_HUMAN,sp|P02671|FIBA_HUMAN
biological_process	response to virus	2	0.403159	sp|O75531|BAF_HUMAN,sp|P10909|CLUS_HUMAN
biological_process	positive regulation of transmembrane transport	2	0.403159	sp|P61769|B2MG_HUMAN,sp|P00918|CAH2_HUMAN
biological_process	negative regulation of multi-organism process	2	0.403159	sp|P07355|ANXA2_HUMAN,sp|O75531|BAF_HUMAN
biological_process	organelle fusion	2	0.403159	sp|Q9UEU0|VTI1B_HUMAN,sp|O00161|SNP23_HUMAN
biological_process	interaction with symbiont	2	0.403159	sp|P07355|ANXA2_HUMAN,sp|P04406|G3P_HUMAN
biological_process	monocarboxylic acid biosynthetic process	2	0.403159	sp|A1L3X0|ELOV7_HUMAN,sp|O15296|LX15B_HUMAN
biological_process	positive regulation of supramolecular fiber organization	2	0.403159	sp|P50552|VASP_HUMAN,sp|P02647|APOA1_HUMAN
biological_process	negative regulation of cell motility	2	0.403159	sp|Q14118|DAG1_HUMAN,sp|O15296|LX15B_HUMAN
biological_process	import into cell	6	0.405486	sp|P35579|MYH9_HUMAN,sp|P00738|HPT_HUMAN,sp|Q96CW1|AP2M1_HUMAN,sp|P68871|HBB_HUMAN,sp|P69905|HBA_HUMAN,sp|P60953|CDC42_HUMAN
biological_process	positive regulation of organelle organization	5	0.408073	sp|P07355|ANXA2_HUMAN,sp|Q99436|PSB7_HUMAN,sp|P50990|TCPQ_HUMAN,sp|P50552|VASP_HUMAN,sp|P02647|APOA1_HUMAN
biological_process	multi-organism process	17	0.408365	sp|P61769|B2MG_HUMAN,sp|Q99436|PSB7_HUMAN,sp|O75531|BAF_HUMAN,sp|P07355|ANXA2_HUMAN,sp|P55072|TERA_HUMAN,sp|P50990|TCPQ_HUMAN,sp|P01034|CYTC_HUMAN,sp|P02652|APOA2_HUMAN,sp|Q14118|DAG1_HUMAN,sp|P0C869|PA24B_HUMAN,sp|Q96CW1|AP2M1_HUMAN,sp|P02671|FIBA_HUMAN,sp|P00738|HPT_HUMAN,sp|P04406|G3P_HUMAN,sp|P02675|FIBB_HUMAN,sp|P81605|DCD_HUMAN,sp|P10909|CLUS_HUMAN
biological_process	macromolecule biosynthetic process	11	0.408736	sp|Q96DR8|MUCL1_HUMAN,sp|P49590|SYHM_HUMAN,sp|Q9UL18|AGO1_HUMAN,sp|Q14118|DAG1_HUMAN,sp|Q719H9|KCTD1_HUMAN,sp|P80108|PHLD_HUMAN,sp|P02647|APOA1_HUMAN,sp|P35052|GPC1_HUMAN,sp|P08582|TRFM_HUMAN,sp|P55072|TERA_HUMAN,sp|P12081|SYHC_HUMAN
biological_process	hemopoiesis	3	0.409466	sp|P35579|MYH9_HUMAN,sp|P07355|ANXA2_HUMAN,sp|P61769|B2MG_HUMAN
biological_process	cellular response to hypoxia	3	0.409466	sp|Q99436|PSB7_HUMAN,sp|P28066|PSA5_HUMAN,sp|P02545|LMNA_HUMAN
biological_process	regulation of supramolecular fiber organization	3	0.409466	sp|P50552|VASP_HUMAN,sp|P02647|APOA1_HUMAN,sp|P10909|CLUS_HUMAN
biological_process	protein folding	4	0.409781	sp|P61769|B2MG_HUMAN,sp|P61604|CH10_HUMAN,sp|P50990|TCPQ_HUMAN,sp|P10909|CLUS_HUMAN
biological_process	negative regulation of cell proliferation	4	0.409781	sp|P80108|PHLD_HUMAN,sp|O43278|SPIT1_HUMAN,sp|P02545|LMNA_HUMAN,sp|O15296|LX15B_HUMAN
biological_process	peptidyl-amino acid modification	4	0.409781	sp|P04406|G3P_HUMAN,sp|P02652|APOA2_HUMAN,sp|P55072|TERA_HUMAN,sp|P02647|APOA1_HUMAN
biological_process	cell communication	26	0.411198	sp|Q99436|PSB7_HUMAN,sp|P02679|FIBG_HUMAN,sp|P80108|PHLD_HUMAN,sp|Q16610|ECM1_HUMAN,sp|O00161|SNP23_HUMAN,sp|P02647|APOA1_HUMAN,sp|P07355|ANXA2_HUMAN,sp|P28066|PSA5_HUMAN,sp|P16870|CBPE_HUMAN,sp|P60953|CDC42_HUMAN,sp|Q96DR8|MUCL1_HUMAN,sp|P35579|MYH9_HUMAN,sp|Q9UL18|AGO1_HUMAN,sp|P00918|CAH2_HUMAN,sp|O75326|SEM7A_HUMAN,sp|P0C869|PA24B_HUMAN,sp|Q96CW1|AP2M1_HUMAN,sp|O95969|SG1D2_HUMAN,sp|P02671|FI…
biological_process	positive regulation of macromolecule biosynthetic process	6	0.418989	sp|Q9UL18|AGO1_HUMAN,sp|P02652|APOA2_HUMAN,sp|P01034|CYTC_HUMAN,sp|P50990|TCPQ_HUMAN,sp|P60953|CDC42_HUMAN,sp|P02545|LMNA_HUMAN
biological_process	regulation of cellular biosynthetic process	16	0.421394	sp|Q99436|PSB7_HUMAN,sp|P80108|PHLD_HUMAN,sp|Q16610|ECM1_HUMAN,sp|O75874|IDHC_HUMAN,sp|P28066|PSA5_HUMAN,sp|P55072|TERA_HUMAN,sp|P50990|TCPQ_HUMAN,sp|P60953|CDC42_HUMAN,sp|Q9UL18|AGO1_HUMAN,sp|P01034|CYTC_HUMAN,sp|P02652|APOA2_HUMAN,sp|Q719H9|KCTD1_HUMAN,sp|P02545|LMNA_HUMAN,sp|P04406|G3P_HUMAN,sp|P68871|HBB_HUMAN,sp|P10909|CLUS_HUMAN
biological_process	oxoacid metabolic process	12	0.423483	sp|P49590|SYHM_HUMAN,sp|P16930|FAAA_HUMAN,sp|P0C869|PA24B_HUMAN,sp|Q9NQR4|NIT2_HUMAN,sp|A1L3X0|ELOV7_HUMAN,sp|P40926|MDHM_HUMAN,sp|P06732|KCRM_HUMAN,sp|P04406|G3P_HUMAN,sp|O75874|IDHC_HUMAN,sp|P07195|LDHB_HUMAN,sp|O15296|LX15B_HUMAN,sp|P12081|SYHC_HUMAN
biological_process	regulation of neuron differentiation	4	0.426658	sp|P61769|B2MG_HUMAN,sp|Q9UL25|RAB21_HUMAN,sp|O75326|SEM7A_HUMAN,sp|P62834|RAP1A_HUMAN
biological_process	negative regulation of cell cycle	4	0.426658	sp|Q99436|PSB7_HUMAN,sp|P28066|PSA5_HUMAN,sp|P46736|BRCC3_HUMAN,sp|O15296|LX15B_HUMAN
biological_process	nucleotide metabolic process	7	0.427354	sp|P04406|G3P_HUMAN,sp|O75874|IDHC_HUMAN,sp|P43304|GPDM_HUMAN,sp|P07195|LDHB_HUMAN,sp|P55072|TERA_HUMAN,sp|P40926|MDHM_HUMAN,sp|P00492|HPRT_HUMAN
biological_process	movement of cell or subcellular component	9	0.42869	sp|P35579|MYH9_HUMAN,sp|Q14118|DAG1_HUMAN,sp|P80108|PHLD_HUMAN,sp|Q9UL25|RAB21_HUMAN,sp|P35052|GPC1_HUMAN,sp|Q96CW1|AP2M1_HUMAN,sp|P50552|VASP_HUMAN,sp|P60953|CDC42_HUMAN,sp|P02647|APOA1_HUMAN
biological_process	cholesterol metabolic process	2	0.429075	sp|P02652|APOA2_HUMAN,sp|P02647|APOA1_HUMAN
biological_process	regulation of steroid metabolic process	2	0.429075	sp|P02652|APOA2_HUMAN,sp|P02647|APOA1_HUMAN
biological_process	cytoskeleton-dependent intracellular transport	2	0.429075	sp|Q9UL25|RAB21_HUMAN,sp|P60953|CDC42_HUMAN
biological_process	forebrain development	2	0.429075	sp|O75326|SEM7A_HUMAN,sp|P00492|HPRT_HUMAN
biological_process	cellular response to reactive oxygen species	2	0.429075	sp|P01034|CYTC_HUMAN,sp|O95831|AIFM1_HUMAN
biological_process	negative regulation of locomotion	2	0.429075	sp|Q14118|DAG1_HUMAN,sp|O15296|LX15B_HUMAN
biological_process	regulation of I-kappaB kinase/NF-kappaB signaling	2	0.429075	sp|P26447|S10A4_HUMAN,sp|Q16610|ECM1_HUMAN
biological_process	monosaccharide biosynthetic process	2	0.429075	sp|P43304|GPDM_HUMAN,sp|P40926|MDHM_HUMAN
biological_process	ribose phosphate biosynthetic process	2	0.429075	sp|P06737|PYGL_HUMAN,sp|P00492|HPRT_HUMAN
biological_process	nuclear import	2	0.429075	sp|Q14118|DAG1_HUMAN,sp|P02545|LMNA_HUMAN
biological_process	protein homotetramerization	2	0.429075	sp|P50552|VASP_HUMAN,sp|P00492|HPRT_HUMAN
biological_process	positive regulation of cytoskeleton organization	2	0.429075	sp|P50552|VASP_HUMAN,sp|P02647|APOA1_HUMAN
biological_process	secondary alcohol metabolic process	2	0.429075	sp|P02652|APOA2_HUMAN,sp|P02647|APOA1_HUMAN
biological_process	sensory perception	3	0.429443	sp|P23280|CAH6_HUMAN,sp|P35237|SPB6_HUMAN,sp|P12273|PIP_HUMAN
biological_process	positive regulation of protein ubiquitination	3	0.429443	sp|Q99436|PSB7_HUMAN,sp|P28066|PSA5_HUMAN,sp|P10909|CLUS_HUMAN
biological_process	ncRNA metabolic process	3	0.429443	sp|P49590|SYHM_HUMAN,sp|Q9UL18|AGO1_HUMAN,sp|P12081|SYHC_HUMAN
biological_process	positive regulation of protein kinase activity	3	0.429443	sp|Q14118|DAG1_HUMAN,sp|P62834|RAP1A_HUMAN,sp|P10909|CLUS_HUMAN
biological_process	hematopoietic or lymphoid organ development	3	0.429443	sp|P35579|MYH9_HUMAN,sp|P07355|ANXA2_HUMAN,sp|P61769|B2MG_HUMAN
biological_process	regulation of morphogenesis of an epithelium	3	0.429443	sp|Q99436|PSB7_HUMAN,sp|P28066|PSA5_HUMAN,sp|Q96CW1|AP2M1_HUMAN
biological_process	organic acid metabolic process	12	0.433032	sp|P49590|SYHM_HUMAN,sp|P16930|FAAA_HUMAN,sp|P0C869|PA24B_HUMAN,sp|Q9NQR4|NIT2_HUMAN,sp|A1L3X0|ELOV7_HUMAN,sp|P40926|MDHM_HUMAN,sp|P06732|KCRM_HUMAN,sp|P04406|G3P_HUMAN,sp|O75874|IDHC_HUMAN,sp|P07195|LDHB_HUMAN,sp|O15296|LX15B_HUMAN,sp|P12081|SYHC_HUMAN
biological_process	cell motility	5	0.437816	sp|P35579|MYH9_HUMAN,sp|P80108|PHLD_HUMAN,sp|P35052|GPC1_HUMAN,sp|P60953|CDC42_HUMAN,sp|P02647|APOA1_HUMAN
biological_process	localization of cell	5	0.437816	sp|P35579|MYH9_HUMAN,sp|P80108|PHLD_HUMAN,sp|P35052|GPC1_HUMAN,sp|P60953|CDC42_HUMAN,sp|P02647|APOA1_HUMAN
biological_process	regulation of plasma membrane bounded cell projection organization	5	0.437816	sp|P61769|B2MG_HUMAN,sp|Q9UL25|RAB21_HUMAN,sp|O75326|SEM7A_HUMAN,sp|P62834|RAP1A_HUMAN,sp|P60953|CDC42_HUMAN
biological_process	regulation of cellular component biogenesis	7	0.439771	sp|Q14118|DAG1_HUMAN,sp|P62834|RAP1A_HUMAN,sp|P55072|TERA_HUMAN,sp|P50552|VASP_HUMAN,sp|P60953|CDC42_HUMAN,sp|P02647|APOA1_HUMAN,sp|P10909|CLUS_HUMAN
biological_process	organic substance transport	17	0.441117	sp|Q9UEU0|VTI1B_HUMAN,sp|P02679|FIBG_HUMAN,sp|O00161|SNP23_HUMAN,sp|P23280|CAH6_HUMAN,sp|P02647|APOA1_HUMAN,sp|P55072|TERA_HUMAN,sp|P35579|MYH9_HUMAN,sp|P02652|APOA2_HUMAN,sp|Q14118|DAG1_HUMAN,sp|P00918|CAH2_HUMAN,sp|Q96CW1|AP2M1_HUMAN,sp|P02545|LMNA_HUMAN,sp|Q9UL25|RAB21_HUMAN,sp|P62834|RAP1A_HUMAN,sp|P68871|HBB_HUMAN,sp|P69905|HBA_HUMAN,sp|P10909|CLUS_HUMAN
biological_process	immune response-regulating cell surface receptor signaling pathway	4	0.443421	sp|Q96DR8|MUCL1_HUMAN,sp|Q99436|PSB7_HUMAN,sp|P28066|PSA5_HUMAN,sp|P80108|PHLD_HUMAN
biological_process	regulation of protein kinase activity	4	0.443421	sp|Q14118|DAG1_HUMAN,sp|P62834|RAP1A_HUMAN,sp|P60953|CDC42_HUMAN,sp|P10909|CLUS_HUMAN
biological_process	protein homooligomerization	4	0.443421	sp|Q719H9|KCTD1_HUMAN,sp|P55072|TERA_HUMAN,sp|P50552|VASP_HUMAN,sp|P00492|HPRT_HUMAN
biological_process	cell surface receptor signaling pathway	13	0.446171	sp|Q96DR8|MUCL1_HUMAN,sp|P35579|MYH9_HUMAN,sp|Q9UL18|AGO1_HUMAN,sp|Q99436|PSB7_HUMAN,sp|P80108|PHLD_HUMAN,sp|O75326|SEM7A_HUMAN,sp|Q96CW1|AP2M1_HUMAN,sp|P02647|APOA1_HUMAN,sp|P07355|ANXA2_HUMAN,sp|P28066|PSA5_HUMAN,sp|P16870|CBPE_HUMAN,sp|P62834|RAP1A_HUMAN,sp|P60953|CDC42_HUMAN
biological_process	gene expression	11	0.448497	sp|P49590|SYHM_HUMAN,sp|Q9UL18|AGO1_HUMAN,sp|Q2TAY7|SMU1_HUMAN,sp|Q719H9|KCTD1_HUMAN,sp|P02679|FIBG_HUMAN,sp|O75787|RENR_HUMAN,sp|P02671|FIBA_HUMAN,sp|Q15631|TSN_HUMAN,sp|P02675|FIBB_HUMAN,sp|P16870|CBPE_HUMAN,sp|P12081|SYHC_HUMAN
biological_process	antigen processing and presentation of exogenous peptide antigen via MHC class I, TAP-dependent	3	0.449188	sp|Q99436|PSB7_HUMAN,sp|P28066|PSA5_HUMAN,sp|O00161|SNP23_HUMAN
biological_process	regulation of Wnt signaling pathway	3	0.449188	sp|Q99436|PSB7_HUMAN,sp|P28066|PSA5_HUMAN,sp|O75787|RENR_HUMAN
biological_process	positive regulation of neuron differentiation	3	0.449188	sp|Q9UL25|RAB21_HUMAN,sp|O75326|SEM7A_HUMAN,sp|P62834|RAP1A_HUMAN
biological_process	regulation of biosynthetic process	17	0.449327	sp|Q99436|PSB7_HUMAN,sp|P80108|PHLD_HUMAN,sp|Q16610|ECM1_HUMAN,sp|O75874|IDHC_HUMAN,sp|P28066|PSA5_HUMAN,sp|P55072|TERA_HUMAN,sp|P50990|TCPQ_HUMAN,sp|P60953|CDC42_HUMAN,sp|Q9UL18|AGO1_HUMAN,sp|P01034|CYTC_HUMAN,sp|P02652|APOA2_HUMAN,sp|Q719H9|KCTD1_HUMAN,sp|P02545|LMNA_HUMAN,sp|P04406|G3P_HUMAN,sp|P62834|RAP1A_HUMAN,sp|P68871|HBB_HUMAN,sp|P10909|CLUS_HUMAN
biological_process	nucleoside phosphate metabolic process	7	0.452156	sp|P04406|G3P_HUMAN,sp|O75874|IDHC_HUMAN,sp|P43304|GPDM_HUMAN,sp|P07195|LDHB_HUMAN,sp|P55072|TERA_HUMAN,sp|P40926|MDHM_HUMAN,sp|P00492|HPRT_HUMAN
biological_process	antigen processing and presentation of exogenous peptide antigen	5	0.452582	sp|P61769|B2MG_HUMAN,sp|Q99436|PSB7_HUMAN,sp|P28066|PSA5_HUMAN,sp|Q96CW1|AP2M1_HUMAN,sp|O00161|SNP23_HUMAN
biological_process	antigen processing and presentation of exogenous antigen	5	0.452582	sp|P61769|B2MG_HUMAN,sp|Q99436|PSB7_HUMAN,sp|P28066|PSA5_HUMAN,sp|Q96CW1|AP2M1_HUMAN,sp|O00161|SNP23_HUMAN
biological_process	regulation of cell projection organization	5	0.452582	sp|P61769|B2MG_HUMAN,sp|Q9UL25|RAB21_HUMAN,sp|O75326|SEM7A_HUMAN,sp|P62834|RAP1A_HUMAN,sp|P60953|CDC42_HUMAN
biological_process	urogenital system development	2	0.454402	sp|P00918|CAH2_HUMAN,sp|O15296|LX15B_HUMAN
biological_process	cell killing	2	0.454402	sp|P04406|G3P_HUMAN,sp|P81605|DCD_HUMAN
biological_process	vesicle budding from membrane	2	0.454402	sp|P07355|ANXA2_HUMAN,sp|Q96CW1|AP2M1_HUMAN
biological_process	locomotory behavior	2	0.454402	sp|Q9HB07|MYG1_HUMAN,sp|P00492|HPRT_HUMAN
biological_process	sterol metabolic process	2	0.454402	sp|P02652|APOA2_HUMAN,sp|P02647|APOA1_HUMAN
biological_process	response to corticosteroid	2	0.454402	sp|P02652|APOA2_HUMAN,sp|O95831|AIFM1_HUMAN
biological_process	negative regulation of cellular component movement	2	0.454402	sp|Q14118|DAG1_HUMAN,sp|O15296|LX15B_HUMAN
biological_process	membrane organization	10	0.454769	sp|P35579|MYH9_HUMAN,sp|Q9UEU0|VTI1B_HUMAN,sp|O75531|BAF_HUMAN,sp|Q96CW1|AP2M1_HUMAN,sp|O00161|SNP23_HUMAN,sp|P02545|LMNA_HUMAN,sp|P07355|ANXA2_HUMAN,sp|Q9UL25|RAB21_HUMAN,sp|P10909|CLUS_HUMAN,sp|P60953|CDC42_HUMAN
biological_process	small molecule metabolic process	20	0.456359	sp|P49590|SYHM_HUMAN,sp|P43304|GPDM_HUMAN,sp|P16930|FAAA_HUMAN,sp|Q9NQR4|NIT2_HUMAN,sp|A1L3X0|ELOV7_HUMAN,sp|P02774|VTDB_HUMAN,sp|P23280|CAH6_HUMAN,sp|P02647|APOA1_HUMAN,sp|O75874|IDHC_HUMAN,sp|P07195|LDHB_HUMAN,sp|P55072|TERA_HUMAN,sp|O15296|LX15B_HUMAN,sp|P02652|APOA2_HUMAN,sp|P00918|CAH2_HUMAN,sp|P0C869|PA24B_HUMAN,sp|P40926|MDHM_HUMAN,sp|P00492|HPRT_HUMAN,sp|P06732|KCRM_HUMAN,sp|P04406|G3P_HU…
biological_process	keratinization	7	0.464497	sp|Q9NSB4|KRT82_HUMAN,sp|P19012|K1C15_HUMAN,sp|P01040|CYTA_HUMAN,sp|Q92764|KRT35_HUMAN,sp|Q14CN4|K2C72_HUMAN,sp|Q6A163|K1C39_HUMAN,sp|P60953|CDC42_HUMAN
biological_process	immune system development	3	0.468665	sp|P35579|MYH9_HUMAN,sp|P07355|ANXA2_HUMAN,sp|P61769|B2MG_HUMAN
biological_process	cornification	6	0.472579	sp|Q9NSB4|KRT82_HUMAN,sp|P19012|K1C15_HUMAN,sp|P01040|CYTA_HUMAN,sp|Q92764|KRT35_HUMAN,sp|Q14CN4|K2C72_HUMAN,sp|Q6A163|K1C39_HUMAN
biological_process	cellular macromolecule biosynthetic process	10	0.475484	sp|Q96DR8|MUCL1_HUMAN,sp|P49590|SYHM_HUMAN,sp|Q9UL18|AGO1_HUMAN,sp|Q14118|DAG1_HUMAN,sp|Q719H9|KCTD1_HUMAN,sp|P80108|PHLD_HUMAN,sp|P02647|APOA1_HUMAN,sp|P08582|TRFM_HUMAN,sp|P55072|TERA_HUMAN,sp|P12081|SYHC_HUMAN
biological_process	embryo development	4	0.476511	sp|P35579|MYH9_HUMAN,sp|O75787|RENR_HUMAN,sp|O43278|SPIT1_HUMAN,sp|P50552|VASP_HUMAN
biological_process	skeletal system development	2	0.47909	sp|P07355|ANXA2_HUMAN,sp|P80108|PHLD_HUMAN
biological_process	DNA repair	2	0.47909	sp|P46736|BRCC3_HUMAN,sp|P55072|TERA_HUMAN
biological_process	modulation of chemical synaptic transmission	2	0.47909	sp|P00918|CAH2_HUMAN,sp|P62834|RAP1A_HUMAN
biological_process	regulation of trans-synaptic signaling	2	0.47909	sp|P00918|CAH2_HUMAN,sp|P62834|RAP1A_HUMAN
biological_process	regulation of organelle organization	8	0.480253	sp|P07355|ANXA2_HUMAN,sp|Q99436|PSB7_HUMAN,sp|Q99536|VAT1_HUMAN,sp|P50990|TCPQ_HUMAN,sp|P50552|VASP_HUMAN,sp|P60953|CDC42_HUMAN,sp|P02647|APOA1_HUMAN,sp|P02545|LMNA_HUMAN
biological_process	antigen processing and presentation of peptide antigen	5	0.481813	sp|P61769|B2MG_HUMAN,sp|Q99436|PSB7_HUMAN,sp|P28066|PSA5_HUMAN,sp|Q96CW1|AP2M1_HUMAN,sp|O00161|SNP23_HUMAN
biological_process	cell cycle process	6	0.485801	sp|P35579|MYH9_HUMAN,sp|Q15018|ABRX2_HUMAN,sp|Q99436|PSB7_HUMAN,sp|P28066|PSA5_HUMAN,sp|O75531|BAF_HUMAN,sp|P02545|LMNA_HUMAN
biological_process	negative regulation of immune system process	3	0.487842	sp|P02652|APOA2_HUMAN,sp|P01023|A2MG_HUMAN,sp|P02647|APOA1_HUMAN
biological_process	regulation of actin filament-based process	3	0.487842	sp|P35579|MYH9_HUMAN,sp|P50552|VASP_HUMAN,sp|P02647|APOA1_HUMAN
biological_process	antigen processing and presentation of exogenous peptide antigen via MHC class I	3	0.487842	sp|Q99436|PSB7_HUMAN,sp|P28066|PSA5_HUMAN,sp|O00161|SNP23_HUMAN
biological_process	alpha-amino acid metabolic process	3	0.487842	sp|P16930|FAAA_HUMAN,sp|Q9NQR4|NIT2_HUMAN,sp|P06732|KCRM_HUMAN
biological_process	programmed cell death	11	0.4881	sp|P01034|CYTC_HUMAN,sp|P01040|CYTA_HUMAN,sp|P04406|G3P_HUMAN,sp|P19012|K1C15_HUMAN,sp|Q9NSB4|KRT82_HUMAN,sp|P06737|PYGL_HUMAN,sp|O95831|AIFM1_HUMAN,sp|Q92764|KRT35_HUMAN,sp|Q14CN4|K2C72_HUMAN,sp|Q6A163|K1C39_HUMAN,sp|O15296|LX15B_HUMAN
biological_process	cytoskeleton organization	7	0.489003	sp|P35579|MYH9_HUMAN,sp|P04406|G3P_HUMAN,sp|Q14118|DAG1_HUMAN,sp|Q15018|ABRX2_HUMAN,sp|P50552|VASP_HUMAN,sp|P60953|CDC42_HUMAN,sp|P02545|LMNA_HUMAN
biological_process	drug metabolic process	7	0.489003	sp|P04406|G3P_HUMAN,sp|P16930|FAAA_HUMAN,sp|P55072|TERA_HUMAN,sp|P68871|HBB_HUMAN,sp|P69905|HBA_HUMAN,sp|P06732|KCRM_HUMAN,sp|P00492|HPRT_HUMAN
biological_process	response to hypoxia	4	0.492792	sp|P01034|CYTC_HUMAN,sp|Q99436|PSB7_HUMAN,sp|P28066|PSA5_HUMAN,sp|P02545|LMNA_HUMAN
biological_process	response to extracellular stimulus	4	0.492792	sp|P01034|CYTC_HUMAN,sp|P01008|ANT3_HUMAN,sp|O95831|AIFM1_HUMAN,sp|P02647|APOA1_HUMAN
biological_process	response to nutrient levels	4	0.492792	sp|P01034|CYTC_HUMAN,sp|P01008|ANT3_HUMAN,sp|O95831|AIFM1_HUMAN,sp|P02647|APOA1_HUMAN
biological_process	cellular response to hormone stimulus	4	0.492792	sp|P02675|FIBB_HUMAN,sp|P00918|CAH2_HUMAN,sp|P80108|PHLD_HUMAN,sp|O95831|AIFM1_HUMAN
biological_process	regulation of nucleobase-containing compound metabolic process	14	0.493849	sp|Q9UL18|AGO1_HUMAN,sp|P01034|CYTC_HUMAN,sp|Q99436|PSB7_HUMAN,sp|Q2TAY7|SMU1_HUMAN,sp|Q719H9|KCTD1_HUMAN,sp|Q16610|ECM1_HUMAN,sp|P02545|LMNA_HUMAN,sp|P46736|BRCC3_HUMAN,sp|P28066|PSA5_HUMAN,sp|O95831|AIFM1_HUMAN,sp|P55072|TERA_HUMAN,sp|P50990|TCPQ_HUMAN,sp|P10909|CLUS_HUMAN,sp|P60953|CDC42_HUMAN
biological_process	regulation of cell migration	5	0.496246	sp|Q14118|DAG1_HUMAN,sp|P80108|PHLD_HUMAN,sp|Q16610|ECM1_HUMAN,sp|P02545|LMNA_HUMAN,sp|O15296|LX15B_HUMAN
biological_process	cellular response to endogenous stimulus	6	0.498929	sp|P02675|FIBB_HUMAN,sp|P00918|CAH2_HUMAN,sp|P80108|PHLD_HUMAN,sp|O95831|AIFM1_HUMAN,sp|P62834|RAP1A_HUMAN,sp|O43278|SPIT1_HUMAN
biological_process	Ras protein signal transduction	2	0.503097	sp|P62834|RAP1A_HUMAN,sp|P60953|CDC42_HUMAN
biological_process	embryonic morphogenesis	2	0.503097	sp|O43278|SPIT1_HUMAN,sp|P50552|VASP_HUMAN
biological_process	regulation of developmental growth	2	0.503097	sp|Q9UL25|RAB21_HUMAN,sp|O75326|SEM7A_HUMAN
biological_process	response to alcohol	2	0.503097	sp|Q14118|DAG1_HUMAN,sp|P80108|PHLD_HUMAN
biological_process	hexose metabolic process	3	0.50669	sp|P04406|G3P_HUMAN,sp|P43304|GPDM_HUMAN,sp|P40926|MDHM_HUMAN
biological_process	anatomical structure homeostasis	3	0.50669	sp|P61769|B2MG_HUMAN,sp|P01011|AACT_HUMAN,sp|P12273|PIP_HUMAN
biological_process	cell death	11	0.507724	sp|P01034|CYTC_HUMAN,sp|P01040|CYTA_HUMAN,sp|P04406|G3P_HUMAN,sp|P19012|K1C15_HUMAN,sp|Q9NSB4|KRT82_HUMAN,sp|P06737|PYGL_HUMAN,sp|O95831|AIFM1_HUMAN,sp|Q92764|KRT35_HUMAN,sp|Q14CN4|K2C72_HUMAN,sp|Q6A163|K1C39_HUMAN,sp|O15296|LX15B_HUMAN
biological_process	negative regulation of macromolecule biosynthetic process	4	0.508869	sp|Q9UL18|AGO1_HUMAN,sp|P04406|G3P_HUMAN,sp|Q719H9|KCTD1_HUMAN,sp|P62834|RAP1A_HUMAN
biological_process	vesicle organization	4	0.508869	sp|P07355|ANXA2_HUMAN,sp|Q9UEU0|VTI1B_HUMAN,sp|Q96CW1|AP2M1_HUMAN,sp|O00161|SNP23_HUMAN
biological_process	protein modification by small protein conjugation or removal	5	0.510537	sp|Q15018|ABRX2_HUMAN,sp|Q99436|PSB7_HUMAN,sp|P28066|PSA5_HUMAN,sp|P46736|BRCC3_HUMAN,sp|P55072|TERA_HUMAN
biological_process	oxidation-reduction process	6	0.51195	sp|P02652|APOA2_HUMAN,sp|O75874|IDHC_HUMAN,sp|P43304|GPDM_HUMAN,sp|P06737|PYGL_HUMAN,sp|P40926|MDHM_HUMAN,sp|P02647|APOA1_HUMAN
biological_process	regulation of kinase activity	4	0.524725	sp|Q14118|DAG1_HUMAN,sp|P62834|RAP1A_HUMAN,sp|P60953|CDC42_HUMAN,sp|P10909|CLUS_HUMAN
biological_process	cellular response to cytokine stimulus	7	0.525176	sp|P07355|ANXA2_HUMAN,sp|Q9UL18|AGO1_HUMAN,sp|P04406|G3P_HUMAN,sp|Q99436|PSB7_HUMAN,sp|P02675|FIBB_HUMAN,sp|P28066|PSA5_HUMAN,sp|P02679|FIBG_HUMAN
biological_process	carbohydrate catabolic process	3	0.525185	sp|P04406|G3P_HUMAN,sp|P43304|GPDM_HUMAN,sp|P06737|PYGL_HUMAN
biological_process	negative regulation of endopeptidase activity	2	0.526395	sp|P01034|CYTC_HUMAN,sp|P35237|SPB6_HUMAN
biological_process	regulation of intracellular protein transport	2	0.526395	sp|Q99436|PSB7_HUMAN,sp|P60953|CDC42_HUMAN
biological_process	reactive oxygen species metabolic process	2	0.526395	sp|P68871|HBB_HUMAN,sp|P69905|HBA_HUMAN
biological_process	regulation of protein localization to membrane	2	0.526395	sp|Q9UEU0|VTI1B_HUMAN,sp|Q96CW1|AP2M1_HUMAN
biological_process	cellular response to oxygen-containing compound	6	0.537625	sp|Q14118|DAG1_HUMAN,sp|P01034|CYTC_HUMAN,sp|P00918|CAH2_HUMAN,sp|P80108|PHLD_HUMAN,sp|O95831|AIFM1_HUMAN,sp|P62834|RAP1A_HUMAN
biological_process	antigen processing and presentation	5	0.538637	sp|P61769|B2MG_HUMAN,sp|Q99436|PSB7_HUMAN,sp|P28066|PSA5_HUMAN,sp|Q96CW1|AP2M1_HUMAN,sp|O00161|SNP23_HUMAN
biological_process	cation homeostasis	5	0.538637	sp|Q9NTM9|CUTC_HUMAN,sp|P61769|B2MG_HUMAN,sp|P00918|CAH2_HUMAN,sp|P00450|CERU_HUMAN,sp|P08582|TRFM_HUMAN
biological_process	metal ion homeostasis	4	0.540343	sp|Q9NTM9|CUTC_HUMAN,sp|P61769|B2MG_HUMAN,sp|P00450|CERU_HUMAN,sp|P08582|TRFM_HUMAN
biological_process	head development	4	0.540343	sp|P01034|CYTC_HUMAN,sp|O75326|SEM7A_HUMAN,sp|O75787|RENR_HUMAN,sp|P00492|HPRT_HUMAN
biological_process	supramolecular fiber organization	4	0.540343	sp|P07355|ANXA2_HUMAN,sp|P01034|CYTC_HUMAN,sp|P50552|VASP_HUMAN,sp|P60953|CDC42_HUMAN
biological_process	organic substance biosynthetic process	20	0.540616	sp|P49590|SYHM_HUMAN,sp|P43304|GPDM_HUMAN,sp|P80108|PHLD_HUMAN,sp|A1L3X0|ELOV7_HUMAN,sp|P02647|APOA1_HUMAN,sp|P35052|GPC1_HUMAN,sp|P55072|TERA_HUMAN,sp|P08582|TRFM_HUMAN,sp|O15296|LX15B_HUMAN,sp|Q96DR8|MUCL1_HUMAN,sp|Q9UL18|AGO1_HUMAN,sp|Q14118|DAG1_HUMAN,sp|P02652|APOA2_HUMAN,sp|Q719H9|KCTD1_HUMAN,sp|P0C869|PA24B_HUMAN,sp|P40926|MDHM_HUMAN,sp|P00492|HPRT_HUMAN,sp|P06732|KCRM_HUMAN,sp|P06737|PYGL…
biological_process	alcohol metabolic process	3	0.543305	sp|P02652|APOA2_HUMAN,sp|P43304|GPDM_HUMAN,sp|P02647|APOA1_HUMAN
biological_process	establishment of protein localization to organelle	3	0.543305	sp|Q9UEU0|VTI1B_HUMAN,sp|Q14118|DAG1_HUMAN,sp|P02545|LMNA_HUMAN
biological_process	cellular macromolecule metabolic process	30	0.547256	sp|P49590|SYHM_HUMAN,sp|Q15018|ABRX2_HUMAN,sp|Q99436|PSB7_HUMAN,sp|O75531|BAF_HUMAN,sp|P02679|FIBG_HUMAN,sp|P80108|PHLD_HUMAN,sp|P00450|CERU_HUMAN,sp|P01040|CYTA_HUMAN,sp|P02647|APOA1_HUMAN,sp|Q15631|TSN_HUMAN,sp|P28066|PSA5_HUMAN,sp|P46736|BRCC3_HUMAN,sp|P35052|GPC1_HUMAN,sp|P16870|CBPE_HUMAN,sp|P55072|TERA_HUMAN,sp|P08582|TRFM_HUMAN,sp|Q96DR8|MUCL1_HUMAN,sp|Q9UL18|AGO1_HUMAN,sp|Q14118|DAG1_HUMA…
biological_process	phagocytosis	2	0.548959	sp|P35579|MYH9_HUMAN,sp|P60953|CDC42_HUMAN
biological_process	negative regulation of G2/M transition of mitotic cell cycle	2	0.548959	sp|Q99436|PSB7_HUMAN,sp|P28066|PSA5_HUMAN
biological_process	carbohydrate biosynthetic process	2	0.548959	sp|P43304|GPDM_HUMAN,sp|P40926|MDHM_HUMAN
biological_process	multi-multicellular organism process	2	0.548959	sp|P01034|CYTC_HUMAN,sp|P0C869|PA24B_HUMAN
biological_process	regulation of epithelial cell proliferation	2	0.548959	sp|Q16610|ECM1_HUMAN,sp|P60953|CDC42_HUMAN
biological_process	negative regulation of ubiquitin-protein ligase activity involved in mitotic cell cycle	2	0.548959	sp|Q99436|PSB7_HUMAN,sp|P28066|PSA5_HUMAN
biological_process	positive regulation of ubiquitin-protein ligase activity involved in regulation of mitotic cell cycle transition	2	0.548959	sp|Q99436|PSB7_HUMAN,sp|P28066|PSA5_HUMAN
biological_process	regulation of ubiquitin-protein ligase activity involved in mitotic cell cycle	2	0.548959	sp|Q99436|PSB7_HUMAN,sp|P28066|PSA5_HUMAN
biological_process	regulation of transcription from RNA polymerase II promoter in response to hypoxia	2	0.548959	sp|Q99436|PSB7_HUMAN,sp|P28066|PSA5_HUMAN
biological_process	cellular response to external stimulus	2	0.548959	sp|Q14118|DAG1_HUMAN,sp|O95831|AIFM1_HUMAN
biological_process	negative regulation of canonical Wnt signaling pathway	2	0.548959	sp|Q99436|PSB7_HUMAN,sp|P28066|PSA5_HUMAN
biological_process	regulation of protein localization to nucleus	2	0.548959	sp|P50990|TCPQ_HUMAN,sp|P02545|LMNA_HUMAN
biological_process	negative regulation of cell cycle G2/M phase transition	2	0.548959	sp|Q99436|PSB7_HUMAN,sp|P28066|PSA5_HUMAN
biological_process	cellular protein metabolic process	23	0.549605	sp|P49590|SYHM_HUMAN,sp|Q15018|ABRX2_HUMAN,sp|Q99436|PSB7_HUMAN,sp|P02679|FIBG_HUMAN,sp|P80108|PHLD_HUMAN,sp|P00450|CERU_HUMAN,sp|P01040|CYTA_HUMAN,sp|P02647|APOA1_HUMAN,sp|P46736|BRCC3_HUMAN,sp|P28066|PSA5_HUMAN,sp|P16870|CBPE_HUMAN,sp|P55072|TERA_HUMAN,sp|P08582|TRFM_HUMAN,sp|Q96DR8|MUCL1_HUMAN,sp|Q14118|DAG1_HUMAN,sp|P02652|APOA2_HUMAN,sp|P01034|CYTC_HUMAN,sp|P01008|ANT3_HUMAN,sp|Q96CW1|AP2M1_…
biological_process	inorganic ion homeostasis	5	0.55242	sp|Q9NTM9|CUTC_HUMAN,sp|P61769|B2MG_HUMAN,sp|P00918|CAH2_HUMAN,sp|P00450|CERU_HUMAN,sp|P08582|TRFM_HUMAN
biological_process	endomembrane system organization	4	0.555707	sp|O75531|BAF_HUMAN,sp|P60953|CDC42_HUMAN,sp|P10909|CLUS_HUMAN,sp|P02545|LMNA_HUMAN
biological_process	aromatic compound catabolic process	4	0.555707	sp|Q9UL18|AGO1_HUMAN,sp|P16930|FAAA_HUMAN,sp|P55072|TERA_HUMAN,sp|P00492|HPRT_HUMAN
biological_process	response to oxygen-containing compound	10	0.556588	sp|Q14118|DAG1_HUMAN,sp|P02652|APOA2_HUMAN,sp|P01034|CYTC_HUMAN,sp|P00918|CAH2_HUMAN,sp|P80108|PHLD_HUMAN,sp|P00738|HPT_HUMAN,sp|P62834|RAP1A_HUMAN,sp|O95831|AIFM1_HUMAN,sp|P68871|HBB_HUMAN,sp|P69905|HBA_HUMAN
biological_process	purine nucleoside monophosphate metabolic process	3	0.561031	sp|P04406|G3P_HUMAN,sp|P55072|TERA_HUMAN,sp|P00492|HPRT_HUMAN
biological_process	ribonucleoside monophosphate metabolic process	3	0.561031	sp|P04406|G3P_HUMAN,sp|P55072|TERA_HUMAN,sp|P00492|HPRT_HUMAN
biological_process	purine ribonucleoside monophosphate metabolic process	3	0.561031	sp|P04406|G3P_HUMAN,sp|P55072|TERA_HUMAN,sp|P00492|HPRT_HUMAN
biological_process	carbohydrate metabolic process	6	0.562746	sp|P04406|G3P_HUMAN,sp|O75874|IDHC_HUMAN,sp|P43304|GPDM_HUMAN,sp|P06737|PYGL_HUMAN,sp|P07195|LDHB_HUMAN,sp|P40926|MDHM_HUMAN
biological_process	regulation of transferase activity	6	0.562746	sp|Q14118|DAG1_HUMAN,sp|Q99436|PSB7_HUMAN,sp|P28066|PSA5_HUMAN,sp|P62834|RAP1A_HUMAN,sp|P60953|CDC42_HUMAN,sp|P10909|CLUS_HUMAN
biological_process	regulation of cell motility	5	0.566011	sp|Q14118|DAG1_HUMAN,sp|P80108|PHLD_HUMAN,sp|Q16610|ECM1_HUMAN,sp|P02545|LMNA_HUMAN,sp|O15296|LX15B_HUMAN
biological_process	adaptive immune response	2	0.570772	sp|P02675|FIBB_HUMAN,sp|P02671|FIBA_HUMAN
biological_process	regulation of cellular amino acid metabolic process	2	0.570772	sp|Q99436|PSB7_HUMAN,sp|P28066|PSA5_HUMAN
biological_process	lipid transport	2	0.570772	sp|P02652|APOA2_HUMAN,sp|P02647|APOA1_HUMAN
biological_process	negative regulation of Wnt signaling pathway	2	0.570772	sp|Q99436|PSB7_HUMAN,sp|P28066|PSA5_HUMAN
biological_process	anaphase-promoting complex-dependent catabolic process	2	0.570772	sp|Q99436|PSB7_HUMAN,sp|P28066|PSA5_HUMAN
biological_process	SCF-dependent proteasomal ubiquitin-dependent protein catabolic process	2	0.570772	sp|Q99436|PSB7_HUMAN,sp|P28066|PSA5_HUMAN
biological_process	negative regulation of defense response	2	0.570772	sp|P01023|A2MG_HUMAN,sp|P02647|APOA1_HUMAN
biological_process	cell junction assembly	2	0.570772	sp|P50552|VASP_HUMAN,sp|P60953|CDC42_HUMAN
biological_process	regulation of lipid biosynthetic process	2	0.570772	sp|O75874|IDHC_HUMAN,sp|P80108|PHLD_HUMAN
biological_process	positive regulation of ubiquitin-protein transferase activity	2	0.570772	sp|Q99436|PSB7_HUMAN,sp|P28066|PSA5_HUMAN
biological_process	negative regulation of ubiquitin-protein transferase activity	2	0.570772	sp|Q99436|PSB7_HUMAN,sp|P28066|PSA5_HUMAN
biological_process	membrane fusion	2	0.570772	sp|Q9UEU0|VTI1B_HUMAN,sp|O00161|SNP23_HUMAN
biological_process	regulation of actin filament organization	2	0.570772	sp|P50552|VASP_HUMAN,sp|P02647|APOA1_HUMAN
biological_process	regulation of hematopoietic progenitor cell differentiation	2	0.570772	sp|Q99436|PSB7_HUMAN,sp|P28066|PSA5_HUMAN
biological_process	regulation of hematopoietic stem cell differentiation	2	0.570772	sp|Q99436|PSB7_HUMAN,sp|P28066|PSA5_HUMAN
biological_process	negative regulation of ubiquitin protein ligase activity	2	0.570772	sp|Q99436|PSB7_HUMAN,sp|P28066|PSA5_HUMAN
biological_process	positive regulation of ubiquitin protein ligase activity	2	0.570772	sp|Q99436|PSB7_HUMAN,sp|P28066|PSA5_HUMAN
biological_process	establishment of organelle localization	4	0.570804	sp|P35579|MYH9_HUMAN,sp|Q96CW1|AP2M1_HUMAN,sp|O00161|SNP23_HUMAN,sp|P60953|CDC42_HUMAN
biological_process	organic cyclic compound catabolic process	4	0.570804	sp|Q9UL18|AGO1_HUMAN,sp|P16930|FAAA_HUMAN,sp|P55072|TERA_HUMAN,sp|P00492|HPRT_HUMAN
biological_process	keratinocyte differentiation	7	0.571933	sp|Q9NSB4|KRT82_HUMAN,sp|P19012|K1C15_HUMAN,sp|P01040|CYTA_HUMAN,sp|Q92764|KRT35_HUMAN,sp|Q14CN4|K2C72_HUMAN,sp|Q6A163|K1C39_HUMAN,sp|P60953|CDC42_HUMAN
biological_process	organonitrogen compound metabolic process	40	0.574711	sp|P49590|SYHM_HUMAN,sp|Q15018|ABRX2_HUMAN,sp|Q99436|PSB7_HUMAN,sp|P80108|PHLD_HUMAN,sp|P01040|CYTA_HUMAN,sp|P12273|PIP_HUMAN,sp|P07355|ANXA2_HUMAN,sp|O75874|IDHC_HUMAN,sp|P35052|GPC1_HUMAN,sp|P07195|LDHB_HUMAN,sp|P08582|TRFM_HUMAN,sp|P35579|MYH9_HUMAN,sp|P02652|APOA2_HUMAN,sp|P01034|CYTC_HUMAN,sp|P0C869|PA24B_HUMAN,sp|O75787|RENR_HUMAN,sp|P40926|MDHM_HUMAN,sp|P02671|FIBA_HUMAN,sp|P04406|G3P_HUMA…
biological_process	negative regulation of gene expression	6	0.575075	sp|Q15631|TSN_HUMAN,sp|Q9UL18|AGO1_HUMAN,sp|P04406|G3P_HUMAN,sp|Q719H9|KCTD1_HUMAN,sp|P01023|A2MG_HUMAN,sp|P60953|CDC42_HUMAN
biological_process	interspecies interaction between organisms	9	0.578008	sp|Q14118|DAG1_HUMAN,sp|P02652|APOA2_HUMAN,sp|Q99436|PSB7_HUMAN,sp|O75531|BAF_HUMAN,sp|Q96CW1|AP2M1_HUMAN,sp|P04406|G3P_HUMAN,sp|P07355|ANXA2_HUMAN,sp|P81605|DCD_HUMAN,sp|P55072|TERA_HUMAN
biological_process	nucleoside monophosphate metabolic process	3	0.578346	sp|P04406|G3P_HUMAN,sp|P55072|TERA_HUMAN,sp|P00492|HPRT_HUMAN
biological_process	regulation of protein ubiquitination	3	0.578346	sp|Q99436|PSB7_HUMAN,sp|P28066|PSA5_HUMAN,sp|P10909|CLUS_HUMAN
biological_process	regulation of inflammatory response	3	0.578346	sp|O75326|SEM7A_HUMAN,sp|P01023|A2MG_HUMAN,sp|P02647|APOA1_HUMAN
biological_process	posttranscriptional regulation of gene expression	5	0.579399	sp|Q15631|TSN_HUMAN,sp|Q9UL18|AGO1_HUMAN,sp|P04406|G3P_HUMAN,sp|Q99436|PSB7_HUMAN,sp|P28066|PSA5_HUMAN
biological_process	cellular component organization	34	0.582611	sp|Q15018|ABRX2_HUMAN,sp|P07355|ANXA2_HUMAN,sp|P35052|GPC1_HUMAN,sp|P35579|MYH9_HUMAN,sp|P02652|APOA2_HUMAN,sp|P01034|CYTC_HUMAN,sp|O75326|SEM7A_HUMAN,sp|P02671|FIBA_HUMAN,sp|P02545|LMNA_HUMAN,sp|P04406|G3P_HUMAN,sp|Q9NTM9|CUTC_HUMAN,sp|P68871|HBB_HUMAN,sp|P69905|HBA_HUMAN,sp|P10909|CLUS_HUMAN,sp|Q9UEU0|VTI1B_HUMAN,sp|O75531|BAF_HUMAN,sp|P02679|FIBG_HUMAN,sp|O00161|SNP23_HUMAN,sp|P02647|APOA1_HUM…
biological_process	nucleobase-containing small molecule metabolic process	7	0.583307	sp|P04406|G3P_HUMAN,sp|O75874|IDHC_HUMAN,sp|P43304|GPDM_HUMAN,sp|P07195|LDHB_HUMAN,sp|P55072|TERA_HUMAN,sp|P40926|MDHM_HUMAN,sp|P00492|HPRT_HUMAN
biological_process	lipid catabolic process	4	0.585621	sp|Q3MJ16|PA24E_HUMAN,sp|P02652|APOA2_HUMAN,sp|P0C869|PA24B_HUMAN,sp|Q8IV08|PLD3_HUMAN
biological_process	positive regulation of gene expression	6	0.587239	sp|P35579|MYH9_HUMAN,sp|Q9UL18|AGO1_HUMAN,sp|P08582|TRFM_HUMAN,sp|P12273|PIP_HUMAN,sp|P60953|CDC42_HUMAN,sp|P02545|LMNA_HUMAN
biological_process	regulation of cell proliferation	8	0.590939	sp|P01034|CYTC_HUMAN,sp|P80108|PHLD_HUMAN,sp|Q16610|ECM1_HUMAN,sp|O43278|SPIT1_HUMAN,sp|P02545|LMNA_HUMAN,sp|P07355|ANXA2_HUMAN,sp|O15296|LX15B_HUMAN,sp|P60953|CDC42_HUMAN
biological_process	NIK/NF-kappaB signaling	2	0.591826	sp|Q99436|PSB7_HUMAN,sp|P28066|PSA5_HUMAN
biological_process	regulation of transcription from RNA polymerase II promoter in response to stress	2	0.591826	sp|Q99436|PSB7_HUMAN,sp|P28066|PSA5_HUMAN
biological_process	regulation of DNA-templated transcription in response to stress	2	0.591826	sp|Q99436|PSB7_HUMAN,sp|P28066|PSA5_HUMAN
biological_process	regulation of ubiquitin-protein transferase activity	2	0.591826	sp|Q99436|PSB7_HUMAN,sp|P28066|PSA5_HUMAN
biological_process	regulation of vasculature development	2	0.591826	sp|Q16610|ECM1_HUMAN,sp|P62834|RAP1A_HUMAN
biological_process	regulation of ubiquitin protein ligase activity	2	0.591826	sp|Q99436|PSB7_HUMAN,sp|P28066|PSA5_HUMAN
biological_process	regulation of stem cell differentiation	2	0.591826	sp|Q99436|PSB7_HUMAN,sp|P28066|PSA5_HUMAN
biological_process	biosynthetic process	20	0.592703	sp|P49590|SYHM_HUMAN,sp|P43304|GPDM_HUMAN,sp|P80108|PHLD_HUMAN,sp|A1L3X0|ELOV7_HUMAN,sp|P02647|APOA1_HUMAN,sp|P35052|GPC1_HUMAN,sp|P55072|TERA_HUMAN,sp|P08582|TRFM_HUMAN,sp|O15296|LX15B_HUMAN,sp|Q96DR8|MUCL1_HUMAN,sp|Q9UL18|AGO1_HUMAN,sp|Q14118|DAG1_HUMAN,sp|P02652|APOA2_HUMAN,sp|Q719H9|KCTD1_HUMAN,sp|P0C869|PA24B_HUMAN,sp|P40926|MDHM_HUMAN,sp|P00492|HPRT_HUMAN,sp|P06732|KCRM_HUMAN,sp|P06737|PYGL…
biological_process	epidermal cell differentiation	7	0.59454	sp|Q9NSB4|KRT82_HUMAN,sp|P19012|K1C15_HUMAN,sp|P01040|CYTA_HUMAN,sp|Q92764|KRT35_HUMAN,sp|Q14CN4|K2C72_HUMAN,sp|Q6A163|K1C39_HUMAN,sp|P60953|CDC42_HUMAN
biological_process	primary metabolic process	49	0.597104	sp|P49590|SYHM_HUMAN,sp|Q15018|ABRX2_HUMAN,sp|Q99436|PSB7_HUMAN,sp|P80108|PHLD_HUMAN,sp|P01040|CYTA_HUMAN,sp|P12273|PIP_HUMAN,sp|P07355|ANXA2_HUMAN,sp|O75874|IDHC_HUMAN,sp|P35052|GPC1_HUMAN,sp|P07195|LDHB_HUMAN,sp|Q8IV08|PLD3_HUMAN,sp|P08582|TRFM_HUMAN,sp|O15296|LX15B_HUMAN,sp|P35579|MYH9_HUMAN,sp|P02652|APOA2_HUMAN,sp|P01034|CYTC_HUMAN,sp|P0C869|PA24B_HUMAN,sp|O75787|RENR_HUMAN,sp|P40926|MDHM_HU…
biological_process	regulation of transcription from RNA polymerase II promoter	6	0.59923	sp|Q9UL18|AGO1_HUMAN,sp|Q99436|PSB7_HUMAN,sp|P28066|PSA5_HUMAN,sp|Q719H9|KCTD1_HUMAN,sp|Q16610|ECM1_HUMAN,sp|P02545|LMNA_HUMAN
biological_process	behavior	3	0.611697	sp|Q9HB07|MYG1_HUMAN,sp|P01034|CYTC_HUMAN,sp|P00492|HPRT_HUMAN
biological_process	tumor necrosis factor-mediated signaling pathway	2	0.612115	sp|Q99436|PSB7_HUMAN,sp|P28066|PSA5_HUMAN
biological_process	Fc-epsilon receptor signaling pathway	2	0.612115	sp|Q99436|PSB7_HUMAN,sp|P28066|PSA5_HUMAN
biological_process	organic cyclic compound metabolic process	19	0.615164	sp|P49590|SYHM_HUMAN,sp|O75531|BAF_HUMAN,sp|P43304|GPDM_HUMAN,sp|P16930|FAAA_HUMAN,sp|P02774|VTDB_HUMAN,sp|P02647|APOA1_HUMAN,sp|Q15631|TSN_HUMAN,sp|O75874|IDHC_HUMAN,sp|P46736|BRCC3_HUMAN,sp|P07195|LDHB_HUMAN,sp|P55072|TERA_HUMAN,sp|Q9UL18|AGO1_HUMAN,sp|P02652|APOA2_HUMAN,sp|Q2TAY7|SMU1_HUMAN,sp|Q719H9|KCTD1_HUMAN,sp|P40926|MDHM_HUMAN,sp|P00492|HPRT_HUMAN,sp|P04406|G3P_HUMAN,sp|P12081|SYHC_HUMAN
biological_process	response to organonitrogen compound	7	0.616561	sp|Q14118|DAG1_HUMAN,sp|P00918|CAH2_HUMAN,sp|P80108|PHLD_HUMAN,sp|O95831|AIFM1_HUMAN,sp|P62834|RAP1A_HUMAN,sp|P55072|TERA_HUMAN,sp|P00492|HPRT_HUMAN
biological_process	response to cytokine	7	0.616561	sp|P07355|ANXA2_HUMAN,sp|Q9UL18|AGO1_HUMAN,sp|P04406|G3P_HUMAN,sp|Q99436|PSB7_HUMAN,sp|P02675|FIBB_HUMAN,sp|P28066|PSA5_HUMAN,sp|P02679|FIBG_HUMAN
biological_process	homeostatic process	11	0.620422	sp|P61769|B2MG_HUMAN,sp|P02652|APOA2_HUMAN,sp|P01011|AACT_HUMAN,sp|P00918|CAH2_HUMAN,sp|P00450|CERU_HUMAN,sp|P12273|PIP_HUMAN,sp|P02647|APOA1_HUMAN,sp|Q9NTM9|CUTC_HUMAN,sp|P06737|PYGL_HUMAN,sp|P62834|RAP1A_HUMAN,sp|P08582|TRFM_HUMAN
biological_process	nitrogen compound metabolic process	45	0.622994	sp|P49590|SYHM_HUMAN,sp|Q15018|ABRX2_HUMAN,sp|Q99436|PSB7_HUMAN,sp|P80108|PHLD_HUMAN,sp|P01040|CYTA_HUMAN,sp|P12273|PIP_HUMAN,sp|P07355|ANXA2_HUMAN,sp|O75874|IDHC_HUMAN,sp|P35052|GPC1_HUMAN,sp|P07195|LDHB_HUMAN,sp|P08582|TRFM_HUMAN,sp|P35579|MYH9_HUMAN,sp|P02652|APOA2_HUMAN,sp|P01034|CYTC_HUMAN,sp|P0C869|PA24B_HUMAN,sp|O75787|RENR_HUMAN,sp|P40926|MDHM_HUMAN,sp|P02671|FIBA_HUMAN,sp|P04406|G3P_HUMA…
biological_process	regulation of macromolecule biosynthetic process	13	0.623869	sp|Q9UL18|AGO1_HUMAN,sp|P02652|APOA2_HUMAN,sp|P01034|CYTC_HUMAN,sp|Q99436|PSB7_HUMAN,sp|Q719H9|KCTD1_HUMAN,sp|Q16610|ECM1_HUMAN,sp|P02545|LMNA_HUMAN,sp|P04406|G3P_HUMAN,sp|P28066|PSA5_HUMAN,sp|P62834|RAP1A_HUMAN,sp|P50990|TCPQ_HUMAN,sp|P10909|CLUS_HUMAN,sp|P60953|CDC42_HUMAN
biological_process	response to peptide hormone	3	0.627713	sp|Q14118|DAG1_HUMAN,sp|P00918|CAH2_HUMAN,sp|P80108|PHLD_HUMAN
biological_process	regulation of multi-organism process	3	0.627713	sp|P07355|ANXA2_HUMAN,sp|P04406|G3P_HUMAN,sp|O75531|BAF_HUMAN
biological_process	response to peptide	3	0.627713	sp|Q14118|DAG1_HUMAN,sp|P00918|CAH2_HUMAN,sp|P80108|PHLD_HUMAN
biological_process	regulation of locomotion	5	0.630743	sp|Q14118|DAG1_HUMAN,sp|P80108|PHLD_HUMAN,sp|Q16610|ECM1_HUMAN,sp|P02545|LMNA_HUMAN,sp|O15296|LX15B_HUMAN
biological_process	nucleocytoplasmic transport	2	0.631638	sp|Q14118|DAG1_HUMAN,sp|P02545|LMNA_HUMAN
biological_process	regulation of actin cytoskeleton organization	2	0.631638	sp|P50552|VASP_HUMAN,sp|P02647|APOA1_HUMAN
biological_process	cell junction organization	2	0.631638	sp|P50552|VASP_HUMAN,sp|P60953|CDC42_HUMAN
biological_process	T cell receptor signaling pathway	2	0.631638	sp|Q99436|PSB7_HUMAN,sp|P28066|PSA5_HUMAN
biological_process	maintenance of location	2	0.631638	sp|Q14118|DAG1_HUMAN,sp|P02647|APOA1_HUMAN
biological_process	muscle structure development	2	0.631638	sp|P35579|MYH9_HUMAN,sp|P02545|LMNA_HUMAN
biological_process	cellular response to growth factor stimulus	2	0.631638	sp|P62834|RAP1A_HUMAN,sp|O43278|SPIT1_HUMAN
biological_process	positive regulation of canonical Wnt signaling pathway	2	0.631638	sp|Q99436|PSB7_HUMAN,sp|P28066|PSA5_HUMAN
biological_process	negative regulation of cell cycle phase transition	2	0.631638	sp|Q99436|PSB7_HUMAN,sp|P28066|PSA5_HUMAN
biological_process	negative regulation of mitotic cell cycle phase transition	2	0.631638	sp|Q99436|PSB7_HUMAN,sp|P28066|PSA5_HUMAN
biological_process	cellular component organization or biogenesis	34	0.632742	sp|Q15018|ABRX2_HUMAN,sp|P07355|ANXA2_HUMAN,sp|P35052|GPC1_HUMAN,sp|P35579|MYH9_HUMAN,sp|P02652|APOA2_HUMAN,sp|P01034|CYTC_HUMAN,sp|O75326|SEM7A_HUMAN,sp|P02671|FIBA_HUMAN,sp|P02545|LMNA_HUMAN,sp|P04406|G3P_HUMAN,sp|Q9NTM9|CUTC_HUMAN,sp|P68871|HBB_HUMAN,sp|P69905|HBA_HUMAN,sp|P10909|CLUS_HUMAN,sp|Q9UEU0|VTI1B_HUMAN,sp|O75531|BAF_HUMAN,sp|P02679|FIBG_HUMAN,sp|O00161|SNP23_HUMAN,sp|P02647|APOA1_HUM…
biological_process	nucleic acid metabolic process	9	0.636974	sp|P49590|SYHM_HUMAN,sp|Q9UL18|AGO1_HUMAN,sp|O75531|BAF_HUMAN,sp|Q2TAY7|SMU1_HUMAN,sp|Q719H9|KCTD1_HUMAN,sp|Q15631|TSN_HUMAN,sp|P46736|BRCC3_HUMAN,sp|P55072|TERA_HUMAN,sp|P12081|SYHC_HUMAN
biological_process	intracellular signal transduction	8	0.642084	sp|Q9UL18|AGO1_HUMAN,sp|Q99436|PSB7_HUMAN,sp|P0C869|PA24B_HUMAN,sp|Q9H190|SDCB2_HUMAN,sp|P28066|PSA5_HUMAN,sp|P62834|RAP1A_HUMAN,sp|O95831|AIFM1_HUMAN,sp|P60953|CDC42_HUMAN
biological_process	symbiosis, encompassing mutualism through parasitism	8	0.642084	sp|P07355|ANXA2_HUMAN,sp|P04406|G3P_HUMAN,sp|Q14118|DAG1_HUMAN,sp|P02652|APOA2_HUMAN,sp|Q99436|PSB7_HUMAN,sp|O75531|BAF_HUMAN,sp|Q96CW1|AP2M1_HUMAN,sp|P55072|TERA_HUMAN
biological_process	organelle localization	5	0.642991	sp|P35579|MYH9_HUMAN,sp|Q9UEU0|VTI1B_HUMAN,sp|Q96CW1|AP2M1_HUMAN,sp|O00161|SNP23_HUMAN,sp|P60953|CDC42_HUMAN
biological_process	regulation of cellular amide metabolic process	3	0.643279	sp|Q9UL18|AGO1_HUMAN,sp|P04406|G3P_HUMAN,sp|P10909|CLUS_HUMAN
biological_process	nucleobase-containing compound catabolic process	3	0.643279	sp|Q9UL18|AGO1_HUMAN,sp|P55072|TERA_HUMAN,sp|P00492|HPRT_HUMAN
biological_process	multicellular organismal homeostasis	3	0.643279	sp|P61769|B2MG_HUMAN,sp|P01011|AACT_HUMAN,sp|P12273|PIP_HUMAN
biological_process	negative regulation of transport	3	0.643279	sp|P02652|APOA2_HUMAN,sp|P62834|RAP1A_HUMAN,sp|P02647|APOA1_HUMAN
biological_process	regulation of mRNA metabolic process	3	0.643279	sp|Q99436|PSB7_HUMAN,sp|P28066|PSA5_HUMAN,sp|Q2TAY7|SMU1_HUMAN
biological_process	negative regulation of cellular macromolecule biosynthetic process	3	0.643279	sp|Q9UL18|AGO1_HUMAN,sp|P04406|G3P_HUMAN,sp|Q719H9|KCTD1_HUMAN
biological_process	negative regulation of cell death	7	0.648399	sp|P01034|CYTC_HUMAN,sp|P02675|FIBB_HUMAN,sp|P02679|FIBG_HUMAN,sp|P12273|PIP_HUMAN,sp|P10909|CLUS_HUMAN,sp|P02545|LMNA_HUMAN,sp|P02671|FIBA_HUMAN
biological_process	actin filament organization	2	0.6504	sp|P50552|VASP_HUMAN,sp|P60953|CDC42_HUMAN
biological_process	negative regulation of organelle organization	2	0.6504	sp|Q99536|VAT1_HUMAN,sp|P02545|LMNA_HUMAN
biological_process	lipid localization	2	0.6504	sp|P02652|APOA2_HUMAN,sp|P02647|APOA1_HUMAN
biological_process	regulation of transmembrane transport	2	0.6504	sp|P61769|B2MG_HUMAN,sp|P00918|CAH2_HUMAN
biological_process	negative regulation of mitotic cell cycle	2	0.6504	sp|Q99436|PSB7_HUMAN,sp|P28066|PSA5_HUMAN
biological_process	antigen receptor-mediated signaling pathway	2	0.6504	sp|Q99436|PSB7_HUMAN,sp|P28066|PSA5_HUMAN
biological_process	regulation of canonical Wnt signaling pathway	2	0.6504	sp|Q99436|PSB7_HUMAN,sp|P28066|PSA5_HUMAN
biological_process	response to growth factor	2	0.6504	sp|P62834|RAP1A_HUMAN,sp|O43278|SPIT1_HUMAN
biological_process	small molecule biosynthetic process	5	0.654992	sp|P43304|GPDM_HUMAN,sp|A1L3X0|ELOV7_HUMAN,sp|P40926|MDHM_HUMAN,sp|P02647|APOA1_HUMAN,sp|O15296|LX15B_HUMAN
biological_process	epithelial cell differentiation	9	0.655661	sp|P01034|CYTC_HUMAN,sp|P01040|CYTA_HUMAN,sp|P19012|K1C15_HUMAN,sp|Q9NSB4|KRT82_HUMAN,sp|P62834|RAP1A_HUMAN,sp|Q92764|KRT35_HUMAN,sp|Q14CN4|K2C72_HUMAN,sp|P60953|CDC42_HUMAN,sp|Q6A163|K1C39_HUMAN
biological_process	monosaccharide metabolic process	3	0.658392	sp|P04406|G3P_HUMAN,sp|P43304|GPDM_HUMAN,sp|P40926|MDHM_HUMAN
biological_process	proteasome-mediated ubiquitin-dependent protein catabolic process	3	0.658392	sp|Q99436|PSB7_HUMAN,sp|P28066|PSA5_HUMAN,sp|P55072|TERA_HUMAN
biological_process	negative regulation of biosynthetic process	4	0.668149	sp|Q9UL18|AGO1_HUMAN,sp|P04406|G3P_HUMAN,sp|Q719H9|KCTD1_HUMAN,sp|P62834|RAP1A_HUMAN
biological_process	endosomal transport	2	0.668407	sp|Q9UEU0|VTI1B_HUMAN,sp|P55072|TERA_HUMAN
biological_process	negative regulation of protein ubiquitination	2	0.668407	sp|Q99436|PSB7_HUMAN,sp|P28066|PSA5_HUMAN
biological_process	cellular response to peptide hormone stimulus	2	0.668407	sp|P00918|CAH2_HUMAN,sp|P80108|PHLD_HUMAN
biological_process	cellular response to peptide	2	0.668407	sp|P00918|CAH2_HUMAN,sp|P80108|PHLD_HUMAN
biological_process	negative regulation of protein modification by small protein conjugation or removal	2	0.668407	sp|Q99436|PSB7_HUMAN,sp|P28066|PSA5_HUMAN
biological_process	cellular lipid metabolic process	8	0.671059	sp|Q3MJ16|PA24E_HUMAN,sp|P02652|APOA2_HUMAN,sp|P80108|PHLD_HUMAN,sp|P35052|GPC1_HUMAN,sp|P0C869|PA24B_HUMAN,sp|A1L3X0|ELOV7_HUMAN,sp|P02647|APOA1_HUMAN,sp|O15296|LX15B_HUMAN
biological_process	RNA processing	3	0.673049	sp|Q15631|TSN_HUMAN,sp|Q9UL18|AGO1_HUMAN,sp|Q2TAY7|SMU1_HUMAN
biological_process	fatty acid metabolic process	3	0.673049	sp|P0C869|PA24B_HUMAN,sp|A1L3X0|ELOV7_HUMAN,sp|O15296|LX15B_HUMAN
biological_process	cellular lipid catabolic process	3	0.673049	sp|Q3MJ16|PA24E_HUMAN,sp|P02652|APOA2_HUMAN,sp|P0C869|PA24B_HUMAN
biological_process	cellular response to organonitrogen compound	3	0.673049	sp|P00918|CAH2_HUMAN,sp|P80108|PHLD_HUMAN,sp|P62834|RAP1A_HUMAN
biological_process	positive regulation of cellular protein localization	3	0.673049	sp|Q99436|PSB7_HUMAN,sp|P50990|TCPQ_HUMAN,sp|P60953|CDC42_HUMAN
biological_process	nucleobase-containing compound metabolic process	15	0.67335	sp|P49590|SYHM_HUMAN,sp|Q9UL18|AGO1_HUMAN,sp|O75531|BAF_HUMAN,sp|Q2TAY7|SMU1_HUMAN,sp|Q719H9|KCTD1_HUMAN,sp|P43304|GPDM_HUMAN,sp|P40926|MDHM_HUMAN,sp|P00492|HPRT_HUMAN,sp|Q15631|TSN_HUMAN,sp|P04406|G3P_HUMAN,sp|O75874|IDHC_HUMAN,sp|P46736|BRCC3_HUMAN,sp|P07195|LDHB_HUMAN,sp|P55072|TERA_HUMAN,sp|P12081|SYHC_HUMAN
biological_process	lipid metabolic process	10	0.676907	sp|Q3MJ16|PA24E_HUMAN,sp|P02652|APOA2_HUMAN,sp|P80108|PHLD_HUMAN,sp|P0C869|PA24B_HUMAN,sp|A1L3X0|ELOV7_HUMAN,sp|P02774|VTDB_HUMAN,sp|P02647|APOA1_HUMAN,sp|P35052|GPC1_HUMAN,sp|Q8IV08|PLD3_HUMAN,sp|O15296|LX15B_HUMAN
biological_process	regulation of cellular component movement	5	0.678235	sp|Q14118|DAG1_HUMAN,sp|P80108|PHLD_HUMAN,sp|Q16610|ECM1_HUMAN,sp|P02545|LMNA_HUMAN,sp|O15296|LX15B_HUMAN
biological_process	negative regulation of cell cycle process	2	0.68567	sp|Q99436|PSB7_HUMAN,sp|P28066|PSA5_HUMAN
biological_process	regulation of RNA stability	2	0.68567	sp|Q99436|PSB7_HUMAN,sp|P28066|PSA5_HUMAN
biological_process	regulation of mRNA stability	2	0.68567	sp|Q99436|PSB7_HUMAN,sp|P28066|PSA5_HUMAN
biological_process	ATP metabolic process	2	0.68567	sp|P04406|G3P_HUMAN,sp|P55072|TERA_HUMAN
biological_process	actin cytoskeleton organization	3	0.687249	sp|P35579|MYH9_HUMAN,sp|P50552|VASP_HUMAN,sp|P60953|CDC42_HUMAN
biological_process	negative regulation of apoptotic process	6	0.688232	sp|P02675|FIBB_HUMAN,sp|P02679|FIBG_HUMAN,sp|P12273|PIP_HUMAN,sp|P10909|CLUS_HUMAN,sp|P02545|LMNA_HUMAN,sp|P02671|FIBA_HUMAN
biological_process	skin development	7	0.688443	sp|Q9NSB4|KRT82_HUMAN,sp|P19012|K1C15_HUMAN,sp|P01040|CYTA_HUMAN,sp|Q92764|KRT35_HUMAN,sp|Q14CN4|K2C72_HUMAN,sp|Q6A163|K1C39_HUMAN,sp|P60953|CDC42_HUMAN
biological_process	cellular aromatic compound metabolic process	16	0.69199	sp|P49590|SYHM_HUMAN,sp|O75531|BAF_HUMAN,sp|P43304|GPDM_HUMAN,sp|P16930|FAAA_HUMAN,sp|Q15631|TSN_HUMAN,sp|O75874|IDHC_HUMAN,sp|P46736|BRCC3_HUMAN,sp|P07195|LDHB_HUMAN,sp|P55072|TERA_HUMAN,sp|Q9UL18|AGO1_HUMAN,sp|Q719H9|KCTD1_HUMAN,sp|Q2TAY7|SMU1_HUMAN,sp|P40926|MDHM_HUMAN,sp|P00492|HPRT_HUMAN,sp|P04406|G3P_HUMAN,sp|P12081|SYHC_HUMAN
biological_process	ribose phosphate metabolic process	4	0.693084	sp|P04406|G3P_HUMAN,sp|P06737|PYGL_HUMAN,sp|P55072|TERA_HUMAN,sp|P00492|HPRT_HUMAN
biological_process	metabolic process	53	0.694358	sp|P49590|SYHM_HUMAN,sp|Q15018|ABRX2_HUMAN,sp|Q99436|PSB7_HUMAN,sp|P80108|PHLD_HUMAN,sp|P01040|CYTA_HUMAN,sp|P12273|PIP_HUMAN,sp|P07355|ANXA2_HUMAN,sp|O75874|IDHC_HUMAN,sp|P35052|GPC1_HUMAN,sp|P07195|LDHB_HUMAN,sp|Q8IV08|PLD3_HUMAN,sp|P08582|TRFM_HUMAN,sp|O15296|LX15B_HUMAN,sp|P35579|MYH9_HUMAN,sp|P02652|APOA2_HUMAN,sp|P01034|CYTC_HUMAN,sp|P0C869|PA24B_HUMAN,sp|O75787|RENR_HUMAN,sp|P40926|MDHM_HU…
biological_process	epidermis development	7	0.698002	sp|Q9NSB4|KRT82_HUMAN,sp|P19012|K1C15_HUMAN,sp|P01040|CYTA_HUMAN,sp|Q92764|KRT35_HUMAN,sp|Q14CN4|K2C72_HUMAN,sp|Q6A163|K1C39_HUMAN,sp|P60953|CDC42_HUMAN
biological_process	negative regulation of programmed cell death	6	0.698425	sp|P02675|FIBB_HUMAN,sp|P02679|FIBG_HUMAN,sp|P12273|PIP_HUMAN,sp|P10909|CLUS_HUMAN,sp|P02545|LMNA_HUMAN,sp|P02671|FIBA_HUMAN
biological_process	proteasomal protein catabolic process	3	0.700993	sp|Q99436|PSB7_HUMAN,sp|P28066|PSA5_HUMAN,sp|P55072|TERA_HUMAN
biological_process	small GTPase mediated signal transduction	2	0.7022	sp|P62834|RAP1A_HUMAN,sp|P60953|CDC42_HUMAN
biological_process	negative regulation of cell differentiation	2	0.7022	sp|P61769|B2MG_HUMAN,sp|P08582|TRFM_HUMAN
biological_process	establishment of vesicle localization	2	0.7022	sp|Q96CW1|AP2M1_HUMAN,sp|O00161|SNP23_HUMAN
biological_process	central nervous system development	4	0.705055	sp|P01034|CYTC_HUMAN,sp|O75326|SEM7A_HUMAN,sp|P00492|HPRT_HUMAN,sp|P10909|CLUS_HUMAN
biological_process	peptide metabolic process	5	0.711157	sp|P49590|SYHM_HUMAN,sp|O75874|IDHC_HUMAN,sp|P16870|CBPE_HUMAN,sp|O75787|RENR_HUMAN,sp|P12081|SYHC_HUMAN
biological_process	brain development	3	0.714283	sp|P01034|CYTC_HUMAN,sp|O75326|SEM7A_HUMAN,sp|P00492|HPRT_HUMAN
biological_process	cellular nitrogen compound catabolic process	3	0.714283	sp|Q9UL18|AGO1_HUMAN,sp|P55072|TERA_HUMAN,sp|P00492|HPRT_HUMAN
biological_process	heterocycle catabolic process	3	0.714283	sp|Q9UL18|AGO1_HUMAN,sp|P55072|TERA_HUMAN,sp|P00492|HPRT_HUMAN
biological_process	positive regulation of cell proliferation	4	0.716692	sp|P07355|ANXA2_HUMAN,sp|P01034|CYTC_HUMAN,sp|Q16610|ECM1_HUMAN,sp|P60953|CDC42_HUMAN
biological_process	cellular response to DNA damage stimulus	2	0.718014	sp|P46736|BRCC3_HUMAN,sp|P55072|TERA_HUMAN
biological_process	protein catabolic process	6	0.718157	sp|P07355|ANXA2_HUMAN,sp|Q99436|PSB7_HUMAN,sp|P28066|PSA5_HUMAN,sp|P35052|GPC1_HUMAN,sp|Q96CW1|AP2M1_HUMAN,sp|P55072|TERA_HUMAN
biological_process	regulation of cell cycle	5	0.721605	sp|Q99436|PSB7_HUMAN,sp|P28066|PSA5_HUMAN,sp|P46736|BRCC3_HUMAN,sp|P60953|CDC42_HUMAN,sp|O15296|LX15B_HUMAN
biological_process	protein ubiquitination	3	0.727121	sp|Q99436|PSB7_HUMAN,sp|P28066|PSA5_HUMAN,sp|P55072|TERA_HUMAN
biological_process	viral process	6	0.727693	sp|Q14118|DAG1_HUMAN,sp|P02652|APOA2_HUMAN,sp|Q99436|PSB7_HUMAN,sp|O75531|BAF_HUMAN,sp|Q96CW1|AP2M1_HUMAN,sp|P55072|TERA_HUMAN
biological_process	protein polyubiquitination	2	0.733126	sp|Q99436|PSB7_HUMAN,sp|P28066|PSA5_HUMAN
biological_process	regulation of cellular ketone metabolic process	2	0.733126	sp|Q99436|PSB7_HUMAN,sp|P28066|PSA5_HUMAN
biological_process	vesicle localization	2	0.733126	sp|Q96CW1|AP2M1_HUMAN,sp|O00161|SNP23_HUMAN
biological_process	regulation of mRNA catabolic process	2	0.733126	sp|Q99436|PSB7_HUMAN,sp|P28066|PSA5_HUMAN
biological_process	cellular response to tumor necrosis factor	2	0.733126	sp|Q99436|PSB7_HUMAN,sp|P28066|PSA5_HUMAN
biological_process	protein localization to membrane	2	0.733126	sp|P07355|ANXA2_HUMAN,sp|P16870|CBPE_HUMAN
biological_process	cytokine-mediated signaling pathway	4	0.738971	sp|P07355|ANXA2_HUMAN,sp|Q9UL18|AGO1_HUMAN,sp|Q99436|PSB7_HUMAN,sp|P28066|PSA5_HUMAN
biological_process	ubiquitin-dependent protein catabolic process	3	0.739513	sp|Q99436|PSB7_HUMAN,sp|P28066|PSA5_HUMAN,sp|P55072|TERA_HUMAN
biological_process	multi-organism reproductive process	3	0.739513	sp|P01034|CYTC_HUMAN,sp|P0C869|PA24B_HUMAN,sp|P50990|TCPQ_HUMAN
biological_process	regulation of G2/M transition of mitotic cell cycle	2	0.747554	sp|Q99436|PSB7_HUMAN,sp|P28066|PSA5_HUMAN
biological_process	purine ribonucleotide metabolic process	3	0.751463	sp|P04406|G3P_HUMAN,sp|P55072|TERA_HUMAN,sp|P00492|HPRT_HUMAN
biological_process	modification-dependent protein catabolic process	3	0.751463	sp|Q99436|PSB7_HUMAN,sp|P28066|PSA5_HUMAN,sp|P55072|TERA_HUMAN
biological_process	protein modification by small protein conjugation	3	0.751463	sp|Q99436|PSB7_HUMAN,sp|P28066|PSA5_HUMAN,sp|P55072|TERA_HUMAN
biological_process	regulation of growth	3	0.751463	sp|Q9UL25|RAB21_HUMAN,sp|O75326|SEM7A_HUMAN,sp|O15296|LX15B_HUMAN
biological_process	regulation of protein complex assembly	3	0.751463	sp|P55072|TERA_HUMAN,sp|P50552|VASP_HUMAN,sp|P10909|CLUS_HUMAN
biological_process	modification-dependent macromolecule catabolic process	3	0.751463	sp|Q99436|PSB7_HUMAN,sp|P28066|PSA5_HUMAN,sp|P55072|TERA_HUMAN
biological_process	response to tumor necrosis factor	2	0.761318	sp|Q99436|PSB7_HUMAN,sp|P28066|PSA5_HUMAN
biological_process	regulation of ion transport	2	0.761318	sp|P61769|B2MG_HUMAN,sp|P00918|CAH2_HUMAN
biological_process	positive regulation of transcription from RNA polymerase II promoter	2	0.761318	sp|Q9UL18|AGO1_HUMAN,sp|P02545|LMNA_HUMAN
biological_process	regulation of cell cycle G2/M phase transition	2	0.761318	sp|Q99436|PSB7_HUMAN,sp|P28066|PSA5_HUMAN
biological_process	regulation of cellular macromolecule biosynthetic process	11	0.762683	sp|Q9UL18|AGO1_HUMAN,sp|P01034|CYTC_HUMAN,sp|Q99436|PSB7_HUMAN,sp|Q719H9|KCTD1_HUMAN,sp|Q16610|ECM1_HUMAN,sp|P02545|LMNA_HUMAN,sp|P04406|G3P_HUMAN,sp|P28066|PSA5_HUMAN,sp|P50990|TCPQ_HUMAN,sp|P10909|CLUS_HUMAN,sp|P60953|CDC42_HUMAN
biological_process	ribonucleotide metabolic process	3	0.762978	sp|P04406|G3P_HUMAN,sp|P55072|TERA_HUMAN,sp|P00492|HPRT_HUMAN
biological_process	regulation of cellular response to stress	3	0.762978	sp|P46736|BRCC3_HUMAN,sp|P60953|CDC42_HUMAN,sp|P10909|CLUS_HUMAN
biological_process	heterocycle metabolic process	15	0.767241	sp|P49590|SYHM_HUMAN,sp|Q9UL18|AGO1_HUMAN,sp|O75531|BAF_HUMAN,sp|Q2TAY7|SMU1_HUMAN,sp|Q719H9|KCTD1_HUMAN,sp|P43304|GPDM_HUMAN,sp|P40926|MDHM_HUMAN,sp|P00492|HPRT_HUMAN,sp|Q15631|TSN_HUMAN,sp|P04406|G3P_HUMAN,sp|O75874|IDHC_HUMAN,sp|P46736|BRCC3_HUMAN,sp|P07195|LDHB_HUMAN,sp|P55072|TERA_HUMAN,sp|P12081|SYHC_HUMAN
biological_process	nitrogen compound transport	12	0.769761	sp|P35579|MYH9_HUMAN,sp|Q9UEU0|VTI1B_HUMAN,sp|Q14118|DAG1_HUMAN,sp|P02679|FIBG_HUMAN,sp|Q96CW1|AP2M1_HUMAN,sp|O00161|SNP23_HUMAN,sp|P02545|LMNA_HUMAN,sp|Q9UL25|RAB21_HUMAN,sp|P62834|RAP1A_HUMAN,sp|P55072|TERA_HUMAN,sp|P68871|HBB_HUMAN,sp|P10909|CLUS_HUMAN
biological_process	apoptotic process	4	0.769922	sp|P04406|G3P_HUMAN,sp|P01034|CYTC_HUMAN,sp|O95831|AIFM1_HUMAN,sp|O15296|LX15B_HUMAN
biological_process	RNA metabolic process	6	0.772055	sp|Q15631|TSN_HUMAN,sp|P49590|SYHM_HUMAN,sp|Q9UL18|AGO1_HUMAN,sp|Q2TAY7|SMU1_HUMAN,sp|Q719H9|KCTD1_HUMAN,sp|P12081|SYHC_HUMAN
biological_process	regulation of gene expression	15	0.773223	sp|P35579|MYH9_HUMAN,sp|Q9UL18|AGO1_HUMAN,sp|Q99436|PSB7_HUMAN,sp|Q2TAY7|SMU1_HUMAN,sp|Q719H9|KCTD1_HUMAN,sp|Q16610|ECM1_HUMAN,sp|P01023|A2MG_HUMAN,sp|P12273|PIP_HUMAN,sp|P02545|LMNA_HUMAN,sp|Q15631|TSN_HUMAN,sp|P04406|G3P_HUMAN,sp|P28066|PSA5_HUMAN,sp|P08582|TRFM_HUMAN,sp|P10909|CLUS_HUMAN,sp|P60953|CDC42_HUMAN
biological_process	regulation of cell cycle process	3	0.774065	sp|Q99436|PSB7_HUMAN,sp|P28066|PSA5_HUMAN,sp|P60953|CDC42_HUMAN
biological_process	actin filament-based process	3	0.774065	sp|P35579|MYH9_HUMAN,sp|P50552|VASP_HUMAN,sp|P60953|CDC42_HUMAN
biological_process	cellular response to oxidative stress	2	0.774436	sp|P01034|CYTC_HUMAN,sp|O95831|AIFM1_HUMAN
biological_process	protein transport	11	0.776034	sp|P35579|MYH9_HUMAN,sp|Q9UEU0|VTI1B_HUMAN,sp|Q14118|DAG1_HUMAN,sp|P02679|FIBG_HUMAN,sp|Q96CW1|AP2M1_HUMAN,sp|O00161|SNP23_HUMAN,sp|P02545|LMNA_HUMAN,sp|Q9UL25|RAB21_HUMAN,sp|P62834|RAP1A_HUMAN,sp|P55072|TERA_HUMAN,sp|P10909|CLUS_HUMAN
biological_process	peptide transport	11	0.782516	sp|P35579|MYH9_HUMAN,sp|Q9UEU0|VTI1B_HUMAN,sp|Q14118|DAG1_HUMAN,sp|P02679|FIBG_HUMAN,sp|Q96CW1|AP2M1_HUMAN,sp|O00161|SNP23_HUMAN,sp|P02545|LMNA_HUMAN,sp|Q9UL25|RAB21_HUMAN,sp|P62834|RAP1A_HUMAN,sp|P55072|TERA_HUMAN,sp|P10909|CLUS_HUMAN
biological_process	regulation of mitotic cell cycle	3	0.784732	sp|Q99436|PSB7_HUMAN,sp|P28066|PSA5_HUMAN,sp|P60953|CDC42_HUMAN
biological_process	negative regulation of cellular biosynthetic process	3	0.784732	sp|Q9UL18|AGO1_HUMAN,sp|P04406|G3P_HUMAN,sp|Q719H9|KCTD1_HUMAN
biological_process	nervous system process	3	0.784732	sp|P23280|CAH6_HUMAN,sp|P35237|SPB6_HUMAN,sp|P12273|PIP_HUMAN
biological_process	translation	2	0.78693	sp|P49590|SYHM_HUMAN,sp|P12081|SYHC_HUMAN
biological_process	regulation of translation	2	0.78693	sp|Q9UL18|AGO1_HUMAN,sp|P04406|G3P_HUMAN
biological_process	membrane lipid metabolic process	2	0.78693	sp|P80108|PHLD_HUMAN,sp|A1L3X0|ELOV7_HUMAN
biological_process	organic acid biosynthetic process	2	0.78693	sp|A1L3X0|ELOV7_HUMAN,sp|O15296|LX15B_HUMAN
biological_process	Fc receptor signaling pathway	2	0.78693	sp|Q99436|PSB7_HUMAN,sp|P28066|PSA5_HUMAN
biological_process	carboxylic acid biosynthetic process	2	0.78693	sp|A1L3X0|ELOV7_HUMAN,sp|O15296|LX15B_HUMAN
biological_process	organic substance metabolic process	49	0.792264	sp|P49590|SYHM_HUMAN,sp|Q15018|ABRX2_HUMAN,sp|Q99436|PSB7_HUMAN,sp|P80108|PHLD_HUMAN,sp|P01040|CYTA_HUMAN,sp|P12273|PIP_HUMAN,sp|P07355|ANXA2_HUMAN,sp|O75874|IDHC_HUMAN,sp|P35052|GPC1_HUMAN,sp|P07195|LDHB_HUMAN,sp|Q8IV08|PLD3_HUMAN,sp|P08582|TRFM_HUMAN,sp|O15296|LX15B_HUMAN,sp|P35579|MYH9_HUMAN,sp|P02652|APOA2_HUMAN,sp|P01034|CYTC_HUMAN,sp|P0C869|PA24B_HUMAN,sp|O75787|RENR_HUMAN,sp|P40926|MDHM_HU…
biological_process	amide transport	11	0.795095	sp|P35579|MYH9_HUMAN,sp|Q9UEU0|VTI1B_HUMAN,sp|Q14118|DAG1_HUMAN,sp|P02679|FIBG_HUMAN,sp|Q96CW1|AP2M1_HUMAN,sp|O00161|SNP23_HUMAN,sp|P02545|LMNA_HUMAN,sp|Q9UL25|RAB21_HUMAN,sp|P62834|RAP1A_HUMAN,sp|P55072|TERA_HUMAN,sp|P10909|CLUS_HUMAN
biological_process	regulation of cell growth	2	0.798819	sp|Q9UL25|RAB21_HUMAN,sp|O75326|SEM7A_HUMAN
biological_process	regulation of cytoskeleton organization	2	0.798819	sp|P50552|VASP_HUMAN,sp|P02647|APOA1_HUMAN
biological_process	macromolecule localization	16	0.802686	sp|Q9UEU0|VTI1B_HUMAN,sp|P02679|FIBG_HUMAN,sp|O00161|SNP23_HUMAN,sp|P02647|APOA1_HUMAN,sp|P07355|ANXA2_HUMAN,sp|P16870|CBPE_HUMAN,sp|P55072|TERA_HUMAN,sp|P60953|CDC42_HUMAN,sp|P35579|MYH9_HUMAN,sp|P02652|APOA2_HUMAN,sp|Q14118|DAG1_HUMAN,sp|Q96CW1|AP2M1_HUMAN,sp|P02545|LMNA_HUMAN,sp|Q9UL25|RAB21_HUMAN,sp|P62834|RAP1A_HUMAN,sp|P10909|CLUS_HUMAN
biological_process	purine nucleotide metabolic process	3	0.804838	sp|P04406|G3P_HUMAN,sp|P55072|TERA_HUMAN,sp|P00492|HPRT_HUMAN
biological_process	ribonucleoside triphosphate metabolic process	2	0.810126	sp|P04406|G3P_HUMAN,sp|P55072|TERA_HUMAN
biological_process	purine ribonucleoside triphosphate metabolic process	2	0.810126	sp|P04406|G3P_HUMAN,sp|P55072|TERA_HUMAN
biological_process	protein localization	14	0.811807	sp|P35579|MYH9_HUMAN,sp|Q9UEU0|VTI1B_HUMAN,sp|Q14118|DAG1_HUMAN,sp|P02679|FIBG_HUMAN,sp|Q96CW1|AP2M1_HUMAN,sp|O00161|SNP23_HUMAN,sp|P02545|LMNA_HUMAN,sp|P07355|ANXA2_HUMAN,sp|Q9UL25|RAB21_HUMAN,sp|P16870|CBPE_HUMAN,sp|P62834|RAP1A_HUMAN,sp|P55072|TERA_HUMAN,sp|P10909|CLUS_HUMAN,sp|P60953|CDC42_HUMAN
biological_process	establishment of protein localization	11	0.812998	sp|P35579|MYH9_HUMAN,sp|Q9UEU0|VTI1B_HUMAN,sp|Q14118|DAG1_HUMAN,sp|P02679|FIBG_HUMAN,sp|Q96CW1|AP2M1_HUMAN,sp|O00161|SNP23_HUMAN,sp|P02545|LMNA_HUMAN,sp|Q9UL25|RAB21_HUMAN,sp|P62834|RAP1A_HUMAN,sp|P55072|TERA_HUMAN,sp|P10909|CLUS_HUMAN
biological_process	protein localization to organelle	3	0.814295	sp|Q9UEU0|VTI1B_HUMAN,sp|Q14118|DAG1_HUMAN,sp|P02545|LMNA_HUMAN
biological_process	MAPK cascade	2	0.82087	sp|Q99436|PSB7_HUMAN,sp|P28066|PSA5_HUMAN
biological_process	carbohydrate derivative catabolic process	2	0.82087	sp|P35052|GPC1_HUMAN,sp|P00492|HPRT_HUMAN
biological_process	innate immune response	3	0.823369	sp|P04406|G3P_HUMAN,sp|P02675|FIBB_HUMAN,sp|P02671|FIBA_HUMAN
biological_process	Golgi vesicle transport	3	0.823369	sp|Q9UEU0|VTI1B_HUMAN,sp|O00161|SNP23_HUMAN,sp|P55072|TERA_HUMAN
biological_process	cellular protein localization	8	0.826615	sp|P07355|ANXA2_HUMAN,sp|Q9UEU0|VTI1B_HUMAN,sp|Q14118|DAG1_HUMAN,sp|P16870|CBPE_HUMAN,sp|Q96CW1|AP2M1_HUMAN,sp|P55072|TERA_HUMAN,sp|P60953|CDC42_HUMAN,sp|P02545|LMNA_HUMAN
biological_process	cellular macromolecule localization	8	0.826615	sp|P07355|ANXA2_HUMAN,sp|Q9UEU0|VTI1B_HUMAN,sp|Q14118|DAG1_HUMAN,sp|P16870|CBPE_HUMAN,sp|Q96CW1|AP2M1_HUMAN,sp|P55072|TERA_HUMAN,sp|P60953|CDC42_HUMAN,sp|P02545|LMNA_HUMAN
biological_process	transmembrane receptor protein tyrosine kinase signaling pathway	2	0.831074	sp|P80108|PHLD_HUMAN,sp|Q96CW1|AP2M1_HUMAN
biological_process	purine nucleoside triphosphate metabolic process	2	0.831074	sp|P04406|G3P_HUMAN,sp|P55072|TERA_HUMAN
biological_process	signal transduction by protein phosphorylation	2	0.831074	sp|Q99436|PSB7_HUMAN,sp|P28066|PSA5_HUMAN
biological_process	chromosome organization	2	0.831074	sp|P46736|BRCC3_HUMAN,sp|O95831|AIFM1_HUMAN
biological_process	negative regulation of transferase activity	2	0.831074	sp|Q99436|PSB7_HUMAN,sp|P28066|PSA5_HUMAN
biological_process	transmembrane transport	4	0.831119	sp|Q99436|PSB7_HUMAN,sp|P28066|PSA5_HUMAN,sp|Q9UHW9|S12A6_HUMAN,sp|P12273|PIP_HUMAN
biological_process	negative regulation of protein modification process	3	0.832068	sp|Q14118|DAG1_HUMAN,sp|Q99436|PSB7_HUMAN,sp|P28066|PSA5_HUMAN
biological_process	carbohydrate derivative metabolic process	9	0.834616	sp|Q96DR8|MUCL1_HUMAN,sp|Q14118|DAG1_HUMAN,sp|P43304|GPDM_HUMAN,sp|P80108|PHLD_HUMAN,sp|P00492|HPRT_HUMAN,sp|P04406|G3P_HUMAN,sp|P35052|GPC1_HUMAN,sp|P06737|PYGL_HUMAN,sp|P55072|TERA_HUMAN
biological_process	cellular amide metabolic process	6	0.838241	sp|P49590|SYHM_HUMAN,sp|O75874|IDHC_HUMAN,sp|P16870|CBPE_HUMAN,sp|O75787|RENR_HUMAN,sp|Q9NQR4|NIT2_HUMAN,sp|P12081|SYHC_HUMAN
biological_process	cellular macromolecule catabolic process	6	0.838241	sp|Q9UL18|AGO1_HUMAN,sp|Q99436|PSB7_HUMAN,sp|P28066|PSA5_HUMAN,sp|P35052|GPC1_HUMAN,sp|Q96CW1|AP2M1_HUMAN,sp|P55072|TERA_HUMAN
biological_process	cellular metabolic process	46	0.83969	sp|P49590|SYHM_HUMAN,sp|Q15018|ABRX2_HUMAN,sp|Q99436|PSB7_HUMAN,sp|P80108|PHLD_HUMAN,sp|P01040|CYTA_HUMAN,sp|O75874|IDHC_HUMAN,sp|P35052|GPC1_HUMAN,sp|P07195|LDHB_HUMAN,sp|P08582|TRFM_HUMAN,sp|O15296|LX15B_HUMAN,sp|P02652|APOA2_HUMAN,sp|P01034|CYTC_HUMAN,sp|P0C869|PA24B_HUMAN,sp|O75787|RENR_HUMAN,sp|P40926|MDHM_HUMAN,sp|P02671|FIBA_HUMAN,sp|P04406|G3P_HUMAN,sp|P06737|PYGL_HUMAN,sp|P68871|HBB_HUMA…
biological_process	transcription, DNA-templated	2	0.840757	sp|Q9UL18|AGO1_HUMAN,sp|Q719H9|KCTD1_HUMAN
biological_process	RNA biosynthetic process	2	0.840757	sp|Q9UL18|AGO1_HUMAN,sp|Q719H9|KCTD1_HUMAN
biological_process	nucleic acid-templated transcription	2	0.840757	sp|Q9UL18|AGO1_HUMAN,sp|Q719H9|KCTD1_HUMAN
biological_process	negative regulation of intracellular signal transduction	2	0.840757	sp|Q14118|DAG1_HUMAN,sp|P10909|CLUS_HUMAN
biological_process	macromolecule catabolic process	8	0.844221	sp|P07355|ANXA2_HUMAN,sp|Q9UL18|AGO1_HUMAN,sp|Q99436|PSB7_HUMAN,sp|P28066|PSA5_HUMAN,sp|P35052|GPC1_HUMAN,sp|P06737|PYGL_HUMAN,sp|Q96CW1|AP2M1_HUMAN,sp|P55072|TERA_HUMAN
biological_process	purine-containing compound metabolic process	3	0.848383	sp|P04406|G3P_HUMAN,sp|P55072|TERA_HUMAN,sp|P00492|HPRT_HUMAN
biological_process	ER to Golgi vesicle-mediated transport	2	0.849942	sp|Q9UEU0|VTI1B_HUMAN,sp|P55072|TERA_HUMAN
biological_process	nucleoside triphosphate metabolic process	2	0.849942	sp|P04406|G3P_HUMAN,sp|P55072|TERA_HUMAN
biological_process	peptide biosynthetic process	2	0.849942	sp|P49590|SYHM_HUMAN,sp|P12081|SYHC_HUMAN
biological_process	regulation of mitotic cell cycle phase transition	2	0.849942	sp|Q99436|PSB7_HUMAN,sp|P28066|PSA5_HUMAN
biological_process	cellular protein catabolic process	4	0.85295	sp|Q99436|PSB7_HUMAN,sp|P28066|PSA5_HUMAN,sp|Q96CW1|AP2M1_HUMAN,sp|P55072|TERA_HUMAN
biological_process	positive regulation of transcription, DNA-templated	2	0.858649	sp|Q9UL18|AGO1_HUMAN,sp|P02545|LMNA_HUMAN
biological_process	regulation of cell cycle phase transition	2	0.858649	sp|Q99436|PSB7_HUMAN,sp|P28066|PSA5_HUMAN
biological_process	positive regulation of RNA biosynthetic process	2	0.858649	sp|Q9UL18|AGO1_HUMAN,sp|P02545|LMNA_HUMAN
biological_process	positive regulation of nucleic acid-templated transcription	2	0.858649	sp|Q9UL18|AGO1_HUMAN,sp|P02545|LMNA_HUMAN
biological_process	organic substance catabolic process	16	0.859446	sp|Q3MJ16|PA24E_HUMAN,sp|Q9UL18|AGO1_HUMAN,sp|P02652|APOA2_HUMAN,sp|Q99436|PSB7_HUMAN,sp|P43304|GPDM_HUMAN,sp|P16930|FAAA_HUMAN,sp|P0C869|PA24B_HUMAN,sp|Q96CW1|AP2M1_HUMAN,sp|P00492|HPRT_HUMAN,sp|P07355|ANXA2_HUMAN,sp|P04406|G3P_HUMAN,sp|P28066|PSA5_HUMAN,sp|P35052|GPC1_HUMAN,sp|P06737|PYGL_HUMAN,sp|Q8IV08|PLD3_HUMAN,sp|P55072|TERA_HUMAN
biological_process	cellular biosynthetic process	15	0.863799	sp|Q96DR8|MUCL1_HUMAN,sp|P49590|SYHM_HUMAN,sp|Q9UL18|AGO1_HUMAN,sp|Q14118|DAG1_HUMAN,sp|P02652|APOA2_HUMAN,sp|Q719H9|KCTD1_HUMAN,sp|P80108|PHLD_HUMAN,sp|P0C869|PA24B_HUMAN,sp|A1L3X0|ELOV7_HUMAN,sp|P00492|HPRT_HUMAN,sp|P02647|APOA1_HUMAN,sp|P55072|TERA_HUMAN,sp|P08582|TRFM_HUMAN,sp|O15296|LX15B_HUMAN,sp|P12081|SYHC_HUMAN
biological_process	positive regulation of RNA metabolic process	2	0.882101	sp|Q9UL18|AGO1_HUMAN,sp|P02545|LMNA_HUMAN
biological_process	nucleobase-containing compound biosynthetic process	4	0.884098	sp|Q9UL18|AGO1_HUMAN,sp|Q719H9|KCTD1_HUMAN,sp|P55072|TERA_HUMAN,sp|P00492|HPRT_HUMAN
biological_process	regulation of transcription, DNA-templated	7	0.885704	sp|Q9UL18|AGO1_HUMAN,sp|Q99436|PSB7_HUMAN,sp|P28066|PSA5_HUMAN,sp|Q719H9|KCTD1_HUMAN,sp|Q16610|ECM1_HUMAN,sp|P10909|CLUS_HUMAN,sp|P02545|LMNA_HUMAN
biological_process	cellular chemical homeostasis	3	0.889428	sp|P00918|CAH2_HUMAN,sp|P00450|CERU_HUMAN,sp|P62834|RAP1A_HUMAN
biological_process	regulation of nucleic acid-templated transcription	7	0.890238	sp|Q9UL18|AGO1_HUMAN,sp|Q99436|PSB7_HUMAN,sp|P28066|PSA5_HUMAN,sp|Q719H9|KCTD1_HUMAN,sp|Q16610|ECM1_HUMAN,sp|P10909|CLUS_HUMAN,sp|P02545|LMNA_HUMAN
biological_process	regulation of RNA biosynthetic process	7	0.890238	sp|Q9UL18|AGO1_HUMAN,sp|Q99436|PSB7_HUMAN,sp|P28066|PSA5_HUMAN,sp|Q719H9|KCTD1_HUMAN,sp|Q16610|ECM1_HUMAN,sp|P10909|CLUS_HUMAN,sp|P02545|LMNA_HUMAN
biological_process	regulation of RNA metabolic process	8	0.893076	sp|Q9UL18|AGO1_HUMAN,sp|Q99436|PSB7_HUMAN,sp|Q2TAY7|SMU1_HUMAN,sp|Q719H9|KCTD1_HUMAN,sp|Q16610|ECM1_HUMAN,sp|P02545|LMNA_HUMAN,sp|P28066|PSA5_HUMAN,sp|P10909|CLUS_HUMAN
biological_process	enzyme linked receptor protein signaling pathway	2	0.895705	sp|P80108|PHLD_HUMAN,sp|Q96CW1|AP2M1_HUMAN
biological_process	mRNA metabolic process	2	0.895705	sp|Q9UL18|AGO1_HUMAN,sp|Q2TAY7|SMU1_HUMAN
biological_process	cellular localization	13	0.900006	sp|P35579|MYH9_HUMAN,sp|Q9UEU0|VTI1B_HUMAN,sp|Q14118|DAG1_HUMAN,sp|O75531|BAF_HUMAN,sp|Q96CW1|AP2M1_HUMAN,sp|O00161|SNP23_HUMAN,sp|P02545|LMNA_HUMAN,sp|Q9H190|SDCB2_HUMAN,sp|P07355|ANXA2_HUMAN,sp|Q9UL25|RAB21_HUMAN,sp|P16870|CBPE_HUMAN,sp|P55072|TERA_HUMAN,sp|P60953|CDC42_HUMAN
biological_process	amide biosynthetic process	2	0.901952	sp|P49590|SYHM_HUMAN,sp|P12081|SYHC_HUMAN
biological_process	aromatic compound biosynthetic process	4	0.904789	sp|Q9UL18|AGO1_HUMAN,sp|Q719H9|KCTD1_HUMAN,sp|P55072|TERA_HUMAN,sp|P00492|HPRT_HUMAN
biological_process	proteolysis involved in cellular protein catabolic process	3	0.906022	sp|Q99436|PSB7_HUMAN,sp|P28066|PSA5_HUMAN,sp|P55072|TERA_HUMAN
biological_process	cellular nitrogen compound metabolic process	18	0.90842	sp|P49590|SYHM_HUMAN,sp|O75531|BAF_HUMAN,sp|P43304|GPDM_HUMAN,sp|Q9NQR4|NIT2_HUMAN,sp|Q15631|TSN_HUMAN,sp|O75874|IDHC_HUMAN,sp|P46736|BRCC3_HUMAN,sp|P16870|CBPE_HUMAN,sp|P07195|LDHB_HUMAN,sp|P55072|TERA_HUMAN,sp|Q9UL18|AGO1_HUMAN,sp|Q2TAY7|SMU1_HUMAN,sp|Q719H9|KCTD1_HUMAN,sp|O75787|RENR_HUMAN,sp|P40926|MDHM_HUMAN,sp|P00492|HPRT_HUMAN,sp|P04406|G3P_HUMAN,sp|P12081|SYHC_HUMAN
biological_process	heterocycle biosynthetic process	4	0.909431	sp|Q9UL18|AGO1_HUMAN,sp|Q719H9|KCTD1_HUMAN,sp|P55072|TERA_HUMAN,sp|P00492|HPRT_HUMAN
biological_process	organic cyclic compound biosynthetic process	5	0.910882	sp|Q9UL18|AGO1_HUMAN,sp|Q719H9|KCTD1_HUMAN,sp|P55072|TERA_HUMAN,sp|P00492|HPRT_HUMAN,sp|P02647|APOA1_HUMAN
biological_process	protein phosphorylation	2	0.913426	sp|Q99436|PSB7_HUMAN,sp|P28066|PSA5_HUMAN
biological_process	sulfur compound metabolic process	2	0.918685	sp|O75874|IDHC_HUMAN,sp|A1L3X0|ELOV7_HUMAN
biological_process	catabolic process	18	0.919509	sp|Q99436|PSB7_HUMAN,sp|P43304|GPDM_HUMAN,sp|P16930|FAAA_HUMAN,sp|P07355|ANXA2_HUMAN,sp|P28066|PSA5_HUMAN,sp|P35052|GPC1_HUMAN,sp|Q8IV08|PLD3_HUMAN,sp|P55072|TERA_HUMAN,sp|Q9UL18|AGO1_HUMAN,sp|Q3MJ16|PA24E_HUMAN,sp|P02652|APOA2_HUMAN,sp|P0C869|PA24B_HUMAN,sp|Q96CW1|AP2M1_HUMAN,sp|P00492|HPRT_HUMAN,sp|P04406|G3P_HUMAN,sp|P06737|PYGL_HUMAN,sp|P68871|HBB_HUMAN,sp|P69905|HBA_HUMAN
biological_process	cellular catabolic process	15	0.92421	sp|Q3MJ16|PA24E_HUMAN,sp|Q9UL18|AGO1_HUMAN,sp|P02652|APOA2_HUMAN,sp|Q99436|PSB7_HUMAN,sp|P43304|GPDM_HUMAN,sp|P16930|FAAA_HUMAN,sp|P0C869|PA24B_HUMAN,sp|Q96CW1|AP2M1_HUMAN,sp|P00492|HPRT_HUMAN,sp|P28066|PSA5_HUMAN,sp|P35052|GPC1_HUMAN,sp|P06737|PYGL_HUMAN,sp|P55072|TERA_HUMAN,sp|P68871|HBB_HUMAN,sp|P69905|HBA_HUMAN
biological_process	establishment of localization in cell	9	0.930087	sp|P35579|MYH9_HUMAN,sp|Q9UEU0|VTI1B_HUMAN,sp|O75531|BAF_HUMAN,sp|Q96CW1|AP2M1_HUMAN,sp|O00161|SNP23_HUMAN,sp|Q9H190|SDCB2_HUMAN,sp|Q9UL25|RAB21_HUMAN,sp|P55072|TERA_HUMAN,sp|P60953|CDC42_HUMAN
biological_process	phosphorylation	3	0.932705	sp|P04406|G3P_HUMAN,sp|Q99436|PSB7_HUMAN,sp|P28066|PSA5_HUMAN
biological_process	intracellular transport	8	0.934432	sp|Q9UEU0|VTI1B_HUMAN,sp|O75531|BAF_HUMAN,sp|Q96CW1|AP2M1_HUMAN,sp|O00161|SNP23_HUMAN,sp|Q9H190|SDCB2_HUMAN,sp|Q9UL25|RAB21_HUMAN,sp|P55072|TERA_HUMAN,sp|P60953|CDC42_HUMAN
biological_process	organonitrogen compound catabolic process	8	0.937161	sp|P07355|ANXA2_HUMAN,sp|Q99436|PSB7_HUMAN,sp|P28066|PSA5_HUMAN,sp|P16930|FAAA_HUMAN,sp|P35052|GPC1_HUMAN,sp|Q96CW1|AP2M1_HUMAN,sp|P55072|TERA_HUMAN,sp|P00492|HPRT_HUMAN
biological_process	cellular cation homeostasis	2	0.940805	sp|P00918|CAH2_HUMAN,sp|P00450|CERU_HUMAN
biological_process	cellular ion homeostasis	2	0.944491	sp|P00918|CAH2_HUMAN,sp|P00450|CERU_HUMAN
biological_process	organelle organization	14	0.953879	sp|P35579|MYH9_HUMAN,sp|Q9UEU0|VTI1B_HUMAN,sp|Q14118|DAG1_HUMAN,sp|Q15018|ABRX2_HUMAN,sp|O75531|BAF_HUMAN,sp|Q96CW1|AP2M1_HUMAN,sp|O00161|SNP23_HUMAN,sp|P50552|VASP_HUMAN,sp|P02545|LMNA_HUMAN,sp|P07355|ANXA2_HUMAN,sp|P04406|G3P_HUMAN,sp|P46736|BRCC3_HUMAN,sp|O95831|AIFM1_HUMAN,sp|P60953|CDC42_HUMAN
biological_process	cellular nitrogen compound biosynthetic process	6	0.957223	sp|P49590|SYHM_HUMAN,sp|Q9UL18|AGO1_HUMAN,sp|Q719H9|KCTD1_HUMAN,sp|P55072|TERA_HUMAN,sp|P00492|HPRT_HUMAN,sp|P12081|SYHC_HUMAN
biological_process	intracellular protein transport	3	0.973737	sp|Q9UEU0|VTI1B_HUMAN,sp|Q96CW1|AP2M1_HUMAN,sp|P55072|TERA_HUMAN
biological_process	cellular homeostasis	3	0.97529	sp|P00918|CAH2_HUMAN,sp|P00450|CERU_HUMAN,sp|P62834|RAP1A_HUMAN
biological_process	small molecule catabolic process	2	0.976445	sp|P43304|GPDM_HUMAN,sp|P16930|FAAA_HUMAN
cellular_component	blood microparticle	17	1.47485e-07	sp|P02679|FIBG_HUMAN,sp|P00450|CERU_HUMAN,sp|P02774|VTDB_HUMAN,sp|P02647|APOA1_HUMAN,sp|P02763|A1AG1_HUMAN,sp|P01011|AACT_HUMAN,sp|P02652|APOA2_HUMAN,sp|P01008|ANT3_HUMAN,sp|P01023|A2MG_HUMAN,sp|P02671|FIBA_HUMAN,sp|P00738|HPT_HUMAN,sp|P02675|FIBB_HUMAN,sp|Q08380|LG3BP_HUMAN,sp|P68871|HBB_HUMAN,sp|P10909|CLUS_HUMAN,sp|Q9BYE2|TMPSD_HUMAN,sp|P69905|HBA_HUMAN
cellular_component	platelet alpha granule lumen	7	0.000217807	sp|Q9UEU0|VTI1B_HUMAN,sp|P01011|AACT_HUMAN,sp|P02675|FIBB_HUMAN,sp|P02679|FIBG_HUMAN,sp|P01023|A2MG_HUMAN,sp|P02763|A1AG1_HUMAN,sp|P02671|FIBA_HUMAN
cellular_component	spherical high-density lipoprotein particle	3	0.000379206	sp|P02652|APOA2_HUMAN,sp|P02647|APOA1_HUMAN,sp|P10909|CLUS_HUMAN
cellular_component	platelet alpha granule	7	0.000444885	sp|Q9UEU0|VTI1B_HUMAN,sp|P01011|AACT_HUMAN,sp|P02675|FIBB_HUMAN,sp|P02679|FIBG_HUMAN,sp|P01023|A2MG_HUMAN,sp|P02763|A1AG1_HUMAN,sp|P02671|FIBA_HUMAN
cellular_component	extracellular matrix	16	0.000453528	sp|P80108|PHLD_HUMAN,sp|Q16610|ECM1_HUMAN,sp|P01040|CYTA_HUMAN,sp|P02647|APOA1_HUMAN,sp|P07355|ANXA2_HUMAN,sp|P35052|GPC1_HUMAN,sp|P02763|A1AG1_HUMAN,sp|P30740|ILEU_HUMAN,sp|P35579|MYH9_HUMAN,sp|P01034|CYTC_HUMAN,sp|Q14118|DAG1_HUMAN,sp|P02545|LMNA_HUMAN,sp|P04406|G3P_HUMAN,sp|Q08380|LG3BP_HUMAN,sp|P81605|DCD_HUMAN,sp|P10909|CLUS_HUMAN
cellular_component	proteinaceous extracellular matrix	7	0.000613901	sp|P07355|ANXA2_HUMAN,sp|Q14118|DAG1_HUMAN,sp|P01034|CYTC_HUMAN,sp|P80108|PHLD_HUMAN,sp|Q08380|LG3BP_HUMAN,sp|P35052|GPC1_HUMAN,sp|Q16610|ECM1_HUMAN
cellular_component	vesicle lumen	22	0.000689408	sp|Q9UEU0|VTI1B_HUMAN,sp|Q99436|PSB7_HUMAN,sp|P02679|FIBG_HUMAN,sp|Q16610|ECM1_HUMAN,sp|Q9NQR4|NIT2_HUMAN,sp|P07355|ANXA2_HUMAN,sp|O75874|IDHC_HUMAN,sp|P28066|PSA5_HUMAN,sp|Q99536|VAT1_HUMAN,sp|P02763|A1AG1_HUMAN,sp|P55072|TERA_HUMAN,sp|P50990|TCPQ_HUMAN,sp|P30740|ILEU_HUMAN,sp|P01011|AACT_HUMAN,sp|P01023|A2MG_HUMAN,sp|P02671|FIBA_HUMAN,sp|P00738|HPT_HUMAN,sp|P02675|FIBB_HUMAN,sp|Q08380|LG3BP_HUM…
cellular_component	cytoplasmic vesicle lumen	22	0.000689408	sp|Q9UEU0|VTI1B_HUMAN,sp|Q99436|PSB7_HUMAN,sp|P02679|FIBG_HUMAN,sp|Q16610|ECM1_HUMAN,sp|Q9NQR4|NIT2_HUMAN,sp|P07355|ANXA2_HUMAN,sp|O75874|IDHC_HUMAN,sp|P28066|PSA5_HUMAN,sp|Q99536|VAT1_HUMAN,sp|P02763|A1AG1_HUMAN,sp|P55072|TERA_HUMAN,sp|P50990|TCPQ_HUMAN,sp|P30740|ILEU_HUMAN,sp|P01011|AACT_HUMAN,sp|P01023|A2MG_HUMAN,sp|P02671|FIBA_HUMAN,sp|P00738|HPT_HUMAN,sp|P02675|FIBB_HUMAN,sp|Q08380|LG3BP_HUM…
cellular_component	haptoglobin-hemoglobin complex	3	0.00143614	sp|P00738|HPT_HUMAN,sp|P68871|HBB_HUMAN,sp|P69905|HBA_HUMAN
cellular_component	external side of plasma membrane	7	0.00185602	sp|Q14118|DAG1_HUMAN,sp|P61769|B2MG_HUMAN,sp|P02675|FIBB_HUMAN,sp|P02679|FIBG_HUMAN,sp|O75326|SEM7A_HUMAN,sp|O75787|RENR_HUMAN,sp|P02671|FIBA_HUMAN
cellular_component	secretory granule	30	0.00190304	sp|Q9UEU0|VTI1B_HUMAN,sp|Q99436|PSB7_HUMAN,sp|P02679|FIBG_HUMAN,sp|Q16610|ECM1_HUMAN,sp|Q9NQR4|NIT2_HUMAN,sp|O00161|SNP23_HUMAN,sp|P07355|ANXA2_HUMAN,sp|P28066|PSA5_HUMAN,sp|O75874|IDHC_HUMAN,sp|Q99536|VAT1_HUMAN,sp|P16870|CBPE_HUMAN,sp|P02763|A1AG1_HUMAN,sp|P55072|TERA_HUMAN,sp|P50990|TCPQ_HUMAN,sp|P30740|ILEU_HUMAN,sp|P60953|CDC42_HUMAN,sp|P01034|CYTC_HUMAN,sp|P01011|AACT_HUMAN,sp|O75787|RENR_H…
cellular_component	secretory granule lumen	20	0.00236577	sp|Q9UEU0|VTI1B_HUMAN,sp|Q99436|PSB7_HUMAN,sp|P02679|FIBG_HUMAN,sp|Q16610|ECM1_HUMAN,sp|Q9NQR4|NIT2_HUMAN,sp|P07355|ANXA2_HUMAN,sp|O75874|IDHC_HUMAN,sp|P28066|PSA5_HUMAN,sp|Q99536|VAT1_HUMAN,sp|P02763|A1AG1_HUMAN,sp|P55072|TERA_HUMAN,sp|P50990|TCPQ_HUMAN,sp|P30740|ILEU_HUMAN,sp|P01011|AACT_HUMAN,sp|P01023|A2MG_HUMAN,sp|P02671|FIBA_HUMAN,sp|P00738|HPT_HUMAN,sp|P02675|FIBB_HUMAN,sp|Q08380|LG3BP_HUM…
cellular_component	cell surface	13	0.00304776	sp|P35579|MYH9_HUMAN,sp|Q14118|DAG1_HUMAN,sp|P61769|B2MG_HUMAN,sp|P02679|FIBG_HUMAN,sp|O75326|SEM7A_HUMAN,sp|O75787|RENR_HUMAN,sp|P02647|APOA1_HUMAN,sp|P02671|FIBA_HUMAN,sp|P07355|ANXA2_HUMAN,sp|P02675|FIBB_HUMAN,sp|Q9UL25|RAB21_HUMAN,sp|P08582|TRFM_HUMAN,sp|P10909|CLUS_HUMAN
cellular_component	fibrinogen complex	3	0.00339998	sp|P02675|FIBB_HUMAN,sp|P02679|FIBG_HUMAN,sp|P02671|FIBA_HUMAN
cellular_component	secretory vesicle	30	0.00414357	sp|Q9UEU0|VTI1B_HUMAN,sp|Q99436|PSB7_HUMAN,sp|P02679|FIBG_HUMAN,sp|Q16610|ECM1_HUMAN,sp|Q9NQR4|NIT2_HUMAN,sp|O00161|SNP23_HUMAN,sp|P07355|ANXA2_HUMAN,sp|P28066|PSA5_HUMAN,sp|O75874|IDHC_HUMAN,sp|Q99536|VAT1_HUMAN,sp|P16870|CBPE_HUMAN,sp|P02763|A1AG1_HUMAN,sp|P55072|TERA_HUMAN,sp|P50990|TCPQ_HUMAN,sp|P30740|ILEU_HUMAN,sp|P60953|CDC42_HUMAN,sp|P01034|CYTC_HUMAN,sp|P01011|AACT_HUMAN,sp|O75787|RENR_H…
cellular_component	contractile ring	2	0.00529222	sp|P35579|MYH9_HUMAN,sp|Q14118|DAG1_HUMAN
cellular_component	basement membrane	3	0.0106771	sp|P07355|ANXA2_HUMAN,sp|Q14118|DAG1_HUMAN,sp|P01034|CYTC_HUMAN
cellular_component	extracellular matrix component	3	0.0106771	sp|P07355|ANXA2_HUMAN,sp|Q14118|DAG1_HUMAN,sp|P01034|CYTC_HUMAN
cellular_component	tertiary granule	9	0.0106935	sp|P01034|CYTC_HUMAN,sp|O75787|RENR_HUMAN,sp|Q9NQR4|NIT2_HUMAN,sp|O00161|SNP23_HUMAN,sp|P00738|HPT_HUMAN,sp|O75874|IDHC_HUMAN,sp|P02763|A1AG1_HUMAN,sp|P68871|HBB_HUMAN,sp|P35237|SPB6_HUMAN
cellular_component	tertiary granule lumen	6	0.0131331	sp|P00738|HPT_HUMAN,sp|P01034|CYTC_HUMAN,sp|O75874|IDHC_HUMAN,sp|Q9NQR4|NIT2_HUMAN,sp|P02763|A1AG1_HUMAN,sp|P68871|HBB_HUMAN
cellular_component	extracellular region	71	0.0137055	sp|P01040|CYTA_HUMAN,sp|O75874|IDHC_HUMAN,sp|P35052|GPC1_HUMAN,sp|P30740|ILEU_HUMAN,sp|P08582|TRFM_HUMAN,sp|O15296|LX15B_HUMAN,sp|P0C869|PA24B_HUMAN,sp|O75787|RENR_HUMAN,sp|P02671|FIBA_HUMAN,sp|P02545|LMNA_HUMAN,sp|P04406|G3P_HUMAN,sp|P00738|HPT_HUMAN,sp|Q08380|LG3BP_HUMAN,sp|P19012|K1C15_HUMAN,sp|P81605|DCD_HUMAN,sp|P62834|RAP1A_HUMAN,sp|P10909|CLUS_HUMAN,sp|Q9UEU0|VTI1B_HUMAN,sp|O75531|BAF_HUMA…
cellular_component	BRISC complex	2	0.0151183	sp|Q15018|ABRX2_HUMAN,sp|P46736|BRCC3_HUMAN
cellular_component	high-density lipoprotein particle	3	0.0161864	sp|P02652|APOA2_HUMAN,sp|P02647|APOA1_HUMAN,sp|P10909|CLUS_HUMAN
cellular_component	tertiary granule membrane	3	0.0230091	sp|O75787|RENR_HUMAN,sp|O00161|SNP23_HUMAN,sp|P35237|SPB6_HUMAN
cellular_component	endocytic vesicle lumen	3	0.0230091	sp|P00738|HPT_HUMAN,sp|P68871|HBB_HUMAN,sp|P69905|HBA_HUMAN
cellular_component	membrane-enclosed lumen	46	0.0281626	sp|P49590|SYHM_HUMAN,sp|Q99436|PSB7_HUMAN,sp|P33764|S10A3_HUMAN,sp|P07355|ANXA2_HUMAN,sp|O75874|IDHC_HUMAN,sp|P35052|GPC1_HUMAN,sp|P02763|A1AG1_HUMAN,sp|P30740|ILEU_HUMAN,sp|P08582|TRFM_HUMAN,sp|P02652|APOA2_HUMAN,sp|P01034|CYTC_HUMAN,sp|P01011|AACT_HUMAN,sp|P40926|MDHM_HUMAN,sp|P02671|FIBA_HUMAN,sp|P02545|LMNA_HUMAN,sp|P00738|HPT_HUMAN,sp|Q9NTM9|CUTC_HUMAN,sp|Q08380|LG3BP_HUMAN,sp|P06737|PYGL_HU…
cellular_component	organelle lumen	46	0.0281626	sp|P49590|SYHM_HUMAN,sp|Q99436|PSB7_HUMAN,sp|P33764|S10A3_HUMAN,sp|P07355|ANXA2_HUMAN,sp|O75874|IDHC_HUMAN,sp|P35052|GPC1_HUMAN,sp|P02763|A1AG1_HUMAN,sp|P30740|ILEU_HUMAN,sp|P08582|TRFM_HUMAN,sp|P02652|APOA2_HUMAN,sp|P01034|CYTC_HUMAN,sp|P01011|AACT_HUMAN,sp|P40926|MDHM_HUMAN,sp|P02671|FIBA_HUMAN,sp|P02545|LMNA_HUMAN,sp|P00738|HPT_HUMAN,sp|Q9NTM9|CUTC_HUMAN,sp|Q08380|LG3BP_HUMAN,sp|P06737|PYGL_HU…
cellular_component	intracellular organelle lumen	46	0.0281626	sp|P49590|SYHM_HUMAN,sp|Q99436|PSB7_HUMAN,sp|P33764|S10A3_HUMAN,sp|P07355|ANXA2_HUMAN,sp|O75874|IDHC_HUMAN,sp|P35052|GPC1_HUMAN,sp|P02763|A1AG1_HUMAN,sp|P30740|ILEU_HUMAN,sp|P08582|TRFM_HUMAN,sp|P02652|APOA2_HUMAN,sp|P01034|CYTC_HUMAN,sp|P01011|AACT_HUMAN,sp|P40926|MDHM_HUMAN,sp|P02671|FIBA_HUMAN,sp|P02545|LMNA_HUMAN,sp|P00738|HPT_HUMAN,sp|Q9NTM9|CUTC_HUMAN,sp|Q08380|LG3BP_HUMAN,sp|P06737|PYGL_HU…
cellular_component	cell division site	2	0.0288004	sp|P35579|MYH9_HUMAN,sp|Q9UL25|RAB21_HUMAN
cellular_component	cleavage furrow	2	0.0288004	sp|P35579|MYH9_HUMAN,sp|Q9UL25|RAB21_HUMAN
cellular_component	cell division site part	2	0.0288004	sp|P35579|MYH9_HUMAN,sp|Q9UL25|RAB21_HUMAN
cellular_component	cell surface furrow	2	0.0288004	sp|P35579|MYH9_HUMAN,sp|Q9UL25|RAB21_HUMAN
cellular_component	basolateral plasma membrane	4	0.0304751	sp|P07355|ANXA2_HUMAN,sp|Q14118|DAG1_HUMAN,sp|P00918|CAH2_HUMAN,sp|Q9UHW9|S12A6_HUMAN
cellular_component	endoplasmic reticulum lumen	8	0.031082	sp|Q14118|DAG1_HUMAN,sp|P02652|APOA2_HUMAN,sp|P01034|CYTC_HUMAN,sp|P02679|FIBG_HUMAN,sp|P01008|ANT3_HUMAN,sp|P00450|CERU_HUMAN,sp|P02671|FIBA_HUMAN,sp|P08582|TRFM_HUMAN
cellular_component	extracellular exosome	63	0.0357727	sp|Q99436|PSB7_HUMAN,sp|P80108|PHLD_HUMAN,sp|P01040|CYTA_HUMAN,sp|P12273|PIP_HUMAN,sp|P07355|ANXA2_HUMAN,sp|O75874|IDHC_HUMAN,sp|P35052|GPC1_HUMAN,sp|P07195|LDHB_HUMAN,sp|P02763|A1AG1_HUMAN,sp|Q8IV08|PLD3_HUMAN,sp|P30740|ILEU_HUMAN,sp|P08582|TRFM_HUMAN,sp|O15296|LX15B_HUMAN,sp|P35579|MYH9_HUMAN,sp|P02652|APOA2_HUMAN,sp|P01034|CYTC_HUMAN,sp|P01011|AACT_HUMAN,sp|O75787|RENR_HUMAN,sp|P40926|MDHM_HUM…
cellular_component	extracellular region part	67	0.0365681	sp|P01040|CYTA_HUMAN,sp|O75874|IDHC_HUMAN,sp|P35052|GPC1_HUMAN,sp|P30740|ILEU_HUMAN,sp|P08582|TRFM_HUMAN,sp|O15296|LX15B_HUMAN,sp|O75787|RENR_HUMAN,sp|P02671|FIBA_HUMAN,sp|P02545|LMNA_HUMAN,sp|P04406|G3P_HUMAN,sp|P00738|HPT_HUMAN,sp|Q08380|LG3BP_HUMAN,sp|P19012|K1C15_HUMAN,sp|P81605|DCD_HUMAN,sp|P62834|RAP1A_HUMAN,sp|P10909|CLUS_HUMAN,sp|O75531|BAF_HUMAN,sp|Q16610|ECM1_HUMAN,sp|P00450|CERU_HUMAN,…
cellular_component	extracellular organelle	63	0.0370325	sp|Q99436|PSB7_HUMAN,sp|P80108|PHLD_HUMAN,sp|P01040|CYTA_HUMAN,sp|P12273|PIP_HUMAN,sp|P07355|ANXA2_HUMAN,sp|O75874|IDHC_HUMAN,sp|P35052|GPC1_HUMAN,sp|P07195|LDHB_HUMAN,sp|P02763|A1AG1_HUMAN,sp|Q8IV08|PLD3_HUMAN,sp|P30740|ILEU_HUMAN,sp|P08582|TRFM_HUMAN,sp|O15296|LX15B_HUMAN,sp|P35579|MYH9_HUMAN,sp|P02652|APOA2_HUMAN,sp|P01034|CYTC_HUMAN,sp|P01011|AACT_HUMAN,sp|O75787|RENR_HUMAN,sp|P40926|MDHM_HUM…
cellular_component	extracellular vesicle	63	0.0370325	sp|Q99436|PSB7_HUMAN,sp|P80108|PHLD_HUMAN,sp|P01040|CYTA_HUMAN,sp|P12273|PIP_HUMAN,sp|P07355|ANXA2_HUMAN,sp|O75874|IDHC_HUMAN,sp|P35052|GPC1_HUMAN,sp|P07195|LDHB_HUMAN,sp|P02763|A1AG1_HUMAN,sp|Q8IV08|PLD3_HUMAN,sp|P30740|ILEU_HUMAN,sp|P08582|TRFM_HUMAN,sp|O15296|LX15B_HUMAN,sp|P35579|MYH9_HUMAN,sp|P02652|APOA2_HUMAN,sp|P01034|CYTC_HUMAN,sp|P01011|AACT_HUMAN,sp|O75787|RENR_HUMAN,sp|P40926|MDHM_HUM…
cellular_component	Golgi lumen	3	0.0406134	sp|Q96DR8|MUCL1_HUMAN,sp|Q14118|DAG1_HUMAN,sp|P35052|GPC1_HUMAN
cellular_component	protein-lipid complex	3	0.0406134	sp|P02652|APOA2_HUMAN,sp|P02647|APOA1_HUMAN,sp|P10909|CLUS_HUMAN
cellular_component	plasma lipoprotein particle	3	0.0406134	sp|P02652|APOA2_HUMAN,sp|P02647|APOA1_HUMAN,sp|P10909|CLUS_HUMAN
cellular_component	lipoprotein particle	3	0.0406134	sp|P02652|APOA2_HUMAN,sp|P02647|APOA1_HUMAN,sp|P10909|CLUS_HUMAN
cellular_component	extracellular space	66	0.0455918	sp|P01040|CYTA_HUMAN,sp|O75874|IDHC_HUMAN,sp|P35052|GPC1_HUMAN,sp|P30740|ILEU_HUMAN,sp|P08582|TRFM_HUMAN,sp|O15296|LX15B_HUMAN,sp|O75787|RENR_HUMAN,sp|P02671|FIBA_HUMAN,sp|P04406|G3P_HUMAN,sp|P00738|HPT_HUMAN,sp|Q08380|LG3BP_HUMAN,sp|P19012|K1C15_HUMAN,sp|P81605|DCD_HUMAN,sp|P62834|RAP1A_HUMAN,sp|P10909|CLUS_HUMAN,sp|O75531|BAF_HUMAN,sp|Q16610|ECM1_HUMAN,sp|P00450|CERU_HUMAN,sp|P02647|APOA1_HUMAN…
cellular_component	hemoglobin complex	2	0.045734	sp|P68871|HBB_HUMAN,sp|P69905|HBA_HUMAN
cellular_component	lamellipodium membrane	2	0.045734	sp|P50552|VASP_HUMAN,sp|P60953|CDC42_HUMAN
cellular_component	cytoplasmic vesicle part	31	0.0567804	sp|Q9UEU0|VTI1B_HUMAN,sp|Q99436|PSB7_HUMAN,sp|P02679|FIBG_HUMAN,sp|Q16610|ECM1_HUMAN,sp|Q9NQR4|NIT2_HUMAN,sp|O00161|SNP23_HUMAN,sp|P07355|ANXA2_HUMAN,sp|P28066|PSA5_HUMAN,sp|O75874|IDHC_HUMAN,sp|Q99536|VAT1_HUMAN,sp|P16870|CBPE_HUMAN,sp|P02763|A1AG1_HUMAN,sp|P55072|TERA_HUMAN,sp|P50990|TCPQ_HUMAN,sp|P30740|ILEU_HUMAN,sp|P01034|CYTC_HUMAN,sp|P01011|AACT_HUMAN,sp|P0C869|PA24B_HUMAN,sp|O75787|RENR_H…
cellular_component	plasma membrane part	19	0.0624804	sp|P61769|B2MG_HUMAN,sp|P02679|FIBG_HUMAN,sp|P50552|VASP_HUMAN,sp|P12273|PIP_HUMAN,sp|P07355|ANXA2_HUMAN,sp|P35052|GPC1_HUMAN,sp|P16870|CBPE_HUMAN,sp|P08582|TRFM_HUMAN,sp|P60953|CDC42_HUMAN,sp|P35579|MYH9_HUMAN,sp|Q14118|DAG1_HUMAN,sp|P00918|CAH2_HUMAN,sp|O75326|SEM7A_HUMAN,sp|O75787|RENR_HUMAN,sp|Q96CW1|AP2M1_HUMAN,sp|P02671|FIBA_HUMAN,sp|P02675|FIBB_HUMAN,sp|Q9UL25|RAB21_HUMAN,sp|Q9UHW9|S12A6_H…
cellular_component	side of membrane	8	0.0651496	sp|Q14118|DAG1_HUMAN,sp|P61769|B2MG_HUMAN,sp|P02679|FIBG_HUMAN,sp|O75326|SEM7A_HUMAN,sp|O75787|RENR_HUMAN,sp|P02671|FIBA_HUMAN,sp|P02675|FIBB_HUMAN,sp|Q9UL25|RAB21_HUMAN
cellular_component	platelet dense granule lumen	2	0.0653807	sp|Q08380|LG3BP_HUMAN,sp|Q16610|ECM1_HUMAN
cellular_component	cell-cell adherens junction	4	0.0708257	sp|P35579|MYH9_HUMAN,sp|P07355|ANXA2_HUMAN,sp|Q14118|DAG1_HUMAN,sp|O00161|SNP23_HUMAN
cellular_component	spindle	4	0.0811107	sp|P35579|MYH9_HUMAN,sp|Q15018|ABRX2_HUMAN,sp|P46736|BRCC3_HUMAN,sp|P60953|CDC42_HUMAN
cellular_component	centrosome	4	0.103755	sp|Q15018|ABRX2_HUMAN,sp|Q9NQR4|NIT2_HUMAN,sp|P50990|TCPQ_HUMAN,sp|P60953|CDC42_HUMAN
cellular_component	lipid droplet	3	0.10588	sp|P07355|ANXA2_HUMAN,sp|P04406|G3P_HUMAN,sp|P55072|TERA_HUMAN
cellular_component	midbody	3	0.10588	sp|P07355|ANXA2_HUMAN,sp|Q15018|ABRX2_HUMAN,sp|P60953|CDC42_HUMAN
cellular_component	spindle pole	2	0.110954	sp|Q15018|ABRX2_HUMAN,sp|P46736|BRCC3_HUMAN
cellular_component	chylomicron	2	0.110954	sp|P02652|APOA2_HUMAN,sp|P02647|APOA1_HUMAN
cellular_component	platelet dense granule	2	0.110954	sp|Q08380|LG3BP_HUMAN,sp|Q16610|ECM1_HUMAN
cellular_component	early endosome	6	0.122355	sp|P07355|ANXA2_HUMAN,sp|Q9UEU0|VTI1B_HUMAN,sp|P02652|APOA2_HUMAN,sp|Q9UL25|RAB21_HUMAN,sp|P0C869|PA24B_HUMAN,sp|P62834|RAP1A_HUMAN
cellular_component	very-low-density lipoprotein particle	2	0.136081	sp|P02652|APOA2_HUMAN,sp|P02647|APOA1_HUMAN
cellular_component	triglyceride-rich plasma lipoprotein particle	2	0.136081	sp|P02652|APOA2_HUMAN,sp|P02647|APOA1_HUMAN
cellular_component	plasma membrane receptor complex	2	0.136081	sp|P35579|MYH9_HUMAN,sp|P61769|B2MG_HUMAN
cellular_component	cytoplasmic vesicle	36	0.144172	sp|Q99436|PSB7_HUMAN,sp|P07355|ANXA2_HUMAN,sp|O75874|IDHC_HUMAN,sp|P35052|GPC1_HUMAN,sp|P02763|A1AG1_HUMAN,sp|P30740|ILEU_HUMAN,sp|P02652|APOA2_HUMAN,sp|P01034|CYTC_HUMAN,sp|P01011|AACT_HUMAN,sp|P0C869|PA24B_HUMAN,sp|O75787|RENR_HUMAN,sp|P02671|FIBA_HUMAN,sp|P00738|HPT_HUMAN,sp|Q08380|LG3BP_HUMAN,sp|P06737|PYGL_HUMAN,sp|P62834|RAP1A_HUMAN,sp|P68871|HBB_HUMAN,sp|P69905|HBA_HUMAN,sp|P35237|SPB6_HUM…
cellular_component	intracellular vesicle	36	0.144172	sp|Q99436|PSB7_HUMAN,sp|P07355|ANXA2_HUMAN,sp|O75874|IDHC_HUMAN,sp|P35052|GPC1_HUMAN,sp|P02763|A1AG1_HUMAN,sp|P30740|ILEU_HUMAN,sp|P02652|APOA2_HUMAN,sp|P01034|CYTC_HUMAN,sp|P01011|AACT_HUMAN,sp|P0C869|PA24B_HUMAN,sp|O75787|RENR_HUMAN,sp|P02671|FIBA_HUMAN,sp|P00738|HPT_HUMAN,sp|Q08380|LG3BP_HUMAN,sp|P06737|PYGL_HUMAN,sp|P62834|RAP1A_HUMAN,sp|P68871|HBB_HUMAN,sp|P69905|HBA_HUMAN,sp|P35237|SPB6_HUM…
cellular_component	specific granule	5	0.150222	sp|P00738|HPT_HUMAN,sp|Q9NQR4|NIT2_HUMAN,sp|P02763|A1AG1_HUMAN,sp|P62834|RAP1A_HUMAN,sp|O00161|SNP23_HUMAN
cellular_component	endocytic vesicle	7	0.151215	sp|P00738|HPT_HUMAN,sp|P62834|RAP1A_HUMAN,sp|Q96CW1|AP2M1_HUMAN,sp|O00161|SNP23_HUMAN,sp|P68871|HBB_HUMAN,sp|P69905|HBA_HUMAN,sp|P02647|APOA1_HUMAN
cellular_component	plasma membrane protein complex	4	0.156491	sp|P35579|MYH9_HUMAN,sp|Q14118|DAG1_HUMAN,sp|P61769|B2MG_HUMAN,sp|Q96CW1|AP2M1_HUMAN
cellular_component	anchored component of membrane	3	0.156789	sp|O75326|SEM7A_HUMAN,sp|P35052|GPC1_HUMAN,sp|P08582|TRFM_HUMAN
cellular_component	ficolin-1-rich granule	9	0.16916	sp|P01034|CYTC_HUMAN,sp|Q99436|PSB7_HUMAN,sp|O75787|RENR_HUMAN,sp|O75874|IDHC_HUMAN,sp|P28066|PSA5_HUMAN,sp|P06737|PYGL_HUMAN,sp|P68871|HBB_HUMAN,sp|P50990|TCPQ_HUMAN,sp|P35237|SPB6_HUMAN
cellular_component	axon	5	0.174725	sp|Q14118|DAG1_HUMAN,sp|P01034|CYTC_HUMAN,sp|P00918|CAH2_HUMAN,sp|Q9UL25|RAB21_HUMAN,sp|Q96CW1|AP2M1_HUMAN
cellular_component	perinuclear region of cytoplasm	9	0.186434	sp|P07355|ANXA2_HUMAN,sp|P26447|S10A4_HUMAN,sp|Q9UEU0|VTI1B_HUMAN,sp|P01034|CYTC_HUMAN,sp|O95831|AIFM1_HUMAN,sp|P62834|RAP1A_HUMAN,sp|P55072|TERA_HUMAN,sp|P10909|CLUS_HUMAN,sp|P02545|LMNA_HUMAN
cellular_component	nuclear speck	3	0.194195	sp|Q9H190|SDCB2_HUMAN,sp|Q2TAY7|SMU1_HUMAN,sp|P02545|LMNA_HUMAN
cellular_component	early endosome membrane	3	0.194195	sp|Q9UEU0|VTI1B_HUMAN,sp|Q9UL25|RAB21_HUMAN,sp|P0C869|PA24B_HUMAN
cellular_component	cytoplasmic region	5	0.200666	sp|P35579|MYH9_HUMAN,sp|P07355|ANXA2_HUMAN,sp|P02675|FIBB_HUMAN,sp|Q9UL25|RAB21_HUMAN,sp|P02671|FIBA_HUMAN
cellular_component	ficolin-1-rich granule lumen	7	0.212261	sp|P01034|CYTC_HUMAN,sp|Q99436|PSB7_HUMAN,sp|P28066|PSA5_HUMAN,sp|O75874|IDHC_HUMAN,sp|P06737|PYGL_HUMAN,sp|P50990|TCPQ_HUMAN,sp|P68871|HBB_HUMAN
cellular_component	plasma membrane bounded cell projection	15	0.213437	sp|P35579|MYH9_HUMAN,sp|Q14118|DAG1_HUMAN,sp|P01034|CYTC_HUMAN,sp|P00918|CAH2_HUMAN,sp|O75787|RENR_HUMAN,sp|Q96CW1|AP2M1_HUMAN,sp|O00161|SNP23_HUMAN,sp|P50552|VASP_HUMAN,sp|P26447|S10A4_HUMAN,sp|P07355|ANXA2_HUMAN,sp|Q9UL25|RAB21_HUMAN,sp|P62834|RAP1A_HUMAN,sp|P50990|TCPQ_HUMAN,sp|P10909|CLUS_HUMAN,sp|P60953|CDC42_HUMAN
cellular_component	axon part	3	0.213674	sp|Q14118|DAG1_HUMAN,sp|Q9UL25|RAB21_HUMAN,sp|Q96CW1|AP2M1_HUMAN
cellular_component	microtubule cytoskeleton	8	0.21378	sp|P35579|MYH9_HUMAN,sp|P04406|G3P_HUMAN,sp|Q15018|ABRX2_HUMAN,sp|P46736|BRCC3_HUMAN,sp|Q9NQR4|NIT2_HUMAN,sp|P50990|TCPQ_HUMAN,sp|Q9HC35|EMAL4_HUMAN,sp|P60953|CDC42_HUMAN
cellular_component	SNARE complex	2	0.216958	sp|Q9UEU0|VTI1B_HUMAN,sp|O00161|SNP23_HUMAN
cellular_component	nuclear periphery	2	0.216958	sp|Q14118|DAG1_HUMAN,sp|P02545|LMNA_HUMAN
cellular_component	neuron projection	10	0.221583	sp|Q14118|DAG1_HUMAN,sp|P01034|CYTC_HUMAN,sp|P00918|CAH2_HUMAN,sp|O75787|RENR_HUMAN,sp|Q96CW1|AP2M1_HUMAN,sp|O00161|SNP23_HUMAN,sp|P26447|S10A4_HUMAN,sp|Q9UL25|RAB21_HUMAN,sp|P62834|RAP1A_HUMAN,sp|P10909|CLUS_HUMAN
cellular_component	endomembrane system	46	0.221923	sp|Q99436|PSB7_HUMAN,sp|P07355|ANXA2_HUMAN,sp|O75874|IDHC_HUMAN,sp|P35052|GPC1_HUMAN,sp|P02763|A1AG1_HUMAN,sp|Q8IV08|PLD3_HUMAN,sp|P30740|ILEU_HUMAN,sp|P08582|TRFM_HUMAN,sp|P02652|APOA2_HUMAN,sp|P01034|CYTC_HUMAN,sp|P01011|AACT_HUMAN,sp|P0C869|PA24B_HUMAN,sp|O75787|RENR_HUMAN,sp|P02671|FIBA_HUMAN,sp|P02545|LMNA_HUMAN,sp|P04406|G3P_HUMAN,sp|P00738|HPT_HUMAN,sp|Q08380|LG3BP_HUMAN,sp|P06737|PYGL_HUM…
cellular_component	plasma membrane region	8	0.223934	sp|P07355|ANXA2_HUMAN,sp|Q14118|DAG1_HUMAN,sp|P00918|CAH2_HUMAN,sp|P16870|CBPE_HUMAN,sp|Q9UHW9|S12A6_HUMAN,sp|P50552|VASP_HUMAN,sp|P12273|PIP_HUMAN,sp|P60953|CDC42_HUMAN
cellular_component	neuron part	12	0.224579	sp|Q9UEU0|VTI1B_HUMAN,sp|Q14118|DAG1_HUMAN,sp|P01034|CYTC_HUMAN,sp|P00918|CAH2_HUMAN,sp|O75787|RENR_HUMAN,sp|Q96CW1|AP2M1_HUMAN,sp|O00161|SNP23_HUMAN,sp|P26447|S10A4_HUMAN,sp|Q9UL25|RAB21_HUMAN,sp|P16870|CBPE_HUMAN,sp|P62834|RAP1A_HUMAN,sp|P10909|CLUS_HUMAN
cellular_component	cell-cell junction	6	0.232736	sp|P35579|MYH9_HUMAN,sp|P07355|ANXA2_HUMAN,sp|Q14118|DAG1_HUMAN,sp|O00161|SNP23_HUMAN,sp|P50552|VASP_HUMAN,sp|P60953|CDC42_HUMAN
cellular_component	cell cortex	4	0.233279	sp|P35579|MYH9_HUMAN,sp|P07355|ANXA2_HUMAN,sp|P02675|FIBB_HUMAN,sp|P02671|FIBA_HUMAN
cellular_component	lamellipodium	3	0.233558	sp|Q14118|DAG1_HUMAN,sp|P50552|VASP_HUMAN,sp|P60953|CDC42_HUMAN
cellular_component	cell projection	15	0.242551	sp|P35579|MYH9_HUMAN,sp|Q14118|DAG1_HUMAN,sp|P01034|CYTC_HUMAN,sp|P00918|CAH2_HUMAN,sp|O75787|RENR_HUMAN,sp|Q96CW1|AP2M1_HUMAN,sp|O00161|SNP23_HUMAN,sp|P50552|VASP_HUMAN,sp|P26447|S10A4_HUMAN,sp|P07355|ANXA2_HUMAN,sp|Q9UL25|RAB21_HUMAN,sp|P62834|RAP1A_HUMAN,sp|P50990|TCPQ_HUMAN,sp|P10909|CLUS_HUMAN,sp|P60953|CDC42_HUMAN
cellular_component	specific granule membrane	2	0.244895	sp|P62834|RAP1A_HUMAN,sp|O00161|SNP23_HUMAN
cellular_component	vesicle	66	0.248469	sp|P01040|CYTA_HUMAN,sp|O75874|IDHC_HUMAN,sp|P35052|GPC1_HUMAN,sp|P30740|ILEU_HUMAN,sp|P08582|TRFM_HUMAN,sp|O15296|LX15B_HUMAN,sp|P0C869|PA24B_HUMAN,sp|O75787|RENR_HUMAN,sp|P02671|FIBA_HUMAN,sp|P04406|G3P_HUMAN,sp|P00738|HPT_HUMAN,sp|Q08380|LG3BP_HUMAN,sp|P19012|K1C15_HUMAN,sp|P81605|DCD_HUMAN,sp|P62834|RAP1A_HUMAN,sp|P10909|CLUS_HUMAN,sp|Q9UEU0|VTI1B_HUMAN,sp|O75531|BAF_HUMAN,sp|Q16610|ECM1_HUMA…
cellular_component	specific granule lumen	3	0.253767	sp|P00738|HPT_HUMAN,sp|Q9NQR4|NIT2_HUMAN,sp|P02763|A1AG1_HUMAN
cellular_component	intracellular organelle part	69	0.258718	sp|P33764|S10A3_HUMAN,sp|O75874|IDHC_HUMAN,sp|P35052|GPC1_HUMAN,sp|P30740|ILEU_HUMAN,sp|P08582|TRFM_HUMAN,sp|P0C869|PA24B_HUMAN,sp|O75787|RENR_HUMAN,sp|P02671|FIBA_HUMAN,sp|P02545|LMNA_HUMAN,sp|Q9NTM9|CUTC_HUMAN,sp|P04406|G3P_HUMAN,sp|P00738|HPT_HUMAN,sp|Q08380|LG3BP_HUMAN,sp|P19012|K1C15_HUMAN,sp|P62834|RAP1A_HUMAN,sp|Q9UEU0|VTI1B_HUMAN,sp|O75531|BAF_HUMAN,sp|Q16610|ECM1_HUMAN,sp|P00450|CERU_HUM…
cellular_component	microtubule organizing center	4	0.266311	sp|Q15018|ABRX2_HUMAN,sp|Q9NQR4|NIT2_HUMAN,sp|P50990|TCPQ_HUMAN,sp|P60953|CDC42_HUMAN
cellular_component	myelin sheath	7	0.269139	sp|P07355|ANXA2_HUMAN,sp|P00918|CAH2_HUMAN,sp|P07195|LDHB_HUMAN,sp|P62834|RAP1A_HUMAN,sp|P55072|TERA_HUMAN,sp|P40926|MDHM_HUMAN,sp|P60953|CDC42_HUMAN
cellular_component	receptor complex	2	0.272972	sp|P35579|MYH9_HUMAN,sp|P61769|B2MG_HUMAN
cellular_component	organelle part	69	0.293172	sp|P33764|S10A3_HUMAN,sp|O75874|IDHC_HUMAN,sp|P35052|GPC1_HUMAN,sp|P30740|ILEU_HUMAN,sp|P08582|TRFM_HUMAN,sp|P0C869|PA24B_HUMAN,sp|O75787|RENR_HUMAN,sp|P02671|FIBA_HUMAN,sp|P02545|LMNA_HUMAN,sp|Q9NTM9|CUTC_HUMAN,sp|P04406|G3P_HUMAN,sp|P00738|HPT_HUMAN,sp|Q08380|LG3BP_HUMAN,sp|P19012|K1C15_HUMAN,sp|P62834|RAP1A_HUMAN,sp|Q9UEU0|VTI1B_HUMAN,sp|O75531|BAF_HUMAN,sp|Q16610|ECM1_HUMAN,sp|P00450|CERU_HUM…
cellular_component	cell leading edge	5	0.299868	sp|P35579|MYH9_HUMAN,sp|P07355|ANXA2_HUMAN,sp|Q14118|DAG1_HUMAN,sp|P50552|VASP_HUMAN,sp|P60953|CDC42_HUMAN
cellular_component	filopodium	2	0.301021	sp|Q14118|DAG1_HUMAN,sp|P50552|VASP_HUMAN
cellular_component	intermediate filament cytoskeleton	7	0.305164	sp|Q9NSB4|KRT82_HUMAN,sp|P19012|K1C15_HUMAN,sp|P50990|TCPQ_HUMAN,sp|Q92764|KRT35_HUMAN,sp|Q14CN4|K2C72_HUMAN,sp|Q6A163|K1C39_HUMAN,sp|P02545|LMNA_HUMAN
cellular_component	cytoplasmic part	80	0.324764	sp|P01040|CYTA_HUMAN,sp|P33764|S10A3_HUMAN,sp|O75874|IDHC_HUMAN,sp|P35052|GPC1_HUMAN,sp|P30740|ILEU_HUMAN,sp|P08582|TRFM_HUMAN,sp|O15296|LX15B_HUMAN,sp|P0C869|PA24B_HUMAN,sp|O75787|RENR_HUMAN,sp|P02671|FIBA_HUMAN,sp|P02545|LMNA_HUMAN,sp|Q9NTM9|CUTC_HUMAN,sp|P04406|G3P_HUMAN,sp|P00738|HPT_HUMAN,sp|Q08380|LG3BP_HUMAN,sp|P19012|K1C15_HUMAN,sp|P62834|RAP1A_HUMAN,sp|P10909|CLUS_HUMAN,sp|P12081|SYHC_HU…
cellular_component	intracellular organelle	79	0.326354	sp|P33764|S10A3_HUMAN,sp|O75874|IDHC_HUMAN,sp|P35052|GPC1_HUMAN,sp|P30740|ILEU_HUMAN,sp|P08582|TRFM_HUMAN,sp|O15296|LX15B_HUMAN,sp|P0C869|PA24B_HUMAN,sp|O75787|RENR_HUMAN,sp|P02671|FIBA_HUMAN,sp|P02545|LMNA_HUMAN,sp|Q9NTM9|CUTC_HUMAN,sp|P04406|G3P_HUMAN,sp|P00738|HPT_HUMAN,sp|Q08380|LG3BP_HUMAN,sp|P19012|K1C15_HUMAN,sp|P62834|RAP1A_HUMAN,sp|P10909|CLUS_HUMAN,sp|P12081|SYHC_HUMAN,sp|Q9UEU0|VTI1B_H…
cellular_component	mitochondrial inner membrane	4	0.334528	sp|P43304|GPDM_HUMAN,sp|P0C869|PA24B_HUMAN,sp|O95831|AIFM1_HUMAN,sp|P40926|MDHM_HUMAN
cellular_component	membrane raft	4	0.334528	sp|P07355|ANXA2_HUMAN,sp|Q14118|DAG1_HUMAN,sp|P35052|GPC1_HUMAN,sp|P07195|LDHB_HUMAN
cellular_component	membrane microdomain	4	0.334528	sp|P07355|ANXA2_HUMAN,sp|Q14118|DAG1_HUMAN,sp|P35052|GPC1_HUMAN,sp|P07195|LDHB_HUMAN
cellular_component	actin-based cell projection	3	0.336364	sp|Q14118|DAG1_HUMAN,sp|P00918|CAH2_HUMAN,sp|P50552|VASP_HUMAN
cellular_component	cytosol	50	0.346991	sp|Q15018|ABRX2_HUMAN,sp|Q99436|PSB7_HUMAN,sp|P01040|CYTA_HUMAN,sp|P33764|S10A3_HUMAN,sp|P07355|ANXA2_HUMAN,sp|O75874|IDHC_HUMAN,sp|P35052|GPC1_HUMAN,sp|P07195|LDHB_HUMAN,sp|O15296|LX15B_HUMAN,sp|P35579|MYH9_HUMAN,sp|P02652|APOA2_HUMAN,sp|P0C869|PA24B_HUMAN,sp|P02545|LMNA_HUMAN,sp|P04406|G3P_HUMAN,sp|Q9NTM9|CUTC_HUMAN,sp|P19012|K1C15_HUMAN,sp|P06737|PYGL_HUMAN,sp|P62834|RAP1A_HUMAN,sp|P68871|HBB_…
cellular_component	mitochondrial membrane	5	0.359957	sp|P43304|GPDM_HUMAN,sp|Q99536|VAT1_HUMAN,sp|P0C869|PA24B_HUMAN,sp|O95831|AIFM1_HUMAN,sp|P40926|MDHM_HUMAN
cellular_component	membrane region	5	0.359957	sp|P07355|ANXA2_HUMAN,sp|Q14118|DAG1_HUMAN,sp|P35052|GPC1_HUMAN,sp|P07195|LDHB_HUMAN,sp|Q96CW1|AP2M1_HUMAN
cellular_component	late endosome	4	0.369096	sp|P07355|ANXA2_HUMAN,sp|Q9UEU0|VTI1B_HUMAN,sp|P01034|CYTC_HUMAN,sp|P62834|RAP1A_HUMAN
cellular_component	proteasome core complex	2	0.38366	sp|Q99436|PSB7_HUMAN,sp|P28066|PSA5_HUMAN
cellular_component	leading edge membrane	2	0.38366	sp|P50552|VASP_HUMAN,sp|P60953|CDC42_HUMAN
cellular_component	sarcolemma	2	0.38366	sp|P07355|ANXA2_HUMAN,sp|Q14118|DAG1_HUMAN
cellular_component	synaptic membrane	2	0.38366	sp|Q14118|DAG1_HUMAN,sp|P16870|CBPE_HUMAN
cellular_component	intermediate filament	6	0.391937	sp|Q9NSB4|KRT82_HUMAN,sp|P19012|K1C15_HUMAN,sp|Q92764|KRT35_HUMAN,sp|Q14CN4|K2C72_HUMAN,sp|Q6A163|K1C39_HUMAN,sp|P02545|LMNA_HUMAN
cellular_component	proteasome complex	3	0.398346	sp|Q99436|PSB7_HUMAN,sp|P28066|PSA5_HUMAN,sp|P55072|TERA_HUMAN
cellular_component	azurophil granule lumen	5	0.405425	sp|P07355|ANXA2_HUMAN,sp|P01011|AACT_HUMAN,sp|Q99536|VAT1_HUMAN,sp|P55072|TERA_HUMAN,sp|P50990|TCPQ_HUMAN
cellular_component	cytoplasmic ribonucleoprotein granule	2	0.410351	sp|Q9UL18|AGO1_HUMAN,sp|P60953|CDC42_HUMAN
cellular_component	ficolin-1-rich granule membrane	2	0.410351	sp|O75787|RENR_HUMAN,sp|P35237|SPB6_HUMAN
cellular_component	cytosolic part	3	0.41872	sp|P50990|TCPQ_HUMAN,sp|P68871|HBB_HUMAN,sp|P69905|HBA_HUMAN
cellular_component	apical part of cell	3	0.41872	sp|P00918|CAH2_HUMAN,sp|P12273|PIP_HUMAN,sp|P60953|CDC42_HUMAN
cellular_component	endopeptidase complex	3	0.41872	sp|Q99436|PSB7_HUMAN,sp|P28066|PSA5_HUMAN,sp|P55072|TERA_HUMAN
cellular_component	adherens junction	8	0.427262	sp|P35579|MYH9_HUMAN,sp|Q14118|DAG1_HUMAN,sp|P61769|B2MG_HUMAN,sp|O00161|SNP23_HUMAN,sp|P50552|VASP_HUMAN,sp|P07355|ANXA2_HUMAN,sp|Q9UL25|RAB21_HUMAN,sp|P60953|CDC42_HUMAN
cellular_component	ribonucleoprotein granule	2	0.436478	sp|Q9UL18|AGO1_HUMAN,sp|P60953|CDC42_HUMAN
cellular_component	endosome	9	0.446498	sp|Q9UEU0|VTI1B_HUMAN,sp|P02652|APOA2_HUMAN,sp|P01034|CYTC_HUMAN,sp|P0C869|PA24B_HUMAN,sp|Q96CW1|AP2M1_HUMAN,sp|P07355|ANXA2_HUMAN,sp|P35052|GPC1_HUMAN,sp|Q9UL25|RAB21_HUMAN,sp|P62834|RAP1A_HUMAN
cellular_component	nucleoplasm	16	0.446531	sp|Q99436|PSB7_HUMAN,sp|O75531|BAF_HUMAN,sp|O00161|SNP23_HUMAN,sp|Q9HB07|MYG1_HUMAN,sp|P46736|BRCC3_HUMAN,sp|P28066|PSA5_HUMAN,sp|P35052|GPC1_HUMAN,sp|P55072|TERA_HUMAN,sp|P50990|TCPQ_HUMAN,sp|Q9UL18|AGO1_HUMAN,sp|Q14118|DAG1_HUMAN,sp|Q719H9|KCTD1_HUMAN,sp|Q2TAY7|SMU1_HUMAN,sp|P02545|LMNA_HUMAN,sp|Q9NTM9|CUTC_HUMAN,sp|Q9H190|SDCB2_HUMAN
cellular_component	synapse	6	0.446574	sp|P35579|MYH9_HUMAN,sp|Q9UEU0|VTI1B_HUMAN,sp|Q14118|DAG1_HUMAN,sp|P16870|CBPE_HUMAN,sp|Q96CW1|AP2M1_HUMAN,sp|O00161|SNP23_HUMAN
cellular_component	mitochondrial envelope	5	0.450569	sp|P43304|GPDM_HUMAN,sp|Q99536|VAT1_HUMAN,sp|P0C869|PA24B_HUMAN,sp|O95831|AIFM1_HUMAN,sp|P40926|MDHM_HUMAN
cellular_component	organelle envelope	9	0.457552	sp|P01034|CYTC_HUMAN,sp|O75531|BAF_HUMAN,sp|P43304|GPDM_HUMAN,sp|P0C869|PA24B_HUMAN,sp|P40926|MDHM_HUMAN,sp|P02545|LMNA_HUMAN,sp|P04406|G3P_HUMAN,sp|Q99536|VAT1_HUMAN,sp|O95831|AIFM1_HUMAN
cellular_component	envelope	9	0.457552	sp|P01034|CYTC_HUMAN,sp|O75531|BAF_HUMAN,sp|P43304|GPDM_HUMAN,sp|P0C869|PA24B_HUMAN,sp|P40926|MDHM_HUMAN,sp|P02545|LMNA_HUMAN,sp|P04406|G3P_HUMAN,sp|Q99536|VAT1_HUMAN,sp|O95831|AIFM1_HUMAN
cellular_component	microtubule	3	0.458771	sp|Q15018|ABRX2_HUMAN,sp|P50990|TCPQ_HUMAN,sp|Q9HC35|EMAL4_HUMAN
cellular_component	non-membrane-bounded organelle	26	0.460023	sp|Q15018|ABRX2_HUMAN,sp|O75531|BAF_HUMAN,sp|Q9NQR4|NIT2_HUMAN,sp|P33764|S10A3_HUMAN,sp|P50552|VASP_HUMAN,sp|P07355|ANXA2_HUMAN,sp|P46736|BRCC3_HUMAN,sp|Q9NSB4|KRT82_HUMAN,sp|P55072|TERA_HUMAN,sp|P50990|TCPQ_HUMAN,sp|Q92764|KRT35_HUMAN,sp|Q6A163|K1C39_HUMAN,sp|P60953|CDC42_HUMAN,sp|O15296|LX15B_HUMAN,sp|Q9UL18|AGO1_HUMAN,sp|P35579|MYH9_HUMAN,sp|Q14118|DAG1_HUMAN,sp|P01034|CYTC_HUMAN,sp|P02545|LMN…
cellular_component	intracellular non-membrane-bounded organelle	26	0.460023	sp|Q15018|ABRX2_HUMAN,sp|O75531|BAF_HUMAN,sp|Q9NQR4|NIT2_HUMAN,sp|P33764|S10A3_HUMAN,sp|P50552|VASP_HUMAN,sp|P07355|ANXA2_HUMAN,sp|P46736|BRCC3_HUMAN,sp|Q9NSB4|KRT82_HUMAN,sp|P55072|TERA_HUMAN,sp|P50990|TCPQ_HUMAN,sp|Q92764|KRT35_HUMAN,sp|Q6A163|K1C39_HUMAN,sp|P60953|CDC42_HUMAN,sp|O15296|LX15B_HUMAN,sp|Q9UL18|AGO1_HUMAN,sp|P35579|MYH9_HUMAN,sp|Q14118|DAG1_HUMAN,sp|P01034|CYTC_HUMAN,sp|P02545|LMN…
cellular_component	organelle	86	0.468545	sp|P01040|CYTA_HUMAN,sp|P33764|S10A3_HUMAN,sp|O75874|IDHC_HUMAN,sp|P35052|GPC1_HUMAN,sp|P30740|ILEU_HUMAN,sp|P08582|TRFM_HUMAN,sp|O15296|LX15B_HUMAN,sp|P0C869|PA24B_HUMAN,sp|O75787|RENR_HUMAN,sp|P02671|FIBA_HUMAN,sp|P02545|LMNA_HUMAN,sp|Q9NTM9|CUTC_HUMAN,sp|P04406|G3P_HUMAN,sp|P00738|HPT_HUMAN,sp|Q08380|LG3BP_HUMAN,sp|P19012|K1C15_HUMAN,sp|P81605|DCD_HUMAN,sp|P62834|RAP1A_HUMAN,sp|P10909|CLUS_HUM…
cellular_component	supramolecular polymer	11	0.468733	sp|Q14118|DAG1_HUMAN,sp|P01034|CYTC_HUMAN,sp|Q15018|ABRX2_HUMAN,sp|P02545|LMNA_HUMAN,sp|P19012|K1C15_HUMAN,sp|Q9NSB4|KRT82_HUMAN,sp|Q92764|KRT35_HUMAN,sp|P50990|TCPQ_HUMAN,sp|Q14CN4|K2C72_HUMAN,sp|Q6A163|K1C39_HUMAN,sp|Q9HC35|EMAL4_HUMAN
cellular_component	supramolecular fiber	11	0.468733	sp|Q14118|DAG1_HUMAN,sp|P01034|CYTC_HUMAN,sp|Q15018|ABRX2_HUMAN,sp|P02545|LMNA_HUMAN,sp|P19012|K1C15_HUMAN,sp|Q9NSB4|KRT82_HUMAN,sp|Q92764|KRT35_HUMAN,sp|P50990|TCPQ_HUMAN,sp|Q14CN4|K2C72_HUMAN,sp|Q6A163|K1C39_HUMAN,sp|Q9HC35|EMAL4_HUMAN
cellular_component	presynapse	3	0.478374	sp|Q9UEU0|VTI1B_HUMAN,sp|Q96CW1|AP2M1_HUMAN,sp|O00161|SNP23_HUMAN
cellular_component	peptidase complex	3	0.478374	sp|Q99436|PSB7_HUMAN,sp|P28066|PSA5_HUMAN,sp|P55072|TERA_HUMAN
cellular_component	supramolecular complex	11	0.478735	sp|Q14118|DAG1_HUMAN,sp|P01034|CYTC_HUMAN,sp|Q15018|ABRX2_HUMAN,sp|P02545|LMNA_HUMAN,sp|P19012|K1C15_HUMAN,sp|Q9NSB4|KRT82_HUMAN,sp|Q92764|KRT35_HUMAN,sp|P50990|TCPQ_HUMAN,sp|Q14CN4|K2C72_HUMAN,sp|Q6A163|K1C39_HUMAN,sp|Q9HC35|EMAL4_HUMAN
cellular_component	organelle inner membrane	4	0.487993	sp|P43304|GPDM_HUMAN,sp|P0C869|PA24B_HUMAN,sp|O95831|AIFM1_HUMAN,sp|P40926|MDHM_HUMAN
cellular_component	nuclear membrane	3	0.497652	sp|P04406|G3P_HUMAN,sp|P01034|CYTC_HUMAN,sp|P02545|LMNA_HUMAN
cellular_component	cell body	5	0.509354	sp|Q9UEU0|VTI1B_HUMAN,sp|P01034|CYTC_HUMAN,sp|P16870|CBPE_HUMAN,sp|O75787|RENR_HUMAN,sp|P50990|TCPQ_HUMAN
cellular_component	synapse part	5	0.509354	sp|Q9UEU0|VTI1B_HUMAN,sp|Q14118|DAG1_HUMAN,sp|P16870|CBPE_HUMAN,sp|Q96CW1|AP2M1_HUMAN,sp|O00161|SNP23_HUMAN
cellular_component	cytoplasm	83	0.511291	sp|P01040|CYTA_HUMAN,sp|P33764|S10A3_HUMAN,sp|O75874|IDHC_HUMAN,sp|P35052|GPC1_HUMAN,sp|P30740|ILEU_HUMAN,sp|P08582|TRFM_HUMAN,sp|O15296|LX15B_HUMAN,sp|P0C869|PA24B_HUMAN,sp|O75787|RENR_HUMAN,sp|P02671|FIBA_HUMAN,sp|P02545|LMNA_HUMAN,sp|Q9NTM9|CUTC_HUMAN,sp|P04406|G3P_HUMAN,sp|P00738|HPT_HUMAN,sp|Q08380|LG3BP_HUMAN,sp|P19012|K1C15_HUMAN,sp|P62834|RAP1A_HUMAN,sp|P10909|CLUS_HUMAN,sp|P12081|SYHC_HU…
cellular_component	plasma membrane	29	0.516616	sp|P61769|B2MG_HUMAN,sp|P02679|FIBG_HUMAN,sp|O00161|SNP23_HUMAN,sp|P01040|CYTA_HUMAN,sp|P50552|VASP_HUMAN,sp|P12273|PIP_HUMAN,sp|P07355|ANXA2_HUMAN,sp|P35052|GPC1_HUMAN,sp|P16870|CBPE_HUMAN,sp|P08582|TRFM_HUMAN,sp|P60953|CDC42_HUMAN,sp|O15296|LX15B_HUMAN,sp|Q96DR8|MUCL1_HUMAN,sp|P35579|MYH9_HUMAN,sp|Q14118|DAG1_HUMAN,sp|P00918|CAH2_HUMAN,sp|O75326|SEM7A_HUMAN,sp|O75787|RENR_HUMAN,sp|P01008|ANT3_H…
cellular_component	membrane-bounded organelle	83	0.521265	sp|P01040|CYTA_HUMAN,sp|P33764|S10A3_HUMAN,sp|O75874|IDHC_HUMAN,sp|P35052|GPC1_HUMAN,sp|P30740|ILEU_HUMAN,sp|P08582|TRFM_HUMAN,sp|O15296|LX15B_HUMAN,sp|P0C869|PA24B_HUMAN,sp|O75787|RENR_HUMAN,sp|P02671|FIBA_HUMAN,sp|P02545|LMNA_HUMAN,sp|Q9NTM9|CUTC_HUMAN,sp|P04406|G3P_HUMAN,sp|P00738|HPT_HUMAN,sp|Q08380|LG3BP_HUMAN,sp|P19012|K1C15_HUMAN,sp|P81605|DCD_HUMAN,sp|P62834|RAP1A_HUMAN,sp|P10909|CLUS_HUM…
cellular_component	polymeric cytoskeletal fiber	9	0.523014	sp|Q15018|ABRX2_HUMAN,sp|P02545|LMNA_HUMAN,sp|P19012|K1C15_HUMAN,sp|Q9NSB4|KRT82_HUMAN,sp|Q92764|KRT35_HUMAN,sp|P50990|TCPQ_HUMAN,sp|Q14CN4|K2C72_HUMAN,sp|Q9HC35|EMAL4_HUMAN,sp|Q6A163|K1C39_HUMAN
cellular_component	secretory granule membrane	5	0.523689	sp|P16870|CBPE_HUMAN,sp|O75787|RENR_HUMAN,sp|P62834|RAP1A_HUMAN,sp|O00161|SNP23_HUMAN,sp|P35237|SPB6_HUMAN
cellular_component	cytoskeleton	17	0.525059	sp|Q15018|ABRX2_HUMAN,sp|Q9NQR4|NIT2_HUMAN,sp|P50552|VASP_HUMAN,sp|P46736|BRCC3_HUMAN,sp|Q9NSB4|KRT82_HUMAN,sp|P50990|TCPQ_HUMAN,sp|Q92764|KRT35_HUMAN,sp|Q6A163|K1C39_HUMAN,sp|O15296|LX15B_HUMAN,sp|P60953|CDC42_HUMAN,sp|P35579|MYH9_HUMAN,sp|Q14118|DAG1_HUMAN,sp|P02545|LMNA_HUMAN,sp|P04406|G3P_HUMAN,sp|P19012|K1C15_HUMAN,sp|Q14CN4|K2C72_HUMAN,sp|Q9HC35|EMAL4_HUMAN
cellular_component	anchoring junction	8	0.531455	sp|P35579|MYH9_HUMAN,sp|Q14118|DAG1_HUMAN,sp|P61769|B2MG_HUMAN,sp|O00161|SNP23_HUMAN,sp|P50552|VASP_HUMAN,sp|P07355|ANXA2_HUMAN,sp|Q9UL25|RAB21_HUMAN,sp|P60953|CDC42_HUMAN
cellular_component	late endosome membrane	2	0.534311	sp|P07355|ANXA2_HUMAN,sp|Q9UEU0|VTI1B_HUMAN
cellular_component	nuclear body	3	0.535128	sp|Q9H190|SDCB2_HUMAN,sp|Q2TAY7|SMU1_HUMAN,sp|P02545|LMNA_HUMAN
cellular_component	cell periphery	30	0.539076	sp|P61769|B2MG_HUMAN,sp|P02679|FIBG_HUMAN,sp|O00161|SNP23_HUMAN,sp|P01040|CYTA_HUMAN,sp|P50552|VASP_HUMAN,sp|P12273|PIP_HUMAN,sp|P07355|ANXA2_HUMAN,sp|P35052|GPC1_HUMAN,sp|P16870|CBPE_HUMAN,sp|P08582|TRFM_HUMAN,sp|P60953|CDC42_HUMAN,sp|O15296|LX15B_HUMAN,sp|Q96DR8|MUCL1_HUMAN,sp|P35579|MYH9_HUMAN,sp|Q14118|DAG1_HUMAN,sp|P00918|CAH2_HUMAN,sp|O75326|SEM7A_HUMAN,sp|O75787|RENR_HUMAN,sp|P01008|ANT3_H…
cellular_component	vacuolar lumen	7	0.541042	sp|P07355|ANXA2_HUMAN,sp|P01011|AACT_HUMAN,sp|Q99536|VAT1_HUMAN,sp|P35052|GPC1_HUMAN,sp|P55072|TERA_HUMAN,sp|P50990|TCPQ_HUMAN,sp|P02774|VTDB_HUMAN
cellular_component	mitochondrion	14	0.561187	sp|P49590|SYHM_HUMAN,sp|P43304|GPDM_HUMAN,sp|P0C869|PA24B_HUMAN,sp|Q9NQR4|NIT2_HUMAN,sp|P61604|CH10_HUMAN,sp|Q96CW1|AP2M1_HUMAN,sp|P40926|MDHM_HUMAN,sp|Q9HB07|MYG1_HUMAN,sp|O75874|IDHC_HUMAN,sp|Q99536|VAT1_HUMAN,sp|P07195|LDHB_HUMAN,sp|O95831|AIFM1_HUMAN,sp|P12081|SYHC_HUMAN,sp|P10909|CLUS_HUMAN
cellular_component	mitochondrial part	7	0.564632	sp|P49590|SYHM_HUMAN,sp|P43304|GPDM_HUMAN,sp|Q99536|VAT1_HUMAN,sp|P0C869|PA24B_HUMAN,sp|O95831|AIFM1_HUMAN,sp|P61604|CH10_HUMAN,sp|P40926|MDHM_HUMAN
cellular_component	cell-substrate adherens junction	6	0.564816	sp|P35579|MYH9_HUMAN,sp|Q14118|DAG1_HUMAN,sp|P61769|B2MG_HUMAN,sp|Q9UL25|RAB21_HUMAN,sp|O00161|SNP23_HUMAN,sp|P50552|VASP_HUMAN
cellular_component	focal adhesion	6	0.564816	sp|P35579|MYH9_HUMAN,sp|Q14118|DAG1_HUMAN,sp|P61769|B2MG_HUMAN,sp|Q9UL25|RAB21_HUMAN,sp|O00161|SNP23_HUMAN,sp|P50552|VASP_HUMAN
cellular_component	nuclear envelope	4	0.567382	sp|P04406|G3P_HUMAN,sp|P01034|CYTC_HUMAN,sp|O75531|BAF_HUMAN,sp|P02545|LMNA_HUMAN
cellular_component	phagocytic vesicle	2	0.578766	sp|P62834|RAP1A_HUMAN,sp|O00161|SNP23_HUMAN
cellular_component	protein complex	23	0.581374	sp|Q9UEU0|VTI1B_HUMAN,sp|P61769|B2MG_HUMAN,sp|Q15018|ABRX2_HUMAN,sp|Q99436|PSB7_HUMAN,sp|P02679|FIBG_HUMAN,sp|O00161|SNP23_HUMAN,sp|P07355|ANXA2_HUMAN,sp|P46736|BRCC3_HUMAN,sp|P28066|PSA5_HUMAN,sp|P55072|TERA_HUMAN,sp|P50990|TCPQ_HUMAN,sp|P35579|MYH9_HUMAN,sp|Q14118|DAG1_HUMAN,sp|Q96CW1|AP2M1_HUMAN,sp|P02671|FIBA_HUMAN,sp|P00738|HPT_HUMAN,sp|P04406|G3P_HUMAN,sp|P02675|FIBB_HUMAN,sp|P62834|RAP1A_H…
cellular_component	cytoskeletal part	13	0.586273	sp|P35579|MYH9_HUMAN,sp|Q15018|ABRX2_HUMAN,sp|Q9NQR4|NIT2_HUMAN,sp|P02545|LMNA_HUMAN,sp|P46736|BRCC3_HUMAN,sp|P19012|K1C15_HUMAN,sp|Q9NSB4|KRT82_HUMAN,sp|P50990|TCPQ_HUMAN,sp|Q92764|KRT35_HUMAN,sp|Q14CN4|K2C72_HUMAN,sp|Q6A163|K1C39_HUMAN,sp|P60953|CDC42_HUMAN,sp|Q9HC35|EMAL4_HUMAN
cellular_component	cell-substrate junction	6	0.589558	sp|P35579|MYH9_HUMAN,sp|Q14118|DAG1_HUMAN,sp|P61769|B2MG_HUMAN,sp|Q9UL25|RAB21_HUMAN,sp|O00161|SNP23_HUMAN,sp|P50552|VASP_HUMAN
cellular_component	cell	89	0.594575	sp|P01040|CYTA_HUMAN,sp|P33764|S10A3_HUMAN,sp|O75874|IDHC_HUMAN,sp|P35052|GPC1_HUMAN,sp|P30740|ILEU_HUMAN,sp|P08582|TRFM_HUMAN,sp|O15296|LX15B_HUMAN,sp|O75326|SEM7A_HUMAN,sp|P0C869|PA24B_HUMAN,sp|O75787|RENR_HUMAN,sp|P02671|FIBA_HUMAN,sp|P02545|LMNA_HUMAN,sp|Q9NTM9|CUTC_HUMAN,sp|P04406|G3P_HUMAN,sp|P00738|HPT_HUMAN,sp|P19012|K1C15_HUMAN,sp|Q08380|LG3BP_HUMAN,sp|P62834|RAP1A_HUMAN,sp|P10909|CLUS_H…
cellular_component	cell part	89	0.594575	sp|P01040|CYTA_HUMAN,sp|P33764|S10A3_HUMAN,sp|O75874|IDHC_HUMAN,sp|P35052|GPC1_HUMAN,sp|P30740|ILEU_HUMAN,sp|P08582|TRFM_HUMAN,sp|O15296|LX15B_HUMAN,sp|O75326|SEM7A_HUMAN,sp|P0C869|PA24B_HUMAN,sp|O75787|RENR_HUMAN,sp|P02671|FIBA_HUMAN,sp|P02545|LMNA_HUMAN,sp|Q9NTM9|CUTC_HUMAN,sp|P04406|G3P_HUMAN,sp|P00738|HPT_HUMAN,sp|P19012|K1C15_HUMAN,sp|Q08380|LG3BP_HUMAN,sp|P62834|RAP1A_HUMAN,sp|P10909|CLUS_H…
cellular_component	primary lysosome	6	0.601665	sp|P07355|ANXA2_HUMAN,sp|P01011|AACT_HUMAN,sp|Q99536|VAT1_HUMAN,sp|O00161|SNP23_HUMAN,sp|P55072|TERA_HUMAN,sp|P50990|TCPQ_HUMAN
cellular_component	azurophil granule	6	0.601665	sp|P07355|ANXA2_HUMAN,sp|P01011|AACT_HUMAN,sp|Q99536|VAT1_HUMAN,sp|O00161|SNP23_HUMAN,sp|P55072|TERA_HUMAN,sp|P50990|TCPQ_HUMAN
cellular_component	vacuole	15	0.603786	sp|Q3MJ16|PA24E_HUMAN,sp|Q9UEU0|VTI1B_HUMAN,sp|P01034|CYTC_HUMAN,sp|P01011|AACT_HUMAN,sp|P80108|PHLD_HUMAN,sp|P00450|CERU_HUMAN,sp|Q96CW1|AP2M1_HUMAN,sp|O00161|SNP23_HUMAN,sp|P02774|VTDB_HUMAN,sp|P07355|ANXA2_HUMAN,sp|P35052|GPC1_HUMAN,sp|Q99536|VAT1_HUMAN,sp|P55072|TERA_HUMAN,sp|P50990|TCPQ_HUMAN,sp|P60953|CDC42_HUMAN
cellular_component	integral component of plasma membrane	4	0.625885	sp|P35579|MYH9_HUMAN,sp|P35052|GPC1_HUMAN,sp|Q9UHW9|S12A6_HUMAN,sp|P08582|TRFM_HUMAN
cellular_component	whole membrane	17	0.627466	sp|Q9UEU0|VTI1B_HUMAN,sp|P80108|PHLD_HUMAN,sp|P00450|CERU_HUMAN,sp|O00161|SNP23_HUMAN,sp|P07355|ANXA2_HUMAN,sp|P35052|GPC1_HUMAN,sp|Q99536|VAT1_HUMAN,sp|P16870|CBPE_HUMAN,sp|P07195|LDHB_HUMAN,sp|Q3MJ16|PA24E_HUMAN,sp|Q14118|DAG1_HUMAN,sp|P0C869|PA24B_HUMAN,sp|O75787|RENR_HUMAN,sp|Q96CW1|AP2M1_HUMAN,sp|Q9UL25|RAB21_HUMAN,sp|P62834|RAP1A_HUMAN,sp|P35237|SPB6_HUMAN
cellular_component	endosome membrane	5	0.631167	sp|P07355|ANXA2_HUMAN,sp|Q9UEU0|VTI1B_HUMAN,sp|Q9UL25|RAB21_HUMAN,sp|P0C869|PA24B_HUMAN,sp|Q96CW1|AP2M1_HUMAN
cellular_component	transport vesicle membrane	2	0.639565	sp|Q9UEU0|VTI1B_HUMAN,sp|P16870|CBPE_HUMAN
cellular_component	cell projection membrane	2	0.639565	sp|P50552|VASP_HUMAN,sp|P60953|CDC42_HUMAN
cellular_component	contractile fiber	2	0.639565	sp|Q14118|DAG1_HUMAN,sp|P01034|CYTC_HUMAN
cellular_component	nuclear part	21	0.642506	sp|Q15018|ABRX2_HUMAN,sp|Q99436|PSB7_HUMAN,sp|O75531|BAF_HUMAN,sp|O00161|SNP23_HUMAN,sp|P33764|S10A3_HUMAN,sp|Q9HB07|MYG1_HUMAN,sp|P28066|PSA5_HUMAN,sp|P46736|BRCC3_HUMAN,sp|P35052|GPC1_HUMAN,sp|P55072|TERA_HUMAN,sp|P50990|TCPQ_HUMAN,sp|Q9UL18|AGO1_HUMAN,sp|P35579|MYH9_HUMAN,sp|Q14118|DAG1_HUMAN,sp|P01034|CYTC_HUMAN,sp|Q2TAY7|SMU1_HUMAN,sp|Q719H9|KCTD1_HUMAN,sp|P02545|LMNA_HUMAN,sp|P04406|G3P_HUM…
cellular_component	lytic vacuole	14	0.652106	sp|Q3MJ16|PA24E_HUMAN,sp|Q9UEU0|VTI1B_HUMAN,sp|P01034|CYTC_HUMAN,sp|P01011|AACT_HUMAN,sp|P80108|PHLD_HUMAN,sp|P00450|CERU_HUMAN,sp|Q96CW1|AP2M1_HUMAN,sp|O00161|SNP23_HUMAN,sp|P02774|VTDB_HUMAN,sp|P07355|ANXA2_HUMAN,sp|P35052|GPC1_HUMAN,sp|Q99536|VAT1_HUMAN,sp|P55072|TERA_HUMAN,sp|P50990|TCPQ_HUMAN
cellular_component	lysosome	14	0.652106	sp|Q3MJ16|PA24E_HUMAN,sp|Q9UEU0|VTI1B_HUMAN,sp|P01034|CYTC_HUMAN,sp|P01011|AACT_HUMAN,sp|P80108|PHLD_HUMAN,sp|P00450|CERU_HUMAN,sp|Q96CW1|AP2M1_HUMAN,sp|O00161|SNP23_HUMAN,sp|P02774|VTDB_HUMAN,sp|P07355|ANXA2_HUMAN,sp|P35052|GPC1_HUMAN,sp|Q99536|VAT1_HUMAN,sp|P55072|TERA_HUMAN,sp|P50990|TCPQ_HUMAN
cellular_component	membrane protein complex	7	0.653159	sp|P35579|MYH9_HUMAN,sp|Q9UEU0|VTI1B_HUMAN,sp|Q14118|DAG1_HUMAN,sp|P61769|B2MG_HUMAN,sp|Q96CW1|AP2M1_HUMAN,sp|O00161|SNP23_HUMAN,sp|P55072|TERA_HUMAN
cellular_component	intracellular	86	0.654767	sp|P01040|CYTA_HUMAN,sp|P33764|S10A3_HUMAN,sp|O75874|IDHC_HUMAN,sp|P35052|GPC1_HUMAN,sp|P30740|ILEU_HUMAN,sp|P08582|TRFM_HUMAN,sp|O15296|LX15B_HUMAN,sp|P0C869|PA24B_HUMAN,sp|O75787|RENR_HUMAN,sp|P02671|FIBA_HUMAN,sp|P02545|LMNA_HUMAN,sp|Q9NTM9|CUTC_HUMAN,sp|P04406|G3P_HUMAN,sp|P00738|HPT_HUMAN,sp|Q08380|LG3BP_HUMAN,sp|P19012|K1C15_HUMAN,sp|P62834|RAP1A_HUMAN,sp|P10909|CLUS_HUMAN,sp|P12081|SYHC_HU…
cellular_component	vacuolar part	12	0.663444	sp|Q3MJ16|PA24E_HUMAN,sp|Q9UEU0|VTI1B_HUMAN,sp|P01011|AACT_HUMAN,sp|P80108|PHLD_HUMAN,sp|P00450|CERU_HUMAN,sp|Q96CW1|AP2M1_HUMAN,sp|P02774|VTDB_HUMAN,sp|P07355|ANXA2_HUMAN,sp|P35052|GPC1_HUMAN,sp|Q99536|VAT1_HUMAN,sp|P55072|TERA_HUMAN,sp|P50990|TCPQ_HUMAN
cellular_component	macromolecular complex	29	0.666464	sp|Q9UEU0|VTI1B_HUMAN,sp|P61769|B2MG_HUMAN,sp|Q15018|ABRX2_HUMAN,sp|Q99436|PSB7_HUMAN,sp|P43304|GPDM_HUMAN,sp|P02679|FIBG_HUMAN,sp|O00161|SNP23_HUMAN,sp|P02647|APOA1_HUMAN,sp|P07355|ANXA2_HUMAN,sp|P46736|BRCC3_HUMAN,sp|P28066|PSA5_HUMAN,sp|P55072|TERA_HUMAN,sp|P50990|TCPQ_HUMAN,sp|P60953|CDC42_HUMAN,sp|Q9UL18|AGO1_HUMAN,sp|P35579|MYH9_HUMAN,sp|Q14118|DAG1_HUMAN,sp|P02652|APOA2_HUMAN,sp|Q2TAY7|SMU…
cellular_component	intrinsic component of plasma membrane	4	0.679254	sp|P35579|MYH9_HUMAN,sp|P35052|GPC1_HUMAN,sp|Q9UHW9|S12A6_HUMAN,sp|P08582|TRFM_HUMAN
cellular_component	lysosomal membrane	6	0.68088	sp|P07355|ANXA2_HUMAN,sp|Q3MJ16|PA24E_HUMAN,sp|Q9UEU0|VTI1B_HUMAN,sp|P80108|PHLD_HUMAN,sp|P00450|CERU_HUMAN,sp|Q96CW1|AP2M1_HUMAN
cellular_component	lytic vacuole membrane	6	0.68088	sp|P07355|ANXA2_HUMAN,sp|Q3MJ16|PA24E_HUMAN,sp|Q9UEU0|VTI1B_HUMAN,sp|P80108|PHLD_HUMAN,sp|P00450|CERU_HUMAN,sp|Q96CW1|AP2M1_HUMAN
cellular_component	nucleoplasm part	3	0.6826	sp|Q9H190|SDCB2_HUMAN,sp|Q2TAY7|SMU1_HUMAN,sp|P02545|LMNA_HUMAN
cellular_component	endoplasmic reticulum part	14	0.682764	sp|Q9UEU0|VTI1B_HUMAN,sp|Q14118|DAG1_HUMAN,sp|P02652|APOA2_HUMAN,sp|P01034|CYTC_HUMAN,sp|P02679|FIBG_HUMAN,sp|P01008|ANT3_HUMAN,sp|P00450|CERU_HUMAN,sp|A1L3X0|ELOV7_HUMAN,sp|P02671|FIBA_HUMAN,sp|Q9UL25|RAB21_HUMAN,sp|Q8IV08|PLD3_HUMAN,sp|P55072|TERA_HUMAN,sp|P08582|TRFM_HUMAN,sp|Q7Z2K6|ERMP1_HUMAN
cellular_component	intracellular ribonucleoprotein complex	5	0.690555	sp|Q9UL18|AGO1_HUMAN,sp|P04406|G3P_HUMAN,sp|Q2TAY7|SMU1_HUMAN,sp|P69905|HBA_HUMAN,sp|P60953|CDC42_HUMAN
cellular_component	endosomal part	5	0.690555	sp|P07355|ANXA2_HUMAN,sp|Q9UEU0|VTI1B_HUMAN,sp|Q9UL25|RAB21_HUMAN,sp|P0C869|PA24B_HUMAN,sp|Q96CW1|AP2M1_HUMAN
cellular_component	ribonucleoprotein complex	5	0.690555	sp|Q9UL18|AGO1_HUMAN,sp|P04406|G3P_HUMAN,sp|Q2TAY7|SMU1_HUMAN,sp|P69905|HBA_HUMAN,sp|P60953|CDC42_HUMAN
cellular_component	ruffle	2	0.693353	sp|P35579|MYH9_HUMAN,sp|P07355|ANXA2_HUMAN
cellular_component	neuronal cell body	3	0.710288	sp|Q9UEU0|VTI1B_HUMAN,sp|P01034|CYTC_HUMAN,sp|P16870|CBPE_HUMAN
cellular_component	nuclear lumen	17	0.719112	sp|Q99436|PSB7_HUMAN,sp|O75531|BAF_HUMAN,sp|O00161|SNP23_HUMAN,sp|P33764|S10A3_HUMAN,sp|Q9HB07|MYG1_HUMAN,sp|P46736|BRCC3_HUMAN,sp|P28066|PSA5_HUMAN,sp|P35052|GPC1_HUMAN,sp|P55072|TERA_HUMAN,sp|P50990|TCPQ_HUMAN,sp|Q9UL18|AGO1_HUMAN,sp|Q14118|DAG1_HUMAN,sp|Q719H9|KCTD1_HUMAN,sp|Q2TAY7|SMU1_HUMAN,sp|P02545|LMNA_HUMAN,sp|Q9NTM9|CUTC_HUMAN,sp|Q9H190|SDCB2_HUMAN
cellular_component	vacuolar membrane	6	0.721422	sp|P07355|ANXA2_HUMAN,sp|Q3MJ16|PA24E_HUMAN,sp|Q9UEU0|VTI1B_HUMAN,sp|P80108|PHLD_HUMAN,sp|P00450|CERU_HUMAN,sp|Q96CW1|AP2M1_HUMAN
cellular_component	extrinsic component of membrane	2	0.725458	sp|P07355|ANXA2_HUMAN,sp|O15296|LX15B_HUMAN
cellular_component	cell projection part	5	0.733269	sp|Q14118|DAG1_HUMAN,sp|Q9UL25|RAB21_HUMAN,sp|Q96CW1|AP2M1_HUMAN,sp|P50552|VASP_HUMAN,sp|P60953|CDC42_HUMAN
cellular_component	plasma membrane bounded cell projection part	5	0.733269	sp|Q14118|DAG1_HUMAN,sp|Q9UL25|RAB21_HUMAN,sp|Q96CW1|AP2M1_HUMAN,sp|P50552|VASP_HUMAN,sp|P60953|CDC42_HUMAN
cellular_component	endocytic vesicle membrane	2	0.740433	sp|Q96CW1|AP2M1_HUMAN,sp|O00161|SNP23_HUMAN
cellular_component	intracellular part	85	0.747437	sp|P01040|CYTA_HUMAN,sp|P33764|S10A3_HUMAN,sp|O75874|IDHC_HUMAN,sp|P35052|GPC1_HUMAN,sp|P30740|ILEU_HUMAN,sp|P08582|TRFM_HUMAN,sp|O15296|LX15B_HUMAN,sp|P0C869|PA24B_HUMAN,sp|O75787|RENR_HUMAN,sp|P02671|FIBA_HUMAN,sp|P02545|LMNA_HUMAN,sp|Q9NTM9|CUTC_HUMAN,sp|P04406|G3P_HUMAN,sp|P00738|HPT_HUMAN,sp|Q08380|LG3BP_HUMAN,sp|P19012|K1C15_HUMAN,sp|P62834|RAP1A_HUMAN,sp|P10909|CLUS_HUMAN,sp|P12081|SYHC_HU…
cellular_component	somatodendritic compartment	4	0.749142	sp|Q9UEU0|VTI1B_HUMAN,sp|P01034|CYTC_HUMAN,sp|P16870|CBPE_HUMAN,sp|P10909|CLUS_HUMAN
cellular_component	membrane	52	0.75309	sp|P80108|PHLD_HUMAN,sp|P01040|CYTA_HUMAN,sp|P12273|PIP_HUMAN,sp|P07355|ANXA2_HUMAN,sp|P35052|GPC1_HUMAN,sp|P07195|LDHB_HUMAN,sp|Q8IV08|PLD3_HUMAN,sp|P30740|ILEU_HUMAN,sp|P08582|TRFM_HUMAN,sp|O15296|LX15B_HUMAN,sp|P35579|MYH9_HUMAN,sp|P01034|CYTC_HUMAN,sp|O75326|SEM7A_HUMAN,sp|P0C869|PA24B_HUMAN,sp|O75787|RENR_HUMAN,sp|P40926|MDHM_HUMAN,sp|P02671|FIBA_HUMAN,sp|P02545|LMNA_HUMAN,sp|P04406|G3P_HUMA…
cellular_component	mitochondrial matrix	3	0.760126	sp|P49590|SYHM_HUMAN,sp|P61604|CH10_HUMAN,sp|P40926|MDHM_HUMAN
cellular_component	cell junction	9	0.763344	sp|P35579|MYH9_HUMAN,sp|Q14118|DAG1_HUMAN,sp|P61769|B2MG_HUMAN,sp|O00161|SNP23_HUMAN,sp|P50552|VASP_HUMAN,sp|P07355|ANXA2_HUMAN,sp|Q9UL25|RAB21_HUMAN,sp|P62834|RAP1A_HUMAN,sp|P60953|CDC42_HUMAN
cellular_component	keratin filament	2	0.768322	sp|Q9NSB4|KRT82_HUMAN,sp|Q14CN4|K2C72_HUMAN
cellular_component	cytoplasmic vesicle membrane	8	0.771043	sp|Q9UEU0|VTI1B_HUMAN,sp|O75787|RENR_HUMAN,sp|Q96CW1|AP2M1_HUMAN,sp|O00161|SNP23_HUMAN,sp|Q9UL25|RAB21_HUMAN,sp|P16870|CBPE_HUMAN,sp|P62834|RAP1A_HUMAN,sp|P35237|SPB6_HUMAN
cellular_component	nucleus	32	0.782144	sp|Q15018|ABRX2_HUMAN,sp|Q99436|PSB7_HUMAN,sp|P33764|S10A3_HUMAN,sp|P12273|PIP_HUMAN,sp|P07355|ANXA2_HUMAN,sp|P35052|GPC1_HUMAN,sp|O15296|LX15B_HUMAN,sp|P35579|MYH9_HUMAN,sp|P01034|CYTC_HUMAN,sp|P01011|AACT_HUMAN,sp|P40926|MDHM_HUMAN,sp|P02545|LMNA_HUMAN,sp|P04406|G3P_HUMAN,sp|Q9NTM9|CUTC_HUMAN,sp|P19012|K1C15_HUMAN,sp|O75531|BAF_HUMAN,sp|O00161|SNP23_HUMAN,sp|P02647|APOA1_HUMAN,sp|Q9HB07|MYG1_HU…
cellular_component	vesicle membrane	8	0.785805	sp|Q9UEU0|VTI1B_HUMAN,sp|O75787|RENR_HUMAN,sp|Q96CW1|AP2M1_HUMAN,sp|O00161|SNP23_HUMAN,sp|Q9UL25|RAB21_HUMAN,sp|P16870|CBPE_HUMAN,sp|P62834|RAP1A_HUMAN,sp|P35237|SPB6_HUMAN
cellular_component	nucleolus	3	0.792846	sp|Q9H190|SDCB2_HUMAN,sp|Q9NTM9|CUTC_HUMAN,sp|P33764|S10A3_HUMAN
cellular_component	coated vesicle membrane	2	0.805316	sp|Q9UEU0|VTI1B_HUMAN,sp|Q96CW1|AP2M1_HUMAN
cellular_component	chromosome	2	0.816444	sp|O75531|BAF_HUMAN,sp|P55072|TERA_HUMAN
cellular_component	organelle membrane	21	0.817402	sp|Q9UEU0|VTI1B_HUMAN,sp|P43304|GPDM_HUMAN,sp|P80108|PHLD_HUMAN,sp|P00450|CERU_HUMAN,sp|O00161|SNP23_HUMAN,sp|P07355|ANXA2_HUMAN,sp|Q99536|VAT1_HUMAN,sp|P16870|CBPE_HUMAN,sp|P60953|CDC42_HUMAN,sp|Q3MJ16|PA24E_HUMAN,sp|P01034|CYTC_HUMAN,sp|P0C869|PA24B_HUMAN,sp|O75787|RENR_HUMAN,sp|Q96CW1|AP2M1_HUMAN,sp|P40926|MDHM_HUMAN,sp|P02545|LMNA_HUMAN,sp|P04406|G3P_HUMAN,sp|Q9UL25|RAB21_HUMAN,sp|P62834|RAP1…
cellular_component	membrane part	31	0.818146	sp|Q9UEU0|VTI1B_HUMAN,sp|P61769|B2MG_HUMAN,sp|P02679|FIBG_HUMAN,sp|A1L3X0|ELOV7_HUMAN,sp|O00161|SNP23_HUMAN,sp|P50552|VASP_HUMAN,sp|P12273|PIP_HUMAN,sp|P07355|ANXA2_HUMAN,sp|P35052|GPC1_HUMAN,sp|Q99536|VAT1_HUMAN,sp|P16870|CBPE_HUMAN,sp|P07195|LDHB_HUMAN,sp|Q8IV08|PLD3_HUMAN,sp|P55072|TERA_HUMAN,sp|P08582|TRFM_HUMAN,sp|P60953|CDC42_HUMAN,sp|O15296|LX15B_HUMAN,sp|P35579|MYH9_HUMAN,sp|Q14118|DAG1_H…
cellular_component	transport vesicle	3	0.830697	sp|Q9UEU0|VTI1B_HUMAN,sp|P16870|CBPE_HUMAN,sp|Q96CW1|AP2M1_HUMAN
cellular_component	Golgi apparatus part	5	0.855785	sp|Q96DR8|MUCL1_HUMAN,sp|Q14118|DAG1_HUMAN,sp|Q9UL25|RAB21_HUMAN,sp|P35052|GPC1_HUMAN,sp|P60953|CDC42_HUMAN
cellular_component	bounding membrane of organelle	15	0.873052	sp|Q3MJ16|PA24E_HUMAN,sp|Q9UEU0|VTI1B_HUMAN,sp|P80108|PHLD_HUMAN,sp|O75787|RENR_HUMAN,sp|P0C869|PA24B_HUMAN,sp|P00450|CERU_HUMAN,sp|Q96CW1|AP2M1_HUMAN,sp|O00161|SNP23_HUMAN,sp|P07355|ANXA2_HUMAN,sp|Q9UL25|RAB21_HUMAN,sp|Q99536|VAT1_HUMAN,sp|P16870|CBPE_HUMAN,sp|P62834|RAP1A_HUMAN,sp|P35237|SPB6_HUMAN,sp|P60953|CDC42_HUMAN
cellular_component	catalytic complex	6	0.876301	sp|Q9UL18|AGO1_HUMAN,sp|Q99436|PSB7_HUMAN,sp|P28066|PSA5_HUMAN,sp|P46736|BRCC3_HUMAN,sp|P43304|GPDM_HUMAN,sp|P55072|TERA_HUMAN
cellular_component	lysosomal lumen	2	0.88695	sp|P35052|GPC1_HUMAN,sp|P02774|VTDB_HUMAN
cellular_component	Golgi apparatus	8	0.89318	sp|Q96DR8|MUCL1_HUMAN,sp|Q9UEU0|VTI1B_HUMAN,sp|Q14118|DAG1_HUMAN,sp|P61769|B2MG_HUMAN,sp|P35052|GPC1_HUMAN,sp|Q9UL25|RAB21_HUMAN,sp|P16870|CBPE_HUMAN,sp|P60953|CDC42_HUMAN
cellular_component	intracellular membrane-bounded organelle	60	0.92023	sp|P49590|SYHM_HUMAN,sp|Q15018|ABRX2_HUMAN,sp|Q99436|PSB7_HUMAN,sp|P80108|PHLD_HUMAN,sp|P33764|S10A3_HUMAN,sp|P12273|PIP_HUMAN,sp|P07355|ANXA2_HUMAN,sp|O75874|IDHC_HUMAN,sp|P35052|GPC1_HUMAN,sp|P07195|LDHB_HUMAN,sp|Q8IV08|PLD3_HUMAN,sp|P08582|TRFM_HUMAN,sp|O15296|LX15B_HUMAN,sp|P35579|MYH9_HUMAN,sp|P02652|APOA2_HUMAN,sp|P01034|CYTC_HUMAN,sp|P01011|AACT_HUMAN,sp|P0C869|PA24B_HUMAN,sp|P40926|MDHM_H…
cellular_component	coated vesicle	2	0.93183	sp|Q9UEU0|VTI1B_HUMAN,sp|Q96CW1|AP2M1_HUMAN
cellular_component	endoplasmic reticulum	14	0.9383	sp|Q9UEU0|VTI1B_HUMAN,sp|Q14118|DAG1_HUMAN,sp|P02652|APOA2_HUMAN,sp|P01034|CYTC_HUMAN,sp|P02679|FIBG_HUMAN,sp|P01008|ANT3_HUMAN,sp|P00450|CERU_HUMAN,sp|A1L3X0|ELOV7_HUMAN,sp|P02671|FIBA_HUMAN,sp|Q9UL25|RAB21_HUMAN,sp|Q8IV08|PLD3_HUMAN,sp|P55072|TERA_HUMAN,sp|P08582|TRFM_HUMAN,sp|Q7Z2K6|ERMP1_HUMAN
cellular_component	actin cytoskeleton	2	0.943871	sp|P35579|MYH9_HUMAN,sp|P50552|VASP_HUMAN
cellular_component	intrinsic component of membrane	15	0.98076	sp|P35579|MYH9_HUMAN,sp|Q9UEU0|VTI1B_HUMAN,sp|Q14118|DAG1_HUMAN,sp|O75326|SEM7A_HUMAN,sp|O75787|RENR_HUMAN,sp|A1L3X0|ELOV7_HUMAN,sp|O43278|SPIT1_HUMAN,sp|P35052|GPC1_HUMAN,sp|Q99536|VAT1_HUMAN,sp|P0DPA2|VSIG8_HUMAN,sp|Q8IV08|PLD3_HUMAN,sp|Q9UHW9|S12A6_HUMAN,sp|P08582|TRFM_HUMAN,sp|Q7Z2K6|ERMP1_HUMAN,sp|Q9BYE2|TMPSD_HUMAN
cellular_component	Golgi membrane	2	0.980799	sp|Q9UL25|RAB21_HUMAN,sp|P60953|CDC42_HUMAN
cellular_component	integral component of membrane	14	0.982291	sp|P35579|MYH9_HUMAN,sp|Q9UEU0|VTI1B_HUMAN,sp|Q14118|DAG1_HUMAN,sp|O75787|RENR_HUMAN,sp|A1L3X0|ELOV7_HUMAN,sp|O43278|SPIT1_HUMAN,sp|P35052|GPC1_HUMAN,sp|Q99536|VAT1_HUMAN,sp|P0DPA2|VSIG8_HUMAN,sp|Q8IV08|PLD3_HUMAN,sp|Q9UHW9|S12A6_HUMAN,sp|P08582|TRFM_HUMAN,sp|Q7Z2K6|ERMP1_HUMAN,sp|Q9BYE2|TMPSD_HUMAN
cellular_component	endoplasmic reticulum membrane	6	0.982872	sp|Q9UEU0|VTI1B_HUMAN,sp|Q9UL25|RAB21_HUMAN,sp|A1L3X0|ELOV7_HUMAN,sp|Q8IV08|PLD3_HUMAN,sp|P55072|TERA_HUMAN,sp|Q7Z2K6|ERMP1_HUMAN
cellular_component	endoplasmic reticulum subcompartment	6	0.983767	sp|Q9UEU0|VTI1B_HUMAN,sp|Q9UL25|RAB21_HUMAN,sp|A1L3X0|ELOV7_HUMAN,sp|Q8IV08|PLD3_HUMAN,sp|P55072|TERA_HUMAN,sp|Q7Z2K6|ERMP1_HUMAN
cellular_component	nuclear outer membrane-endoplasmic reticulum membrane network	6	0.984619	sp|Q9UEU0|VTI1B_HUMAN,sp|Q9UL25|RAB21_HUMAN,sp|A1L3X0|ELOV7_HUMAN,sp|Q8IV08|PLD3_HUMAN,sp|P55072|TERA_HUMAN,sp|Q7Z2K6|ERMP1_HUMAN
cellular_component	Golgi subcompartment	2	0.990436	sp|Q9UL25|RAB21_HUMAN,sp|P60953|CDC42_HUMAN
cellular_component	organelle subcompartment	7	0.995314	sp|Q9UEU0|VTI1B_HUMAN,sp|Q9UL25|RAB21_HUMAN,sp|A1L3X0|ELOV7_HUMAN,sp|Q8IV08|PLD3_HUMAN,sp|P55072|TERA_HUMAN,sp|Q7Z2K6|ERMP1_HUMAN,sp|P60953|CDC42_HUMAN
molecular_function	protease binding	8	0.000614286	sp|P07355|ANXA2_HUMAN,sp|P01034|CYTC_HUMAN,sp|P01008|ANT3_HUMAN,sp|Q16610|ECM1_HUMAN,sp|P01023|A2MG_HUMAN,sp|P01040|CYTA_HUMAN,sp|P55072|TERA_HUMAN,sp|P35237|SPB6_HUMAN
molecular_function	apolipoprotein receptor binding	3	0.0015049	sp|P02652|APOA2_HUMAN,sp|P60953|CDC42_HUMAN,sp|P02647|APOA1_HUMAN
molecular_function	enzyme inhibitor activity	12	0.00304721	sp|P02652|APOA2_HUMAN,sp|P01034|CYTC_HUMAN,sp|P01011|AACT_HUMAN,sp|P01008|ANT3_HUMAN,sp|P01023|A2MG_HUMAN,sp|P01040|CYTA_HUMAN,sp|O43278|SPIT1_HUMAN,sp|P02647|APOA1_HUMAN,sp|P04406|G3P_HUMAN,sp|P07355|ANXA2_HUMAN,sp|P30740|ILEU_HUMAN,sp|P35237|SPB6_HUMAN
molecular_function	amyloid-beta binding	3	0.0035598	sp|P01034|CYTC_HUMAN,sp|P02647|APOA1_HUMAN,sp|P10909|CLUS_HUMAN
molecular_function	lipoprotein particle receptor binding	4	0.00423528	sp|P02652|APOA2_HUMAN,sp|Q96CW1|AP2M1_HUMAN,sp|P02647|APOA1_HUMAN,sp|P10909|CLUS_HUMAN
molecular_function	histidine-tRNA ligase activity	2	0.00546595	sp|P49590|SYHM_HUMAN,sp|P12081|SYHC_HUMAN
molecular_function	high-density lipoprotein particle receptor binding	2	0.00546595	sp|P02652|APOA2_HUMAN,sp|P02647|APOA1_HUMAN
molecular_function	peptidase regulator activity	10	0.00552113	sp|P01034|CYTC_HUMAN,sp|P01011|AACT_HUMAN,sp|P01008|ANT3_HUMAN,sp|P01023|A2MG_HUMAN,sp|P01040|CYTA_HUMAN,sp|O43278|SPIT1_HUMAN,sp|P04406|G3P_HUMAN,sp|P30740|ILEU_HUMAN,sp|P55072|TERA_HUMAN,sp|P35237|SPB6_HUMAN
molecular_function	polyubiquitin modification-dependent protein binding	3	0.00673772	sp|Q15018|ABRX2_HUMAN,sp|P46736|BRCC3_HUMAN,sp|P55072|TERA_HUMAN
molecular_function	endopeptidase inhibitor activity	9	0.00687003	sp|P01034|CYTC_HUMAN,sp|P01011|AACT_HUMAN,sp|P01008|ANT3_HUMAN,sp|P01023|A2MG_HUMAN,sp|P01040|CYTA_HUMAN,sp|O43278|SPIT1_HUMAN,sp|P04406|G3P_HUMAN,sp|P30740|ILEU_HUMAN,sp|P35237|SPB6_HUMAN
molecular_function	peptidase inhibitor activity	9	0.00687003	sp|P01034|CYTC_HUMAN,sp|P01011|AACT_HUMAN,sp|P01008|ANT3_HUMAN,sp|P01023|A2MG_HUMAN,sp|P01040|CYTA_HUMAN,sp|O43278|SPIT1_HUMAN,sp|P04406|G3P_HUMAN,sp|P30740|ILEU_HUMAN,sp|P35237|SPB6_HUMAN
molecular_function	endopeptidase regulator activity	9	0.00790782	sp|P01034|CYTC_HUMAN,sp|P01011|AACT_HUMAN,sp|P01008|ANT3_HUMAN,sp|P01023|A2MG_HUMAN,sp|P01040|CYTA_HUMAN,sp|O43278|SPIT1_HUMAN,sp|P04406|G3P_HUMAN,sp|P30740|ILEU_HUMAN,sp|P35237|SPB6_HUMAN
molecular_function	chaperone binding	4	0.012124	sp|P02675|FIBB_HUMAN,sp|P61604|CH10_HUMAN,sp|P00450|CERU_HUMAN,sp|P10909|CLUS_HUMAN
molecular_function	carbonate dehydratase activity	2	0.0156025	sp|P00918|CAH2_HUMAN,sp|P23280|CAH6_HUMAN
molecular_function	phospholipase D activity	2	0.0156025	sp|P80108|PHLD_HUMAN,sp|Q8IV08|PLD3_HUMAN
molecular_function	high-density lipoprotein particle binding	2	0.0156025	sp|P02652|APOA2_HUMAN,sp|P02647|APOA1_HUMAN
molecular_function	phosphatidylcholine 1-acylhydrolase activity	2	0.0156025	sp|Q3MJ16|PA24E_HUMAN,sp|P0C869|PA24B_HUMAN
molecular_function	hemoglobin binding	2	0.0156025	sp|P00738|HPT_HUMAN,sp|P68871|HBB_HUMAN
molecular_function	apolipoprotein A-I receptor binding	2	0.0156025	sp|P60953|CDC42_HUMAN,sp|P02647|APOA1_HUMAN
molecular_function	iron ion binding	4	0.0160242	sp|P68871|HBB_HUMAN,sp|P08582|TRFM_HUMAN,sp|P69905|HBA_HUMAN,sp|O15296|LX15B_HUMAN
molecular_function	extracellular matrix binding	4	0.0160242	sp|P07355|ANXA2_HUMAN,sp|Q14118|DAG1_HUMAN,sp|P35052|GPC1_HUMAN,sp|Q16610|ECM1_HUMAN
molecular_function	lipase inhibitor activity	3	0.0169055	sp|P07355|ANXA2_HUMAN,sp|P02652|APOA2_HUMAN,sp|P02647|APOA1_HUMAN
molecular_function	serine-type endopeptidase inhibitor activity	6	0.0197116	sp|P01011|AACT_HUMAN,sp|P01008|ANT3_HUMAN,sp|P01023|A2MG_HUMAN,sp|P30740|ILEU_HUMAN,sp|O43278|SPIT1_HUMAN,sp|P35237|SPB6_HUMAN
molecular_function	transition metal ion binding	13	0.023988	sp|P00918|CAH2_HUMAN,sp|P00450|CERU_HUMAN,sp|P33764|S10A3_HUMAN,sp|P23280|CAH6_HUMAN,sp|Q9NTM9|CUTC_HUMAN,sp|P26447|S10A4_HUMAN,sp|P35052|GPC1_HUMAN,sp|Q99536|VAT1_HUMAN,sp|P16870|CBPE_HUMAN,sp|P68871|HBB_HUMAN,sp|P08582|TRFM_HUMAN,sp|P69905|HBA_HUMAN,sp|O15296|LX15B_HUMAN
molecular_function	modification-dependent protein binding	3	0.0240118	sp|Q15018|ABRX2_HUMAN,sp|P46736|BRCC3_HUMAN,sp|P55072|TERA_HUMAN
molecular_function	oxygen carrier activity	2	0.0297	sp|P68871|HBB_HUMAN,sp|P69905|HBA_HUMAN
molecular_function	phospholipase activity	4	0.0389641	sp|Q3MJ16|PA24E_HUMAN,sp|P80108|PHLD_HUMAN,sp|P0C869|PA24B_HUMAN,sp|Q8IV08|PLD3_HUMAN
molecular_function	steroid binding	3	0.0423149	sp|P02652|APOA2_HUMAN,sp|P02774|VTDB_HUMAN,sp|P02647|APOA1_HUMAN
molecular_function	laminin binding	3	0.0423149	sp|Q14118|DAG1_HUMAN,sp|P35052|GPC1_HUMAN,sp|Q16610|ECM1_HUMAN
molecular_function	enzyme regulator activity	14	0.0433944	sp|P02652|APOA2_HUMAN,sp|P01034|CYTC_HUMAN,sp|P01011|AACT_HUMAN,sp|P01008|ANT3_HUMAN,sp|P01023|A2MG_HUMAN,sp|P01040|CYTA_HUMAN,sp|O43278|SPIT1_HUMAN,sp|P02647|APOA1_HUMAN,sp|P04406|G3P_HUMAN,sp|P07355|ANXA2_HUMAN,sp|P46736|BRCC3_HUMAN,sp|P55072|TERA_HUMAN,sp|P30740|ILEU_HUMAN,sp|P35237|SPB6_HUMAN
molecular_function	lipase activity	4	0.0466262	sp|Q3MJ16|PA24E_HUMAN,sp|P80108|PHLD_HUMAN,sp|P0C869|PA24B_HUMAN,sp|Q8IV08|PLD3_HUMAN
molecular_function	scavenger receptor activity	2	0.0471268	sp|Q08380|LG3BP_HUMAN,sp|Q9BYE2|TMPSD_HUMAN
molecular_function	cargo receptor activity	2	0.0471268	sp|Q08380|LG3BP_HUMAN,sp|Q9BYE2|TMPSD_HUMAN
molecular_function	phosphatidylcholine-sterol O-acyltransferase activator activity	2	0.0471268	sp|P02652|APOA2_HUMAN,sp|P02647|APOA1_HUMAN
molecular_function	lipoprotein particle binding	2	0.0471268	sp|P02652|APOA2_HUMAN,sp|P02647|APOA1_HUMAN
molecular_function	protein-lipid complex binding	2	0.0471268	sp|P02652|APOA2_HUMAN,sp|P02647|APOA1_HUMAN
molecular_function	phospholipase A2 activity (consuming 1,2-dipalmitoylphosphatidylcholine)	2	0.0471268	sp|Q3MJ16|PA24E_HUMAN,sp|P0C869|PA24B_HUMAN
molecular_function	phospholipase A2 activity consuming 1,2-dioleoylphosphatidylethanolamine)	2	0.0471268	sp|Q3MJ16|PA24E_HUMAN,sp|P0C869|PA24B_HUMAN
molecular_function	protein binding, bridging	4	0.0642846	sp|P02675|FIBB_HUMAN,sp|P02679|FIBG_HUMAN,sp|P01040|CYTA_HUMAN,sp|P02671|FIBA_HUMAN
molecular_function	cholesterol transporter activity	2	0.0673214	sp|P02652|APOA2_HUMAN,sp|P02647|APOA1_HUMAN
molecular_function	oxygen binding	2	0.0673214	sp|P68871|HBB_HUMAN,sp|P69905|HBA_HUMAN
molecular_function	molecular carrier activity	2	0.0673214	sp|P68871|HBB_HUMAN,sp|P69905|HBA_HUMAN
molecular_function	molecular function regulator	17	0.0720958	sp|Q9UEU0|VTI1B_HUMAN,sp|P80108|PHLD_HUMAN,sp|P01040|CYTA_HUMAN,sp|P02647|APOA1_HUMAN,sp|P07355|ANXA2_HUMAN,sp|P46736|BRCC3_HUMAN,sp|P55072|TERA_HUMAN,sp|P30740|ILEU_HUMAN,sp|P01011|AACT_HUMAN,sp|P01034|CYTC_HUMAN,sp|P02652|APOA2_HUMAN,sp|P01008|ANT3_HUMAN,sp|P01023|A2MG_HUMAN,sp|O43278|SPIT1_HUMAN,sp|P04406|G3P_HUMAN,sp|P62834|RAP1A_HUMAN,sp|P35237|SPB6_HUMAN
molecular_function	copper ion binding	3	0.0794457	sp|Q9NTM9|CUTC_HUMAN,sp|P35052|GPC1_HUMAN,sp|P00450|CERU_HUMAN
molecular_function	identical protein binding	23	0.080605	sp|P49590|SYHM_HUMAN,sp|P61769|B2MG_HUMAN,sp|O75531|BAF_HUMAN,sp|P02679|FIBG_HUMAN,sp|P02647|APOA1_HUMAN,sp|Q15631|TSN_HUMAN,sp|P07355|ANXA2_HUMAN,sp|O75874|IDHC_HUMAN,sp|P07195|LDHB_HUMAN,sp|P55072|TERA_HUMAN,sp|P35579|MYH9_HUMAN,sp|P01034|CYTC_HUMAN,sp|P02652|APOA2_HUMAN,sp|Q719H9|KCTD1_HUMAN,sp|P01008|ANT3_HUMAN,sp|P40926|MDHM_HUMAN,sp|P02545|LMNA_HUMAN,sp|P00492|HPRT_HUMAN,sp|P04406|G3P_HUMAN…
molecular_function	protein binding	55	0.0834888	sp|P49590|SYHM_HUMAN,sp|Q15018|ABRX2_HUMAN,sp|P01040|CYTA_HUMAN,sp|P12273|PIP_HUMAN,sp|P07355|ANXA2_HUMAN,sp|O75874|IDHC_HUMAN,sp|P35052|GPC1_HUMAN,sp|P07195|LDHB_HUMAN,sp|P35579|MYH9_HUMAN,sp|P02652|APOA2_HUMAN,sp|P01034|CYTC_HUMAN,sp|O75326|SEM7A_HUMAN,sp|O75787|RENR_HUMAN,sp|P40926|MDHM_HUMAN,sp|P02671|FIBA_HUMAN,sp|P02545|LMNA_HUMAN,sp|P00738|HPT_HUMAN,sp|P04406|G3P_HUMAN,sp|P19012|K1C15_HUMA…
molecular_function	cation binding	29	0.0864342	sp|P43304|GPDM_HUMAN,sp|P16930|FAAA_HUMAN,sp|P02679|FIBG_HUMAN,sp|P00450|CERU_HUMAN,sp|P33764|S10A3_HUMAN,sp|P23280|CAH6_HUMAN,sp|P07355|ANXA2_HUMAN,sp|O75874|IDHC_HUMAN,sp|P46736|BRCC3_HUMAN,sp|Q99536|VAT1_HUMAN,sp|P35052|GPC1_HUMAN,sp|P16870|CBPE_HUMAN,sp|P08582|TRFM_HUMAN,sp|O15296|LX15B_HUMAN,sp|Q3MJ16|PA24E_HUMAN,sp|Q14118|DAG1_HUMAN,sp|P02652|APOA2_HUMAN,sp|P00918|CAH2_HUMAN,sp|P0C869|PA24B…
molecular_function	receptor binding	15	0.088591	sp|P02652|APOA2_HUMAN,sp|P02679|FIBG_HUMAN,sp|O75326|SEM7A_HUMAN,sp|Q16610|ECM1_HUMAN,sp|P01023|A2MG_HUMAN,sp|Q96CW1|AP2M1_HUMAN,sp|P02647|APOA1_HUMAN,sp|P02671|FIBA_HUMAN,sp|P26447|S10A4_HUMAN,sp|P02675|FIBB_HUMAN,sp|O75874|IDHC_HUMAN,sp|P16870|CBPE_HUMAN,sp|P55072|TERA_HUMAN,sp|P10909|CLUS_HUMAN,sp|P60953|CDC42_HUMAN
molecular_function	phospholipase A2 activity	2	0.0897857	sp|Q3MJ16|PA24E_HUMAN,sp|P0C869|PA24B_HUMAN
molecular_function	phosphatidylinositol-4,5-bisphosphate binding	2	0.0897857	sp|P07355|ANXA2_HUMAN,sp|Q9H190|SDCB2_HUMAN
molecular_function	sterol transporter activity	2	0.0897857	sp|P02652|APOA2_HUMAN,sp|P02647|APOA1_HUMAN
molecular_function	molecular adaptor activity	4	0.096406	sp|P02675|FIBB_HUMAN,sp|P02679|FIBG_HUMAN,sp|P01040|CYTA_HUMAN,sp|P02671|FIBA_HUMAN
molecular_function	lysophospholipase activity	2	0.114079	sp|Q3MJ16|PA24E_HUMAN,sp|P0C869|PA24B_HUMAN
molecular_function	low-density lipoprotein particle receptor binding	2	0.114079	sp|Q96CW1|AP2M1_HUMAN,sp|P10909|CLUS_HUMAN
molecular_function	protein domain specific binding	8	0.116768	sp|P35579|MYH9_HUMAN,sp|P04406|G3P_HUMAN,sp|Q14118|DAG1_HUMAN,sp|O75531|BAF_HUMAN,sp|Q96CW1|AP2M1_HUMAN,sp|P55072|TERA_HUMAN,sp|P50552|VASP_HUMAN,sp|P60953|CDC42_HUMAN
molecular_function	aminoacyl-tRNA ligase activity	2	0.139813	sp|P49590|SYHM_HUMAN,sp|P12081|SYHC_HUMAN
molecular_function	ligase activity, forming carbon-oxygen bonds	2	0.139813	sp|P49590|SYHM_HUMAN,sp|P12081|SYHC_HUMAN
molecular_function	ADP binding	2	0.139813	sp|P35579|MYH9_HUMAN,sp|P55072|TERA_HUMAN
molecular_function	phosphatidylinositol bisphosphate binding	2	0.139813	sp|P07355|ANXA2_HUMAN,sp|Q9H190|SDCB2_HUMAN
molecular_function	tubulin binding	4	0.148658	sp|P04406|G3P_HUMAN,sp|Q14118|DAG1_HUMAN,sp|Q15018|ABRX2_HUMAN,sp|Q9HC35|EMAL4_HUMAN
molecular_function	ion binding	42	0.149035	sp|P49590|SYHM_HUMAN,sp|P33764|S10A3_HUMAN,sp|P07355|ANXA2_HUMAN,sp|O75874|IDHC_HUMAN,sp|P35052|GPC1_HUMAN,sp|P08582|TRFM_HUMAN,sp|O15296|LX15B_HUMAN,sp|P35579|MYH9_HUMAN,sp|P02652|APOA2_HUMAN,sp|P0C869|PA24B_HUMAN,sp|P02671|FIBA_HUMAN,sp|Q9NTM9|CUTC_HUMAN,sp|P06737|PYGL_HUMAN,sp|P62834|RAP1A_HUMAN,sp|P68871|HBB_HUMAN,sp|P69905|HBA_HUMAN,sp|Q6ZNF0|ACP7_HUMAN,sp|P12081|SYHC_HUMAN,sp|P43304|GPDM_HU…
molecular_function	metal ion binding	27	0.151512	sp|P43304|GPDM_HUMAN,sp|P16930|FAAA_HUMAN,sp|P02679|FIBG_HUMAN,sp|P00450|CERU_HUMAN,sp|P33764|S10A3_HUMAN,sp|P23280|CAH6_HUMAN,sp|P07355|ANXA2_HUMAN,sp|O75874|IDHC_HUMAN,sp|P46736|BRCC3_HUMAN,sp|Q99536|VAT1_HUMAN,sp|P35052|GPC1_HUMAN,sp|P16870|CBPE_HUMAN,sp|P08582|TRFM_HUMAN,sp|O15296|LX15B_HUMAN,sp|Q3MJ16|PA24E_HUMAN,sp|Q14118|DAG1_HUMAN,sp|P00918|CAH2_HUMAN,sp|P0C869|PA24B_HUMAN,sp|P61604|CH10_…
molecular_function	calcium-dependent protein binding	3	0.16234	sp|P07355|ANXA2_HUMAN,sp|P26447|S10A4_HUMAN,sp|P01023|A2MG_HUMAN
molecular_function	cholesterol binding	2	0.166644	sp|P02652|APOA2_HUMAN,sp|P02647|APOA1_HUMAN
molecular_function	sterol binding	2	0.166644	sp|P02652|APOA2_HUMAN,sp|P02647|APOA1_HUMAN
molecular_function	disordered domain specific binding	2	0.166644	sp|P04406|G3P_HUMAN,sp|Q96CW1|AP2M1_HUMAN
molecular_function	SNAP receptor activity	2	0.194273	sp|Q9UEU0|VTI1B_HUMAN,sp|O00161|SNP23_HUMAN
molecular_function	vitamin binding	2	0.194273	sp|P06737|PYGL_HUMAN,sp|P02774|VTDB_HUMAN
molecular_function	heat shock protein binding	2	0.194273	sp|P02652|APOA2_HUMAN,sp|P02647|APOA1_HUMAN
molecular_function	phosphatidylinositol phosphate binding	2	0.194273	sp|P07355|ANXA2_HUMAN,sp|Q9H190|SDCB2_HUMAN
molecular_function	lipid binding	9	0.198963	sp|P02652|APOA2_HUMAN,sp|P0C869|PA24B_HUMAN,sp|Q96CW1|AP2M1_HUMAN,sp|P02774|VTDB_HUMAN,sp|P02647|APOA1_HUMAN,sp|Q9H190|SDCB2_HUMAN,sp|P07355|ANXA2_HUMAN,sp|P55072|TERA_HUMAN,sp|O15296|LX15B_HUMAN
molecular_function	NAD binding	3	0.200768	sp|P04406|G3P_HUMAN,sp|O75874|IDHC_HUMAN,sp|P07195|LDHB_HUMAN
molecular_function	microtubule binding	3	0.220744	sp|P04406|G3P_HUMAN,sp|Q15018|ABRX2_HUMAN,sp|Q9HC35|EMAL4_HUMAN
molecular_function	protein C-terminus binding	3	0.220744	sp|Q9H190|SDCB2_HUMAN,sp|O75531|BAF_HUMAN,sp|Q16610|ECM1_HUMAN
molecular_function	calcium-dependent phospholipid binding	2	0.222436	sp|P07355|ANXA2_HUMAN,sp|P0C869|PA24B_HUMAN
molecular_function	heme binding	2	0.222436	sp|P68871|HBB_HUMAN,sp|P69905|HBA_HUMAN
molecular_function	tetrapyrrole binding	2	0.222436	sp|P68871|HBB_HUMAN,sp|P69905|HBA_HUMAN
molecular_function	catalytic activity, acting on a tRNA	2	0.222436	sp|P49590|SYHM_HUMAN,sp|P12081|SYHC_HUMAN
molecular_function	peptide binding	4	0.242302	sp|P01034|CYTC_HUMAN,sp|Q96CW1|AP2M1_HUMAN,sp|P02647|APOA1_HUMAN,sp|P10909|CLUS_HUMAN
molecular_function	actin binding	6	0.244247	sp|P35579|MYH9_HUMAN,sp|P26447|S10A4_HUMAN,sp|Q14118|DAG1_HUMAN,sp|P02774|VTDB_HUMAN,sp|P50552|VASP_HUMAN,sp|P12273|PIP_HUMAN
molecular_function	phosphoric diester hydrolase activity	2	0.250905	sp|P80108|PHLD_HUMAN,sp|Q8IV08|PLD3_HUMAN
molecular_function	alcohol binding	2	0.250905	sp|P02652|APOA2_HUMAN,sp|P02647|APOA1_HUMAN
molecular_function	binding	74	0.256792	sp|P01040|CYTA_HUMAN,sp|P33764|S10A3_HUMAN,sp|O75874|IDHC_HUMAN,sp|P35052|GPC1_HUMAN,sp|P08582|TRFM_HUMAN,sp|O15296|LX15B_HUMAN,sp|O75326|SEM7A_HUMAN,sp|P0C869|PA24B_HUMAN,sp|O75787|RENR_HUMAN,sp|P02671|FIBA_HUMAN,sp|P02545|LMNA_HUMAN,sp|Q9NTM9|CUTC_HUMAN,sp|P04406|G3P_HUMAN,sp|P00738|HPT_HUMAN,sp|P19012|K1C15_HUMAN,sp|P81605|DCD_HUMAN,sp|P62834|RAP1A_HUMAN,sp|P10909|CLUS_HUMAN,sp|P12081|SYHC_HUM…
molecular_function	metallopeptidase activity	3	0.261781	sp|P46736|BRCC3_HUMAN,sp|P16870|CBPE_HUMAN,sp|Q7Z2K6|ERMP1_HUMAN
molecular_function	cytoskeletal protein binding	10	0.275256	sp|P35579|MYH9_HUMAN,sp|Q14118|DAG1_HUMAN,sp|Q15018|ABRX2_HUMAN,sp|P02774|VTDB_HUMAN,sp|P50552|VASP_HUMAN,sp|P12273|PIP_HUMAN,sp|P04406|G3P_HUMAN,sp|P26447|S10A4_HUMAN,sp|P07355|ANXA2_HUMAN,sp|Q9HC35|EMAL4_HUMAN
molecular_function	oxidoreductase activity, acting on CH-OH group of donors	4	0.276198	sp|O75874|IDHC_HUMAN,sp|P43304|GPDM_HUMAN,sp|P07195|LDHB_HUMAN,sp|P40926|MDHM_HUMAN
molecular_function	channel regulator activity	2	0.279482	sp|Q9UEU0|VTI1B_HUMAN,sp|P80108|PHLD_HUMAN
molecular_function	NADP binding	2	0.279482	sp|P04406|G3P_HUMAN,sp|O75874|IDHC_HUMAN
molecular_function	carboxylic ester hydrolase activity	3	0.282679	sp|Q3MJ16|PA24E_HUMAN,sp|P00918|CAH2_HUMAN,sp|P0C869|PA24B_HUMAN
molecular_function	protein homodimerization activity	10	0.295279	sp|P35579|MYH9_HUMAN,sp|P49590|SYHM_HUMAN,sp|Q9H190|SDCB2_HUMAN,sp|P02652|APOA2_HUMAN,sp|O75531|BAF_HUMAN,sp|O75874|IDHC_HUMAN,sp|P02679|FIBG_HUMAN,sp|P06737|PYGL_HUMAN,sp|P40926|MDHM_HUMAN,sp|P00492|HPRT_HUMAN
molecular_function	cofactor binding	7	0.295293	sp|P04406|G3P_HUMAN,sp|O75874|IDHC_HUMAN,sp|P06737|PYGL_HUMAN,sp|P07195|LDHB_HUMAN,sp|O95831|AIFM1_HUMAN,sp|P68871|HBB_HUMAN,sp|P69905|HBA_HUMAN
molecular_function	phospholipid binding	5	0.296917	sp|P07355|ANXA2_HUMAN,sp|Q9H190|SDCB2_HUMAN,sp|P02652|APOA2_HUMAN,sp|P0C869|PA24B_HUMAN,sp|P02647|APOA1_HUMAN
molecular_function	cysteine-type endopeptidase inhibitor activity	2	0.307994	sp|P01034|CYTC_HUMAN,sp|P01040|CYTA_HUMAN
molecular_function	hydro-lyase activity	2	0.307994	sp|P00918|CAH2_HUMAN,sp|P23280|CAH6_HUMAN
molecular_function	growth factor binding	2	0.307994	sp|P35052|GPC1_HUMAN,sp|P01023|A2MG_HUMAN
molecular_function	structural molecule activity	11	0.309925	sp|Q14118|DAG1_HUMAN,sp|P02679|FIBG_HUMAN,sp|P01040|CYTA_HUMAN,sp|P02545|LMNA_HUMAN,sp|P02671|FIBA_HUMAN,sp|P02675|FIBB_HUMAN,sp|P19012|K1C15_HUMAN,sp|Q9NSB4|KRT82_HUMAN,sp|Q92764|KRT35_HUMAN,sp|Q14CN4|K2C72_HUMAN,sp|Q6A163|K1C39_HUMAN
molecular_function	amide binding	4	0.310852	sp|P01034|CYTC_HUMAN,sp|Q96CW1|AP2M1_HUMAN,sp|P02647|APOA1_HUMAN,sp|P10909|CLUS_HUMAN
molecular_function	cell adhesion molecule binding	10	0.326049	sp|P35579|MYH9_HUMAN,sp|P02679|FIBG_HUMAN,sp|O75326|SEM7A_HUMAN,sp|P50552|VASP_HUMAN,sp|P02671|FIBA_HUMAN,sp|P07355|ANXA2_HUMAN,sp|O75874|IDHC_HUMAN,sp|P02675|FIBB_HUMAN,sp|P16870|CBPE_HUMAN,sp|P50990|TCPQ_HUMAN
molecular_function	coenzyme binding	5	0.327313	sp|P04406|G3P_HUMAN,sp|O75874|IDHC_HUMAN,sp|P06737|PYGL_HUMAN,sp|P07195|LDHB_HUMAN,sp|O95831|AIFM1_HUMAN
molecular_function	lipid transporter activity	2	0.336296	sp|P02652|APOA2_HUMAN,sp|P02647|APOA1_HUMAN
molecular_function	protein dimerization activity	12	0.341912	sp|P35579|MYH9_HUMAN,sp|P49590|SYHM_HUMAN,sp|P02652|APOA2_HUMAN,sp|O75531|BAF_HUMAN,sp|P02679|FIBG_HUMAN,sp|P40926|MDHM_HUMAN,sp|P12273|PIP_HUMAN,sp|P00492|HPRT_HUMAN,sp|Q9H190|SDCB2_HUMAN,sp|O75874|IDHC_HUMAN,sp|P06737|PYGL_HUMAN,sp|O95831|AIFM1_HUMAN
molecular_function	SNARE binding	2	0.364262	sp|Q9UEU0|VTI1B_HUMAN,sp|O00161|SNP23_HUMAN
molecular_function	threonine-type endopeptidase activity	2	0.364262	sp|Q99436|PSB7_HUMAN,sp|P28066|PSA5_HUMAN
molecular_function	carbon-oxygen lyase activity	2	0.364262	sp|P00918|CAH2_HUMAN,sp|P23280|CAH6_HUMAN
molecular_function	threonine-type peptidase activity	2	0.364262	sp|Q99436|PSB7_HUMAN,sp|P28066|PSA5_HUMAN
molecular_function	zinc ion binding	5	0.373487	sp|P00918|CAH2_HUMAN,sp|Q99536|VAT1_HUMAN,sp|P16870|CBPE_HUMAN,sp|P33764|S10A3_HUMAN,sp|P23280|CAH6_HUMAN
molecular_function	phosphatidylinositol binding	2	0.391786	sp|P07355|ANXA2_HUMAN,sp|Q9H190|SDCB2_HUMAN
molecular_function	enzyme activator activity	4	0.416181	sp|P02652|APOA2_HUMAN,sp|P01023|A2MG_HUMAN,sp|P55072|TERA_HUMAN,sp|P02647|APOA1_HUMAN
molecular_function	oxidoreductase activity	10	0.421613	sp|P43304|GPDM_HUMAN,sp|P00450|CERU_HUMAN,sp|P40926|MDHM_HUMAN,sp|P04406|G3P_HUMAN,sp|O75874|IDHC_HUMAN,sp|Q99536|VAT1_HUMAN,sp|O95831|AIFM1_HUMAN,sp|P07195|LDHB_HUMAN,sp|P68871|HBB_HUMAN,sp|O15296|LX15B_HUMAN
molecular_function	enzyme binding	17	0.422117	sp|O75531|BAF_HUMAN,sp|Q16610|ECM1_HUMAN,sp|P01040|CYTA_HUMAN,sp|P02647|APOA1_HUMAN,sp|P07355|ANXA2_HUMAN,sp|P07195|LDHB_HUMAN,sp|P55072|TERA_HUMAN,sp|P60953|CDC42_HUMAN,sp|Q9UL18|AGO1_HUMAN,sp|P01034|CYTC_HUMAN,sp|O75787|RENR_HUMAN,sp|P01008|ANT3_HUMAN,sp|P01023|A2MG_HUMAN,sp|P62834|RAP1A_HUMAN,sp|Q9UHW9|S12A6_HUMAN,sp|P10909|CLUS_HUMAN,sp|P35237|SPB6_HUMAN
molecular_function	oxidoreductase activity, acting on the CH-OH group of donors, NAD or NADP as acceptor	3	0.429555	sp|O75874|IDHC_HUMAN,sp|P07195|LDHB_HUMAN,sp|P40926|MDHM_HUMAN
molecular_function	receptor activity	3	0.449935	sp|Q08380|LG3BP_HUMAN,sp|O75787|RENR_HUMAN,sp|Q9BYE2|TMPSD_HUMAN
molecular_function	molecular transducer activity	3	0.449935	sp|Q08380|LG3BP_HUMAN,sp|O75787|RENR_HUMAN,sp|Q9BYE2|TMPSD_HUMAN
molecular_function	peptidase activity	9	0.45607	sp|Q99436|PSB7_HUMAN,sp|P12273|PIP_HUMAN,sp|P00738|HPT_HUMAN,sp|P46736|BRCC3_HUMAN,sp|P28066|PSA5_HUMAN,sp|P81605|DCD_HUMAN,sp|P16870|CBPE_HUMAN,sp|Q7Z2K6|ERMP1_HUMAN,sp|Q9BYE2|TMPSD_HUMAN
molecular_function	nucleotide binding	16	0.467162	sp|P49590|SYHM_HUMAN,sp|O75874|IDHC_HUMAN,sp|P07195|LDHB_HUMAN,sp|P55072|TERA_HUMAN,sp|P50990|TCPQ_HUMAN,sp|P60953|CDC42_HUMAN,sp|P35579|MYH9_HUMAN,sp|P61604|CH10_HUMAN,sp|P00492|HPRT_HUMAN,sp|P06732|KCRM_HUMAN,sp|P04406|G3P_HUMAN,sp|Q9UL25|RAB21_HUMAN,sp|P06737|PYGL_HUMAN,sp|P62834|RAP1A_HUMAN,sp|O95831|AIFM1_HUMAN,sp|P12081|SYHC_HUMAN
molecular_function	transferase activity, transferring glycosyl groups	2	0.470896	sp|P06737|PYGL_HUMAN,sp|P00492|HPRT_HUMAN
molecular_function	drug binding	11	0.4721	sp|P35579|MYH9_HUMAN,sp|P49590|SYHM_HUMAN,sp|P61604|CH10_HUMAN,sp|P02774|VTDB_HUMAN,sp|P06732|KCRM_HUMAN,sp|P06737|PYGL_HUMAN,sp|P55072|TERA_HUMAN,sp|P50990|TCPQ_HUMAN,sp|P68871|HBB_HUMAN,sp|P12081|SYHC_HUMAN,sp|P69905|HBA_HUMAN
molecular_function	nucleoside phosphate binding	16	0.475843	sp|P49590|SYHM_HUMAN,sp|O75874|IDHC_HUMAN,sp|P07195|LDHB_HUMAN,sp|P55072|TERA_HUMAN,sp|P50990|TCPQ_HUMAN,sp|P60953|CDC42_HUMAN,sp|P35579|MYH9_HUMAN,sp|P61604|CH10_HUMAN,sp|P00492|HPRT_HUMAN,sp|P06732|KCRM_HUMAN,sp|P04406|G3P_HUMAN,sp|Q9UL25|RAB21_HUMAN,sp|P06737|PYGL_HUMAN,sp|P62834|RAP1A_HUMAN,sp|O95831|AIFM1_HUMAN,sp|P12081|SYHC_HUMAN
molecular_function	hydrolase activity, acting on ester bonds	7	0.486047	sp|Q15631|TSN_HUMAN,sp|Q3MJ16|PA24E_HUMAN,sp|P00918|CAH2_HUMAN,sp|P80108|PHLD_HUMAN,sp|P0C869|PA24B_HUMAN,sp|Q8IV08|PLD3_HUMAN,sp|Q6ZNF0|ACP7_HUMAN
molecular_function	sequence-specific DNA binding	2	0.495911	sp|Q15631|TSN_HUMAN,sp|Q9UL18|AGO1_HUMAN
molecular_function	DNA binding	5	0.510239	sp|Q15631|TSN_HUMAN,sp|Q9UL18|AGO1_HUMAN,sp|P01011|AACT_HUMAN,sp|O75531|BAF_HUMAN,sp|O95831|AIFM1_HUMAN
molecular_function	calcium ion binding	7	0.511076	sp|P07355|ANXA2_HUMAN,sp|P26447|S10A4_HUMAN,sp|Q14118|DAG1_HUMAN,sp|P43304|GPDM_HUMAN,sp|P0C869|PA24B_HUMAN,sp|P33764|S10A3_HUMAN,sp|O15296|LX15B_HUMAN
molecular_function	phosphoric ester hydrolase activity	3	0.528257	sp|P80108|PHLD_HUMAN,sp|Q8IV08|PLD3_HUMAN,sp|Q6ZNF0|ACP7_HUMAN
molecular_function	peptidase activity, acting on L-amino acid peptides	8	0.528869	sp|Q99436|PSB7_HUMAN,sp|P12273|PIP_HUMAN,sp|P00738|HPT_HUMAN,sp|P46736|BRCC3_HUMAN,sp|P28066|PSA5_HUMAN,sp|P16870|CBPE_HUMAN,sp|Q7Z2K6|ERMP1_HUMAN,sp|Q9BYE2|TMPSD_HUMAN
molecular_function	small molecule binding	19	0.531946	sp|P49590|SYHM_HUMAN,sp|P02774|VTDB_HUMAN,sp|P02647|APOA1_HUMAN,sp|O75874|IDHC_HUMAN,sp|P07195|LDHB_HUMAN,sp|P55072|TERA_HUMAN,sp|P50990|TCPQ_HUMAN,sp|P60953|CDC42_HUMAN,sp|P35579|MYH9_HUMAN,sp|P02652|APOA2_HUMAN,sp|P61604|CH10_HUMAN,sp|P00492|HPRT_HUMAN,sp|P06732|KCRM_HUMAN,sp|P04406|G3P_HUMAN,sp|Q9UL25|RAB21_HUMAN,sp|P06737|PYGL_HUMAN,sp|P62834|RAP1A_HUMAN,sp|O95831|AIFM1_HUMAN,sp|P12081|SYHC_H…
molecular_function	organic cyclic compound binding	30	0.565412	sp|P49590|SYHM_HUMAN,sp|O75531|BAF_HUMAN,sp|P02774|VTDB_HUMAN,sp|P02647|APOA1_HUMAN,sp|Q15631|TSN_HUMAN,sp|P07355|ANXA2_HUMAN,sp|O75874|IDHC_HUMAN,sp|P07195|LDHB_HUMAN,sp|P55072|TERA_HUMAN,sp|P50990|TCPQ_HUMAN,sp|P60953|CDC42_HUMAN,sp|P35579|MYH9_HUMAN,sp|Q9UL18|AGO1_HUMAN,sp|P02652|APOA2_HUMAN,sp|P01011|AACT_HUMAN,sp|P61604|CH10_HUMAN,sp|P40926|MDHM_HUMAN,sp|P00492|HPRT_HUMAN,sp|P06732|KCRM_HUMA…
molecular_function	catalytic activity, acting on RNA	2	0.566364	sp|P49590|SYHM_HUMAN,sp|P12081|SYHC_HUMAN
molecular_function	ligase activity	2	0.58825	sp|P49590|SYHM_HUMAN,sp|P12081|SYHC_HUMAN
molecular_function	ATP binding	8	0.596075	sp|P35579|MYH9_HUMAN,sp|P49590|SYHM_HUMAN,sp|P61604|CH10_HUMAN,sp|P06732|KCRM_HUMAN,sp|P06737|PYGL_HUMAN,sp|P50990|TCPQ_HUMAN,sp|P55072|TERA_HUMAN,sp|P12081|SYHC_HUMAN
molecular_function	purine ribonucleoside triphosphate binding	11	0.600619	sp|P35579|MYH9_HUMAN,sp|P49590|SYHM_HUMAN,sp|P61604|CH10_HUMAN,sp|P06732|KCRM_HUMAN,sp|Q9UL25|RAB21_HUMAN,sp|P06737|PYGL_HUMAN,sp|P62834|RAP1A_HUMAN,sp|P55072|TERA_HUMAN,sp|P50990|TCPQ_HUMAN,sp|P12081|SYHC_HUMAN,sp|P60953|CDC42_HUMAN
molecular_function	anion binding	19	0.602277	sp|P49590|SYHM_HUMAN,sp|P02647|APOA1_HUMAN,sp|P07355|ANXA2_HUMAN,sp|P35052|GPC1_HUMAN,sp|P55072|TERA_HUMAN,sp|P50990|TCPQ_HUMAN,sp|P60953|CDC42_HUMAN,sp|P35579|MYH9_HUMAN,sp|P02652|APOA2_HUMAN,sp|P0C869|PA24B_HUMAN,sp|P01008|ANT3_HUMAN,sp|P61604|CH10_HUMAN,sp|P06732|KCRM_HUMAN,sp|Q9H190|SDCB2_HUMAN,sp|Q9UL25|RAB21_HUMAN,sp|P06737|PYGL_HUMAN,sp|P62834|RAP1A_HUMAN,sp|O95831|AIFM1_HUMAN,sp|P12081|SY…
molecular_function	magnesium ion binding	2	0.609321	sp|O75874|IDHC_HUMAN,sp|P00492|HPRT_HUMAN
molecular_function	purine ribonucleotide binding	11	0.628393	sp|P35579|MYH9_HUMAN,sp|P49590|SYHM_HUMAN,sp|P61604|CH10_HUMAN,sp|P06732|KCRM_HUMAN,sp|Q9UL25|RAB21_HUMAN,sp|P06737|PYGL_HUMAN,sp|P62834|RAP1A_HUMAN,sp|P55072|TERA_HUMAN,sp|P50990|TCPQ_HUMAN,sp|P12081|SYHC_HUMAN,sp|P60953|CDC42_HUMAN
molecular_function	ribonucleotide binding	11	0.637445	sp|P35579|MYH9_HUMAN,sp|P49590|SYHM_HUMAN,sp|P61604|CH10_HUMAN,sp|P06732|KCRM_HUMAN,sp|Q9UL25|RAB21_HUMAN,sp|P06737|PYGL_HUMAN,sp|P62834|RAP1A_HUMAN,sp|P55072|TERA_HUMAN,sp|P50990|TCPQ_HUMAN,sp|P12081|SYHC_HUMAN,sp|P60953|CDC42_HUMAN
molecular_function	adenyl ribonucleotide binding	8	0.638297	sp|P35579|MYH9_HUMAN,sp|P49590|SYHM_HUMAN,sp|P61604|CH10_HUMAN,sp|P06732|KCRM_HUMAN,sp|P06737|PYGL_HUMAN,sp|P50990|TCPQ_HUMAN,sp|P55072|TERA_HUMAN,sp|P12081|SYHC_HUMAN
molecular_function	purine nucleotide binding	11	0.646388	sp|P35579|MYH9_HUMAN,sp|P49590|SYHM_HUMAN,sp|P61604|CH10_HUMAN,sp|P06732|KCRM_HUMAN,sp|Q9UL25|RAB21_HUMAN,sp|P06737|PYGL_HUMAN,sp|P62834|RAP1A_HUMAN,sp|P55072|TERA_HUMAN,sp|P50990|TCPQ_HUMAN,sp|P12081|SYHC_HUMAN,sp|P60953|CDC42_HUMAN
molecular_function	GTPase activity	3	0.64931	sp|Q9UL25|RAB21_HUMAN,sp|P62834|RAP1A_HUMAN,sp|P60953|CDC42_HUMAN
molecular_function	serine-type peptidase activity	3	0.64931	sp|P00738|HPT_HUMAN,sp|P16870|CBPE_HUMAN,sp|Q9BYE2|TMPSD_HUMAN
molecular_function	adenyl nucleotide binding	8	0.658505	sp|P35579|MYH9_HUMAN,sp|P49590|SYHM_HUMAN,sp|P61604|CH10_HUMAN,sp|P06732|KCRM_HUMAN,sp|P06737|PYGL_HUMAN,sp|P50990|TCPQ_HUMAN,sp|P55072|TERA_HUMAN,sp|P12081|SYHC_HUMAN
molecular_function	serine hydrolase activity	3	0.664721	sp|P00738|HPT_HUMAN,sp|P16870|CBPE_HUMAN,sp|Q9BYE2|TMPSD_HUMAN
molecular_function	Ras GTPase binding	2	0.667657	sp|P07355|ANXA2_HUMAN,sp|P62834|RAP1A_HUMAN
molecular_function	unfolded protein binding	2	0.667657	sp|P61604|CH10_HUMAN,sp|P50990|TCPQ_HUMAN
molecular_function	endopeptidase activity	5	0.671011	sp|P00738|HPT_HUMAN,sp|Q99436|PSB7_HUMAN,sp|P28066|PSA5_HUMAN,sp|Q9BYE2|TMPSD_HUMAN,sp|P12273|PIP_HUMAN
molecular_function	antioxidant activity	2	0.6855	sp|P00738|HPT_HUMAN,sp|P68871|HBB_HUMAN
molecular_function	small GTPase binding	2	0.6855	sp|P07355|ANXA2_HUMAN,sp|P62834|RAP1A_HUMAN
molecular_function	macromolecular complex binding	10	0.69112	sp|P35579|MYH9_HUMAN,sp|Q9UL18|AGO1_HUMAN,sp|P02652|APOA2_HUMAN,sp|O75326|SEM7A_HUMAN,sp|P12273|PIP_HUMAN,sp|P02647|APOA1_HUMAN,sp|Q15631|TSN_HUMAN,sp|P62834|RAP1A_HUMAN,sp|P55072|TERA_HUMAN,sp|P10909|CLUS_HUMAN
molecular_function	protein complex binding	8	0.696958	sp|Q15631|TSN_HUMAN,sp|P35579|MYH9_HUMAN,sp|Q9UL18|AGO1_HUMAN,sp|O75326|SEM7A_HUMAN,sp|P62834|RAP1A_HUMAN,sp|P55072|TERA_HUMAN,sp|P12273|PIP_HUMAN,sp|P10909|CLUS_HUMAN
molecular_function	GTP binding	3	0.721501	sp|Q9UL25|RAB21_HUMAN,sp|P62834|RAP1A_HUMAN,sp|P60953|CDC42_HUMAN
molecular_function	guanyl nucleotide binding	3	0.721501	sp|Q9UL25|RAB21_HUMAN,sp|P62834|RAP1A_HUMAN,sp|P60953|CDC42_HUMAN
molecular_function	ribonucleoside binding	3	0.721501	sp|Q9UL25|RAB21_HUMAN,sp|P62834|RAP1A_HUMAN,sp|P60953|CDC42_HUMAN
molecular_function	purine ribonucleoside binding	3	0.721501	sp|Q9UL25|RAB21_HUMAN,sp|P62834|RAP1A_HUMAN,sp|P60953|CDC42_HUMAN
molecular_function	guanyl ribonucleotide binding	3	0.721501	sp|Q9UL25|RAB21_HUMAN,sp|P62834|RAP1A_HUMAN,sp|P60953|CDC42_HUMAN
molecular_function	serine-type endopeptidase activity	2	0.734414	sp|P00738|HPT_HUMAN,sp|Q9BYE2|TMPSD_HUMAN
molecular_function	purine nucleoside binding	3	0.734491	sp|Q9UL25|RAB21_HUMAN,sp|P62834|RAP1A_HUMAN,sp|P60953|CDC42_HUMAN
molecular_function	nucleoside-triphosphatase activity	6	0.737324	sp|P35579|MYH9_HUMAN,sp|Q9UL25|RAB21_HUMAN,sp|P62834|RAP1A_HUMAN,sp|P55072|TERA_HUMAN,sp|P50990|TCPQ_HUMAN,sp|P60953|CDC42_HUMAN
molecular_function	ATPase activity	3	0.747008	sp|P35579|MYH9_HUMAN,sp|P55072|TERA_HUMAN,sp|P50990|TCPQ_HUMAN
molecular_function	ubiquitin protein ligase binding	2	0.749239	sp|P55072|TERA_HUMAN,sp|P10909|CLUS_HUMAN
molecular_function	sulfur compound binding	2	0.749239	sp|P35052|GPC1_HUMAN,sp|P01008|ANT3_HUMAN
molecular_function	heterocyclic compound binding	27	0.757971	sp|P49590|SYHM_HUMAN,sp|O75531|BAF_HUMAN,sp|Q15631|TSN_HUMAN,sp|P07355|ANXA2_HUMAN,sp|O75874|IDHC_HUMAN,sp|P07195|LDHB_HUMAN,sp|P55072|TERA_HUMAN,sp|P50990|TCPQ_HUMAN,sp|P60953|CDC42_HUMAN,sp|P35579|MYH9_HUMAN,sp|Q9UL18|AGO1_HUMAN,sp|P01011|AACT_HUMAN,sp|P61604|CH10_HUMAN,sp|P40926|MDHM_HUMAN,sp|P00492|HPRT_HUMAN,sp|P06732|KCRM_HUMAN,sp|P04406|G3P_HUMAN,sp|P26447|S10A4_HUMAN,sp|Q9UL25|RAB21_HUMAN…
molecular_function	ubiquitin-like protein ligase binding	2	0.763358	sp|P55072|TERA_HUMAN,sp|P10909|CLUS_HUMAN
molecular_function	protein heterodimerization activity	2	0.763358	sp|Q9H190|SDCB2_HUMAN,sp|P02652|APOA2_HUMAN
molecular_function	hydrolase activity	24	0.766017	sp|Q99436|PSB7_HUMAN,sp|P16930|FAAA_HUMAN,sp|P80108|PHLD_HUMAN,sp|Q9NQR4|NIT2_HUMAN,sp|P12273|PIP_HUMAN,sp|Q15631|TSN_HUMAN,sp|P46736|BRCC3_HUMAN,sp|P28066|PSA5_HUMAN,sp|P16870|CBPE_HUMAN,sp|Q8IV08|PLD3_HUMAN,sp|P55072|TERA_HUMAN,sp|P50990|TCPQ_HUMAN,sp|P60953|CDC42_HUMAN,sp|Q3MJ16|PA24E_HUMAN,sp|P35579|MYH9_HUMAN,sp|P00918|CAH2_HUMAN,sp|P0C869|PA24B_HUMAN,sp|P00738|HPT_HUMAN,sp|Q9UL25|RAB21_HUMA…
molecular_function	nucleoside binding	3	0.770649	sp|Q9UL25|RAB21_HUMAN,sp|P62834|RAP1A_HUMAN,sp|P60953|CDC42_HUMAN
molecular_function	lyase activity	2	0.776792	sp|P00918|CAH2_HUMAN,sp|P23280|CAH6_HUMAN
molecular_function	pyrophosphatase activity	6	0.790058	sp|P35579|MYH9_HUMAN,sp|Q9UL25|RAB21_HUMAN,sp|P62834|RAP1A_HUMAN,sp|P55072|TERA_HUMAN,sp|P50990|TCPQ_HUMAN,sp|P60953|CDC42_HUMAN
molecular_function	hydrolase activity, acting on acid anhydrides	6	0.790058	sp|P35579|MYH9_HUMAN,sp|Q9UL25|RAB21_HUMAN,sp|P62834|RAP1A_HUMAN,sp|P55072|TERA_HUMAN,sp|P50990|TCPQ_HUMAN,sp|P60953|CDC42_HUMAN
molecular_function	hydrolase activity, acting on acid anhydrides, in phosphorus-containing anhydrides	6	0.790058	sp|P35579|MYH9_HUMAN,sp|Q9UL25|RAB21_HUMAN,sp|P62834|RAP1A_HUMAN,sp|P55072|TERA_HUMAN,sp|P50990|TCPQ_HUMAN,sp|P60953|CDC42_HUMAN
molecular_function	carbohydrate derivative binding	13	0.791768	sp|P35579|MYH9_HUMAN,sp|P49590|SYHM_HUMAN,sp|P01008|ANT3_HUMAN,sp|P61604|CH10_HUMAN,sp|P06732|KCRM_HUMAN,sp|P35052|GPC1_HUMAN,sp|Q9UL25|RAB21_HUMAN,sp|P06737|PYGL_HUMAN,sp|P62834|RAP1A_HUMAN,sp|P55072|TERA_HUMAN,sp|P50990|TCPQ_HUMAN,sp|P12081|SYHC_HUMAN,sp|P60953|CDC42_HUMAN
molecular_function	nucleic acid binding	14	0.795046	sp|P35579|MYH9_HUMAN,sp|P49590|SYHM_HUMAN,sp|Q9UL18|AGO1_HUMAN,sp|P01011|AACT_HUMAN,sp|O75531|BAF_HUMAN,sp|P61604|CH10_HUMAN,sp|P40926|MDHM_HUMAN,sp|Q15631|TSN_HUMAN,sp|P07355|ANXA2_HUMAN,sp|P26447|S10A4_HUMAN,sp|P81605|DCD_HUMAN,sp|P0DPA2|VSIG8_HUMAN,sp|O95831|AIFM1_HUMAN,sp|P55072|TERA_HUMAN
molecular_function	ATPase activity, coupled	2	0.801698	sp|P35579|MYH9_HUMAN,sp|P50990|TCPQ_HUMAN
molecular_function	kinase binding	3	0.802756	sp|P07195|LDHB_HUMAN,sp|Q9UHW9|S12A6_HUMAN,sp|P60953|CDC42_HUMAN
molecular_function	RNA binding	11	0.811138	sp|P35579|MYH9_HUMAN,sp|P49590|SYHM_HUMAN,sp|Q9UL18|AGO1_HUMAN,sp|P61604|CH10_HUMAN,sp|P40926|MDHM_HUMAN,sp|Q15631|TSN_HUMAN,sp|P26447|S10A4_HUMAN,sp|P07355|ANXA2_HUMAN,sp|P81605|DCD_HUMAN,sp|P0DPA2|VSIG8_HUMAN,sp|P55072|TERA_HUMAN
molecular_function	GTPase binding	2	0.844303	sp|P07355|ANXA2_HUMAN,sp|P62834|RAP1A_HUMAN
molecular_function	catalytic activity, acting on a protein	10	0.844663	sp|Q99436|PSB7_HUMAN,sp|P12273|PIP_HUMAN,sp|P04406|G3P_HUMAN,sp|P00738|HPT_HUMAN,sp|P46736|BRCC3_HUMAN,sp|P28066|PSA5_HUMAN,sp|P81605|DCD_HUMAN,sp|P16870|CBPE_HUMAN,sp|Q7Z2K6|ERMP1_HUMAN,sp|Q9BYE2|TMPSD_HUMAN
molecular_function	cadherin binding	5	0.860249	sp|P35579|MYH9_HUMAN,sp|P07355|ANXA2_HUMAN,sp|O75874|IDHC_HUMAN,sp|P50990|TCPQ_HUMAN,sp|P50552|VASP_HUMAN
molecular_function	transporter activity	5	0.872365	sp|P02652|APOA2_HUMAN,sp|P62834|RAP1A_HUMAN,sp|Q96CW1|AP2M1_HUMAN,sp|Q9UHW9|S12A6_HUMAN,sp|P02647|APOA1_HUMAN
molecular_function	catalytic activity	41	0.875987	sp|P49590|SYHM_HUMAN,sp|Q99436|PSB7_HUMAN,sp|P80108|PHLD_HUMAN,sp|P12273|PIP_HUMAN,sp|O75874|IDHC_HUMAN,sp|P07195|LDHB_HUMAN,sp|Q8IV08|PLD3_HUMAN,sp|O15296|LX15B_HUMAN,sp|P35579|MYH9_HUMAN,sp|P0C869|PA24B_HUMAN,sp|P40926|MDHM_HUMAN,sp|P00738|HPT_HUMAN,sp|P04406|G3P_HUMAN,sp|P06737|PYGL_HUMAN,sp|P81605|DCD_HUMAN,sp|P62834|RAP1A_HUMAN,sp|P68871|HBB_HUMAN,sp|Q6ZNF0|ACP7_HUMAN,sp|Q9BYE2|TMPSD_HUMAN,s…
molecular_function	protein kinase binding	2	0.88594	sp|Q9UHW9|S12A6_HUMAN,sp|P60953|CDC42_HUMAN
molecular_function	transferase activity	5	0.944119	sp|P04406|G3P_HUMAN,sp|P06737|PYGL_HUMAN,sp|A1L3X0|ELOV7_HUMAN,sp|P06732|KCRM_HUMAN,sp|P00492|HPRT_HUMAN
