# Supplementary material for: Quantitative proteomics analysis of young and elderly skin with DIA mass spectrometry reveals new skin aging-related proteins
Source: Aging (Albany NY). 2020 Jun 29;12(13):13529–54. doi: 10.18632/aging.103461 (PMC7377841; doi:10.18632/aging.103461)
Supplement: Supplementary Table 6 [file aging-12-103461-s001..xlsx]

## Sheet: Sheet1
Table S6. KOG classification of DEPs
Code	Functional-Categories	Family	Protein-Number	Proteins
B	Chromatin structure and dynamics	INFORMATION STORAGE AND PROCESSING	1	sp|O75531|BAF_HUMAN
C	Energy production and conversion	METABOLISM	9	sp|P40926|MDHM_HUMAN;sp|P06732|KCRM_HUMAN;sp|O75787|RENR_HUMAN;sp|P07195|LDHB_HUMAN;sp|P69905|HBA_HUMAN;sp|O75874|IDHC_HUMAN;sp|P43304|GPDM_HUMAN;sp|P68871|HBB_HUMAN;sp|Q99536|VAT1_HUMAN
D	Cell cycle control, cell division, chromosome partitioning	CELLULAR PROCESSES AND SIGNALING	6	sp|Q6A163|K1C39_HUMAN;sp|P02545|LMNA_HUMAN;sp|Q14CN4|K2C72_HUMAN;sp|P19012|K1C15_HUMAN;sp|Q92764|KRT35_HUMAN;sp|Q9NSB4|KRT82_HUMAN
E	Amino acid transport and metabolism	METABOLISM	4	sp|Q9UHW9|S12A6_HUMAN;sp|Q9BYE2|TMPSD_HUMAN;sp|P00738|HPT_HUMAN;sp|Q9NQR4|NIT2_HUMAN
F	Nucleotide transport and metabolism	METABOLISM	1	sp|P00492|HPRT_HUMAN
G	Carbohydrate transport and metabolism	METABOLISM	4	sp|Q6ZNF0|ACP7_HUMAN;sp|P04406|G3P_HUMAN;sp|P16930|FAAA_HUMAN;sp|P06737|PYGL_HUMAN
I	Lipid transport and metabolism	METABOLISM	3	sp|P0C869|PA24B_HUMAN;sp|A1L3X0|ELOV7_HUMAN;sp|Q3MJ16|PA24E_HUMAN
J	Translation, ribosomal structure and biogenesis	INFORMATION STORAGE AND PROCESSING	3	sp|P49590|SYHM_HUMAN;sp|P12081|SYHC_HUMAN;sp|Q9UL18|AGO1_HUMAN
L	Replication, recombination and repair	INFORMATION STORAGE AND PROCESSING	1	sp|O75531|BAF_HUMAN
O	Posttranslational modification, protein turnover, chaperones	CELLULAR PROCESSES AND SIGNALING	11	sp|P50990|TCPQ_HUMAN;sp|Q99436|PSB7_HUMAN;sp|Q7Z2K6|ERMP1_HUMAN;sp|Q14CN4|K2C72_HUMAN;sp|P01023|A2MG_HUMAN;sp|P28066|PSA5_HUMAN;sp|P55072|TERA_HUMAN;sp|P46736|BRCC3_HUMAN;sp|Q9NSB4|KRT82_HUMAN;sp|O43278|SPIT1_HUMAN;sp|P61604|CH10_HUMAN
P	Inorganic ion transport and metabolism	METABOLISM	2	sp|Q9UHW9|S12A6_HUMAN;sp|Q9NTM9|CUTC_HUMAN
Q	Secondary metabolites biosynthesis, transport and catabolism	METABOLISM	1	sp|P00450|CERU_HUMAN
R	General function prediction only	POORLY CHARACTERIZED	26	sp|Q8IV08|PLD3_HUMAN;sp|Q7Z2K6|ERMP1_HUMAN;sp|Q6A163|K1C39_HUMAN;sp|Q15631|TSN_HUMAN;sp|Q9UL25|RAB21_HUMAN;sp|Q9ULI1|NWD2_HUMAN;sp|P0C869|PA24B_HUMAN;sp|Q14CN4|K2C72_HUMAN;sp|O95831|AIFM1_HUMAN;sp|Q9HB07|MYG1_HUMAN;sp|P00918|CAH2_HUMAN;sp|P19012|K1C15_HUMAN;sp|Q92764|KRT35_HUMAN;sp|Q08380|LG3BP_HUMAN;sp|P23280|CAH6_HUMAN;sp|Q9H190|SDCB2_HUMAN;sp|P16870|CBPE_HUMAN;sp|Q9NSB4|KRT82_HUMAN;sp|P60953|C…
S	Function unknown	POORLY CHARACTERIZED	3	sp|Q9HC35|EMAL4_HUMAN;sp|Q08380|LG3BP_HUMAN;sp|Q9H190|SDCB2_HUMAN
T	Signal transduction mechanisms	CELLULAR PROCESSES AND SIGNALING	7	sp|P0C869|PA24B_HUMAN;sp|O95831|AIFM1_HUMAN;sp|Q08380|LG3BP_HUMAN;sp|P35052|GPC1_HUMAN;sp|O75326|SEM7A_HUMAN;sp|P50552|VASP_HUMAN;sp|Q3MJ16|PA24E_HUMAN
U	Intracellular trafficking, secretion, and vesicular transport	CELLULAR PROCESSES AND SIGNALING	10	sp|Q6A163|K1C39_HUMAN;sp|Q9UL25|RAB21_HUMAN;sp|P0C869|PA24B_HUMAN;sp|Q9UEU0|VTI1B_HUMAN;sp|Q96CW1|AP2M1_HUMAN;sp|P19012|K1C15_HUMAN;sp|Q92764|KRT35_HUMAN;sp|O00161|SNP23_HUMAN;sp|P07355|ANXA2_HUMAN;sp|Q3MJ16|PA24E_HUMAN
V	Defense mechanisms	CELLULAR PROCESSES AND SIGNALING	4	sp|P01008|ANT3_HUMAN;sp|P30740|ILEU_HUMAN;sp|P35237|SPB6_HUMAN;sp|P01011|AACT_HUMAN
W	Extracellular structures	CELLULAR PROCESSES AND SIGNALING	2	sp|Q14118|DAG1_HUMAN;sp|P80108|PHLD_HUMAN
Y	Nuclear structure	CELLULAR PROCESSES AND SIGNALING	6	sp|Q6A163|K1C39_HUMAN;sp|P02545|LMNA_HUMAN;sp|Q14CN4|K2C72_HUMAN;sp|P19012|K1C15_HUMAN;sp|Q92764|KRT35_HUMAN;sp|Q9NSB4|KRT82_HUMAN
Z	Cytoskeleton	CELLULAR PROCESSES AND SIGNALING	1	sp|P35579|MYH9_HUMAN
