# Supplementary material for: Quantitative proteomics analysis of young and elderly skin with DIA mass spectrometry reveals new skin aging-related proteins
Source: Aging (Albany NY). 2020 Jun 29;12(13):13529–54. doi: 10.18632/aging.103461 (PMC7377841; doi:10.18632/aging.103461)
Supplement: Supplementary Table 7 [file aging-12-103461-s003..xlsx]

## Sheet: Sheet1
Table S7. KEGG pathway analysis of the DEPs
#Pathway	Numbers of differentially expressed proteins enriched into the pathway (89)	Numbers of all proteins in the pathway (1246)	Pvalue	Pathway ID	Proteins
Platelet activation	8	22	6.93e-05	ko04611	sp|O00161|SNP23_HUMAN;sp|P02671|FIBA_HUMAN;sp|P02675|FIBB_HUMAN;sp|P02679|FIBG_HUMAN;sp|P0C869|PA24B_HUMAN;sp|P50552|VASP_HUMAN;sp|P62834|RAP1A_HUMAN;sp|Q3MJ16|PA24E_HUMAN
Complement and coagulation cascades	7	23	0.000716719	ko04610	sp|P01008|ANT3_HUMAN;sp|P01023|A2MG_HUMAN;sp|P02671|FIBA_HUMAN;sp|P02675|FIBB_HUMAN;sp|P02679|FIBG_HUMAN;sp|P10909|CLUS_HUMAN;sp|P12273|PIP_HUMAN
Glycerophospholipid metabolism	4	15	0.0180566	ko00564	sp|P0C869|PA24B_HUMAN;sp|P43304|GPDM_HUMAN;sp|Q3MJ16|PA24E_HUMAN;sp|Q8IV08|PLD3_HUMAN
VEGF signaling pathway	3	9	0.0215981	ko04370	sp|P0C869|PA24B_HUMAN;sp|P60953|CDC42_HUMAN;sp|Q3MJ16|PA24E_HUMAN
Ovarian steroidogenesis	2	4	0.0275412	ko04913	sp|P0C869|PA24B_HUMAN;sp|Q3MJ16|PA24E_HUMAN
Ether lipid metabolism	3	11	0.0382221	ko00565	sp|P0C869|PA24B_HUMAN;sp|Q3MJ16|PA24E_HUMAN;sp|Q8IV08|PLD3_HUMAN
Linoleic acid metabolism	2	5	0.0437856	ko00591	sp|P0C869|PA24B_HUMAN;sp|Q3MJ16|PA24E_HUMAN
Nitrogen metabolism	2	5	0.0437856	ko00910	sp|P00918|CAH2_HUMAN;sp|P23280|CAH6_HUMAN
Arachidonic acid metabolism	3	13	0.059733	ko00590	sp|O15296|LX15B_HUMAN;sp|P0C869|PA24B_HUMAN;sp|Q3MJ16|PA24E_HUMAN
Renal cell carcinoma	2	6	0.0626677	ko05211	sp|P60953|CDC42_HUMAN;sp|P62834|RAP1A_HUMAN
Tight junction	4	22	0.0659913	ko04530	sp|P35579|MYH9_HUMAN;sp|P50552|VASP_HUMAN;sp|P60953|CDC42_HUMAN;sp|P62834|RAP1A_HUMAN
Bile secretion	1	1	0.0714286	ko04976	sp|P00918|CAH2_HUMAN
Glycosylphosphatidylinositol (GPI)-anchor biosynthesis	1	1	0.0714286	ko00563	sp|P80108|PHLD_HUMAN
MAPK signaling pathway	4	23	0.0756745	ko04010	sp|P0C869|PA24B_HUMAN;sp|P60953|CDC42_HUMAN;sp|P62834|RAP1A_HUMAN;sp|Q3MJ16|PA24E_HUMAN
Fc epsilon RI signaling pathway	3	15	0.0857454	ko04664	sp|P0C869|PA24B_HUMAN;sp|P0DOX6|IGM_HUMAN;sp|Q3MJ16|PA24E_HUMAN
Serotonergic synapse	3	15	0.0857454	ko04726	sp|O15296|LX15B_HUMAN;sp|P0C869|PA24B_HUMAN;sp|Q3MJ16|PA24E_HUMAN
Ras signaling pathway	4	25	0.0970544	ko04014	sp|P0C869|PA24B_HUMAN;sp|P60953|CDC42_HUMAN;sp|P62834|RAP1A_HUMAN;sp|Q3MJ16|PA24E_HUMAN
Leukocyte transendothelial migration	3	16	0.100275	ko04670	sp|P50552|VASP_HUMAN;sp|P60953|CDC42_HUMAN;sp|P62834|RAP1A_HUMAN
GnRH signaling pathway	3	16	0.100275	ko04912	sp|P0C869|PA24B_HUMAN;sp|P60953|CDC42_HUMAN;sp|Q3MJ16|PA24E_HUMAN
Necroptosis	4	27	0.120955	ko04217	sp|O95831|AIFM1_HUMAN;sp|P06737|PYGL_HUMAN;sp|P0C869|PA24B_HUMAN;sp|Q3MJ16|PA24E_HUMAN
Endocrine and other factor-regulated calcium reabsorption	2	9	0.130874	ko04961	sp|Q96CW1|AP2M1_HUMAN;sp|Q9HB07|MYG1_HUMAN
alpha-Linolenic acid metabolism	2	9	0.130874	ko00592	sp|P0C869|PA24B_HUMAN;sp|Q3MJ16|PA24E_HUMAN
Citrate cycle (TCA cycle)	2	9	0.130874	ko00020	sp|O75874|IDHC_HUMAN;sp|P40926|MDHM_HUMAN
DNA replication	1	2	0.137808	ko03030	sp|Q9HB07|MYG1_HUMAN
Rap1 signaling pathway	3	19	0.149027	ko04015	sp|P50552|VASP_HUMAN;sp|P60953|CDC42_HUMAN;sp|P62834|RAP1A_HUMAN
Choline metabolism in cancer	2	10	0.156272	ko05231	sp|P0C869|PA24B_HUMAN;sp|Q3MJ16|PA24E_HUMAN
Aminoacyl-tRNA biosynthesis	2	10	0.156272	ko00970	sp|P12081|SYHC_HUMAN;sp|P49590|SYHM_HUMAN
Long-term depression	2	10	0.156272	ko04730	sp|P0C869|PA24B_HUMAN;sp|Q3MJ16|PA24E_HUMAN
SNARE interactions in vesicular transport	2	11	0.182505	ko04130	sp|O00161|SNP23_HUMAN;sp|Q9UEU0|VTI1B_HUMAN
Pancreatic secretion	2	11	0.182505	ko04972	sp|P00918|CAH2_HUMAN;sp|P62834|RAP1A_HUMAN
Non-small cell lung cancer	1	3	0.199492	ko05223	sp|Q9HC35|EMAL4_HUMAN
Nucleotide excision repair	1	3	0.199492	ko03420	sp|Q9HB07|MYG1_HUMAN
Homologous recombination	1	3	0.199492	ko03440	sp|P46736|BRCC3_HUMAN
T cell receptor signaling pathway	1	3	0.199492	ko04660	sp|P60953|CDC42_HUMAN
Proximal tubule bicarbonate reclamation	1	3	0.199492	ko04964	sp|P00918|CAH2_HUMAN
Fc gamma R-mediated phagocytosis	3	22	0.203808	ko04666	sp|P0DOX6|IGM_HUMAN;sp|P50552|VASP_HUMAN;sp|P60953|CDC42_HUMAN
Dilated cardiomyopathy (DCM)	3	22	0.203808	ko05414	sp|P02545|LMNA_HUMAN;sp|P0DOX6|IGM_HUMAN;sp|Q14118|DAG1_HUMAN
Axon guidance	2	12	0.209329	ko04360	sp|O75326|SEM7A_HUMAN;sp|P60953|CDC42_HUMAN
Cysteine and methionine metabolism	2	12	0.209329	ko00270	sp|P07195|LDHB_HUMAN;sp|P40926|MDHM_HUMAN
Chemokine signaling pathway	2	12	0.209329	ko04062	sp|P60953|CDC42_HUMAN;sp|P62834|RAP1A_HUMAN
Arrhythmogenic right ventricular cardiomyopathy (ARVC)	2	12	0.209329	ko05412	sp|P02545|LMNA_HUMAN;sp|Q14118|DAG1_HUMAN
PPAR signaling pathway	2	13	0.236528	ko03320	sp|P02647|APOA1_HUMAN;sp|P02652|APOA2_HUMAN
Vascular smooth muscle contraction	2	13	0.236528	ko04270	sp|P0C869|PA24B_HUMAN;sp|Q3MJ16|PA24E_HUMAN
Glucagon signaling pathway	2	13	0.236528	ko04922	sp|P06737|PYGL_HUMAN;sp|P07195|LDHB_HUMAN
Hypertrophic cardiomyopathy (HCM)	2	13	0.236528	ko05410	sp|P02545|LMNA_HUMAN;sp|Q14118|DAG1_HUMAN
Phospholipase D signaling pathway	3	24	0.242598	ko04072	sp|P0C869|PA24B_HUMAN;sp|P0DOX6|IGM_HUMAN;sp|Q3MJ16|PA24E_HUMAN
Mismatch repair	1	4	0.25681	ko03430	sp|Q9HB07|MYG1_HUMAN
Pancreatic cancer	1	4	0.25681	ko05212	sp|P60953|CDC42_HUMAN
Focal adhesion	3	25	0.262444	ko04510	sp|P50552|VASP_HUMAN;sp|P60953|CDC42_HUMAN;sp|P62834|RAP1A_HUMAN
Viral myocarditis	3	25	0.262444	ko05416	sp|P0DOX6|IGM_HUMAN;sp|P0DPA2|VSIG8_HUMAN;sp|Q14118|DAG1_HUMAN
Neurotrophin signaling pathway	2	14	0.263915	ko04722	sp|P60953|CDC42_HUMAN;sp|P62834|RAP1A_HUMAN
Glutamatergic synapse	2	14	0.263915	ko04724	sp|P0C869|PA24B_HUMAN;sp|Q3MJ16|PA24E_HUMAN
IL-17 signaling pathway	2	14	0.263915	ko04657	sp|P26447|S10A4_HUMAN;sp|P33764|S10A3_HUMAN
Cholesterol metabolism	2	15	0.291326	ko04979	sp|P02647|APOA1_HUMAN;sp|P02652|APOA2_HUMAN
Inflammatory mediator regulation of TRP channels	2	15	0.291326	ko04750	sp|P0C869|PA24B_HUMAN;sp|Q3MJ16|PA24E_HUMAN
Mineral absorption	1	5	0.310066	ko04978	sp|Q9HB07|MYG1_HUMAN
Vitamin digestion and absorption	1	5	0.310066	ko04977	sp|P02647|APOA1_HUMAN
Fat digestion and absorption	1	5	0.310066	ko04975	sp|P02647|APOA1_HUMAN
Transcriptional misregulation in cancer	2	17	0.345672	ko05202	sp|O43278|SPIT1_HUMAN;sp|P0DOX6|IGM_HUMAN
Insulin resistance	1	6	0.359545	ko04931	sp|P06737|PYGL_HUMAN
Starch and sucrose metabolism	1	6	0.359545	ko00500	sp|P06737|PYGL_HUMAN
2-Oxocarboxylic acid metabolism	1	6	0.359545	ko01210	sp|O75874|IDHC_HUMAN
Pyruvate metabolism	2	19	0.398658	ko00620	sp|P07195|LDHB_HUMAN;sp|P40926|MDHM_HUMAN
Amoebiasis	3	32	0.403689	ko05146	sp|P0DOX6|IGM_HUMAN;sp|P30740|ILEU_HUMAN;sp|P35237|SPB6_HUMAN
Parathyroid hormone synthesis, secretion and action	1	7	0.405513	ko04928	sp|Q9HB07|MYG1_HUMAN
Prostate cancer	1	7	0.405513	ko05215	sp|O43278|SPIT1_HUMAN
Alanine, aspartate and glutamate metabolism	1	7	0.405513	ko00250	sp|Q9NQR4|NIT2_HUMAN
AGE-RAGE signaling pathway in diabetic complications	1	8	0.448217	ko04933	sp|P60953|CDC42_HUMAN
Tyrosine metabolism	1	8	0.448217	ko00350	sp|P16930|FAAA_HUMAN
HIF-1 signaling pathway	1	8	0.448217	ko04066	sp|P04406|G3P_HUMAN
Fatty acid elongation	1	8	0.448217	ko00062	sp|A1L3X0|ELOV7_HUMAN
Renin-angiotensin system	1	8	0.448217	ko04614	sp|O75787|RENR_HUMAN
ECM-receptor interaction	1	8	0.448217	ko04512	sp|Q14118|DAG1_HUMAN
Oxytocin signaling pathway	2	21	0.44963	ko04921	sp|P0C869|PA24B_HUMAN;sp|Q3MJ16|PA24E_HUMAN
Staphylococcus aureus infection	2	21	0.44963	ko05150	sp|P02679|FIBG_HUMAN;sp|P0DOX6|IGM_HUMAN
Biosynthesis of unsaturated fatty acids	1	9	0.487884	ko01040	sp|A1L3X0|ELOV7_HUMAN
Collecting duct acid secretion	1	9	0.487884	ko04966	sp|P00918|CAH2_HUMAN
Insulin signaling pathway	1	9	0.487884	ko04910	sp|P06737|PYGL_HUMAN
Proteasome	2	23	0.498135	ko03050	sp|P28066|PSA5_HUMAN;sp|Q99436|PSB7_HUMAN
Proteoglycans in cancer	2	24	0.521365	ko05205	sp|P35052|GPC1_HUMAN;sp|P60953|CDC42_HUMAN
Apoptosis	2	24	0.521365	ko04210	sp|O95831|AIFM1_HUMAN;sp|P02545|LMNA_HUMAN
Porphyrin and chlorophyll metabolism	1	10	0.52473	ko00860	sp|P00450|CERU_HUMAN
Propanoate metabolism	1	10	0.52473	ko00640	sp|P07195|LDHB_HUMAN
Gastric acid secretion	1	10	0.52473	ko04971	sp|P00918|CAH2_HUMAN
Ferroptosis	1	10	0.52473	ko04216	sp|P00450|CERU_HUMAN
Non-alcoholic fatty liver disease (NAFLD)	1	10	0.52473	ko04932	sp|P60953|CDC42_HUMAN
Estrogen signaling pathway	3	40	0.554642	ko04915	sp|P19012|K1C15_HUMAN;sp|Q6A163|K1C39_HUMAN;sp|Q92764|KRT35_HUMAN
Apoptosis - fly	1	11	0.558953	ko04214	sp|O95831|AIFM1_HUMAN
Epithelial cell signaling in Helicobacter pylori infection	1	11	0.558953	ko05120	sp|P60953|CDC42_HUMAN
Type I diabetes mellitus	1	11	0.558953	ko04940	sp|P16870|CBPE_HUMAN
Cushing syndrome	1	11	0.558953	ko04934	sp|P62834|RAP1A_HUMAN
Biosynthesis of amino acids	2	27	0.5867	ko01230	sp|O75874|IDHC_HUMAN;sp|P04406|G3P_HUMAN
Glycolysis / Gluconeogenesis	2	27	0.5867	ko00010	sp|P04406|G3P_HUMAN;sp|P07195|LDHB_HUMAN
Natural killer cell mediated cytotoxicity	1	12	0.590737	ko04650	sp|P0DOX6|IGM_HUMAN
Glutathione metabolism	1	12	0.590737	ko00480	sp|O75874|IDHC_HUMAN
B cell receptor signaling pathway	1	12	0.590737	ko04662	sp|P0DOX6|IGM_HUMAN
Glyoxylate and dicarboxylate metabolism	1	12	0.590737	ko00630	sp|P40926|MDHM_HUMAN
Shigellosis	1	12	0.590737	ko05131	sp|P60953|CDC42_HUMAN
Long-term potentiation	1	12	0.590737	ko04720	sp|P62834|RAP1A_HUMAN
Carbon metabolism	3	43	0.605304	ko01200	sp|O75874|IDHC_HUMAN;sp|P04406|G3P_HUMAN;sp|P40926|MDHM_HUMAN
Primary immunodeficiency	1	13	0.620254	ko05340	sp|P0DOX6|IGM_HUMAN
NF-kappa B signaling pathway	1	13	0.620254	ko04064	sp|P0DOX6|IGM_HUMAN
Arginine and proline metabolism	1	13	0.620254	ko00330	sp|P06732|KCRM_HUMAN
Adherens junction	1	13	0.620254	ko04520	sp|P60953|CDC42_HUMAN
Legionellosis	1	14	0.647665	ko05134	sp|P55072|TERA_HUMAN
Asthma	1	14	0.647665	ko05310	sp|P0DOX6|IGM_HUMAN
cAMP signaling pathway	1	15	0.673118	ko04024	sp|P62834|RAP1A_HUMAN
Salivary secretion	1	15	0.673118	ko04970	sp|P01034|CYTC_HUMAN
Intestinal immune network for IgA production	1	15	0.673118	ko04672	sp|P0DOX6|IGM_HUMAN
Peroxisome	1	16	0.696751	ko04146	sp|O75874|IDHC_HUMAN
Drug metabolism - other enzymes	1	16	0.696751	ko00983	sp|P00492|HPRT_HUMAN
cGMP-PKG signaling pathway	1	16	0.696751	ko04022	sp|P50552|VASP_HUMAN
Fatty acid metabolism	1	16	0.696751	ko01212	sp|A1L3X0|ELOV7_HUMAN
Pathogenic Escherichia coli infection	1	16	0.696751	ko05130	sp|P60953|CDC42_HUMAN
Epstein-Barr virus infection	2	33	0.697256	ko05169	sp|P0DOX6|IGM_HUMAN;sp|P61769|B2MG_HUMAN
Purine metabolism	1	17	0.718693	ko00230	sp|P00492|HPRT_HUMAN
Bacterial invasion of epithelial cells	1	17	0.718693	ko05100	sp|P60953|CDC42_HUMAN
Measles	1	17	0.718693	ko05162	sp|P0DOX6|IGM_HUMAN
Salmonella infection	1	17	0.718693	ko05132	sp|P60953|CDC42_HUMAN
Leishmaniasis	1	18	0.739065	ko05140	sp|P0DOX6|IGM_HUMAN
Autoimmune thyroid disease	1	18	0.739065	ko05320	sp|P0DOX6|IGM_HUMAN
Allograft rejection	1	18	0.739065	ko05330	sp|P0DOX6|IGM_HUMAN
Hematopoietic cell lineage	1	18	0.739065	ko04640	sp|P0DOX6|IGM_HUMAN
NOD-like receptor signaling pathway	1	19	0.757976	ko04621	sp|P46736|BRCC3_HUMAN
Synaptic vesicle cycle	1	20	0.775531	ko04721	sp|Q96CW1|AP2M1_HUMAN
Fluid shear stress and atherosclerosis	1	20	0.775531	ko05418	sp|P35052|GPC1_HUMAN
Influenza A	1	21	0.791826	ko05164	sp|Q9BYE2|TMPSD_HUMAN
Pathways in cancer	2	40	0.794483	ko05200	sp|P60953|CDC42_HUMAN;sp|Q9HC35|EMAL4_HUMAN
Tuberculosis	2	41	0.805895	ko05152	sp|P0DOX6|IGM_HUMAN;sp|Q9HB07|MYG1_HUMAN
Human T-cell leukemia virus 1 infection	1	22	0.806951	ko05166	sp|P61769|B2MG_HUMAN
Huntington disease	1	22	0.806951	ko05016	sp|Q96CW1|AP2M1_HUMAN
Human cytomegalovirus infection	1	24	0.834015	ko05163	sp|P61769|B2MG_HUMAN
Metabolic pathways	14	238	0.836225	ko01100	sp|A1L3X0|ELOV7_HUMAN;sp|O15296|LX15B_HUMAN;sp|O75874|IDHC_HUMAN;sp|P00492|HPRT_HUMAN;sp|P04406|G3P_HUMAN;sp|P06732|KCRM_HUMAN;sp|P06737|PYGL_HUMAN;sp|P07195|LDHB_HUMAN;sp|P0C869|PA24B_HUMAN;sp|P16930|FAAA_HUMAN;sp|P40926|MDHM_HUMAN;sp|P80108|PHLD_HUMAN;sp|Q3MJ16|PA24E_HUMAN;sp|Q8IV08|PLD3_HUMAN
Antigen processing and presentation	1	25	0.846104	ko04612	sp|P61769|B2MG_HUMAN
Systemic lupus erythematosus	1	26	0.857321	ko05322	sp|P0DOX6|IGM_HUMAN
Rheumatoid arthritis	1	26	0.857321	ko05323	sp|P0DOX6|IGM_HUMAN
Endocytosis	2	47	0.863342	ko04144	sp|P60953|CDC42_HUMAN;sp|Q96CW1|AP2M1_HUMAN
Calcium signaling pathway	1	27	0.86773	ko04020	sp|P0DOX6|IGM_HUMAN
Human immunodeficiency virus 1 infection	1	27	0.86773	ko05170	sp|P61769|B2MG_HUMAN
Viral carcinogenesis	1	27	0.86773	ko05203	sp|P60953|CDC42_HUMAN
Alzheimer disease	1	28	0.877387	ko05010	sp|P04406|G3P_HUMAN
Regulation of actin cytoskeleton	1	32	0.90952	ko04810	sp|P60953|CDC42_HUMAN
PI3K-Akt signaling pathway	1	32	0.90952	ko04151	sp|P0DOX6|IGM_HUMAN
Human papillomavirus infection	1	34	0.922305	ko05165	sp|P60953|CDC42_HUMAN
Protein processing in endoplasmic reticulum	1	50	0.97725	ko04141	sp|P55072|TERA_HUMAN
Phagosome	1	57	0.986778	ko04145	sp|P0DOX6|IGM_HUMAN
