# Supplementary material for: Quantitative proteomics analysis of young and elderly skin with DIA mass spectrometry reveals new skin aging-related proteins
Source: Aging (Albany NY). 2020 Jun 29;12(13):13529–54. doi: 10.18632/aging.103461 (PMC7377841; doi:10.18632/aging.103461)
Supplement: Supplementary Table 8 [file aging-12-103461-s002..xlsx]

## Sheet: Sheet1
Table S8. Subcellular localization of DEPs
SeqID	Subcellular_location	Description
sp|A1L3X0|ELOV7_HUMAN	plas	Elongation of very long chain fatty acids protein 7 OS=Homo sapiens OX=9606 GN=ELOVL7 PE=1 SV=1
sp|O00161|SNP23_HUMAN	cyto	Synaptosomal-associated protein 23 OS=Homo sapiens OX=9606 GN=SNAP23 PE=1 SV=1
sp|O15296|LX15B_HUMAN	nucl	Arachidonate 15-lipoxygenase B OS=Homo sapiens OX=9606 GN=ALOX15B PE=1 SV=3
sp|O43278|SPIT1_HUMAN	plas	Kunitz-type protease inhibitor 1 OS=Homo sapiens OX=9606 GN=SPINT1 PE=1 SV=2
sp|O75326|SEM7A_HUMAN	nucl	Semaphorin-7A OS=Homo sapiens OX=9606 GN=SEMA7A PE=1 SV=1
sp|O75531|BAF_HUMAN	extr	Barrier-to-autointegration factor OS=Homo sapiens OX=9606 GN=BANF1 PE=1 SV=1
sp|O75787|RENR_HUMAN	E.R.	Renin receptor OS=Homo sapiens OX=9606 GN=ATP6AP2 PE=1 SV=2
sp|O75874|IDHC_HUMAN	cyto	Isocitrate dehydrogenase [NADP] cytoplasmic OS=Homo sapiens OX=9606 GN=IDH1 PE=1 SV=2
sp|O95831|AIFM1_HUMAN	mito	Apoptosis-inducing factor 1, mitochondrial OS=Homo sapiens OX=9606 GN=AIFM1 PE=1 SV=1
sp|O95969|SG1D2_HUMAN	extr	Secretoglobin family 1D member 2 OS=Homo sapiens OX=9606 GN=SCGB1D2 PE=2 SV=1
sp|P00450|CERU_HUMAN	E.R.	Ceruloplasmin OS=Homo sapiens OX=9606 GN=CP PE=1 SV=1
sp|P00492|HPRT_HUMAN	cyto	Hypoxanthine-guanine phosphoribosyltransferase OS=Homo sapiens OX=9606 GN=HPRT1 PE=1 SV=2
sp|P00738|HPT_HUMAN	extr	Haptoglobin OS=Homo sapiens OX=9606 GN=HP PE=1 SV=1
sp|P00918|CAH2_HUMAN	cyto	Carbonic anhydrase 2 OS=Homo sapiens OX=9606 GN=CA2 PE=1 SV=2
sp|P01008|ANT3_HUMAN	extr	Antithrombin-III OS=Homo sapiens OX=9606 GN=SERPINC1 PE=1 SV=1
sp|P01011|AACT_HUMAN	extr	Alpha-1-antichymotrypsin OS=Homo sapiens OX=9606 GN=SERPINA3 PE=1 SV=2
sp|P01023|A2MG_HUMAN	extr	Alpha-2-macroglobulin OS=Homo sapiens OX=9606 GN=A2M PE=1 SV=3
sp|P01034|CYTC_HUMAN	extr	Cystatin-C OS=Homo sapiens OX=9606 GN=CST3 PE=1 SV=1
sp|P01040|CYTA_HUMAN	cyto	Cystatin-A OS=Homo sapiens OX=9606 GN=CSTA PE=1 SV=1
sp|P02545|LMNA_HUMAN	nucl	Prelamin-A/C OS=Homo sapiens OX=9606 GN=LMNA PE=1 SV=1
sp|P02647|APOA1_HUMAN	extr	Apolipoprotein A-I OS=Homo sapiens OX=9606 GN=APOA1 PE=1 SV=1
sp|P02652|APOA2_HUMAN	extr	Apolipoprotein A-II OS=Homo sapiens OX=9606 GN=APOA2 PE=1 SV=1
sp|P02671|FIBA_HUMAN	extr	Fibrinogen alpha chain OS=Homo sapiens OX=9606 GN=FGA PE=1 SV=2
sp|P02675|FIBB_HUMAN	extr	Fibrinogen beta chain OS=Homo sapiens OX=9606 GN=FGB PE=1 SV=2
sp|P02679|FIBG_HUMAN	mito	Fibrinogen gamma chain OS=Homo sapiens OX=9606 GN=FGG PE=1 SV=3
sp|P02763|A1AG1_HUMAN	extr	Alpha-1-acid glycoprotein 1 OS=Homo sapiens OX=9606 GN=ORM1 PE=1 SV=1
sp|P02774|VTDB_HUMAN	extr	Vitamin D-binding protein OS=Homo sapiens OX=9606 GN=GC PE=1 SV=2
sp|P04406|G3P_HUMAN	cyto	Glyceraldehyde-3-phosphate dehydrogenase OS=Homo sapiens OX=9606 GN=GAPDH PE=1 SV=3
sp|P06732|KCRM_HUMAN	cyto	Creatine kinase M-type OS=Homo sapiens OX=9606 GN=CKM PE=1 SV=2
sp|P06737|PYGL_HUMAN	cyto	Glycogen phosphorylase, liver form OS=Homo sapiens OX=9606 GN=PYGL PE=1 SV=4
sp|P07195|LDHB_HUMAN	cyto	L-lactate dehydrogenase B chain OS=Homo sapiens OX=9606 GN=LDHB PE=1 SV=2
sp|P07355|ANXA2_HUMAN	cyto	Annexin A2 OS=Homo sapiens OX=9606 GN=ANXA2 PE=1 SV=2
sp|P08582|TRFM_HUMAN	extr	Melanotransferrin OS=Homo sapiens OX=9606 GN=MELTF PE=1 SV=2
sp|P0C869|PA24B_HUMAN	mito	Cytosolic phospholipase A2 beta OS=Homo sapiens OX=9606 GN=PLA2G4B PE=1 SV=2
sp|P0DOX6|IGM_HUMAN	mito	Immunoglobulin mu heavy chain OS=Homo sapiens OX=9606 PE=1 SV=2
sp|P0DPA2|VSIG8_HUMAN	plas	V-set and immunoglobulin domain-containing protein 8 OS=Homo sapiens OX=9606 GN=VSIG8 PE=2 SV=1
sp|P10909|CLUS_HUMAN	extr	Clusterin OS=Homo sapiens OX=9606 GN=CLU PE=1 SV=1
sp|P12081|SYHC_HUMAN	cyto	Histidine--tRNA ligase, cytoplasmic OS=Homo sapiens OX=9606 GN=HARS PE=1 SV=2
sp|P12273|PIP_HUMAN	extr	Prolactin-inducible protein OS=Homo sapiens OX=9606 GN=PIP PE=1 SV=1
sp|P16870|CBPE_HUMAN	extr	Carboxypeptidase E OS=Homo sapiens OX=9606 GN=CPE PE=1 SV=1
sp|P16930|FAAA_HUMAN	cyto	Fumarylacetoacetase OS=Homo sapiens OX=9606 GN=FAH PE=1 SV=2
sp|P19012|K1C15_HUMAN	nucl	Keratin, type I cytoskeletal 15 OS=Homo sapiens OX=9606 GN=KRT15 PE=1 SV=3
sp|P23280|CAH6_HUMAN	extr	Carbonic anhydrase 6 OS=Homo sapiens OX=9606 GN=CA6 PE=1 SV=3
sp|P26447|S10A4_HUMAN	extr	Protein S100-A4 OS=Homo sapiens OX=9606 GN=S100A4 PE=1 SV=1
sp|P28066|PSA5_HUMAN	cyto	Proteasome subunit alpha type-5 OS=Homo sapiens OX=9606 GN=PSMA5 PE=1 SV=3
sp|P30740|ILEU_HUMAN	cyto	Leukocyte elastase inhibitor OS=Homo sapiens OX=9606 GN=SERPINB1 PE=1 SV=1
sp|P33764|S10A3_HUMAN	extr	Protein S100-A3 OS=Homo sapiens OX=9606 GN=S100A3 PE=1 SV=1
sp|P35052|GPC1_HUMAN	extr	Glypican-1 OS=Homo sapiens OX=9606 GN=GPC1 PE=1 SV=2
sp|P35237|SPB6_HUMAN	cyto	Serpin B6 OS=Homo sapiens OX=9606 GN=SERPINB6 PE=1 SV=3
sp|P35579|MYH9_HUMAN	cyto_nucl	Myosin-9 OS=Homo sapiens OX=9606 GN=MYH9 PE=1 SV=4
sp|P40926|MDHM_HUMAN	mito	Malate dehydrogenase, mitochondrial OS=Homo sapiens OX=9606 GN=MDH2 PE=1 SV=3
sp|P43304|GPDM_HUMAN	mito	Glycerol-3-phosphate dehydrogenase, mitochondrial OS=Homo sapiens OX=9606 GN=GPD2 PE=1 SV=3
sp|P46736|BRCC3_HUMAN	cyto	Lys-63-specific deubiquitinase BRCC36 OS=Homo sapiens OX=9606 GN=BRCC3 PE=1 SV=2
sp|P49590|SYHM_HUMAN	mito	Probable histidine--tRNA ligase, mitochondrial OS=Homo sapiens OX=9606 GN=HARS2 PE=1 SV=1
sp|P50552|VASP_HUMAN	nucl	Vasodilator-stimulated phosphoprotein OS=Homo sapiens OX=9606 GN=VASP PE=1 SV=3
sp|P50990|TCPQ_HUMAN	cyto	T-complex protein 1 subunit theta OS=Homo sapiens OX=9606 GN=CCT8 PE=1 SV=4
sp|P55072|TERA_HUMAN	cyto_nucl	Transitional endoplasmic reticulum ATPase OS=Homo sapiens OX=9606 GN=VCP PE=1 SV=4
sp|P60953|CDC42_HUMAN	cyto	Cell division control protein 42 homolog OS=Homo sapiens OX=9606 GN=CDC42 PE=1 SV=2
sp|P61604|CH10_HUMAN	mito	10 kDa heat shock protein, mitochondrial OS=Homo sapiens OX=9606 GN=HSPE1 PE=1 SV=2
sp|P61769|B2MG_HUMAN	extr	Beta-2-microglobulin OS=Homo sapiens OX=9606 GN=B2M PE=1 SV=1
sp|P62834|RAP1A_HUMAN	cyto	Ras-related protein Rap-1A OS=Homo sapiens OX=9606 GN=RAP1A PE=1 SV=1
sp|P68871|HBB_HUMAN	cyto	Hemoglobin subunit beta OS=Homo sapiens OX=9606 GN=HBB PE=1 SV=2
sp|P69905|HBA_HUMAN	cyto	Hemoglobin subunit alpha OS=Homo sapiens OX=9606 GN=HBA1 PE=1 SV=2
sp|P80108|PHLD_HUMAN	extr	Phosphatidylinositol-glycan-specific phospholipase D OS=Homo sapiens OX=9606 GN=GPLD1 PE=1 SV=3
sp|P81605|DCD_HUMAN	extr	Dermcidin OS=Homo sapiens OX=9606 GN=DCD PE=1 SV=2
sp|Q08380|LG3BP_HUMAN	extr	Galectin-3-binding protein OS=Homo sapiens OX=9606 GN=LGALS3BP PE=1 SV=1
sp|Q14118|DAG1_HUMAN	plas	Dystroglycan OS=Homo sapiens OX=9606 GN=DAG1 PE=1 SV=2
sp|Q14CN4|K2C72_HUMAN	mito	Keratin, type II cytoskeletal 72 OS=Homo sapiens OX=9606 GN=KRT72 PE=1 SV=2
sp|Q15018|ABRX2_HUMAN	plas	BRISC complex subunit Abraxas 2 OS=Homo sapiens OX=9606 GN=ABRAXAS2 PE=1 SV=2
sp|Q15631|TSN_HUMAN	cyto	Translin OS=Homo sapiens OX=9606 GN=TSN PE=1 SV=1
sp|Q16610|ECM1_HUMAN	extr	Extracellular matrix protein 1 OS=Homo sapiens OX=9606 GN=ECM1 PE=1 SV=2
sp|Q2TAY7|SMU1_HUMAN	cyto	WD40 repeat-containing protein SMU1 OS=Homo sapiens OX=9606 GN=SMU1 PE=1 SV=2
sp|Q3MJ16|PA24E_HUMAN	cyto	Cytosolic phospholipase A2 epsilon OS=Homo sapiens OX=9606 GN=PLA2G4E PE=2 SV=4
sp|Q6A163|K1C39_HUMAN	cyto_nucl	Keratin, type I cytoskeletal 39 OS=Homo sapiens OX=9606 GN=KRT39 PE=1 SV=2
sp|Q6ZNF0|ACP7_HUMAN	extr	Acid phosphatase type 7 OS=Homo sapiens OX=9606 GN=ACP7 PE=2 SV=2
sp|Q719H9|KCTD1_HUMAN	cyto_nucl	BTB/POZ domain-containing protein KCTD1 OS=Homo sapiens OX=9606 GN=KCTD1 PE=1 SV=1
sp|Q7Z2K6|ERMP1_HUMAN	plas	Endoplasmic reticulum metallopeptidase 1 OS=Homo sapiens OX=9606 GN=ERMP1 PE=1 SV=2
sp|Q8IV08|PLD3_HUMAN	plas	Phospholipase D3 OS=Homo sapiens OX=9606 GN=PLD3 PE=1 SV=1
sp|Q92764|KRT35_HUMAN	mito	Keratin, type I cuticular Ha5 OS=Homo sapiens OX=9606 GN=KRT35 PE=2 SV=5
sp|Q96CW1|AP2M1_HUMAN	cyto	AP-2 complex subunit mu OS=Homo sapiens OX=9606 GN=AP2M1 PE=1 SV=2
sp|Q96DR8|MUCL1_HUMAN	extr	Mucin-like protein 1 OS=Homo sapiens OX=9606 GN=MUCL1 PE=1 SV=1
sp|Q99436|PSB7_HUMAN	cyto	Proteasome subunit beta type-7 OS=Homo sapiens OX=9606 GN=PSMB7 PE=1 SV=1
sp|Q99536|VAT1_HUMAN	cyto	Synaptic vesicle membrane protein VAT-1 homolog OS=Homo sapiens OX=9606 GN=VAT1 PE=1 SV=2
sp|Q9BYE2|TMPSD_HUMAN	cyto	Transmembrane protease serine 13 OS=Homo sapiens OX=9606 GN=TMPRSS13 PE=2 SV=4
sp|Q9H190|SDCB2_HUMAN	cyto	Syntenin-2 OS=Homo sapiens OX=9606 GN=SDCBP2 PE=1 SV=2
sp|Q9HB07|MYG1_HUMAN	mito	UPF0160 protein MYG1, mitochondrial OS=Homo sapiens OX=9606 GN=C12orf10 PE=1 SV=2
sp|Q9HC35|EMAL4_HUMAN	plas	Echinoderm microtubule-associated protein-like 4 OS=Homo sapiens OX=9606 GN=EML4 PE=1 SV=3
sp|Q9NQR4|NIT2_HUMAN	mito	Omega-amidase NIT2 OS=Homo sapiens OX=9606 GN=NIT2 PE=1 SV=1
sp|Q9NSB4|KRT82_HUMAN	mito	Keratin, type II cuticular Hb2 OS=Homo sapiens OX=9606 GN=KRT82 PE=3 SV=3
sp|Q9NTM9|CUTC_HUMAN	mito	Copper homeostasis protein cutC homolog OS=Homo sapiens OX=9606 GN=CUTC PE=1 SV=1
sp|Q9UEU0|VTI1B_HUMAN	pero	Vesicle transport through interaction with t-SNAREs homolog 1B OS=Homo sapiens OX=9606 GN=VTI1B PE=1 SV=3
sp|Q9UHW9|S12A6_HUMAN	plas	Solute carrier family 12 member 6 OS=Homo sapiens OX=9606 GN=SLC12A6 PE=1 SV=2
sp|Q9UL18|AGO1_HUMAN	cyto	Protein argonaute-1 OS=Homo sapiens OX=9606 GN=AGO1 PE=1 SV=3
sp|Q9UL25|RAB21_HUMAN	cyto	Ras-related protein Rab-21 OS=Homo sapiens OX=9606 GN=RAB21 PE=1 SV=3
sp|Q9ULI1|NWD2_HUMAN	cyto	NACHT and WD repeat domain-containing protein 2 OS=Homo sapiens OX=9606 GN=NWD2 PE=2 SV=3
